# 1     **The long non-coding RNA *GHSROS* reprograms prostate cancer cell lines** 2                                   **toward a more aggressive phenotype**

3  
4     Patrick B. Thomas<sup>1,2,3</sup>, Penny L. Jeffery<sup>1,2,3</sup>, Manuel D. Gahete<sup>4,5,6,7,8</sup>, Eliza J. Whiteside<sup>9,10,†</sup>,  
5     Carina Walpole<sup>1,3</sup>, Michelle L. Maugham<sup>1,2,3</sup>, Lidija Jovanovic<sup>3</sup>, Jennifer H. Gunter<sup>3</sup>,  
6     Elizabeth D. Williams<sup>3</sup>, Colleen C. Nelson<sup>3</sup>, Adrian C. Herington<sup>1,3</sup>, Raúl M. Luque<sup>4,5,6,7,8</sup>,  
7     Rakesh N. Veedu<sup>11</sup>, Lisa K. Chopin<sup>1,2,3,\*</sup>, Inge Seim<sup>1,2,3,12,\*</sup>

8  
9     <sup>1</sup> Ghrelin Research Group, Translational Research Institute- Institute of Health and  
10     Biomedical Innovation, School of Biomedical Sciences, Queensland University of  
11     Technology (QUT), Woolloongabba, Queensland 4102, Australia.

12    <sup>2</sup> Comparative and Endocrine Biology Laboratory, Translational Research Institute-Institute  
13    of Health and Biomedical Innovation, School of Biomedical Sciences, Queensland  
14    University of Technology, Woolloongabba, Queensland 4102, Australia.

15    <sup>3</sup> Australian Prostate Cancer Research Centre–Queensland, Institute of Health and  
16    Biomedical Innovation, School of Biomedical Sciences, Queensland University of  
17    Technology (QUT), Princess Alexandra Hospital, Translational Research Institute,  
18    Woolloongabba, Queensland 4102, Australia.

19    <sup>4</sup> Maimonides Institute of Biomedical Research of Cordoba (IMIBIC), Córdoba, 14004,  
20    Spain.

21    <sup>5</sup> Department of Cell Biology, Physiology and Immunology, University of Córdoba, Córdoba,  
22    14004, Spain.

23    <sup>6</sup> Hospital Universitario Reina Sofía (HURS), Córdoba, 14004, Spain.

24    <sup>7</sup> CIBER de la Fisiopatología de la Obesidad y Nutrición (CIBERObn), Córdoba, 14004,  
25    Spain.

26    <sup>8</sup> Campus de Excelencia Internacional Agroalimentario (ceiA3), Córdoba, 14004, Spain.

27    <sup>9</sup> Centre for Health Research, University of Southern Queensland, Toowoomba, Queensland  
28    4350, Australia.

29    <sup>10</sup> Institute for Life Sciences and the Environment, University of Southern Queensland,  
30    Toowoomba, Queensland 4350, Australia.

31    <sup>11</sup> Centre for Comparative Genomics, Murdoch University & Perron Institute for  
32    Neurological and Translational Science, Perth, Western Australia 6150, Australia.

33 <sup>12</sup> Integrative Biology Laboratory, College of Life Sciences, Nanjing Normal University, 1  
34 Wenyuan Road, 210023, Nanjing, China.

35 † Present address: Moffitt Cancer Center and Research Institute, Tampa, FL, 33612, USA.

36 \* Correspondence to [inge@seimlab.org](mailto:inge@seimlab.org) or [l.chopin@qut.edu.au](mailto:l.chopin@qut.edu.au).

37

38 **Short running title:** *GHSROS* in prostate cancer

39 **Key words:** long non-coding RNA, antisense transcript, prostate cancer, tumour growth,

40 gene expression

41

42 **ABSTRACT**

43 It is now appreciated that long non-coding RNAs (lncRNAs) are important players in the  
44 orchestration of cancer progression. In this study we characterized *GHSROS*, a human  
45 lncRNA gene on the opposite DNA strand (antisense) to the ghrelin receptor gene, in prostate  
46 cancer. The lncRNA was upregulated by prostate tumors from different clinical datasets.  
47 Consistently, transcriptome data revealed that *GHSROS* alters the expression of cancer-  
48 associated genes. Functional analyses *in vitro* showed that *GHSROS* mediates tumor growth,  
49 migration, and survival and resistance to the cytotoxic drug docetaxel. Increased cellular  
50 proliferation of *GHSROS*-overexpressing PC3, DU145, and LNCaP prostate cancer cell lines  
51 *in vitro* was recapitulated in a subcutaneous xenograft model. Conversely, *in vitro* antisense  
52 oligonucleotide inhibition of the lncRNA reciprocally regulated cell growth and migration,  
53 and gene expression. Notably, *GHSROS* modulates the expression of *PPP2R2C*, the loss of  
54 which may drive androgen receptor pathway-independent prostate tumor progression in a  
55 subset of prostate cancers. Collectively, our findings suggest that *GHSROS* can reprogram  
56 prostate cancer cells toward a more aggressive phenotype and that this lncRNA may  
57 represent a potential therapeutic target.

58

59 **Keywords:** long non-coding RNA, lncRNA, prostate cancer

60

## 61 INTRODUCTION

62 The human genome yields a multitude of RNA transcripts with no obvious protein-coding  
63 ability, collectively termed non-coding RNAs (ncRNAs)<sup>1</sup>. A decade of intensive research has  
64 revealed that many ncRNAs greater than 200 nucleotides in length have expression patterns  
65 and functions as diverse as protein-coding RNAs<sup>1,2</sup>. These long non-coding RNAs  
66 (lncRNAs) have emerged as important regulators of gene expression, acting on nearby (*cis*)  
67 or distant (*trans*) protein-coding genes<sup>2</sup>. Although the vast majority of lncRNAs remain  
68 uncharacterized, it is clear that they play key regulatory roles in development, normal  
69 physiology, and disease.

70  
71 We previously<sup>3</sup> identified *GHSROS* (also known as *AS-GHSR*), a 1.1-kb capped and  
72 polyadenylated lncRNA gene antisense to the intronic region of the ghrelin receptor gene  
73 (*GHSR*) (Fig. 1a). *GHSROS* harbors a putative human-specific promoter in a transposable  
74 element<sup>3</sup>, a pattern frequently found in promoters of lncRNAs with high tissue specificity and  
75 low expression levels<sup>4,5</sup>. It is now appreciated that many lncRNAs are equivalent to classical  
76 oncogenes or tumor suppressors and drive similar transcriptional programs in diverse cancer  
77 types<sup>2</sup>. Indeed, our earlier study showed that *GHSROS* is overexpressed in lung cancer and  
78 that its forced overexpression increases migration in lung adenocarcinoma cells lines<sup>3</sup>. We  
79 speculated that *GHSROS* plays a role in other cancers. Prostate cancer is a disease diagnosed  
80 in nearly 1.5 million men worldwide annually<sup>6</sup>. Intriguing recent studies have revealed that,  
81 like breast cancer, prostate cancer is a heterogeneous disease with multiple molecular  
82 phenotypes<sup>7,8,9</sup>. The identification of genes that drive or mediate these distinct phenotypes is  
83 crucial. Although a number of lncRNAs have been reported in prostate cancer, few have been  
84 functionally characterized or assessed as therapeutic targets<sup>10</sup>. Here, we report that *GHSROS*  
85 is highly expressed in a subset of prostate tumors. We provide evidence that this lncRNA

86 reprograms prostate cancer cells toward a more aggressive phenotype, possibly by repressing  
87 the expression of the tumor suppressor PPP2R2C to allow androgen-independent growth.

88

## 89 **RESULTS**

### 90 ***GHSROS* is expressed in prostate cancer**

91 Microarrays and RNA-sequencing are commonly used to assess the expression of genes.

92 LncRNAs are often expressed at orders of magnitude lower than protein-coding transcripts,

93 however, making them difficult to detect<sup>5, 11,12,13,14,15</sup>. Interrogation of exon arrays harboring

94 four different strand-specific probes against *GHSROS* demonstrated that the lncRNA is

95 actively transcribed, although expressed at very low levels in cancer cell lines and tissues

96 (Supplementary Fig. S1), consistent with previous observations from Northern blotting and

97 RT-PCR experiments<sup>3</sup>. The low expression across the *GHSROS* and *GHSR* loci in RNA-seq

98 datasets is illustrated in Supplementary Fig. S2. Collectively, these data demonstrate that it is

99 not currently possible to detect *GHSROS* in public genome-wide gene expression datasets.

100

101 We next evaluated *GHSROS* expression in a qRT-PCR tissue array of 18 cancers. This

102 analysis revealed particularly high *GHSROS* expression in lung tumors, as previously

103 reported<sup>3</sup>, and elevated expression in prostate tumors (Fig. 1b). Analysis of additional

104 prostate tissue-derived cDNA arrays revealed that *GHSROS* could be detected in

105 approximately 41.7% of all normal prostate tissues ( $n=24$ ), 55.7% of tumors ( $n=88$ ), and

106 58.1% of other prostatic diseases (e.g. prostatitis;  $n=31$ ) (Supplementary Table S1). *GHSROS*

107 was highly expressed by a subset of prostate tumors ( $\sim 11.4\%$ ;  $Z$ -score  $>1$ ) (Fig. 1c) and

108 elevated in tumors with Gleason scores 8-10 (Supplementary Fig. S3; Supplementary Table

109 S1; Mann-Whitney-Wilcoxon test  $P=0.0021$ ). To expand on these observations, we examined

110 an independent cohort of eight normal prostate tissue specimens and 28 primary tumors with

111 high Gleason scores (18 of which had metastases at biopsy). Similarly, *GHSROS* expression  
112 was significantly elevated in tumors compared to normal prostate tissue (Mann-Whitney-  
113 Wilcoxon test,  $P=0.0070$ ) (Fig. 1d; Supplementary Fig. S4; Supplementary Table S2).

114

115 As the functional thresholds of long non-coding RNAs are difficult to gauge and likely cell-  
116 context specific<sup>16</sup>, we identified cell lines with a range of endogenous *GHSROS* expression.  
117 Compared to the RWPE-1 benign prostate-derived cell line, higher expression was observed  
118 in the PC3 ( $P=0.00040$ , Student's *t*-test) (Fig. 1e) and DuCaP prostate cancer cell lines  
119 ( $P=0.0024$ ), and expression was similar to RWPE-1 in the DU145 ( $P=0.29$ ) and LNCaP  
120 prostate cancer cell lines ( $P=0.49$ ). We also assessed the expression of *GHSROS* in patient-  
121 derived xenografts (PDXs). Compared to RWPE-1, *GHSROS* was significantly upregulated  
122 ( $P\leq 0.05$ ) in 4/6 of the LuCaP series of PDX lines<sup>17</sup> and in the BM18 femoral metastasis-  
123 derived androgen-responsive PDX line<sup>18</sup> ( $P=0.0005$ ) (Fig. 1e).

124

### 125 ***GHSROS* promotes growth and motility of prostate cancer cells *in vitro***

126 To gain insights into *GHSROS*, we assessed its function in three prostate-derived cell lines by  
127 stably overexpressing the lncRNA in PC3, DU145, and LNCaP cells (denoted PC3-  
128 *GHSROS*, DU145-*GHSROS*, and LNCaP-*GHSROS*) (Supplementary Fig. S5). Cell  
129 proliferation over 72 hours (measured by a xCELLigence real-time cell analysis instrument)  
130 was increased in PC3 ( $P=0.029$ , Student's *t*-test) and DU145 ( $P=0.026$ ) *GHSROS*-  
131 overexpressing cells (Fig. 2a). LNCaP cells did not attach well to the gold electrodes of the  
132 xCELLigence instrument (data not shown), and we therefore utilized a WST-1 assay to  
133 assess this cell line. Similar to PC3 and DU145 cells overexpressing *GHSROS*, proliferation  
134 was also increased in LNCaP-*GHSROS* cells at 72 hours ( $P=0.040$ ) (Fig. 2b). *GHSROS*  
135 overexpression also increased the rate of cell migration of PC3 ( $P=0.0064$ , Student's *t*-test),

136 DU145 ( $P=0.017$ ), and LNCaP cells ( $P=0.00020$ ) over 24 hours (Fig. 2c) (where LNCaP was  
137 assessed by a standard transwell migration assay; PC3 and DU145 by an xCELLigence  
138 instrument). To confirm the *in vitro* functional effects of *GHSROS*, we designed locked  
139 nucleic antisense oligonucleotides (LNA-ASOs) to strand-specifically silence endogenous  
140 *GHSROS* expression (Fig. 2d; Supplementary Fig. S6). Two LNA-ASOs targeting distinct  
141 regions of *GHSROS*, RNV124 and RNV104L, independently reduced the expression of  
142 *GHSROS* (percentage knockdown of ~63% and ~71%, respectively) in native PC3 cells 48  
143 hours post transfection compared to scrambled control ( $P=0.0002$  and  $P=0.0001$ , Student's *t*-  
144 test) (Fig. 2e). Moreover, *GHSROS* knockdown attenuated cell proliferation (RNV124,  
145  $P=0.049$ ; RNV104L,  $P=0.030$ ) (Fig. 2f) and migration of PC3 cells over 18 hours (RNV124,  
146  $P=0.0042$ ) (Fig. 2g) – the reciprocal effects observed when *GHSROS* was forcibly  
147 overexpressed.

148

#### 149 ***GHSROS* is associated with cell survival and resistance to the cytotoxic drug docetaxel**

150 Knockdown experiments also revealed that *GHSROS* protected PC3 prostate cancer cells  
151 from death by serum starvation (Supplementary Fig. S7). This observation led us to examine  
152 whether *GHSROS* contributes to cell survival following chemotherapy. The current treatment  
153 of choice for advanced, castration-resistant prostate cancer (CRPC; the fatal final stage of the  
154 disease) after the failure of hormonal therapy is the cytotoxic drug docetaxel, a semi-  
155 synthetic taxoid that induces cell cycle arrest. At the half maximal inhibitory concentration  
156 ( $IC_{50}$ ) of docetaxel (5 nM for LNCaP<sup>19</sup>), survival was significantly increased in *GHSROS*-  
157 overexpressing LNCaP cells ( $P\leq 0.05$ , Student's *t*-test) (Fig. 3a) after 96 hours. A similar, less  
158 pronounced response was observed in LNCaP cells treated with enzalutamide, a hormonal  
159 therapy used to target the androgen receptor in metastatic, castration-resistant tumors<sup>20</sup> (Fig.  
160 3a).

161  
162 Survival pathways are induced after docetaxel treatment in prostate cancer<sup>21,22</sup>, and  
163 resistance may develop after chemotherapy (acquired resistance) or exist in treatment-naïve  
164 patients (innate resistance)<sup>21</sup>. The pronounced survival following docetaxel treatment in  
165 *GHSROS*-overexpressing LNCaP cells led us to speculate that endogenous *GHSROS*  
166 expression also contributed to drug resistance. Docetaxel significantly increased *GHSROS*  
167 expression in native LNCaP and PC3 cells – in a dose-dependent manner and at  
168 concentrations both above and below their respective IC<sub>50</sub> values (Fig. 3b). The lncRNA was  
169 not differentially expressed in charcoal stripped serum (CSS), used to simulate androgen  
170 deprivation therapy, or following treatment with enzalutamide (Fig. 3c). In agreement with  
171 previous reports<sup>23,24</sup>, the gene coding for prostate specific antigen (PSA; *KLK3*) was  
172 downregulated by docetaxel and enzalutamide in LNCaP cells (-6.6-fold,  $P=0.00070$ ,  
173 Student's *t*-test) (Fig. 3c). Taken together, these data suggest that *GHSROS* mediates tumor  
174 survival and resistance to the cytotoxic chemotherapy docetaxel.

175

### 176 ***GHSROS* potentiates tumor growth *in vivo***

177 In order to firmly establish a role for *GHSROS* in tumor growth, we established subcutaneous  
178 *GHSROS*-overexpressing androgen-independent (PC3 and DU145) and androgen-responsive  
179 (LNCaP) cell line xenografts in NOD/SCIDIL2R $\gamma$  (NSG) mice. Subcutaneous graft sites  
180 allow easy implantation and monitoring of tumor growth (using calipers)<sup>25</sup> – ideal for  
181 exploring the role of a new gene such as *GHSROS* *in vivo*. Overexpression of *GHSROS* in  
182 xenografts was confirmed post-mortem by qRT-PCR (Supplementary Fig. S8). Compared to  
183 vector controls, xenograft tumor volumes were significantly greater at day 25 in PC3-  
184 *GHSROS* mice ( $P=0.0040$ , Mann-Whitney-Wilcoxon test) and at day 35 in DU145-  
185 *GHSROS* mice ( $P=0.0011$ ) (Fig. 4a). While xenograft tumors were not palpable in LNCaP-



186 GHSROS mice *in vivo*, tumors were significantly larger by weight post-mortem (at 72 days)  
187 ( $P=0.042$ , Student's *t*-test) (Fig. 4b) – with a size increase similar to that seen for DU145-  
188 GHSROS xenografts (Fig. 4c). LNCaP-GHSROS tumors invaded the muscle of the flank and  
189 the peritoneum (data not shown) and were more vascularized than control tumors (observed  
190 grossly and estimated by CD31<sup>+</sup> immunostaining) (Fig. 4d). Representative Ki67  
191 immunostaining for proliferating xenograft tumor cells is shown in Fig. 4e.

192

### 193 ***GHSROS* modulates the expression of cancer-associated genes**

194 Having established that *GHSROS* plays a role in regulating hallmarks of cancer – including  
195 cell proliferation, invasion, and migration<sup>26</sup> – we sought to determine the genes likely to  
196 mediate its function by examining the transcriptomes of cultured PC3 cells and LNCaP  
197 xenografts overexpressing this lncRNA.

198

199 High-throughput RNA-seq of cultured PC3-GHSROS cells (~50M reads) revealed that 400  
200 genes were differentially expressed (168 upregulated, 232 downregulated, moderated *t*-test;  
201 cutoff set at  $\log_2$  fold-change  $\pm 1.5$ ,  $Q \leq 0.05$ ) (Supplementary Table S3) compared with empty  
202 vector control cells. In support of our functional data, gene ontology analysis using DAVID  
203 showed enrichment for cancer, cell motility, cell migration, and regulation of growth  
204 (Supplementary Tables S4 and S5). Given that *GHSROS* is not readily detectable by high-  
205 throughput sequencing and array technologies, we queried the 400 genes differentially  
206 expressed in PC3-GHSROS cells using OncoPrint concept map analysis<sup>27</sup>. Enriched  
207 OncoPrint concepts included poor clinical outcome and metastatic progression (Fig. 5a;  
208 Supplementary Table S6).

209

210 Complementary lower-coverage (~30M reads) RNA-seq data from LNCaP-GHSROS  
211 xenografts demonstrated that a surprisingly large number of genes were differentially  
212 expressed (1 961 upregulated, 2 372 downregulated, moderated *t*-test; cutoff set at log<sub>2</sub> fold-  
213 change  $\pm 1.5$ ,  $Q \leq 0.05$ ) (Supplementary Dataset 1). Selected genes with low expression counts  
214 were validated by qRT-PCR (Supplementary Fig. S9). In LNCaP-GHSROS xenografts,  
215 *GHSROS*-regulated genes were enriched for the androgen response (gene set enrichment  
216 analysis; NES = 2.71,  $Q \leq 0.001$ ) (Fig. 5b), and included PSA (*KLK3*) (750.9-fold,  $Q = 3.6 \times$   
217  $10^{-6}$ ) and transmembrane protease serine 2 (*TMPRSS2*) (335.4-fold,  $Q = 4.5 \times 10^{-6}$ )  
218 (Supplementary Dataset 2). We also observed downregulation of numerous genes associated  
219 with cell migration and adhesion, epithelial–mesenchymal transition (EMT) (including  
220 *ZEB1*; -97.0-fold,  $Q = 1.5 \times 10^{-5}$ ), and angiogenesis and vasculature development  
221 (Supplementary Dataset 3). As mentioned above, subcutaneous LNCaP-GHSROS xenografts  
222 infiltrated muscle of the flank and the peritoneum and were more vascularized at 72 days post  
223 injection in NSG mice, which may indicate that these tumors had completed EMT and  
224 angiogenesis at this time.

225

226 It is appreciated that the bone metastasis-derived, androgen-independent PC3 and the lymph  
227 node metastasis-derived, androgen-responsive LNCaP prostate cancer cell lines represent  
228 genetically and presumably metabolically distinct subtypes<sup>28</sup>. They are therefore useful for  
229 revealing broad, functional gene expression changes associated with aggressive disease in  
230 forced overexpression and knockdown experiments. Despite the differences between these  
231 cell lines, a quarter (25.3%; 101 genes) of genes differentially expressed by PC3 cells  
232 overexpressing *GHSROS* were also differentially expressed by LNCaP-*GHSROS* cells (Fig.  
233 5c) ( $P = 0.000020$ , hypergeometric test). These genes represent candidate mediators of  
234 *GHSROS* function.

235

236 We interrogated the STRING database<sup>29</sup> to reveal protein interactions between the 101 genes  
237 regulated by *GHSROS* in both cell lines. A number of genes associated with cell-cell  
238 adhesion, migration, and growth were connected, indicating functional enrichment of these  
239 proteins in *GHSROS*-overexpressing prostate cancer cells (Fig. 5d). This included increased  
240 expression of epithelial cadherin (*CDHI*), occludin (*OCLN*), and claudin-7 (*CLDN7*); and  
241 decreased contactin 1 (*CNT1*), noggin (*NOG*), and transforming growth factor beta induced  
242 (*TGFBI*) in *GHSROS*-overexpressing cells. Of note, increased *CDHI* expression is associated  
243 with exit from EMT and growth of aggressive, metastatic prostate tumors<sup>25</sup>. A second,  
244 interesting upregulated network included anterior gradient 2 (*AGR2*) and trefoil factors 1 and  
245 2 (*TFF1* and *TFF2*). Trefoil factors are small proteins associated with mucin glycoproteins.  
246 Their expression is increased in castration-resistant prostate cancer (CRPC) and may  
247 facilitate the acquisition of hormone independence<sup>31, 32</sup>. Similarly, *AGR2* has been associated  
248 with the propensity of a number of aggressive tumor types to metastasize, including prostate  
249 cancer<sup>33, 34</sup>.

250

251 Ten out of the 101 genes were differentially expressed in metastatic tumors compared to  
252 primary tumors in two clinical prostate datasets: Grasso<sup>35</sup> (59 localized and 35 metastatic  
253 prostate tumors) and Taylor<sup>36</sup> (123 localized and 27 metastatic prostate tumors)  
254 (Supplementary Tables S7 and S8) ( $Q \leq 0.25$ , moderated *t*-test). *DIRAS1*, *FBXL16*, *TP53I11*,  
255 *TFF2*, and *ZNF467* were upregulated in both metastatic tumors and *GHSROS*-overexpressing  
256 PC3 and LNCaP cells, while *AASS*, *CHRD11*, *CNTN1*, *IFI16*, and *MUM1L1* were  
257 downregulated. We investigated whether the expression of these genes contributes to adverse  
258 disease outcome by assessing survival in two independent datasets: the Taylor dataset and  
259 TCGA-PRAD. The latter a dataset of localized prostate tumors generated by The Cancer

260 Genomics Atlas (TCGA) consortium<sup>37</sup>. As overall survival data was available for a small  
261 number of patients in these datasets, we assessed disease-free survival (relapse). Relapse is a  
262 suitable surrogate for overall survival in prostate cancer given that recurrence of disease  
263 would be expected to contribute significantly to mortality, and metastatic disease is incurable.  
264 Unsupervised *k*-means clustering was employed to divide each dataset into two groups based  
265 on gene expression alone. Two genes, zinc finger protein 467 (*ZNF467*; which was induced  
266 by forced *GHSROS*-overexpression) and chordin-like 1 (*CHRDLI*; which was repressed),  
267 correlated with relapse in both datasets (Supplementary Table S9). Chordin-like 1 is a  
268 negative regulator of bone morphogenetic protein 4-induced migration and invasion in breast  
269 cancer<sup>38</sup>. It was downregulated in *GHSROS*-overexpressing cell lines and in metastatic  
270 tumors compared to localized tumors in the Taylor and Grasso datasets. Interrogation of the  
271 Chandran prostate cancer dataset (60 localized tumors and 63 adjacent, normal prostate)<sup>39</sup>  
272 suggests that *CHRDLI* is downregulated by prostate tumors in general. *CHRDLI* expression  
273 stratified the Taylor ( $N=150$ ; 27 metastatic tumors) dataset into two groups with a significant,  
274 438-day difference in overall disease-free survival (relapse; Cox  $P=0.0062$ , absolute hazard  
275 ratio (HR) = 2.5). A statistically significant, yet clinically negligible difference in relapse (9  
276 days; Cox  $P=0.0071$ , absolute HR = 1.8) was observed in the TCGA-PRAD dataset ( $N=489$ ;  
277 no metastatic tumors) (Supplementary Table S9). Survival analysis *P*-values (Kaplan-Meier  
278 and Cox proportional-hazard) and hazard ratios indicate whether there is a significant  
279 difference between two groups, but not the degree of difference. Evaluating statistically  
280 significant differences in survival (e.g. in days) between groups is therefore subjective. Given  
281 these data, we propose that *CHRDLI* may play an important role in metastatic tumors.  
282  
283 In contrast to *CHRDLI*, *ZNF467* stratified patients into clusters with an obvious difference in  
284 overall median survival (relapse) between groups in both the Taylor (697 days; Cox

285  $P=0.0039$ , HR = 2.7) and TCGA-PRAD datasets (139 days; Cox  $P=0.000026$ , HR = 2.5)  
286 (Supplementary Table S9). *ZNF467* has not been functionally characterized, however, a  
287 recent study suggests that it is a transcription factor which clusters in close proximity to the  
288 androgen receptor in a network associated with breast cancer risk<sup>40</sup>, indicating that *ZNF467*  
289 and AR regulate similar pathways. Clustering of patients into groups of either low or high  
290 *ZNF467* expression revealed that elevated expression of the gene associated with a worse  
291 relapse outcome (Supplementary Fig. S10a-c). In agreement, *ZNF467* gene expression can  
292 distinguish low ( $\leq 6$ ) from high ( $\geq 8$ ) Gleason score prostate tumors in a Fred Hutchinson  
293 Cancer Research Center prostate cancer dataset (381 localized and 27 metastatic prostate  
294 tumors)<sup>41</sup>. *ZNF467* expression is also elevated in chemotherapy-resistant ovarian cancer<sup>42</sup> and  
295 breast cancer<sup>43</sup> cell lines.

296

297 The 101 *GHSROS*-regulated genes were visualized in a scatter plot to reveal genes with  
298 particularly distinct ( $\geq 8$ -fold) differential expression in *GHSROS*-overexpressing prostate  
299 cancer cell lines – putative fundamental drivers of the observed tumorigenic phenotypes. This  
300 revealed that *PPP2R2C* (Fig. 5e), a gene encoding a subunit of the holoenzyme phosphatase  
301 2A (PP2A)<sup>44,45</sup>, was downregulated by forced overexpression of *GHSROS*. In the PC3-  
302 *GHSROS* RNA-seq dataset, *PPP2R2C* was the third most downregulated gene (-29.9-fold,  
303 moderated  $t$ -test  $Q=3.4 \times 10^{-10}$ ) (Supplementary Table S3). Consistently, forced  
304 overexpression or knockdown of *GHSROS* in prostate cancer cell lines reciprocally regulated  
305 endogenous *PPP2R2C* expression (Fig. 5f; Supplementary Figs. S9 and S11).

306

307 We observed that *GHSROS* was also able to reciprocally regulate androgen receptor (*AR*)  
308 expression in some prostate cancer cell lines (downregulated upon *GHSROS* overexpression  
309 in PC3 and LNCaP; upregulated upon *GHSROS* knockdown in DUCaP) (Fig. 5f). LNCaP-

310 GHSROS xenografts showed a variable *AR* expression pattern, which may be linked to  
311 differences in available androgen, however, *PPP2R2C* expression was still significantly  
312 repressed *in vivo* (-3.7-fold, Student's *t*-test  $P=7.9 \times 10^{-3}$ ) (Supplementary Fig. S9). Similarly,  
313 while *AR* could not be detected in DU145 cells, *GHSROS*-overexpression decreased  
314 *PPP2R2C* expression in this cell line (Fig. 5f). The androgen receptor is also expressed by  
315 ovarian and lung cancer tumors and cell lines<sup>46,47</sup>. Forced overexpression of *GHSROS* in the  
316 A549 lung adenocarcinoma cell line decreased *AR* and *PPP2R2C* expression (Student's *t*-  
317 test,  $P \leq 0.0001$ ). *GHSROS* knockdown in the ES-2 ovarian clear cell carcinoma cell line,  
318 which does not express *PPP2R2C*, increased the expression of *AR* (Student's *t*-test,  $P=0.0029$   
319 and  $P=0.0022$ ) (Fig. 5f; Supplementary Fig. S11).

320

## 321 **DISCUSSION**

322 Very recent work suggests that a small proportion (~3%) of long non-coding RNA genes are  
323 dysregulated in tumors and mediate cell growth<sup>48</sup>. Herein, we demonstrate that the lncRNA  
324 *GHSROS* is one such gene. *GHSROS* expression is elevated across many different cancers,  
325 suggesting that it is a so-called pan-cancer lncRNA<sup>49,50</sup>. In prostate cancer *GHSROS* is  
326 detectable in normal tissue and expressed at higher levels in a subset (~10%) of tumors. We  
327 have yet to narrow down on particular prostate tumor strata with elevated *GHSROS*, however.

328

329 From assessing the function of *GHSROS* in immortalized prostate cancer cell lines, the  
330 following observations were made: Forced overexpression of *GHSROS* enhances *in vivo*  
331 tumor growth, and *in vitro* cell viability and motility. We also demonstrate that forced  
332 overexpression of *GHSROS* facilitates survival and recalcitrance to the cytotoxic  
333 chemotherapy drug docetaxel. Critically, we show that endogenous *GHSROS* is elevated  
334 following docetaxel treatment. Docetaxel is commonly prescribed for late-stage, metastatic

335 CRPC patients, but large, randomized trials suggest that it is also effective against recently-  
336 diagnosed, localized prostate tumors<sup>51</sup>. These data suggest that *GHSROS* acts as a cell  
337 survival factor in prostate cancer. While the underlying mechanisms are unknown, two genes  
338 associated with chemotherapy resistance, *ZNF467* and *PPP1R1B* (also known as *DARPP-*  
339 *32*), were upregulated in PC3 and LNCaP cells overexpressing *GHSROS*. *PPP1R1B* is a  
340 potent anti-apoptotic gene which confers resistance in cancer cell lines to several  
341 chemotherapeutic agents when overexpressed<sup>52</sup>.

342

343 The expression and function of *GHSROS* in prostate cancer suggests that it belongs to a  
344 growing list of lncRNAs that function as *bona fide* oncogenes. Notable examples associated  
345 with aggressive cancer and adverse outcomes include *HOTAIR* (HOX transcript antisense  
346 RNA), which is upregulated in a range of cancers<sup>2</sup>, and the prostate cancer-specific  
347 *SCHLAP1* (SWI/SNF Complex Antagonist Associated With Prostate Cancer 1)<sup>53</sup>. To better  
348 understand how *GHSROS* mediates its effects in prostate cancer, we examined transcriptomes  
349 of prostate cancer cell lines with forced *GHSROS* overexpression: PC3 cells in culture (*in*  
350 *vitro*) and subcutaneous LNCaP xenografts in mice (*in vivo*). The 101 common differentially  
351 expressed genes included several transcription factors with established roles in prostate  
352 cancer and genes associated with metastasis and poor prognosis. Our study not only  
353 highlights genes modulated by *GHSROS*, but also genes (such as *ZNF467*, *CHRD1*, and  
354 *PPP2R2C*) that may be generally relevant to prostate cancer progression.

355

356 Reactivation of the androgen receptor (*AR*) has long been considered a seminal event;  
357 supporting renewed tumor growth in a majority of metastatic CRPC patients<sup>54,55</sup>. However, it  
358 is now increasingly recognized that, similar to other endocrine-related cancers, several  
359 subtypes of prostate cancer exist<sup>7,8,9</sup>. These include subtypes characterized by androgen

360 pathway-independent growth<sup>44, 56</sup>. In this context, our results on *PPP2R2C*, a gene which  
361 encodes a PP2A substrate-binding regulatory subunit, is of interest. We demonstrate that  
362 *PPP2R2C* expression in prostate cancer cell lines is repressed by forced *GHSROS*  
363 overexpression and increased by *GHSROS* knockdown. There is emerging evidence that  
364 inactivation of PP2A mediates CRPC in a subset of patients who display resistance to AR-  
365 targeting therapies<sup>44, 45</sup>. Loss of *PPP2R2C* expression alone is thought to reprogram prostate  
366 tumors towards AR pathway-independent growth and survival<sup>44</sup>. Several independent lines of  
367 evidence suggest that *PPP2R2C* is a critical tumor suppressor involved in many cancers.  
368 Loss of *PPP2R2C* expression has been attributed to esophageal adenocarcinoma  
369 tumorigenesis<sup>57</sup>, and *PPP2R2C* downregulation by distinct microRNAs positively correlates  
370 with increased proliferation of cultured cancer cells derived from the prostate<sup>58</sup>,  
371 nasopharynx<sup>59</sup>, and ovary<sup>60</sup>. *PPP2R2C* also has a classical growth-inhibiting tumor  
372 suppressor role in brain cancers<sup>61</sup>. A subtype of medulloblastoma, pediatric brain tumors, are  
373 characterized by high expression of the chemokine receptor CXCR4 and concordant  
374 suppression of *PPP2R2C*<sup>62</sup>. Similarly, the gene is ablated in A2B5<sup>+</sup> glioma stem-like cells, a  
375 population which mediates a particularly aggressive chemotherapy-resistant glioblastoma  
376 phenotype<sup>63</sup>. Although seemingly paradoxical, *GHSROS* repression of *AR* and *PPP2R2C* in  
377 prostate cancer cell lines can be rationalized. Knockdown of *PPP2R2C* using small  
378 interfering RNA in cultured LNCaP and VCaP cells did not alter the expression of *AR*<sup>44</sup>. In  
379 contrast, *AR* knockdown in androgen-independent LP50 cells<sup>64</sup> (a cell line derived from  
380 LNCaP) markedly decreased *PPP2R2C* expression (Supplementary Fig. S12) – suggestive of  
381 an adaptive response to loss of androgen receptor expression (and function). Precisely how  
382 *GHSROS* mediates *PPP2R2C* downregulation and its effects on tumor growth remains to be  
383 determined, however, *GHSROS* is the first lncRNA shown to downregulate this critical tumor  
384 suppressor, suggesting a role in adaptive survival pathways and CRPC development. Taken



385 together, we speculate that *GHSROS* prime prostate tumors for androgen receptor-  
386 independent growth.

387

388 In this study, the growth of *GHSROS*-overexpressing prostate cancer cell lines was assessed  
389 using subcutaneous prostate cancer cell lines xenografts. We appreciate that other models  
390 (including orthotopic xenografts) are critical for firmly establishing roles for a gene in cancer  
391 processes, including invasion and metastasis<sup>25</sup>, and we will assess these in a future study. The  
392 interaction between *GHSROS* and genomic regions, proteins, and other RNA transcripts also  
393 requires further elucidation. While this study firmly establishes that *GHSROS* plays a role in  
394 prostate cancer, the mechanism by which it reprograms gene expression remains unknown.

395 LncRNAs are now considered critical components of the cellular machinery<sup>1</sup>. Unlike protein-  
396 coding genes, which typically require sequence conservation to maintain function, the  
397 mechanisms of action of lncRNAs are usually not obvious and uncovering their precise,  
398 sometimes subtle, function remains a challenge<sup>1</sup>. For example, some lncRNAs modulate the  
399 epigenetic regulation of gene expression and interact with chromatin, acting as scaffolds to  
400 guide other molecules (including RNA, proteins, and epigenetic enzymes) to influence gene  
401 expression<sup>1,2</sup>.

402

403 Although cancers are highly heterogeneous diseases and few therapies target molecular  
404 phenotypes, lncRNAs provide a largely untapped source for new molecular targets<sup>2</sup>. Here, we  
405 developed antisense oligonucleotides targeting *GHSROS* and assessed them in cultured  
406 cancer cells. We are in the process of refining our oligonucleotides for targeting *in vivo*  
407 xenografts. Targeting *GHSROS* may present an opportunity for clinical intervention,  
408 however, it is appreciated that translational and regulatory challenges exist for  
409 oligonucleotide therapies<sup>65</sup>.

410

411 In summary, we propose that *GHSROS* is an oncogene that regulates cancer hallmarks and  
412 the expression of a number of genes, including the tumor suppressor *PPP2R2C* – the loss of  
413 which is an emerging alternative driver of prostate cancer. Further studies are needed to  
414 elucidate the expression and function of *GHSROS* in more detail and to determine whether  
415 pharmacological targeting of this lncRNA could prove useful for treating cancer.

416

## 417 **MATERIALS AND METHODS**

### 418 **Assessment of *GHSROS* transcription in public high-throughput datasets**

419 To expand on Northern blot and qRT-PCR analyses which suggest that the lncRNA *GHSROS*  
420 is expressed at low levels<sup>3</sup>, we interrogated ~4,000 oligonucleotide microarrays with probes  
421 for known and predicted exons (Affymetrix GeneChip Exon 1.0 ST). For illustrative  
422 purposes, an RNA-sequencing dataset averaging ~160M reads from metastatic castration-  
423 resistant prostate cancer was also examined. See Supplementary information and  
424 Supplementary Table S10.

425

### 426 **Cell culture and treatments**

427 Prostate-derived cell lines (PC3, DU145, LNCaP, C4-2B<sup>66</sup>, 22Rv1, DUCaP<sup>67</sup>, RWPE-1, and  
428 RWPE-2), the ES-2 ovarian cancer cell line, and the A549 lung cancer cell line were obtained  
429 from ATCC (Rockville, MD, USA), except where indicated by a reference. See  
430 Supplementary information for details.

431

### 432 **Patient-derived xenografts**

433 Patient-derived xenograft (PDX) lines were obtained in-house (see Supplementary  
434 information).

435 **Production of *GHSROS* overexpressing cancer cell lines**

436 See Supplementary information for details.

437

438 **RNA extraction, reverse transcription, and quantitative reverse transcription**

439 **Polymerase Chain Reaction (qRT-PCR)**

440 See Supplementary information for details. Primers are listed in Supplementary Table S11.

441

442 **Locked Nucleic Acid-Antisense Oligonucleotides (LNA-ASO)**

443 Two distinct LNA ASOs complementary to different regions of *GHSROS*, RNV104L and  
444 RNV124 (see Supplementary Fig. S6), were designed in-house (by R.N.V.) and synthesized  
445 commercially (Exiqon, Vedbæk, Denmark). See Supplementary information for details.

446

447 ***In vitro* cell assays**

448 Proliferation and migration assays were performed using an xCELLigence real-time cell  
449 analyzer (RTCA) DP instrument (ACEA Biosciences, San Diego, CA). Cell viability was  
450 assessed using a WST-1 cell proliferation assay (Roche, Nonnenwald, Penzberg, Germany).

451 See Supplementary information for details.

452

453 **Mouse subcutaneous *in vivo* xenograft models**

454 PC3, DU145, and LNCaP cells overexpressing *GHSROS* (or empty vector control) were  
455 injected subcutaneously into the flank of 4-week-old male NSG mice (obtained from Animal  
456 Resource Centre, Murdoch, WA, Australia). All mouse studies were carried out with approval  
457 from the University of Queensland and the Queensland University of Technology Animal  
458 Ethics Committees performed in accordance with relevant guidelines and regulations. See  
459 Supplementary information for details.

460 **RNA-sequencing of *GHSROS* overexpressing PC3 and LNCaP cells**

461 See Supplementary information for details. Raw and processed RNA-sequencing  
462 (transcriptome) data have been deposited in Gene Expression Omnibus (GEO) with the  
463 accession codes GSE86097 (*GHSROS* overexpression in cultured PC3 cells) and GSE103320  
464 (*GHSROS* overexpression in LNCaP xenografts).

465

466 **LP50 prostate cancer cell line *AR* knockdown microarray**

467 We interrogated microarray data (NCBI GEO accession no. GSE22483) from androgen-  
468 independent late passage LNCaP cells (LP50) subjected to androgen receptor (*AR*)  
469 knockdown by shRNA<sup>64</sup>. See Supplementary information for details.

470

471 **Survival analysis in clinical gene expression datasets**

472 Non-hierarchical  $k$ -means clustering was used to partition patients into groups ( $k=2$ ) of  
473 samples with similar gene expression patterns. Kaplan-Meier and Cox proportional-hazard  
474 model were utilized to generate survival probabilities and hazard ratios (HRs). See  
475 Supplementary information for details.

476

477 **Code**

478 Code is available in a repository at [https://github.com/sciseim/GHSROS\\_MS](https://github.com/sciseim/GHSROS_MS).

479

480 **CONFLICT OF INTEREST**

481 The author(s) declare no competing interests.

482

483

484

485 **ACKNOWLEDGEMENTS**

486 This work was supported by the National Health and Medical Research Council Australia  
487 (1002255 and 1059021; to P.L.J., A.C.H., L.K.C., and I.S.), the Cancer Council Queensland  
488 (1098565; to A.C.H., R.N.V., L.K.C., and I.S.), the Australian Research Council (grant no  
489 DP140100249; to A.C.H., and L.K.C.), a QUT Vice-Chancellor’s Senior Research  
490 Fellowship (to I.S.), the Movember Foundation and the Prostate Cancer Foundation of  
491 Australia through a Movember Revolutionary Team Award, the Australian Government  
492 Department of Health, and the Australian Prostate Cancer Research Center, Queensland  
493 (L.K.C., A.C.H., J. H. G., E.D.W., and C.C.N.), Queensland University of Technology, the  
494 Instituto de Salud Carlos III (co-funded by European Union ERDF/ESF, “Investing in your  
495 future” grant no. PI13-00651; to R.M.L.), a Miguel Servet grant (CP15/00156; to M.D.G.),  
496 Junta de Andalucía (grant no. BIO-0139 to R.M.L.), and CIBERobn (CIBER is an initiative  
497 of Instituto de Salud Carlos III, Ministerio de Sanidad, Servicios Sociales e Igualdad, Spain;  
498 to R.M.L.). We acknowledge the use of the high-performance computational facilities at the  
499 Queensland University of Technology and the technical assistance of the Translational  
500 Research Institute Histology core and Biological Resource Facility.

501

502 **AUTHOR CONTRIBUTIONS**

503 PBT, IS, PLJ and LKC conceived and designed the study, and interpreted the data. PBT,  
504 MM, MDG, CW, LJ and PLJ performed laboratory experiments. IS and PBT performed  
505 computational biology analyses. PBT, LKC, PLJ and IS wrote the article. All authors (PBT,  
506 PLJ, MDG, EJW, CW, MM, LJ, JHG, EDW, CCN, RML, RNV, LKC and IS) contributed to  
507 the conception and design of the study, interpretation of the data and writing of the  
508 manuscript.

509

## 510 REFERENCES

- 511 1 Mattick J.S., Rinn J.L. Discovery and annotation of long noncoding RNAs. *Nat Struct*  
512 *Mol Biol* 2015; **22**: 5-7.
- 513 2 Huarte M. The emerging role of lncRNAs in cancer. *Nat Med* 2015; **21**: 1253-1261.
- 514 3 Whiteside E.J. *et al.* Identification of a long non-coding RNA gene, growth hormone  
515 secretagogue receptor opposite strand, which stimulates cell migration in non-small  
516 cell lung cancer cell lines. *Int J Oncol* 2013; **43**: 566-574.
- 517 4 Saxonov S., Berg P., Brutlag D.L. A genome-wide analysis of CpG dinucleotides in  
518 the human genome distinguishes two distinct classes of promoters. *Proc Natl Acad*  
519 *Sci U S A* 2006; **103**: 1412-1417.
- 520 5 Derrien T. *et al.* The GENCODE v7 catalog of human long noncoding RNAs:  
521 analysis of their gene structure, evolution, and expression. *Genome Res* 2012; **22**:  
522 1775-1789.
- 523 6 Fitzmaurice C. *et al.* The Global Burden of Cancer 2013. *JAMA Oncol* 2015; **1**: 505-  
524 527.
- 525 7 Tosoian J.J., Antonarakis E.S. Molecular heterogeneity of localized prostate cancer:  
526 more different than alike. *Transl Cancer Res* 2017; **6**: S47-S50.
- 527 8 Shoag J., Barbieri C.E. Clinical variability and molecular heterogeneity in prostate  
528 cancer. *Asian J Androl* 2016; **18**: 543-548.
- 529 9 Dagogo-Jack I., Shaw A.T. Tumour heterogeneity and resistance to cancer therapies.  
530 *Nat Rev Clin Oncol* 2018; **15**: 81-94.
- 531 10 Mouraviev V. *et al.* Clinical prospects of long noncoding RNAs as novel biomarkers  
532 and therapeutic targets in prostate cancer. *Prostate Cancer Prostatic Dis* 2016; **19**:  
533 14-20.
- 534 11 Ruiz-Orera J., Messeguer X., Subirana J.A., Alba M.M. Long non-coding RNAs as a  
535 source of new peptides. *eLife* 2014; **3**: e03523.
- 536 12 Kutter C. *et al.* Rapid turnover of long noncoding RNAs and the evolution of gene  
537 expression. *PLoS Genet* 2012; **8**: e1002841.
- 538 13 Cabili M.N. *et al.* Integrative annotation of human large intergenic noncoding RNAs  
539 reveals global properties and specific subclasses. *Genes Dev* 2011; **25**: 1915-1927.
- 540 14 Necsulea A. *et al.* The evolution of lncRNA repertoires and expression patterns in  
541 tetrapods. *Nature* 2014; **505**: 635-640.
- 542 15 Wang K.C. *et al.* A long noncoding RNA maintains active chromatin to coordinate  
543 homeotic gene expression. *Nature* 2011; **472**: 120-124.
- 544 16 Geisler S., Collier J. RNA in unexpected places: long non-coding RNA functions in  
545 diverse cellular contexts. *Nat Rev Mol Cell Biol* 2013; **14**: 699-712.

- 546 17 Nguyen H.M. *et al.* LuCaP Prostate Cancer Patient-Derived Xenografts Reflect the  
547 Molecular Heterogeneity of Advanced Disease and Serve as Models for Evaluating  
548 Cancer Therapeutics. *Prostate* 2017; **77**: 654-671.
- 549 18 McCulloch D.R., Opeskin K., Thompson E.W., Williams E.D. BM18: A novel  
550 androgen-dependent human prostate cancer xenograft model derived from a bone  
551 metastasis. *Prostate* 2005; **65**: 35-43.
- 552 19 Komura K. *et al.* Resistance to docetaxel in prostate cancer is associated with  
553 androgen receptor activation and loss of KDM5D expression. *Proc Natl Acad Sci U S*  
554 *A* 2016; **113**: 6259-6264.
- 555 20 Drake C.G., Sharma P., Gerritsen W. Metastatic castration-resistant prostate cancer:  
556 new therapies, novel combination strategies and implications for immunotherapy.  
557 *Oncogene* 2014; **33**: 5053-5064.
- 558 21 Sonpavde G., Wang C.G., Galsky M.D., Oh W.K, Armstrong A.J. Cytotoxic  
559 chemotherapy in the contemporary management of metastatic castration-resistant  
560 prostate cancer (mCRPC). *BJU Int* 2015; **116**: 17-29.
- 561 22 Chandrasekar T., Yang J.C., Gao A.C., Evans C.P. Mechanisms of resistance in  
562 castration-resistant prostate cancer (CRPC). *Transl Androl Urol* 2015; **4**: 365-380.
- 563 23 Lee H.Y. *et al.* Clinical predictor of survival following docetaxel-based  
564 chemotherapy. *Oncol Lett* 2014; **8**: 1788-1792.
- 565 24 Tran C. *et al.* Development of a second-generation antiandrogen for treatment of  
566 advanced prostate cancer. *Science* 2009; **324**: 787-790.
- 567 25 Lin D. *et al.* Next generation patient-derived prostate cancer xenograft models. *Asian*  
568 *J Androl* 2014; **16**: 407-412.
- 569 26 Hanahan D., Weinberg R.A. Hallmarks of cancer: the next generation. *Cell* 2011;  
570 **144**: 646-674.
- 571 27 Rhodes D.R. *et al.* Oncomine 3.0: genes, pathways, and networks in a collection of  
572 18,000 cancer gene expression profiles. *Neoplasia* 2007; **9**: 166-180.
- 573 28 Seim I., Jeffery P.L., Thomas P.B., Nelson C.C., Chopin L.K. Whole-genome  
574 sequence of the metastatic PC3 and LNCaP human prostate cancer cell lines. *G3*  
575 *(Bethesda)* 2017; **7**: 1731-1741.
- 576 29 Szklarczyk D. *et al.* The STRING database in 2017: quality-controlled protein-protein  
577 association networks, made broadly accessible. *Nucleic Acids Res* 2017; **45**: D362-  
578 D368.
- 579 30 Putzke A.P. *et al.* Metastatic progression of prostate cancer and e-cadherin regulation  
580 by ZEB1 and SRC family kinases. *Am J Pathol* 2011; **179**: 400-410.
- 581 31 Legrier M.E. *et al.* Mucinous differentiation features associated with hormonal escape  
582 in a human prostate cancer xenograft. *Br J Cancer* 2004; **90**: 720-727.

- 583 32 Vestergaard E.M., Borre M., Poulsen S.S., Nexø E., Tørring N. Plasma levels of  
584 trefoil factors are increased in patients with advanced prostate cancer. *Clin Cancer*  
585 *Res* 2006; **12**: 807-812.
- 586 33 Kani K. *et al.* Anterior gradient 2 (AGR2): blood-based biomarker elevated in  
587 metastatic prostate cancer associated with the neuroendocrine phenotype. *Prostate*  
588 2013; **73**: 306-315.
- 589 34 Zweitzig D.R., Smirnov D.A., Connelly M.C., Terstappen L.W., O'Hara S.M., Moran  
590 E. Physiological stress induces the metastasis marker AGR2 in breast cancer cells.  
591 *Mol Cell Biochem* 2007; **306**: 255-260.
- 592 35 Grasso C.S. *et al.* The mutational landscape of lethal castration-resistant prostate  
593 cancer. *Nature* 2012; **487**: 239-243.
- 594 36 Taylor B.S. *et al.* Integrative genomic profiling of human prostate cancer. *Cancer Cell*  
595 2010; **18**: 11-22.
- 596 37 Cancer Genome Atlas Research Network. The Molecular Taxonomy of Primary  
597 Prostate Cancer. *Cell* 2015; **163**: 1011-1025.
- 598 38 Cyr-Depauw C. *et al.* Chordin-Like 1 suppresses bone morphogenetic protein 4-  
599 induced breast cancer cell migration and invasion. *Mol Cell Biol* 2016; **36**: 1509-  
600 1525.
- 601 39 Chandran U.R., Dhir R., Ma C., Michalopoulos G., Becich M., Gilbertson J.  
602 Differences in gene expression in prostate cancer, normal appearing prostate tissue  
603 adjacent to cancer and prostate tissue from cancer free organ donors. *BMC Cancer*  
604 2005; **5**: 45.
- 605 40 Castro M.A. *et al.* Regulators of genetic risk of breast cancer identified by integrative  
606 network analysis. *Nat Genet* 2016; **48**: 12-21.
- 607 41 Jhun M.A. *et al.* Gene expression signature of Gleason score is associated with  
608 prostate cancer outcomes in a radical prostatectomy cohort. *Oncotarget* 2017; **8**:  
609 43035-43047.
- 610 42 Zhu L., Hu Z., Liu J., Gao J., Lin B. Gene expression profile analysis identifies  
611 metastasis and chemoresistance-associated genes in epithelial ovarian carcinoma  
612 cells. *Med Oncol* 2015; **32**: 426.
- 613 43 Davies G.F. *et al.* TFPI1 mediates resistance to doxorubicin in breast cancer cells by  
614 inducing a hypoxic-like response. *PLoS One* 2014; **9**: e84611.
- 615 44 Bluemn E.G. *et al.* PPP2R2C loss promotes castration-resistance and is associated  
616 with increased prostate cancer-specific mortality. *Mol Cancer Res* 2013; **11**: 568-578.
- 617 45 Gonzalez-Alonso P., Cristobal I., Manso R., Madoz-Gurpide J., Garcia-Foncillas J.,  
618 Rojo F.. PP2A inhibition as a novel therapeutic target in castration-resistant prostate  
619 cancer. *Tumour Biol* 2015; **36**: 5753-5755.
- 620 46 Zhu H., Zhu X., Zheng L., Hu X., Sun L., Zhu X. The role of the androgen receptor in  
621 ovarian cancer carcinogenesis and its clinical implications. *Oncotarget* 2017; **8**:  
622 29395-29405.



- 623 47 Harlos C., Musto G., Lambert P., Ahmed R., Pitz M.W. Androgen pathway  
624 manipulation and survival in patients with lung cancer. *Horm Cancer* 2015; **6**: 120-  
625 127.
- 626 48 Liu S.J. *et al.* CRISPRi-based genome-scale identification of functional long  
627 noncoding RNA loci in human cells. *Science* 2017; **355**.
- 628 49 Chiu H.S. *et al.* Pan-Cancer Analysis of lncRNA Regulation Supports Their Targeting  
629 of Cancer Genes in Each Tumor Context. *Cell Rep* 2018; **3**: 297-312.
- 630 50 Cabanski C.R. *et al.* Pan-cancer transcriptome analysis reveals long noncoding RNAs  
631 with conserved function. *RNA Biol* 2015; **12**: 628-642.
- 632 51 Puente J., Grande E., Medina A., Maroto P., Lainez N., Arranz J.A. Docetaxel in  
633 prostate cancer: a familiar face as the new standard in a hormone-sensitive setting.  
634 *Ther Adv Med Oncol* 2017; **9**: 307-318.
- 635 52 Belkhiri A., Zhu S., El-Rifai W. DARPP-32: from neurotransmission to cancer.  
636 *Oncotarget* 2016; **7**: 17631-17640.
- 637 53 Prensner J.R. *et al.* The long noncoding RNA SChLAP1 promotes aggressive prostate  
638 cancer and antagonizes the SWI/SNF complex. *Nat Genet* 2013; **45**: 1392-1398.
- 639 54 Ferraldeschi R., Welti J., Luo J., Attard G., de Bono J.S. Targeting the androgen  
640 receptor pathway in castration-resistant prostate cancer: progresses and prospects.  
641 *Oncogene* 2015; **34**: 1745-1757.
- 642 55 Wyatt A.W., Gleave M.E. Targeting the adaptive molecular landscape of castration-  
643 resistant prostate cancer. *EMBO Mol Med* 2015; **7**: 878-894.
- 644 56 Bluemn E.G. *et al.* Androgen receptor pathway-independent prostate cancer is  
645 sustained through FGF signaling. *Cancer Cell* 2017; **32**: 474-489.
- 646 57 Peng D. *et al.* Integrated molecular analysis reveals complex interactions between  
647 genomic and epigenomic alterations in esophageal adenocarcinomas. *Sci Rep* 2017; **7**:  
648 40729.
- 649 58 Bi D., Ning H., Liu S., Que X., Ding K. miR-1301 promotes prostate cancer  
650 proliferation through directly targeting PPP2R2C. *Biomed Pharmacother* 2016; **81**:  
651 25-30.
- 652 59 Yan L., Cai K., Liang J., Liu H., Liu Y., Gui J. Interaction between miR-572 and  
653 PPP2R2C, and their effects on the proliferation, migration, and invasion of  
654 nasopharyngeal carcinoma (NPC) cells. *Biochem Cell Biol* 2017; **95**: 578-584.
- 655 60 Wu A.H. *et al.* miR-572 prompted cell proliferation of human ovarian cancer cells by  
656 suppressing PPP2R2C expression. *Biomed Pharmacother* 2016; **77**: 92-97.
- 657 61 Fan Y.L., Chen L., Wang J., Yao Q., Wan J.Q. Over expression of PPP2R2C inhibits  
658 human glioma cells growth through the suppression of mTOR pathway. *FEBS Lett*  
659 2013; **587**: 3892-3897.
- 660 62 Sengupta R. *et al.* CXCR4 activation defines a new subgroup of Sonic hedgehog-  
661 driven medulloblastoma. *Cancer Res* 2012; **72**: 122-132.

- 662 63 Auvergne R.M. *et al.* Transcriptional differences between normal and glioma-derived  
663 glial progenitor cells identify a core set of dysregulated genes. *Cell Rep* 2013; **3**:  
664 2127-2141.
- 665 64 Gonit M. *et al.* Hormone depletion-insensitivity of prostate cancer cells is supported  
666 by the AR without binding to classical response elements. *Mol Endocrinol* 2011; **25**:  
667 621-634.
- 668 65 Stein C.A., Castanotto D. FDA-Approved Oligonucleotide Therapies in 2017. *Mol*  
669 *Ther* 2017; **25**: 1069-1075.
- 670 66 Thalmann G.N. *et al.* Androgen-independent cancer progression and bone metastasis  
671 in the LNCaP model of human prostate cancer. *Cancer Res* 1994; **54**: 2577-2581.
- 672 67 Lee Y.G., Korenchuk S., Lehr J., Whitney S., Vessela R., Pienta K.J. Establishment  
673 and characterization of a new human prostatic cancer cell line: DuCaP. *In Vivo* 2001;  
674 **15**: 157-162.

675

## 676 FIGURES

677 **Figure 1.** Overview of the lncRNA *GHSROS* and its expression in cancer. **(a)** Overview of  
678 the *GHSR* and *GHSROS* gene loci. *GHSR* exons (black), *GHSROS* exon (red), repetitive  
679 elements (orange), introns (lines). **(b)** *GHSROS* expression in 19 cancers (TissueScan Cancer  
680 Survey Tissue qPCR panel). N (black) denotes normal tissue; T tumor (red). For each cancer,  
681 data are expressed as mean fold change using the comparative  $2^{-\Delta\Delta C_t}$  method against a non-  
682 malignant control tissue. Normalized to  $\beta$ -actin (*ACTB*). **(c)** Relative gene expression of  
683 *GHSROS* in OriGene cDNA panels of tissues from normal prostate ( $n=24$ ; blue), primary  
684 prostate cancer ( $n=88$ ; red), and other prostatic diseases ( $n=31$ ; orange). Determined by qRT-  
685 PCR, normalized to ribosomal protein L32 (*RPL32*), and represented as standardized  
686 expression values (*Z*-scores). **(d)** *GHSROS* expression in an Andalusian Biobank prostate  
687 tissue cohort. Absolute expression levels were determined by qRT-PCR and adjusted by a  
688 normalization factor calculated from the expression levels of three housekeeping genes  
689 (*HPRT*, *ACTB*, and *GAPDH*). NP denotes non-malignant prostate. \* $P \leq 0.05$ , Mann-Whitney-  
690 Wilcoxon test. **(e)** Expression of *GHSROS* in immortalized, cultured cell lines and patient-  
691 derived xenograft (PDX) lines. Mean  $\pm$  s.e.m. ( $n=3$ ). \* $P \leq 0.05$ , \*\* $P \leq 0.01$ , \*\*\* $P \leq 0.001$ ,

692 Student's *t*-test. Normalized as in (b) to the RWPE-1 non-malignant cell line. Androgen-  
693 independent lines are labeled in orange.

694

695 **Figure 2.** *GHSROS* promotes human prostate cancer cell line growth and motility *in vitro*. (a),  
696 b) Increased proliferation by *GHSROS*-overexpressing cells. PC3 and DU145 cells were  
697 assessed using an xCELLigence real-time cell analyzer for 72 hours; LNCaP using a WST-1  
698 assay at 72 hours. Vector denotes empty control plasmid. Mean  $\pm$  s.e.m. ( $n=3$ ). \* $P\leq 0.05$ ,  
699 \*\* $P\leq 0.01$ , \*\*\* $P\leq 0.001$ , Student's *t*-test. (c) Increased migration by *GHSROS*-overexpressing  
700 cells. PC3 and DU145 cells were assessed using an xCELLigence real-time cell analyzer for  
701 24 hours; LNCaP using a transwell assay (at 24 hours;  $n=3$ ). Parameters and annotations as in  
702 (a). (d) *GHSROS* RNA secondary structure prediction. The location of locked nucleic  
703 antisense oligonucleotides (LNA-ASOs) that target the lncRNA are shown in red. MFE  
704 denotes minimum free energy. (e) LNA ASOs reduced *GHSROS* expression by PC3 cells  
705 (measured 48 hours post-transfection). Fold-enrichment of *GHSROS* normalized to *RPL32*  
706 and compared to scrambled control ( $n=3$ ). Parameters and annotations as in (a). (f) *GHSROS*  
707 knockdown reduces PC3 proliferation ( $n=3$ ). Parameters and annotations as in (a). (g)  
708 *GHSROS* knockdown reduces PC3 migration. Left panel: representative plot of cell index  
709 impedance measurements from 0 to 20 hours after transfection of LNA-ASO RNV124 ( $n=3$ ).  
710 Right panel: RNV124 reduced cell migration at 18 hours ( $n=3$ ). Parameters and annotations  
711 as in (c).

712

713 **Figure 3.** *GHSROS* mediates cell survival and resistance to the cytotoxic drug docetaxel. (a)  
714 Viability of *GHSROS*-overexpressing LNCaP cells under different culture conditions. Cell  
715 number was assessed using WST-1. Cells were treated with enzalutamide (ENZ; 10  $\mu$ M) or  
716 docetaxel (DTX; 5 nM) for 96 hours and grown in either 2% FBS or 5% charcoal stripped

717 serum (CSS) RPMI-1640 media ( $n=3$ ). Mean  $\pm$  s.e.m.  $*P\leq 0.05$ ,  $***P\leq 0.001$ , Student's *t*-test.  
718 **(b)** *GHSROS* expression of native PC3 and LNCaP cells treated with docetaxel. Cells were  
719 grown in RPMI-1640 media with 2% FBS and treated with 1-20 nM docetaxel (DTX) for 48  
720 hours ( $n=3$ ). Fold-enrichment of *GHSROS* normalized to *RPL32* and compared to empty  
721 vector control. Parameters and annotations as in (a). **(c)** *GHSROS* and PSA (*KLK3*)  
722 expression of native LNCaP cells treated with ENZ (10  $\mu$ M in 2% FBS or 5% CSS RPMI-  
723 1640) or DTX (5 nM in 2% FBS RPMI-1640) for 48 hours ( $n=3$ ). Parameters and annotations  
724 as in (a).

725

726 **Figure 4.** *GHSROS* promotes human prostate cancer cell line growth *in vivo*. **(a)** Left panel:  
727 time course for PC3-*GHSROS* ( $n=8$ ) and vector control ( $n=4$ ) xenograft tumor volumes.  
728 Right panel: DU145-*GHSROS* ( $n=6$ ) and vector control ( $n=4$ ). Mean  $\pm$  s.e.m.  $*P\leq 0.05$ ,  
729  $**P\leq 0.01$ ,  $***P\leq 0.001$ , two-way ANOVA with Bonferonni's *post hoc* analysis. Tumors  
730 were measured with digital calipers. **(b)** Tumor weights of LNCaP (left panel; *GHSROS*-  
731 overexpressing  $n=9$ , vector  $n=8$ ) or DU145 (right panel; see (a)).  $*P\leq 0.05$ , Mann-Whitney-  
732 Wilcoxon test. **(c)** Size comparisons of DU145 (top panel) and LNCaP (bottom panel)  
733 xenografts overexpressing *GHSROS* or empty vector. **(d)** Representative morphology of  
734 LNCaP xenografts overexpressing *GHSROS* or empty vector. Tissue was stained with  
735 hematoxylin and eosin (H&E), Masson's Trichrome (MT; collagen; blue) and CD31  
736 (endothelial marker; brown immunoreactivity). Scale bar = 20  $\mu$ m. **(e)** Representative Ki67  
737 immunostaining of PC3 xenografts (top), DU145 xenografts (middle), and LNCaP xenografts  
738 (bottom). Scale=20  $\mu$ m.

739

740 **Figure 5.** *GHSROS* overexpression modulates the expression of cancer-associated genes. **(a)**  
741 Oncomine network representation of genes differentially expressed by cultured PC3-

742 GHSROS cells visualized using Cytoscape. Node sizes (gene overlap) reflect the number of  
743 genes per molecular concept. Nodes are colored according to concept categories indicated in  
744 the left corner. Edges connect enriched nodes (odds ratio  $\geq 3.0$ ) and darker edge shading  
745 indicates a higher odds ratio. **(b)** Gene set enrichment analysis (GSEA) of genes differentially  
746 expressed by LNCaP-GHSROS xenografts reveals enrichment for the androgen response.  
747 The normalized enrichment score (NES) and GSEA false-discovery corrected *P*-value (*Q*) are  
748 indicated. **(c)** Venn diagram of differentially expressed genes (DEG) in LNCaP-GHSROS  
749 and PC3-GHSROS cells. Symbols of 101 overlapping genes are indicated in text boxes. **(d)**  
750 Interaction of 101 genes differentially expressed in PC3-GHSROS and LNCaP-GHSROS  
751 cells (see (c)). Lines represent protein-protein interaction networks from the STRING  
752 database. Genes induced (red) or repressed (blue) by *GHSROS*-overexpression are indicated.  
753 **(e)** Gene expression scatter plot comparing *GHSROS*-overexpressing PC3 and LNCaP cells.  
754 Differentially expressed genes (DEGs) in both datasets shown in red (induced) and blue  
755 (repressed); of which  $\geq 8$ -fold ( $\log_2$  cutoff at -3 and 3) DEGs are highlighted by a green box.  
756 **(f)** Heat map of gene expression in *GHSROS*-perturbed cells. Each row shows the relative  
757 expression of a single gene and each column a sample (biological replicate). Fold-enrichment  
758 of each gene normalized to *RPL32* and compared to empty vector control (overexpression) or  
759 scrambled control (LNA-ASO knockdown). Fold-changes were  $\log_2$ -transformed and are  
760 displayed in the heat map as the relative expression of a gene in a sample compared to all  
761 other samples (*Z*-score).  
762

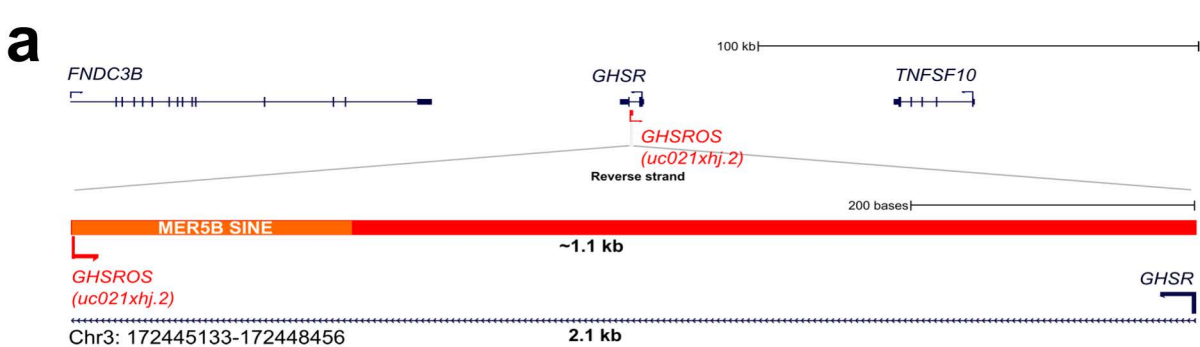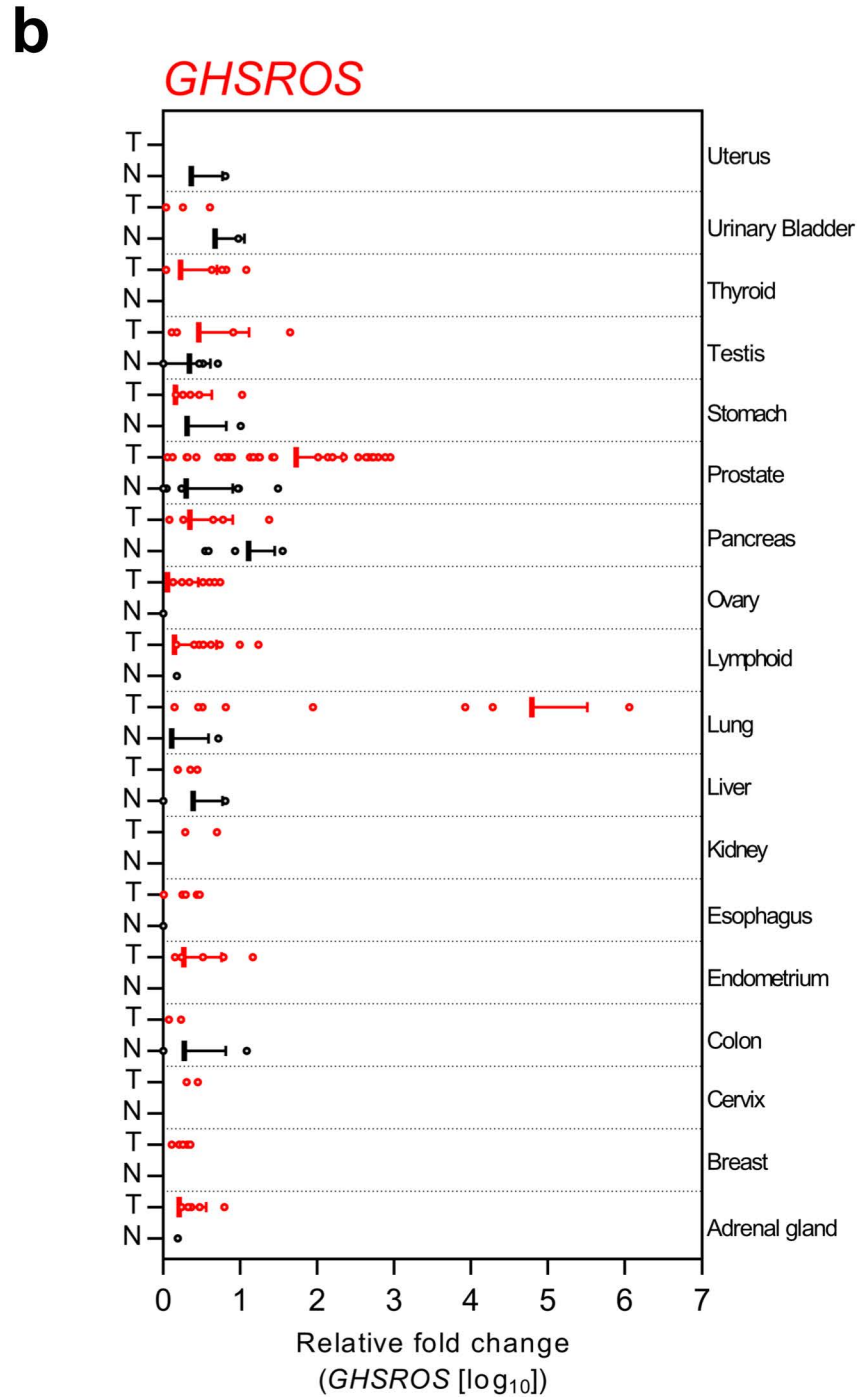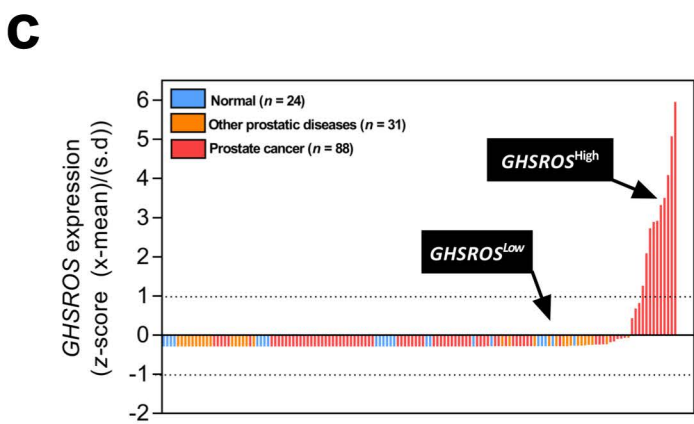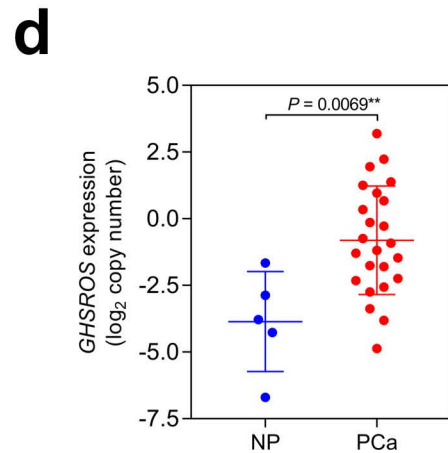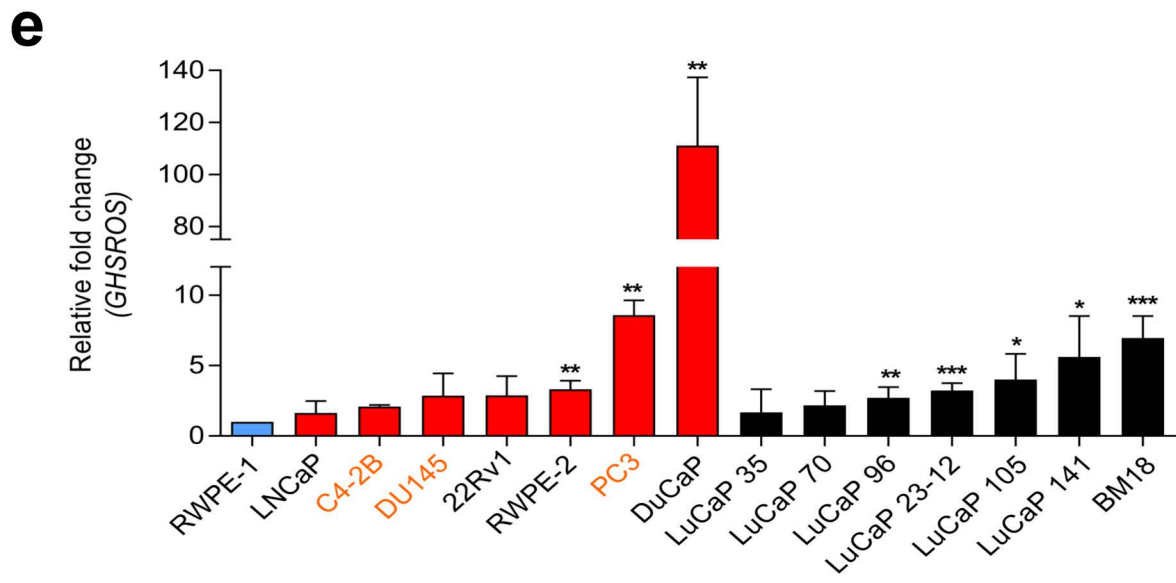

**a**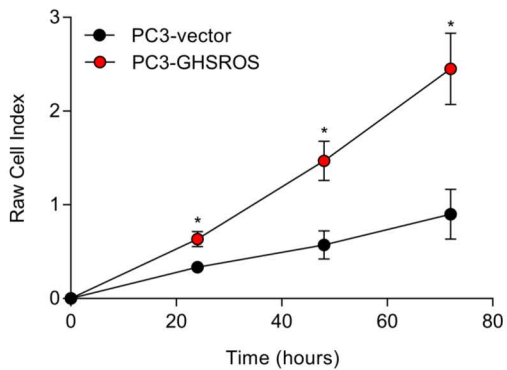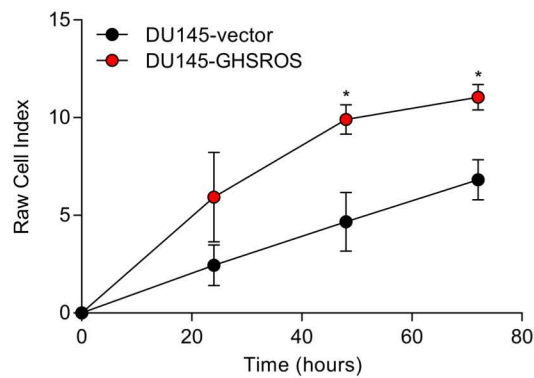**b**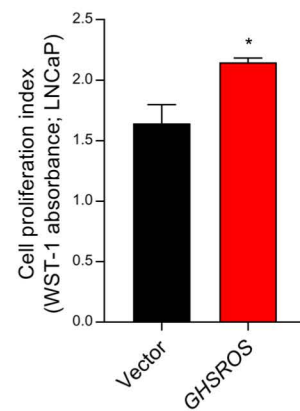**c**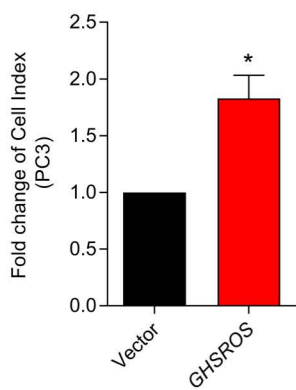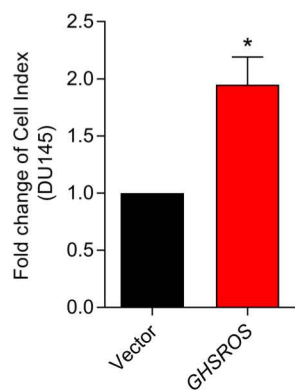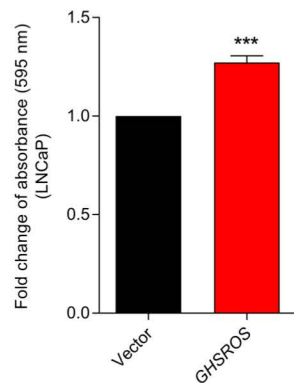**d**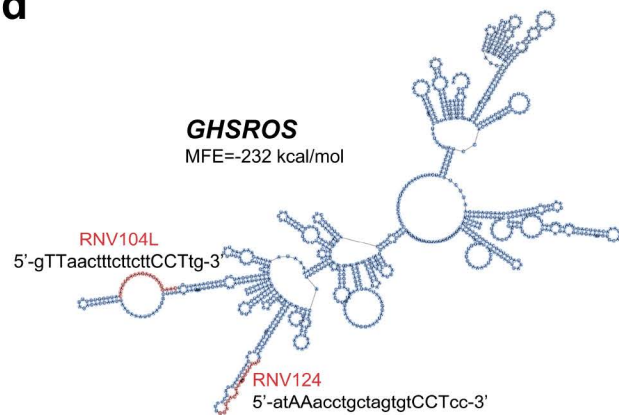**e**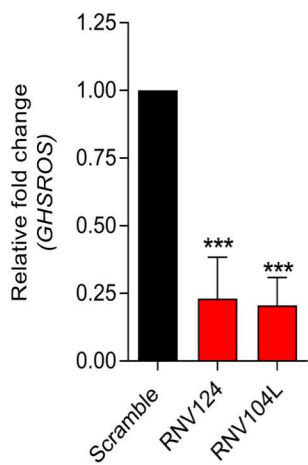**f**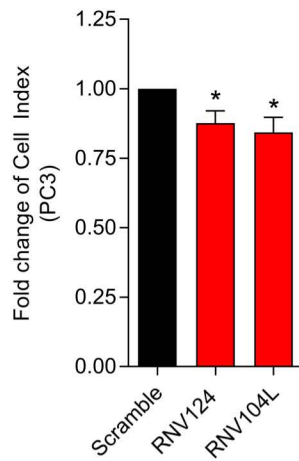**g**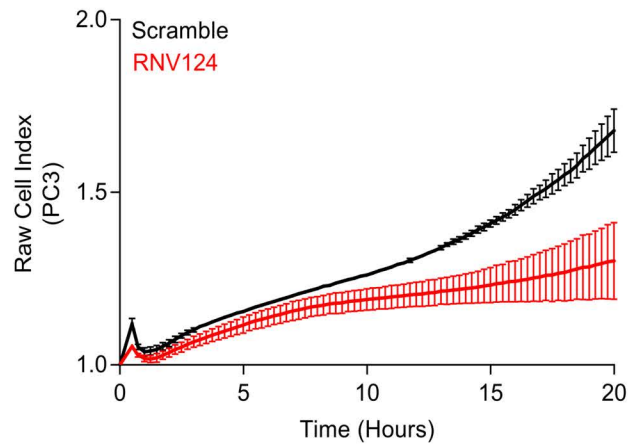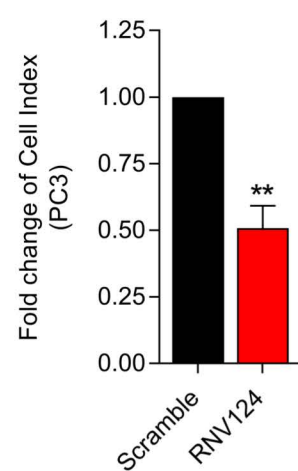

**a**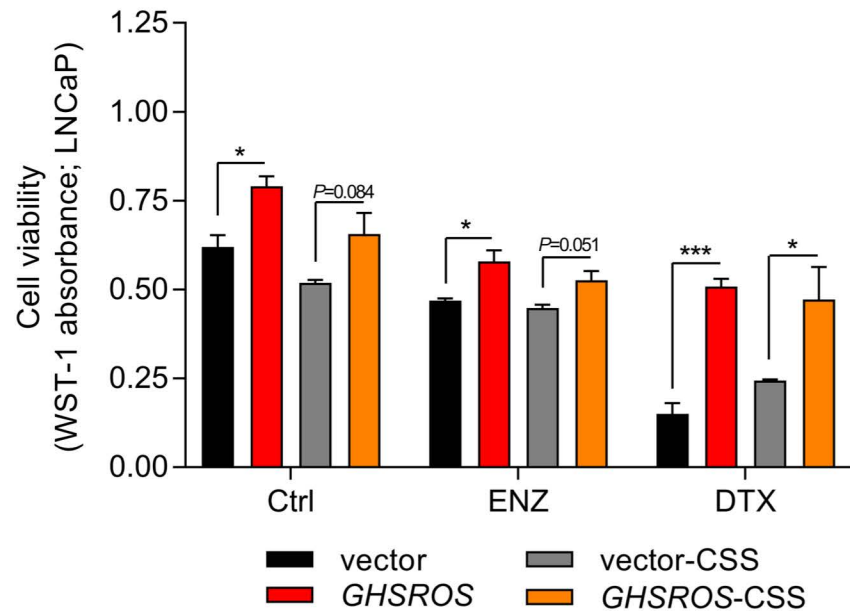**b**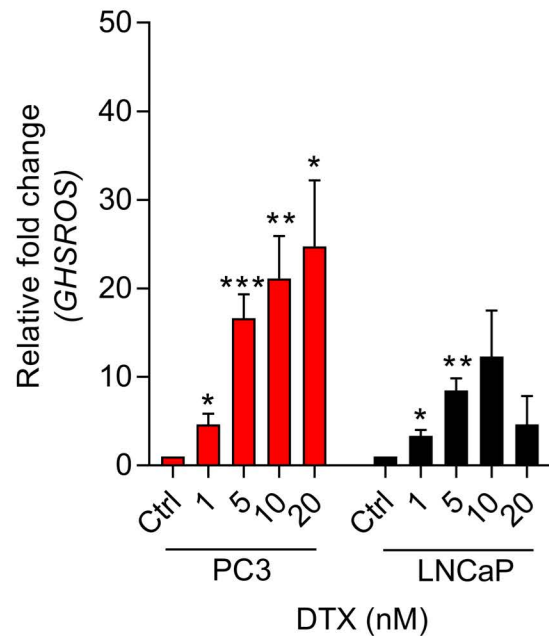**c**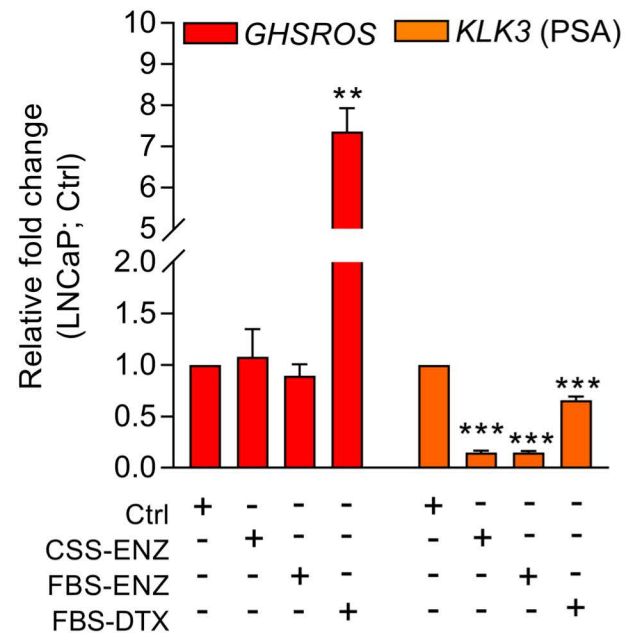



**a**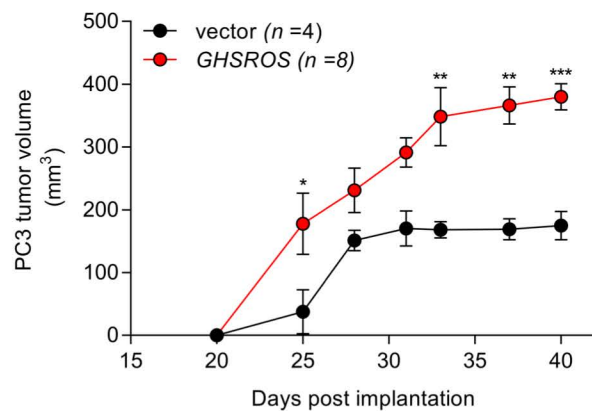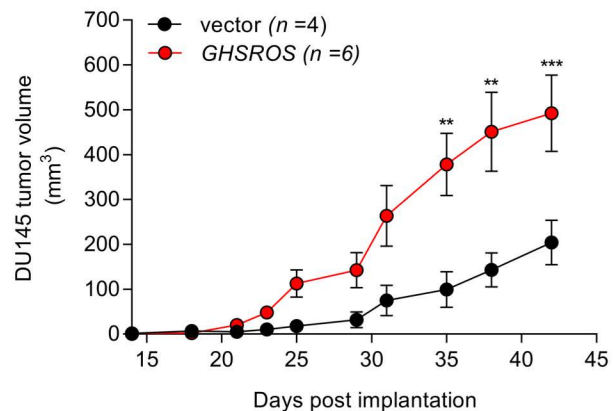**b**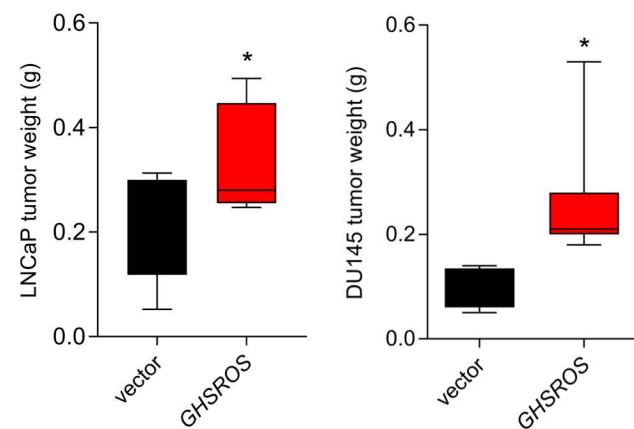**c**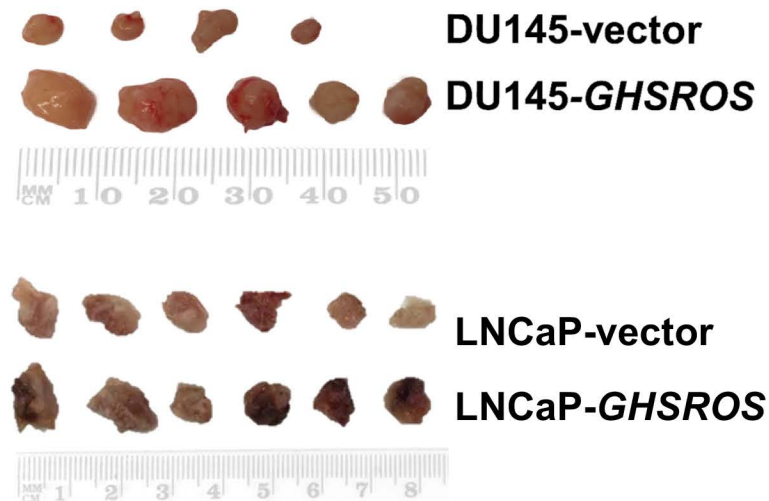**d**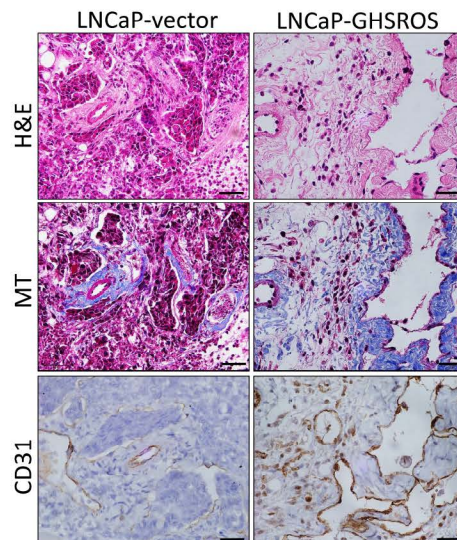**e**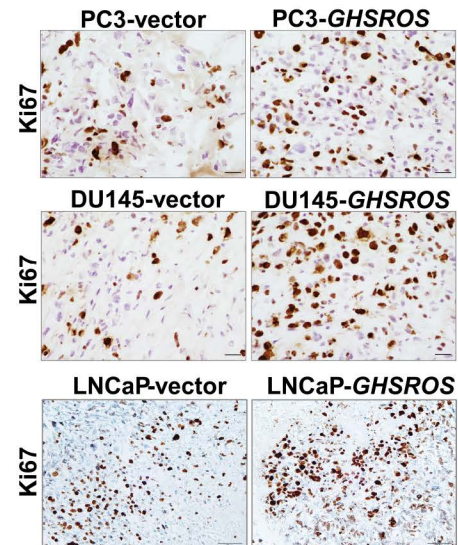

**a**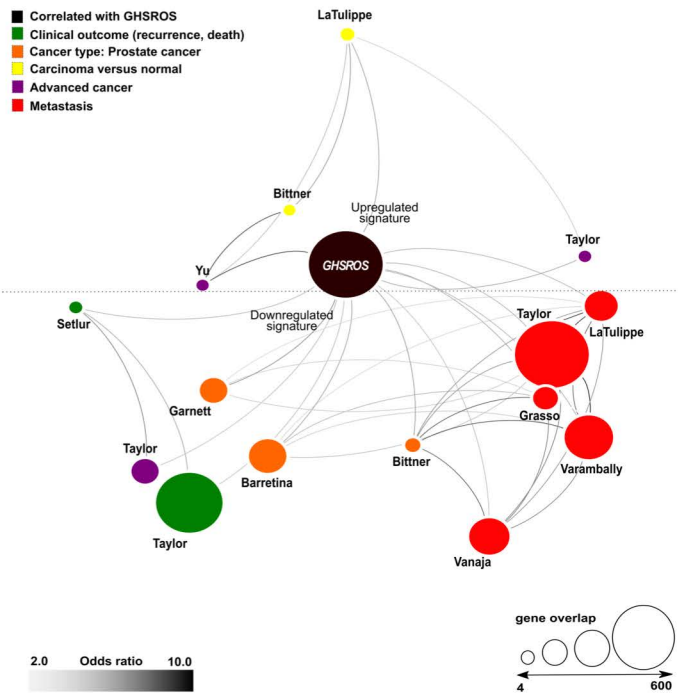**b**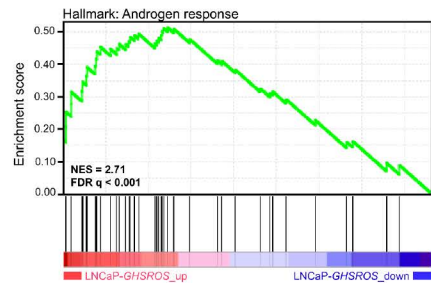**c**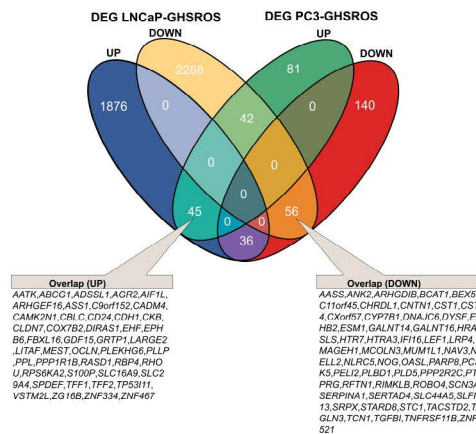**d**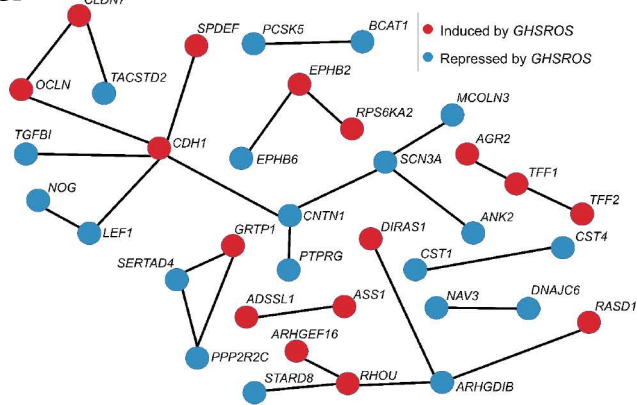**e**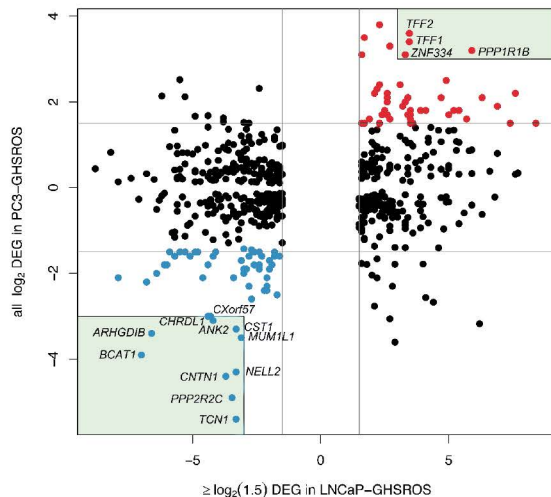**f**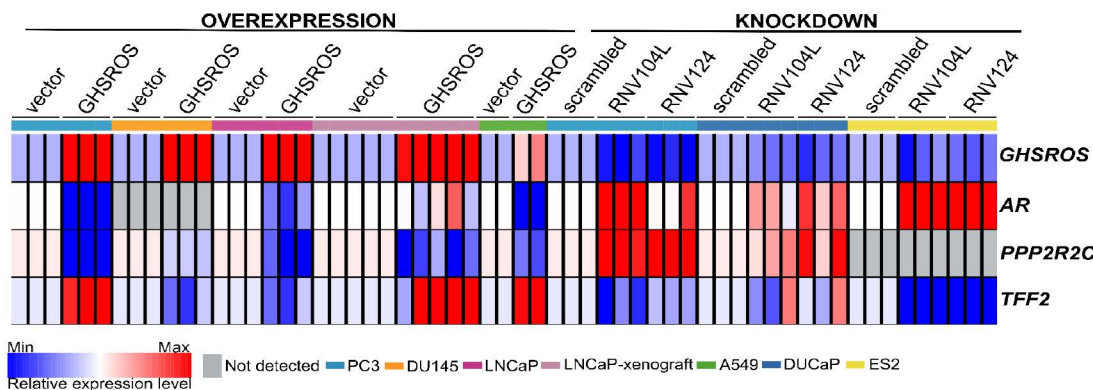

# Supplementary information.

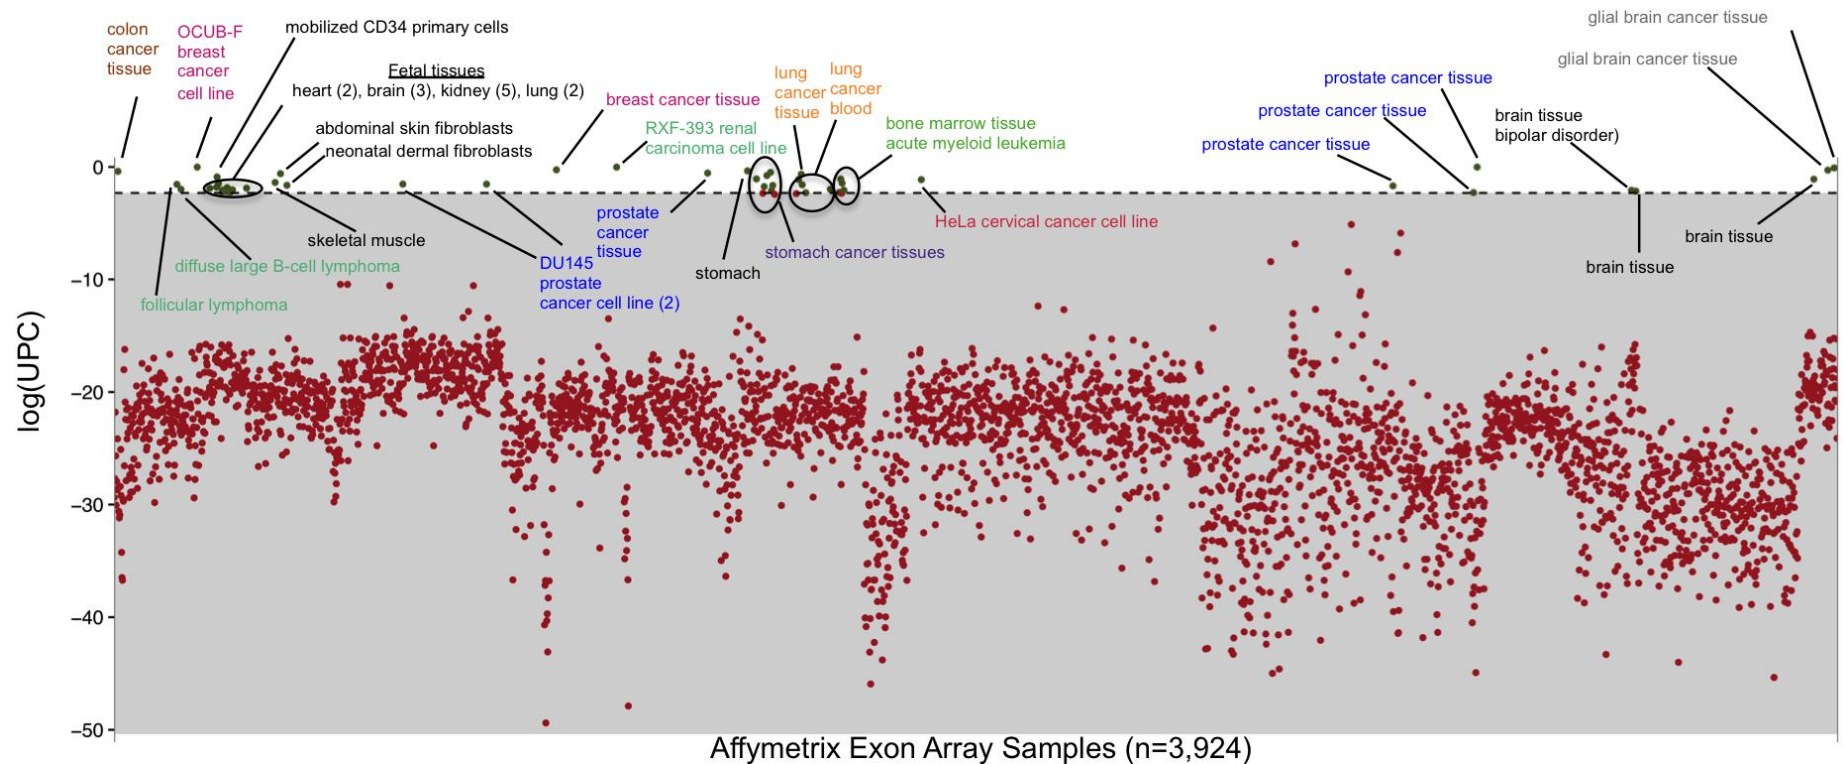

**Supplementary Fig. S1. Scatterplot of *GHSROS* Universal exPReSSion Code values in publicly available exon array datasets.** The scatter plot shows the log of Universal exPReSSion Code (UPC) values, an estimate on whether a gene is actively transcribed in exon array samples. The dotted horizontal line separates samples with a UPC  $\geq 0.1$ .

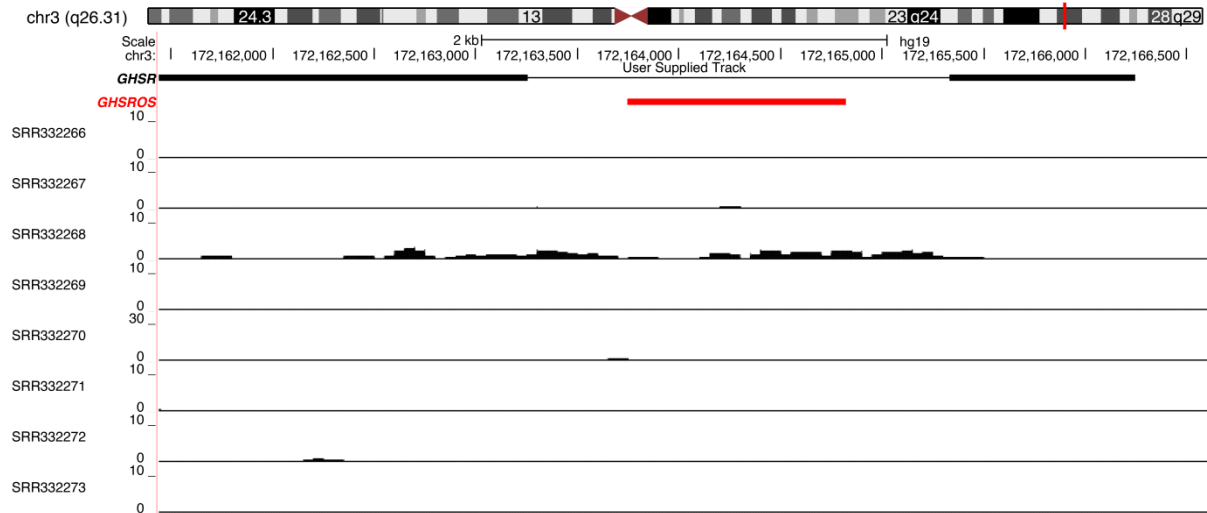

**Supplementary Fig. S2.** UCSC genome browser visualization of *GHSR/GHSROS* locus expression in castration-resistant prostate cancer. *GHSR* exons (black), antisense *GHSROS* exon (red). SRR332266 to SRR332273 denote NCBI Sequence Read Archive (SRA) database accession numbers. The y-axis represents read counts normalized to sequencing depth.

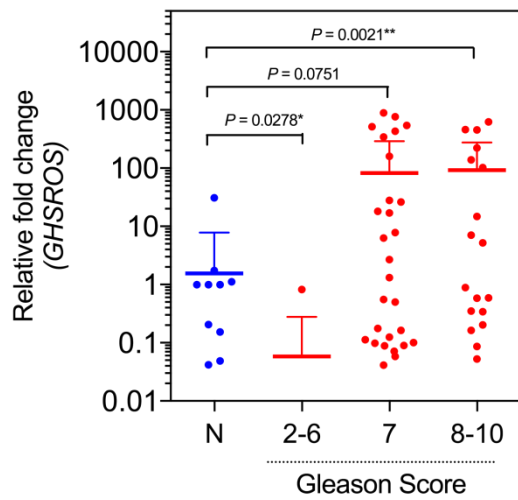

**Supplementary Fig. S3. *GHSROS* expression in OriGene TissueScan Prostate Cancer Tissue qPCR panels stratified by Gleason score.**  $*P \leq 0.05$ ,  $**P \leq 0.01$ , Mann-Whitney-Wilcoxon test. Expression was normalized to the housekeeping gene *RPL32* and relative to a normal prostate sample.

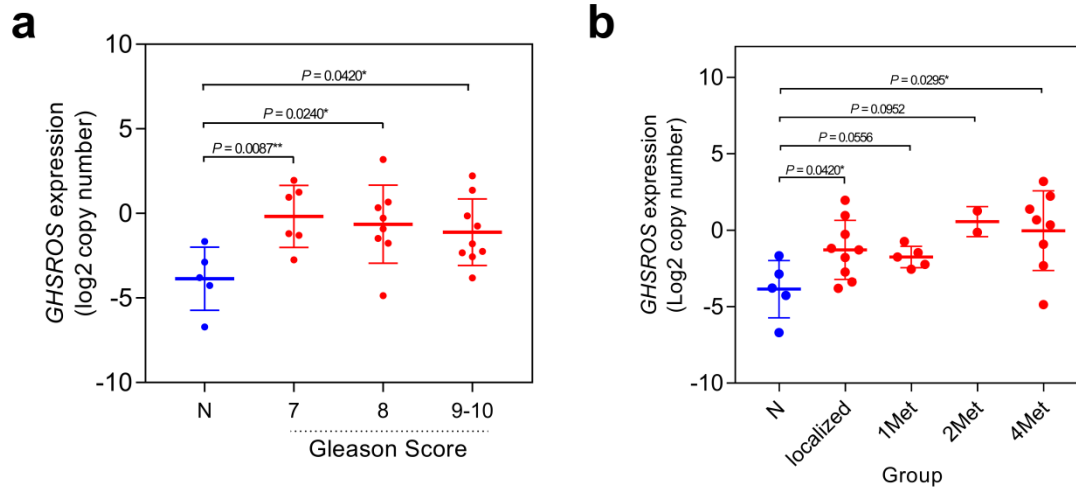

**Supplementary Fig. S4. *GHSROS* expression in the Andalusian Biobank prostate tissue cohort.** *GHSROS* expression in the Andalusian Biobank prostate tissue cohort stratified by (a) Gleason score and (b) number of metastatic sites. 1 Met denotes one and  $\geq 2$  Met two or more metastatic sites. Absolute expression levels were determined by qRT-PCR and adjusted by a normalization factor calculated from the expression levels of three housekeeping genes (*HPRT*, *ACTB*, and *GAPDH*). N denotes normal prostate.  $*P \leq 0.05$ ,  $**P \leq 0.01$ , Mann-Whitney-Wilcoxon test.

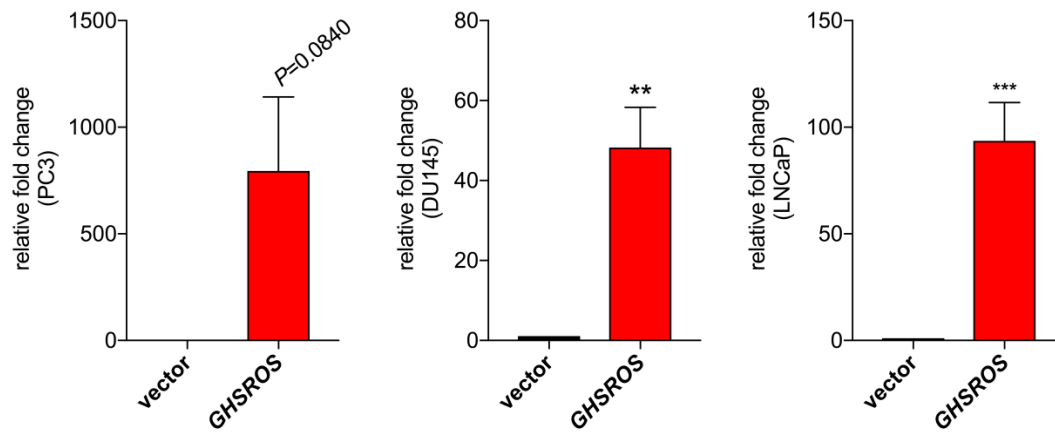

**Supplementary Fig. S5. Confirmation of *GHSROS* overexpression in prostate cancer-derived cell lines.** Bar graphs show qRT-PCR quantification of the relative expression levels of *GHSROS* when overexpressed in prostate-derived (PC3, DU145, and LNCaP) cancer cell lines. Expression was normalized to the housekeeping gene *RPL32* using the comparative  $2^{-\Delta\Delta C_t}$  method of quantification. Results are relative to the respective vector control. Mean  $\pm$  s.e.m.,  $n=3$ , \*\* $P \leq 0.01$ , \*\*\* $P \leq 0.001$ , Student's *t*-test.

```

GUUUCACAGAGGAUUGAAUAUACAGUUAGGAUUAAGAAUCACUGAGAUGAAUGAUUCUAU 60
GCCACUUACAAUAGACAUAAAGUAAGGCUAUUUUUAAACCAACUCAUAAAAUUUCAUCC 120
AUCCAAGUCUUCAUUUUGCCUAUGUAAGAUAAUUUUUAAUGAUGUCUAAAUGUUUAGAUU 180
GUUUUAAAUUCAGAAAUCAGGGAAAAUAAUACAAAUAUUUUUUUAGUCGUUGUAACAC 240
UUUAGUGAUCCCUUCAAAUUGUCAAGGAAGAAAGUUAACAUUGGUGUUGAGACACC 300
AAUGAAGAAUUAAUGGCUUGAAAAUAAAAUUGGAGGAAUUUAAACUUUACCUUAAA 360
ACUAAAGUUGUAUAGUAGCAACUUAACUGCCACAGUAACAUGUGACUCUCGUAGGUGAGA 420
GCUUAGGAUCCCUUGGAGGACACUAGCAGGUUAUAACCUAUGAGUCAUAUCACGAGAAU 480
CACCGGUCCAGAAAAUAAAAUCUUUGACAUCCUUGAAUAAACUCUAUCACUUUAAUUG 540
GAGGAUCCAGGAACUGUAAAAUUGGAAUUAUGAAUUAUCCUGGAAUGGCUUCUAGAAG 600
CCUAAAAUUAUGCCAUUAAGUAUGAAGUCUUGACUAUAAUUCUAAAAUAAAAUUAUAC 660
AGACCUUGGUUUUGAAAAUGCAAGUAGAGUUAUAAUUUUGCUGGGCUGUAACCAUAAUUA 720
UUAAUACUUCACUUGUACCAAAACAUAAUACUUAAGAAGCUGAAUUUGGCAAUAAACA 780
UUCAGCAAUCCAGUUAUGACAUUGUGCCAGAUUCCUGAAGGGUCAUUUGGGGAAGU 840
AGUGAAUUCUGUUGGUUUCCACAAAGUCUCCUUCCUCCUGUUGGAGCUUUGUUUAAUCU 900
AGUUUAUCCUUAUCCUUAUCCUAGUCUAUCCUACCUGAAGAGGCAGGUAAUCAUAAAAACA 960
AAUGAGACUUCACUGAUUUUGUCACUGACUCCUUACAAAGCUGUAUGAACAGCAGCAGGG 1020
UAAACAGAAUUGAUGCAAUUAUCUGAAAAAAUGCAGGGCAGAAAACAAUACAAUUAUG 1080
AAAGAAAAUUGAAUAAUCUC 1100
ASO LNA RNV104L and RNV124
qRT-PCR amplicon

```

**Supplementary Fig. S6. Sequence of the lncRNA *GHSROS* and regions targeted by oligonucleotides.** The 1.1kb *GHSROS* sequence. Locked nucleic antisense oligonucleotide (LNA-ASO) locations are highlighted in red and the qRT-PCR amplicon in yellow.



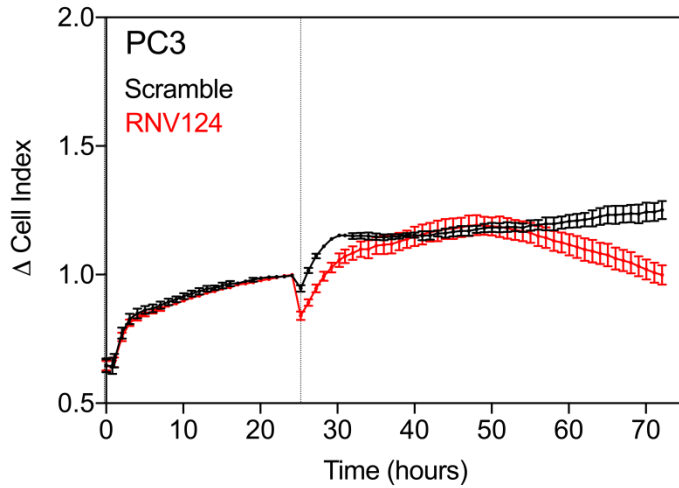

**Supplementary Fig. S7. *GHSROS* knockdown attenuates PC3 cell survival upon serum starvation.** Cells were transfected with the LNA-ASO RNV124 and grown for 24 hours (indicated by a vertical dotted line) prior to serum starvation. Results are relative to scrambled control. Mean  $\pm$  s.e.m.,  $n=3$ . At 48 hours after serum starvation, (72 hours after cells transfected as indicated on the x-axis), there was a significant difference in survival ( $P = 0.049$ , Student's  $t$ -test).

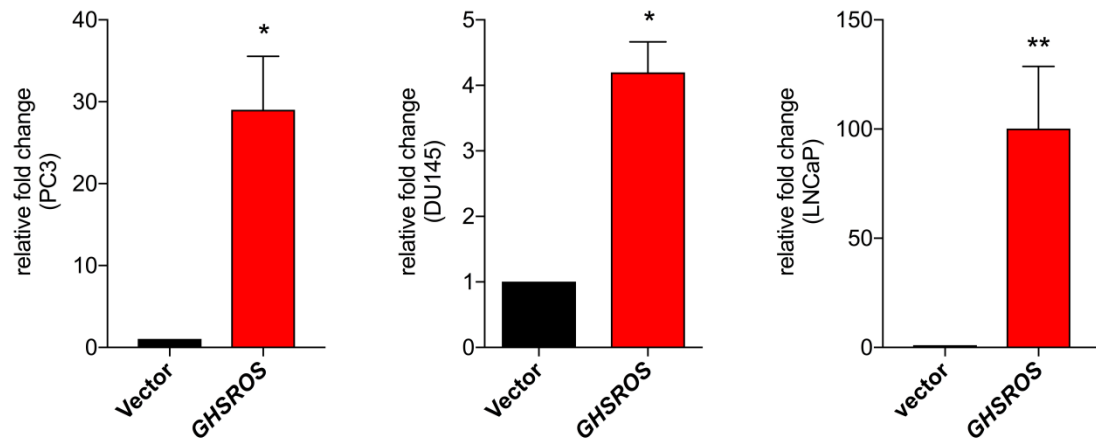

**Supplementary Fig. S8. Validation of *GHSROS* overexpression in PC3, DU145, and LNCaP tumor xenografts by qRT-PCR.** Expression changes were measured from excised PC3 ( $n=2$  vector,  $n=3$  *GHSROS*), DU145 ( $n=2$  vector,  $n=3$  *GHSROS*), and LNCaP xenografts ( $n=8$  vector,  $n=5$  *GHSROS*) at *in vivo* endpoint. Expression was normalized to the housekeeping gene *RPL32*. Results are relative to the respective vector control. Mean  $\pm$  s.e.m.,  $n=3$ ,  $*P \leq 0.05$ ,  $**P \leq 0.01$ , Student's *t*-test.

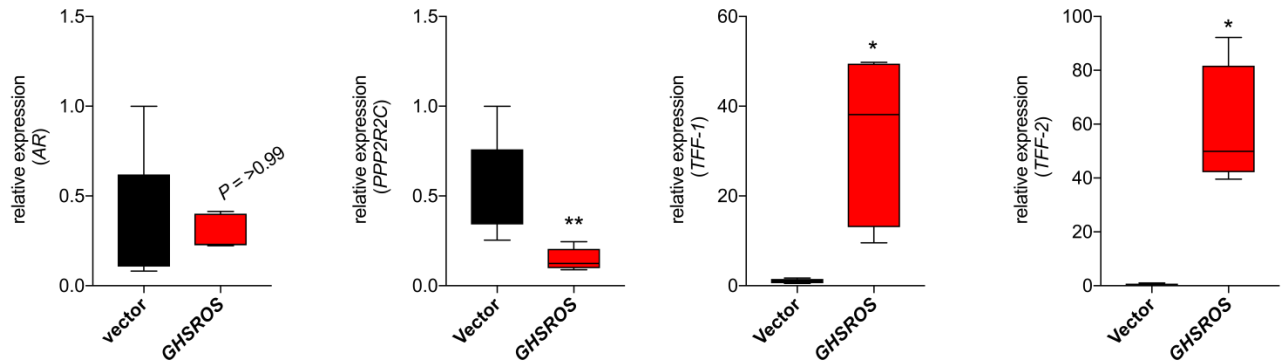

**Supplementary Fig. S9. Expression of selected genes in LNCaP tumor xenografts overexpressing *GHSROS*.** Expression changes were measured by qRT-PCR from excised LNCaP ( $n=4-8$  vector,  $n=4-5$  *GHSROS*) at *in vivo* endpoint. Expression was normalized to the housekeeping gene *RPL32*. Results are relative to the respective vector control. Mean,  $n=3$ ,  $*P \leq 0.05$ ,  $***P \leq 0.01$ , Student's *t*-test.

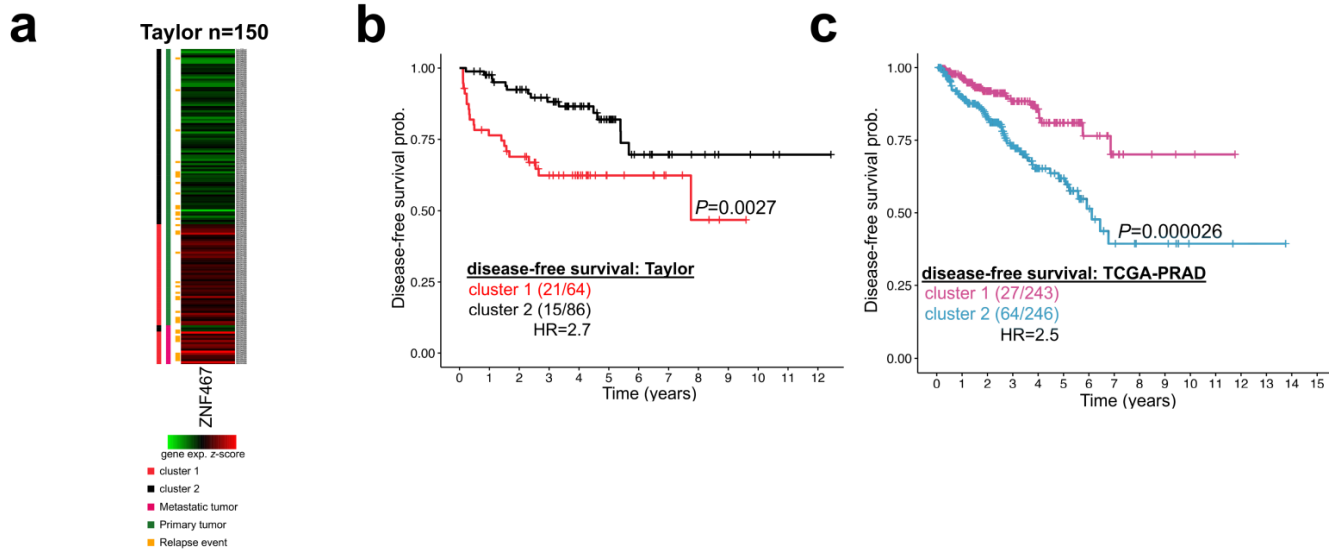

**Supplementary Fig. S10. Zinc finger protein 467 (*ZNF467*), a gene induced by forced *GHSROS*-overexpression, is upregulated by metastatic tumors and associated with adverse relapse outcome. (a) Heat map of *ZNF467* expression in the Taylor cohort normalized to depict relative values within rows (samples) with high (red) and low expression (green). Vertical bars show patient grouping by *k*-means clustering (cluster 1, red; cluster 2, black), tumor type (primary, green; metastatic pink), and relapse status (relapse event, orange). (b) Kaplan-Meier analyses of *ZNF467* in the Taylor cohort. Patients were stratified by *k*-means clustering, as described in (a). (c) Kaplan-Meier analyses of *ZNF467* in the TCGA-PRAD cohort of 489 localized prostate tumors. Patients were stratified by *k*-means clustering (cluster 1, purple; cluster 2, turquoise).**

**a**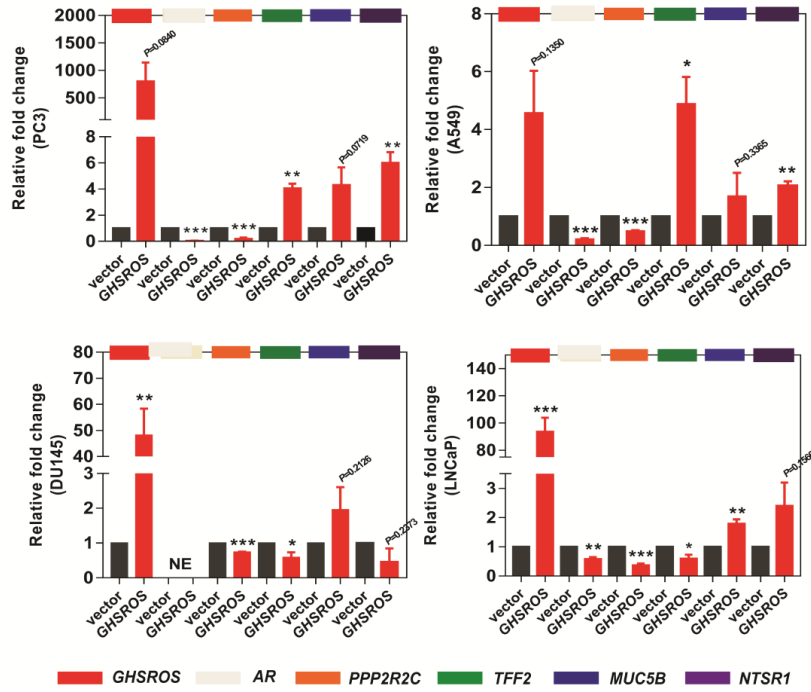**b**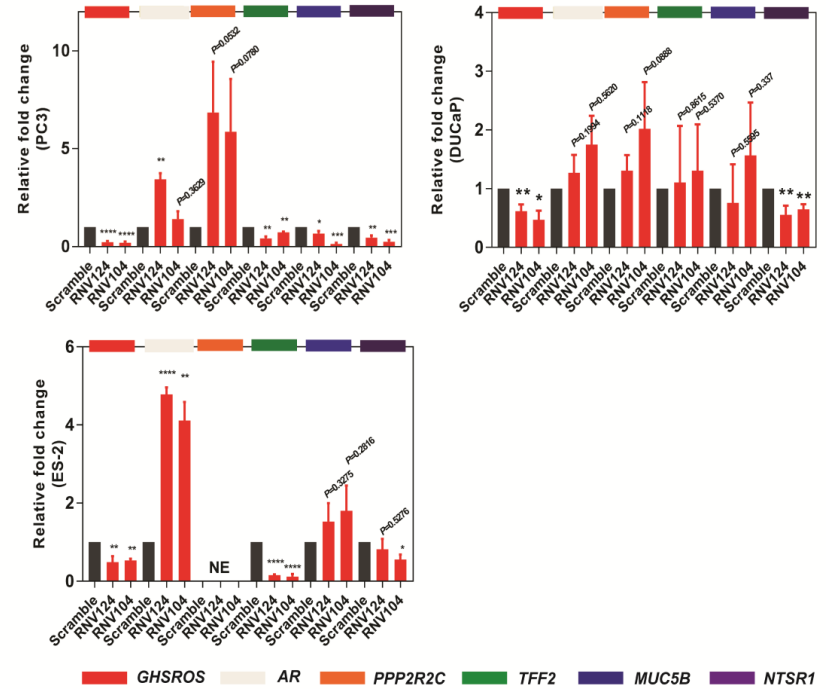

**Supplementary Fig. S11. Effects of *GHSROS* perturbation in cultured cells assessed by qRT-PCR.** (a) qRT-PCR validation of 5 genes regulated by *GHSROS*. Expression was normalized to the housekeeping gene RPL32. Results are relative to the respective vector control. Coloured bars indicate individual genes. Genes that were not expressed represented as no expression (NE). Mean  $\pm$  s.e.m.,  $n=3$ , \* $P \leq 0.05$ , \*\* $P \leq 0.01$ , \*\*\* $P \leq 0.001$ , Student's *t*-test. (b) qRT-PCR validation of regulated genes following knockdown of *GHSROS* by transfection with LNA-ASOs for 48 hours. Expression was normalized to the housekeeping gene *RPL32*. Results are relative to the respective scrambled control. Annotated as in (a).

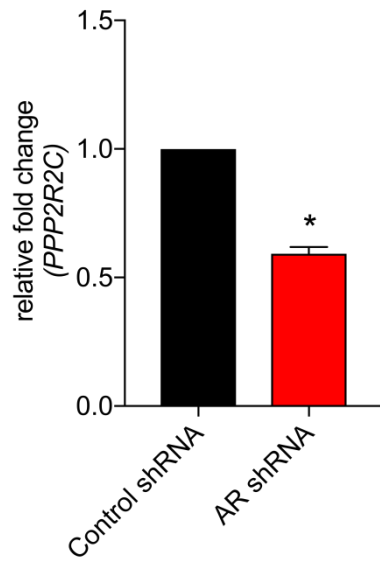

**Supplementary Fig. S12. Effect of androgen receptor (AR) perturbation in LP50 prostate cancer cells on *PPP2R2C* expression.** Assessed by microarray (NCBI GEO accession no. GSE22483). Mean  $\pm$  s.e.m.  $n=2$ , \* $Q \leq 0.05$ , moderated  $t$ -test.

**Supplementary Table S1. Correlation between *GHSROS* expression and clinicopathological parameters in OriGene TissueScan Prostate Cancer Tissue qPCR panels.** Six samples were excluded due to missing clinical information. Relative *GHSROS* expression in tumors (T) stratified by clinical stage and Gleason score was compared to a normal prostate sample (N). *P*-values were calculated using the Mann-Whitney-Wilcoxon test. NA = not applicable, PD = other prostatic diseases.

| <b>Clinicopathological parameters</b> | <b>Sample number (<i>n</i>)</b> | <b><i>P</i>-value</b> |
|---------------------------------------|---------------------------------|-----------------------|
| <b>Age at diagnosis (mean ± SD)</b>   | 62.2 ± 7.80                     |                       |
|                                       |                                 |                       |
| N/ T                                  | 24/88                           | 0.1413                |
| PD/ T                                 | 31/88                           | 0.8001                |
| N/ PD                                 | 24/31                           | 0.0691                |
|                                       |                                 |                       |
| <b>Clinical stage</b>                 |                                 |                       |
| N (normal prostate)                   | 24                              |                       |
| I                                     | 0                               | NA                    |
| II                                    | 47                              | 0.311                 |
| III                                   | 33                              | 0.0855                |
| IV                                    | 3                               | 0.0185                |
|                                       |                                 |                       |
| <b>Gleason score</b>                  |                                 |                       |
| N (normal prostate)                   | 24                              |                       |
| 2-6                                   | 15                              | 0.0278                |
| 7                                     | 47                              | 0.0751                |
| 8-10                                  | 25                              | 0.00210               |

**Supplementary Table S2. Correlation between *GHSROS* expression and clinicopathological parameters in the Andalusian Biobank prostate tissue cohort.**

Absolute levels of *GHSROS* expression in tumors were stratified by Gleason score and the number of metastatic tumor sites were compared to normal prostate (N). Tumors positive or negative for extraprostatic extension and perineural infiltration were compared to each other. *P*-values were calculated using the Mann-Whitney-Wilcoxon test. NA = not applicable.

| <b>Clinicopathological parameters</b>       | <b>Sample number (<i>n</i>)</b> | <b><i>P</i>-value</b> |
|---------------------------------------------|---------------------------------|-----------------------|
| <b>Age at diagnosis (mean ± SD)</b>         | 73.7 ± 9.81                     |                       |
|                                             |                                 |                       |
| <b>Gleason score</b>                        |                                 |                       |
| N (normal prostate)                         | 8                               |                       |
| 7                                           | 6                               | 0.00870               |
| 8                                           | 9                               | 0.0240                |
| 9-10                                        | 13                              | 0.0420                |
|                                             |                                 |                       |
| <b>Number of metastatic sites</b>           |                                 |                       |
| N (normal prostate)                         | 8                               |                       |
| primary prostate tumor: 0/localized         | 10                              | 0.0420                |
| primary prostate tumor: 1 metastatic site   | 6                               | 0.0556                |
| primary prostate tumor: ≥2 metastatic sites | 12                              | 0.0127                |
|                                             |                                 |                       |
| <b>Extraprostatic extension</b>             |                                 |                       |
| -                                           | 16                              | 0.379                 |
| +                                           | 11                              |                       |
|                                             |                                 |                       |
| <b>Perineural infiltration</b>              |                                 |                       |
| -                                           | 8                               | 0.415                 |
| +                                           | 20                              |                       |



**Supplementary Table S3. Differentially expressed genes in PC3-GHSROS cells** compared to empty vector control. Red: higher expression in PC3-GHSROS cells; Black: lower expression in PC3-GHSROS cells. Fold-changes are log<sub>2</sub> transformed; *Q*-value denotes the false discovery rate (FDR; Benjamini-Hochberg)-adjusted *P*-value (cutoff ≤ 0.05).

| <i>Gene Symbol</i> | <b>Gene Name</b>                                                | <b>log<sub>2</sub> Fold Change</b> | <b><i>P</i>-value</b> | <b><i>Q</i>-value</b> |
|--------------------|-----------------------------------------------------------------|------------------------------------|-----------------------|-----------------------|
| <i>AADACPI</i>     | arylacetamide deacetylase pseudogene 1                          | -1.9                               | 8.2E-08               | 1.3E-06               |
| <i>AASS</i>        | aminoadipate-semialdehyde synthase                              | -2.4                               | 2.5E-08               | 5.3E-07               |
| <i>AATK</i>        | apoptosis associated tyrosine kinase                            | 1.8                                | 5.1E-08               | 8.9E-07               |
| <i>ABCC3</i>       | ATP binding cassette subfamily C member 3                       | 1.8                                | 7.7E-13               | 7.1E-10               |
| <i>ABCG1</i>       | ATP binding cassette subfamily G member 1                       | 2.1                                | 1.7E-09               | 7.5E-08               |
| <i>ACHE</i>        | acetylcholinesterase (Cartwright blood group)                   | 2.5                                | 4.3E-10               | 3.0E-08               |
| <i>ACSS1</i>       | acyl-CoA synthetase short-chain family member 1                 | -1.9                               | 7.4E-11               | 9.6E-09               |
| <i>ADAM23</i>      | ADAM metallopeptidase domain 23                                 | -2.7                               | 5.3E-10               | 3.5E-08               |
| <i>ADAM8</i>       | ADAM metallopeptidase domain 8                                  | 2.7                                | 5.5E-14               | 1.5E-10               |
| <i>ADD2</i>        | adducin 2                                                       | -3.2                               | 2.1E-09               | 8.8E-08               |
| <i>ADSSL1</i>      | adenylosuccinate synthase like 1                                | 1.5                                | 6.2E-08               | 1.0E-06               |
| <i>AFF2</i>        | AF4/FMR2 family member 2                                        | -3.9                               | 1.1E-11               | 3.0E-09               |
| <i>AGR2</i>        | anterior gradient 2, protein disulphide isomerase family member | 2.1                                | 3.9E-12               | 1.7E-09               |
| <i>AGTR1</i>       | angiotensin II receptor type 1                                  | -2.1                               | 3.6E-08               | 7.0E-07               |
| <i>AIF1L</i>       | allograft inflammatory factor 1 like                            | 1.6                                | 2.7E-08               | 5.6E-07               |
| <i>AMOT</i>        | angiominin                                                      | -3.1                               | 2.3E-11               | 4.7E-09               |
| <i>ANGPT1</i>      | angiopoietin 1                                                  | -2.8                               | 1.0E-08               | 2.7E-07               |
| <i>ANGPTL4</i>     | angiopoietin like 4                                             | 1.6                                | 2.0E-08               | 4.5E-07               |
| <i>ANK1</i>        | ankyrin 1                                                       | 1.5                                | 9.3E-06               | 5.5E-05               |
| <i>ANK2</i>        | ankyrin 2, neuronal                                             | -3.1                               | 2.4E-09               | 9.5E-08               |
| <i>ANOS1</i>       | anosmin 1                                                       | 1.9                                | 6.1E-09               | 1.8E-07               |
| <i>ANXA10</i>      | annexin A10                                                     | -2.3                               | 1.1E-09               | 5.7E-08               |
| <i>APOBEC3G</i>    | apolipoprotein B mRNA editing enzyme catalytic subunit 3G       | 2.0                                | 3.3E-08               | 6.5E-07               |
| <i>AR</i>          | androgen receptor                                               | -3.6                               | 1.4E-09               | 6.6E-08               |
| <i>ARHGAP44</i>    | Rho GTPase activating protein 44                                | -2.1                               | 1.6E-08               | 3.8E-07               |
| <i>ARHGDI1B</i>    | Rho GDP dissociation inhibitor beta                             | -3.4                               | 5.3E-11               | 7.7E-09               |
| <i>ARHGEF16</i>    | Rho guanine nucleotide exchange factor 16                       | 2.4                                | 7.8E-10               | 4.6E-08               |
| <i>ARNT2</i>       | aryl hydrocarbon receptor nuclear translocator 2                | -1.6                               | 1.0E-07               | 1.5E-06               |
| <i>ASS1</i>        | argininosuccinate synthase 1                                    | 1.8                                | 2.2E-08               | 4.8E-07               |
| <i>B3GALT5</i>     | beta-1,3-galactosyltransferase 5                                | -2.0                               | 2.1E-06               | 1.7E-05               |

|                      |                                                               |      |         |         |
|----------------------|---------------------------------------------------------------|------|---------|---------|
| <i>B3GALT5-AS1</i>   | B3GALT5 antisense RNA 1                                       | -2.2 | 6.1E-09 | 1.8E-07 |
| <i>B3GNT7</i>        | UDP-GlcNAc:betaGal beta-1,3-N-acetylglucosaminyltransferase 7 | 1.6  | 4.2E-09 | 1.4E-07 |
| <i>B4GALNT1</i>      | beta-1,4-N-acetyl-galactosaminyltransferase 1                 | -1.8 | 8.8E-11 | 1.1E-08 |
| <i>BCAT1</i>         | branched chain amino acid transaminase 1                      | -3.9 | 1.5E-11 | 3.4E-09 |
| <i>BEX2</i>          | brain expressed X-linked 2                                    | -1.8 | 4.2E-07 | 4.4E-06 |
| <i>BEX4</i>          | brain expressed X-linked 4                                    | -1.8 | 1.1E-08 | 2.9E-07 |
| <i>BEX5</i>          | brain expressed X-linked 5                                    | -1.7 | 8.1E-07 | 7.5E-06 |
| <i>BIK</i>           | BCL2 interacting killer                                       | 1.8  | 2.1E-06 | 1.6E-05 |
| <i>BLMH</i>          | bleomycin hydrolase                                           | -1.8 | 6.6E-13 | 6.5E-10 |
| <i>BMP6</i>          | bone morphogenetic protein 6                                  | -2.3 | 5.1E-09 | 1.6E-07 |
| <i>BTBD11</i>        | BTB domain containing 11                                      | -3.1 | 5.7E-10 | 3.6E-08 |
| <i>BTG3</i>          | BTG family member 3                                           | -2.0 | 1.1E-10 | 1.3E-08 |
| <i>C11orf45</i>      | chromosome 11 open reading frame 45                           | -1.8 | 2.0E-08 | 4.5E-07 |
| <i>C20orf166-AS1</i> | C20orf166 antisense RNA 1                                     | 1.8  | 3.0E-07 | 3.5E-06 |
| <i>C9orf152</i>      | chromosome 9 open reading frame 152                           | 1.8  | 5.3E-07 | 5.4E-06 |
| <i>CA9</i>           | carbonic anhydrase 9                                          | 2.5  | 3.1E-08 | 6.2E-07 |
| <i>CACNA2D2</i>      | calcium voltage-gated channel auxiliary subunit alpha2delta 2 | -1.6 | 2.6E-08 | 5.5E-07 |
| <i>CADM4</i>         | cell adhesion molecule 4                                      | 2.3  | 8.8E-10 | 5.0E-08 |
| <i>CADPS2</i>        | calcium dependent secretion activator 2                       | -2.0 | 8.9E-12 | 2.6E-09 |
| <i>CALB1</i>         | calbindin 1                                                   | 3.3  | 2.1E-10 | 1.9E-08 |
| <i>CAMK2N1</i>       | calcium/calmodulin dependent protein kinase II inhibitor 1    | 3.3  | 4.1E-12 | 1.7E-09 |
| <i>CAPN6</i>         | calpain 6                                                     | -2.5 | 3.3E-08 | 6.5E-07 |
| <i>CAV1</i>          | caveolin 1                                                    | 1.6  | 5.2E-13 | 6.0E-10 |
| <i>CBLC</i>          | Cbl proto-oncogene C                                          | 1.8  | 2.8E-07 | 3.3E-06 |
| <i>CCBE1</i>         | collagen and calcium binding EGF domains 1                    | 1.5  | 1.5E-08 | 3.7E-07 |
| <i>CCDC160</i>       | coiled-coil domain containing 160                             | -2.5 | 1.6E-08 | 3.8E-07 |
| <i>CCNB3</i>         | cyclin B3                                                     | -2.1 | 5.3E-08 | 9.2E-07 |
| <i>CD24</i>          | CD24 molecule                                                 | 1.5  | 2.9E-12 | 1.5E-09 |
| <i>CD33</i>          | CD33 molecule                                                 | -2.0 | 5.7E-08 | 9.7E-07 |
| <i>CD70</i>          | CD70 molecule                                                 | -2.1 | 6.3E-07 | 6.2E-06 |
| <i>CDH1</i>          | cadherin 1                                                    | 2.2  | 4.1E-08 | 7.8E-07 |
| <i>CDH12</i>         | cadherin 12                                                   | -1.6 | 8.8E-10 | 5.0E-08 |
| <i>CDH3</i>          | cadherin 3                                                    | 2.0  | 1.5E-07 | 2.1E-06 |
| <i>CEACAM6</i>       | carcinoembryonic antigen related cell adhesion molecule 6     | 1.7  | 6.2E-07 | 6.1E-06 |
| <i>CEND1</i>         | cell cycle exit and neuronal differentiation 1                | -2.0 | 2.4E-07 | 2.9E-06 |
| <i>CHD7</i>          | chromodomain helicase DNA binding protein 7                   | -1.6 | 1.1E-06 | 9.6E-06 |
| <i>CHRDL1</i>        | chordin-like 1                                                | -3.0 | 5.4E-10 | 3.5E-08 |
| <i>CKB</i>           | creatine kinase B                                             | 1.8  | 2.6E-11 | 5.0E-09 |
| <i>CLDN7</i>         | claudin 7                                                     | 2.1  | 1.4E-07 | 1.9E-06 |
| <i>CLMN</i>          | calmin (calponin-like, transmembrane)                         | -2.4 | 4.9E-09 | 1.6E-07 |

|                  |                                                            |      |         |         |
|------------------|------------------------------------------------------------|------|---------|---------|
| <i>CNKSR2</i>    | connector enhancer of kinase suppressor of Ras 2           | -2.4 | 9.2E-09 | 2.5E-07 |
| <i>CNTN1</i>     | contactin 1                                                | -4.4 | 4.2E-11 | 6.6E-09 |
| <i>COBL</i>      | cordon-bleu WH2 repeat protein                             | -4.6 | 1.0E-11 | 2.9E-09 |
| <i>COL21A1</i>   | collagen type XXI alpha 1 chain                            | -1.9 | 1.2E-07 | 1.7E-06 |
| <i>COL5A1</i>    | collagen type V alpha 1                                    | 2.1  | 1.9E-09 | 8.2E-08 |
| <i>COX7B2</i>    | cytochrome c oxidase subunit 7B2                           | 3.8  | 1.8E-09 | 7.6E-08 |
| <i>CPA6</i>      | carboxypeptidase A6                                        | -2.3 | 1.5E-08 | 3.5E-07 |
| <i>CPEB1</i>     | cytoplasmic polyadenylation element binding protein 1      | -2.5 | 5.4E-11 | 7.7E-09 |
| <i>CPZ</i>       | carboxypeptidase Z                                         | 1.6  | 1.7E-09 | 7.5E-08 |
| <i>CRABP1</i>    | cellular retinoic acid binding protein 1                   | 4.1  | 1.1E-11 | 3.0E-09 |
| <i>CRABP2</i>    | cellular retinoic acid binding protein 2                   | 2.4  | 1.1E-12 | 7.8E-10 |
| <i>CREB3L1</i>   | cAMP responsive element binding protein 3 like 1           | 4.0  | 2.4E-13 | 3.4E-10 |
| <i>CRIP1</i>     | cysteine rich protein 1                                    | 2.2  | 1.4E-10 | 1.5E-08 |
| <i>CRIP2</i>     | cysteine rich protein 2                                    | 2.3  | 9.6E-12 | 2.8E-09 |
| <i>CSMD2</i>     | CUB and Sushi multiple domains 2                           | -2.5 | 7.9E-09 | 2.2E-07 |
| <i>CST1</i>      | cystatin SN                                                | -3.3 | 1.3E-10 | 1.4E-08 |
| <i>CST4</i>      | cystatin S                                                 | -2.6 | 1.8E-09 | 7.6E-08 |
| <i>CXADR</i>     | coxsackie virus and adenovirus receptor                    | -2.8 | 4.0E-11 | 6.5E-09 |
| <i>CXADRP2</i>   | coxsackie virus and adenovirus receptor pseudogene 2       | -1.8 | 3.5E-07 | 3.9E-06 |
| <i>CXCL5</i>     | C-X-C motif chemokine ligand 5                             | 1.5  | 1.0E-06 | 9.0E-06 |
| <i>CXorf57</i>   | chromosome X open reading frame 57                         | -3.0 | 4.7E-10 | 3.2E-08 |
| <i>CYP4F35P</i>  | cytochrome P450 family 4 subfamily F member 35, pseudogene | -1.5 | 1.4E-07 | 2.0E-06 |
| <i>CYP4V2</i>    | cytochrome P450 family 4 subfamily V member 2              | -2.6 | 2.3E-09 | 9.1E-08 |
| <i>CYP7B1</i>    | cytochrome P450 family 7 subfamily B member 1              | -2.3 | 2.2E-08 | 4.8E-07 |
| <i>DEPTOR</i>    | DEP domain containing MTOR-interacting protein             | -1.7 | 6.7E-08 | 1.1E-06 |
| <i>DGKG</i>      | diacylglycerol kinase gamma                                | -2.7 | 1.0E-10 | 1.2E-08 |
| <i>DIRAS1</i>    | DIRAS family GTPase 1                                      | 2.2  | 2.8E-10 | 2.2E-08 |
| <i>DLX3</i>      | distal-less homeobox 3                                     | -1.6 | 1.7E-06 | 1.4E-05 |
| <i>DMD</i>       | dystrophin                                                 | -3.0 | 4.0E-10 | 2.8E-08 |
| <i>DNAH5</i>     | dynein axonemal heavy chain 5                              | -1.7 | 3.3E-09 | 1.2E-07 |
| <i>DNAJA4</i>    | DnaJ heat shock protein family (Hsp40) member A4           | -2.0 | 1.8E-08 | 4.1E-07 |
| <i>DNAJC6</i>    | DnaJ heat shock protein family (Hsp40) member C6           | -2.4 | 4.6E-10 | 3.1E-08 |
| <i>DOCK3</i>     | dedicator of cytokinesis 3                                 | -1.5 | 9.4E-09 | 2.6E-07 |
| <i>DPY19L2P1</i> | DPY19L2 pseudogene 1                                       | -1.9 | 1.2E-06 | 1.1E-05 |
| <i>DTX4</i>      | deltex 4, E3 ubiquitin ligase                              | -1.8 | 1.1E-08 | 2.8E-07 |
| <i>DYSF</i>      | dysferlin                                                  | -2.0 | 5.9E-11 | 8.3E-09 |
| <i>EDA</i>       | ectodysplasin A                                            | -3.0 | 6.2E-09 | 1.8E-07 |
| <i>EGF</i>       | epidermal growth factor                                    | -2.5 | 9.1E-10 | 5.1E-08 |
| <i>EGLN3</i>     | egl-9 family hypoxia inducible factor 3                    | -1.8 | 1.3E-07 | 1.8E-06 |
| <i>EHD2</i>      | EH domain containing 2                                     | 2.3  | 9.7E-09 | 2.6E-07 |
| <i>EHF</i>       | ETS homologous factor                                      | 1.9  | 8.5E-09 | 2.4E-07 |
| <i>ENTPD3</i>    | ectonucleoside triphosphate diphosphohydrolase 3           | -1.8 | 1.1E-08 | 2.8E-07 |

|                  |                                                      |      |         |         |
|------------------|------------------------------------------------------|------|---------|---------|
| <i>EOMES</i>     | eomesodermin                                         | -2.1 | 1.2E-09 | 6.1E-08 |
| <i>EPHB2</i>     | EPH receptor B2                                      | -1.5 | 2.6E-10 | 2.1E-08 |
| <i>EPHB6</i>     | EPH receptor B6                                      | 1.7  | 1.4E-10 | 1.5E-08 |
| <i>ESM1</i>      | endothelial cell specific molecule 1                 | -1.8 | 4.3E-11 | 6.7E-09 |
| <i>EYA1</i>      | EYA transcriptional coactivator and phosphatase 1    | -3.5 | 1.5E-10 | 1.6E-08 |
| <i>F2RL2</i>     | coagulation factor II thrombin receptor like 2       | -1.6 | 2.0E-07 | 2.6E-06 |
| <i>FAM110C</i>   | family with sequence similarity 110 member C         | -3.0 | 1.6E-10 | 1.6E-08 |
| <i>FAM131B</i>   | family with sequence similarity 131 member B         | 1.5  | 1.7E-11 | 3.6E-09 |
| <i>FAM134B</i>   | family with sequence similarity 134 member B         | -1.5 | 6.3E-08 | 1.0E-06 |
| <i>FAM20A</i>    | family with sequence similarity 20 member A          | 2.0  | 1.3E-07 | 1.9E-06 |
| <i>FAM50B</i>    | family with sequence similarity 50 member B          | 1.7  | 8.5E-08 | 1.3E-06 |
| <i>FAM89A</i>    | family with sequence similarity 89 member A          | -1.6 | 5.1E-08 | 8.9E-07 |
| <i>FBP1</i>      | fructose-bisphosphatase 1                            | 2.5  | 3.1E-11 | 5.6E-09 |
| <i>FBXL16</i>    | F-box and leucine rich repeat protein 16             | 2.0  | 1.4E-08 | 3.5E-07 |
| <i>FBXL7</i>     | F-box and leucine rich repeat protein 7              | -1.7 | 1.6E-08 | 3.7E-07 |
| <i>FCGBP</i>     | Fc fragment of IgG binding protein                   | -3.1 | 1.5E-10 | 1.6E-08 |
| <i>FEZF1-AS1</i> | FEZF1 antisense RNA 1                                | -2.0 | 1.1E-06 | 9.8E-06 |
| <i>FGF13</i>     | fibroblast growth factor 13                          | -1.8 | 1.7E-08 | 4.0E-07 |
| <i>FNDC4</i>     | fibronectin type III domain containing 4             | 2.0  | 4.2E-08 | 7.9E-07 |
| <i>FOXL1</i>     | forkhead box L1                                      | 1.6  | 4.1E-10 | 2.9E-08 |
| <i>FOXRED2</i>   | FAD dependent oxidoreductase domain containing 2     | 3.6  | 2.3E-12 | 1.5E-09 |
| <i>FRMD4B</i>    | FERM domain containing 4B                            | -1.9 | 5.5E-09 | 1.7E-07 |
| <i>GAL</i>       | galanin and GMAP prepropeptide                       | -3.2 | 1.5E-09 | 6.7E-08 |
| <i>GALNT12</i>   | polypeptide N-acetylgalactosaminyltransferase 12     | 2.1  | 9.9E-10 | 5.3E-08 |
| <i>GALNT14</i>   | polypeptide N-acetylgalactosaminyltransferase 14     | -1.6 | 1.3E-08 | 3.3E-07 |
| <i>GALNT16</i>   | polypeptide N-acetylgalactosaminyltransferase 16     | -1.7 | 1.2E-06 | 1.0E-05 |
| <i>GAS6</i>      | growth arrest specific 6                             | 1.6  | 2.1E-09 | 8.8E-08 |
| <i>GBP7</i>      | guanylate binding protein 7                          | -1.5 | 2.9E-06 | 2.1E-05 |
| <i>GCNT1</i>     | glucosaminyl (N-acetyl) transferase 1, core 2        | -1.6 | 1.4E-07 | 1.9E-06 |
| <i>GCNT3</i>     | glucosaminyl (N-acetyl) transferase 3, mucin type    | -2.4 | 6.8E-09 | 2.0E-07 |
| <i>GDF15</i>     | growth differentiation factor 15                     | 1.5  | 1.5E-08 | 3.6E-07 |
| <i>GHSROS</i>    | Growth Hormone Secretagogue Receptor Opposite Strand | 5.3  | 3.4E-13 | 4.3E-10 |
| <i>GJB3</i>      | gap junction protein beta 3                          | 1.7  | 6.0E-10 | 3.8E-08 |
| <i>GNAI1</i>     | G protein subunit alpha i1                           | 1.5  | 1.6E-10 | 1.6E-08 |
| <i>GPR153</i>    | G protein-coupled receptor 153                       | 1.6  | 5.7E-13 | 6.1E-10 |
| <i>GPR63</i>     | G protein-coupled receptor 63                        | -2.3 | 2.5E-09 | 9.7E-08 |
| <i>GRID2</i>     | glutamate ionotropic receptor delta type subunit 2   | 1.7  | 1.5E-07 | 2.1E-06 |
| <i>GRIN2D</i>    | glutamate ionotropic receptor NMDA type subunit 2D   | 2.0  | 1.6E-08 | 3.7E-07 |
| <i>GRTP1</i>     | growth hormone regulated TBC protein 1               | 2.1  | 6.0E-08 | 1.0E-06 |
| <i>GUCA1B</i>    | guanylate cyclase activator 1B                       | 1.5  | 6.7E-07 | 6.5E-06 |
| <i>HEPH</i>      | hephaestin                                           | -2.4 | 2.4E-09 | 9.3E-08 |

|                  |                                                             |      |         |         |
|------------------|-------------------------------------------------------------|------|---------|---------|
| <i>HR</i>        | hair growth associated                                      | 2.2  | 5.3E-09 | 1.7E-07 |
| <i>HRASLS</i>    | HRAS like suppressor                                        | -1.9 | 2.7E-07 | 3.2E-06 |
| <i>HSPA12A</i>   | heat shock protein family A (Hsp70) member 12A              | -3.7 | 2.7E-11 | 5.1E-09 |
| <i>HSPB8</i>     | heat shock protein family B (small) member 8                | -3.5 | 9.9E-10 | 5.3E-08 |
| <i>HTR7</i>      | 5-hydroxytryptamine receptor 7                              | -2.0 | 2.4E-07 | 2.9E-06 |
| <i>HTRA3</i>     | HtrA serine peptidase 3                                     | -1.8 | 1.5E-08 | 3.6E-07 |
| <i>IFI16</i>     | interferon gamma inducible protein 16                       | -2.2 | 9.4E-13 | 7.5E-10 |
| <i>IFITM1</i>    | interferon induced transmembrane protein 1                  | 1.6  | 3.6E-06 | 2.5E-05 |
| <i>IGFBP5</i>    | insulin like growth factor binding protein 5                | 1.6  | 2.4E-12 | 1.5E-09 |
| <i>IGFBP6</i>    | insulin like growth factor binding protein 6                | 1.9  | 3.8E-11 | 6.3E-09 |
| <i>IL13RA2</i>   | interleukin 13 receptor subunit alpha 2                     | -3.0 | 6.4E-10 | 4.0E-08 |
| <i>ITGB2</i>     | integrin subunit beta 2                                     | 2.2  | 6.1E-11 | 8.4E-09 |
| <i>ITGB4</i>     | integrin subunit beta 4                                     | 1.9  | 9.2E-13 | 7.5E-10 |
| <i>ITM2A</i>     | integral membrane protein 2A                                | -2.7 | 7.3E-10 | 4.4E-08 |
| <i>JAM3</i>      | junctional adhesion molecule 3                              | -1.8 | 1.3E-08 | 3.3E-07 |
| <i>JUP</i>       | junction plakoglobin                                        | 1.5  | 5.9E-12 | 2.0E-09 |
| <i>KCNJ12</i>    | potassium voltage-gated channel subfamily J member 12       | -2.2 | 4.3E-09 | 1.4E-07 |
| <i>KCNJ3</i>     | potassium voltage-gated channel subfamily J member 3        | 1.5  | 2.4E-05 | 1.2E-04 |
| <i>KCNN3</i>     | potassium calcium-activated channel subfamily N member 3    | -2.3 | 5.9E-07 | 5.9E-06 |
| <i>KIAA0319</i>  | KIAA0319                                                    | -3.6 | 4.6E-11 | 6.9E-09 |
| <i>KIAA1210</i>  | KIAA1210                                                    | -1.7 | 2.9E-07 | 3.4E-06 |
| <i>KIAA1211</i>  | KIAA1211                                                    | -3.8 | 2.7E-12 | 1.5E-09 |
| <i>KIAA1644</i>  | KIAA1644                                                    | 2.0  | 2.6E-07 | 3.1E-06 |
| <i>KIF26A</i>    | kinesin family member 26A                                   | -1.7 | 4.5E-08 | 8.3E-07 |
| <i>KIF5C</i>     | kinesin family member 5C                                    | -2.7 | 1.6E-11 | 3.5E-09 |
| <i>KLF9</i>      | Kruppel like factor 9                                       | -3.3 | 2.5E-10 | 2.1E-08 |
| <i>KRT6B</i>     | keratin 6B                                                  | -2.2 | 1.7E-08 | 3.9E-07 |
| <i>KRT7</i>      | keratin 7                                                   | 2.6  | 1.9E-14 | 6.7E-11 |
| <i>KRT75</i>     | keratin 75                                                  | -5.5 | 3.5E-16 | 2.5E-12 |
| <i>KRT81</i>     | keratin 81                                                  | 1.5  | 3.1E-12 | 1.5E-09 |
| <i>LAMA1</i>     | laminin subunit alpha 1                                     | -2.1 | 1.6E-08 | 3.8E-07 |
| <i>LAMC3</i>     | laminin subunit gamma 3                                     | -1.7 | 2.1E-09 | 8.5E-08 |
| <i>LARGE2</i>    | LARGE xylosyl- and glucuronyltransferase 2                  | 1.8  | 4.3E-08 | 8.0E-07 |
| <i>LCK</i>       | LCK proto-oncogene, Src family tyrosine kinase              | 1.5  | 2.6E-06 | 2.0E-05 |
| <i>LCPI</i>      | lymphocyte cytosolic protein 1                              | -2.3 | 3.4E-12 | 1.6E-09 |
| <i>LEF1</i>      | lymphoid enhancer binding factor 1                          | -1.5 | 6.7E-07 | 6.5E-06 |
| <i>LGR5</i>      | leucine rich repeat containing G protein-coupled receptor 5 | -1.7 | 3.9E-09 | 1.3E-07 |
| <i>LIMCH1</i>    | LIM and calponin homology domains 1                         | 2.2  | 6.1E-10 | 3.8E-08 |
| <i>LIMS2</i>     | LIM zinc finger domain containing 2                         | 1.7  | 3.1E-09 | 1.2E-07 |
| <i>LINC00346</i> | long intergenic non-protein coding RNA 346                  | 1.5  | 8.0E-07 | 7.4E-06 |
| <i>LINC01133</i> | long intergenic non-protein coding RNA 1133                 | 1.5  | 4.1E-06 | 2.8E-05 |
| <i>LITAF</i>     | lipopolysaccharide induced TNF factor                       | 3.1  | 1.1E-10 | 1.3E-08 |

|                     |                                                                 |      |         |         |
|---------------------|-----------------------------------------------------------------|------|---------|---------|
| <i>LOC100506123</i> | uncharacterized LOC100506123                                    | -1.6 | 1.4E-09 | 6.7E-08 |
| <i>LOC101927870</i> | uncharacterized LOC101927870                                    | 1.5  | 5.2E-09 | 1.6E-07 |
| <i>LOXL4</i>        | lysyl oxidase like 4                                            | 1.7  | 4.4E-12 | 1.8E-09 |
| <i>LRCH2</i>        | leucine rich repeats and calponin homology domain containing 2  | -2.4 | 3.7E-09 | 1.3E-07 |
| <i>LRIG1</i>        | leucine rich repeats and immunoglobulin like domains 1          | -2.0 | 1.6E-08 | 3.7E-07 |
| <i>LRP4</i>         | LDL receptor related protein 4                                  | -1.5 | 1.8E-05 | 9.3E-05 |
| <i>LRRN2</i>        | leucine rich repeat neuronal 2                                  | -1.5 | 8.3E-07 | 7.7E-06 |
| <i>MAGEH1</i>       | MAGE family member H1                                           | -1.9 | 1.1E-08 | 2.8E-07 |
| <i>MAP2</i>         | microtubule associated protein 2                                | -1.5 | 3.0E-08 | 6.0E-07 |
| <i>MAP3K15</i>      | mitogen-activated protein kinase kinase kinase 15               | -1.5 | 8.5E-09 | 2.3E-07 |
| <i>MARCH3</i>       | membrane associated ring-CH-type finger 3                       | 1.5  | 2.2E-06 | 1.7E-05 |
| <i>MARK1</i>        | microtubule affinity regulating kinase 1                        | -2.9 | 2.7E-10 | 2.2E-08 |
| <i>MCOLN3</i>       | mucolipin 3                                                     | -1.8 | 2.1E-06 | 1.7E-05 |
| <i>MCTP2</i>        | multiple C2 domains, transmembrane 2                            | -3.0 | 3.1E-10 | 2.3E-08 |
| <i>MEGF6</i>        | multiple EGF like domains 6                                     | 2.0  | 4.0E-12 | 1.7E-09 |
| <i>MEST</i>         | mesoderm specific transcript                                    | 1.7  | 7.0E-09 | 2.0E-07 |
| <i>MFAP3L</i>       | microfibrillar associated protein 3 like                        | -2.5 | 1.3E-09 | 6.3E-08 |
| <i>MIR31HG</i>      | MIR31 host gene                                                 | 1.7  | 2.4E-09 | 9.3E-08 |
| <i>MISP</i>         | mitotic spindle positioning                                     | 1.7  | 1.0E-10 | 1.2E-08 |
| <i>MLLT11</i>       | myeloid/lymphoid or mixed-lineage leukemia; translocated to, 11 | -3.2 | 3.1E-16 | 2.5E-12 |
| <i>MMRN1</i>        | multimerin 1                                                    | -1.8 | 1.1E-08 | 2.9E-07 |
| <i>MNI</i>          | meningioma (disrupted in balanced translocation) 1              | -2.6 | 1.2E-10 | 1.3E-08 |
| <i>MSX2</i>         | msh homeobox 2                                                  | -2.1 | 1.3E-08 | 3.3E-07 |
| <i>MTSS1</i>        | metastasis suppressor 1                                         | -1.5 | 4.2E-07 | 4.4E-06 |
| <i>MUC2</i>         | mucin 2, oligomeric mucus/gel-forming                           | 2.0  | 1.3E-08 | 3.3E-07 |
| <i>MUC3A</i>        | mucin 3A, cell surface associated                               | 3.7  | 7.5E-12 | 2.4E-09 |
| <i>MUC5B</i>        | mucin 5B, oligomeric mucus/gel-forming                          | 2.8  | 2.3E-09 | 9.2E-08 |
| <i>MUM1L1</i>       | MUM1 like 1                                                     | -3.5 | 1.1E-09 | 5.6E-08 |
| <i>MYT1</i>         | myelin transcription factor 1                                   | -1.6 | 4.8E-06 | 3.2E-05 |
| <i>NACAD</i>        | NAC alpha domain containing                                     | 2.9  | 4.0E-09 | 1.4E-07 |
| <i>NAPIL2</i>       | nucleosome assembly protein 1 like 2                            | -1.7 | 1.4E-11 | 3.3E-09 |
| <i>NAPIL6</i>       | nucleosome assembly protein 1 like 6                            | -1.8 | 2.0E-06 | 1.6E-05 |
| <i>NAV3</i>         | neuron navigator 3                                              | -1.6 | 4.3E-07 | 4.6E-06 |
| <i>NBEAP1</i>       | neurobeachin pseudogene 1                                       | -1.8 | 6.9E-07 | 6.6E-06 |
| <i>NCR3LG1</i>      | natural killer cell cytotoxicity receptor 3 ligand 1            | -1.7 | 8.9E-06 | 5.3E-05 |
| <i>NEK3</i>         | NIMA related kinase 3                                           | 2.0  | 1.4E-08 | 3.4E-07 |
| <i>NELL2</i>        | neural EGFL like 2                                              | -4.3 | 2.6E-12 | 1.5E-09 |
| <i>NEO1</i>         | neogenin 1                                                      | -1.5 | 3.2E-06 | 2.3E-05 |
| <i>NFASC</i>        | neurofascin                                                     | -2.3 | 7.1E-11 | 9.5E-09 |
| <i>NLGN1</i>        | neuroligin 1                                                    | -1.7 | 1.9E-06 | 1.5E-05 |
| <i>NLRCS5</i>       | NLR family CARD domain containing 5                             | -1.5 | 3.9E-07 | 4.2E-06 |
| <i>NOG</i>          | noggin                                                          | -1.5 | 1.3E-09 | 6.4E-08 |
| <i>NPR3</i>         | natriuretic peptide receptor 3                                  | 1.6  | 1.2E-07 | 1.7E-06 |

|                |                                                                          |      |         |         |
|----------------|--------------------------------------------------------------------------|------|---------|---------|
| <i>NPY1R</i>   | neuropeptide Y receptor Y1                                               | 1.9  | 3.0E-11 | 5.4E-09 |
| <i>NRXN3</i>   | neurexin 3                                                               | -1.9 | 1.2E-07 | 1.7E-06 |
| <i>NTSR1</i>   | neurotensin receptor 1 (high affinity)                                   | 4.0  | 1.4E-14 | 6.3E-11 |
| <i>NUDT10</i>  | nudix hydrolase 10                                                       | -2.6 | 9.7E-10 | 5.3E-08 |
| <i>NUDT11</i>  | nudix hydrolase 11                                                       | -4.9 | 2.4E-13 | 3.4E-10 |
| <i>OASL</i>    | 2'-5'-oligoadenylate synthetase like                                     | -1.6 | 1.8E-10 | 1.6E-08 |
| <i>OCLN</i>    | occludin                                                                 | 1.7  | 4.0E-09 | 1.4E-07 |
| <i>OPN3</i>    | opsin 3                                                                  | 1.5  | 5.9E-09 | 1.8E-07 |
| <i>OSBP2</i>   | oxysterol binding protein 2                                              | 1.8  | 1.5E-12 | 1.0E-09 |
| <i>OXTR</i>    | oxytocin receptor                                                        | 1.7  | 7.0E-12 | 2.3E-09 |
| <i>PALD1</i>   | phosphatase domain containing, paladin 1                                 | -2.2 | 2.0E-08 | 4.5E-07 |
| <i>PALM2</i>   | paralemmin 2                                                             | -2.1 | 5.0E-07 | 5.2E-06 |
| <i>PAQR8</i>   | progesterone and adipoQ receptor family member 8                         | 1.7  | 3.1E-09 | 1.1E-07 |
| <i>PARM1</i>   | prostate androgen-regulated mucin-like protein 1                         | -4.4 | 3.2E-12 | 1.5E-09 |
| <i>PARP8</i>   | poly(ADP-ribose) polymerase family member 8                              | -1.9 | 4.0E-09 | 1.4E-07 |
| <i>PCDH19</i>  | protocadherin 19                                                         | -1.7 | 2.0E-06 | 1.6E-05 |
| <i>PCDHGB2</i> | protocadherin gamma subfamily B, 2                                       | 1.7  | 3.4E-07 | 3.8E-06 |
| <i>PCSK5</i>   | proprotein convertase subtilisin/kexin type 5                            | -1.9 | 2.4E-07 | 2.9E-06 |
| <i>PCSK9</i>   | proprotein convertase subtilisin/kexin type 9                            | 1.7  | 4.8E-08 | 8.7E-07 |
| <i>PDGFA</i>   | platelet derived growth factor subunit A                                 | 1.6  | 1.9E-08 | 4.3E-07 |
| <i>PDLIM2</i>  | PDZ and LIM domain 2                                                     | 1.9  | 8.0E-09 | 2.3E-07 |
| <i>PELI2</i>   | pellino E3 ubiquitin protein ligase family member 2                      | -1.6 | 2.3E-06 | 1.8E-05 |
| <i>PI3</i>     | peptidase inhibitor 3                                                    | 1.7  | 5.8E-10 | 3.7E-08 |
| <i>PIANP</i>   | PILR alpha associated neural protein                                     | 1.6  | 8.1E-07 | 7.5E-06 |
| <i>PLAT</i>    | plasminogen activator, tissue type                                       | 1.8  | 1.9E-13 | 3.4E-10 |
| <i>PLBD1</i>   | phospholipase B domain containing 1                                      | -1.5 | 4.1E-06 | 2.8E-05 |
| <i>PLCH2</i>   | phospholipase C eta 2                                                    | 1.7  | 8.4E-10 | 4.8E-08 |
| <i>PLD5</i>    | phospholipase D family member 5                                          | -2.1 | 4.5E-08 | 8.2E-07 |
| <i>PLEKHG6</i> | pleckstrin homology and RhoGEF domain containing G6                      | 1.5  | 3.3E-06 | 2.3E-05 |
| <i>PLLP</i>    | plasmalipin                                                              | 1.5  | 9.7E-07 | 8.7E-06 |
| <i>PLXNA4</i>  | plexin A4                                                                | 2.6  | 1.9E-07 | 2.4E-06 |
| <i>POF1B</i>   | premature ovarian failure, 1B                                            | -1.5 | 1.6E-06 | 1.3E-05 |
| <i>POU3F2</i>  | POU class 3 homeobox 2                                                   | -3.6 | 2.7E-11 | 5.1E-09 |
| <i>PPL</i>     | periplakin                                                               | 2.2  | 1.7E-10 | 1.6E-08 |
| <i>PPP1R1B</i> | protein phosphatase 1 regulatory inhibitor subunit 1B                    | 3.2  | 5.9E-10 | 3.7E-08 |
| <i>PPP1R3G</i> | protein phosphatase 1 regulatory subunit 3G                              | 2.3  | 4.3E-09 | 1.4E-07 |
| <i>PPP2R2C</i> | protein phosphatase 2 regulatory subunit Bgamma                          | -4.9 | 1.9E-13 | 3.4E-10 |
| <i>PREX2</i>   | phosphatidylinositol-3,4,5-trisphosphate dependent Rac exchange factor 2 | -1.6 | 8.3E-07 | 7.7E-06 |
| <i>PRKXP1</i>  | protein kinase, X-linked, pseudogene 1                                   | -1.5 | 6.6E-06 | 4.2E-05 |
| <i>PRR15</i>   | proline rich 15                                                          | 1.8  | 4.8E-08 | 8.6E-07 |
| <i>PTGER2</i>  | prostaglandin E receptor 2                                               | 1.9  | 1.5E-09 | 6.9E-08 |

|                     |                                                          |      |         |         |
|---------------------|----------------------------------------------------------|------|---------|---------|
| <i>PTGFRN</i>       | prostaglandin F2 receptor inhibitor                      | -1.6 | 4.6E-10 | 3.2E-08 |
| <i>PTGS2</i>        | prostaglandin-endoperoxide synthase 2                    | 1.7  | 4.9E-07 | 5.1E-06 |
| <i>PTPN20</i>       | protein tyrosine phosphatase, non-receptor type 20       | 1.8  | 5.1E-08 | 9.0E-07 |
| <i>PTPRG</i>        | protein tyrosine phosphatase, receptor type G            | -2.5 | 5.3E-09 | 1.7E-07 |
| <i>RAB39B</i>       | RAB39B, member RAS oncogene family                       | -2.1 | 9.3E-08 | 1.4E-06 |
| <i>RASD1</i>        | ras related dexamethasone induced 1                      | 2.4  | 4.9E-09 | 1.6E-07 |
| <i>RASEF</i>        | RAS and EF-hand domain containing                        | -1.8 | 3.6E-07 | 4.0E-06 |
| <i>RASL11A</i>      | RAS like family 11 member A                              | 1.9  | 6.8E-11 | 9.2E-09 |
| <i>RBM11</i>        | RNA binding motif protein 11                             | -3.2 | 1.4E-10 | 1.5E-08 |
| <i>RBP4</i>         | retinol binding protein 4                                | 1.6  | 1.3E-11 | 3.2E-09 |
| <i>RCOR2</i>        | REST corepressor 2                                       | 1.6  | 1.3E-06 | 1.1E-05 |
| <i>REG4</i>         | regenerating family member 4                             | 2.2  | 5.1E-09 | 1.6E-07 |
| <i>RFTN1</i>        | raftlin, lipid raft linker 1                             | -1.8 | 6.6E-09 | 1.9E-07 |
| <i>RGAG4</i>        | retrotransposon gag domain containing 4                  | -1.6 | 5.0E-06 | 3.3E-05 |
| <i>RGCC</i>         | regulator of cell cycle                                  | 1.7  | 3.3E-06 | 2.3E-05 |
| <i>RHOU</i>         | ras homolog family member U                              | 1.7  | 1.5E-07 | 2.0E-06 |
| <i>RIMKLB</i>       | ribosomal modification protein rimK-like family member B | -1.6 | 1.5E-08 | 3.6E-07 |
| <i>RNASEL</i>       | ribonuclease L                                           | -2.4 | 1.4E-09 | 6.6E-08 |
| <i>RNF128</i>       | ring finger protein 128, E3 ubiquitin protein ligase     | -3.8 | 1.5E-11 | 3.5E-09 |
| <i>RNF152</i>       | ring finger protein 152                                  | -1.5 | 2.7E-06 | 2.0E-05 |
| <i>ROBO4</i>        | roundabout guidance receptor 4                           | -2.1 | 2.0E-11 | 4.1E-09 |
| <i>RPS6KA2</i>      | ribosomal protein S6 kinase A2                           | 1.5  | 6.3E-08 | 1.0E-06 |
| <i>RRAGD</i>        | Ras related GTP binding D                                | -3.0 | 8.0E-11 | 1.0E-08 |
| <i>RUNDC3B</i>      | RUN domain containing 3B                                 | -1.8 | 2.8E-06 | 2.0E-05 |
| <i>RYR2</i>         | ryanodine receptor 2                                     | -2.9 | 3.2E-09 | 1.2E-07 |
| <i>S100A2</i>       | S100 calcium binding protein A2                          | 2.1  | 5.4E-11 | 7.7E-09 |
| <i>S100A9</i>       | S100 calcium binding protein A9                          | -1.5 | 8.9E-06 | 5.3E-05 |
| <i>S100P</i>        | S100 calcium binding protein P                           | 1.9  | 9.6E-07 | 8.6E-06 |
| <i>SCIN</i>         | scinderin                                                | 1.5  | 7.2E-07 | 6.8E-06 |
| <i>SCN3A</i>        | sodium voltage-gated channel alpha subunit 3             | -1.9 | 2.4E-08 | 5.1E-07 |
| <i>SEMA3B</i>       | semaphorin 3B                                            | 1.9  | 3.4E-10 | 2.5E-08 |
| <i>SEMA6B</i>       | semaphorin 6B                                            | 2.3  | 5.3E-10 | 3.5E-08 |
| <i>SERPINA1</i>     | serpin family A member 1                                 | -2.1 | 3.2E-08 | 6.4E-07 |
| <i>SERPINB2</i>     | serpin family B member 2                                 | -2.9 | 2.4E-11 | 4.7E-09 |
| <i>SERTAD4</i>      | SERTA domain containing 4                                | -1.6 | 2.3E-06 | 1.7E-05 |
| <i>SESN3</i>        | sestrin 3                                                | -2.6 | 5.4E-10 | 3.5E-08 |
| <i>SGK494</i>       | uncharacterized serine/threonine-protein kinase SgK494   | -1.5 | 3.1E-08 | 6.2E-07 |
| <i>SH2D1B</i>       | SH2 domain containing 1B                                 | -2.2 | 1.5E-08 | 3.5E-07 |
| <i>SIRPB1</i>       | signal regulatory protein beta 1                         | -2.3 | 6.3E-11 | 8.7E-09 |
| <i>SIRPB2</i>       | signal regulatory protein beta 2                         | -1.6 | 3.2E-06 | 2.3E-05 |
| <i>SLC16A9</i>      | solute carrier family 16 member 9                        | 1.7  | 4.0E-11 | 6.5E-09 |
| <i>SLCIA3</i>       | solute carrier family 1 member 3                         | -3.7 | 4.2E-11 | 6.6E-09 |
| <i>SLC25A25-AS1</i> | SLC25A25 antisense RNA 1                                 | -1.5 | 3.2E-08 | 6.3E-07 |
| <i>SLC26A10</i>     | solute carrier family 26 member 10                       | -1.8 | 1.6E-10 | 1.6E-08 |
| <i>SLC26A5</i>      | solute carrier family 26 member 5                        | 1.5  | 1.4E-05 | 7.6E-05 |
| <i>SLC29A4</i>      | solute carrier family 29 member 4                        | 1.6  | 2.6E-08 | 5.4E-07 |



|                    |                                                                          |      |         |         |
|--------------------|--------------------------------------------------------------------------|------|---------|---------|
| <i>SLC38A11</i>    | solute carrier family 38 member 11                                       | 1.7  | 2.7E-07 | 3.2E-06 |
| <i>SLC44A5</i>     | solute carrier family 44 member 5                                        | -2.1 | 6.3E-08 | 1.1E-06 |
| <i>SLC47A1</i>     | solute carrier family 47 member 1                                        | 1.8  | 2.6E-07 | 3.1E-06 |
| <i>SLC6A11</i>     | solute carrier family 6 member 11                                        | -2.3 | 4.9E-08 | 8.8E-07 |
| <i>SLC7A8</i>      | solute carrier family 7 member 8                                         | -3.4 | 4.0E-10 | 2.8E-08 |
| <i>SLC9A2</i>      | solute carrier family 9 member A2                                        | -3.6 | 2.1E-11 | 4.2E-09 |
| <i>SLFN13</i>      | schlafen family member 13                                                | -2.3 | 2.9E-10 | 2.2E-08 |
| <i>SLITRK4</i>     | SLIT and NTRK like family member 4                                       | -1.8 | 1.7E-09 | 7.5E-08 |
| <i>SOD3</i>        | superoxide dismutase 3, extracellular                                    | 1.7  | 7.5E-09 | 2.1E-07 |
| <i>SPDEF</i>       | SAM pointed domain containing ETS transcription factor                   | 1.5  | 2.3E-10 | 2.0E-08 |
| <i>SPOCK3</i>      | sparc/osteonectin, cwcv and kazal-like domains proteoglycan (testican) 3 | 1.5  | 7.9E-08 | 1.3E-06 |
| <i>SPTB</i>        | spectrin beta, erythrocytic                                              | -1.7 | 1.0E-09 | 5.5E-08 |
| <i>SRPX</i>        | sushi repeat containing protein, X-linked                                | -1.5 | 1.2E-09 | 6.1E-08 |
| <i>ST6GALI</i>     | ST6 beta-galactoside alpha-2,6-sialyltransferase 1                       | -3.8 | 2.8E-12 | 1.5E-09 |
| <i>ST6GAL2</i>     | ST6 beta-galactoside alpha-2,6-sialyltransferase 2                       | 2.0  | 9.2E-09 | 2.5E-07 |
| <i>ST6GALNAC2</i>  | ST6 N-acetylgalactosaminide alpha-2,6-sialyltransferase 2                | 2.4  | 1.6E-09 | 7.2E-08 |
| <i>STARD8</i>      | StAR related lipid transfer domain containing 8                          | -1.8 | 1.7E-07 | 2.2E-06 |
| <i>STAT6</i>       | signal transducer and activator of transcription 6                       | 1.9  | 1.3E-11 | 3.2E-09 |
| <i>STC1</i>        | stanniocalcin 1                                                          | -1.5 | 4.5E-08 | 8.3E-07 |
| <i>STMN3</i>       | stathmin 3                                                               | 1.5  | 3.8E-08 | 7.3E-07 |
| <i>STOX2</i>       | storkhead box 2                                                          | -2.6 | 5.3E-09 | 1.7E-07 |
| <i>SUSD3</i>       | sushi domain containing 3                                                | 1.8  | 1.9E-07 | 2.5E-06 |
| <i>SYT14</i>       | synaptotagmin 14                                                         | -2.2 | 1.0E-07 | 1.5E-06 |
| <i>TACSTD2</i>     | tumor-associated calcium signal transducer 2                             | -2.0 | 3.0E-09 | 1.1E-07 |
| <i>TAGLN3</i>      | transgelin 3                                                             | -1.5 | 5.2E-09 | 1.6E-07 |
| <i>TBC1D30</i>     | TBC1 domain family member 30                                             | -1.8 | 7.1E-08 | 1.2E-06 |
| <i>TCN1</i>        | transcobalamin 1                                                         | -5.4 | 1.7E-13 | 3.4E-10 |
| <i>TDO2</i>        | tryptophan 2,3-dioxygenase                                               | -2.0 | 1.3E-06 | 1.1E-05 |
| <i>TENM1</i>       | teneurin transmembrane protein 1                                         | -1.8 | 7.8E-09 | 2.2E-07 |
| <i>TFF1</i>        | trefoil factor 1                                                         | 3.6  | 5.2E-12 | 1.9E-09 |
| <i>TFF2</i>        | trefoil factor 2                                                         | 3.4  | 3.4E-10 | 2.5E-08 |
| <i>TGFB1</i>       | transforming growth factor beta induced                                  | -1.6 | 2.2E-07 | 2.7E-06 |
| <i>THBS1</i>       | thrombospondin 1                                                         | 1.5  | 5.5E-09 | 1.7E-07 |
| <i>TLR3</i>        | toll like receptor 3                                                     | -1.9 | 2.1E-07 | 2.6E-06 |
| <i>TMC6</i>        | transmembrane channel like 6                                             | 1.7  | 2.4E-09 | 9.3E-08 |
| <i>TMEM108-AS1</i> | TMEM108 antisense RNA 1                                                  | -3.1 | 9.8E-11 | 1.2E-08 |
| <i>TMEM229B</i>    | transmembrane protein 229B                                               | -1.5 | 8.4E-08 | 1.3E-06 |
| <i>TMEM27</i>      | transmembrane protein 27                                                 | -1.7 | 4.4E-11 | 6.8E-09 |
| <i>TMEM74</i>      | transmembrane protein 74                                                 | -1.8 | 1.7E-07 | 2.2E-06 |
| <i>TMOD2</i>       | tropomodulin 2                                                           | -2.3 | 3.0E-10 | 2.3E-08 |
| <i>TMPRSS15</i>    | transmembrane protease, serine 15                                        | 2.4  | 2.8E-08 | 5.7E-07 |
| <i>TMPRSS3</i>     | transmembrane protease, serine 3                                         | 2.1  | 3.3E-07 | 3.8E-06 |
| <i>TMX4</i>        | thioredoxin related transmembrane protein 4                              | -1.7 | 8.7E-12 | 2.6E-09 |

|                  |                                                       |      |         |         |
|------------------|-------------------------------------------------------|------|---------|---------|
| <i>TNFRSF11B</i> | tumor necrosis factor receptor superfamily member 11b | -1.9 | 8.9E-08 | 1.4E-06 |
| <i>TNFRSF14</i>  | tumor necrosis factor receptor superfamily member 14  | 1.7  | 1.0E-08 | 2.7E-07 |
| <i>TNFSF9</i>    | tumor necrosis factor superfamily member 9            | -1.5 | 1.5E-07 | 2.0E-06 |
| <i>TNXB</i>      | tenascin XB                                           | 2.6  | 2.8E-10 | 2.2E-08 |
| <i>TP53I11</i>   | tumor protein p53 inducible protein 11                | 2.5  | 1.0E-08 | 2.7E-07 |
| <i>TPTE</i>      | transmembrane phosphatase with tensin homology        | -2.1 | 2.4E-08 | 5.1E-07 |
| <i>TSPEAR</i>    | thrombospondin type laminin G domain and EAR repeats  | 1.9  | 3.8E-08 | 7.2E-07 |
| <i>TSPOAP1</i>   | TSPO associated protein 1                             | 1.7  | 4.7E-07 | 4.9E-06 |
| <i>TTC3P1</i>    | tetratricopeptide repeat domain 3 pseudogene 1        | -1.8 | 9.6E-08 | 1.5E-06 |
| <i>TTC9</i>      | tetratricopeptide repeat domain 9                     | 1.6  | 6.7E-07 | 6.5E-06 |
| <i>UBE2QL1</i>   | ubiquitin conjugating enzyme E2 Q family like 1       | -2.4 | 1.3E-11 | 3.2E-09 |
| <i>UNC80</i>     | unc-80 homolog, NALCN activator                       | -3.6 | 3.0E-11 | 5.4E-09 |
| <i>VASH1</i>     | vasohibin 1                                           | -1.6 | 2.8E-10 | 2.2E-08 |
| <i>VAV3</i>      | vav guanine nucleotide exchange factor 3              | -1.6 | 2.5E-07 | 3.0E-06 |
| <i>VSTM2L</i>    | V-set and transmembrane domain containing 2 like      | 2.0  | 1.2E-08 | 3.1E-07 |
| <i>VWA5A</i>     | von Willebrand factor A domain containing 5A          | -3.4 | 1.5E-10 | 1.6E-08 |
| <i>WDR72</i>     | WD repeat domain 72                                   | -3.2 | 3.7E-11 | 6.2E-09 |
| <i>WNT2B</i>     | Wnt family member 2B                                  | -1.5 | 2.1E-06 | 1.7E-05 |
| <i>YPEL2</i>     | yippee like 2                                         | -1.5 | 1.7E-07 | 2.3E-06 |
| <i>ZFPM2</i>     | zinc finger protein, FOG family member 2              | -3.8 | 5.1E-12 | 1.9E-09 |
| <i>ZG16B</i>     | zymogen granule protein 16B                           | 1.6  | 8.2E-08 | 1.3E-06 |
| <i>ZNF334</i>    | zinc finger protein 334                               | 3.1  | 4.5E-09 | 1.5E-07 |
| <i>ZNF415</i>    | zinc finger protein 415                               | 2.5  | 2.0E-10 | 1.8E-08 |
| <i>ZNF43</i>     | zinc finger protein 43                                | 2.0  | 2.5E-07 | 3.0E-06 |
| <i>ZNF467</i>    | zinc finger protein 467                               | 3.5  | 1.7E-10 | 1.6E-08 |
| <i>ZNF470</i>    | zinc finger protein 470                               | 2.5  | 5.3E-09 | 1.7E-07 |
| <i>ZNF521</i>    | zinc finger protein 521                               | -1.5 | 7.8E-07 | 7.3E-06 |
| <i>ZNF585B</i>   | zinc finger protein 585B                              | -2.3 | 2.9E-08 | 5.9E-07 |
| <i>ZNF607</i>    | zinc finger protein 607                               | 2.4  | 3.0E-09 | 1.1E-07 |
| <i>ZNF702P</i>   | zinc finger protein 702, pseudogene                   | 2.2  | 3.2E-09 | 1.2E-07 |
| <i>ZNF818P</i>   | zinc finger protein 818, pseudogene                   | 2.0  | 1.5E-07 | 2.0E-06 |
| <i>ZNF85</i>     | zinc finger protein 85                                | 3.9  | 1.6E-11 | 3.5E-09 |



**Supplementary Table S4. Enrichment for GO terms in the category ‘biological process’ for genes upregulated in PC3-GHSROS cells (compared to empty-vector control).  $P \leq 0.01$ , Fisher's exact test.**

| GO term    | Description                                             | Count | %    | Genes                                                                                                                            | Fold Enrichment | Fisher Exact P-value |
|------------|---------------------------------------------------------|-------|------|----------------------------------------------------------------------------------------------------------------------------------|-----------------|----------------------|
| GO:0010669 | epithelial structure maintenance                        | 4     | 2.6  | <i>MUC2, RBP4, MUC3A, TFF1</i>                                                                                                   | 70              | 1.1E-07              |
| GO:0030277 | maintenance of gastrointestinal epithelium              | 4     | 2.6  | <i>MUC2, RBP4, MUC3A, TFF1</i>                                                                                                   | 70              | 1.1E-07              |
| GO:0070482 | response to oxygen levels                               | 9     | 5.9  | <i>PLAT, CAV1, CA9, PDGFA, OXTR, CD24, THBS1, SOD3, ANGPTL4</i>                                                                  | 7               | 7.5E-06              |
| GO:0009725 | response to hormone stimulus                            | 13    | 8.5  | <i>RBP4, CAV1, PTGS2, PDGFA, FBP1, OXTR, NPY1R, ABCG1, CA9, PCSK9, CD24, TFF1, THBS1</i>                                         | 4               | 4.4E-05              |
| GO:0001666 | response to hypoxia                                     | 8     | 5.2  | <i>PLAT, CAV1, CA9, PDGFA, CD24, THBS1, SOD3, ANGPTL4</i>                                                                        | 6               | 4.0E-05              |
| GO:0022600 | digestive system process                                | 5     | 3.3  | <i>MUC2, RBP4, MUC3A, OXTR, TFF1</i>                                                                                             | 16              | 1.6E-05              |
| GO:0009719 | response to endogenous stimulus                         | 13    | 8.5  | <i>RBP4, CAV1, PTGS2, PDGFA, FBP1, OXTR, NPY1R, ABCG1, CA9, PCSK9, CD24, TFF1, THBS1</i>                                         | 3               | 1.2E-04              |
| GO:0048545 | response to steroid hormone stimulus                    | 9     | 5.9  | <i>CAV1, PTGS2, CA9, PDGFA, OXTR, TFF1, NPY1R, CD24, THBS1</i>                                                                   | 5               | 8.6E-05              |
| GO:0043627 | response to estrogen stimulus                           | 7     | 4.6  |                                                                                                                                  | 7               | 6.1E-05              |
| GO:0008285 | negative regulation of cell proliferation               | 12    | 7.8  | <i>MUC2, RBP4, CAV1, TP53111, IFITM1, PTGS2, IGFBP6, SCIN, TNFRSF14, CD24, THBS1, IGFBP5</i>                                     | 4               | 1.6E-04              |
| GO:0051241 | negative regulation of multicellular organismal process | 8     | 5.2  | <i>RBP4, CAV1, ACHE, PTGS2, PDGFA, PCSK9, CD24, THBS1</i>                                                                        | 5               | 1.6E-04              |
| GO:0042493 | response to drug                                        | 9     | 5.9  | <i>CAV1, PTGS2, CA9, PDGFA, LCK, OXTR, CDH1, CDH3, SLC47A1</i>                                                                   | 4               | 2.1E-04              |
| GO:0032355 | response to estradiol stimulus                          | 5     | 3.3  | <i>PTGS2, PDGFA, OXTR, TFF1, NPY1R</i>                                                                                           | 10              | 1.5E-04              |
| GO:0007586 | digestion                                               | 6     | 3.9  | <i>MUC2, RBP4, MUC3A, TFF2, OXTR, TFF1</i>                                                                                       | 7               | 2.2E-04              |
| GO:0042127 | regulation of cell proliferation                        | 17    | 11.1 | <i>MUC2, RBP4, CAV1, PTGER2, TP53111, PTGS2, IFITM1, CXCL5, PDGFA, CRIP2, IGFBP6, TNFRSF14, STAT6, SCIN, CD24, THBS1, IGFBP5</i> | 2               | 1.2E-03              |

|            |                                                 |    |      |                                                                                                                |    |         |
|------------|-------------------------------------------------|----|------|----------------------------------------------------------------------------------------------------------------|----|---------|
| GO:0010033 | response to organic substance                   | 16 | 10.5 | <i>RBP4, CAV1, PTGS2, PDGFA, FBP1, OXTR, CDH1, NPY1R, ABCG1, STAT6, CA9, PCSK9, CREB3L1, CD24, TFF1, THBS1</i> | 2  | 1.3E-03 |
| GO:0031644 | regulation of neurological system process       | 7  | 4.6  | <i>PLAT, ACHE, S100P, PTGS2, GRIN2D, OXTR, CALB1</i>                                                           | 5  | 6.2E-04 |
| GO:0050730 | regulation of peptidyl-tyrosine phosphorylation | 5  | 3.3  | <i>CAVI, PDGFA, TNFRSF14, ITGB2, CD24</i>                                                                      | 8  | 4.5E-04 |
| GO:0007267 | cell-cell signaling                             | 14 | 9.2  | <i>PLAT, GUCA1B, ACHE, CXCL5, PDGFA, OXTR, ITGB2, NTSR1, GRIN2D, GRID2, CEACAM6, SEMA3B, CD24, GDF15</i>       | 2  | 1.6E-03 |
| GO:0042632 | cholesterol homeostasis                         | 4  | 2.6  | <i>CAVI, PCSK9, CD24, ABCG1</i>                                                                                | 11 | 4.4E-04 |
| GO:0055092 | sterol homeostasis                              | 4  | 2.6  | <i>CAVI, PCSK9, CD24, ABCG1</i>                                                                                | 11 | 4.4E-04 |
| GO:0007155 | cell adhesion                                   | 15 | 9.8  | <i>CLDN7, ACHE, CADM4, TNXB, ITGB4, ITGB2, CDH1, CDH3, PCDHGB2, COL5A1, JUP, CD24, ADAM8, THBS1, MUC5B</i>     | 2  | 2.5E-03 |
| GO:0022610 | biological adhesion                             | 15 | 9.8  | <i>CLDN7, ACHE, CADM4, TNXB, ITGB4, ITGB2, CDH1, CDH3, PCDHGB2, COL5A1, JUP, CD24, ADAM8, THBS1, MUC5B</i>     | 2  | 2.6E-03 |
| GO:0045907 | positive regulation of vasoconstriction         | 3  | 2.0  | <i>CAVI, PTGS2, NPY1R</i>                                                                                      | 24 | 2.2E-04 |
| GO:0035249 | synaptic transmission, glutamatergic            | 3  | 2.0  | <i>PLAT, GRIN2D, GRID2</i>                                                                                     | 23 | 2.8E-04 |
| GO:0044057 | regulation of system process                    | 9  | 5.9  | <i>PLAT, CAVI, ACHE, S100P, PTGS2, GRIN2D, OXTR, NPY1R, CALB1</i>                                              | 3  | 2.7E-03 |
| GO:0048878 | chemical homeostasis                            | 12 | 7.8  | <i>RBP4, CAV1, LCK, GRID2, PCSK9, OXTR, PLLP, NPY1R, CD24, ABCG1, TMPRSS3, CKB</i>                             | 2  | 3.4E-03 |
| GO:0050804 | regulation of synaptic transmission             | 6  | 3.9  | <i>PLAT, ACHE, S100P, PTGS2, OXTR, CALB1</i>                                                                   | 5  | 1.8E-03 |
| GO:0042592 | homeostatic process                             | 15 | 9.8  | <i>RBP4, MUC2, CAVI, OXTR, NPY1R, TMPRSS3, ABCG1, CKB, MUC3A, LCK, GRID2, PCSK9, PLLP, CD24, TFF1</i>          | 2  | 4.9E-03 |

|            |                                             |    |     |                                                                                      |    |         |
|------------|---------------------------------------------|----|-----|--------------------------------------------------------------------------------------|----|---------|
| GO:0055088 | lipid homeostasis                           | 4  | 2.6 | <i>CAVI, PCSK9, CD24, ABCG1</i>                                                      | 8  | 1.4E-03 |
| GO:0051969 | regulation of transmission of nerve impulse | 6  | 3.9 | <i>PLAT, ACHE, S100P, PTGS2, OXTR, CALB1</i>                                         | 4  | 2.7E-03 |
| GO:0007610 | behavior                                    | 11 | 7.2 | <i>S100P, PTGS2, CXCL5, PDGFA, PPP1R1B, GRIN2D, OXTR, ITGB2, NPY1R, NTSR1, CALB1</i> | 2  | 4.9E-03 |
| GO:0032570 | response to progesterone stimulus           | 3  | 2.0 | <i>CAVI, OXTR, THBS1</i>                                                             | 16 | 8.4E-04 |
| GO:0016337 | cell-cell adhesion                          | 8  | 5.2 | <i>JUP, CLDN7, CDH1, ITGB2, CD24, ADAM8, CDH3, PCDHGB2</i>                           | 3  | 4.7E-03 |
| GO:0032101 | regulation of response to external stimulus | 6  | 3.9 | <i>CAVI, PTGS2, PDGFA, GRID2, CD24, THBS1</i>                                        | 4  | 4.0E-03 |
| GO:0051050 | positive regulation of transport            | 7  | 4.6 | <i>RBP4, CAVI, ACHE, SCIN, PCSK9, OXTR, CDH1</i>                                     | 3  | 5.3E-03 |
| GO:0001894 | tissue homeostasis                          | 4  | 2.6 | <i>MUC2, RBP4, MUC3A, TFF1</i>                                                       | 7  | 3.0E-03 |
| GO:0048167 | regulation of synaptic plasticity           | 4  | 2.6 | <i>PLAT, S100P, PTGS2, CALB1</i>                                                     | 7  | 3.1E-03 |
| GO:0033273 | response to vitamin                         | 4  | 2.6 | <i>RBP4, PTGS2, PDGFA, MEST</i>                                                      | 6  | 3.5E-03 |
| GO:0050865 | regulation of cell activation               | 6  | 3.9 | <i>STAT6, PDGFA, LCK, TNFRSF14, CD24, THBS1</i>                                      | 4  | 6.4E-03 |
| GO:0006873 | cellular ion homeostasis                    | 9  | 5.9 | <i>CAVI, LCK, GRID2, OXTR, PLLP, NPY1R, CD24, TMPRSS3, CKB</i>                       | 3  | 9.1E-03 |
| GO:0051480 | cytosolic calcium ion homeostasis           | 5  | 3.3 | <i>CAVI, LCK, OXTR, NPY1R, CD24</i>                                                  | 4  | 5.2E-03 |
| GO:0007618 | mating                                      | 3  | 2.0 | <i>PPP1R1B, PI3, OXTR</i>                                                            | 12 | 2.0E-03 |
| GO:0055082 | cellular chemical homeostasis               | 9  | 5.9 | <i>CAVI, LCK, GRID2, OXTR, PLLP, NPY1R, CD24, TMPRSS3, CKB</i>                       | 3  | 1.0E-02 |
| GO:0001568 | blood vessel development                    | 7  | 4.6 | <i>PLAT, CAVI, PDGFA, CCBE1, THBS1, COL5A1, ANGPTL4</i>                              | 3  | 8.7E-03 |
| GO:0010648 | negative regulation of cell communication   | 7  | 4.6 | <i>CBLC, CAVI, ACHE, PTGS2, STMN3, THBS1, IGFBP5</i>                                 | 3  | 9.3E-03 |
| GO:0008544 | epidermis development                       | 6  | 3.9 | <i>PTGS2, PDGFA, PPL, CRABP2, GJB3, COL5A1</i>                                       | 3  | 8.1E-03 |
| GO:0043588 | skin development                            | 3  | 2.0 | <i>PDGFA, GJB3, COL5A1</i>                                                           | 11 | 2.5E-03 |
| GO:0001944 | vasculature development                     | 7  | 4.6 | <i>PLAT, CAVI, PDGFA, CCBE1, THBS1, COL5A1, ANGPTL4</i>                              | 3  | 9.9E-03 |
| GO:0010038 | response to metal ion                       | 5  | 3.3 | <i>CAVI, PTGS2, TFF1, THBS1, SOD3</i>                                                | 4  | 7.6E-03 |
| GO:0007270 | nerve-nerve synaptic transmission           | 3  | 2.0 | <i>PLAT, GRIN2D, GRID2</i>                                                           | 10 | 3.1E-03 |

|            |                                           |   |     |                                                           |    |         |
|------------|-------------------------------------------|---|-----|-----------------------------------------------------------|----|---------|
| GO:0006875 | cellular metal ion homeostasis            | 6 | 3.9 | <i>CAVI, LCK, OXTR, NPY1R, CD24, TMPRSS3</i>              | 3  | 1.1E-02 |
| GO:0044092 | negative regulation of molecular function | 8 | 5.2 | <i>CBLC, CAVI, GNAI1, HR, PCSK9, NPY1R, NPR3, ANGPTL4</i> | 3  | 1.4E-02 |
| GO:0031667 | response to nutrient levels               | 6 | 3.9 | <i>RBP4, CAVI, PTGS2, PDGFA, PCSK9, MEST</i>              | 3  | 1.1E-02 |
| GO:0032526 | response to retinoic acid                 | 3 | 2.0 | <i>RBP4, PDGFA, MEST</i>                                  | 10 | 3.7E-03 |

**Supplementary Table S5. Enrichment for GO terms in the category ‘biological process’ for genes downregulated in PC3-GHSROS cells (compared to empty-vector control).  $P \leq 0.01$ , Fisher's exact test.**

| GO term    | Description                                    | Count | %   | Genes                                                                                                                                                                  | Fold Enrichment | Fisher Exact P-value |
|------------|------------------------------------------------|-------|-----|------------------------------------------------------------------------------------------------------------------------------------------------------------------------|-----------------|----------------------|
| GO:0007155 | cell adhesion                                  | 22    | 1.1 | <i>MTSSI, COL21A1, ADAM23, NRXN3, LRRN2, NELL2, NLGN1, NFASC, LEF1, NEO1, MMRN1, CXADR, PCDH19, CDH12, LAMA1, SRPX, LAMC3, CD33, TGFBI, CNTN1, FCGBP, CXADRP2, EDA</i> | 3               | 5.8E-06              |
| GO:0022610 | biological adhesion                            | 22    | 1.1 | <i>MTSSI, COL21A1, ADAM23, NRXN3, LRRN2, NELL2, NLGN1, NFASC, LEF1, NEO1, MMRN1, CXADR, PCDH19, CDH12, LAMA1, SRPX, LAMC3, CD33, TGFBI, CNTN1, FCGBP, CXADRP2, EDA</i> | 3               | 6.0E-06              |
| GO:0007267 | cell-cell signaling                            | 16    | 0.8 | <i>AR, NRXN3, S100A9, NLGN1, CD70, FGF13, GAL, TNFSF9, SLC1A3, KCNN3, HTR7, CD33, DMD, TMOD2, STC1, PCSK5</i>                                                          | 2               | 7.6E-04              |
| GO:0000904 | cell morphogenesis involved in differentiation | 9     | 0.4 | <i>NOG, SLITRK4, SLC1A3, NRXN3, KIF5C, NFASC, EOMES, LEF1, EPHB2</i>                                                                                                   | 3               | 1.3E-03              |
| GO:0000902 | cell morphogenesis                             | 11    | 0.5 | <i>LAMA1, NOG, SLITRK4, SLC1A3, NRXN3, DMD, KIF5C, NFASC, EOMES, LEF1, EPHB2</i>                                                                                       | 3               | 1.7E-03              |
| GO:0001655 | urogenital system development                  | 6     | 0.3 | <i>AGTR1, EYA1, AR, NOG, LEF1, PCSK5</i>                                                                                                                               | 5               | 1.2E-03              |
| GO:0043009 | chordate embryonic development                 | 10    | 0.5 | <i>EYA1, AR, NOG, CHD7, ARNT2,</i>                                                                                                                                     | 3               | 3.2E-03              |



|            |                                                       |    |     |                                                                                              |    |         |
|------------|-------------------------------------------------------|----|-----|----------------------------------------------------------------------------------------------|----|---------|
|            |                                                       |    |     | <i>EOMES, LEF1, AMOT, ZFPM2, PCSK5</i>                                                       |    |         |
| GO:0009792 | embryonic development ending in birth or egg hatching | 10 | 0.5 | <i>EYA1, AR, NOG, CHD7, ARNT2, EOMES, LEF1, AMOT, ZFPM2, PCSK5</i>                           | 3  | 3.4E-03 |
| GO:0032989 | cellular component morphogenesis                      | 11 | 0.5 | <i>LAMA1, NOG, SLITRK4, SLC1A3, NRXN3, DMD, KIF5C, NFASC, EOMES, LEF1, EPHB2</i>             | 3  | 3.8E-03 |
| GO:0030509 | BMP signaling pathway                                 | 4  | 0.2 | <i>MSX2, NOG, CHRDL1, BMP6</i>                                                               | 8  | 1.3E-03 |
| GO:0006928 | cell motion                                           | 12 | 0.6 | <i>LAMA1, MTSS1, VAV3, NRXN3, KIF5C, S100A9, NFASC, AMOT, POU3F2, DNAH5, EPHB2, ARHGDI1B</i> | 2  | 5.4E-03 |
| GO:0003013 | circulatory system process                            | 7  | 0.3 | <i>AGTR1, CHD7, HTR7, RYR2, AMOT, KCNJ12, PCSK5</i>                                          | 3  | 4.0E-03 |
| GO:0008015 | blood circulation                                     | 7  | 0.3 | <i>AGTR1, CHD7, HTR7, RYR2, AMOT, KCNJ12, PCSK5</i>                                          | 3  | 4.0E-03 |
| GO:0048732 | gland development                                     | 6  | 0.3 | <i>EYA1, AR, NOG, LEF1, POU3F2, EDA</i>                                                      | 4  | 3.4E-03 |
| GO:0001837 | epithelial to mesenchymal transition                  | 3  | 0.1 | <i>NOG, EOMES, LEF1</i>                                                                      | 15 | 8.9E-04 |
| GO:0021545 | cranial nerve development                             | 3  | 0.1 | <i>SLC1A3, CHD7, EPHB2</i>                                                                   | 15 | 1.1E-03 |
| GO:0030182 | neuron differentiation                                | 11 | 0.5 | <i>SLITRK4, SLC1A3, MCOLN3, NRXN3, DGKG, DMD, KIF5C, MAP2, NFASC, POU3F2, EPHB2</i>          | 2  | 7.9E-03 |
| GO:0001822 | kidney development                                    | 5  | 0.2 | <i>AGTR1, EYA1, NOG, LEF1, PCSK5</i>                                                         | 5  | 3.8E-03 |
| GO:0001501 | skeletal system development                           | 9  | 0.4 | <i>MSX2, EYA1, TNFRSF11B, NOG, CHD7, CHRDL1, STC1, PCSK5, BMP6</i>                           | 3  | 7.8E-03 |
| GO:0035108 | limb morphogenesis                                    | 5  | 0.2 | <i>MSX2, NOG, CHD7, LEF1, PCSK5</i>                                                          | 5  | 4.3E-03 |
| GO:0035107 | appendage morphogenesis                               | 5  | 0.2 | <i>MSX2, NOG, CHD7, LEF1, PCSK5</i>                                                          | 5  | 4.3E-03 |

|            |                               |   |     |                                                |    |         |
|------------|-------------------------------|---|-----|------------------------------------------------|----|---------|
| GO:0048736 | appendage development         | 5 | 0.2 | <i>MSX2, NOG, CHD7, LEF1, PCSK5</i>            | 4  | 5.1E-03 |
| GO:0060173 | limb development              | 5 | 0.2 | <i>MSX2, NOG, CHD7, LEF1, PCSK5</i>            | 4  | 5.1E-03 |
| GO:0043627 | response to estrogen stimulus | 5 | 0.2 | <i>TNFRSF11B, ARNT2, ANGPT1, SERPINA1, GAL</i> | 4  | 5.6E-03 |
| GO:0021675 | nerve development             | 3 | 0.1 | <i>SLC1A3, CHD7, EPHB2</i>                     | 11 | 2.4E-03 |

**Supplementary Table S6. OncoPrint concepts analysis of positively and negatively correlated PC3-GHSROS gene signature. Red: positively correlated gene signature; Black: negatively correlated gene signature.  $P \leq 0.01$ , Fisher's exact test.**

| Concept 1 ID | Concept 1 Name                                                               | Concept 2 ID | Concept 2 Name                                                               | P-value   | Odds Ratio | Overlap Size |
|--------------|------------------------------------------------------------------------------|--------------|------------------------------------------------------------------------------|-----------|------------|--------------|
| C41610       | PC3 GHSROS downregulated gene list                                           | 17697        | Cancer Type: Prostate Cancer - Top 10% Over-expressed (Bittner Multi-cancer) | 2.17E-08  | 3.7        | 32           |
| C41610       | PC3 GHSROS downregulated gene list                                           | 122189617    | Prostate Cancer - Metastasis - Top 10% Under-expressed (Taylor Prostate 3)   | 3.14E-06  | 3.1        | 28           |
| C41610       | PC3 GHSROS downregulated gene list                                           | 122210891    | Cancer Type: Prostate Cancer - Top 5% Under-expressed (Garnett CellLine)     | 3.94E-06  | 4.5        | 16           |
| C41610       | PC3 GHSROS downregulated gene list                                           | 122208916    | Cancer Type: Prostate Cancer - Top 5% Under-expressed (Barretina CellLine)   | 3.55E-05  | 3.5        | 17           |
| C41610       | PC3 GHSROS downregulated gene list                                           | 122213069    | Prostate Cancer - Metastasis - Top 5% Under-expressed (Grasso Prostate)      | 9.84E-05  | 3.3        | 16           |
| C41610       | PC3 GHSROS downregulated gene list                                           | 28483        | Prostate Cancer - Metastasis - Top 5% Under-expressed (Varambally Prostate)  | 4.13E-04  | 3          | 15           |
| C41610       | PC3 GHSROS downregulated gene list                                           | 23100        | Prostate Cancer - Metastasis - Top 10% Under-expressed (LaTulippe Prostate)  | 4.20E-04  | 3          | 16           |
| C41610       | PC3 GHSROS downregulated gene list                                           | 28344        | Prostate Cancer - Metastasis - Top 10% Under-expressed (Vanaja Prostate)     | 0.001     | 2.3        | 21           |
| 17697        | Cancer Type: Prostate Cancer - Top 10% Over-expressed (Bittner Multi-cancer) | 122189617    | Prostate Cancer - Metastasis - Top 10% Under-expressed (Taylor Prostate 3)   | 1.55E-120 | 4.2        | 559          |
| 17697        | Cancer Type: Prostate Cancer - Top 10% Over-expressed (Bittner Multi-cancer) | 122213069    | Prostate Cancer - Metastasis - Top 5% Under-expressed (Grasso Prostate)      | 1.33E-120 | 6.4        | 356          |
| 17697        | Cancer Type: Prostate Cancer - Top 10% Over-expressed (Bittner Multi-cancer) | 28483        | Prostate Cancer - Metastasis - Top 5% Under-expressed (Varambally Prostate)  | 3.67E-134 | 6.8        | 377          |
| 17697        | Cancer Type: Prostate Cancer - Top 10% Over-expressed (Bittner Multi-cancer) | 23100        | Prostate Cancer - Metastasis - Top 10% Under-expressed (LaTulippe Prostate)  | 1.22E-54  | 4.1        | 250          |
| 17697        | Cancer Type: Prostate Cancer - Top 10% Over-expressed (Bittner Multi-cancer) | 28344        | Prostate Cancer - Metastasis - Top 10% Under-expressed (Vanaja Prostate)     | 3.10E-189 | 6.1        | 619          |
| 122189617    | Prostate Cancer - Metastasis - Top 10% Under-expressed (Taylor Prostate 3)   | 122210891    | Cancer Type: Prostate Cancer - Top 5% Under-expressed (Garnett CellLine)     | 1.63E-12  | 2.1        | 143          |

|           |                                                                            |           |                                                                             |           |      |     |
|-----------|----------------------------------------------------------------------------|-----------|-----------------------------------------------------------------------------|-----------|------|-----|
| 122189617 | Prostate Cancer - Metastasis - Top 10% Under-expressed (Taylor Prostate 3) | 122208916 | Cancer Type: Prostate Cancer - Top 5% Under-expressed (Barretina CellLine)  | 1.94E-26  | 2.5  | 218 |
| 122189617 | Prostate Cancer - Metastasis - Top 10% Under-expressed (Taylor Prostate 3) | 122213069 | Prostate Cancer - Metastasis - Top 5% Under-expressed (Grasso Prostate)     | 6.85E-300 | 15.4 | 554 |
| 122189617 | Prostate Cancer - Metastasis - Top 10% Under-expressed (Taylor Prostate 3) | 28483     | Prostate Cancer - Metastasis - Top 5% Under-expressed (Varambally Prostate) | 1.26E-181 | 8.7  | 446 |
| 122189617 | Prostate Cancer - Metastasis - Top 10% Under-expressed (Taylor Prostate 3) | 23100     | Prostate Cancer - Metastasis - Top 10% Under-expressed (LaTulippe Prostate) | 7.69E-149 | 8.1  | 422 |
| 122189617 | Prostate Cancer - Metastasis - Top 10% Under-expressed (Taylor Prostate 3) | 28344     | Prostate Cancer - Metastasis - Top 10% Under-expressed (Vanaja Prostate)    | 1.66E-141 | 4.8  | 574 |
| 122210891 | Cancer Type: Prostate Cancer - Top 5% Under-expressed (Garnett CellLine)   | 122208916 | Cancer Type: Prostate Cancer - Top 5% Under-expressed (Barretina CellLine)  | 6.57E-135 | 13.7 | 232 |
| 122210891 | Cancer Type: Prostate Cancer - Top 5% Under-expressed (Garnett CellLine)   | 122213069 | Prostate Cancer - Metastasis - Top 5% Under-expressed (Grasso Prostate)     | 4.37E-06  | 1.9  | 65  |
| 122210891 | Cancer Type: Prostate Cancer - Top 5% Under-expressed (Garnett CellLine)   | 23100     | Prostate Cancer - Metastasis - Top 10% Under-expressed (LaTulippe Prostate) | 3.26E-04  | 1.6  | 73  |
| 122208916 | Cancer Type: Prostate Cancer - Top 5% Under-expressed (Barretina CellLine) | 122213069 | Prostate Cancer - Metastasis - Top 5% Under-expressed (Grasso Prostate)     | 9.74E-20  | 2.9  | 118 |
| 122208916 | Cancer Type: Prostate Cancer - Top 5% Under-expressed (Barretina CellLine) | 28483     | Prostate Cancer - Metastasis - Top 5% Under-expressed (Varambally Prostate) | 1.44E-09  | 2.1  | 93  |
| 122208916 | Cancer Type: Prostate Cancer - Top 5% Under-expressed (Barretina CellLine) | 23100     | Prostate Cancer - Metastasis - Top 10% Under-expressed (LaTulippe Prostate) | 1.04E-05  | 1.7  | 87  |
| 122213069 | Prostate Cancer - Metastasis - Top 5% Under-expressed (Grasso Prostate)    | 28483     | Prostate Cancer - Metastasis - Top 5% Under-expressed (Varambally Prostate) | 1.06E-199 | 14.8 | 332 |
| 122213069 | Prostate Cancer - Metastasis - Top 5% Under-expressed (Grasso Prostate)    | 23100     | Prostate Cancer - Metastasis - Top 10% Under-expressed (LaTulippe Prostate) | 5.82E-85  | 7.7  | 221 |
| 122213069 | Prostate Cancer - Metastasis - Top 5% Under-expressed (Grasso Prostate)    | 28344     | Prostate Cancer - Metastasis - Top 10% Under-expressed (Vanaja Prostate)    | 1.21E-75  | 4.7  | 288 |
| 28483     | Prostate Cancer - Metastasis - Top 5%                                      | 23100     | Prostate Cancer - Metastasis - Top 10%                                      | 1.59E-59  | 5.7  | 192 |

|           |                                                                                          |           |                                                                                          |          |      |     |
|-----------|------------------------------------------------------------------------------------------|-----------|------------------------------------------------------------------------------------------|----------|------|-----|
|           | Under-expressed (Varambally Prostate)                                                    |           | Under-expressed (LaTulippe Prostate)                                                     |          |      |     |
| 28483     | Prostate Cancer - Metastasis - Top 5% Under-expressed (Varambally Prostate)              | 28344     | Prostate Cancer - Metastasis - Top 10% Under-expressed (Vanaja Prostate)                 | 3.84E-80 | 4.7  | 302 |
| 23100     | Prostate Cancer - Metastasis - Top 10% Under-expressed (LaTulippe Prostate)              | 28344     | Prostate Cancer - Metastasis - Top 10% Under-expressed (Vanaja Prostate)                 | 2.79E-54 | 4    | 258 |
| C41610    | PC3 GHSROS downregulated gene list                                                       | 122199554 | Prostate Carcinoma - Dead at 3 Years - Top 10% Under-expressed (Setlur Prostate)         | 0.003    | 2.9  | 12  |
| C41610    | PC3 GHSROS downregulated gene list                                                       | 122189630 | Prostate Carcinoma - Advanced Gleason Score - Top 5% Under-expressed (Taylor Prostate 3) | 0.004    | 2.5  | 13  |
| C41610    | PC3 GHSROS downregulated gene list                                                       | 122189606 | Prostate Carcinoma - Recurrence at 5 Years - Top 5% Under-expressed (Taylor Prostate 3)  | 0.004    | 2.5  | 13  |
| 122199554 | Prostate Carcinoma - Dead at 3 Years - Top 10% Under-expressed (Setlur Prostate)         | 122189630 | Prostate Carcinoma - Advanced Gleason Score - Top 5% Under-expressed (Taylor Prostate 3) | 3.07E-37 | 4.7  | 141 |
| 122199554 | Prostate Carcinoma - Dead at 3 Years - Top 10% Under-expressed (Setlur Prostate)         | 122189606 | Prostate Carcinoma - Recurrence at 5 Years - Top 5% Under-expressed (Taylor Prostate 3)  | 3.29E-24 | 3.4  | 130 |
| 122189630 | Prostate Carcinoma - Advanced Gleason Score - Top 5% Under-expressed (Taylor Prostate 3) | 122189606 | Prostate Carcinoma - Recurrence at 5 Years - Top 5% Under-expressed (Taylor Prostate 3)  | 0.00E+00 | 26.5 | 493 |
| C41601    | PC3 GHSROS upregulated gene list_RNAseq                                                  | 29459     | Prostate Carcinoma vs. Normal - Top 1% Over-expressed (Yu Prostate)                      | 4.78E-04 | 12.5 | 4   |
| C41602    | PC3 GHSROS upregulated gene list_RNAseq                                                  | 122189633 | Prostate Carcinoma - Advanced N Stage - Top 5% Over-expressed (Taylor Prostate 3)        | 0.002    | 3.5  | 9   |
| C41603    | PC3 GHSROS upregulated gene list_RNAseq                                                  | 17807     | Prostate Adenocarcinoma - Advanced Stage - Top 1% Over-expressed (Bittner Prostate)      | 0.003    | 7.5  | 4   |
| C41604    | PC3 GHSROS upregulated gene list_RNAseq                                                  | 23091     | Prostate Carcinoma vs. Normal - Top 10% Over-expressed (LaTulippe Prostate)              | 0.003    | 3.4  | 10  |
| 29459     | Prostate Carcinoma vs. Normal - Top 1% Over-expressed (Yu Prostate)                      | 17807     | Prostate Adenocarcinoma - Advanced Stage - Top 1% Over-expressed (Bittner Prostate)      | 3.33E-04 | 7.2  | 6   |
| 29459     | Prostate Carcinoma vs. Normal - Top 1% Over-expressed (Yu Prostate)                      | 23091     | Prostate Carcinoma vs. Normal - Top 10% Over-expressed (LaTulippe Prostate)              | 5.61E-07 | 3.8  | 25  |
| 122189633 | Prostate Carcinoma - Advanced N Stage - Top 5% Over-                                     | 23091     | Prostate Carcinoma vs. Normal - Top 10% Over-                                            | 3.73E-06 | 2    | 61  |

|       |                                                                                     |       |                                                                             |          |     |    |
|-------|-------------------------------------------------------------------------------------|-------|-----------------------------------------------------------------------------|----------|-----|----|
|       | expressed (Taylor Prostate 3)                                                       |       | expressed (LaTulippe Prostate)                                              |          |     |    |
| 17807 | Prostate Adenocarcinoma - Advanced Stage - Top 1% Over-expressed (Bittner Prostate) | 23091 | Prostate Carcinoma vs. Normal - Top 10% Over-expressed (LaTulippe Prostate) | 6.07E-04 | 2.5 | 20 |

**Supplementary Table S7. Differentially expressed genes in PC3-GHSROS and LNCaP-GHSROS cells compared to the Grasso Oncomine dataset.** The Grasso dataset includes 59 localized and 35 metastatic prostate tumors. Red: higher expression in metastatic tumors; Black: lower expression in metastatic tumors. Fold-changes are log<sub>2</sub> transformed; *Q*-value denotes the false discovery rate (FDR; Benjamini-Hochberg)-adjusted *P*-value.

| <i>Gene Symbol</i> | <i>Gene Name</i>                               | <i>Reporter ID</i> | <i>Fold Change</i> | <i>P-value</i> | <i>Q-value</i> |
|--------------------|------------------------------------------------|--------------------|--------------------|----------------|----------------|
| AASS               | aminoadipate-semialdehyde synthase             | A_23_P8754         | -1.5               | 6.0E-03        | 2.5E-02        |
| <i>CHRD1</i>       | chordin-like 1                                 | A_24_P168925       | -48.0              | 3.6E-21        | 2.9E-18        |
| <i>CNTN1</i>       | contactin 1                                    | A_23_P204541       | -19.3              | 1.6E-16        | 3.4E-14        |
| <i>DIRAS1</i>      | DIRAS family, GTP-binding RAS-like 1           | A_23_P386942       | 2.2                | 3.5E-07        | 4.4E-06        |
| <i>FBXL16</i>      | F-box and leucine-rich repeat protein 16       | A_23_P406385       | 6.0                | 2.5E-08        | 4.7E-07        |
| <i>IFI16</i>       | interferon, gamma-inducible protein 16         | A_23_P160025       | -2.2               | 1.1E-05        | 8.8E-05        |
| <i>MUMIL1</i>      | melanoma associated antigen (mutated) 1-like 1 | A_23_P73571        | -8.8               | 7.9E-11        | 2.5E-09        |
| <i>TFF2</i>        | trefoil factor 2                               | A_23_P57364        | 1.3                | 6.4E-04        | 3.1E-03        |
| <i>TP53111</i>     | tumor protein p53 inducible protein 11         | A_23_P150281       | 1.5                | 4.8E-05        | 3.1E-04        |
| <i>ZNF467</i>      | zinc finger protein 467                        | A_23_P59470        | 3.5                | 5.4E-07        | 6.3E-06        |

**Supplementary Table S8. Differentially expressed genes in PC3-GHSROS and LNCaP-GHSROS cells compared to the Taylor Oncomine dataset.** The Taylor dataset includes 123 localized and 35 metastatic prostate tumors. Red: higher expression in metastatic tumors; Black: lower expression in metastatic tumors. Fold-changes are  $\log_2$  transformed;  $Q$ -value denotes the false discovery rate (FDR; Benjamini-Hochberg)-adjusted  $P$ -value.

| <i>Gene Symbol</i> | <b>Gene Name</b>                               | <b>Reported ID</b> | <b>Fold Change</b> | <b><i>P</i>-value</b> | <b><i>Q</i>-value</b> |
|--------------------|------------------------------------------------|--------------------|--------------------|-----------------------|-----------------------|
| <i>AASS</i>        | aminoadipate-semialdehyde synthase             | 10093              | -1.5               | 3.9E-05               | 1.7E-03               |
| <i>CHRD1</i>       | chordin-like 1                                 | 20828              | -5.0               | 1.6E-18               | 1.3E-15               |
| <i>CNTN1</i>       | contactin 1                                    | 6403               | -3.5               | 4.2E-22               | 6.8E-19               |
| <i>DIRAS1</i>      | DIRAS family, GTP-binding RAS-like 1           | 20799              | 1.1                | 1.2E-02               | 1.4E-01               |
| <i>FBXL16</i>      | F-box and leucine-rich repeat protein 16       | 21824              | 1.1                | 8.0E-03               | 1.2E-01               |
| <i>IFI16</i>       | interferon, gamma-inducible protein 16         | 9878               | -1.5               | 8.4E-05               | 3.3E-03               |
| <i>MUM1L1</i>      | melanoma associated antigen (mutated) 1-like 1 | 21313              | -1.3               | 1.0E-02               | 1.3E-01               |
| <i>TFF2</i>        | trefoil factor 2                               | 9774               | 1.1                | 3.6E-02               | 2.4E-01               |
| <i>TP53111</i>     | tumor protein p53 inducible protein 11         | 4038               | 1.1                | 2.2E-02               | 1.9E-01               |
| <i>ZNF467</i>      | zinc finger protein 467                        | 25037              | 1.3                | 2.8E-04               | 1.7E-02               |



**Supplementary Table S9. Disease-free survival (DFS) analysis of differentially expressed genes (in PC3-GHSROS cells, LNCaP-GHSROS cells and clinical metastatic tumors) in human datasets.** Patients, in the Taylor ( $N=150$ ;  $n=123$  localized and  $n=27$  metastatic tumors) and TCGA-PRAD ( $N=489$ ; localized tumors) datasets, were stratified into two groups by  $k$ -means clustering of gene expression ( $k=2$ ). The log-rank test, was used to assign statistical significance, with  $P \leq 0.05$  considered significant (shown in bold). The Cox  $P$ -value and absolute hazard ratio (HR) between  $k$ -means cluster 1 and 2 for each gene are indicated. Overall median disease-free survival (DFS) in days are indicated for each cluster.

| gene           | Taylor ( $N=150$ ) |               |             |                              |                              | TCGA-PRAD ( $N=489$ ) |                 |             |                              |                              |
|----------------|--------------------|---------------|-------------|------------------------------|------------------------------|-----------------------|-----------------|-------------|------------------------------|------------------------------|
|                | log-rank $P$       | Cox $P$       | Absolute HR | Overall median DFS cluster 1 | Overall median DFS cluster 2 | log-rank $P$          | Cox $P$         | Absolute HR | Overall median DFS cluster 1 | Overall median DFS cluster 2 |
| <i>ZNF467</i>  | <b>0.0027</b>      | <b>0.0039</b> | 2.7         | 174                          | 871                          | <b>0.000050</b>       | <b>0.000026</b> | 2.5         | 546                          | 685                          |
| <i>CHRD1</i>   | <b>0.0047</b>      | <b>0.0062</b> | 2.5         | 840                          | 402                          | <b>0.0079</b>         | <b>0.0071</b>   | 1.8         | 649                          | 640                          |
| <i>FBXL16</i>  | <b>0.017</b>       | <b>0.020</b>  | 2.2         | 300                          | 871                          | 0.089                 | 0.087           | 1.5         | 627                          | 663                          |
| <i>DIRAS1</i>  | 0.09               | 0.099         | 1.7         | 709                          | 329                          | <b>0.012</b>          | <b>0.011</b>    | 1.7         | 425                          | 723                          |
| <i>TFF2</i>    | 0.11               | 0.11          | 1.7         | 840                          | 125                          | 0.84                  | 0.089           | 1.1         | 648                          | 896                          |
| <i>CNTN1</i>   | 0.13               | 0.14          | 1.6         | 701                          | 457                          | 0.10                  | 0.094           | 1.4         | 627                          | 691                          |
| <i>IFI16</i>   | 0.27               | 0.28          | 1.5         | 579                          | 181                          | 0.95                  | 0.95            | 1.0         | 671                          | 648                          |
| <i>AASS</i>    | 0.62               | 0.63          | 1.2         | 843                          | 348                          | 0.35                  | 0.35            | 1.2         | 552                          | 697                          |
| <i>MUM1L1</i>  | 0.78               | 0.78          | 1.1         | 472                          | 676                          | 0.14                  | 0.14            | 1.4         | 765                          | 426                          |
| <i>TP53111</i> | 0.98               | 0.98          | 1.0         | 122                          | 843                          | 0.57                  | 0.57            | 1.1         | 533                          | 751                          |

**Supplementary Table S10. Overview of human Affymetrix exon array datasets interrogated.**

| resource            | unique ID     | tissue/cell type                                                                                       | type                         | N   | reference                    |
|---------------------|---------------|--------------------------------------------------------------------------------------------------------|------------------------------|-----|------------------------------|
| ArrayExpress        | E-MEXP-2644   | lung (18 benign and 18 cancer)                                                                         | tissues                      | 36  | <sup>68</sup>                |
| ArrayExpress        | E-MEXP-3931   | THP1 (acute monocytic leukemia)                                                                        | cell lines                   | 12  | <sup>69</sup>                |
| ArrayExpress        | E-MTAB-1273   | induced pluripotent stem (iPS) cells derived from glioblastoma-derived neural stem cells               | primary cells                | 16  | <sup>70</sup>                |
| ArrayExpress        | E-MTAB-2471   | large B-cell lymphoma                                                                                  | tissues                      | 16  | <sup>71</sup>                |
| Affymetrix web site | goo.gl/rBWrFv | breast, cerebellum, heart, kidney, liver, muscle, pancreas, prostate, spleen, testes, thyroid, mixture | tissues                      | 53  | -                            |
| Affymetrix web site | goo.gl/Yack5K | colon cancer (10 benign and 10 cancer)                                                                 | tissues                      | 20  | -                            |
| GEO                 | GSE11967      | thymus (4 benign and 4 cancer)                                                                         | tissues                      | 8   | <sup>72</sup>                |
| GEO                 | GSE16732      | breast (cancer)                                                                                        | cell lines                   | 41  | <sup>73</sup>                |
| GEO                 | GSE18927      | NIH Epigenomics Roadmap Initiative (stem cells and primary <i>ex vivo</i> tissues)                     | tissues and primary cells    | 99  | <sup>74,75,76,77,78,79</sup> |
| GEO                 | GSE19090      | ENCODE Project Consortium (84 cell lines and primary cells)                                            | cell lines and primary cells | 182 | <sup>80,81</sup>             |
| GEO                 | GSE19891      | HeLa (cervical cancer)                                                                                 | cell lines                   | 15  | <sup>82</sup>                |
| GEO                 | GSE20342      | MCF7 (breast cancer)                                                                                   | cell lines                   | 32  | <sup>83</sup>                |
| GEO                 | GSE20567      | HL60, THP-1, U937 (myeloid leukemia)                                                                   | cell lines                   | 17  | <sup>84</sup>                |
| GEO                 | GSE21034      | prostate (cancer)                                                                                      | tissues                      | 310 | <sup>36</sup>                |
| GEO                 | GSE21163      | pancreas (1 benign and 6 cancer)                                                                       | cell lines                   | 22  | <sup>85,86</sup>             |
| GEO                 | GSE21337      | acute myeloid leukemia                                                                                 | tissues                      | 64  | <sup>87</sup>                |
| GEO                 | GSE21840      | MCF7 (breast cancer)                                                                                   | cell lines                   | 6   | <sup>87,89</sup>             |
| GEO                 | GSE23361      | lung (cancer)                                                                                          | tissues                      | 12  | <sup>90</sup>                |
| GEO                 | GSE23514      | HeLa S3 (cervical cancer)                                                                              | cell lines                   | 12  | <sup>91</sup>                |
| GEO                 | GSE23768      | breast, lung, ovarian and prostate cancer                                                              | tissues                      | 153 | <sup>92</sup>                |
| GEO                 | GSE24778      | K562 (chronic myelogenous leukemia)                                                                    | cell lines                   | 10  | <sup>93</sup>                |
| GEO                 | GSE29682      | breast, central nervous system, colon, leukemia, melanoma, lung, ovary, prostate, kidney (cancer)      | cell lines                   | 178 | <sup>94,95</sup>             |
| GEO                 | GSE29778      | HEK293 (embryonic kidney)                                                                              | cell lines                   | 12  | <sup>96</sup>                |
| GEO                 | GSE30472      | brain (cancer; glioma)                                                                                 | tissues                      | 55  | <sup>97</sup>                |
| GEO                 | GSE30521      | prostate (benign and cancer)                                                                           | tissues                      | 23  | <sup>98</sup>                |
| GEO                 | GSE30727      | stomach (cancer)                                                                                       | tissues                      | 60  | <sup>99</sup>                |
| GEO                 | GSE32875      | LNCaP (prostate cancer)                                                                                | cell lines                   | 8   | <sup>100</sup>               |
| GEO                 | GSE37138      | lung (cancer)                                                                                          | tissues                      | 117 | <sup>101</sup>               |
| GEO                 | GSE40871      | acute myeloid leukemia                                                                                 | primary cells                | 67  | <sup>102</sup>               |
| GEO                 | GSE43107      | brain (cancer; glioma)                                                                                 | tissues                      | 95  | <sup>103,104</sup>           |
| GEO                 | GSE43754      | bone marrow stem and progenitor cells (chronic myeloid leukemia)                                       | cells                        | 20  | <sup>105</sup>               |
| GEO                 | GSE43830      | W138 (fetal lung fibroblasts)                                                                          | cell lines                   | 6   | <sup>106</sup>               |
| GEO                 | GSE45379      | HeLa (cervical cancer)                                                                                 | cell lines                   | 6   | -                            |
| GEO                 | GSE46691      | prostate (cancer)                                                                                      | tissues                      | 545 | <sup>107,108</sup>           |

|     |          |                                                                                  |                    |     |                          |
|-----|----------|----------------------------------------------------------------------------------|--------------------|-----|--------------------------|
| GEO | GSE47032 | kidney (cancer)                                                                  | tissues            | 40  | <sup>109</sup>           |
| GEO | GSE53405 | MCF10A (benign)                                                                  | cell lines         | 26  | -                        |
| GEO | GSE57076 | THP1 (acute monocytic leukemia)                                                  | cell lines         | 7   | <sup>110</sup>           |
| GEO | GSE57933 | bladder (cancer)                                                                 | tissues            | 199 | <sup>111</sup>           |
| GEO | GSE58598 | breast (cancer)                                                                  | tissues            | 10  | -                        |
| GEO | GSE62116 | prostate (cancer)                                                                | tissues            | 235 | <sup>112, 113, 114</sup> |
| GEO | GSE62667 | prostate (cancer)                                                                | tissues            | 182 | <sup>114, 115</sup>      |
| GEO | GSE67312 | bladder (cancer)                                                                 | primary xenografts | 10  | <sup>116</sup>           |
| GEO | GSE68591 | sarcoma (84 cancer) and 5 benign                                                 | cell lines         | 75  | <sup>117</sup>           |
| GEO | GSE71010 | neutrophils (cystic fibrosis and healthy controls)                               | cells              | 93  | <sup>118</sup>           |
| GEO | GSE72291 | prostate (cancer)                                                                | tissues            | 139 | <sup>114</sup>           |
| GEO | GSE78246 | brain (schizophrenia, bipolar disorder, major depressive disorder, and controls) | tissues            | 20  | <sup>119</sup>           |
| GEO | GSE79956 | prostate (cancer)                                                                | tissues            | 211 | -                        |
| GEO | GSE79957 | prostate (cancer)                                                                | tissues            | 260 | -                        |
| GEO | GSE80683 | prostate (cancer)                                                                | tissues            | 17  | -                        |
| GEO | GSE9342  | T-cell acute lymphoblastic leukaemia                                             | cell lines         | 17  | -                        |
| GEO | GSE9385  | brain (26 glioblastomas, 22 oligodendrogliomas and 6 control brain samples)      | tissues            | 55  | <sup>120</sup>           |

**Supplementary Table S11. Primers used in this study.**

| Primer                   | Gene name                                                    | Primer sequence (5'-3')                                 |
|--------------------------|--------------------------------------------------------------|---------------------------------------------------------|
| <i>GHSROS</i>            | growth hormone secretagogue receptor opposite strand         | ACATTCAGCAAATCCAGTTAATGACA                              |
|                          |                                                              | CGACTGGAGCACGAGGACACTTGA                                |
| <i>GHSROS</i> -RT linker |                                                              | CGACTGGAGCACGAGGACACTGACAACAGAATTCACTACTTCCC AAA        |
| <i>AR</i>                | androgen receptor                                            | CTGGACACGACAACAACCAG                                    |
|                          |                                                              | CAGATCAGGGGCGAAGTAGA                                    |
| <i>NTSR1</i>             | neurotensin receptor 1 (high affinity)                       | Proprietary – QIAGEN QuantiTect Primer Assay QT00018494 |
| <i>TFF1</i>              | trefoil factor 1                                             | Proprietary - QIAGEN QuantiTect Primer Assay QT00209608 |
| <i>TFF2</i>              | trefoil factor 2                                             | Proprietary - QIAGEN QuantiTect Primer Assay QT00001785 |
| <i>MUC5B</i>             | mucin 5B, oligomeric mucus/gel-forming                       | Proprietary - QIAGEN QuantiTect Primer Assay QT01322818 |
| <i>PPP2R2C</i>           | protein phosphatase 2, regulatory subunit B, gamma           | Proprietary - QIAGEN QuantiTect Primer Assay QT01006383 |
| <i>RPL32</i>             | ribosomal protein L32 (housekeeping gene)                    | CCCCTTGTAAGCCCAAGA                                      |
|                          |                                                              | GACTGGTGCCGGATGAACTT                                    |
| <i>ACTB</i>              | actin beta (housekeeping gene)                               | ACTCTTCCAGCCTTCCTCCT                                    |
|                          |                                                              | CAGTGATCTCCTTCTGCATCCT                                  |
| <i>GAPDH</i>             | glyceraldehyde-3-phosphate dehydrogenase (housekeeping gene) | AATCCCATCACCATCTTCCA                                    |
|                          |                                                              | AAATGAGCCCCAGCCTTC                                      |
| <i>HPRT</i>              | hypoxanthine phosphoribosyltransferase 1 (housekeeping gene) | CAGTCAACGGGGACATAAA                                     |
|                          |                                                              | AGAGGTCCTTTTACCAGCAA                                    |

**Supplementary Dataset 1. Differentially expressed genes in LNCaP-GHSROS cells. Compared to empty vector control.** Red: higher expression in LNCaP-GHSROS cells; Black: lower expression in LNCaP-GHSROS cells. Fold-changes are  $\log_2$  transformed;  $Q$ -value denotes the false discovery rate (FDR; Benjamini-Hochberg)-adjusted  $P$ -value (cutoff  $\leq 0.05$ ).

(provided in a separate file).

**Supplementary Dataset 2. Enrichment for GO terms in the category ‘biological process’ for genes upregulated in LNCaP-GHSROS cells (compared to empty-vector control).  $P \leq 0.01$ , Fisher's exact test.**

(provided in a separate file).

**Supplementary Dataset 3. Enrichment for GO terms in the category ‘biological process’ for genes downregulated in LNCaP-GHSROS cells (compared to empty-vector control).  $P \leq 0.01$ , Fisher's exact test.**

(provided in a separate file).

## SUPPLEMENTARY METHODS

### Identification of *GHSROS* transcription in exon array datasets

To assess *GHSROS* expression, we interrogated Affymetrix GeneChip Exon 1.0 ST arrays, strand-specific oligonucleotide microarrays with probes for known and predicted exons (hereafter termed exon arrays). Exon arrays are comparable to RNA-seq in experiments aimed at assessing exon expression (*i.e.* gene isoforms) and suitable for experiments where the exon of interest is known<sup>121, 122</sup>. In the Exon 1.0 ST array, known (genes and ESTs) and putative exons are combined to form ‘transcript clusters’, with each exon defined as a probe set (typically, a set of 2-4 probes). By combining all probe sets, the expression of a transcript cluster (known or putative gene) can be measured (see <https://goo.gl/4RSTG3>). To identify probe set(s) corresponding to *GHSROS*, we downloaded the Exon 1.0 ST probe annotation file from NCBI (NCBI Gene Expression Omnibus (GEO) accession no. GPL5188). Full-length *GHSROS* (1.1 kb) was aligned to the human genome (NCBI36/hg18; March 2006 assembly) to generate genomic coordinates compatible with the probe file (chr3:173,646,439-173,647,538). Next, the probe annotation file (GPL5188) was interrogated to reveal probe sets spanning *GHSROS* by entering the following command in a UNIX terminal window:

```
sed 's/#.*//' GPL5188.txt | awk -F " " '{print $2}' $1 | grep $(echo  
"chr3:173646846-173647446" | perl -ne 'print if /\bchr3\.:173646[0-  
9][0-9][0-9]-173647[0-9][0-9][0-9]/' $1) GPL5188.txt
```

This revealed a probe set, 2652604, consisting of 4 probes complementary to *GHSROS*.

Cell and tissue exon array data were downloaded from NCBI GEO<sup>123</sup>, EBI ArrayExpress<sup>124</sup> and the Affymetrix web site (see Supplementary Table S10). GEO datasets were bulk-downloaded using v3.6.2.117442 of the Aspera Connect Linux software (Aspera, Emeryville, CA, USA). In total, 3,924 samples were downloaded, corresponding to ~46% of all exon array data deposited in the NCBI GEO database. Arrays (individual CEL files) were normalized (output on a log<sub>2</sub> scale, centered at 0) using the *SCAN* function in the R package ‘SCAN.UPC’<sup>125, 126</sup>. *SCAN* normalizes each array (sample) individually by removing background noise (probe- and array-specific) data from within the array. Next, arrays were interrogated using the *UPC* function in ‘SCAN.UPC’. *UPC* outputs standardized expression values (*UPC* value), ranging from 0 to 1, which indicate whether a gene is actively transcribed in a sample of interest: higher values indicate that a gene is ‘active’<sup>126</sup>. *UPC* scores are platform-independent and allow cross-experimental and cross-platform integration.

### Evaluation of *GHSR/GHSROS* transcription in deep RNA-seq dataset

It has been estimated that reliable detection of low abundance transcripts in humans warrants very deep sequencing (> 200 million reads per sample<sup>127</sup>) – far beyond most current datasets. To illustrate, we considered the expression of *GHSR/GHSROS* in a comparable clinical dataset. Publicly available RNA-seq data (NCBI GEO accession no. GSE31528) from eight subjects with metastatic castration-resistant prostate cancer (bone marrow metastases)<sup>128</sup> were interrogated. Briefly, total RNA-seq was performed on random-primed paired end read libraries, to ensure consistent transcript coverage<sup>128, 129</sup>, generating an average of 160M reads per sample. Paired-end FASTQ files were aligned to the human genome (UCSC build hg19) using the spliced-read mapper TopHat



(v2.0.9)<sup>130</sup> and reference gene annotations to guide the alignment. BigWig sequencing tracks for the UCSC genome browser<sup>131, 132</sup> were obtained from TopHat-generated BAM files (indexed by samtools v1.2<sup>133</sup>) using a local instance of the *bamCoverage* command in deepTools v2.5.4<sup>134</sup>. BigWig files were visualized in the UCSC genome browser (hg19). A region with less than ~10 supporting reads can be considered to have low coverage, rendering active transcription difficult to interpret<sup>127, 135</sup>.

### **Cell culture, prostate cancer patient derived xenograft (PDX) models, and treatments**

The cancer cell lines PC3 (ATCC CRL-1435), DU145 (ATCC HTB-81), LNCaP (ATCC CRL-1740), ES-2 (ATCC CRL-1978), A549 (ATCC CCL-185), and 22Rv1 (ATCC CRL-2505) were obtained from the American Type Culture Collection (ATCC, Rockville, MD, USA). The C4-2B<sup>66</sup> and DUCaP<sup>67</sup> prostate cancer cell lines, six LuCaP prostate derived xenograft (PDX) lines<sup>17</sup>, and the BM18 PDX cell line<sup>18</sup> were available in our laboratory. All prostate cancer and ovarian cancer cell lines were maintained in Roswell Park Memorial Institute (RPMI) 1640 medium (RPMI-1640; Invitrogen, Carlsbad, CA) with 10 % Fetal Calf Serum (FCS, Thermo Fisher Scientific Australia, Scoresby, VIC, Australia), supplemented with 100 U/mL penicillin G and 100 ng/mL streptomycin (Invitrogen). The A549 lung cancer cell line was maintained in Dulbecco's Modified Eagle Medium: Nutrient Mixture F-12 (DMEM/F12) medium (Invitrogen) with 10% FCS (Thermo Fisher Scientific Australia) supplemented with 100 U/mL penicillin G and 100 ng/mL streptomycin (Invitrogen). The non-tumorigenic RWPE-1 (ATCC CRL-11609) and the transformed, tumorigenic RWPE-2 (ATCC CRL-11610) prostate epithelium-derived cell lines were cultured in keratinocyte serum-free medium (Invitrogen) supplemented with 50 µg/mL bovine pituitary extract and 5 ng/mL epidermal growth factor (Invitrogen). All cell lines were passaged at 2- to 3-day intervals on reaching 70 % confluency using TrypLE Select (Invitrogen). Cell morphology and viability were monitored by microscopic observation and regular Mycoplasma testing was performed (Universal Mycoplasma Detection Kit, ATCC). For drug treatments, cells were treated with 10 µM enzalutamide (ENZ; Selleck Chemicals, Houston, TX, USA) or 10-100 nM docetaxel (DTX; Sigma Aldrich, St. Louis, MO, USA) for 96 (functional assays) or 48 hours (qRT-PCR) and compared to dimethyl sulfoxide (DMSO) (Sigma Aldrich, St. Louis, MO, USA) vehicle control.

### **Production of *GHSROS* overexpressing cancer cell lines**

Full-length *GHSROS* transcript was cloned into the *pTarget* mammalian expression vector (Promega, Madison, WI). PC3, DU145, and A549 cell lines were transfected with *GHSROS-pTarget* DNA, or vector alone (empty vector), (using Lipofectamine LTX, Invitrogen) according to the manufacturer's instructions. Cells were incubated for 24 hours in LTX and selected with geneticin (100-1500 µg/mL G418, Invitrogen). As LNCaP prostate cancer cells were difficult to transfect using lipid-mediated transfection, we employed lentiviral transduction. Briefly, *pReceiver-Lv105* vectors, expressing full length *GHSROS*, or empty control vectors, were obtained from GeneCopoeia (Rockville, MD). For stable overexpression, LNCaP cells were seeded at 50-60% confluency and transduced with *GHSROS*, or empty vector control lentiviral constructs in the presence of 8 µg/ml polybrene (Sigma Aldrich). Following a 48-hour incubation period, transduced cells were selected with 1 µg/mL puromycin (Invitrogen). *GHSROS* expression was

confirmed approximately 3 weeks after selection by qRT-PCR, every 2-3 weeks, and before every functional experiment (see Supplementary Fig. S5).

### **RNA extraction, reverse transcription and quantitative reverse transcription Polymerase Chain Reaction (qRT-PCR)**

Total RNA was extracted from cell pellets using an RNeasy Plus Mini Kit (QIAGEN, Hilden, Germany) with a genomic DNA (gDNA) Eliminator spin column. To remove contaminating genomic DNA, 1 µg RNA was DNase treated prior to cDNA synthesis with Superscript III (Invitrogen). qRT-PCR was performed using the AB7500 FAST sequence detection thermal cycler (Applied Biosystems, Foster City, CA), or the ViiA Real-Time PCR system (Applied Biosystems) with SYBR Green PCR Master Mix (QIAGEN) using primers listed in Supplementary Table S11. A negative control (water instead of template) was used in each real-time plate for each primer set. All real-time experiments were performed in triplicate. Baseline and threshold values ( $C_t$ ) were obtained using ABI 7500 Prism and the relative expression of mRNA was calculated using the comparative  $2^{-\Delta\Delta C_t}$  method<sup>136</sup>. Expression was normalized to the housekeeping gene ribosomal protein L32 (*RPL32*). Statistical analyses were performed using GraphPad Prism v.6.01 software (GraphPad Software, Inc., San Diego, CA). Student's *t*-test or Mann-Whitney-Wilcoxon tests were used to assess the statistical significance of all the direct comparisons.

### ***GHSROS* qRT-PCR interrogation of human tissue specimens**

To survey the expression of *GHSROS* in cancer, we initially interrogated a TissueScan Cancer Survey Tissue qPCR panel (CSRT102; OriGene, Rockville, MD, USA); cDNA arrayed on multi-well PCR plates. Some of the samples are normal non-malignant tissue samples, making it possible to compare expression in tumor versus normal tissue. For each cancer type, data were expressed as mean fold change using the comparative  $2^{-\Delta\Delta C_t}$  method against a non-malignant control tissue. Normalized to  $\beta$ -actin (*ACTB*).

To further investigate the expression of *GHSROS* in prostate cancer TissueScan Prostate Cancer Tissue qPCR panels (HPRT101, HPRT102, and HPRT103) were obtained from OriGene. The cDNA panels contained of a total of 24 normal prostate-derived samples, 31 abnormal prostate samples (defined as lesions), and 88 prostate tumor samples. These panels were examined by qRT-PCR, using the method described above, except that the housekeeping gene ribosomal protein L32 (*RPL32*) was employed.

An independent cohort was obtained from the Andalusian Biobank (Servicio Andaluz de Salud, Spain). It consisted of tissue from 28 patients with clinical high-grade prostate cancer (10 localized and 18 metastatic tumors) and 8 normal prostate tissue samples. RT-PCR was performed using Brilliant III SYBR Green Master Mix and a Stratagene Mx3000p instrument (both from Agilent, La Jolla, CA, USA), as previously described<sup>137</sup>. Briefly, samples were on the same plate were analysed with a standard curve to estimate mRNA copy number (tenfold dilutions of synthetic cDNA template for each transcript). No-RNA controls were carried out for all primer pairs. To control for variations in the amount of RNA used, and the efficiency of the reverse-transcription reaction, the expression level (copy number) of each transcript was adjusted by a normalization factor

(NF) obtained from the expression of three housekeeping genes (*ACTB*, *HPRT*, and *GAPDH*) using the geNorm algorithm<sup>138</sup>. Primers used are listed in Supplementary Table S11.

### **Locked Nucleic Acid-Antisense Oligonucleotides (LNA-ASO)**

Two distinct LNA ASOs, RNV104L and RNV124, complementary to different regions of *GHSROS* (see Supplementary Fig. S6), were designed in-house and synthesized commercially (Exiqon, Vedbæk, Denmark). The ASOs contained two consecutive LNA nucleotides at the 5'-end and three consecutive LNA nucleotides at the 3'-end – in line with gapmer design principles. RNV104L contained LNA nucleotides at positions 2, 3, 16, 17, and 18; RNV124 at positions 3, 4, 18, 19, and 20. The LNA ASO sequences were as follows: scrambled control sequence: 5'-GCTTCGACTCGTAATCACCTA-3'; RNV124 (underlined bases denote LNA nucleotides): 5'-ATAAACCTGCTAGTGTCCCTCC-3'; RNV104L: 5'-GTTAACTTTCTTCTTCCTTG-3'. Lyophilized oligonucleotides were resuspended in ultrapure H<sub>2</sub>O (Invitrogen) and stored as a 100 µM stock solution at -20°C. Briefly, LNA-ASOs were diluted to 20 µM in OptiMEM I Reduced Serum Medium (Invitrogen) and cultured cells were transfected according to the manufacturer's instructions. Cultured cells were incubated at 37°C in 5% CO<sub>2</sub> for 4 hours, before 500 µl growth medium, containing 30% FCS, was added to the serum-free medium. The cells were transfected for 24-72 hours and *GHSROS* levels assessed by qRT-PCR.

### **RNA secondary structure prediction**

The ViennaRNA web server was employed<sup>139</sup> to predict the secondary structure of *GHSROS* and its minimum free energy<sup>140, 141</sup>.

### **Cell proliferation assays**

Proliferation assays were performed using an xCELLigence real-time cell analyzer (RTCA) DP instrument (ACEA Biosciences, San Diego, CA). This system employs sensor impedance technology to quantify the status of the cell using a unit-less parameter termed the cell index (CI). The CI represents the status of the cell based on the measured relative changes in electrical impedance that occur in the presence and absence of cells in the wells (generated by the software, according to the formula  $CI = (Z_i - Z_0)/15 \Omega$ , where  $Z_i$  is the impedance at an individual point of time during the experiment and  $Z_0$  the impedance at the start of the experiment). Impedance is measured at three different frequencies (10, 25 or 50 kHz). Briefly,  $5 \times 10^3$  cells were trypsinized and seeded into a 96 well plate (E-plate) and grown for 48 hours in 150 µl growth media. Cell index was measured every 15 minutes and all experiments were performed in triplicate, with at least three independent repeats. Because cells did not attach well to the gold microelectrodes of the xCELLigence instrument, LNCaP proliferation was quantified by measuring the cleavage of WST-1 (Roche, Basel, Switzerland). Briefly,  $5 \times 10^4$  cells/well were seeded in 96-well plates (BD Biosciences, Franklin Lakes, NJ) and propagated for 72 hours in complete medium. To determine cell number, absorbance was measured using the FLUOstar Omega spectrophotometer (BMG, Ortenberg, Germany) at 440 nm using a reference wavelength of 600 nm. All proliferation experiments were performed independently three times, with 8 replicates each.

### **Cell Viability Assay**

LNCaP and PC3 vector or *GHSROS* over-expressing cells (5000 cells/well) were seeded in 96-well plates (BD Biosciences) and propagated overnight in complete medium. LNCaP cells were treated with standard doses of test compounds in both charcoal stripped FCS (CSS) or 2% FCS. PC3 cells were treated with increasing doses of docetaxel in 2% FCS. After a 96-hour period cell viability was measured using a WST-1 cell proliferation assay (Roche, Nonnenwald, Penzberg, Germany) according to the manufacturer's instructions. All viability experiments were performed independently three times, with 4 replicates each.

### **Cell Migration assays**

Migration assays were performed using an xCELLigence RTCA DP instrument (ACEA Biosciences). Briefly,  $5 \times 10^4$  cells/well were seeded on the top chamber in 150  $\mu$ l serum-free media. The lower chamber contained 160  $\mu$ l media with 10% FCS as a chemoattractant. Cell index was measured every 15 minutes for 24 hours to indicate the rate of cell migration to the lower chamber. All experiments were performed in triplicate with at least 3 independent repeats. Because cells did not attach well to the gold microelectrodes of the xCELLigence instrument, LNCaPs migration was assessed using a transwell assay. Briefly,  $6 \times 10^5$  cells were suspended in serum-free medium and added to the upper chamber of inserts coated with a polycarbonate membrane (8  $\mu$ m pore size; BD Biosciences). Cells in 12-well plates were allowed to migrate for 24 h in response to a chemoattractant (10% FBS) in the lower chamber. After 24 h, cells remaining in the upper chamber were removed. Cells that had migrated to the lower surface of the membrane were fixed with methanol (100%) and stained with 1% crystal violet. Acetic acid (10%, v/v) was used to extract the crystal violet and absorbance was measured at 595 nm. Each experiment consisted of three replicates and was repeated independently three times.

### **Mouse subcutaneous *in vivo* xenograft models**

All mouse studies were carried out with approval from the University of Queensland and the Queensland University of Technology Animal Ethics Committees. PC3-GHSROS, PC3-vector, DU145-GHSROS, DU145-vector, LNCaP-GHSROS, and LNCaP-vector cell lines were injected subcutaneously into the flank of 4-5-week-old male NSG mice<sup>142</sup> (obtained from Animal Resource Centre, Murdoch, WA, Australia). Cells were injected in a 1:1 ratio with growth factor-reduced Matrigel (Thermo Fisher) ( $n=8-10$  per cell line) and tumors measured twice weekly with digital calipers (ProSciTech, Kirwan, QLD, Australia). Neither randomization nor blinding for animal use was performed because we commercially obtained these mice with the same genetic background. Animals were euthanized once tumor volume reached 1,000 mm<sup>3</sup>, or at other ethical endpoints. At the experimental endpoint, the primary tumor was resected, divided in half, snap frozen and stored at -80°C.

### **Histology and immunohistochemistry**

For histological analysis, cryosections (6-10  $\mu$ m thick) were prepared using a Leica CM1850 cryotome (Wetzlar, Germany). Sections were collected onto warm, charged Menzel Superfrost slides (Thermo Fisher), fixed in ice-cold 100% acetone, air dried and

stored at -80 °C. For immunohistochemistry, tissues were fixed in paraformaldehyde and dehydrated through a graded series of ethanol and xylene, before being embedded in paraffin. Sections (5µm) were mounted on to glass Menzel Superfrost slides (ThermoFisher Scientific). Immunohistochemistry was performed using antibodies for the proliferation marker Ki67 (rabbit anti-human Ki67, Abcam, Cambridge, UK) and for the infiltration of murine blood vessels using rabbit anti-murine CD31 antibody (Abcam). Tissue sections were incubated with HRP-polymer conjugates (SuperPicture, Thermo Fisher Scientific), and incubated with the chromagen diaminobenzidine (DAB) (Dako, Glostrup, Denmark), as per manufacturer's specifications. Slides were counterstained with Mayer's hematoxylin, dehydrated, and mounted with coverslips using D.P.X neutral mounting medium (Sigma-Aldrich). All sections were counterstained with Mayer's hematoxylin (Sigma Aldrich) and mounted with coverslips using D.P.X with Colourfast (Fronine, ThermoFisher Scientific).

### **RNA sequencing of PC3-GHSROS cells**

RNA was extracted from *in vitro* cultured PC3-GHSROS cells and controls, as outlined in the manuscript body. RNA purity was analysed using an Agilent 2100 Bioanalyzer, and RNA with an RNA Integrity Number (RIN) above 7 used for RNA-seq. Strand-specific RNA-sequencing (RNA-seq) was performed by Macrogen, South Korea. A TruSeq stranded mRNA library (Illumina) was constructed and RNA sequencing performed (50 million reads) on a HiSeq 2000 instrument (Illumina) with 100bp paired end reads. Pre-processing of raw FASTQ reads, including elimination of contamination adapters, was performed with scythe v0.994 (<https://github.com/vsbuffalo/scythe>). Paired-end human FASTQ files were aligned to the human genome, UCSC build hg19 using the spliced-read mapper TopHat (v2.0.9)<sup>130</sup> and reference gene annotations to guide the alignment.

Raw gene counts were computed from TopHat-generated BAM files using featureCounts v1.4.5-p1<sup>143</sup>, counting coding sequence (CDS) features of the UCSC hg19 gene annotation file (gtf). FeatureCounts output files were analysed using the R programming language (v.3.2.2). Briefly, raw counts were normalized by Trimmed Mean of M-values (TMM) correction<sup>144, 145</sup>. Library size-normalized read counts (per million; CPM) were subjected to the voom function (variance modelling at the observation-level) in limma v3.22.1 (Linear Models for Microarray Data)<sup>146, 147</sup>, with trend=TRUE for the eBayes function and correction for multiple testing (Benjamini-Hochberg false discovery rate of cut-off, *Q*-value, set at 0.05). Genes with at least a 1.5 log<sub>2</sub> fold-change difference in expression between PC3-GHSROS and PC3-vector (empty vector) cells were defined as differentially expressed. Although validation is not required, as RNA-seq gives very accurate measurements of relative expression across a broad dynamic range<sup>148</sup>, selected differentially regulated genes were validated using quantitative reverse-transcription PCR (qRT-PCR) (see manuscript body and table S11).

Detailed gene annotations were obtained by querying Ensembl with the R/Bioconductor package 'biomaRt'<sup>149</sup>. Gene Ontology (GO) term analyses were performed using DAVID (Database for Annotation, Visualization and Integrated Discovery)<sup>150</sup>. Briefly, to test for enrichment we interrogated DAVID's GO FAT database with genes differentially

expressed in PC3-GHSROS cells. The DAVID functional annotation tool categorizes GO terms and calculates an ‘enrichment score’ or EASE score (a modified Fisher's exact test-derived  $P$ -value). Categories with smaller  $P$ -values ( $P \leq 0.01$ ) and larger fold-enrichments ( $\geq 2.0$ ) were considered interesting and most likely to convey biological meaning<sup>150</sup>.

To perform OncoPrint meta-analysis, genes differentially expressed in PC3-GHSROS were separated into ‘over-expressed’ and ‘under-expressed’ gene sets. The OncoPrint database<sup>27</sup> was interrogated by importing these genes, and enriched concepts were generated and ordered by  $P$ -values (calculated using Fisher's exact test). Only datasets with an odds ratio  $\geq 3.0$  and a  $P$ -value  $\leq 0.01$  were retained. The datasets were exported as nodes and edges for network visualization in Cytoscape<sup>151</sup> (v3.4.0). The network layout and node position were generated using the Force-Directed Layout algorithm<sup>152</sup>, with odds ratio as the leading parameter for the edge weight. Using our custom concept generated lists, we next sought to assess the differential expression of our gene lists in two prostate cancer microarray datasets: Grasso<sup>35</sup> (59 localized and 35 metastatic prostate tumors) and Taylor<sup>36</sup> (123 localized and 27 metastatic prostate tumors). Differentially expressed genes were ranked and results exported as fold change ( $\log_2$  transformed, median centered). Data was filtered for significance with  $P$ -value set at  $\leq 0.05$  and Benjamini-Hochberg false discovery rate (FDR)  $Q$ -value<sup>153</sup> at  $\leq 0.25$ ; a threshold deemed suitable to find biologically relevant transcriptional signatures<sup>154, 155</sup>.

### **RNA sequencing of LNCaP-GHSROS cells**

RNA was extracted from LNCaP-GHSROS xenograft tumors and controls (empty vector control lentiviral constructs), as outlined in the manuscript body. RNA purity was analysed using an Agilent 2100 Bioanalyzer, and RNA with an RNA Integrity Number (RIN) above 7 used for RNA-seq. Strand-specific RNA-seq was performed by the South Australian Health and Medical Research Institute (SAHMRI, Adelaide, SA, Australia). A TruSeq stranded mRNA library (Illumina) was constructed and RNA sequencing performed (35 million reads) on a Nextseq 500 instrument (Illumina) with 75bp single end reads. Pre-processing of raw FASTQ reads, including elimination of contamination adapters, was performed with scythe v0.994 (<https://github.com/vsbuffalo/scythe>). Human (xenograft tumor; the graft) and mouse (the host) RNA-seq reads were separated using Xenome<sup>156</sup> on the trimmed FASTQ files, leaving ~20M human reads. Reads were aligned to the human genome and processed as described for PC3-GHSROS cells above. Genes differentially expressed in LNCaP-GHSROS cells (cutoff set at  $\log_2$  1.5-fold-change and  $Q \leq 0.05$ ) were imported into the GSEA (Gene Set Enrichment Analysis) program<sup>157</sup>.

### **LP50 prostate cancer cell line AR knockdown microarray**

Publicly available Affymetrix HG-U133 Plus 2.0 microarray data (NCBI GEO accession no. GSE22483) from a substrain of the LNCaP cell line: androgen-independent late passage LNCaP cells (LP50) was interrogated. This cell line was subjected to androgen receptor (AR) knockdown by shRNA<sup>64</sup>. The array ( $n=2$ , of AR shRNA and scrambled control) was normalized to housekeeping genes using the Affymetrix Gene Chip Operating System v1.4<sup>64</sup>. Prior to differential expression analysis, the probe set was pre-

filtered, using the R statistical programming language, as follows: probes with mean expression values in the lowest 20<sup>th</sup> percentile of the array was removed. Differential expression was determined by the R package ‘limma’<sup>139</sup> and probes with a Benjamini-Hochberg adjusted  $P$ -value ( $Q$ ; BH-FDR)  $\leq 0.05$  considered significant. Gene annotations were obtained using the R/Bioconductor packages ‘Biobase’<sup>158</sup> and ‘GEOquery’<sup>159</sup>.

### Survival analysis

Two datasets were interrogated: Taylor<sup>36</sup> (123 localized and 27 metastatic prostate tumors) and TCGA-PRAD from The Cancer Genomics Atlas (TCGA) consortium, which contains tumors from patients with moderate- (~39% Gleason 6 and 3 + 4) and high- (~61% Gleason 4+3 and Gleason 8-10) risk localized prostate carcinoma<sup>37</sup>. Briefly, in the case of TCGA-PRAD, the UCSC Xena Browser<sup>160</sup> was used to obtain normalized gene expression values, represented as  $\log_2(\text{normalized counts}+1)$ , from the ‘TCGA TARGET GTeX’ dataset consisting of ~12,000 tissue samples from 31 cancers<sup>161</sup>. To obtain up-to-date overall survival (OS) and disease-free survival (DFS) information, we manually queried cBioPortal for Cancer Genomics<sup>162, 163</sup> (last accessed 05.08.16).

We performed non-hierarchical  $k$ -means clustering<sup>164</sup> to partition patients into groups with similar gene expression patterns<sup>165</sup>. The following 10 genes obtained by Oncomine meta-analysis (see above) were assessed: *AASS*, *CHRDLI*, *CNTN1*, *DIRAS1*, *FBXL16*, *IFI16*, *MUMIL1*, *TP53I11*, *TFF2*, and *ZNF467*. Clustering was performed using the *kmeans* function in the R package ‘stats’ with two clusters/groups ( $k=2$ ) and the best cluster pair after 500 runs (*nstart=500*) was retained<sup>166</sup>. Kaplan-Meier survival analysis<sup>167</sup> was performed with the R package ‘survival’<sup>168</sup>, fitting survival curves (*survfit*) and computing log-rank  $P$ -values using the *survdif* function, with  $\rho=0$  (equivalent to the method employed by UCSC Xena; see <https://goo.gl/4knf62>). Survival curves were plotted when survival was significantly different between two groups (log-rank  $P \leq 0.05$ ). We used the *coxph* function in the R package ‘survival’ to test the prognostic significance of genes (that is: we implemented the Cox proportional hazard model to analyze the association of gene expression with patient survival)<sup>169, 170</sup>, with  $P \leq 0.05$  (Wald test) considered significant. Because there is a single categorical covariate ( $k$ -means cluster; group), the  $P$ -values from the log-rank and the Cox regression tests are comparable. We considered groups (clusters) that had fewer than 10 samples with a recorded event unreliable.

A scaled heat map (unsupervised hierarchical clustering by Euclidean distance) was generated in R using *heatmap.3* (available at <https://goo.gl/Yd9aTY>) and a custom R script.

### Statistical analyses

Data values were expressed as mean  $\pm$  s.e.m. of at least two independent experiments and evaluated using Student’s  $t$ -test for unpaired samples, or otherwise specified. Mean differences were considered significant when  $P \leq 0.05$ .  $Q$ -values denote multiple testing correction (Benjamini-Hochberg) adjusted  $P$ -values<sup>153</sup>. Normalized high-throughput gene expression data were analyzed using LIMMA, employing a modified version of the

Student's *t*-test (moderated *t*-test) where the standard errors are reduced toward a common value using an empirical Bayesian model robust for datasets with few biological replicates<sup>147</sup>. Statistical analyses were performed using GraphPad Prism v.6.01 software (GraphPad Software, Inc., San Diego, CA), or the R statistical programming language.

### **Code**

Selected R code is available in a repository at [https://github.com/sciseim/GHSROS\\_MS](https://github.com/sciseim/GHSROS_MS). Additional R and bash scripts can be obtained by contacting the corresponding authors.



## SUPPLEMENTARY REFERENCES

- 68 Langer W. *et al.* Exon array analysis using re-defined probe sets results in reliable identification of alternatively spliced genes in non-small cell lung cancer. *BMC Genomics* 2010; **11**: 676.
- 69 Folkard D.L. *et al.* Suppression of LPS-induced transcription and cytokine secretion by the dietary isothiocyanate sulforaphane. *Mol Nutr Food Res* 2014; **58**: 2286-2296.
- 70 Stricker S.H. *et al.* Widespread resetting of DNA methylation in glioblastoma-initiating cells suppresses malignant cellular behavior in a lineage-dependent manner. *Genes Dev* 2013; **27**: 654-669.
- 71 Riihijarvi S. *et al.* Prognostic influence of macrophages in patients with diffuse large B-cell lymphoma: a correlative study from a Nordic phase II trial. *Haematologica* 2015; **100**: 238-245.
- 72 Soreq L. *et al.* Identifying alternative hyper-splicing signatures in MG-thymoma by exon arrays. *PLoS One* 2008; **3**: e2392.
- 73 Riaz M. *et al.* Low-risk susceptibility alleles in 40 human breast cancer cell lines. *BMC Cancer* 2009; **9**: 236.
- 74 Bernstein B.E. *et al.* The NIH Roadmap Epigenomics Mapping Consortium. *Nat Biotechnol* 2010; **28**: 1045-1048.
- 75 Maurano M.T. *et al.* Systematic localization of common disease-associated variation in regulatory DNA. *Science* 2012; **337**: 1190-1195.
- 76 Neph S. *et al.* An expansive human regulatory lexicon encoded in transcription factor footprints. *Nature* 2012; **489**: 83-90.
- 77 Polak P. *et al.* Cell-of-origin chromatin organization shapes the mutational landscape of cancer. *Nature* 2015; **518**: 360-364.
- 78 Polak P. *et al.* Reduced local mutation density in regulatory DNA of cancer genomes is linked to DNA repair. *Nat Biotechnol* 2014; **32**: 71-75.
- 79 Schultz M.D. *et al.* Human body epigenome maps reveal noncanonical DNA methylation variation. *Nature* 2015; **523**: 212-216.
- 80 Hansen R.S. *et al.* Sequencing newly replicated DNA reveals widespread plasticity in human replication timing. *Proc Natl Acad Sci U S A* 2010; **107**: 139-144.
- 81 Thurman R.E. *et al.* The accessible chromatin landscape of the human genome. *Nature* 2012; **489**: 75-82.

- 82 Younis I. *et al.* Rapid-response splicing reporter screens identify differential regulators of constitutive and alternative splicing. *Mol Cell Biol* 2010; **30**: 1718-1728.
- 83 Dutertre M. *et al.* Estrogen regulation and physiopathologic significance of alternative promoters in breast cancer. *Cancer Res* 2010; **70**: 3760-3770.
- 84 Kitamura H. *et al.* Ubiquitin-specific protease 2-69 in macrophages potentially modulates metainflammation. *FASEB J* 2013; **27**: 4940-4953.
- 85 Omura N. *et al.* Cyclooxygenase-deficient pancreatic cancer cells use exogenous sources of prostaglandins. *Mol Cancer Res* 2010; **8**: 821-832.
- 86 Vincent A. *et al.* Genome-wide analysis of promoter methylation associated with gene expression profile in pancreatic adenocarcinoma. *Clin Cancer Res* 2011; **17**: 4341-4354.
- 87 Risueno A. *et al.* A robust estimation of exon expression to identify alternative spliced genes applied to human tissues and cancer samples. *BMC Genomics* 2014; **15**: 879.
- 88 Dutertre M. *et al.* A recently evolved class of alternative 3'-terminal exons involved in cell cycle regulation by topoisomerase inhibitors. *Nat Commun* 2014; **5**: 3395.
- 89 Dutertre M. *et al.* Cotranscriptional exon skipping in the genotoxic stress response. *Nat Struct Mol Biol* 2010; **17**: 1358-1366.
- 90 Calverley D.C. *et al.* Significant downregulation of platelet gene expression in metastatic lung cancer. *Clin Transl Sci* 2010; **3**: 227-232.
- 91 Llorian M. *et al.* Position-dependent alternative splicing activity revealed by global profiling of alternative splicing events regulated by PTB. *Nat Struct Mol Biol* 2010; **17**: 1114-1123.
- 92 Kan Z. *et al.* Diverse somatic mutation patterns and pathway alterations in human cancers. *Nature* 2010; **466**: 869-873.
- 93 Pencovich N., Jaschek R., Tanay A., Groner Y. Dynamic combinatorial interactions of RUNX1 and cooperating partners regulates megakaryocytic differentiation in cell line models. *Blood* 2011; **117**: e1-e14.
- 94 Kohn K.W., Zeeberg B.M., Reinhold W.C., Pommier Y. Gene expression correlations in human cancer cell lines define molecular interaction networks for epithelial phenotype. *PLoS One* 2014; **9**: e99269.
- 95 Reinhold W.C. *et al.* Exon array analyses across the NCI-60 reveal potential regulation of TOP1 by transcription pausing at guanosine quartets in the first intron. *Cancer Res* 2010; **70**: 2191-2203.

- 96 Mukherjee N. *et al.* Integrative regulatory mapping indicates that the RNA-binding protein HuR couples pre-mRNA processing and mRNA stability. *Mol Cell* 2011; **43**: 327-339.
- 97 Gravendeel L.A. *et al.* Gene expression profiles of gliomas in formalin-fixed paraffin-embedded material. *Br J Cancer* 2012; **106**: 538-545.
- 98 Agell L. *et al.* A 12-gene expression signature is associated with aggressive histological in prostate cancer: SEC14L1 and TCEB1 genes are potential markers of progression. *Am J Pathol* 2012; **181**: 1585-1594.
- 99 Hong S.H. *et al.* Upregulation of adenylate cyclase 3 (ADCY3) increases the tumorigenic potential of cells by activating the CREB pathway. *Oncotarget* 2013; **4**: 1791-1803.
- 100 Rajan P. *et al.* Identification of novel androgen-regulated pathways and mRNA isoforms through genome-wide exon-specific profiling of the LNCaP transcriptome. *PLoS One* 2011; **6**: e29088.
- 101 Baty F. *et al.* EGFR exon-level biomarkers of the response to bevacizumab/erlotinib in non-small cell lung cancer. *PLoS One* 2013; **8**: e72966.
- 102 Klco J.M. *et al.* Genomic impact of transient low-dose decitabine treatment on primary AML cells. *Blood* 2013; **121**: 1633-1643.
- 103 Erdem-Eraslan L. *et al.* Intrinsic molecular subtypes of glioma are prognostic and predict benefit from adjuvant procarbazine, lomustine, and vincristine chemotherapy in combination with other prognostic factors in anaplastic oligodendroglial brain tumors: a report from EORTC study 26951. *J Clin Oncol* 2013; **31**: 328-336.
- 104 Mack S.C. *et al.* Epigenomic alterations define lethal CIMP-positive ependymomas of infancy. *Nature* 2014; **506**: 445-450.
- 105 Gerber J.M. *et al.* Genome-wide comparison of the transcriptomes of highly enriched normal and chronic myeloid leukemia stem and progenitor cell populations. *Oncotarget* 2013; **4**: 715-728.
- 106 Tripathi V. *et al.* Long noncoding RNA MALAT1 controls cell cycle progression by regulating the expression of oncogenic transcription factor B-MYB. *PLoS Genet* 2013; **9**: e1003368.
- 107 Erho N. *et al.* Discovery and validation of a prostate cancer genomic classifier that predicts early metastasis following radical prostatectomy. *PLoS One* 2013; **8**: e66855.
- 108 Zhao S.G. *et al.* The Landscape of Prognostic Outlier Genes in High-Risk Prostate Cancer. *Clin Cancer Res* 2016; **22**: 1777-1786.

- 109 Valletti A. *et al.* Genome-wide analysis of differentially expressed genes and splicing isoforms in clear cell renal cell carcinoma. *PLoS One* 2013; **8**: e78452.
- 110 Silva-Martinez G.A. *et al.* Arachidonic and oleic acid exert distinct effects on the DNA methylome. *Epigenetics* 2016; **11**: 321-334.
- 111 Mitra A.P. *et al.* Discovery and validation of novel expression signature for postcystectomy recurrence in high-risk bladder cancer. *J Natl Cancer Inst* 2014; **106**.
- 112 Karnes R.J. *et al.* Validation of a genomic classifier that predicts metastasis following radical prostatectomy in an at risk patient population. *J Urol* 2013; **190**: 2047-2053.
- 113 Tsai H. *et al.* Cyclin D1 Loss distinguishes prostatic small-cell carcinoma from most prostatic adenocarcinomas. *Clin Cancer Res* 2015; **21**: 5619-5629.
- 114 Zhao S.G. *et al.* The Landscape of Prognostic Outlier Genes in High-Risk Prostate Cancer. *Clin Cancer Res* 2016; **22**: 1777-1786.
- 115 Klein E.A. *et al.* A genomic classifier improves prediction of metastatic disease within 5 years after surgery in node-negative high-risk prostate cancer patients managed by radical prostatectomy without adjuvant therapy. *Eur Urol* 2015; **67**: 778-786.
- 116 Jager W. *et al.* Patient-derived bladder cancer xenografts in the preclinical development of novel targeted therapies. *Oncotarget* 2015; **6**: 21522-21532.
- 117 Teicher B.A. *et al.* Sarcoma cell line screen of oncology drugs and investigational agents identifies patterns associated with gene and microRNA expression. *Mol Cancer Ther* 2015; **14**: 2452-2462.
- 118 Hu Z., Jiang K., Frank M.B., Chen Y., Jarvis J.N. Complexity and specificity of the neutrophil transcriptomes in juvenile idiopathic arthritis. *Sci Rep* 2016; **6**: 27453.
- 119 Morgan L.Z. *et al.* Quantitative trait locus and brain expression of HLA-DPA1 offers evidence of shared immune alterations in psychiatric disorders. *Microarrays (Basel)* 2016; **5**: 6.
- 120 French P.J. *et al.* Identification of differentially regulated splice variants and novel exons in glial brain tumors using exon expression arrays. *Cancer Res* 2007; **67**: 5635-5642.
- 121 Dapas M., Kandpal M., Bi Y., Davuluri R.V. Comparative evaluation of isoform-level gene expression estimation algorithms for RNA-seq and exon-array platforms. *Brief Bioinform* 2017; **18**: 260-269.
- 122 Griffith M. *et al.* Alternative expression analysis by RNA sequencing. *Nat Methods* 2010; **7**: 843-847.

- 123 Barrett T. *et al.* NCBI GEO: archive for functional genomics datasets--update. *Nucleic Acids Res* 2013; **41**: D991-995.
- 124 Brazma A. *et al.* ArrayExpress--a public repository for microarray gene expression data at the EBI. *Nucleic Acids Res* 2003; **31**: 68-71.
- 125 Piccolo S.R. *et al.* A single-sample microarray normalization method to facilitate personalized-medicine workflows. *Genomics* 2012; **100**: 337-344.
- 126 Piccolo S.R., Withers M.R., Francis O.E., Bild A.H., Johnson W.E. Multiplatform single-sample estimates of transcriptional activation. *Proc Natl Acad Sci U S A* 2013; **110**: 17778-17783.
- 127 Tarazona S., Garcia-Alcalde F., Dopazo J., Ferrer A., Conesa A. Differential expression in RNA-seq: a matter of depth. *Genome Res* 2011; **21**: 2213-2223.
- 128 Sowalsky AG. *et al.* Whole transcriptome sequencing reveals extensive unspliced mRNA in metastatic castration-resistant prostate cancer. *Mol Cancer Res* 2015; **13**: 98-106.
- 129 Adiconis X. *et al.* Comparative analysis of RNA sequencing methods for degraded or low-input samples. *Nat Methods* 2013; **10**: 623-629.
- 130 Kim D. *et al.* TopHat2: accurate alignment of transcriptomes in the presence of insertions, deletions and gene fusions. *Genome Biol* 2013; **14**: R36.
- 131 Kent W.J. *et al.* The human genome browser at UCSC. *Genome Res* 2002; **12**: 996-1006.
- 132 Karolchik D. *et al.* The UCSC Table Browser data retrieval tool. *Nucleic Acids Res* 2004; **32**: D493-496.
- 133 Li H. *et al.* The Sequence Alignment/Map format and SAMtools. *Bioinformatics* 2009; **25**: 2078-2079.
- 134 Ramirez F. *et al.* deepTools2: a next generation web server for deep-sequencing data analysis. *Nucleic Acids Res* 2016; **44**: W160-W165.
- 135 Sims D., Sudbery I., Ilott N.E., Heger A., Ponting C.P. Sequencing depth and coverage: key considerations in genomic analyses. *Nat Rev Genet* 2014; **15**: 121-132.
- 136 Livak K.J., Schmittgen T.D. Analysis of relative gene expression data using real-time quantitative PCR and the 2(-Delta Delta C(T)) Method. *Methods* 2001; **25**: 402-408.
- 137 Hormaechea-Agulla D. *et al.* Ghrelin O-acyltransferase (GOAT) enzyme is overexpressed in prostate cancer, and its levels are associated with patient's metabolic status: Potential value as a non-invasive biomarker. *Cancer Lett* 2016; **383**: 125-134.

- 138 Vandesompele J. *et al.* Accurate normalization of real-time quantitative RT-PCR data by geometric averaging of multiple internal control genes. *Genome Biol* 2002; **3**: research0034.1-research0034.11.
- 139 Gruber A.R., Bernhart S.H., Lorenz R. The ViennaRNA web services. *Methods Mol Biol* 2015; **1269**: 307-326.
- 140 Wan Y., Kertesz M., Spitale R.C., Segal E., Chang H.Y. Understanding the transcriptome through RNA structure. *Nat Rev Genet* 2011; **12**: 641-655.
- 141 Zuker M., Stiegler P. Optimal computer folding of large RNA sequences using thermodynamics and auxiliary information. *Nucleic Acids Res* 1981; **9**: 133-148.
- 142 Shultz L.D. *et al.* Human lymphoid and myeloid cell development in NOD/LtSz-scid IL2R gamma null mice engrafted with mobilized human hemopoietic stem cells. *J Immunol* 2005; **174**: 6477-6489.
- 143 Liao Y., Smyth G.K., Shi W. featureCounts: an efficient general purpose program for assigning sequence reads to genomic features. *Bioinformatics* 2014; **30**: 923-930.
- 144 Robinson M.D., McCarthy D.J., Smyth G.K. edgeR: a Bioconductor package for differential expression analysis of digital gene expression data. *Bioinformatics* 2010; **26**: 139-140.
- 145 Robinson M.D., Oshlack A. A scaling normalization method for differential expression analysis of RNA-seq data. *Genome Biol* 2010; **11**: R25.
- 146 Law C.W., Chen Y., Shi W., Smyth G.K. voom: Precision weights unlock linear model analysis tools for RNA-seq read counts. *Genome Biol* 2014; **15**: R29.
- 147 Ritchie M.E. *et al.* limma powers differential expression analyses for RNA-sequencing and microarray studies. *Nucleic Acids Res* 2015; **43**: e47.
- 148 Wang E.T. *et al.* Alternative isoform regulation in human tissue transcriptomes. *Nature* 2008; **456**: 470-476.
- 149 Durinck S., Spellman P.T., Birney E., Huber W. Mapping identifiers for the integration of genomic datasets with the R/Bioconductor package biomaRt. *Nat Protoc* 2009; **4**: 1184-1191.
- 150 Huang da W., Sherman B.T., Lempicki R.A. Systematic and integrative analysis of large gene lists using DAVID bioinformatics resources. *Nat Protoc* 2009; **4**: 44-57.
- 151 Shannon P. *et al.* Cytoscape: a software environment for integrated models of biomolecular interaction networks. *Genome Res* 2003; **13**: 2498-2504.
- 152 Suderman M., Hallett M. Tools for visually exploring biological networks. *Bioinformatics* 2007; **23**: 2651-2659.

- 153 Benjamini Y., Hochberg Y. Controlling the false discovery rate: a practical and powerful approach to multiple testing. *J R Stat Soc Series B Stat Methodol* 1995; **1**: 289-300.
- 154 Luck S., Thurley K., Thaben P.F., Westermark P.O. Rhythmic degradation explains and unifies circadian transcriptome and proteome data. *Cell Rep* 2014; **9**: 741-751.
- 155 Simola D.F. *et al.* A chromatin link to caste identity in the carpenter ant *Camponotus floridanus*. *Genome Res* 2013; **23**: 486-496.
- 156 Conway T. *et al.* Xenome--a tool for classifying reads from xenograft samples. *Bioinformatics* 2012; **28**: i172-178.
- 157 Subramanian A. *et al.* Gene set enrichment analysis: a knowledge-based approach for interpreting genome-wide expression profiles. *Proc Natl Acad Sci U S A* 2005; **102**: 15545-15550.
- 158 Huber W. *et al.* Orchestrating high-throughput genomic analysis with Bioconductor. *Nat Methods* 2015; **12**: 115-121.
- 159 Davis S., Meltzer P.S. GEOquery: a bridge between the Gene Expression Omnibus (GEO) and BioConductor. *Bioinformatics* 2007; **23**: 1846-1847.
- 160 Goldman M. *et al.* The UCSC Cancer Genomics Browser: update 2015. *Nucleic Acids Res* 2015; **43**: D812-817.
- 161 Vivian J. *et al.* Toil enables reproducible, open source, big biomedical data analyses. *Nat Biotechnol* 2017; **35**: 314-316.
- 162 Cerami E. *et al.* The cBio cancer genomics portal: an open platform for exploring multidimensional cancer genomics data. *Cancer Discov* 2012; **2**: 401-404.
- 163 Gao J. *et al.* Integrative analysis of complex cancer genomics and clinical profiles using the cBioPortal. *Sci Signal* 2013; **6**: p11.
- 164 Hartigan J.A., Wong M.A. Algorithm AS 136: A k-means clustering algorithm. *J R Stat Soc Ser C Appl Stat* 1979; **28**: 100-108.
- 165 Quackenbush J. Computational analysis of microarray data. *Nat Rev Genet* 2001; **2**: 418-427.
- 166 Weichselbaum R.R. *et al.* An interferon-related gene signature for DNA damage resistance is a predictive marker for chemotherapy and radiation for breast cancer. *Proc Natl Acad Sci U S A* 2008; **105**: 18490-18495.
- 167 Rich J.T. *et al.* A practical guide to understanding Kaplan-Meier curves. *Otolaryngol Head Neck Surg* 2010; **143**: 331-336.
- 168 Therneau T. *A package for survival analysis in S*, doi: 10.1093/survival/43.3.1 (2015).

- 169 Cox D.R. Regression models and life-tables. *Breakthroughs in Statistics*. 527-541 (Springer, 1992).
- 170 Efron B. The efficiency of Cox's likelihood function for censored data. *J Am Stat Assoc* 1977; **72**: 557-565.
