# Supplementary material for: The long non-coding RNA GHSROS reprograms prostate cancer cell lines toward a more aggressive phenotype
Source: bioRxiv preprint, doi:10.1101/682203, version 1 (2019-06-26)
Supplement: Supplementary Dataset 1 [file 682203_file02.xlsx]

## Sheet: dataset 1
Gene Symbol	Gene Name	log2 Fold Change	P-value	Q-value
KLK3	kallikrein related peptidase 3	9.5525	5.2719e-08	3.56105e-06
TMEFF2	transmembrane protein with EGF like and two follistatin like domains 2	9.11364	4.94264e-09	1.42147e-06
HOXB13	homeobox B13	9.05881	2.43686e-09	1.1866e-06
RPS4Y1	ribosomal protein S4, Y-linked 1	8.79503	2.27233e-09	1.1866e-06
SPON2	spondin 2	8.54491	1.0524e-09	1.06996e-06
KLK2	kallikrein related peptidase 2	8.4954	1.17107e-08	1.95159e-06
FXYD3	FXYD domain containing ion transport regulator 3	8.48789	1.20061e-09	1.06996e-06
EEF1A2	eukaryotic translation elongation factor 1 alpha 2	8.40415	2.49732e-09	1.1866e-06
PHGDH	phosphoglycerate dehydrogenase	8.39475	2.46339e-09	1.1866e-06
TMPRSS2	transmembrane protease, serine 2	8.38979	8.18577e-08	4.53436e-06
GDF15	growth differentiation factor 15	8.36095	2.98244e-08	2.92074e-06
FOLH1	folate hydrolase 1	8.27578	3.79442e-09	1.35218e-06
KLK4	kallikrein related peptidase 4	8.27513	1.03436e-07	5.02644e-06
SYT4	synaptotagmin 4	8.2195	4.77014e-06	5.33595e-05
PRKD1	protein kinase D1	8.18896	1.81334e-09	1.1056e-06
HPN	hepsin	8.08712	7.79328e-09	1.66633e-06
SLC44A4	solute carrier family 44 member 4	8.03008	7.76651e-09	1.66633e-06
SNRPN	small nuclear ribonucleoprotein polypeptide N	8.01381	5.57937e-09	1.43155e-06
MME	membrane metalloendopeptidase	7.94307	4.17367e-08	3.35391e-06
PRUNE2	prune homolog 2	7.86602	4.05533e-05	0.000262359
RAB25	RAB25, member RAS oncogene family	7.82869	1.32673e-10	1.05313e-06
LAD1	ladinin 1	7.80174	1.10425e-08	1.95159e-06
ST14	suppression of tumorigenicity 14	7.77528	1.19989e-08	1.95159e-06
PRSS8	protease, serine 8	7.77121	1.33561e-08	2.03983e-06
LSR	lipolysis stimulated lipoprotein receptor	7.7352	1.50043e-09	1.06996e-06
MT1G	metallothionein 1G	7.62466	6.75389e-09	1.63482e-06
CDH1	cadherin 1	7.623	1.10553e-05	9.85605e-05
PRAME	preferentially expressed antigen in melanoma	7.62241	1.5082e-08	2.20563e-06
EPCAM	epithelial cell adhesion molecule	7.61545	5.41123e-10	1.06996e-06
CBS	cystathionine-beta-synthase	7.61339	4.55812e-09	1.42147e-06
PRAC1	PRAC1 small nuclear protein	7.57641	1.30949e-07	5.67548e-06
IGFBP2	insulin like growth factor binding protein 2	7.49356	4.06509e-10	1.05313e-06
GUCY1A3	guanylate cyclase 1 soluble subunit alpha	7.45675	5.33459e-07	1.29371e-05
MAGEA6	MAGE family member A6	7.45129	1.84496e-10	1.05313e-06
NDUFA4L2	NDUFA4, mitochondrial complex associated like 2	7.41368	9.49959e-08	4.91856e-06
SPDEF	SAM pointed domain containing ETS transcription factor	7.38374	3.03492e-08	2.94962e-06
NUPR1	nuclear protein 1, transcriptional regulator	7.35201	2.92966e-09	1.29602e-06
GLYATL1	glycine-N-acyltransferase like 1	7.3394	1.09282e-09	1.06996e-06
ST6GALNAC1	ST6 N-acetylgalactosaminide alpha-2,6-sialyltransferase 1	7.2905	2.10251e-08	2.40831e-06
ACPP	acid phosphatase, prostate	7.24608	6.95261e-07	1.5247e-05
EPN3	epsin 3	7.24502	3.83733e-08	3.18726e-06
SELENOP	selenoprotein P	7.22483	2.021e-07	7.22851e-06
MGMT	O-6-methylguanine-DNA methyltransferase	7.18558	8.60741e-10	1.06996e-06
PLA2G2A	phospholipase A2 group IIA	7.13202	2.74617e-07	8.78943e-06
NETO1	neuropilin and tolloid like 1	7.13037	2.03736e-08	2.35471e-06
B4GALNT4	beta-1,4-N-acetyl-galactosaminyltransferase 4	7.11549	1.30751e-09	1.06996e-06
SNURF	SNRPN upstream reading frame	7.06353	1.10514e-08	1.95159e-06
RIPOR2	RHO family interacting cell polarization regulator 2	7.06056	1.05978e-06	1.96688e-05
ALOX15	arachidonate 15-lipoxygenase	7.01749	1.2016e-08	1.95159e-06
THNSL2	threonine synthase like 2	6.98523	7.07507e-10	1.06996e-06
SELENBP1	selenium binding protein 1	6.95216	3.08207e-09	1.3139e-06
SLC19A1	solute carrier family 19 member 1	6.94123	2.38589e-08	2.63867e-06
EHF	ETS homologous factor	6.88306	2.87447e-06	3.78134e-05
TRPV6	transient receptor potential cation channel subfamily V member 6	6.8818	1.89595e-09	1.1056e-06
IRF6	interferon regulatory factor 6	6.87938	4.78151e-08	3.44878e-06
SYNE4	spectrin repeat containing nuclear envelope family member 4	6.86169	1.06523e-09	1.06996e-06
SPINT2	serine peptidase inhibitor, Kunitz type 2	6.8531	4.08566e-10	1.05313e-06
KCNN2	potassium calcium-activated channel subfamily N member 2	6.84155	4.6234e-08	3.43588e-06
SLC16A1	solute carrier family 16 member 1	6.82203	7.81896e-07	1.6465e-05
CLDN3	claudin 3	6.78957	7.21553e-09	1.65201e-06
TC2N	tandem C2 domains, nuclear	6.73303	1.05154e-07	5.09065e-06
NETO2	neuropilin and tolloid like 2	6.68346	1.50123e-09	1.06996e-06
EIF1AY	eukaryotic translation initiation factor 1A, Y-linked	6.68149	4.4762e-09	1.42147e-06
PRAC2	prostate cancer susceptibility candidate 2	6.67472	4.41599e-09	1.42147e-06
ADRA2A	adrenoceptor alpha 2A	6.66223	3.59324e-06	4.38191e-05
TBX3	T-box 3	6.66165	3.97222e-07	1.07965e-05
PLA2G4F	phospholipase A2 group IVF	6.65354	1.85176e-08	2.30983e-06
SEMA4A	semaphorin 4A	6.63358	2.28138e-08	2.56735e-06
PROM2	prominin 2	6.59027	1.5754e-07	6.29813e-06
ANGPT2	angiopoietin 2	6.58227	1.5169e-07	6.17786e-06
LPAR3	lysophosphatidic acid receptor 3	6.58037	8.33046e-08	4.54772e-06
FOXA1	forkhead box A1	6.55559	1.67528e-06	2.65008e-05
TSTD1	thiosulfate sulfurtransferase like domain containing 1	6.5547	1.65527e-08	2.25742e-06
USP9Y	ubiquitin specific peptidase 9, Y-linked	6.53411	9.78685e-06	9.01979e-05
NUP210	nucleoporin 210	6.51402	2.15169e-05	0.000161996
KRTCAP3	keratinocyte associated protein 3	6.48805	5.26577e-09	1.42147e-06
FAM83H	family with sequence similarity 83 member H	6.41977	1.84608e-05	0.000145565
FAAH	fatty acid amide hydrolase	6.39594	7.38592e-10	1.06996e-06
TMEM45B	transmembrane protein 45B	6.39389	4.85293e-08	3.45879e-06
DNASE2B	deoxyribonuclease 2 beta	6.34546	2.66172e-09	1.21954e-06
AGR2	anterior gradient 2, protein disulphide isomerase family member	6.34327	1.29748e-07	5.67548e-06
EPHX2	epoxide hydrolase 2	6.33274	3.58458e-09	1.3139e-06
GLB1L2	galactosidase beta 1 like 2	6.31739	5.00351e-08	3.50765e-06
SPINT1	serine peptidase inhibitor, Kunitz type 1	6.31643	1.00341e-06	1.90458e-05
TMC4	transmembrane channel like 4	6.31573	4.71651e-07	1.21889e-05
H2AFY2	H2A histone family member Y2	6.31368	2.9474e-08	2.90916e-06
HMGCS2	3-hydroxy-3-methylglutaryl-CoA synthase 2	6.2599	5.90036e-07	1.39152e-05
MARVELD2	MARVEL domain containing 2	6.25094	1.75569e-06	2.73347e-05
GAL	galanin and GMAP prepropeptide	6.22992	2.01685e-08	2.3522e-06
DDX3Y	DEAD-box helicase 3, Y-linked	6.22769	2.37881e-07	7.96809e-06
CTSF	cathepsin F	6.15223	7.06619e-09	1.65201e-06
PTPN6	protein tyrosine phosphatase, non-receptor type 6	6.1102	7.32737e-09	1.65201e-06
SLC27A5	solute carrier family 27 member 5	6.085	4.3338e-07	1.14197e-05
LUZP2	leucine zipper protein 2	6.07243	1.21699e-08	1.95159e-06
NLRP2	NLR family pyrin domain containing 2	6.06322	1.57588e-07	6.29813e-06
C1orf116	chromosome 1 open reading frame 116	6.03437	1.93487e-05	0.000150299
BMPR1B	bone morphogenetic protein receptor type 1B	6.02808	1.5891e-06	2.5547e-05
MAGEA10	MAGE family member A10	5.9998	4.348e-08	3.38351e-06
SCNN1A	sodium channel epithelial 1 alpha subunit	5.99197	6.84678e-07	1.50879e-05
TARP	TCR gamma alternate reading frame protein	5.98858	1.64575e-06	2.61304e-05
APOD	apolipoprotein D	5.98383	6.9328e-08	4.15605e-06
COBL	cordon-bleu WH2 repeat protein	5.97699	6.27277e-07	1.43703e-05
PRR15L	proline rich 15 like	5.9569	3.61959e-08	3.16529e-06
PODXL2	podocalyxin like 2	5.95352	2.12858e-09	1.1866e-06
MYH14	myosin heavy chain 14	5.94412	6.11018e-06	6.39376e-05
SMO	smoothened, frizzled class receptor	5.94338	1.08943e-08	1.95159e-06
CGNL1	cingulin like 1	5.91441	1.19834e-05	0.000104725
CLDN8	claudin 8	5.89437	7.97018e-08	4.50438e-06
GLYATL2	glycine-N-acyltransferase like 2	5.89312	1.97125e-07	7.22851e-06
PARVB	parvin beta	5.88984	4.90031e-09	1.42147e-06
PPP1R1B	protein phosphatase 1 regulatory inhibitor subunit 1B	5.88026	9.31202e-06	8.70094e-05
GCHFR	GTP cyclohydrolase I feedback regulator	5.86168	1.10984e-07	5.2285e-06
MB	myoglobin	5.82145	8.3077e-09	1.7472e-06
RAB17	RAB17, member RAS oncogene family	5.80593	3.35166e-09	1.3139e-06
HSD11B2	hydroxysteroid 11-beta dehydrogenase 2	5.80134	2.62638e-08	2.78485e-06
EPPK1	epiplakin 1	5.77888	4.79152e-06	5.34526e-05
SULT1A1	sulfotransferase family 1A member 1	5.75696	7.46314e-09	1.65201e-06
KLHL9	kelch like family member 9	5.75467	1.26109e-06	2.18334e-05
SMPDL3B	sphingomyelin phosphodiesterase acid like 3B	5.74362	1.18728e-08	1.95159e-06
MT1F	metallothionein 1F	5.73802	2.02515e-07	7.22851e-06
KDM5D	lysine demethylase 5D	5.73061	1.83847e-06	2.83142e-05
ESRP2	epithelial splicing regulatory protein 2	5.72761	5.00832e-07	1.25466e-05
KDF1	keratinocyte differentiation factor 1	5.70921	2.71895e-08	2.83588e-06
CRYAB	crystallin alpha B	5.70645	3.44705e-09	1.3139e-06
CLDN4	claudin 4	5.69568	4.66009e-08	3.43588e-06
ZG16B	zymogen granule protein 16B	5.68985	2.04031e-07	7.23075e-06
GSTT1	glutathione S-transferase theta 1	5.68254	4.24141e-09	1.42147e-06
SLC22A17	solute carrier family 22 member 17	5.66266	3.33702e-08	3.0799e-06
HIST3H2A	histone cluster 3 H2A	5.65856	3.85085e-08	3.18726e-06
CAMSAP3	calmodulin regulated spectrin associated protein family member 3	5.65312	6.0605e-07	1.40676e-05
FAM83F	family with sequence similarity 83 member F	5.65215	1.06407e-08	1.95159e-06
PDZRN3	PDZ domain containing ring finger 3	5.645	3.98128e-06	4.70311e-05
GPRC5C	G protein-coupled receptor class C group 5 member C	5.64107	4.3946e-08	3.38351e-06
CAPN13	calpain 13	5.62637	1.85486e-08	2.30983e-06
PCSK1N	proprotein convertase subtilisin/kexin type 1 inhibitor	5.61844	3.7711e-08	3.16859e-06
GNMT	glycine N-methyltransferase	5.61645	7.46877e-09	1.65201e-06
NCAM2	neural cell adhesion molecule 2	5.61291	1.53013e-08	2.20563e-06
TRPM8	transient receptor potential cation channel subfamily M member 8	5.60547	1.54872e-05	0.000127772
FAM198B	family with sequence similarity 198 member B	5.60177	0.00083584	0.00281591
TMEM125	transmembrane protein 125	5.58687	1.86229e-07	7.06842e-06
SLC30A4	solute carrier family 30 member 4	5.57823	4.76693e-08	3.44878e-06
EFS	embryonal Fyn-associated substrate	5.54596	1.17514e-06	2.09679e-05
TUBA3D	tubulin alpha 3d	5.50283	1.62455e-08	2.24101e-06
MAOA	monoamine oxidase A	5.48242	6.37436e-08	3.95057e-06
ALDH3B2	aldehyde dehydrogenase 3 family member B2	5.47865	1.51526e-07	6.17786e-06
UGT2B17	UDP glucuronosyltransferase family 2 member B17	5.46307	4.6986e-06	5.26909e-05
GPRIN2	G protein regulated inducer of neurite outgrowth 2	5.44815	6.589e-07	1.47816e-05
STEAP2	STEAP2 metalloreductase	5.44535	8.81683e-07	1.74413e-05
GRIN3A	glutamate ionotropic receptor NMDA type subunit 3A	5.42231	4.93463e-05	0.000304959
ULK2	unc-51 like autophagy activating kinase 2	5.40686	5.23414e-08	3.56105e-06
SOWAHB	sosondowah ankyrin repeat domain family member B	5.39555	2.83377e-08	2.90835e-06
ENPP5	ectonucleotide pyrophosphatase/phosphodiesterase 5 (putative)	5.3849	2.58333e-07	8.45447e-06
RBM47	RNA binding motif protein 47	5.37783	1.97527e-05	0.000152217
CGREF1	cell growth regulator with EF-hand domain 1	5.36727	1.91539e-08	2.30983e-06
SLC45A3	solute carrier family 45 member 3	5.36644	4.02035e-07	1.08566e-05
TRPM2	transient receptor potential cation channel subfamily M member 2	5.36211	1.17511e-05	0.000103186
BSPRY	B-box and SPRY domain containing	5.35968	1.5186e-08	2.20563e-06
ELF3	E74 like ETS transcription factor 3	5.3555	2.97611e-07	9.17344e-06
LARGE2	LARGE xylosyl- and glucuronyltransferase 2	5.35253	3.30792e-07	9.58164e-06
UGT2B11	UDP glucuronosyltransferase family 2 member B11	5.34725	3.82962e-06	4.57026e-05
CHDH	choline dehydrogenase	5.33971	3.34141e-06	4.19581e-05
FUOM	fucose mutarotase	5.32461	3.31028e-08	3.07736e-06
CAMK2B	calcium/calmodulin dependent protein kinase II beta	5.32412	4.45898e-08	3.40501e-06
GRIK1	glutamate ionotropic receptor kainate type subunit 1	5.30225	5.431e-07	1.31287e-05
ARHGAP6	Rho GTPase activating protein 6	5.2973	1.07365e-07	5.13916e-06
PDZK1IP1	PDZK1 interacting protein 1	5.29673	2.41277e-08	2.6456e-06
RAB26	RAB26, member RAS oncogene family	5.29434	9.43713e-08	4.91856e-06
NDN	necdin, MAGE family member	5.28647	4.50056e-08	3.4123e-06
RIMKLA	ribosomal modification protein rimK like family member A	5.28423	3.67343e-08	3.16529e-06
HIST1H2AE	histone cluster 1 H2A family member e	5.26867	3.13451e-08	3.00094e-06
CBLC	Cbl proto-oncogene C	5.23679	1.81529e-08	2.30983e-06
ZNF883	zinc finger protein 883	5.22974	2.98893e-07	9.17344e-06
PPFIA2	PTPRF interacting protein alpha 2	5.22661	2.98386e-07	9.17344e-06
TUBA3E	tubulin alpha 3e	5.21714	1.16627e-07	5.39181e-06
SLC27A2	solute carrier family 27 member 2	5.21671	3.8743e-07	1.06204e-05
SLC7A8	solute carrier family 7 member 8	5.21598	9.12444e-06	8.57564e-05
ZBTB16	zinc finger and BTB domain containing 16	5.21293	1.86756e-06	2.8659e-05
C11orf52	chromosome 11 open reading frame 52	5.21164	1.54965e-08	2.20604e-06
TTC39A	tetratricopeptide repeat domain 39A	5.20837	1.36861e-06	2.30722e-05
TFF3	trefoil factor 3	5.19166	8.82353e-08	4.72253e-06
LPAR6	lysophosphatidic acid receptor 6	5.16716	2.32651e-08	2.59537e-06
MAL2	mal, T-cell differentiation protein 2 (gene/pseudogene)	5.15312	2.136e-07	7.41492e-06
GRHL2	grainyhead like transcription factor 2	5.14681	7.82812e-05	0.000438737
DLL3	delta like canonical Notch ligand 3	5.11531	3.9811e-07	1.07978e-05
PRKCZ	protein kinase C zeta	5.08599	1.14863e-08	1.95159e-06
ASRGL1	asparaginase like 1	5.08407	9.82092e-08	4.94088e-06
KIF1A	kinesin family member 1A	5.0698	2.25819e-05	0.000167362
PDIA2	protein disulfide isomerase family A member 2	5.06812	1.71492e-05	0.00013814
SLC6A8	solute carrier family 6 member 8	5.05419	3.33105e-07	9.58164e-06
GABRB3	gamma-aminobutyric acid type A receptor beta3 subunit	5.04043	1.26082e-06	2.18334e-05
KLHL35	kelch like family member 35	5.0369	3.72753e-07	1.03806e-05
TNFRSF19	TNF receptor superfamily member 19	5.03337	1.62584e-06	2.59296e-05
TMEM98	transmembrane protein 98	5.02862	1.82318e-08	2.30983e-06
MEST	mesoderm specific transcript	5.02048	1.97094e-07	7.22851e-06
MTAP	methylthioadenosine phosphorylase	5.01773	1.10433e-07	5.22785e-06
HES6	hes family bHLH transcription factor 6	5.01401	2.02809e-07	7.22851e-06
KLHDC9	kelch domain containing 9	5.00397	7.86099e-08	4.48216e-06
ACSM1	acyl-CoA synthetase medium chain family member 1	4.98968	4.18291e-08	3.35391e-06
NDRG2	NDRG family member 2	4.98961	1.11751e-06	2.0278e-05
SHC2	SHC adaptor protein 2	4.98897	7.27062e-08	4.25886e-06
TJP3	tight junction protein 3	4.97871	2.74734e-07	8.78943e-06
ZP3	zona pellucida glycoprotein 3	4.97775	9.70529e-08	4.94084e-06
WNK2	WNK lysine deficient protein kinase 2	4.97585	0.000262923	0.00112557
BMX	BMX non-receptor tyrosine kinase	4.97116	2.18349e-06	3.16162e-05
PRR36	proline rich 36	4.96829	0.000151673	0.000733542
PKIB	cAMP-dependent protein kinase inhibitor beta	4.96774	9.93533e-07	1.89956e-05
STX19	syntaxin 19	4.96519	5.71578e-08	3.77978e-06
CHRNA2	cholinergic receptor nicotinic alpha 2 subunit	4.96417	8.82332e-07	1.74413e-05
UPK3A	uroplakin 3A	4.9598	2.6266e-08	2.78485e-06
TP53I11	tumor protein p53 inducible protein 11	4.94088	4.94019e-07	1.24358e-05
CCDC78	coiled-coil domain containing 78	4.93858	1.53041e-07	6.19355e-06
ARHGDIG	Rho GDP dissociation inhibitor gamma	4.93277	1.98235e-06	2.95372e-05
CDKN2A	cyclin dependent kinase inhibitor 2A	4.93051	4.40444e-08	3.38351e-06
HPR	haptoglobin-related protein	4.92566	3.70301e-08	3.16706e-06
RORC	RAR related orphan receptor C	4.9239	1.75953e-06	2.73612e-05
ORM1	orosomucoid 1	4.92348	1.47821e-07	6.09773e-06
	NA	4.91821	5.41545e-08	3.61848e-06
STC2	stanniocalcin 2	4.90242	1.62704e-06	2.59296e-05
GJB1	gap junction protein beta 1	4.89437	2.836e-07	8.89561e-06
FKBP11	FK506 binding protein 11	4.89305	8.41531e-08	4.54907e-06
CRB3	crumbs 3, cell polarity complex component	4.88231	5.5178e-08	3.66777e-06
KCTD15	potassium channel tetramerization domain containing 15	4.86396	9.09478e-08	4.82136e-06
NKX3-1	NK3 homeobox 1	4.86339	2.97201e-05	0.00020835
ESRP1	epithelial splicing regulatory protein 1	4.85558	6.8112e-06	6.96262e-05
SLC4A4	solute carrier family 4 member 4	4.85232	2.00493e-06	2.98391e-05
BLNK	B-cell linker	4.85209	6.01186e-08	3.83712e-06
CSMD1	CUB and Sushi multiple domains 1	4.84813	2.60618e-05	0.00018752
PLEKHB1	pleckstrin homology domain containing B1	4.84127	6.4998e-07	1.46806e-05
RNF157	ring finger protein 157	4.83931	2.29889e-05	0.00016958
DNAJC12	DnaJ heat shock protein family (Hsp40) member C12	4.83371	4.54004e-07	1.18382e-05
IQGAP2	IQ motif containing GTPase activating protein 2	4.832	2.89903e-05	0.000204462
RASEF	RAS and EF-hand domain containing	4.82526	4.56375e-05	0.000287012
FBXO2	F-box protein 2	4.81996	5.8048e-08	3.79948e-06
	NA	4.81785	1.34629e-07	5.76571e-06
C1orf210	chromosome 1 open reading frame 210	4.81581	3.28529e-08	3.07736e-06
RSPH1	radial spoke head 1 homolog	4.80983	3.49528e-08	3.15782e-06
OLFM2	olfactomedin 2	4.80337	8.53199e-07	1.72373e-05
AR	androgen receptor	4.7961	8.16821e-05	0.000453048
SLC12A8	solute carrier family 12 member 8	4.7746	3.27411e-07	9.55292e-06
TMEM52	transmembrane protein 52	4.74513	4.52955e-07	1.1835e-05
AMACR	alpha-methylacyl-CoA racemase	4.7395	8.81566e-07	1.74413e-05
COLEC12	collectin subfamily member 12	4.73624	1.07759e-07	5.13916e-06
PRKACB	protein kinase cAMP-activated catalytic subunit beta	4.73111	1.98732e-07	7.22851e-06
RHOV	ras homolog family member V	4.72095	4.35024e-08	3.38351e-06
RANBP3L	RAN binding protein 3 like	4.71828	2.60194e-06	3.50266e-05
ZNF300	zinc finger protein 300	4.7134	1.97841e-07	7.22851e-06
TTR	transthyretin	4.71253	1.5039e-07	6.16409e-06
CIART	circadian associated repressor of transcription	4.7079	1.25522e-07	5.56428e-06
OVOL2	ovo like zinc finger 2	4.70737	6.23669e-08	3.92208e-06
UGT2B15	UDP glucuronosyltransferase family 2 member B15	4.70575	2.90216e-05	0.00020457
GRTP1	growth hormone regulated TBC protein 1	4.70209	2.62765e-07	8.53421e-06
OR51E1	olfactory receptor family 51 subfamily E member 1	4.69203	6.06389e-07	1.40676e-05
SYTL1	synaptotagmin like 1	4.68956	4.78511e-08	3.44878e-06
FAM69B	family with sequence similarity 69 member B	4.68603	7.30337e-08	4.25886e-06
SULT2B1	sulfotransferase family 2B member 1	4.68374	7.00938e-08	4.15605e-06
NUDT8	nudix hydrolase 8	4.68218	2.59964e-07	8.48621e-06
IRX4	iroquois homeobox 4	4.67982	1.05922e-07	5.10854e-06
VIPR1	vasoactive intestinal peptide receptor 1	4.67126	2.49955e-07	8.20122e-06
RAB11FIP4	RAB11 family interacting protein 4	4.66727	2.95772e-06	3.84444e-05
GSTA1	glutathione S-transferase alpha 1	4.66412	2.69081e-07	8.65173e-06
GHR	growth hormone receptor	4.66404	9.3961e-06	8.73496e-05
RBP7	retinol binding protein 7	4.66031	5.05644e-07	1.25715e-05
FOCAD	focadhesin	4.64876	1.44302e-06	2.40422e-05
MCF2L	MCF.2 cell line derived transforming sequence like	4.64673	1.85342e-05	0.000145785
ATP10A	ATPase phospholipid transporting 10A (putative)	4.64433	5.14641e-07	1.26968e-05
NOVA1	NOVA alternative splicing regulator 1	4.64049	0.000727281	0.00251219
DNAH8	dynein axonemal heavy chain 8	4.63799	6.10436e-07	1.41239e-05
CERS4	ceramide synthase 4	4.63781	9.51736e-07	1.84438e-05
MPC2	mitochondrial pyruvate carrier 2	4.63201	2.15834e-08	2.45039e-06
PIFO	primary cilia formation	4.62842	8.37386e-08	4.54907e-06
KCND3	potassium voltage-gated channel subfamily D member 3	4.61292	3.13186e-05	0.000216596
BHLHA15	basic helix-loop-helix family member a15	4.61084	8.81503e-07	1.74413e-05
BICDL2	BICD family like cargo adaptor 2	4.60754	3.3145e-07	9.58164e-06
GADD45G	growth arrest and DNA damage inducible gamma	4.60083	8.48342e-07	1.72373e-05
COL26A1	collagen type XXVI alpha 1 chain	4.59729	3.10827e-07	9.29509e-06
CPE	carboxypeptidase E	4.58894	1.18193e-07	5.39608e-06
DPYSL4	dihydropyrimidinase like 4	4.58032	4.9149e-06	5.45915e-05
MXRA8	matrix remodeling associated 8	4.57772	3.74729e-08	3.16859e-06
TM7SF2	transmembrane 7 superfamily member 2	4.56841	5.98685e-08	3.83712e-06
AZGP1	alpha-2-glycoprotein 1, zinc-binding	4.56133	2.0633e-07	7.25207e-06
HLA-DMB	major histocompatibility complex, class II, DM beta	4.55819	2.40246e-06	3.35742e-05
HENMT1	HEN methyltransferase 1	4.55182	6.85247e-07	1.50879e-05
DENND1C	DENN domain containing 1C	4.55149	3.31141e-06	4.17309e-05
PGC	progastricsin	4.52903	1.07604e-05	9.66623e-05
MAP7	microtubule associated protein 7	4.52053	4.99956e-06	5.5245e-05
C5orf38	chromosome 5 open reading frame 38	4.51268	1.00347e-06	1.90458e-05
SETBP1	SET binding protein 1	4.50712	4.02097e-05	0.000260662
GSPT2	G1 to S phase transition 2	4.49341	7.96134e-07	1.65805e-05
F5	coagulation factor V	4.49151	0.000657544	0.00231876
MMP7	matrix metallopeptidase 7	4.46281	0.000811469	0.00274534
ELMO3	engulfment and cell motility 3	4.46103	2.77655e-07	8.81752e-06
PALMD	palmdelphin	4.45955	6.7285e-06	6.88995e-05
TGM3	transglutaminase 3	4.45831	4.23066e-06	4.89848e-05
LENG9	leukocyte receptor cluster member 9	4.45171	6.97092e-08	4.15605e-06
TSPAN13	tetraspanin 13	4.45049	1.0724e-06	1.97954e-05
CALML4	calmodulin like 4	4.44155	1.43861e-07	6.0447e-06
SYT7	synaptotagmin 7	4.44154	3.04388e-05	0.000212112
ZNF287	zinc finger protein 287	4.42899	9.24854e-07	1.79772e-05
SLC2A12	solute carrier family 2 member 12	4.42656	1.91228e-06	2.89984e-05
PHGR1	proline, histidine and glycine rich 1	4.40774	2.85038e-07	8.89721e-06
METTL7A	methyltransferase like 7A	4.402	6.49773e-06	6.70092e-05
CXCL16	C-X-C motif chemokine ligand 16	4.39548	6.17972e-07	1.42078e-05
ACTL10	actin like 10	4.39197	3.09482e-07	9.27651e-06
MMP15	matrix metallopeptidase 15	4.39112	6.53531e-05	0.000379817
KIF5C	kinesin family member 5C	4.38853	1.8179e-05	0.000143784
PRR5	proline rich 5	4.38107	1.65139e-07	6.51868e-06
CDC42BPG	CDC42 binding protein kinase gamma	4.3656	2.31964e-05	0.000170635
MAGEC2	MAGE family member C2	4.36098	5.61885e-06	6.00202e-05
GATA2	GATA binding protein 2	4.35448	3.54638e-05	0.000237458
ATP2C2	ATPase secretory pathway Ca2+ transporting 2	4.34136	1.48148e-06	2.43978e-05
ABAT	4-aminobutyrate aminotransferase	4.34005	4.10417e-05	0.000264452
GLS2	glutaminase 2	4.33994	2.44255e-06	3.39129e-05
GPNMB	glycoprotein nmb	4.32887	2.02588e-06	3.01159e-05
VCX	variable charge, X-linked	4.32597	0.000146361	0.000712205
SLC22A23	solute carrier family 22 member 23	4.3146	1.42101e-05	0.000119151
SFTPA2	surfactant protein A2	4.30872	4.30577e-06	4.94971e-05
PLA2G7	phospholipase A2 group VII	4.30693	8.63822e-07	1.73699e-05
NRN1	neuritin 1	4.30396	1.9401e-07	7.22851e-06
PCSK6	proprotein convertase subtilisin/kexin type 6	4.30055	6.13161e-06	6.40573e-05
BAIAP3	BAI1 associated protein 3	4.28834	7.64345e-07	1.63361e-05
KIAA1257	KIAA1257	4.28522	7.66626e-07	1.63361e-05
ACKR3	atypical chemokine receptor 3	4.28243	2.62426e-05	0.000188609
KCNC2	potassium voltage-gated channel subfamily C member 2	4.2769	2.08797e-05	0.000158417
UTY	ubiquitously transcribed tetratricopeptide repeat containing, Y-linked	4.26892	1.9286e-06	2.91083e-05
CFAP69	cilia and flagella associated protein 69	4.26726	1.34582e-06	2.28078e-05
PIK3AP1	phosphoinositide-3-kinase adaptor protein 1	4.26719	7.80156e-07	1.64616e-05
KCNH2	potassium voltage-gated channel subfamily H member 2	4.26033	6.99827e-07	1.52688e-05
CNKSR1	connector enhancer of kinase suppressor of Ras 1	4.2591	1.54363e-06	2.5131e-05
ZFY	zinc finger protein, Y-linked	4.25672	2.86517e-06	3.77772e-05
MARVELD3	MARVEL domain containing 3	4.25252	2.23058e-06	3.1976e-05
LRRN1	leucine rich repeat neuronal 1	4.24622	1.31319e-06	2.25023e-05
TOX3	TOX high mobility group box family member 3	4.24517	0.00205957	0.00584561
RAMP1	receptor activity modifying protein 1	4.23774	1.93595e-06	2.91506e-05
EXOC3-AS1	EXOC3 antisense RNA 1	4.23635	1.69222e-07	6.61873e-06
ERBB3	erb-b2 receptor tyrosine kinase 3	4.22501	4.08162e-05	0.000263528
FZD9	frizzled class receptor 9	4.21315	2.44562e-07	8.10719e-06
CNTLN	centlein	4.19144	1.61612e-06	2.58842e-05
TSPAN8	tetraspanin 8	4.18816	0.000405222	0.00158832
TUBB4A	tubulin beta 4A class IVa	4.18447	0.000296046	0.00123572
RBBP8NL	RBBP8 N-terminal like	4.18341	1.08197e-06	1.98478e-05
EPHA1	EPH receptor A1	4.18019	2.64407e-06	3.5408e-05
ADCY1	adenylate cyclase 1	4.17389	2.2407e-07	7.64519e-06
GREB1	growth regulation by estrogen in breast cancer 1	4.17195	3.63193e-05	0.000241545
FAAH2	fatty acid amide hydrolase 2	4.17068	2.90063e-07	9.01109e-06
ZNF812P	zinc finger protein 812, pseudogene	4.16446	1.96198e-06	2.93702e-05
SHROOM3	shroom family member 3	4.164	0.000466894	0.00177195
ADAM7	ADAM metallopeptidase domain 7	4.1571	2.49169e-06	3.4335e-05
CSGALNACT1	chondroitin sulfate N-acetylgalactosaminyltransferase 1	4.15349	5.01788e-05	0.000308454
VWF	von Willebrand factor	4.15279	5.75475e-07	1.36718e-05
MMEL1	membrane metalloendopeptidase like 1	4.14924	1.16281e-06	2.07768e-05
CASKIN1	CASK interacting protein 1	4.14636	2.44575e-06	3.39205e-05
DHRS13	dehydrogenase/reductase 13	4.13998	1.86862e-08	2.30983e-06
MAPK8IP2	mitogen-activated protein kinase 8 interacting protein 2	4.13758	7.96678e-06	7.79008e-05
NAALADL2	N-acetylated alpha-linked acidic dipeptidase like 2	4.12759	4.53773e-06	5.14483e-05
CREB3L4	cAMP responsive element binding protein 3 like 4	4.12747	2.82603e-08	2.90835e-06
ZNF229	zinc finger protein 229	4.1159	8.69605e-06	8.33532e-05
HOXA10	homeobox A10	4.11215	1.17263e-07	5.39181e-06
OAZ3	ornithine decarboxylase antizyme 3	4.11115	4.77723e-07	1.21889e-05
MPV17L	MPV17 mitochondrial inner membrane protein like	4.093	3.41064e-06	4.24107e-05
ORM2	orosomucoid 2	4.08102	1.8418e-06	2.83315e-05
AATK	apoptosis associated tyrosine kinase	4.07982	1.74258e-06	2.72297e-05
SESN3	sestrin 3	4.07833	6.66765e-05	0.000384917
ARHGAP28	Rho GTPase activating protein 28	4.07617	1.37546e-05	0.000116014
NAP1L2	nucleosome assembly protein 1 like 2	4.06798	1.98495e-05	0.000152495
NLGN4Y	neuroligin 4, Y-linked	4.06752	3.26434e-06	4.13816e-05
CACNA1D	calcium voltage-gated channel subunit alpha1 D	4.06002	7.21428e-06	7.2933e-05
TMPRSS13	transmembrane protease, serine 13	4.0569	3.34579e-06	4.19581e-05
ISYNA1	inositol-3-phosphate synthase 1	4.05167	1.93948e-06	2.91695e-05
HIST1H2BG	histone cluster 1 H2B family member g	4.04897	1.97945e-07	7.22851e-06
C16orf71	chromosome 16 open reading frame 71	4.04524	4.33501e-07	1.14197e-05
BEX4	brain expressed X-linked 4	4.03169	7.84168e-07	1.6465e-05
IGSF9	immunoglobulin superfamily member 9	4.02707	0.000119782	0.000611738
MAGEA1	MAGE family member A1	4.00113	6.1102e-07	1.41239e-05
ZNF677	zinc finger protein 677	3.99815	2.14474e-07	7.41492e-06
GPC3	glypican 3	3.99343	4.48555e-06	5.11512e-05
MSX1	msh homeobox 1	3.99327	3.75304e-07	1.03846e-05
DHRS7	dehydrogenase/reductase 7	3.98776	5.42926e-09	1.42147e-06
EHD3	EH domain containing 3	3.98478	4.4844e-06	5.11512e-05
HSD17B14	hydroxysteroid 17-beta dehydrogenase 14	3.9846	3.18898e-06	4.05867e-05
HSH2D	hematopoietic SH2 domain containing	3.98266	5.24469e-07	1.2816e-05
BOLA1	bolA family member 1	3.97831	4.60093e-07	1.19727e-05
ZBTB42	zinc finger and BTB domain containing 42	3.97034	1.15516e-06	2.06688e-05
DDC	dopa decarboxylase	3.96795	0.000355488	0.00142562
KCNH8	potassium voltage-gated channel subfamily H member 8	3.96686	6.60387e-05	0.000382364
MKRN3	makorin ring finger protein 3	3.96309	1.8425e-07	7.01409e-06
CTSH	cathepsin H	3.96284	3.89259e-08	3.20116e-06
HOOK1	hook microtubule tethering protein 1	3.94952	0.000127263	0.000641262
CYP4F11	cytochrome P450 family 4 subfamily F member 11	3.94837	9.41997e-06	8.74633e-05
MAF	MAF bZIP transcription factor	3.94425	0.0001768	0.000825347
SLC6A11	solute carrier family 6 member 11	3.93954	3.75591e-07	1.03846e-05
ARSA	arylsulfatase A	3.93949	8.22321e-06	7.99208e-05
DGCR6	DiGeorge syndrome critical region gene 6	3.9371	4.7795e-06	5.33648e-05
DIO3	iodothyronine deiodinase 3	3.9283	8.6375e-05	0.000473145
ACSM3	acyl-CoA synthetase medium chain family member 3	3.92579	4.77102e-06	5.33595e-05
RNF43	ring finger protein 43	3.92493	7.50739e-06	7.49513e-05
TRPM4	transient receptor potential cation channel subfamily M member 4	3.92194	2.4346e-07	8.10719e-06
BICDL1	BICD family like cargo adaptor 1	3.91923	3.74797e-06	4.51905e-05
THSD7A	thrombospondin type 1 domain containing 7A	3.91922	0.000429048	0.00166228
ALDH1A3	aldehyde dehydrogenase 1 family member A3	3.91719	3.1532e-05	0.000217448
RHOD	ras homolog family member D	3.91714	8.94949e-06	8.48581e-05
KCNQ1	potassium voltage-gated channel subfamily Q member 1	3.91093	4.29741e-07	1.13908e-05
SLC25A33	solute carrier family 25 member 33	3.91066	4.89301e-08	3.46809e-06
ZIK1	zinc finger protein interacting with K protein 1	3.90578	7.66203e-06	7.57873e-05
LRRTM3	leucine rich repeat transmembrane neuronal 3	3.90316	0.0138477	0.0281016
SLC37A1	solute carrier family 37 member 1	3.9006	1.25421e-05	0.000108206
CKB	creatine kinase B	3.89868	5.69417e-09	1.43236e-06
SLC12A7	solute carrier family 12 member 7	3.89851	8.62506e-05	0.000472665
WDR72	WD repeat domain 72	3.8978	4.78559e-07	1.21889e-05
CLEC11A	C-type lectin domain containing 11A	3.88613	1.20386e-05	0.000104992
EEPD1	endonuclease/exonuclease/phosphatase family domain containing 1	3.88503	1.97473e-06	2.9458e-05
ZNF518B	zinc finger protein 518B	3.88096	0.000185593	0.000855239
DNASE1	deoxyribonuclease 1	3.88061	7.0105e-05	0.000399901
BTG2	BTG anti-proliferation factor 2	3.87069	3.43175e-05	0.000231472
SMKR1	small lysine rich protein 1	3.86748	4.9145e-06	5.45915e-05
RAB3B	RAB3B, member RAS oncogene family	3.86725	5.70752e-05	0.00034025
DHRS3	dehydrogenase/reductase 3	3.85611	1.34824e-05	0.000114623
TMSB15A	thymosin beta 15a	3.85442	1.14188e-06	2.0517e-05
CDS1	CDP-diacylglycerol synthase 1	3.85294	8.30255e-06	8.04482e-05
LRRC26	leucine rich repeat containing 26	3.84312	8.23699e-08	4.53529e-06
GTF2H2	general transcription factor IIH subunit 2	3.84025	1.97175e-06	2.94477e-05
SEC11C	SEC11 homolog C, signal peptidase complex subunit	3.83892	2.94244e-08	2.90916e-06
	NA	3.83892	0.000105842	0.000552868
SESN1	sestrin 1	3.83551	1.84845e-05	0.0001456
TRAPPC6A	trafficking protein particle complex 6A	3.83105	8.84452e-07	1.74564e-05
PAGE1	PAGE family member 1	3.8252	7.90265e-05	0.000442335
GYG2	glycogenin 2	3.82275	3.70206e-06	4.48198e-05
DDX43	DEAD-box helicase 43	3.81354	4.50241e-07	1.1788e-05
QRICH2	glutamine rich 2	3.81237	1.75613e-07	6.76557e-06
SNN	stannin	3.81161	7.81895e-06	7.67478e-05
PLA1A	phospholipase A1 member A	3.8026	7.15111e-06	7.24657e-05
JAG2	jagged 2	3.79548	7.36464e-06	7.40787e-05
PABPC5	poly(A) binding protein cytoplasmic 5	3.79086	3.91195e-07	1.06846e-05
CEBPA	CCAAT/enhancer binding protein alpha	3.789	3.91439e-07	1.06846e-05
ROGDI	rogdi homolog	3.78619	1.01691e-07	5.0144e-06
CCDC120	coiled-coil domain containing 120	3.78268	2.24562e-05	0.000166526
MARCKSL1	MARCKS like 1	3.776	5.01708e-07	1.25466e-05
MKRN2OS	MKRN2 opposite strand	3.77545	6.47436e-07	1.46524e-05
LHX2	LIM homeobox 2	3.77071	7.78172e-07	1.64492e-05
DPP4	dipeptidyl peptidase 4	3.76878	3.00704e-05	0.000210346
HIST1H2AD	histone cluster 1 H2A family member d	3.76761	6.63821e-07	1.48624e-05
REPS2	RALBP1 associated Eps domain containing 2	3.76671	2.52606e-05	0.000182471
HPGD	hydroxyprostaglandin dehydrogenase 15-(NAD)	3.76501	2.90892e-06	3.80026e-05
PKNOX2	PBX/knotted 1 homeobox 2	3.75496	7.36026e-06	7.40787e-05
DYRK1B	dual specificity tyrosine phosphorylation regulated kinase 1B	3.74232	1.77802e-06	2.75485e-05
NOSTRIN	nitric oxide synthase trafficking	3.73714	8.32872e-07	1.70959e-05
ZNF597	zinc finger protein 597	3.73489	4.10297e-07	1.09687e-05
MFSD3	major facilitator superfamily domain containing 3	3.73232	6.71605e-07	1.4974e-05
SYCE3	synaptonemal complex central element protein 3	3.73164	2.49815e-06	3.43871e-05
LRRC56	leucine rich repeat containing 56	3.72236	1.51277e-06	2.47716e-05
GRIN2C	glutamate ionotropic receptor NMDA type subunit 2C	3.71938	1.4515e-06	2.41521e-05
CWH43	cell wall biogenesis 43 C-terminal homolog	3.7102	1.70254e-05	0.000137284
SARM1	sterile alpha and TIR motif containing 1	3.70904	1.57937e-05	0.000129883
ZMYND15	zinc finger MYND-type containing 15	3.7059	9.99801e-06	9.1637e-05
MYRIP	myosin VIIA and Rab interacting protein	3.70439	2.15867e-05	0.000162236
MBLAC1	metallo-beta-lactamase domain containing 1	3.70309	2.92826e-06	3.81388e-05
MIPEP	mitochondrial intermediate peptidase	3.69754	2.5493e-06	3.46784e-05
ACOT11	acyl-CoA thioesterase 11	3.69201	3.61682e-06	4.40229e-05
ENTPD2	ectonucleoside triphosphate diphosphohydrolase 2	3.69171	0.000116459	0.000598102
EFHC2	EF-hand domain containing 2	3.69059	3.38661e-07	9.63345e-06
SIM2	single-minded family bHLH transcription factor 2	3.67851	9.04767e-05	0.000489345
C11orf71	chromosome 11 open reading frame 71	3.67193	7.78287e-07	1.64492e-05
CCDC74B	coiled-coil domain containing 74B	3.67016	2.91359e-06	3.80248e-05
AMHR2	anti-Mullerian hormone receptor type 2	3.66296	5.16428e-07	1.26968e-05
EVA1B	eva-1 homolog B	3.6624	4.13068e-06	4.81312e-05
STEAP1	STEAP family member 1	3.66214	1.22399e-07	5.46748e-06
EFNA3	ephrin A3	3.65774	6.95049e-07	1.5247e-05
PTPN18	protein tyrosine phosphatase, non-receptor type 18	3.65435	1.17359e-05	0.000103186
COL9A3	collagen type IX alpha 3 chain	3.65325	2.27989e-06	3.23906e-05
CISD3	CDGSH iron sulfur domain 3	3.65065	5.79328e-07	1.37379e-05
DUSP8	dual specificity phosphatase 8	3.64941	3.2257e-05	0.000221297
SMIM1	small integral membrane protein 1 (Vel blood group)	3.64903	1.2408e-05	0.000107338
FNDC10	fibronectin type III domain containing 10	3.64784	5.8117e-07	1.37562e-05
NUDT18	nudix hydrolase 18	3.64764	4.39918e-06	5.03004e-05
GPC4	glypican 4	3.63141	0.000172833	0.000810801
SLC9B2	solute carrier family 9 member B2	3.61241	6.9757e-07	1.52688e-05
PLPP6	phospholipid phosphatase 6	3.6123	4.4191e-06	5.04831e-05
VWA5A	von Willebrand factor A domain containing 5A	3.6039	3.78779e-05	0.000248943
LPAR2	lysophosphatidic acid receptor 2	3.60204	2.48746e-05	0.000180394
ATP6V0E2	ATPase H+ transporting V0 subunit e2	3.60104	9.25102e-08	4.88401e-06
TWIST1	twist family bHLH transcription factor 1	3.6003	6.98952e-07	1.52688e-05
GAREM2	GRB2 associated regulator of MAPK1 subtype 2	3.59596	9.20314e-07	1.79161e-05
CAB39L	calcium binding protein 39 like	3.58861	3.15998e-07	9.36244e-06
ZNF667	zinc finger protein 667	3.58343	8.61652e-07	1.73534e-05
EPHB3	EPH receptor B3	3.58122	5.91312e-05	0.000350552
ARHGEF38	Rho guanine nucleotide exchange factor 38	3.57568	2.91974e-05	0.000205134
PLEKHG6	pleckstrin homology and RhoGEF domain containing G6	3.57285	3.38302e-06	4.22469e-05
FMOD	fibromodulin	3.57238	6.37873e-05	0.000372644
EGFL7	EGF like domain multiple 7	3.56729	1.07552e-06	1.9796e-05
MUC20	mucin 20, cell surface associated	3.56667	3.01872e-06	3.91116e-05
CKMT1A	creatine kinase, mitochondrial 1A	3.56337	1.02606e-06	1.92728e-05
TRMT12	tRNA methyltransferase 12 homolog	3.55905	8.38826e-07	1.71643e-05
TMEM59L	transmembrane protein 59 like	3.55465	1.96819e-06	2.94288e-05
TNFRSF18	TNF receptor superfamily member 18	3.55399	3.9085e-06	4.65108e-05
PACSIN1	protein kinase C and casein kinase substrate in neurons 1	3.54759	1.99711e-05	0.000152961
AMD1	adenosylmethionine decarboxylase 1	3.54439	1.91767e-07	7.19351e-06
SLC52A3	solute carrier family 52 member 3	3.53325	4.30514e-05	0.000273961
HGD	homogentisate 1,2-dioxygenase	3.53015	1.54542e-05	0.000127581
NME3	NME/NM23 nucleoside diphosphate kinase 3	3.52996	2.26958e-06	3.234e-05
DUSP9	dual specificity phosphatase 9	3.52691	2.42562e-06	3.37508e-05
APCDD1	APC down-regulated 1	3.51797	9.06324e-07	1.77244e-05
GSTA4	glutathione S-transferase alpha 4	3.51217	7.92718e-06	7.75727e-05
RHOU	ras homolog family member U	3.5096	2.90719e-05	0.000204813
CCT6B	chaperonin containing TCP1 subunit 6B	3.50798	1.13947e-06	2.05024e-05
PLCB4	phospholipase C beta 4	3.50301	0.00290961	0.00771545
PDE9A	phosphodiesterase 9A	3.50279	2.67961e-06	3.56975e-05
ARG2	arginase 2	3.49655	1.46319e-08	2.1827e-06
SLC29A4	solute carrier family 29 member 4	3.49451	1.09033e-05	9.74083e-05
CYB5A	cytochrome b5 type A	3.4921	4.93325e-07	1.24358e-05
C9orf152	chromosome 9 open reading frame 152	3.48905	7.72816e-05	0.000434083
FAM174B	family with sequence similarity 174 member B	3.48755	5.10788e-06	5.61453e-05
FRMPD1	FERM and PDZ domain containing 1	3.48657	9.14423e-06	8.58795e-05
PLPP1	phospholipid phosphatase 1	3.48467	4.60372e-08	3.43588e-06
RPL22L1	ribosomal protein L22 like 1	3.48271	1.5587e-06	2.52482e-05
HIST1H3D	histone cluster 1 H3 family member d	3.47466	9.69752e-07	1.86801e-05
FAM155B	family with sequence similarity 155 member B	3.47379	5.24787e-05	0.000319682
ADSSL1	adenylosuccinate synthase like 1	3.47316	4.09108e-06	4.78124e-05
MESP1	mesoderm posterior bHLH transcription factor 1	3.47169	2.8274e-06	3.73945e-05
RPL10L	ribosomal protein L10 like	3.46974	2.6584e-06	3.54887e-05
NRARP	NOTCH regulated ankyrin repeat protein	3.46234	5.42326e-06	5.8541e-05
PIR	pirin	3.45967	3.36061e-07	9.62349e-06
RFLNB	refilin B	3.4572	7.38231e-07	1.58826e-05
NMB	neuromedin B	3.45593	8.32453e-06	8.05445e-05
MBOAT2	membrane bound O-acyltransferase domain containing 2	3.45439	6.82807e-08	4.15605e-06
IL6R	interleukin 6 receptor	3.45128	6.09775e-05	0.000359339
AS3MT	arsenite methyltransferase	3.4489	1.23447e-06	2.16091e-05
GRB7	growth factor receptor bound protein 7	3.44327	2.86217e-06	3.77772e-05
OVOL1	ovo like transcriptional repressor 1	3.44192	7.68192e-07	1.63361e-05
ZNF285	zinc finger protein 285	3.43696	5.40696e-06	5.8438e-05
TENM1	teneurin transmembrane protein 1	3.42826	0.00024367	0.00106004
SERINC2	serine incorporator 2	3.42676	6.27887e-06	6.51712e-05
PEBP4	phosphatidylethanolamine binding protein 4	3.42625	2.87997e-06	3.78134e-05
AUTS2	AUTS2, activator of transcription and developmental regulator	3.42265	0.00244299	0.00670686
ARHGEF37	Rho guanine nucleotide exchange factor 37	3.4171	0.000237519	0.0010375
EFCC1	EF-hand and coiled-coil domain containing 1	3.41708	2.18257e-06	3.16162e-05
GOLT1A	golgi transport 1A	3.41029	8.23213e-07	1.69518e-05
ID2	inhibitor of DNA binding 2, HLH protein	3.40879	2.51075e-06	3.44151e-05
PLPP5	phospholipid phosphatase 5	3.40759	1.01098e-07	5.0144e-06
GPT	glutamic--pyruvic transaminase	3.40576	1.11925e-06	2.02809e-05
ATPAF1	ATP synthase mitochondrial F1 complex assembly factor 1	3.40529	3.3948e-07	9.63539e-06
RNF144A	ring finger protein 144A	3.40052	8.75175e-06	8.36633e-05
C9orf116	chromosome 9 open reading frame 116	3.38645	1.76205e-05	0.000140756
MSMB	microseminoprotein beta	3.38615	2.39552e-05	0.000175212
OSR2	odd-skipped related transciption factor 2	3.38495	7.3738e-06	7.40787e-05
ABCG1	ATP binding cassette subfamily G member 1	3.38415	8.97762e-05	0.000486787
NEFL	neurofilament light	3.38336	7.85146e-06	7.7008e-05
HSD17B8	hydroxysteroid 17-beta dehydrogenase 8	3.37971	9.77814e-07	1.87509e-05
HIST1H4E	histone cluster 1 H4 family member e	3.37957	3.41676e-06	4.24107e-05
TMEM141	transmembrane protein 141	3.37888	3.50354e-06	4.30939e-05
TTC36	tetratricopeptide repeat domain 36	3.37842	4.7962e-06	5.34583e-05
CCDC183	coiled-coil domain containing 183	3.37669	6.46247e-06	6.68066e-05
OCLN	occludin	3.37368	1.40645e-05	0.000118317
LYNX1	Ly6/neurotoxin 1	3.37185	5.30422e-05	0.000321739
FUZ	fuzzy planar cell polarity protein	3.36929	2.57151e-06	3.48362e-05
SERINC5	serine incorporator 5	3.36286	0.000171581	0.000807784
GPR158	G protein-coupled receptor 158	3.35919	2.89295e-06	3.78711e-05
TMEM184A	transmembrane protein 184A	3.35027	9.16454e-06	8.60073e-05
GRK1	G protein-coupled receptor kinase 1	3.34831	1.62778e-05	0.000132673
CARD14	caspase recruitment domain family member 14	3.34318	2.78034e-06	3.69244e-05
RTN1	reticulon 1	3.33959	0.000190598	0.000872034
FAM43A	family with sequence similarity 43 member A	3.32949	8.08207e-05	0.000449241
STEAP4	STEAP4 metalloreductase	3.32065	0.00788713	0.0175271
DUSP2	dual specificity phosphatase 2	3.32041	2.77484e-05	0.000197879
ANO9	anoctamin 9	3.31443	5.12062e-06	5.61473e-05
CCDC96	coiled-coil domain containing 96	3.30847	3.66107e-06	4.45193e-05
KLK15	kallikrein related peptidase 15	3.30792	4.1454e-06	4.82151e-05
MCMDC2	minichromosome maintenance domain containing 2	3.30765	2.6163e-05	0.000188142
IRX2	iroquois homeobox 2	3.30733	0.000119843	0.000611805
ELL3	elongation factor for RNA polymerase II 3	3.29757	5.499e-07	1.31893e-05
LRTOMT	leucine rich transmembrane and O-methyltransferase domain containing	3.2969	4.76327e-07	1.21889e-05
SLC46A1	solute carrier family 46 member 1	3.2958	9.38351e-06	8.7328e-05
USP54	ubiquitin specific peptidase 54	3.29363	0.000503034	0.00188201
CKMT1B	creatine kinase, mitochondrial 1B	3.28805	4.32331e-05	0.000274709
C19orf48	chromosome 19 open reading frame 48	3.28602	2.06193e-07	7.25207e-06
MAGEA8	MAGE family member A8	3.27949	0.00313649	0.00822865
ADAMTS13	ADAM metallopeptidase with thrombospondin type 1 motif 13	3.27664	8.43498e-06	8.14239e-05
ZNF334	zinc finger protein 334	3.27437	2.03654e-06	3.01695e-05
PCDH1	protocadherin 1	3.27228	0.00018104	0.000839381
EXOC3L1	exocyst complex component 3 like 1	3.27218	3.33509e-06	4.19581e-05
MPZL2	myelin protein zero like 2	3.27184	6.79853e-07	1.50636e-05
KANK3	KN motif and ankyrin repeat domains 3	3.25727	2.88736e-06	3.78365e-05
THRB	thyroid hormone receptor beta	3.2554	0.000610421	0.00218586
FBXL16	F-box and leucine rich repeat protein 16	3.25464	8.82286e-06	8.40768e-05
MESP2	mesoderm posterior bHLH transcription factor 2	3.25434	3.79556e-06	4.55077e-05
OSCP1	organic solute carrier partner 1	3.25341	7.72459e-06	7.62298e-05
HID1	HID1 domain containing	3.25113	0.000234627	0.00102766
KLHDC8B	kelch domain containing 8B	3.25091	1.13871e-05	0.000100748
MYOD1	myogenic differentiation 1	3.2503	0.000177043	0.000825347
SLC34A3	solute carrier family 34 member 3	3.237	9.90487e-06	9.09589e-05
GPR143	G protein-coupled receptor 143	3.23234	1.23567e-06	2.16091e-05
RAB19	RAB19, member RAS oncogene family	3.23019	6.75994e-05	0.00038915
EMC10	ER membrane protein complex subunit 10	3.22702	1.61338e-07	6.42797e-06
LDHD	lactate dehydrogenase D	3.22662	5.18146e-06	5.64766e-05
FYB2	FYN binding protein 2	3.22581	2.54123e-06	3.46088e-05
CACNA2D2	calcium voltage-gated channel auxiliary subunit alpha2delta 2	3.21995	5.11878e-05	0.000313306
KLF15	Kruppel like factor 15	3.21955	9.55369e-05	0.000510898
PEX11G	peroxisomal biogenesis factor 11 gamma	3.21204	1.93659e-05	0.0001503
TPD52L1	tumor protein D52 like 1	3.21116	2.65794e-06	3.54887e-05
HIST1H1C	histone cluster 1 H1 family member c	3.20782	4.06939e-07	1.09218e-05
RENBP	renin binding protein	3.20767	1.92829e-05	0.000149927
NAAA	N-acylethanolamine acid amidase	3.20676	5.61307e-07	1.33848e-05
EIF4EBP3	eukaryotic translation initiation factor 4E binding protein 3	3.19816	2.93197e-06	3.81484e-05
SLCO2A1	solute carrier organic anion transporter family member 2A1	3.19066	4.90277e-05	0.000303414
LOC730183	uncharacterized LOC730183	3.19064	2.1764e-05	0.000163185
TLCD1	TLC domain containing 1	3.18768	7.10417e-07	1.54212e-05
FAM71E1	family with sequence similarity 71 member E1	3.18666	1.37396e-05	0.000115965
GSC	goosecoid homeobox	3.17541	1.43282e-06	2.39344e-05
AGT	angiotensinogen	3.1748	0.000755345	0.00258615
TEX45	testis expressed 45	3.17411	1.00856e-05	9.22226e-05
SIPA1L2	signal induced proliferation associated 1 like 2	3.16799	0.000320362	0.00131607
HNF1B	HNF1 homeobox B	3.16759	0.000653118	0.00230632
RIBC1	RIB43A domain with coiled-coils 1	3.16332	1.75287e-06	2.7324e-05
NT5M	5',3'-nucleotidase, mitochondrial	3.16282	7.61693e-05	0.000428962
KCNG1	potassium voltage-gated channel modifier subfamily G member 1	3.15768	3.48496e-05	0.000234199
ZNF471	zinc finger protein 471	3.15698	3.70672e-05	0.000244995
GLTPD2	glycolipid transfer protein domain containing 2	3.15655	3.62808e-05	0.000241414
S100P	S100 calcium binding protein P	3.15453	0.000230489	0.00101312
ARHGEF16	Rho guanine nucleotide exchange factor 16	3.14812	0.000296096	0.00123572
KCNMA1	potassium calcium-activated channel subfamily M alpha 1	3.14447	0.000247752	0.00107379
FBXO15	F-box protein 15	3.14417	6.65921e-06	6.83995e-05
EFNA1	ephrin A1	3.14122	2.43743e-06	3.38784e-05
LARGE1	LARGE xylosyl- and glucuronyltransferase 1	3.13973	5.53156e-05	0.000332079
ACP5	acid phosphatase 5, tartrate resistant	3.13223	0.000243968	0.00106097
MAFB	MAF bZIP transcription factor B	3.13106	0.000102785	0.000539999
DNALI1	dynein axonemal light intermediate chain 1	3.12175	1.87268e-06	2.87032e-05
LTC4S	leukotriene C4 synthase	3.12056	1.35724e-05	0.000115159
TUB	tubby bipartite transcription factor	3.11763	4.98e-05	0.000307008
CDH15	cadherin 15	3.11395	8.60896e-06	8.27004e-05
LRFN1	leucine rich repeat and fibronectin type III domain containing 1	3.11101	7.10186e-05	0.000404214
VASN	vasorin	3.10589	0.00211225	0.00597005
GABRA3	gamma-aminobutyric acid type A receptor alpha3 subunit	3.09908	6.77023e-05	0.000389485
TMEM134	transmembrane protein 134	3.0932	1.62297e-06	2.59296e-05
RIPK4	receptor interacting serine/threonine kinase 4	3.09147	0.000695293	0.00241404
DPYSL5	dihydropyrimidinase like 5	3.09054	1.1721e-05	0.000103186
ENHO	energy homeostasis associated	3.08494	1.25057e-05	0.000108037
TSPAN33	tetraspanin 33	3.08438	2.1889e-05	0.000163549
EMID1	EMI domain containing 1	3.07988	8.85354e-06	8.42597e-05
KCP	kielin/chordin-like protein	3.07879	0.000144603	0.000706173
ABCC4	ATP binding cassette subfamily C member 4	3.07851	0.000104066	0.000545408
LMTK3	lemur tyrosine kinase 3	3.07498	0.000162049	0.000771689
CYSRT1	cysteine rich tail 1	3.07277	8.52334e-06	8.20437e-05
HIST1H2BK	histone cluster 1 H2B family member k	3.07201	7.37284e-07	1.58826e-05
GULP1	GULP, engulfment adaptor PTB domain containing 1	3.06936	1.50258e-06	2.4682e-05
IRF5	interferon regulatory factor 5	3.06577	7.92554e-06	7.75727e-05
CHRM1	cholinergic receptor muscarinic 1	3.06375	5.99606e-05	0.000354813
TBX10	T-box 10	3.06156	3.2075e-05	0.000220638
CNFN	cornifelin	3.06003	3.91525e-05	0.000255227
GPER1	G protein-coupled estrogen receptor 1	3.05815	0.000325349	0.00133309
UGT2B28	UDP glucuronosyltransferase family 2 member B28	3.05329	3.38508e-05	0.000229288
CGN	cingulin	3.04392	0.00156514	0.00466306
LOC100652758	uncharacterized LOC100652758	3.04333	4.35661e-06	4.99776e-05
INCA1	inhibitor of CDK, cyclin A1 interacting protein 1	3.04309	6.53703e-05	0.000379817
PEG3	paternally expressed 3	3.04224	0.00837505	0.0184105
LRP3	LDL receptor related protein 3	3.0348	1.41346e-06	2.36418e-05
CDIP1	cell death inducing p53 target 1	3.03443	4.29895e-05	0.000273704
PCCA	propionyl-CoA carboxylase alpha subunit	3.02995	9.24268e-06	8.64875e-05
OGDHL	oxoglutarate dehydrogenase like	3.02991	2.45934e-05	0.000178701
REEP6	receptor accessory protein 6	3.02751	1.89534e-06	2.8878e-05
CABLES1	Cdk5 and Abl enzyme substrate 1	3.02227	4.4101e-05	0.000279256
EPB41L5	erythrocyte membrane protein band 4.1 like 5	3.01877	9.38696e-06	8.7328e-05
CYB5R2	cytochrome b5 reductase 2	3.01482	5.65689e-06	6.02326e-05
SORD	sorbitol dehydrogenase	3.00398	2.57433e-06	3.48376e-05
F12	coagulation factor XII	3.00129	5.5948e-06	5.9863e-05
TMEM9	transmembrane protein 9	2.99736	6.85654e-07	1.50879e-05
BSCL2	BSCL2, seipin lipid droplet biogenesis associated	2.99717	8.19995e-08	4.53436e-06
SLC22A31	solute carrier family 22 member 31	2.99318	0.000259864	0.00111461
PTPRN2	protein tyrosine phosphatase, receptor type N2	2.99148	4.9253e-05	0.000304661
FAM83E	family with sequence similarity 83 member E	2.98948	9.58487e-06	8.87828e-05
KRT75	keratin 75	2.98862	1.66676e-05	0.000135335
CCDC57	coiled-coil domain containing 57	2.98783	4.09214e-06	4.78124e-05
FECH	ferrochelatase	2.98317	2.34016e-06	3.30273e-05
DHDH	dihydrodiol dehydrogenase	2.97781	0.000164157	0.0007797
ACTR3C	ARP3 actin related protein 3 homolog C	2.96987	4.59572e-05	0.000288024
NME5	NME/NM23 family member 5	2.96721	3.99388e-06	4.70933e-05
KLB	klotho beta	2.96524	3.82621e-05	0.000250697
TMPRSS11E	transmembrane protease, serine 11E	2.9639	3.09573e-05	0.000214676
HLA-DQB1	major histocompatibility complex, class II, DQ beta 1	2.96262	5.8514e-06	6.20394e-05
RWDD2A	RWD domain containing 2A	2.9587	3.40605e-05	0.000230344
PNLIP	pancreatic lipase	2.95819	1.28561e-05	0.00010988
C9orf43	chromosome 9 open reading frame 43	2.95773	2.71758e-05	0.000194119
DCXR	dicarbonyl and L-xylulose reductase	2.95672	3.13794e-07	9.34029e-06
SNX22	sorting nexin 22	2.9548	1.5079e-05	0.000125128
RAP1GAP	RAP1 GTPase activating protein	2.95334	8.91743e-05	0.000484343
GNAZ	G protein subunit alpha z	2.95031	0.000311602	0.0012887
SAMD15	sterile alpha motif domain containing 15	2.94593	0.000504387	0.00188439
JAKMIP1	janus kinase and microtubule interacting protein 1	2.94421	1.05105e-05	9.50802e-05
CCDC28B	coiled-coil domain containing 28B	2.94289	2.77769e-05	0.000197972
FOXD4	forkhead box D4	2.93961	4.50211e-06	5.1249e-05
MAPK15	mitogen-activated protein kinase 15	2.9383	1.76827e-05	0.000141165
RAB6B	RAB6B, member RAS oncogene family	2.93465	2.31087e-05	0.000170087
TCTEX1D4	Tctex1 domain containing 4	2.93152	3.32653e-05	0.000226398
VWA1	von Willebrand factor A domain containing 1	2.93118	3.05954e-05	0.000212742
ANKRD24	ankyrin repeat domain 24	2.93051	6.95914e-05	0.000397726
SLIT1	slit guidance ligand 1	2.92922	0.000144466	0.000705771
ADAM2	ADAM metallopeptidase domain 2	2.92647	0.000220065	0.000977228
FGF13	fibroblast growth factor 13	2.92294	0.000130371	0.000654609
SCNN1G	sodium channel epithelial 1 gamma subunit	2.92258	0.000160124	0.00076622
MFSD6L	major facilitator superfamily domain containing 6 like	2.91695	1.37398e-05	0.000115965
FRMPD2	FERM and PDZ domain containing 2	2.91666	9.90051e-05	0.00052444
APOF	apolipoprotein F	2.91651	2.88265e-06	3.78134e-05
SLC9A2	solute carrier family 9 member A2	2.91584	0.00108296	0.00345519
TBPL1	TATA-box binding protein like 1	2.91446	4.76699e-07	1.21889e-05
BCHE	butyrylcholinesterase	2.91345	0.000424663	0.0016482
C1orf21	chromosome 1 open reading frame 21	2.9123	8.7284e-07	1.74413e-05
EFCAB12	EF-hand calcium binding domain 12	2.90922	1.68361e-05	0.000136185
GP2	glycoprotein 2	2.90884	3.34511e-05	0.00022742
PEX10	peroxisomal biogenesis factor 10	2.90768	1.15252e-06	2.06688e-05
CCDC159	coiled-coil domain containing 159	2.90448	9.19059e-06	8.60774e-05
KRT6C	keratin 6C	2.90446	4.27147e-05	0.000272495
RAB3A	RAB3A, member RAS oncogene family	2.90206	8.85977e-05	0.00048269
ARSD	arylsulfatase D	2.90194	0.000183188	0.000847744
ARHGEF5	Rho guanine nucleotide exchange factor 5	2.90069	0.00017206	0.000808958
TRAF4	TNF receptor associated factor 4	2.90036	6.51796e-07	1.46958e-05
UGT2B10	UDP glucuronosyltransferase family 2 member B10	2.89134	0.00101114	0.00327523
SMCO4	single-pass membrane protein with coiled-coil domains 4	2.89101	1.3674e-06	2.30722e-05
ZNF513	zinc finger protein 513	2.88961	3.16863e-06	4.03678e-05
PANX2	pannexin 2	2.88586	0.000123254	0.00062598
LLGL2	LLGL2, scribble cell polarity complex component	2.88486	2.84079e-05	0.000201351
CPT1C	carnitine palmitoyltransferase 1C	2.88224	8.52387e-06	8.20437e-05
CLUL1	clusterin like 1	2.88178	1.34247e-05	0.000114208
FBXO25	F-box protein 25	2.88052	5.48666e-07	1.31893e-05
SAMD13	sterile alpha motif domain containing 13	2.87736	3.922e-06	4.65351e-05
ZNF365	zinc finger protein 365	2.86621	6.43975e-05	0.000375696
TMEM266	transmembrane protein 266	2.85265	2.26371e-05	0.000167577
TAS1R1	taste 1 receptor member 1	2.85021	1.95578e-05	0.000151331
SLC51A	solute carrier family 51 alpha subunit	2.84873	8.08697e-05	0.000449263
SURF1	SURF1, cytochrome c oxidase assembly factor	2.84585	3.45497e-07	9.72683e-06
MRPL20	mitochondrial ribosomal protein L20	2.84331	2.51091e-06	3.44151e-05
HOGA1	4-hydroxy-2-oxoglutarate aldolase 1	2.83855	8.46805e-05	0.000466052
PATJ	PATJ, crumbs cell polarity complex component	2.83854	0.000460774	0.00175469
TIMM8B	translocase of inner mitochondrial membrane 8 homolog B	2.8365	5.47916e-05	0.0003297
CCDC154	coiled-coil domain containing 154	2.83366	0.000233526	0.00102319
ISM2	isthmin 2	2.83178	3.62766e-05	0.000241414
TMEM63C	transmembrane protein 63C	2.83096	0.00757028	0.0169433
TREX1	three prime repair exonuclease 1	2.82442	1.00924e-06	1.90684e-05
CRYM	crystallin mu	2.82253	0.000295934	0.00123572
TMEM210	transmembrane protein 210	2.81852	7.61143e-06	7.55132e-05
NFASC	neurofascin	2.81499	4.27098e-05	0.000272495
PHLDA3	pleckstrin homology like domain family A member 3	2.81236	0.000134	0.000666829
ZNF552	zinc finger protein 552	2.81003	1.17032e-05	0.000103118
PSD4	pleckstrin and Sec7 domain containing 4	2.80877	0.000298694	0.00124495
EVL	Enah/Vasp-like	2.80751	1.60243e-05	0.00013119
PCDHGB5	protocadherin gamma subfamily B, 5	2.80613	0.00373045	0.00948245
HOMER2	homer scaffolding protein 2	2.80554	1.32101e-06	2.25662e-05
DMAC1	distal membrane arm assembly complex 1	2.80507	6.23752e-06	6.48995e-05
PIK3R3	phosphoinositide-3-kinase regulatory subunit 3	2.80494	0.000679328	0.00237598
SLC25A10	solute carrier family 25 member 10	2.80279	3.06315e-07	9.2464e-06
TDRP	testis development related protein	2.8013	5.46925e-05	0.000329413
PTCRA	pre T-cell antigen receptor alpha	2.79921	3.54641e-05	0.000237458
MAPRE3	microtubule associated protein RP/EB family member 3	2.79534	3.04295e-05	0.000212112
PLEKHH1	pleckstrin homology, MyTH4 and FERM domain containing H1	2.79431	0.000729577	0.00251809
PCDHB5	protocadherin beta 5	2.79282	0.000424538	0.0016482
OR51E2	olfactory receptor family 51 subfamily E member 2	2.791	0.000140777	0.000691965
FZD3	frizzled class receptor 3	2.78965	3.92478e-06	4.65351e-05
TM4SF18	transmembrane 4 L six family member 18	2.78896	0.000162199	0.000772116
ARMC12	armadillo repeat containing 12	2.78579	2.15099e-05	0.000161996
SMPD2	sphingomyelin phosphodiesterase 2	2.78135	1.47028e-06	2.43071e-05
IGSF9B	immunoglobulin superfamily member 9B	2.77983	1.20687e-05	0.000105124
SPATA18	spermatogenesis associated 18	2.77012	0.00114016	0.00360167
SRMS	src-related kinase lacking C-terminal regulatory tyrosine and N-terminal myristylation sites	2.76791	6.95746e-05	0.000397726
NDUFB10	NADH:ubiquinone oxidoreductase subunit B10	2.76679	6.14498e-08	3.90267e-06
NXPH4	neurexophilin 4	2.76532	0.000216292	0.000964146
MYT1	myelin transcription factor 1	2.76428	0.000142727	0.000699083
CASZ1	castor zinc finger 1	2.75777	0.00169976	0.00500707
CDH12	cadherin 12	2.75388	0.000117811	0.000603353
FAM151A	family with sequence similarity 151 member A	2.75374	0.000129297	0.000650492
TRIM49	tripartite motif containing 49	2.75345	0.000232132	0.00101836
ZNF747	zinc finger protein 747	2.75272	7.05315e-05	0.000401976
CDK19	cyclin dependent kinase 19	2.75075	0.00053211	0.00197011
C21orf33	chromosome 21 open reading frame 33	2.74785	3.05118e-07	9.23694e-06
CSPG5	chondroitin sulfate proteoglycan 5	2.74705	3.81755e-05	0.000250337
IDH2	isocitrate dehydrogenase (NADP(+)) 2, mitochondrial	2.74625	1.88483e-07	7.1329e-06
TCTA	T-cell leukemia translocation altered	2.7438	2.33655e-05	0.000171485
KISS1R	KISS1 receptor	2.74261	2.21509e-05	0.00016493
ARHGEF35	Rho guanine nucleotide exchange factor 35	2.74204	0.000101417	0.000534603
PTK2B	protein tyrosine kinase 2 beta	2.73718	0.000232623	0.00101993
TIGD6	tigger transposable element derived 6	2.73478	7.42426e-05	0.00042014
OXLD1	oxidoreductase like domain containing 1	2.73447	4.1918e-06	4.87107e-05
FCGBP	Fc fragment of IgG binding protein	2.73351	0.00171144	0.00503581
MYCL	MYCL proto-oncogene, bHLH transcription factor	2.73278	0.000167212	0.000790989
H2AFJ	H2A histone family member J	2.73036	6.55964e-06	6.75932e-05
DERL3	derlin 3	2.72881	0.000280673	0.00118602
MAATS1	MYCBP associated and testis expressed 1	2.72792	0.000307838	0.00127477
AIF1L	allograft inflammatory factor 1 like	2.72264	4.72369e-05	0.000294903
CAMK2N1	calcium/calmodulin dependent protein kinase II inhibitor 1	2.72241	9.39846e-05	0.000504911
LIN7A	lin-7 homolog A, crumbs cell polarity complex component	2.72215	1.2552e-05	0.000108211
OXCT1	3-oxoacid CoA-transferase 1	2.72207	2.44704e-05	0.000178147
EGF	epidermal growth factor	2.72097	0.0015607	0.00465417
STARD10	StAR related lipid transfer domain containing 10	2.71966	7.56595e-06	7.52431e-05
C19orf81	chromosome 19 open reading frame 81	2.71863	6.79764e-05	0.000390362
WNT4	Wnt family member 4	2.7174	6.16456e-05	0.000362277
SOX8	SRY-box 8	2.70994	5.46408e-05	0.000329256
RAB4A	RAB4A, member RAS oncogene family	2.7086	6.68965e-07	1.49515e-05
PRRG2	proline rich and Gla domain 2	2.70646	0.00268915	0.00723708
CRACR2B	calcium release activated channel regulator 2B	2.70388	1.39159e-06	2.33674e-05
HOXC13	homeobox C13	2.70259	1.13187e-05	0.00010042
DBNDD1	dysbindin domain containing 1	2.70227	5.49898e-06	5.91026e-05
UGT2B4	UDP glucuronosyltransferase family 2 member B4	2.7018	0.00106025	0.0033963
CTXN1	cortexin 1	2.7006	0.000393401	0.00154814
OR8G5	olfactory receptor family 8 subfamily G member 5	2.69849	5.90107e-06	6.23598e-05
MAP1LC3A	microtubule associated protein 1 light chain 3 alpha	2.69767	1.56046e-05	0.000128575
BRSK2	BR serine/threonine kinase 2	2.69073	0.000213639	0.000954703
HAGHL	hydroxyacylglutathione hydrolase like	2.69053	2.02689e-05	0.000154596
KLHL13	kelch like family member 13	2.68903	0.000638084	0.0022632
HOMEZ	homeobox and leucine zipper encoding	2.68735	3.4102e-05	0.000230503
GLRX2	glutaredoxin 2	2.68667	0.000177058	0.000825347
DTNB	dystrobrevin beta	2.68655	8.22892e-07	1.69518e-05
MOGAT2	monoacylglycerol O-acyltransferase 2	2.68642	0.000261779	0.0011217
SPRYD4	SPRY domain containing 4	2.67829	1.87775e-05	0.000147267
PASK	PAS domain containing serine/threonine kinase	2.67383	7.69215e-06	7.60052e-05
TMEM25	transmembrane protein 25	2.67343	4.39014e-05	0.000278292
ARFGEF3	ARFGEF family member 3	2.6731	0.00211332	0.00597177
BCDIN3D	BCDIN3 domain containing RNA methyltransferase	2.67287	1.48417e-05	0.000123639
NWD1	NACHT and WD repeat domain containing 1	2.67068	0.00149734	0.00450502
CHD5	chromodomain helicase DNA binding protein 5	2.66934	8.15054e-06	7.94554e-05
ZNF610	zinc finger protein 610	2.66549	8.24939e-05	0.00045676
SCARA3	scavenger receptor class A member 3	2.6634	3.72016e-05	0.00024563
NINJ1	ninjurin 1	2.66318	4.38422e-06	5.0199e-05
FBXO6	F-box protein 6	2.66181	5.72157e-05	0.000340771
SSC4D	scavenger receptor cysteine rich family member with 4 domains	2.66159	0.000273164	0.00115964
HIST1H1B	histone cluster 1 H1 family member b	2.66105	0.00867853	0.0189606
SLC25A45	solute carrier family 25 member 45	2.66033	5.45057e-05	0.000328597
MMP24	matrix metallopeptidase 24	2.65834	1.64036e-05	0.000133444
C6orf226	chromosome 6 open reading frame 226	2.65807	7.55642e-05	0.000426303
EPHX1	epoxide hydrolase 1	2.65446	4.12978e-05	0.000265835
CABP4	calcium binding protein 4	2.65091	1.97426e-05	0.000152217
DUS1L	dihydrouridine synthase 1 like	2.64891	8.21065e-07	1.69518e-05
COQ5	coenzyme Q5, methyltransferase	2.64742	1.1382e-05	0.000100748
KCNK5	potassium two pore domain channel subfamily K member 5	2.64703	0.00154732	0.00462611
SERINC4	serine incorporator 4	2.64447	0.000104786	0.000548248
RAB39B	RAB39B, member RAS oncogene family	2.64308	1.85232e-05	0.000145785
METTL26	methyltransferase like 26	2.6408	3.5534e-07	9.9534e-06
ZNF726	zinc finger protein 726	2.64025	2.10734e-05	0.000159405
TESC	tescalcin	2.64001	2.00403e-05	0.000153125
CHRM3	cholinergic receptor muscarinic 3	2.63732	0.000402517	0.00158111
ZMYND12	zinc finger MYND-type containing 12	2.63698	1.5044e-05	0.000124918
ADAP2	ArfGAP with dual PH domains 2	2.63673	0.000180733	0.00083856
SLC45A2	solute carrier family 45 member 2	2.63439	6.82683e-05	0.000391513
VSTM2L	V-set and transmembrane domain containing 2 like	2.63437	0.000131908	0.00065949
TTYH2	tweety family member 2	2.63394	0.00010078	0.000532279
NPPC	natriuretic peptide C	2.63219	0.000526449	0.00195253
ALPK2	alpha kinase 2	2.62866	6.45028e-05	0.000375968
PIK3C2B	phosphatidylinositol-4-phosphate 3-kinase catalytic subunit type 2 beta	2.62504	0.00468891	0.0114361
FBXL17	F-box and leucine rich repeat protein 17	2.62413	0.000376643	0.00149642
MRPS33	mitochondrial ribosomal protein S33	2.62116	7.13659e-06	7.23757e-05
KRT19	keratin 19	2.61828	0.00117282	0.00368235
C2orf16	chromosome 2 open reading frame 16	2.61793	0.000165323	0.000784077
B3GALT6	beta-1,3-galactosyltransferase 6	2.61563	0.000217661	0.000968231
CLDN7	claudin 7	2.61172	6.16671e-07	1.42078e-05
MCRIP2	MAPK regulated corepressor interacting protein 2	2.61152	4.4981e-05	0.000283554
C16orf91	chromosome 16 open reading frame 91	2.60984	2.02269e-05	0.000154367
PPL	periplakin	2.60691	0.00148207	0.00446955
EFNA5	ephrin A5	2.60391	0.000517982	0.00192782
PPM1H	protein phosphatase, Mg2+/Mn2+ dependent 1H	2.60311	0.000442227	0.00170166
AQP3	aquaporin 3 (Gill blood group)	2.6007	0.000497317	0.00186389
FBXO44	F-box protein 44	2.60005	3.04918e-05	0.000212251
ZNF582	zinc finger protein 582	2.59885	2.33323e-05	0.00017134
RNF224	ring finger protein 224	2.59776	3.3161e-05	0.000225928
ABCD1	ATP binding cassette subfamily D member 1	2.59747	0.000491112	0.0018444
HIST1H2AC	histone cluster 1 H2A family member c	2.59182	2.98395e-05	0.000208958
CCDC87	coiled-coil domain containing 87	2.59083	0.000594135	0.00213745
PTGFRN	prostaglandin F2 receptor inhibitor	2.58984	0.000674915	0.0023631
GRID2IP	Grid2 interacting protein	2.58905	6.3025e-05	0.000369031
TMEM187	transmembrane protein 187	2.58751	5.06067e-05	0.00031049
ISX	intestine specific homeobox	2.58666	5.2477e-05	0.000319682
ZNF879	zinc finger protein 879	2.58658	9.29469e-06	8.69108e-05
HIST1H3H	histone cluster 1 H3 family member h	2.58515	0.000126869	0.000639536
C1orf115	chromosome 1 open reading frame 115	2.58504	8.15944e-06	7.94772e-05
ALPK3	alpha kinase 3	2.585	0.00108323	0.0034552
MIEN1	migration and invasion enhancer 1	2.58383	2.61039e-06	3.51e-05
CYB5RL	cytochrome b5 reductase like	2.58047	9.42196e-06	8.74633e-05
ARVCF	armadillo repeat gene deleted in velocardiofacial syndrome	2.58031	8.68907e-05	0.00047536
HIST2H2BE	histone cluster 2 H2B family member e	2.57872	0.000145152	0.000708312
AGTRAP	angiotensin II receptor associated protein	2.57421	1.54857e-06	2.5168e-05
HES4	hes family bHLH transcription factor 4	2.57407	3.58673e-05	0.000239532
DAPK2	death associated protein kinase 2	2.56899	1.60409e-05	0.000131223
LMF1	lipase maturation factor 1	2.56845	1.84355e-05	0.000145544
TYRP1	tyrosinase related protein 1	2.56654	0.000740947	0.00255047
NDUFA7	NADH:ubiquinone oxidoreductase subunit A7	2.56491	2.98811e-06	3.88001e-05
GCNT1	glucosaminyl (N-acetyl) transferase 1, core 2	2.56461	0.000501081	0.0018769
WNT10B	Wnt family member 10B	2.56435	0.000416471	0.00162467
LYPLAL1	lysophospholipase like 1	2.56045	2.40733e-06	3.36057e-05
C1QTNF9B	C1q and TNF related 9B	2.56041	0.000184911	0.000853316
HHLA3	HERV-H LTR-associating 3	2.5517	5.72745e-05	0.000340963
EPHB6	EPH receptor B6	2.55066	3.52307e-05	0.000236383
ADA	adenosine deaminase	2.54912	0.000159598	0.000764557
NRG4	neuregulin 4	2.54896	4.56745e-05	0.000287012
MAPK8IP1	mitogen-activated protein kinase 8 interacting protein 1	2.54748	2.61287e-06	3.51e-05
NAIP	NLR family apoptosis inhibitory protein	2.54543	3.14671e-05	0.000217272
SORBS2	sorbin and SH3 domain containing 2	2.54476	0.000554382	0.00203343
SAT1	spermidine/spermine N1-acetyltransferase 1	2.54449	9.51231e-05	0.000509321
D2HGDH	D-2-hydroxyglutarate dehydrogenase	2.54413	6.5402e-05	0.000379829
IL20RA	interleukin 20 receptor subunit alpha	2.54076	3.48205e-05	0.000234126
MAGIX	MAGI family member, X-linked	2.53928	3.6843e-05	0.000243923
PLXNB1	plexin B1	2.53869	0.00132785	0.00407925
IFT57	intraflagellar transport 57	2.53353	1.59165e-06	2.5556e-05
SOBP	sine oculis binding protein homolog	2.53247	0.000115904	0.000595729
ELFN1	extracellular leucine rich repeat and fibronectin type III domain containing 1	2.531	0.000147152	0.000715623
EPHA7	EPH receptor A7	2.52932	0.00759122	0.0169783
ICA1	islet cell autoantigen 1	2.52764	1.11118e-06	2.01917e-05
STAB1	stabilin 1	2.52476	9.18569e-05	0.000495348
LRRC7	leucine rich repeat containing 7	2.52407	0.000890704	0.00296109
B3GAT3	beta-1,3-glucuronyltransferase 3	2.5224	2.55175e-06	3.46784e-05
C2	complement C2	2.51961	5.26231e-05	0.000320409
LRRC73	leucine rich repeat containing 73	2.51769	7.30178e-05	0.00041394
CNTD1	cyclin N-terminal domain containing 1	2.51734	1.52437e-05	0.000126236
FAM166B	family with sequence similarity 166 member B	2.51706	5.42358e-05	0.000327277
NLGN4X	neuroligin 4, X-linked	2.51638	0.0127946	0.0263091
PCDH11Y	protocadherin 11 Y-linked	2.51497	0.0110004	0.0231503
THRA	thyroid hormone receptor, alpha	2.511	3.80522e-05	0.000249832
PCBD1	pterin-4 alpha-carbinolamine dehydratase 1	2.51015	1.22344e-05	0.0001063
ARSG	arylsulfatase G	2.50998	2.14609e-05	0.000161859
ELF5	E74 like ETS transcription factor 5	2.50852	0.000316003	0.00130283
CYP2C9	cytochrome P450 family 2 subfamily C member 9	2.50759	2.91546e-05	0.000205134
UFSP1	UFM1 specific peptidase 1 (inactive)	2.50421	0.000250183	0.00108124
SLC15A2	solute carrier family 15 member 2	2.50395	0.000250229	0.00108124
GCSH	glycine cleavage system protein H	2.50358	7.41931e-06	7.44194e-05
SLC43A2	solute carrier family 43 member 2	2.5022	0.00119974	0.00375493
HEBP2	heme binding protein 2	2.50056	2.13045e-06	3.11294e-05
GP1BB	glycoprotein Ib platelet beta subunit	2.49999	1.08563e-05	9.70558e-05
CCDC189	coiled-coil domain containing 189	2.49968	8.32591e-05	0.000459411
MRPS21	mitochondrial ribosomal protein S21	2.49857	2.00006e-05	0.000153095
DUSP27	dual specificity phosphatase 27 (putative)	2.49807	0.000170449	0.000803932
THTPA	thiamine triphosphatase	2.49575	3.45584e-05	0.000232607
NECAB3	N-terminal EF-hand calcium binding protein 3	2.49575	1.07887e-06	1.98293e-05
TKFC	triokinase and FMN cyclase	2.49496	1.58084e-05	0.00012992
RASAL3	RAS protein activator like 3	2.4946	3.76354e-05	0.000247871
BCAS1	breast carcinoma amplified sequence 1	2.49193	0.00293112	0.0077635
ECHDC2	enoyl-CoA hydratase domain containing 2	2.49002	4.5609e-06	5.15659e-05
PIGP	phosphatidylinositol glycan anchor biosynthesis class P	2.48959	5.16199e-06	5.63464e-05
MAP2	microtubule associated protein 2	2.48855	0.000636834	0.00226001
TMC3	transmembrane channel like 3	2.48608	4.50554e-05	0.000283758
BEND4	BEN domain containing 4	2.48589	0.000893262	0.00296729
PLA2G4D	phospholipase A2 group IVD	2.48344	2.3316e-05	0.000171318
RGS11	regulator of G protein signaling 11	2.48324	0.000399219	0.00156911
ARHGEF26	Rho guanine nucleotide exchange factor 26	2.48137	2.73584e-05	0.000195315
FASTK	Fas activated serine/threonine kinase	2.4792	8.21392e-07	1.69518e-05
DECR2	2,4-dienoyl-CoA reductase 2	2.47895	3.10187e-06	3.98736e-05
DUSP16	dual specificity phosphatase 16	2.47797	0.000165891	0.000785839
ASS1	argininosuccinate synthase 1	2.4765	9.66844e-05	0.00051553
FBXW9	F-box and WD repeat domain containing 9	2.47589	0.000150685	0.000730036
SRSF12	serine and arginine rich splicing factor 12	2.47563	7.91418e-05	0.000442787
FBXO16	F-box protein 16	2.47379	0.000531089	0.00196747
KIAA1522	KIAA1522	2.47352	0.00442351	0.0109007
CKMT2	creatine kinase, mitochondrial 2	2.47297	0.00242409	0.00666638
JMJD8	jumonji domain containing 8	2.47052	3.68328e-06	4.46624e-05
CYB561	cytochrome b561	2.4588	5.4113e-05	0.000326832
METRN	meteorin, glial cell differentiation regulator	2.45722	0.000443171	0.00170376
GLDC	glycine decarboxylase	2.45462	0.000460342	0.00175454
CTPS2	CTP synthase 2	2.45417	5.62256e-05	0.000336907
RDM1	RAD52 motif containing 1	2.45233	1.8488e-05	0.0001456
LPCAT3	lysophosphatidylcholine acyltransferase 3	2.45195	1.98531e-05	0.000152495
MRPL41	mitochondrial ribosomal protein L41	2.44788	9.0368e-06	8.51823e-05
SMIM19	small integral membrane protein 19	2.44651	2.0826e-05	0.000158187
HSBP1L1	heat shock factor binding protein 1 like 1	2.44642	2.05847e-05	0.000156631
HMOX1	heme oxygenase 1	2.44544	0.00151277	0.00454291
C7orf50	chromosome 7 open reading frame 50	2.44537	5.95976e-06	6.28288e-05
LGI2	leucine rich repeat LGI family member 2	2.4453	1.71757e-05	0.000138235
MAP7D2	MAP7 domain containing 2	2.44335	5.39799e-05	0.000326193
PLA2G6	phospholipase A2 group VI	2.44315	0.00027534	0.00116733
CCDC24	coiled-coil domain containing 24	2.44098	1.26623e-05	0.000108586
NPIPA5	nuclear pore complex interacting protein family member A5	2.44092	0.000142061	0.000697206
SHROOM2	shroom family member 2	2.43904	0.00669387	0.0153325
CENPS-CORT	CENPS-CORT readthrough	2.43806	0.000290087	0.00121539
SV2C	synaptic vesicle glycoprotein 2C	2.43779	1.35646e-05	0.000115159
SLC16A14	solute carrier family 16 member 14	2.43778	0.000283205	0.00119397
AP1M2	adaptor related protein complex 1 mu 2 subunit	2.43726	1.71814e-06	2.69792e-05
KCNJ11	potassium voltage-gated channel subfamily J member 11	2.43701	0.00036296	0.00145014
ADH1C	alcohol dehydrogenase 1C (class I), gamma polypeptide	2.43339	0.000192408	0.000878852
HOOK2	hook microtubule tethering protein 2	2.43279	9.01407e-06	8.51521e-05
TLE2	transducin like enhancer of split 2	2.43223	0.000149072	0.000723553
AIDA	axin interactor, dorsalization associated	2.43221	3.81171e-06	4.55426e-05
CYP39A1	cytochrome P450 family 39 subfamily A member 1	2.432	0.0005317	0.00196916
SLCO5A1	solute carrier organic anion transporter family member 5A1	2.43098	3.66013e-05	0.000242754
COX17	COX17, cytochrome c oxidase copper chaperone	2.42921	4.35696e-05	0.000276573
DGKB	diacylglycerol kinase beta	2.42835	2.36486e-05	0.00017342
LAGE3	L antigen family member 3	2.42633	6.74013e-05	0.00038845
GGCT	gamma-glutamylcyclotransferase	2.42597	7.02516e-06	7.15059e-05
FABP6	fatty acid binding protein 6	2.4232	0.00253628	0.00690386
TMPRSS4	transmembrane protease, serine 4	2.42161	0.000461817	0.0017562
SLC26A1	solute carrier family 26 member 1	2.42006	0.0017055	0.00502176
SMOC2	SPARC related modular calcium binding 2	2.41734	0.000599008	0.00215197
ZNF433	zinc finger protein 433	2.41567	0.000543623	0.00200291
NEK8	NIMA related kinase 8	2.41409	4.48379e-05	0.000282944
PLA2G12A	phospholipase A2 group XIIA	2.41406	5.2849e-05	0.000321023
HIST1H4H	histone cluster 1 H4 family member h	2.41351	1.4756e-05	0.000123005
ZNF561-AS1	ZNF561 antisense RNA 1 (head to head)	2.41176	3.43604e-05	0.000231639
DSC2	desmocollin 2	2.41138	0.00250256	0.00683675
F11R	F11 receptor	2.40944	0.000195795	0.000889782
C8orf82	chromosome 8 open reading frame 82	2.40816	2.25823e-06	3.22813e-05
ABCC8	ATP binding cassette subfamily C member 8	2.40726	0.000257133	0.00110585
KIAA1211L	KIAA1211 like	2.40643	0.000187469	0.000861404
SMUG1	single-strand-selective monofunctional uracil-DNA glycosylase 1	2.40319	5.28425e-05	0.000321023
ERVMER34-1	endogenous retrovirus group MER34 member 1, envelope	2.40213	0.000661998	0.00233126
GEMIN8	gem nuclear organelle associated protein 8	2.40085	0.000335055	0.00136198
IYD	iodotyrosine deiodinase	2.39701	0.00021637	0.000964156
FBXL22	F-box and leucine rich repeat protein 22	2.39401	0.000450151	0.0017229
ZNHIT2	zinc finger HIT-type containing 2	2.39019	3.79172e-06	4.55077e-05
GNG7	G protein subunit gamma 7	2.38949	2.50698e-05	0.000181297
BVES	blood vessel epicardial substance	2.38548	0.00148101	0.00446739
MRPS26	mitochondrial ribosomal protein S26	2.38447	1.80047e-06	2.77957e-05
IDH1	isocitrate dehydrogenase (NADP(+)) 1, cytosolic	2.38232	0.000189332	0.000867396
RLN2	relaxin 2	2.38165	0.00197069	0.00563171
SLC44A3	solute carrier family 44 member 3	2.38138	0.000226648	0.00100092
APRT	adenine phosphoribosyltransferase	2.37612	1.92255e-06	2.90854e-05
SLC5A1	solute carrier family 5 member 1	2.37471	0.0128298	0.0263645
TTC16	tetratricopeptide repeat domain 16	2.37436	0.000136396	0.000675087
ZNF396	zinc finger protein 396	2.37139	0.000201827	0.000911703
WDR90	WD repeat domain 90	2.36954	0.000100028	0.000528527
SLC16A9	solute carrier family 16 member 9	2.36766	0.00106612	0.00341077
INPP5J	inositol polyphosphate-5-phosphatase J	2.36666	0.00431351	0.0106727
FKBP1B	FK506 binding protein 1B	2.36526	0.000288134	0.00121037
HOXC6	homeobox C6	2.36234	0.000795968	0.00270073
SPTBN2	spectrin beta, non-erythrocytic 2	2.36221	0.00257784	0.00699518
MAP2K6	mitogen-activated protein kinase kinase 6	2.36173	0.000554477	0.00203343
MPPE1	metallophosphoesterase 1	2.36119	9.6082e-06	8.88707e-05
RPS6KL1	ribosomal protein S6 kinase like 1	2.3605	0.000646235	0.00228642
PIGX	phosphatidylinositol glycan anchor biosynthesis class X	2.36008	1.58548e-05	0.000130135
DMBX1	diencephalon/mesencephalon homeobox 1	2.35951	0.000214435	0.000956865
CACFD1	calcium channel flower domain containing 1	2.35914	0.000381404	0.00151206
CRISP3	cysteine rich secretory protein 3	2.35709	3.04738e-05	0.000212241
EPHA6	EPH receptor A6	2.35439	0.00366876	0.00935717
OMA1	OMA1 zinc metallopeptidase	2.35407	9.83594e-06	9.04554e-05
GTF3C6	general transcription factor IIIC subunit 6	2.35315	3.9592e-06	4.68999e-05
REXO5	RNA exonuclease 5	2.35271	7.16786e-05	0.000407608
RASSF3	Ras association domain family member 3	2.34909	0.000208754	0.000939357
LCA5L	LCA5L, lebercilin like	2.34887	5.86829e-05	0.000348055
CITED1	Cbp/p300 interacting transactivator with Glu/Asp rich carboxy-terminal domain 1	2.34821	0.00014275	0.000699083
PRSS36	protease, serine 36	2.34685	0.000124863	0.00063265
AGBL5	ATP/GTP binding protein like 5	2.3467	3.14995e-06	4.02497e-05
DPH5	diphthamide biosynthesis 5	2.34661	2.1835e-05	0.000163527
SETMAR	SET domain and mariner transposase fusion gene	2.34536	5.45315e-06	5.87392e-05
DIO1	iodothyronine deiodinase 1	2.34464	0.00184537	0.00535012
HOXC9	homeobox C9	2.34142	0.000104087	0.000545408
GNA14	G protein subunit alpha 14	2.33998	8.88008e-05	0.000482795
SMIM4	small integral membrane protein 4	2.33997	9.97203e-05	0.000527116
PNMA3	paraneoplastic Ma antigen 3	2.3396	0.000119712	0.000611622
TAF12	TATA-box binding protein associated factor 12	2.33641	0.000111091	0.000574904
HLA-DMA	major histocompatibility complex, class II, DM alpha	2.33374	0.000326918	0.00133738
RASD1	ras related dexamethasone induced 1	2.33192	0.00251368	0.00685545
RAPGEF5	Rap guanine nucleotide exchange factor 5	2.3312	0.00088984	0.00295975
ODC1	ornithine decarboxylase 1	2.32994	1.45525e-06	2.41652e-05
COBLL1	cordon-bleu WH2 repeat protein like 1	2.32941	0.00189804	0.00546575
ASPHD1	aspartate beta-hydroxylase domain containing 1	2.32909	1.69151e-05	0.000136637
PLEKHD1	pleckstrin homology and coiled-coil domain containing D1	2.32895	6.14467e-05	0.00036144
TMEM54	transmembrane protein 54	2.32753	1.68049e-05	0.000136019
TP53INP1	tumor protein p53 inducible nuclear protein 1	2.32289	0.00409652	0.0102285
CAPS	calcyphosine	2.32167	9.4562e-05	0.000507116
STAG3	stromal antigen 3	2.31908	0.000210771	0.00094578
SECTM1	secreted and transmembrane 1	2.3187	6.66631e-05	0.000384917
TMEM205	transmembrane protein 205	2.31868	1.98628e-05	0.000152495
RINL	Ras and Rab interactor like	2.31716	0.000107114	0.000559278
CNTNAP2	contactin associated protein like 2	2.31604	0.000194736	0.000885911
FBF1	Fas binding factor 1	2.31409	0.00349599	0.00897719
NKD2	naked cuticle homolog 2	2.31356	3.55347e-05	0.000237806
SYCE2	synaptonemal complex central element protein 2	2.31244	0.000330117	0.00134703
UQCRH	ubiquinol-cytochrome c reductase hinge protein	2.30862	5.23e-05	0.000319188
ECH1	enoyl-CoA hydratase 1	2.30818	2.17882e-07	7.45678e-06
RPS6KA2	ribosomal protein S6 kinase A2	2.30681	0.00087145	0.00291445
COX7B2	cytochrome c oxidase subunit 7B2	2.3068	0.00128203	0.00396892
MDH1B	malate dehydrogenase 1B	2.30636	9.70497e-05	0.000516892
C16orf89	chromosome 16 open reading frame 89	2.30626	0.000105193	0.000549705
CENPBD1	CENPB DNA-binding domain containing 1	2.30459	9.64251e-05	0.000514575
NUDT16L1	nudix hydrolase 16 like 1	2.30309	2.1091e-05	0.000159444
SERPINB5	serpin family B member 5	2.29714	0.000402862	0.00158198
FGGY	FGGY carbohydrate kinase domain containing	2.29644	2.23752e-05	0.00016631
PICK1	protein interacting with PRKCA 1	2.29626	6.41473e-05	0.000374407
NDUFB9	NADH:ubiquinone oxidoreductase subunit B9	2.29463	3.7948e-06	4.55077e-05
RAB40B	RAB40B, member RAS oncogene family	2.29441	7.57426e-05	0.000427122
BARX2	BARX homeobox 2	2.29385	0.000347492	0.00139836
PPFIA3	PTPRF interacting protein alpha 3	2.292	0.000300177	0.00124991
SEL1L3	SEL1L family member 3	2.2916	0.000332811	0.00135515
DQX1	DEAQ-box RNA dependent ATPase 1	2.2867	0.000504582	0.00188451
ENDOG	endonuclease G	2.28591	8.91704e-06	8.46756e-05
TSACC	TSSK6 activating cochaperone	2.28263	0.00104027	0.0033456
HYPK	huntingtin interacting protein K	2.27987	2.56022e-06	3.47567e-05
HS6ST1	heparan sulfate 6-O-sulfotransferase 1	2.27669	0.000520225	0.00193448
SMIM14	small integral membrane protein 14	2.2757	6.66982e-05	0.000384917
KLHL17	kelch like family member 17	2.27437	0.000899516	0.00298057
PIGZ	phosphatidylinositol glycan anchor biosynthesis class Z	2.27397	0.000183673	0.000849132
MAGEC1	MAGE family member C1	2.27042	0.0237873	0.0441056
DHCR24	24-dehydrocholesterol reductase	2.26717	0.00231164	0.00642184
NDUFV2	NADH:ubiquinone oxidoreductase core subunit V2	2.26704	7.10023e-07	1.54212e-05
TBXAS1	thromboxane A synthase 1	2.26599	0.0104949	0.022236
NDUFAF8	NADH:ubiquinone oxidoreductase complex assembly factor 8	2.26451	0.000406486	0.00159092
GNG4	G protein subunit gamma 4	2.25891	4.48684e-05	0.000282997
FUK	fucokinase	2.257	0.000253823	0.00109382
A1BG	alpha-1-B glycoprotein	2.25674	0.000760464	0.00260229
MGST2	microsomal glutathione S-transferase 2	2.25593	4.61167e-06	5.20344e-05
EBPL	emopamil binding protein like	2.25552	7.47383e-06	7.47325e-05
ACSL6	acyl-CoA synthetase long chain family member 6	2.25389	0.000187329	0.0008614
TCTEX1D2	Tctex1 domain containing 2	2.25369	0.000270273	0.00115041
C10orf35	chromosome 10 open reading frame 35	2.25207	0.000876163	0.00292672
SDSL	serine dehydratase like	2.25151	5.61069e-06	5.99829e-05
ALOX15B	arachidonate 15-lipoxygenase, type B	2.25147	0.000131585	0.000658389
SORL1	sortilin related receptor 1	2.2512	0.00578742	0.0136108
ADAM11	ADAM metallopeptidase domain 11	2.25062	0.000475945	0.00179903
SRGAP3	SLIT-ROBO Rho GTPase activating protein 3	2.25023	0.000728568	0.00251596
C1RL	complement C1r subcomponent like	2.24927	0.0013432	0.00411753
XKR5	XK related 5	2.24891	8.13873e-05	0.000451608
AK7	adenylate kinase 7	2.24798	4.44529e-05	0.000281068
TTLL6	tubulin tyrosine ligase like 6	2.24796	0.000113088	0.000582421
ARHGAP44	Rho GTPase activating protein 44	2.24746	0.00465108	0.0113547
FAM162A	family with sequence similarity 162 member A	2.24735	1.87681e-06	2.87322e-05
HERC3	HECT and RLD domain containing E3 ubiquitin protein ligase 3	2.247	0.00349338	0.00897228
HCST	hematopoietic cell signal transducer	2.24325	0.000931466	0.00306627
CACNA1H	calcium voltage-gated channel subunit alpha1 H	2.24172	0.00406105	0.010151
RALYL	RALY RNA binding protein like	2.24149	0.000423727	0.00164627
FAM3B	family with sequence similarity 3 member B	2.23649	0.000132612	0.000661759
AKR1A1	aldo-keto reductase family 1 member A1	2.2363	3.32674e-07	9.58164e-06
ATP6V1F	ATPase H+ transporting V1 subunit F	2.23624	5.1643e-06	5.63464e-05
ZNF135	zinc finger protein 135	2.23509	9.03129e-05	0.000488992
SLC13A3	solute carrier family 13 member 3	2.23487	0.000340166	0.00137622
B3GALT4	beta-1,3-galactosyltransferase 4	2.23478	4.04992e-05	0.000262142
C21orf58	chromosome 21 open reading frame 58	2.23433	0.00181471	0.00527553
CD27	CD27 molecule	2.23355	6.46077e-05	0.000376067
ACER2	alkaline ceramidase 2	2.23354	0.00567032	0.0133879
SSPO	SCO-spondin	2.23278	0.00549676	0.0130323
MST1	macrophage stimulating 1	2.23265	0.000685846	0.00239095
ALDH4A1	aldehyde dehydrogenase 4 family member A1	2.23258	0.00116009	0.003654
AADAT	aminoadipate aminotransferase	2.23121	6.3404e-05	0.000370574
GK5	glycerol kinase 5 (putative)	2.23115	0.000385511	0.00152494
ZNF599	zinc finger protein 599	2.23086	0.000132419	0.000661272
KIF12	kinesin family member 12	2.23025	5.09217e-05	0.000311825
SNRNP25	small nuclear ribonucleoprotein U11/U12 subunit 25	2.23016	8.08181e-05	0.000449241
DCAF6	DDB1 and CUL4 associated factor 6	2.22892	1.66877e-06	2.64304e-05
NIPSNAP3A	nipsnap homolog 3A	2.22485	0.000145741	0.000710107
TPD52	tumor protein D52	2.2234	5.27966e-05	0.000321008
NLRX1	NLR family member X1	2.2165	5.49536e-05	0.000330381
NAT1	N-acetyltransferase 1	2.21556	0.000348039	0.00140012
KCNQ2	potassium voltage-gated channel subfamily Q member 2	2.2151	6.27591e-05	0.000367978
KDM6A	lysine demethylase 6A	2.21452	0.000393353	0.00154814
RLN1	relaxin 1	2.21434	0.0172642	0.0337369
ZNF814	zinc finger protein 814	2.21257	0.00240034	0.00661951
ENDOD1	endonuclease domain containing 1	2.21236	0.000669268	0.00235105
ZNF783	zinc finger family member 783	2.21212	0.00116333	0.00366331
ST7	suppression of tumorigenicity 7	2.21191	1.24851e-06	2.1792e-05
SSTR5	somatostatin receptor 5	2.21152	0.000553607	0.00203211
PIGH	phosphatidylinositol glycan anchor biosynthesis class H	2.21126	6.79725e-05	0.000390362
VSIG10L	V-set and immunoglobulin domain containing 10 like	2.21014	0.000315208	0.00130109
NIPSNAP1	nipsnap homolog 1	2.20969	2.096e-05	0.000158917
KLHL1	kelch like family member 1	2.20965	0.0108352	0.0228439
TLE6	transducin like enhancer of split 6	2.20874	0.00065071	0.00229908
ENPP3	ectonucleotide pyrophosphatase/phosphodiesterase 3	2.20835	0.000483992	0.00182193
MLST8	MTOR associated protein, LST8 homolog	2.205	1.88446e-06	2.875e-05
CADM1	cell adhesion molecule 1	2.20354	0.000988878	0.00321661
COX14	COX14, cytochrome c oxidase assembly factor	2.2029	5.18264e-05	0.000316912
C2orf76	chromosome 2 open reading frame 76	2.20271	2.60381e-05	0.000187454
PPP3CA	protein phosphatase 3 catalytic subunit alpha	2.20248	0.00115359	0.00363802
SLC26A11	solute carrier family 26 member 11	2.20179	0.00156015	0.00465417
ZNF233	zinc finger protein 233	2.2015	0.00421007	0.0104652
HIST1H2BF	histone cluster 1 H2B family member f	2.19963	0.00117055	0.00367794
HLF	HLF, PAR bZIP transcription factor	2.19908	5.53163e-05	0.000332079
FBLN2	fibulin 2	2.19856	4.15095e-05	0.00026693
HINT2	histidine triad nucleotide binding protein 2	2.19706	7.62254e-06	7.55132e-05
FKBP5	FK506 binding protein 5	2.19687	0.00592689	0.0138803
CYB561A3	cytochrome b561 family member A3	2.1954	1.63922e-05	0.000133436
PYCR3	pyrroline-5-carboxylate reductase 3	2.19534	0.000318507	0.00131049
CCDC110	coiled-coil domain containing 110	2.19532	0.00290875	0.00771477
CADM4	cell adhesion molecule 4	2.19414	5.26824e-05	0.000320618
DPM3	dolichyl-phosphate mannosyltransferase subunit 3	2.19281	0.00018889	0.000866382
ENOX1	ecto-NOX disulfide-thiol exchanger 1	2.19178	7.71912e-05	0.000433955
GSR	glutathione-disulfide reductase	2.18865	5.3674e-05	0.000324957
MDGA1	MAM domain containing glycosylphosphatidylinositol anchor 1	2.18809	0.00260386	0.00705042
RYR2	ryanodine receptor 2	2.18747	0.00723887	0.0163528
NAA11	N(alpha)-acetyltransferase 11, NatA catalytic subunit	2.18707	0.00288393	0.00766003
HSD17B4	hydroxysteroid 17-beta dehydrogenase 4	2.18606	1.77412e-05	0.000141455
NAPRT	nicotinate phosphoribosyltransferase	2.18463	3.4099e-06	4.24107e-05
CERS1	ceramide synthase 1	2.18264	9.5846e-05	0.000512124
RELN	reelin	2.18078	0.0024394	0.00669843
NMRAL1	NmrA like redox sensor 1	2.17925	5.90059e-07	1.39152e-05
ZMYND10	zinc finger MYND-type containing 10	2.17541	0.000198559	0.000899413
TRAF3IP3	TRAF3 interacting protein 3	2.17527	0.000868082	0.0029047
ATP5I	ATP synthase, H+ transporting, mitochondrial Fo complex subunit E	2.17526	9.73083e-05	0.000517566
NDUFB2	NADH:ubiquinone oxidoreductase subunit B2	2.17327	6.45986e-05	0.000376067
DEPTOR	DEP domain containing MTOR interacting protein	2.17234	0.000622484	0.00221994
TUSC1	tumor suppressor candidate 1	2.17206	6.76136e-05	0.00038915
MMAA	methylmalonic aciduria (cobalamin deficiency) cblA type	2.16971	0.000858993	0.00288331
HTR3A	5-hydroxytryptamine receptor 3A	2.1692	4.73568e-05	0.000295353
MTHFD2L	methylenetetrahydrofolate dehydrogenase (NADP+ dependent) 2 like	2.16777	0.00044081	0.00169774
SWI5	SWI5 homologous recombination repair protein	2.16764	6.8777e-06	7.00826e-05
C21orf2	chromosome 21 open reading frame 2	2.16355	8.44459e-05	0.000465159
STK39	serine/threonine kinase 39	2.1602	0.000685188	0.00239052
LYRM9	LYR motif containing 9	2.1594	4.45472e-05	0.000281525
HBQ1	hemoglobin subunit theta 1	2.15846	0.00298809	0.00789418
PCCB	propionyl-CoA carboxylase beta subunit	2.15821	3.48777e-06	4.30651e-05
NECTIN4	nectin cell adhesion molecule 4	2.15523	0.00214365	0.00604416
DNAJC22	DnaJ heat shock protein family (Hsp40) member C22	2.15361	2.68017e-05	0.000192089
GAMT	guanidinoacetate N-methyltransferase	2.15341	9.44455e-06	8.76096e-05
ACADS	acyl-CoA dehydrogenase, C-2 to C-3 short chain	2.15321	1.43621e-05	0.000120111
C19orf24	chromosome 19 open reading frame 24	2.15257	5.07664e-05	0.000311172
FRK	fyn related Src family tyrosine kinase	2.15252	0.00194951	0.00558514
FFAR2	free fatty acid receptor 2	2.15106	0.000284517	0.00119753
ATG9B	autophagy related 9B	2.15066	0.00212946	0.00601073
NDUFB1	NADH:ubiquinone oxidoreductase subunit B1	2.14944	8.4758e-05	0.000466278
C11orf65	chromosome 11 open reading frame 65	2.14886	0.00011273	0.000581042
GTF2IRD2	GTF2I repeat domain containing 2	2.14801	0.000203207	0.000916323
BAIAP2L1	BAI1 associated protein 2 like 1	2.14657	0.000185031	0.000853564
ZNF429	zinc finger protein 429	2.1444	0.000272093	0.00115624
GDF9	growth differentiation factor 9	2.14421	0.00197274	0.00563408
RAB15	RAB15, member RAS oncogene family	2.14202	0.0038116	0.00964667
SERF2	small EDRK-rich factor 2	2.14034	3.78141e-06	4.54656e-05
HIST1H2AL	histone cluster 1 H2A family member l	2.13835	0.000136323	0.000674984
CCDC113	coiled-coil domain containing 113	2.13475	0.00042706	0.00165621
RFPL2	ret finger protein like 2	2.13275	0.000139736	0.00068868
ASIC1	acid sensing ion channel subunit 1	2.1325	0.00527034	0.0125839
PRRG4	proline rich and Gla domain 4	2.13186	0.00133499	0.00409628
TARSL2	threonyl-tRNA synthetase like 2	2.13161	7.41372e-05	0.000419729
RHBDL2	rhomboid like 2	2.12979	0.000625167	0.00222538
GPR160	G protein-coupled receptor 160	2.12836	3.29657e-05	0.000224956
PEX7	peroxisomal biogenesis factor 7	2.1283	3.62569e-05	0.000241414
GLOD5	glyoxalase domain containing 5	2.12814	0.000556374	0.00203935
DCTPP1	dCTP pyrophosphatase 1	2.12804	5.26228e-06	5.71633e-05
C16orf45	chromosome 16 open reading frame 45	2.12792	0.00083408	0.00281072
LIPT2	lipoyl(octanoyl) transferase 2 (putative)	2.12792	0.000423891	0.00164641
DPH6	diphthamine biosynthesis 6	2.12677	0.000138935	0.000685535
ZNF132	zinc finger protein 132	2.12571	0.00188094	0.00543233
IL17RB	interleukin 17 receptor B	2.1246	0.000379297	0.00150557
CBWD1	COBW domain containing 1	2.12454	1.04698e-05	9.49238e-05
CMTM4	CKLF like MARVEL transmembrane domain containing 4	2.12339	0.000821835	0.00277602
DIRAS1	DIRAS family GTPase 1	2.12258	0.000564333	0.00206087
CPNE4	copine 4	2.12186	0.00570399	0.013454
AK8	adenylate kinase 8	2.12185	0.00059007	0.00212624
TYMSOS	TYMS opposite strand	2.12004	0.00163875	0.00485307
CYB5D1	cytochrome b5 domain containing 1	2.11896	0.000375215	0.00149214
POLR3K	RNA polymerase III subunit K	2.11876	7.69809e-05	0.000432963
RDH12	retinol dehydrogenase 12 (all-trans/9-cis/11-cis)	2.11849	0.000155932	0.000750744
LINGO3	leucine rich repeat and Ig domain containing 3	2.11699	0.000374994	0.00149172
ANKRD22	ankyrin repeat domain 22	2.11646	0.000143839	0.000703257
HSD11B1L	hydroxysteroid 11-beta dehydrogenase 1 like	2.11594	0.00018511	0.000853624
ABHD2	abhydrolase domain containing 2	2.11571	0.00188496	0.00543543
DLL1	delta like canonical Notch ligand 1	2.11492	0.00110357	0.00350959
C20orf96	chromosome 20 open reading frame 96	2.11275	2.09922e-05	0.000158978
CXADR	CXADR, Ig-like cell adhesion molecule	2.1106	0.00191256	0.00549767
C1orf122	chromosome 1 open reading frame 122	2.10961	3.93838e-05	0.000256476
NKPD1	NTPase KAP family P-loop domain containing 1	2.10674	0.000655574	0.00231308
QPRT	quinolinate phosphoribosyltransferase	2.10397	0.00129196	0.00398812
KANK1	KN motif and ankyrin repeat domains 1	2.10294	0.00483294	0.0117272
CITED4	Cbp/p300 interacting transactivator with Glu/Asp rich carboxy-terminal domain 4	2.09896	0.000267932	0.0011422
ALG1L	ALG1, chitobiosyldiphosphodolichol beta-mannosyltransferase like	2.09888	0.00025522	0.0010991
CPNE7	copine 7	2.09839	8.03811e-05	0.000447717
RNF223	ring finger protein 223	2.09831	4.43035e-05	0.0002804
PTRHD1	peptidyl-tRNA hydrolase domain containing 1	2.09573	0.000371479	0.00147911
CD33	CD33 molecule	2.0952	0.000122102	0.00062137
ZDHHC11	zinc finger DHHC-type containing 11	2.09318	0.00105462	0.00338159
TNNC1	troponin C1, slow skeletal and cardiac type	2.09257	0.00128716	0.00397741
CFAP70	cilia and flagella associated protein 70	2.08896	0.000560809	0.00205267
HIST1H3E	histone cluster 1 H3 family member e	2.08813	0.000226128	0.000998966
PLPP3	phospholipid phosphatase 3	2.08797	0.0026032	0.00705013
CHCHD5	coiled-coil-helix-coiled-coil-helix domain containing 5	2.08753	4.71736e-05	0.000294783
TMEM50B	transmembrane protein 50B	2.0861	0.000165734	0.000785443
DGKE	diacylglycerol kinase epsilon	2.08565	0.00893242	0.0194287
CYP2C19	cytochrome P450 family 2 subfamily C member 19	2.0853	0.000882782	0.00294085
TAPBPL	TAP binding protein like	2.08475	0.000407653	0.00159417
TSPAN1	tetraspanin 1	2.08171	0.00169511	0.00499577
FAM117A	family with sequence similarity 117 member A	2.0811	0.00217145	0.00610912
NSMCE1	NSE1 homolog, SMC5-SMC6 complex component	2.07991	7.52722e-06	7.49603e-05
COX6C	cytochrome c oxidase subunit 6C	2.07642	3.10665e-05	0.000215317
FAM89B	family with sequence similarity 89 member B	2.07511	4.81995e-05	0.000299299
ERBB2	erb-b2 receptor tyrosine kinase 2	2.07473	0.000157334	0.000755968
MMP16	matrix metallopeptidase 16	2.0746	0.0182167	0.0353399
PRR7	proline rich 7, synaptic	2.07423	1.69238e-05	0.000136637
DCST2	DC-STAMP domain containing 2	2.07069	0.000466964	0.00177195
ACSL1	acyl-CoA synthetase long chain family member 1	2.07054	0.000586705	0.00211904
ZNF358	zinc finger protein 358	2.07041	1.90618e-06	2.89744e-05
TXNDC16	thioredoxin domain containing 16	2.06933	0.00377539	0.00957015
ATP5J2	ATP synthase, H+ transporting, mitochondrial Fo complex subunit F2	2.06845	2.18581e-05	0.000163549
KCNG3	potassium voltage-gated channel modifier subfamily G member 3	2.06719	0.000742384	0.002552
KCNE2	potassium voltage-gated channel subfamily E regulatory subunit 2	2.06705	0.00013904	0.000685793
CCDC106	coiled-coil domain containing 106	2.06531	8.69423e-06	8.33532e-05
LRRC23	leucine rich repeat containing 23	2.06256	8.28425e-05	0.000458258
WDR5B	WD repeat domain 5B	2.06228	0.000236868	0.00103536
SLC43A1	solute carrier family 43 member 1	2.06114	1.77294e-05	0.00014145
CATIP	ciliogenesis associated TTC17 interacting protein	2.06032	0.000113582	0.000584729
PIGW	phosphatidylinositol glycan anchor biosynthesis class W	2.05969	0.000210101	0.000943383
CPT2	carnitine palmitoyltransferase 2	2.05899	0.000386562	0.00152638
JAG1	jagged 1	2.05881	0.0013746	0.00419576
STUB1	STIP1 homology and U-box containing protein 1	2.05803	8.94048e-07	1.75139e-05
NUDT2	nudix hydrolase 2	2.05776	3.35384e-05	0.000227653
PNPLA7	patatin like phospholipase domain containing 7	2.05698	0.000353205	0.00141824
IDNK	IDNK, gluconokinase	2.05484	0.000155578	0.000749776
LRRC75B	leucine rich repeat containing 75B	2.05428	0.000564838	0.00206212
GOLPH3L	golgi phosphoprotein 3 like	2.05383	6.54352e-05	0.00037985
PRKCH	protein kinase C eta	2.05292	0.000123826	0.00062839
NFIA	nuclear factor I A	2.05265	0.00575591	0.0135441
LOC101927322	uncharacterized LOC101927322	2.04974	0.000314584	0.00129948
GIMAP2	GTPase, IMAP family member 2	2.04972	0.000181677	0.000841118
POLD2	DNA polymerase delta 2, accessory subunit	2.04726	3.85043e-06	4.58655e-05
FAM177B	family with sequence similarity 177 member B	2.047	0.000337209	0.00136857
CRISPLD2	cysteine rich secretory protein LCCL domain containing 2	2.04377	0.00763159	0.0170597
C19orf73	chromosome 19 open reading frame 73	2.04306	0.00223444	0.00625206
EEF2KMT	eukaryotic elongation factor 2 lysine methyltransferase	2.04254	3.34686e-05	0.00022742
ABCA12	ATP binding cassette subfamily A member 12	2.04224	0.00118985	0.00373036
ARHGEF19	Rho guanine nucleotide exchange factor 19	2.03974	0.000283962	0.00119624
BBS4	Bardet-Biedl syndrome 4	2.03859	5.35028e-05	0.000324226
SAMD11	sterile alpha motif domain containing 11	2.03666	0.000568688	0.00207205
GRIN1	glutamate ionotropic receptor NMDA type subunit 1	2.03647	0.00292533	0.00775395
NDUFA1	NADH:ubiquinone oxidoreductase subunit A1	2.03382	0.000319448	0.00131352
TIMMDC1	translocase of inner mitochondrial membrane domain containing 1	2.03208	2.51445e-06	3.44268e-05
HIST1H2BJ	histone cluster 1 H2B family member j	2.03109	0.00013262	0.000661759
ZNF382	zinc finger protein 382	2.0302	0.000134826	0.000669739
NDUFAB1	NADH:ubiquinone oxidoreductase subunit AB1	2.02909	8.57218e-06	8.24382e-05
PLEKHJ1	pleckstrin homology domain containing J1	2.02777	1.89821e-05	0.000148348
NUBP2	nucleotide binding protein 2	2.02709	4.6931e-06	5.26753e-05
DBI	diazepam binding inhibitor, acyl-CoA binding protein	2.02566	8.72548e-06	8.35067e-05
IL17RC	interleukin 17 receptor C	2.02535	5.96014e-06	6.28288e-05
PRPH	peripherin	2.02476	0.000200864	0.000908446
ACP4	acid phosphatase 4	2.02386	7.05747e-05	0.000402044
GARNL3	GTPase activating Rap/RanGAP domain like 3	2.02242	0.00102019	0.0032959
MORN3	MORN repeat containing 3	2.02111	9.93311e-05	0.000525492
TBX1	T-box 1	2.01976	0.000685154	0.00239052
NDUFB11	NADH:ubiquinone oxidoreductase subunit B11	2.01775	1.11654e-05	9.94035e-05
LOC401052	uncharacterized LOC401052	2.01756	0.00110838	0.00352139
PNPLA4	patatin like phospholipase domain containing 4	2.01648	4.79902e-05	0.000298433
DENND1A	DENN domain containing 1A	2.01506	2.46059e-06	3.40528e-05
ZBED9	zinc finger BED-type containing 9	2.01452	0.00142151	0.00431737
SUGCT	succinyl-CoA:glutarate-CoA transferase	2.01289	0.000143506	0.00070242
MKNK2	MAP kinase interacting serine/threonine kinase 2	2.01236	1.86843e-05	0.000146696
MAP4K1	mitogen-activated protein kinase kinase kinase kinase 1	2.01116	0.000303911	0.00126136
LACTB2	lactamase beta 2	2.01011	5.8595e-05	0.000347767
SARAF	store-operated calcium entry associated regulatory factor	2.00958	8.03621e-07	1.66823e-05
PRPF38A	pre-mRNA processing factor 38A	2.00829	1.06402e-05	9.57918e-05
C2orf15	chromosome 2 open reading frame 15	2.00779	0.000588585	0.00212312
RUNDC3A	RUN domain containing 3A	2.00685	0.000689519	0.00240034
ZC2HC1C	zinc finger C2HC-type containing 1C	2.00244	9.40818e-05	0.000505222
CARNS1	carnosine synthase 1	2.00185	0.000474553	0.00179527
EPHA10	EPH receptor A10	2.00119	0.0028602	0.00761391
UQCC2	ubiquinol-cytochrome c reductase complex assembly factor 2	2.0003	7.33381e-05	0.000415572
NEXMIF	neurite extension and migration factor	1.99722	0.00191122	0.0054963
ABCA7	ATP binding cassette subfamily A member 7	1.99514	0.00136066	0.0041651
SERPIND1	serpin family D member 1	1.99408	0.00136224	0.00416816
PNMA6A	paraneoplastic Ma antigen family member 6A	1.99383	0.000513051	0.00191335
DPCD	deleted in primary ciliary dyskinesia homolog (mouse)	1.99363	1.98037e-05	0.000152407
PIGM	phosphatidylinositol glycan anchor biosynthesis class M	1.99306	0.000188268	0.000863839
SHF	Src homology 2 domain containing F	1.99294	0.000208071	0.00093661
SHBG	sex hormone binding globulin	1.99166	0.000250673	0.00108279
ZNF775	zinc finger protein 775	1.99038	9.9065e-05	0.00052444
PPDPF	pancreatic progenitor cell differentiation and proliferation factor	1.98922	2.2919e-06	3.25252e-05
PSCA	prostate stem cell antigen	1.98687	0.000570806	0.00207741
CLEC7A	C-type lectin domain containing 7A	1.98656	0.000117249	0.000601436
TMEM238	transmembrane protein 238	1.98548	0.000431059	0.00166819
ATP2A1	ATPase sarcoplasmic/endoplasmic reticulum Ca2+ transporting 1	1.98489	0.000542213	0.00200001
GNG5	G protein subunit gamma 5	1.98264	9.09287e-06	8.5585e-05
NKD1	naked cuticle homolog 1	1.98257	0.000365471	0.00145791
ORMDL2	ORMDL sphingolipid biosynthesis regulator 2	1.98224	4.39054e-05	0.000278292
NDUFA4	NDUFA4, mitochondrial complex associated	1.98146	0.000108511	0.000564285
EPB41L4B	erythrocyte membrane protein band 4.1 like 4B	1.98008	6.3222e-05	0.000369847
VILL	villin like	1.9798	0.00373781	0.00949552
IMMP2L	inner mitochondrial membrane peptidase subunit 2	1.9783	8.75631e-05	0.000478631
CROT	carnitine O-octanoyltransferase	1.97675	0.00102702	0.00331129
NPNT	nephronectin	1.97651	0.0194899	0.0373689
F10	coagulation factor X	1.97594	9.86583e-05	0.000523661
PDCD6	programmed cell death 6	1.97557	5.52562e-06	5.92711e-05
MANEA	mannosidase endo-alpha	1.97452	0.000142543	0.000699039
TLL2	tolloid like 2	1.97345	0.00193163	0.00554382
SAXO2	stabilizer of axonemal microtubules 2	1.97334	0.000508938	0.00189912
SI	sucrase-isomaltase	1.9731	0.00299267	0.00790305
GBA2	glucosylceramidase beta 2	1.97138	1.80817e-05	0.000143457
ANKEF1	ankyrin repeat and EF-hand domain containing 1	1.97045	0.00221748	0.0062168
PTPRS	protein tyrosine phosphatase, receptor type S	1.96977	0.00344573	0.00888149
PRSS54	protease, serine 54	1.96745	0.00173116	0.00508564
CENPX	centromere protein X	1.96714	0.000213653	0.000954703
ATP4A	ATPase H+/K+ transporting alpha subunit	1.96687	0.000116157	0.000596786
FGFRL1	fibroblast growth factor receptor like 1	1.96659	0.000800459	0.0027131
FAM198A	family with sequence similarity 198 member A	1.96648	0.000186057	0.000857065
TMEM192	transmembrane protein 192	1.96635	0.000140319	0.000690221
HDDC3	HD domain containing 3	1.96352	7.86636e-05	0.000440688
MAZ	MYC associated zinc finger protein	1.96286	2.23459e-06	3.1995e-05
GCAT	glycine C-acetyltransferase	1.9619	6.25507e-06	6.50294e-05
LRIG1	leucine rich repeats and immunoglobulin like domains 1	1.9589	0.0158873	0.0315069
RIC3	RIC3 acetylcholine receptor chaperone	1.95822	0.000172885	0.000810801
ACOXL	acyl-CoA oxidase like	1.95723	0.000171142	0.000806604
DCP1B	decapping mRNA 1B	1.95675	0.00502077	0.0120689
MPP2	membrane palmitoylated protein 2	1.95625	0.00114415	0.00360914
FIS1	fission, mitochondrial 1	1.95297	2.15683e-05	0.000162192
GPC2	glypican 2	1.95226	0.000863082	0.00289387
ATPIF1	ATPase inhibitory factor 1	1.95158	2.32799e-05	0.000171151
TUT1	terminal uridylyl transferase 1, U6 snRNA-specific	1.94966	0.000180432	0.000837773
PON2	paraoxonase 2	1.94872	3.70325e-06	4.48198e-05
PDZD4	PDZ domain containing 4	1.9486	8.53936e-05	0.000468893
HIST1H2BD	histone cluster 1 H2B family member d	1.94819	0.000301782	0.00125452
ERGIC1	endoplasmic reticulum-golgi intermediate compartment 1	1.94702	5.02225e-05	0.000308575
DEGS1	delta 4-desaturase, sphingolipid 1	1.94589	4.65539e-05	0.000291479
ZNF728	zinc finger protein 728	1.94576	0.0262237	0.0480057
MYBL2	MYB proto-oncogene like 2	1.94572	1.73829e-05	0.000139378
RBP4	retinol binding protein 4	1.94555	0.00358374	0.00917314
PACRG	parkin coregulated	1.94407	0.00196916	0.00563013
FLVCR2	feline leukemia virus subgroup C cellular receptor family member 2	1.94387	0.00351591	0.00902291
C17orf100	chromosome 17 open reading frame 100	1.94373	0.000861	0.00288854
SWSAP1	SWIM-type zinc finger 7 associated protein 1	1.94352	0.000217357	0.000967546
SNTA1	syntrophin alpha 1	1.94304	3.88658e-05	0.000253772
GDPGP1	GDP-D-glucose phosphorylase 1	1.94171	0.00102443	0.00330516
GRASP	general receptor for phosphoinositides 1 associated scaffold protein	1.94119	0.00502309	0.0120699
SBK1	SH3 domain binding kinase 1	1.93985	0.00425715	0.0105618
TOMM7	translocase of outer mitochondrial membrane 7	1.93883	0.000606294	0.00217411
MYO1D	myosin ID	1.93857	0.0142142	0.028699
MXD4	MAX dimerization protein 4	1.93738	1.89872e-05	0.000148348
SYCP3	synaptonemal complex protein 3	1.93633	0.00184615	0.00535117
KCNH6	potassium voltage-gated channel subfamily H member 6	1.93477	0.000595906	0.00214262
ASAH1	N-acylsphingosine amidohydrolase 1	1.93193	6.85288e-05	0.000392656
EBF2	early B-cell factor 2	1.93066	0.00185602	0.00537786
PEX11A	peroxisomal biogenesis factor 11 alpha	1.93018	0.00010424	0.000545837
PLPPR2	phospholipid phosphatase related 2	1.92513	1.89058e-05	0.000147982
FAN1	FANCD2 and FANCI associated nuclease 1	1.9251	0.000887361	0.00295304
ERI2	ERI1 exoribonuclease family member 2	1.92457	0.000326458	0.00133593
FAM86B1	family with sequence similarity 86 member B1	1.92445	0.000299781	0.00124867
TNFSF13	TNF superfamily member 13	1.92364	0.000616129	0.00220238
ZNF613	zinc finger protein 613	1.92319	8.30168e-05	0.000458468
MTERF4	mitochondrial transcription termination factor 4	1.92318	0.000133749	0.000666616
CMPK2	cytidine/uridine monophosphate kinase 2	1.92149	0.000248468	0.00107617
UQCRQ	ubiquinol-cytochrome c reductase complex III subunit VII	1.92148	9.47166e-05	0.000507569
	NA	1.9198	0.000128988	0.000649191
TMEM47	transmembrane protein 47	1.91536	0.00172992	0.00508319
C16orf86	chromosome 16 open reading frame 86	1.91161	0.00193459	0.0055486
OVGP1	oviductal glycoprotein 1	1.91157	0.00175207	0.00513534
PRKAR2B	protein kinase cAMP-dependent type II regulatory subunit beta	1.90856	0.00142494	0.0043248
WDR88	WD repeat domain 88	1.90855	0.00177373	0.00518071
PLA2G5	phospholipase A2 group V	1.90852	0.000152132	0.00073492
POLB	DNA polymerase beta	1.90817	0.000196031	0.000890537
HOXA5	homeobox A5	1.90716	0.000116708	0.000599138
TCEANC	transcription elongation factor A N-terminal and central domain containing	1.90614	0.000864469	0.00289488
PRRT3	proline rich transmembrane protein 3	1.90317	0.00101124	0.00327523
PYM1	PYM homolog 1, exon junction complex associated factor	1.90177	1.29291e-05	0.000110307
COQ7	coenzyme Q7, hydroxylase	1.90077	8.02759e-05	0.000447571
NUDT9	nudix hydrolase 9	1.8999	9.11836e-05	0.000492545
CTAGE4	CTAGE family member 4	1.89895	0.000726941	0.0025117
C15orf65	chromosome 15 open reading frame 65	1.8981	0.0003604	0.00144261
FAM173A	family with sequence similarity 173 member A	1.89807	0.000226881	0.00100126
MORN4	MORN repeat containing 4	1.89751	0.000156012	0.000750744
LSM10	LSM10, U7 small nuclear RNA associated	1.89563	0.000274998	0.00116665
C19orf25	chromosome 19 open reading frame 25	1.89493	0.000732377	0.00252708
MLXIPL	MLX interacting protein like	1.89456	0.000895783	0.00297259
MAGEF1	MAGE family member F1	1.89277	6.25045e-05	0.000366653
KLRG2	killer cell lectin like receptor G2	1.88881	0.001046	0.00335898
FAM227B	family with sequence similarity 227 member B	1.88634	0.00145407	0.00439959
TMPRSS9	transmembrane protease, serine 9	1.88591	0.000325648	0.00133389
EAF2	ELL associated factor 2	1.88576	0.000265945	0.001135
FUCA1	fucosidase, alpha-L- 1, tissue	1.88562	0.00174374	0.00511558
THEM5	thioesterase superfamily member 5	1.8836	0.000216919	0.000966268
HOXC12	homeobox C12	1.88322	0.00769648	0.0171838
PARK7	Parkinsonism associated deglycase	1.88224	4.50753e-06	5.12652e-05
FOXD1	forkhead box D1	1.88191	0.00124539	0.00386667
C8orf4	chromosome 8 open reading frame 4	1.88098	0.00268463	0.00723098
LCMT2	leucine carboxyl methyltransferase 2	1.8802	0.000339914	0.00137622
SLC50A1	solute carrier family 50 member 1	1.87941	3.13593e-06	4.01906e-05
MRPL57	mitochondrial ribosomal protein L57	1.87857	0.000163769	0.000778725
GALNT11	polypeptide N-acetylgalactosaminyltransferase 11	1.8776	9.73068e-06	8.98093e-05
LRRC27	leucine rich repeat containing 27	1.87714	0.000550736	0.00202331
SLC25A16	solute carrier family 25 member 16	1.87672	7.1178e-05	0.000404941
TG	thyroglobulin	1.87604	0.00409323	0.0102258
NDUFB4	NADH:ubiquinone oxidoreductase subunit B4	1.87514	4.97587e-06	5.5078e-05
LOC388780	uncharacterized LOC388780	1.87449	0.00010823	0.000563051
LAMTOR4	late endosomal/lysosomal adaptor, MAPK and MTOR activator 4	1.87272	8.2975e-05	0.000458468
ALOXE3	arachidonate lipoxygenase 3	1.87206	0.00245119	0.00672361
REPIN1	replication initiator 1	1.86994	8.93704e-05	0.000485202
FAM184B	family with sequence similarity 184 member B	1.86981	0.00158923	0.00472498
MRPS28	mitochondrial ribosomal protein S28	1.86936	4.56395e-05	0.000287012
CNPY2	canopy FGF signaling regulator 2	1.86852	4.2186e-05	0.000270332
PARVG	parvin gamma	1.86445	0.000989534	0.00321711
C1QTNF3	C1q and TNF related 3	1.86203	0.00171767	0.00505297
RDH11	retinol dehydrogenase 11 (all-trans/9-cis/11-cis)	1.86174	0.000602608	0.00216369
ASTN2	astrotactin 2	1.86094	0.000255186	0.0010991
CASC1	cancer susceptibility 1	1.8607	0.00503458	0.0120924
ARHGAP4	Rho GTPase activating protein 4	1.85968	0.00653739	0.0150463
ATP6V0B	ATPase H+ transporting V0 subunit b	1.85944	0.000101428	0.000534603
FRAT1	FRAT1, WNT signaling pathway regulator	1.85824	0.00232329	0.00644444
NUDT16	nudix hydrolase 16	1.858	4.83248e-05	0.000299932
C12orf73	chromosome 12 open reading frame 73	1.85661	6.60769e-05	0.000382364
ETFBKMT	electron transfer flavoprotein beta subunit lysine methyltransferase	1.8563	0.0011256	0.00356375
RNF41	ring finger protein 41	1.85454	1.50134e-05	0.000124746
RPS27L	ribosomal protein S27 like	1.85427	0.000158038	0.000758784
GGT1	gamma-glutamyltransferase 1	1.85263	0.0169989	0.0332944
DDO	D-aspartate oxidase	1.85198	0.00155726	0.00464957
PCED1A	PC-esterase domain containing 1A	1.8519	0.000272527	0.00115762
MFSD7	major facilitator superfamily domain containing 7	1.85101	0.000313872	0.00129767
TFF1	trefoil factor 1	1.8508	0.00092841	0.00305791
EEFSEC	eukaryotic elongation factor, selenocysteine-tRNA specific	1.85023	0.000211397	0.000947654
HOXC4	homeobox C4	1.84979	0.00321559	0.00839154
INTS10	integrator complex subunit 10	1.84972	4.03458e-05	0.000261413
FRAT2	FRAT2, WNT signaling pathway regulator	1.84966	0.000129483	0.00065117
RAB40C	RAB40C, member RAS oncogene family	1.84936	0.000165964	0.000785839
TTYH1	tweety family member 1	1.84903	0.000544561	0.00200579
CHPT1	choline phosphotransferase 1	1.84866	0.000183493	0.000848604
MRPS34	mitochondrial ribosomal protein S34	1.84836	1.08177e-05	9.6914e-05
CCDC40	coiled-coil domain containing 40	1.84733	0.00175564	0.00514202
SLC2A4	solute carrier family 2 member 4	1.8464	0.00107456	0.00343437
FBXL15	F-box and leucine rich repeat protein 15	1.84542	0.000135826	0.000673088
NTNG1	netrin G1	1.84515	0.00457045	0.0111855
SCMH1	sex comb on midleg homolog 1 (Drosophila)	1.84445	3.19996e-05	0.000220238
COQ8A	coenzyme Q8A	1.84441	0.00103624	0.00333514
TFR2	transferrin receptor 2	1.84427	0.000257257	0.00110598
STON2	stonin 2	1.84267	0.00472389	0.0115105
TIGD1	tigger transposable element derived 1	1.84238	0.000316641	0.00130491
ANKH	ANKH inorganic pyrophosphate transport regulator	1.8422	3.28933e-05	0.000224581
LIAS	lipoic acid synthetase	1.84154	0.000433011	0.00167423
PLGRKT	plasminogen receptor with a C-terminal lysine	1.83995	0.000967652	0.00316361
GJD3	gap junction protein delta 3	1.83878	0.000863516	0.00289395
RSPH14	radial spoke head 14 homolog	1.83827	0.00046726	0.00177228
BEND5	BEN domain containing 5	1.83759	0.000916696	0.00302866
NUDT14	nudix hydrolase 14	1.83702	6.56314e-05	0.000380817
POMGNT1	protein O-linked mannose N-acetylglucosaminyltransferase 1 (beta 1,2-)	1.83613	2.16976e-06	3.15241e-05
HIST1H2AK	histone cluster 1 H2A family member k	1.83404	0.00214476	0.00604595
JMJD4	jumonji domain containing 4	1.83234	1.55596e-05	0.000128287
DUSP15	dual specificity phosphatase 15	1.83205	0.00142497	0.0043248
ECE2	endothelin converting enzyme 2	1.83173	0.000125169	0.0006337
CCDC136	coiled-coil domain containing 136	1.83001	0.00707356	0.0160614
DNAJC19	DnaJ heat shock protein family (Hsp40) member C19	1.82995	0.000159197	0.000762984
RPS6KB2	ribosomal protein S6 kinase B2	1.82957	6.85184e-06	6.99596e-05
JMJD7	jumonji domain containing 7	1.8293	0.000541721	0.00199877
COQ3	coenzyme Q3, methyltransferase	1.82838	0.00145352	0.00439898
HDHD2	haloacid dehalogenase like hydrolase domain containing 2	1.8283	2.44267e-05	0.00017795
LOC554223	histocompatibility antigen-related	1.82801	0.000290809	0.00121802
DNAH10	dynein axonemal heavy chain 10	1.82752	0.00168979	0.00498353
BANK1	B-cell scaffold protein with ankyrin repeats 1	1.8267	0.00252248	0.00687453
B4GALT2	beta-1,4-galactosyltransferase 2	1.82628	1.84557e-05	0.000145565
RAB3IL1	RAB3A interacting protein like 1	1.82559	0.000792209	0.0026894
SH2B1	SH2B adaptor protein 1	1.82551	0.000193081	0.000880623
CBR4	carbonyl reductase 4	1.82551	0.000387726	0.0015297
PKDCC	protein kinase domain containing, cytoplasmic	1.82403	0.000578121	0.00209508
MRPL37	mitochondrial ribosomal protein L37	1.82324	1.72864e-06	2.70778e-05
ODAM	odontogenic, ameloblast asssociated	1.82288	0.000576479	0.00209212
ZNF583	zinc finger protein 583	1.8211	0.000230135	0.00101214
ACAA1	acetyl-CoA acyltransferase 1	1.81973	4.27824e-06	4.93132e-05
NIPSNAP2	nipsnap homolog 2	1.81911	1.75547e-05	0.000140374
JTB	jumping translocation breakpoint	1.81555	0.000176461	0.000824106
CNNM1	cyclin and CBS domain divalent metal cation transport mediator 1	1.81541	0.0147871	0.0296643
C2CD4D	C2 calcium dependent domain containing 4D	1.8152	0.000130498	0.000654619
C1orf106	chromosome 1 open reading frame 106	1.8148	0.000843987	0.00284037
UNC5C	unc-5 netrin receptor C	1.81373	0.000436966	0.00168574
DDR1	discoidin domain receptor tyrosine kinase 1	1.81247	0.000679678	0.00237656
UNC119	unc-119 lipid binding chaperone	1.81002	3.03964e-05	0.000212047
YBEY	ybeY metallopeptidase (putative)	1.80975	0.000118738	0.000607615
DNPH1	2'-deoxynucleoside 5'-phosphate N-hydrolase 1	1.8094	0.000570575	0.00207716
FN3K	fructosamine 3 kinase	1.80899	0.00655538	0.0150796
SCO2	SCO2, cytochrome c oxidase assembly protein	1.80824	0.000107869	0.000561856
SSR4	signal sequence receptor subunit 4	1.80811	6.07292e-05	0.000358829
ICAM3	intercellular adhesion molecule 3	1.80526	4.10119e-05	0.000264392
ALX4	ALX homeobox 4	1.80453	0.000177122	0.000825347
TMEM177	transmembrane protein 177	1.8034	0.00230297	0.00641025
C16orf96	chromosome 16 open reading frame 96	1.80269	0.000257854	0.00110747
USP2	ubiquitin specific peptidase 2	1.80057	0.0104275	0.0221225
PWWP2B	PWWP domain containing 2B	1.80033	4.89385e-05	0.000303007
ZNF511	zinc finger protein 511	1.7985	0.000172693	0.000810801
ZNF385B	zinc finger protein 385B	1.79843	0.0215683	0.0406493
DDTL	D-dopachrome tautomerase like	1.79803	0.000225619	0.000997403
	NA	1.79723	0.000159013	0.000762607
TIMM13	translocase of inner mitochondrial membrane 13	1.79634	5.69081e-05	0.000339412
PET117	PET117 homolog	1.79563	0.000538353	0.00198806
C10orf95	chromosome 10 open reading frame 95	1.79504	0.000460797	0.00175469
CCDC121	coiled-coil domain containing 121	1.79371	0.0112572	0.02359
ORC5	origin recognition complex subunit 5	1.79281	7.60747e-05	0.000428806
IMPA2	inositol monophosphatase 2	1.79182	8.88032e-05	0.000482795
TMEM99	transmembrane protein 99	1.79168	0.000111807	0.000577211
ACY1	aminoacylase 1	1.79074	1.92629e-06	2.91077e-05
MALT1	MALT1 paracaspase	1.79071	0.000361234	0.0014446
C9orf163	chromosome 9 open reading frame 163	1.78956	0.000527728	0.00195671
NAT2	N-acetyltransferase 2	1.78942	0.000501766	0.00187873
ADGRL1	adhesion G protein-coupled receptor L1	1.78822	0.013875	0.0281339
BEX2	brain expressed X-linked 2	1.78775	8.3646e-05	0.000461347
BRICD5	BRICHOS domain containing 5	1.78755	0.000611811	0.00218938
ZNF517	zinc finger protein 517	1.78578	0.00078873	0.00267901
PUDP	pseudouridine 5'-phosphatase	1.78567	0.00055763	0.00204337
HYKK	hydroxylysine kinase	1.78406	0.002807	0.00750228
IQCC	IQ motif containing C	1.78348	0.000722809	0.00250011
APOO	apolipoprotein O	1.78335	6.38794e-05	0.000373013
ATRAID	all-trans retinoic acid induced differentiation factor	1.78308	8.89891e-06	8.45661e-05
TMEM234	transmembrane protein 234	1.78269	0.000362153	0.00144738
FOLH1B	folate hydrolase 1B	1.77967	0.00135011	0.00413774
NAXE	NAD(P)HX epimerase	1.77691	9.89215e-06	9.09071e-05
C18orf32	chromosome 18 open reading frame 32	1.77484	0.000289346	0.00121348
ZNF280B	zinc finger protein 280B	1.77435	0.00499671	0.0120178
CCDC167	coiled-coil domain containing 167	1.77346	0.000982567	0.00320106
RABEP2	rabaptin, RAB GTPase binding effector protein 2	1.77173	4.20648e-05	0.000269825
ALDOC	aldolase, fructose-bisphosphate C	1.7701	1.01109e-05	9.23222e-05
RTN4RL1	reticulon 4 receptor like 1	1.76998	0.0108803	0.0229277
SYBU	syntabulin	1.76981	0.000332184	0.00135343
ANKRD65	ankyrin repeat domain 65	1.76846	0.000159787	0.000765177
SLC25A18	solute carrier family 25 member 18	1.76637	0.000615789	0.00220177
FAM210B	family with sequence similarity 210 member B	1.76618	0.00204391	0.00580631
PTPMT1	protein tyrosine phosphatase, mitochondrial 1	1.76602	0.000137362	0.000678933
ABCB6	ATP binding cassette subfamily B member 6 (Langereis blood group)	1.76525	5.93056e-05	0.000351423
SLC22A1	solute carrier family 22 member 1	1.76481	0.000529384	0.00196172
STYK1	serine/threonine/tyrosine kinase 1	1.76397	0.0018296	0.0053128
PNKD	paroxysmal nonkinesigenic dyskinesia	1.76379	6.96918e-05	0.000398075
PYCR1	pyrroline-5-carboxylate reductase 1	1.76374	4.25547e-05	0.000271744
ZNF793	zinc finger protein 793	1.76372	0.013123	0.0268852
EPB41	erythrocyte membrane protein band 4.1	1.76282	0.0265954	0.0484993
IFT22	intraflagellar transport 22	1.7622	5.38057e-05	0.000325343
C1orf53	chromosome 1 open reading frame 53	1.76212	0.000610656	0.00218586
NLRP11	NLR family pyrin domain containing 11	1.76206	0.000202742	0.000914872
ZNF730	zinc finger protein 730	1.76166	0.000568294	0.00207171
ARRDC1-AS1	ARRDC1 antisense RNA 1	1.7611	0.000160893	0.000768654
UBE2D4	ubiquitin conjugating enzyme E2 D4 (putative)	1.75984	0.000129868	0.000652598
FSCN2	fascin actin-bundling protein 2, retinal	1.75734	0.00494199	0.0119264
SIGIRR	single Ig and TIR domain containing	1.75689	5.66134e-05	0.000338664
CDK5	cyclin dependent kinase 5	1.75655	1.36926e-05	0.000115949
HIST1H2BL	histone cluster 1 H2B family member l	1.75626	0.00119317	0.00373983
CLDND2	claudin domain containing 2	1.75606	0.000171398	0.000807218
RPA3	replication protein A3	1.75524	0.000323446	0.00132699
MPZL3	myelin protein zero like 3	1.75432	0.00533817	0.0127103
ADCK2	aarF domain containing kinase 2	1.75407	1.05287e-05	9.50802e-05
SPECC1	sperm antigen with calponin homology and coiled-coil domains 1	1.75229	0.000433506	0.00167564
BLVRA	biliverdin reductase A	1.75001	0.000104322	0.000546039
C8orf34	chromosome 8 open reading frame 34	1.74983	0.0009981	0.00324004
RPS6	ribosomal protein S6	1.74974	0.000128335	0.000646411
ACADSB	acyl-CoA dehydrogenase, short/branched chain	1.74897	0.000938234	0.00308393
SMARCD3	SWI/SNF related, matrix associated, actin dependent regulator of chromatin, subfamily d, member 3	1.74837	0.000546313	0.00201167
ABHD1	abhydrolase domain containing 1	1.74795	0.000975113	0.00318313
C19orf57	chromosome 19 open reading frame 57	1.74789	0.0011282	0.00356845
PHKG2	phosphorylase kinase catalytic subunit gamma 2	1.74742	2.75929e-05	0.000196879
UQCC3	ubiquinol-cytochrome c reductase complex assembly factor 3	1.7447	0.00276209	0.00740695
TXNL4A	thioredoxin like 4A	1.74429	5.3726e-05	0.000325118
DNAJC30	DnaJ heat shock protein family (Hsp40) member C30	1.74302	4.27572e-05	0.00027263
PRSS27	protease, serine 27	1.74208	0.00241275	0.00664397
FAM234A	family with sequence similarity 234 member A	1.74202	4.58547e-05	0.000287522
TMEM121	transmembrane protein 121	1.74198	0.000514149	0.00191633
RHPN2	rhophilin Rho GTPase binding protein 2	1.74126	0.00307531	0.00809782
CTRL	chymotrypsin like	1.74018	0.00518777	0.0123983
CRYBG2	crystallin beta-gamma domain containing 2	1.73986	0.001998	0.00569658
TTC8	tetratricopeptide repeat domain 8	1.73934	0.000110204	0.000571469
MTUS1	microtubule associated scaffold protein 1	1.73863	0.0156774	0.0311581
HTR5A	5-hydroxytryptamine receptor 5A	1.7383	0.00527604	0.0125951
SAR1B	secretion associated Ras related GTPase 1B	1.73821	8.82244e-05	0.00048122
PRMT6	protein arginine methyltransferase 6	1.73754	0.000349611	0.00140557
AEBP1	AE binding protein 1	1.73716	0.0128063	0.0263204
TRIM52	tripartite motif containing 52	1.737	0.00217305	0.00611226
SMAD6	SMAD family member 6	1.73672	0.0090321	0.0196081
PKHD1L1	PKHD1 like 1	1.73656	0.00180479	0.00525621
ZC3H6	zinc finger CCCH-type containing 6	1.73639	0.001754	0.00513942
ARF5	ADP ribosylation factor 5	1.73637	8.82772e-06	8.40768e-05
ZNF497	zinc finger protein 497	1.73634	0.000941056	0.00309163
HTR2C	5-hydroxytryptamine receptor 2C	1.73388	0.0224666	0.042095
FAM174A	family with sequence similarity 174 member A	1.73288	0.000281287	0.00118744
MSRB2	methionine sulfoxide reductase B2	1.7322	0.000183241	0.000847744
ECI1	enoyl-CoA delta isomerase 1	1.73183	4.772e-05	0.000297146
RFX5	regulatory factor X5	1.73131	6.6991e-05	0.000386434
SPTBN4	spectrin beta, non-erythrocytic 4	1.73087	0.00609571	0.0141876
CRYL1	crystallin lambda 1	1.73042	5.06694e-05	0.000310726
DNASE1L3	deoxyribonuclease 1 like 3	1.72967	0.00104077	0.00334615
COQ8B	coenzyme Q8B	1.72955	3.42378e-05	0.000231103
CHADL	chondroadherin like	1.72929	0.00446338	0.0109737
HUS1	HUS1 checkpoint clamp component	1.72794	7.61527e-05	0.000428962
GSTM3	glutathione S-transferase mu 3	1.72706	4.54275e-05	0.000285961
GRHL3	grainyhead like transcription factor 3	1.72494	0.00191215	0.00549767
SH2B2	SH2B adaptor protein 2	1.7247	0.000538019	0.0019874
NOS3	nitric oxide synthase 3	1.7242	0.0034344	0.00885628
CMC4	C-X9-C motif containing 4	1.72375	0.00221099	0.00620266
TMEM79	transmembrane protein 79	1.72208	0.000397816	0.00156455
IQCG	IQ motif containing G	1.7212	0.000461149	0.00175502
KMT5C	lysine methyltransferase 5C	1.72085	0.000253454	0.00109296
SUSD2	sushi domain containing 2	1.7208	0.00912987	0.0197716
MFSD11	major facilitator superfamily domain containing 11	1.7204	0.000241676	0.00105279
C14orf79	chromosome 14 open reading frame 79	1.7201	0.00216153	0.0060852
FAM47E	family with sequence similarity 47 member E	1.7192	0.000523842	0.00194547
ZNF821	zinc finger protein 821	1.71887	0.000655542	0.00231308
OSBPL5	oxysterol binding protein like 5	1.71845	0.000450299	0.0017229
MRPL24	mitochondrial ribosomal protein L24	1.71839	1.00073e-05	9.1637e-05
ATG10	autophagy related 10	1.71686	0.000943223	0.00309637
DBP	D-box binding PAR bZIP transcription factor	1.71662	0.00661637	0.0151969
TRIM68	tripartite motif containing 68	1.71584	0.00562107	0.0132883
ELOVL7	ELOVL fatty acid elongase 7	1.71494	0.00611132	0.01422
C1QTNF1	C1q and TNF related 1	1.71484	0.000659329	0.00232313
TMEM8B	transmembrane protein 8B	1.71481	0.00234717	0.00649669
SLC9A3	solute carrier family 9 member A3	1.71442	0.00172288	0.00506374
TRO	trophinin	1.71434	0.000244389	0.00106244
MLPH	melanophilin	1.7143	0.00145574	0.00440257
ZNF837	zinc finger protein 837	1.71311	0.00442255	0.0109005
LAMC3	laminin subunit gamma 3	1.71201	0.000586424	0.00211863
KIF9	kinesin family member 9	1.71	0.000379125	0.00150535
NSMCE2	NSE2/MMS21 homolog, SMC5-SMC6 complex SUMO ligase	1.70962	0.000196912	0.000893907
MTERF2	mitochondrial transcription termination factor 2	1.70946	0.00090211	0.00298817
PHPT1	phosphohistidine phosphatase 1	1.70944	0.000117654	0.000602795
DCAF11	DDB1 and CUL4 associated factor 11	1.70834	7.78369e-06	7.65325e-05
H1FX	H1 histone family member X	1.7055	0.000317426	0.0013073
TBC1D14	TBC1 domain family member 14	1.70401	0.00287841	0.00765012
OLFM1	olfactomedin 1	1.70374	0.000287581	0.00120844
PLLP	plasmolipin	1.70211	0.00104096	0.00334615
CBX4	chromobox 4	1.7014	0.000230644	0.00101319
ELAC1	elaC ribonuclease Z 1	1.70055	0.00494632	0.0119339
LRRC36	leucine rich repeat containing 36	1.69787	0.00250153	0.00683538
UNC80	unc-80 homolog, NALCN channel complex subunit	1.6972	0.00765866	0.0171143
ZBTB8B	zinc finger and BTB domain containing 8B	1.69646	0.000752315	0.00257853
CDK20	cyclin dependent kinase 20	1.69628	0.00177229	0.00517803
KSR2	kinase suppressor of ras 2	1.69594	0.00111793	0.00354734
SLC10A7	solute carrier family 10 member 7	1.69538	0.0148513	0.0297839
STAP2	signal transducing adaptor family member 2	1.69534	3.26754e-05	0.00022345
RPP25L	ribonuclease P/MRP subunit p25 like	1.69465	0.000337935	0.00137006
CBWD2	COBW domain containing 2	1.6946	0.000230516	0.00101312
C9orf129	chromosome 9 open reading frame 129	1.69375	0.000315497	0.00130187
NHSL2	NHS like 2	1.69349	0.00133201	0.00408909
SLC22A5	solute carrier family 22 member 5	1.69227	0.00151684	0.00455299
HOXB7	homeobox B7	1.69226	0.00248257	0.00679515
SMPDL3A	sphingomyelin phosphodiesterase acid like 3A	1.69053	0.000891781	0.00296314
ULK3	unc-51 like kinase 3	1.68997	1.33641e-05	0.000113767
SLC22A11	solute carrier family 22 member 11	1.68779	0.000420347	0.00163702
EFNA4	ephrin A4	1.68646	0.000686081	0.00239113
AQP4	aquaporin 4	1.6861	0.000766538	0.0026166
MRPL55	mitochondrial ribosomal protein L55	1.68369	6.08867e-05	0.000359134
ZFP62	ZFP62 zinc finger protein	1.68337	0.00528696	0.0126145
ZDHHC9	zinc finger DHHC-type containing 9	1.68314	0.00156389	0.00466042
GBX2	gastrulation brain homeobox 2	1.68207	0.000576036	0.00209111
ZDHHC12	zinc finger DHHC-type containing 12	1.68117	2.79213e-05	0.00019878
CIPC	CLOCK interacting pacemaker	1.68106	0.00451921	0.0110939
SRD5A3	steroid 5 alpha-reductase 3	1.68025	2.09717e-05	0.000158917
MAJIN	membrane anchored junction protein	1.67957	0.00432498	0.0106928
DXO	decapping exoribonuclease	1.67844	0.000168302	0.000795854
HIST1H2AM	histone cluster 1 H2A family member m	1.67725	0.0022972	0.00639571
PPFIBP2	PPFIA binding protein 2	1.67454	0.00177402	0.00518071
TSPAN9	tetraspanin 9	1.67416	0.00970297	0.0208125
PLCXD2	phosphatidylinositol specific phospholipase C X domain containing 2	1.67306	0.0113957	0.0238413
COL9A2	collagen type IX alpha 2 chain	1.67055	0.00555865	0.0131596
SLC16A6	solute carrier family 16 member 6	1.66988	0.0109851	0.0231218
CBX2	chromobox 2	1.66973	0.00499136	0.0120089
CCDC85A	coiled-coil domain containing 85A	1.66844	0.00697291	0.015875
RAC3	ras-related C3 botulinum toxin substrate 3 (rho family, small GTP binding protein Rac3)	1.66763	0.000380007	0.00150792
RETREG1	reticulophagy regulator 1	1.66713	0.00334908	0.00868514
N4BP3	NEDD4 binding protein 3	1.66567	0.00197908	0.00565093
DLX1	distal-less homeobox 1	1.66532	0.00385844	0.00974665
PECR	peroxisomal trans-2-enoyl-CoA reductase	1.66532	0.000497124	0.00186371
SFXN2	sideroflexin 2	1.66473	0.00209607	0.00592955
NDUFAF3	NADH:ubiquinone oxidoreductase complex assembly factor 3	1.6639	1.05386e-05	9.50802e-05
SMARCD2	SWI/SNF related, matrix associated, actin dependent regulator of chromatin, subfamily d, member 2	1.66231	0.000122104	0.00062137
SEMA3G	semaphorin 3G	1.66182	0.0115514	0.0240886
B3GNT4	UDP-GlcNAc:betaGal beta-1,3-N-acetylglucosaminyltransferase 4	1.66168	0.00780462	0.0173678
NADK2	NAD kinase 2, mitochondrial	1.66132	0.00108766	0.00346674
ZNF467	zinc finger protein 467	1.661	0.000754988	0.00258562
ENTPD4	ectonucleoside triphosphate diphosphohydrolase 4	1.66081	0.000173706	0.000813606
PRDX2	peroxiredoxin 2	1.6592	1.1952e-05	0.000104521
BLOC1S1	biogenesis of lysosomal organelles complex 1 subunit 1	1.65905	0.000156155	0.000751148
OR8G2P	olfactory receptor family 8 subfamily G member 2 pseudogene	1.65847	0.000423377	0.00164591
TMEM179B	transmembrane protein 179B	1.65443	5.24155e-06	5.70346e-05
MPND	MPN domain containing	1.65367	5.64665e-05	0.000338035
JPT2	Jupiter microtubule associated homolog 2	1.65313	0.000125497	0.000634859
DPY30	dpy-30, histone methyltransferase complex regulatory subunit	1.65298	0.000389289	0.00153478
ATP5G1	ATP synthase, H+ transporting, mitochondrial Fo complex subunit C1 (subunit 9)	1.65298	0.000203568	0.000917494
BTBD2	BTB domain containing 2	1.65219	4.01925e-05	0.000260662
FNDC8	fibronectin type III domain containing 8	1.65199	0.00157066	0.00467518
SPAG8	sperm associated antigen 8	1.65191	0.00221173	0.00620339
PDXDC1	pyridoxal dependent decarboxylase domain containing 1	1.65022	0.00138502	0.00422453
CCNG2	cyclin G2	1.65003	0.000341656	0.00137934
SCNN1B	sodium channel epithelial 1 beta subunit	1.64965	0.00172131	0.00506135
NAA20	N(alpha)-acetyltransferase 20, NatB catalytic subunit	1.64814	3.74394e-05	0.000246946
CHMP2A	charged multivesicular body protein 2A	1.64709	2.99452e-06	3.8844e-05
RER1	retention in endoplasmic reticulum sorting receptor 1	1.64649	1.15039e-05	0.000101641
ROM1	retinal outer segment membrane protein 1	1.64407	0.00183127	0.00531644
CIDEB	cell death-inducing DFFA-like effector b	1.64361	0.000536943	0.001984
MRFAP1L1	Morf4 family associated protein 1 like 1	1.64303	0.000246063	0.00106815
ING4	inhibitor of growth family member 4	1.64251	0.000172083	0.000808958
ZNF688	zinc finger protein 688	1.64227	0.000386684	0.00152639
PCK2	phosphoenolpyruvate carboxykinase 2, mitochondrial	1.64221	6.83362e-05	0.000391727
PNPO	pyridoxamine 5'-phosphate oxidase	1.64116	0.00215859	0.00607825
NEURL2	neuralized E3 ubiquitin protein ligase 2	1.63941	0.00622105	0.0144374
BEST1	bestrophin 1	1.63906	0.00411459	0.0102677
C6orf120	chromosome 6 open reading frame 120	1.63758	0.000496665	0.00186253
C12orf76	chromosome 12 open reading frame 76	1.63723	0.0028938	0.00767777
STKLD1	serine/threonine kinase like domain containing 1	1.63607	0.000962014	0.00315
FAM151B	family with sequence similarity 151 member B	1.63586	0.0184457	0.0357191
STOX1	storkhead box 1	1.63484	0.0203798	0.0387612
CXorf40B	chromosome X open reading frame 40B	1.63451	8.99504e-05	0.000487526
TMEM80	transmembrane protein 80	1.63447	0.00244786	0.00671735
PRDX4	peroxiredoxin 4	1.63363	8.96075e-06	8.49022e-05
TNFRSF10C	TNF receptor superfamily member 10c	1.63334	0.00476818	0.011603
EME2	essential meiotic structure-specific endonuclease subunit 2	1.63315	0.00731053	0.0164827
SCARB1	scavenger receptor class B member 1	1.63165	0.00024893	0.0010778
SIL1	SIL1 nucleotide exchange factor	1.63142	1.25967e-05	0.000108438
SEMA3F	semaphorin 3F	1.63092	0.00455239	0.0111562
RAD51C	RAD51 paralog C	1.62931	8.10412e-05	0.000449882
OXCT2	3-oxoacid CoA-transferase 2	1.62807	0.00216956	0.00610512
P2RX7	purinergic receptor P2X 7	1.62741	0.00160225	0.00475817
GSTZ1	glutathione S-transferase zeta 1	1.62685	6.4451e-05	0.000375837
SLC2A8	solute carrier family 2 member 8	1.62627	0.000237875	0.0010387
BORCS8	BLOC-1 related complex subunit 8	1.62503	0.000275155	0.00116693
ABCB8	ATP binding cassette subfamily B member 8	1.62454	0.00038776	0.0015297
SLC25A14	solute carrier family 25 member 14	1.62405	0.000275487	0.00116757
SEM1	SEM1, 26S proteasome complex subunit	1.62371	0.00179934	0.00524703
CDK3	cyclin dependent kinase 3	1.62318	0.000618065	0.00220868
ENPP4	ectonucleotide pyrophosphatase/phosphodiesterase 4 (putative)	1.62273	0.000833361	0.00280903
RPL23	ribosomal protein L23	1.62025	0.000657799	0.00231902
TBC1D16	TBC1 domain family member 16	1.61979	0.00248458	0.0067963
POLR2J	RNA polymerase II subunit J	1.61809	0.00116659	0.0036688
SLC25A21	solute carrier family 25 member 21	1.61768	0.0068222	0.0155789
GJA9	gap junction protein alpha 9	1.61651	0.000607095	0.00217615
SFXN4	sideroflexin 4	1.6165	0.000257044	0.00110584
NDUFC1	NADH:ubiquinone oxidoreductase subunit C1	1.61622	0.00029518	0.00123471
UQCR11	ubiquinol-cytochrome c reductase, complex III subunit XI	1.61599	0.00153607	0.00459996
DHRS12	dehydrogenase/reductase 12	1.61396	0.000588789	0.00212312
FAM189A1	family with sequence similarity 189 member A1	1.61386	0.018683	0.036097
GRHL1	grainyhead like transcription factor 1	1.61265	0.0224062	0.0420247
SRP14	signal recognition particle 14	1.61252	1.75618e-05	0.000140374
TBL1XR1	transducin beta like 1 X-linked receptor 1	1.61247	0.00171096	0.00503553
BICD1	BICD cargo adaptor 1	1.61232	0.00272031	0.00730867
CXXC5	CXXC finger protein 5	1.6108	0.00040623	0.00159082
PMEL	premelanosome protein	1.61061	0.000474778	0.00179527
ITIH4	inter-alpha-trypsin inhibitor heavy chain family member 4	1.6102	0.00531845	0.0126775
TMEM222	transmembrane protein 222	1.60803	3.64547e-05	0.000242069
CARMIL2	capping protein regulator and myosin 1 linker 2	1.60788	0.00103125	0.00332263
LYRM1	LYR motif containing 1	1.60761	0.00033153	0.00135194
ZNF813	zinc finger protein 813	1.60701	0.014777	0.0296534
RGS2	regulator of G protein signaling 2	1.60689	0.0108308	0.0228394
DNLZ	DNL-type zinc finger	1.60623	0.000276573	0.00117101
MTRNR2L8	MT-RNR2-like 8	1.60621	0.000978355	0.00319291
FA2H	fatty acid 2-hydroxylase	1.6051	0.0154887	0.0308403
RNF187	ring finger protein 187	1.60437	0.000311375	0.00128818
ORMDL3	ORMDL sphingolipid biosynthesis regulator 3	1.60437	0.00038515	0.00152456
TSTD3	thiosulfate sulfurtransferase (rhodanese)-like domain containing 3	1.6042	0.000882218	0.00293973
SPTBN5	spectrin beta, non-erythrocytic 5	1.604	0.0044207	0.010898
SLC16A10	solute carrier family 16 member 10	1.60394	0.00154037	0.00460961
SPACA9	sperm acrosome associated 9	1.60379	0.0029957	0.00790942
ERI3	ERI1 exoribonuclease family member 3	1.60327	1.94742e-05	0.000150866
NEURL3	neuralized E3 ubiquitin protein ligase 3	1.60321	0.00394963	0.00993525
ANXA9	annexin A9	1.60294	0.0027895	0.00746436
FAIM	Fas apoptotic inhibitory molecule	1.602	0.000302145	0.00125485
TANC1	tetratricopeptide repeat, ankyrin repeat and coiled-coil containing 1	1.60179	0.00919345	0.0198668
TBC1D30	TBC1 domain family member 30	1.60114	0.00104463	0.00335625
CENPN	centromere protein N	1.60096	5.38138e-05	0.000325343
PAGR1	PAXIP1 associated glutamate rich protein 1	1.59981	3.05489e-05	0.000212533
FKBP4	FK506 binding protein 4	1.59952	0.000301263	0.00125362
SSH3	slingshot protein phosphatase 3	1.59944	0.00204027	0.00579726
DKKL1	dickkopf like acrosomal protein 1	1.59897	0.00254945	0.00693382
LRG1	leucine rich alpha-2-glycoprotein 1	1.59833	0.0253522	0.0466433
ZNHIT1	zinc finger HIT-type containing 1	1.59816	5.96533e-05	0.000353165
SGSM3	small G protein signaling modulator 3	1.59814	9.90914e-05	0.00052444
HSD17B10	hydroxysteroid 17-beta dehydrogenase 10	1.59776	1.1995e-05	0.000104754
TMEM129	transmembrane protein 129	1.59717	0.000340147	0.00137622
AP1S1	adaptor related protein complex 1 sigma 1 subunit	1.59675	1.97158e-05	0.000152217
CNDP2	carnosine dipeptidase 2	1.59659	0.000420452	0.00163702
EARS2	glutamyl-tRNA synthetase 2, mitochondrial	1.5959	0.00303665	0.00801258
SVIP	small VCP interacting protein	1.58969	0.00105652	0.00338682
TMEM218	transmembrane protein 218	1.58946	0.000672101	0.00235648
SPNS1	sphingolipid transporter 1 (putative)	1.58918	0.00010405	0.000545408
LITAF	lipopolysaccharide induced TNF factor	1.58767	0.000441378	0.00169941
TMEM249	transmembrane protein 249	1.58762	0.00510756	0.0122408
C14orf2	chromosome 14 open reading frame 2	1.5874	0.00130502	0.00401875
MMAB	methylmalonic aciduria (cobalamin deficiency) cblB type	1.58558	8.2018e-05	0.000454518
C6orf203	chromosome 6 open reading frame 203	1.58508	0.000742268	0.002552
TXNDC11	thioredoxin domain containing 11	1.58491	4.70225e-05	0.000294125
SUOX	sulfite oxidase	1.58489	0.00298537	0.00788863
TBKBP1	TBK1 binding protein 1	1.58477	0.00734499	0.0165459
WASF3	WAS protein family member 3	1.58428	0.0171609	0.0335555
RHOB	ras homolog family member B	1.58407	0.00114409	0.00360914
KREMEN2	kringle containing transmembrane protein 2	1.58373	0.00335636	0.0087005
ATP5D	ATP synthase, H+ transporting, mitochondrial F1 complex, delta subunit	1.58346	1.9616e-05	0.00015169
SH3TC1	SH3 domain and tetratricopeptide repeats 1	1.58253	0.00688276	0.0157004
NARFL	nuclear prelamin A recognition factor like	1.58242	0.000373733	0.00148716
FAM221A	family with sequence similarity 221 member A	1.58224	0.000685535	0.00239052
ZDHHC14	zinc finger DHHC-type containing 14	1.58111	0.000762214	0.0026062
NAGLU	N-acetyl-alpha-glucosaminidase	1.58108	0.000177443	0.000826284
TSPAN15	tetraspanin 15	1.58039	0.00018655	0.000858558
SLC2A11	solute carrier family 2 member 11	1.57974	0.000916467	0.00302866
PNCK	pregnancy up-regulated nonubiquitous CaM kinase	1.57934	0.00576421	0.0135612
CCDC126	coiled-coil domain containing 126	1.57907	0.00193906	0.00556016
CDK5R1	cyclin dependent kinase 5 regulatory subunit 1	1.57789	0.0230413	0.0430272
ACAP3	ArfGAP with coiled-coil, ankyrin repeat and PH domains 3	1.5773	0.000210027	0.000943383
TXNDC17	thioredoxin domain containing 17	1.57717	0.000253629	0.00109335
PIGS	phosphatidylinositol glycan anchor biosynthesis class S	1.57667	0.000605962	0.00217411
SIDT2	SID1 transmembrane family member 2	1.57622	0.00199818	0.00569658
C1orf131	chromosome 1 open reading frame 131	1.57531	0.00157208	0.00467832
DHRS11	dehydrogenase/reductase 11	1.57512	0.0104899	0.0222291
TMA7	translation machinery associated 7 homolog	1.57334	0.000919922	0.00303619
ATP6V1E2	ATPase H+ transporting V1 subunit E2	1.57317	0.0226756	0.0424431
TCTN1	tectonic family member 1	1.57304	3.57475e-05	0.000238981
AIFM1	apoptosis inducing factor mitochondria associated 1	1.57227	0.000301932	0.00125452
R3HCC1	R3H domain and coiled-coil containing 1	1.572	0.000141715	0.000695946
DNAJC4	DnaJ heat shock protein family (Hsp40) member C4	1.57136	5.23852e-05	0.000319416
ZBTB7B	zinc finger and BTB domain containing 7B	1.571	0.00504593	0.0121157
FAM229B	family with sequence similarity 229 member B	1.57015	0.0019542	0.00559609
NDUFA2	NADH:ubiquinone oxidoreductase subunit A2	1.5699	0.00102855	0.0033154
CD24	CD24 molecule	1.56967	0.0142469	0.0287561
SEPHS2	selenophosphate synthetase 2	1.56951	3.252e-05	0.000222674
ECHDC3	enoyl-CoA hydratase domain containing 3	1.56462	0.000118992	0.000608428
LOC391322	D-dopachrome tautomerase-like	1.56448	0.00238492	0.00658345
PMEPA1	prostate transmembrane protein, androgen induced 1	1.56393	0.00778048	0.0173231
TSC2	tuberous sclerosis 2	1.56347	2.81111e-05	0.00019991
PPP6R2	protein phosphatase 6 regulatory subunit 2	1.56265	8.42179e-05	0.000464103
GMPPB	GDP-mannose pyrophosphorylase B	1.56205	0.00023551	0.00103048
ZNF329	zinc finger protein 329	1.56155	0.0151259	0.0302448
TMEM208	transmembrane protein 208	1.56143	0.000582629	0.00210788
MORN2	MORN repeat containing 2	1.56078	0.000324952	0.00133189
SH3BGR	SH3 domain binding glutamate rich protein	1.56032	0.00114392	0.00360914
TIMM17B	translocase of inner mitochondrial membrane 17B	1.55973	0.000187354	0.0008614
COPRS	coordinator of PRMT5 and differentiation stimulator	1.55827	0.000150188	0.000727902
CETN2	centrin 2	1.55787	0.000197869	0.000897618
DCAKD	dephospho-CoA kinase domain containing	1.55755	0.00445596	0.0109617
ADAT3	adenosine deaminase, tRNA specific 3	1.55746	0.00623976	0.0144677
SNAPIN	SNAP associated protein	1.55696	0.000139787	0.00068868
DUSP23	dual specificity phosphatase 23	1.55611	0.003667	0.00935638
GMNN	geminin, DNA replication inhibitor	1.55574	7.50072e-05	0.000423443
MDK	midkine (neurite growth-promoting factor 2)	1.55531	0.0172336	0.0336822
SYNGR1	synaptogyrin 1	1.55426	0.0146852	0.0294784
ARID5A	AT-rich interaction domain 5A	1.55365	0.00140861	0.00428935
SSBP2	single stranded DNA binding protein 2	1.55194	0.00190192	0.00547326
RASSF2	Ras association domain family member 2	1.55121	0.00282465	0.00754162
USMG5	up-regulated during skeletal muscle growth 5 homolog (mouse)	1.54983	0.00112778	0.00356845
TMEM144	transmembrane protein 144	1.54959	0.0143613	0.0289461
FDXR	ferredoxin reductase	1.54881	0.000249634	0.00108012
ZNF454	zinc finger protein 454	1.5479	0.00134118	0.00411234
LBH	limb bud and heart development	1.54687	0.018906	0.0364143
EI24	EI24, autophagy associated transmembrane protein	1.54665	5.13141e-05	0.000313929
LONRF2	LON peptidase N-terminal domain and ring finger 2	1.54663	0.00288218	0.00765696
PPIL6	peptidylprolyl isomerase like 6	1.54662	0.0189669	0.0364971
VWA7	von Willebrand factor A domain containing 7	1.54522	0.00581526	0.0136591
TESK2	testis-specific kinase 2	1.54426	0.000761475	0.00260436
NEIL2	nei like DNA glycosylase 2	1.5442	0.000284024	0.00119624
DGAT2	diacylglycerol O-acyltransferase 2	1.54311	0.000873308	0.00291914
TMEM254	transmembrane protein 254	1.54291	0.000407831	0.00159417
CEMP1	cementum protein 1	1.54239	0.00495647	0.0119465
NREP	neuronal regeneration related protein	1.54183	0.00803292	0.0177895
ST20	suppressor of tumorigenicity 20	1.5418	0.0115733	0.0241146
RARB	retinoic acid receptor beta	1.54073	0.00252005	0.00686989
FMC1	formation of mitochondrial complex V assembly factor 1 homolog	1.54064	0.00153358	0.00459358
SLC39A4	solute carrier family 39 member 4	1.54049	1.40826e-05	0.000118392
MICALL2	MICAL like 2	1.54018	0.000549765	0.00202188
MIA3	MIA family member 3, ER export factor	1.53994	0.00538819	0.0128156
VPS51	VPS51, GARP complex subunit	1.53875	5.20103e-05	0.000317733
RBCK1	RANBP2-type and C3HC4-type zinc finger containing 1	1.53657	7.30026e-05	0.00041394
BEX1	brain expressed X-linked 1	1.53628	0.00644312	0.0148587
RAB6C	RAB6C, member RAS oncogene family	1.53533	0.0161164	0.0319065
ALDH6A1	aldehyde dehydrogenase 6 family member A1	1.53461	0.00374836	0.00951666
USE1	unconventional SNARE in the ER 1	1.53428	0.000565866	0.00206412
PBLD	phenazine biosynthesis like protein domain containing	1.53417	0.00755953	0.0169297
RPS2	ribosomal protein S2	1.53224	0.0018293	0.0053128
CCNG1	cyclin G1	1.53062	8.30572e-05	0.000458494
PTPN13	protein tyrosine phosphatase, non-receptor type 13	1.53029	0.01627	0.0321367
C7orf49	chromosome 7 open reading frame 49	1.52835	0.000174428	0.000816393
MOSPD3	motile sperm domain containing 3	1.52826	4.72946e-05	0.000295108
ACOT1	acyl-CoA thioesterase 1	1.52794	0.00633681	0.0146477
MYL5	myosin light chain 5	1.52771	0.0009826	0.00320106
ARL6IP4	ADP ribosylation factor like GTPase 6 interacting protein 4	1.52567	3.38906e-05	0.000229436
CMC2	C-X9-C motif containing 2	1.52474	0.00229121	0.00638469
CHRNE	cholinergic receptor nicotinic epsilon subunit	1.52454	0.00272711	0.00732386
AUH	AU RNA binding methylglutaconyl-CoA hydratase	1.52426	0.000442437	0.00170176
PPCS	phosphopantothenoylcysteine synthetase	1.52331	2.50315e-05	0.000181244
ADAL	adenosine deaminase like	1.52331	0.000485067	0.0018249
ALG14	ALG14, UDP-N-acetylglucosaminyltransferase subunit	1.52279	0.00226131	0.00631347
ZNF524	zinc finger protein 524	1.522	0.000135835	0.000673088
FAM13C	family with sequence similarity 13 member C	1.52175	0.0027285	0.00732608
ZDHHC21	zinc finger DHHC-type containing 21	1.52155	0.00578973	0.0136137
ZDHHC4	zinc finger DHHC-type containing 4	1.52075	6.11899e-05	0.000360094
NHLRC1	NHL repeat containing E3 ubiquitin protein ligase 1	1.51949	0.00188277	0.00543402
IZUMO4	IZUMO family member 4	1.51872	0.00322537	0.00841192
MRPL23	mitochondrial ribosomal protein L23	1.5177	0.000245036	0.00106488
NDUFS5	NADH:ubiquinone oxidoreductase subunit S5	1.51719	0.000133906	0.000666829
COPZ1	coatomer protein complex subunit zeta 1	1.51619	3.06867e-05	0.000213145
RHBDD3	rhomboid domain containing 3	1.51513	9.95071e-05	0.000526206
ETV2	ETS variant 2	1.51398	0.00327337	0.00852031
GABARAPL2	GABA type A receptor associated protein like 2	1.51283	0.000209082	0.000940174
VAMP5	vesicle associated membrane protein 5	1.51208	0.00957866	0.0206009
METTL27	methyltransferase like 27	1.50945	0.0010522	0.00337552
TRAPPC3	trafficking protein particle complex 3	1.50914	0.000184396	0.000851863
MRFAP1	Morf4 family associated protein 1	1.5074	8.56843e-05	0.000470164
BBIP1	BBSome interacting protein 1	1.50704	0.000481504	0.00181576
VMAC	vimentin type intermediate filament associated coiled-coil protein	1.50611	0.00111119	0.00352682
RBBP4	RB binding protein 4, chromatin remodeling factor	1.50523	0.00106063	0.00339662
WDR24	WD repeat domain 24	1.50522	0.000204915	0.000923054
CEP70	centrosomal protein 70	1.50318	0.000461339	0.00175519
UPK3B	uroplakin 3B	1.50261	0.00372919	0.00948113
ALDH1L1	aldehyde dehydrogenase 1 family member L1	1.50252	0.0264844	0.0483587
CYB5D2	cytochrome b5 domain containing 2	1.50241	0.00024205	0.00105406
PMPCA	peptidase, mitochondrial processing alpha subunit	1.50226	0.000826855	0.00279224
PIAS2	protein inhibitor of activated STAT 2	1.5015	0.000136605	0.000675862
NTHL1	nth like DNA glycosylase 1	1.50141	0.000301604	0.00125422
GALNT3	polypeptide N-acetylgalactosaminyltransferase 3	1.50119	0.00914559	0.0197878
PTK6	protein tyrosine kinase 6	-1.50008	0.00252968	0.00688883
SLC25A36	solute carrier family 25 member 36	-1.50103	0.00556221	0.0131653
ASB1	ankyrin repeat and SOCS box containing 1	-1.50143	9.31022e-05	0.000501431
BTAF1	B-TFIID TATA-box binding protein associated factor 1	-1.50153	0.0236783	0.0439545
CD83	CD83 molecule	-1.5019	0.00263461	0.00711818
PLOD3	procollagen-lysine,2-oxoglutarate 5-dioxygenase 3	-1.50256	0.000626547	0.00222967
STAG1	stromal antigen 1	-1.50308	0.00125098	0.00388122
MPHOSPH10	M-phase phosphoprotein 10	-1.50528	0.000480078	0.00181251
PHIP	pleckstrin homology domain interacting protein	-1.50531	0.0126278	0.026016
EIF5	eukaryotic translation initiation factor 5	-1.5055	0.00017298	0.000810801
MAP3K7	mitogen-activated protein kinase kinase kinase 7	-1.50557	0.000257336	0.00110598
CIC	capicua transcriptional repressor	-1.50562	0.0193003	0.0370719
DDX20	DEAD-box helicase 20	-1.50612	0.000180941	0.000839222
SGO1	shugoshin 1	-1.50663	0.00188437	0.00543543
EPC2	enhancer of polycomb homolog 2	-1.50677	0.00439923	0.0108524
NAA25	N(alpha)-acetyltransferase 25, NatB auxiliary subunit	-1.50783	0.00293136	0.0077635
LURAP1L	leucine rich adaptor protein 1 like	-1.50795	0.00899685	0.0195529
HASPIN	histone H3 associated protein kinase	-1.50797	0.00245972	0.00674343
ATXN2L	ataxin 2 like	-1.50856	0.0104591	0.0221821
PPP2R3A	protein phosphatase 2 regulatory subunit B''alpha	-1.50942	0.00485397	0.0117627
ICE1	interactor of little elongation complex ELL subunit 1	-1.50967	0.00176048	0.00515174
SOCS4	suppressor of cytokine signaling 4	-1.50997	0.00271846	0.00730522
OSGIN1	oxidative stress induced growth inhibitor 1	-1.51081	0.00750215	0.0168198
NFKBIA	NFKB inhibitor alpha	-1.51121	0.00453852	0.0111286
MC1R	melanocortin 1 receptor	-1.51151	0.00186839	0.00540585
RUFY1	RUN and FYVE domain containing 1	-1.51178	0.000132341	0.00066114
KCNAB2	potassium voltage-gated channel subfamily A regulatory beta subunit 2	-1.51193	0.0015488	0.00462944
NMNAT2	nicotinamide nucleotide adenylyltransferase 2	-1.51272	0.00676099	0.0154611
BAG3	BCL2 associated athanogene 3	-1.51297	0.00226509	0.00632126
BCL3	B-cell CLL/lymphoma 3	-1.51345	0.00238151	0.00657889
FAM199X	family with sequence similarity 199, X-linked	-1.51364	0.0116268	0.0242183
PJA2	praja ring finger ubiquitin ligase 2	-1.51572	0.00843079	0.0185108
MEIS3	Meis homeobox 3	-1.51597	0.00589438	0.0138117
EXO1	exonuclease 1	-1.51619	0.000622601	0.00221994
CEP120	centrosomal protein 120	-1.51685	0.00377478	0.00957015
ABCD4	ATP binding cassette subfamily D member 4	-1.51904	0.000155978	0.000750744
FBXO41	F-box protein 41	-1.51921	0.00687853	0.0156935
NUP214	nucleoporin 214	-1.52007	0.0102256	0.0217806
[truncated: 2,334 more rows]
