# Supplementary material for: The long non-coding RNA GHSROS reprograms prostate cancer cell lines toward a more aggressive phenotype
Source: bioRxiv preprint, doi:10.1101/682203, version 1 (2019-06-26)
Supplement: Supplementary Dataset 3 [file 682203_file04.xlsx]

## Sheet: dataset 3
GO term	Description	Count	%	Genes	Fold Enrichment	Fisher Exact P-value
GO:0016477	cell migration	296	12.6	DLC1, MEF2C, NOG, TUBB2B, PTGS2, EDN1, PTPN22, L1CAM, LPAR1, AMOTL1, NOV, S1PR1, CD44, CTGF, SEMA7A, CH25H, SERPINE1, CCBE1, ILK, PIK3CA, ADAM8, S100A2, PIK3CG, PTPRK, ROCK1, PTPRG, ROCK2, EFNB2, MYH9, SIRPA, VEGFC, SPAG9, NAV1, SERPINF1, KRT16, TACSTD2, F3, RGCC, STC1, LAMC2, HAS2, CDK5R2, GCNT2, SEMA5A, PROCR, RAC2, MACF1, NKX2-1, LAMB1, PRPF40A, PLAT, BMP4, COL18A1, SPNS2, BMP2, LGALS3, TGFBR1…	2	3.8e-34
GO:0051674	localization of cell	319	13.6	MEF2C, DLC1, NOG, TUBB2B, PTGS2, EDN1, PTPN22, L1CAM, LPAR1, AMOTL1, NOV, S1PR1, CD44, SERPINE2, CTGF, SEMA7A, CH25H, SERPINE1, CCBE1, ILK, PIK3CA, ADAM8, S100A2, PIK3CG, PTPRK, PLD1, ROCK1, PTPRG, ROCK2, EFNB2, MYH9, SIRPA, VEGFC, SPAG9, NAV1, SERPINF1, KRT16, TACSTD2, F3, CATSPER1, RGCC, STC1, LAMC2, HAS2, DNAH11, CDK5R2, PPP2R3A, GCNT2, SEMA5A, PROCR, RAC2, MACF1, NKX2-1, LAMB1, PRPF40A, PLAT,…	1.9	3.3e-33
GO:0048870	cell motility	319	13.6	MEF2C, DLC1, NOG, TUBB2B, PTGS2, EDN1, PTPN22, L1CAM, LPAR1, AMOTL1, NOV, S1PR1, CD44, SERPINE2, CTGF, SEMA7A, CH25H, SERPINE1, CCBE1, ILK, PIK3CA, ADAM8, S100A2, PIK3CG, PTPRK, PLD1, ROCK1, PTPRG, ROCK2, EFNB2, MYH9, SIRPA, VEGFC, SPAG9, NAV1, SERPINF1, KRT16, TACSTD2, F3, CATSPER1, RGCC, STC1, LAMC2, HAS2, DNAH11, CDK5R2, PPP2R3A, GCNT2, SEMA5A, PROCR, RAC2, MACF1, NKX2-1, LAMB1, PRPF40A, PLAT,…	1.9	3.3e-33
GO:0007155	cell adhesion	380	16.2	PVR, DLC1, IL6ST, FSTL3, PTPN22, PDLIM1, L1CAM, RANGAP1, EDIL3, RORA, KIFC3, NOV, MAP3K7, SHB, S1PR1, PICALM, CD44, SERPINE2, CTGF, SERPINE1, ILK, PIK3CA, COL12A1, AFDN, ADAM8, PIK3CG, PTPRK, KIF5B, ROCK1, PTPRG, ROCK2, EFNB2, LIG4, MYH9, SIRPA, PDCD1LG2, RND3, VEGFC, UNC13D, MELTF, CAMK4, DHX29, TACSTD2, KIAA1524, RGCC, NPTN, LAMC2, HAS2, PRDM1, TGFB1I1, GCNT2, PCDH20, ASAP1, ITGA10, HFE, HSPA1A…	1.8	7.2e-33
GO:0022610	biological adhesion	380	16.2	PVR, DLC1, IL6ST, FSTL3, PTPN22, PDLIM1, L1CAM, RANGAP1, EDIL3, RORA, KIFC3, NOV, MAP3K7, SHB, S1PR1, PICALM, CD44, SERPINE2, CTGF, SERPINE1, ILK, PIK3CA, COL12A1, AFDN, ADAM8, PIK3CG, PTPRK, KIF5B, ROCK1, PTPRG, ROCK2, EFNB2, LIG4, MYH9, SIRPA, PDCD1LG2, RND3, VEGFC, UNC13D, MELTF, CAMK4, DHX29, TACSTD2, KIAA1524, RGCC, NPTN, LAMC2, HAS2, PRDM1, TGFB1I1, GCNT2, PCDH20, ASAP1, ITGA10, HFE, HSPA1A…	1.8	1.6e-32
GO:0040011	locomotion	351	15	MEF2C, DLC1, NOG, TUBB2B, PTGS2, EDN1, PTPN22, L1CAM, LPAR1, AMOTL1, NOV, BDNF, S1PR1, CD44, SERPINE2, CTGF, SEMA7A, CH25H, CCR10, CCBE1, SERPINE1, ILK, PIK3CA, ADAM8, S100A2, PIK3CG, PTPRK, PLD1, KIF5B, ROCK1, PTPRG, ROCK2, EFNB2, MYH9, SIRPA, PLAUR, VEGFC, SPAG9, NAV1, SERPINF1, KRT16, TACSTD2, F3, CATSPER1, RGCC, STC1, LAMC2, HAS2, EXT1, DNAH11, CDK5R2, PPP2R3A, GCNT2, EPHB2, SEMA5A, PROCR, RA…	1.8	1.6e-32
GO:0051128	regulation of cellular component organization	478	20.4	MEF2C, DLC1, LTBP4, L1CAM, SERPINE2, CTGF, SERPINE1, ILK, OGT, GBP5, KIF5B, ROCK1, PTPRG, ROCK2, UGCG, ESPL1, LIG4, MYH9, PLAUR, UNC13D, MELTF, SERPINF1, FCHSD2, FCHSD1, PMP22, DCBLD2, KIAA1109, HFE, HSPA1A, ESM1, CDC42EP2, CDC42EP1, RAC2, OBSL1, CDC42EP3, PRPF40A, MKI67, TGFBR1, SPHK1, TGFBR2, ATM, GAS6, SHOX2, SYNE3, TCAF2, TCAF1, SMURF1, LIMA1, FOXA2, TRPV2, SYNJ1, WDR36, SMAP1, IL4R, IL1RAP, …	1.6	2.3e-32
GO:0006928	movement of cell or subcellular component	393	16.8	MEF2C, DLC1, KIFC1, TUBB2B, PTGS2, L1CAM, AMOTL1, KIFC3, SERPINE2, CTGF, CH25H, SERPINE1, ILK, PIK3CA, ADAM8, PIK3CG, PTPRK, KIF5B, ROCK1, ROCK2, PTPRG, MYH3, MYH9, SIRPA, PLAUR, SPAG9, SERPINF1, F3, MST1R, DNAH11, KIF4A, PPP2R3A, PROCR, RAC2, PRPF40A, SPNS2, TGFBR1, TGFBR2, SPHK1, GAS6, CYP7B1, SYNE2, KCNJ8, TCAF2, TCAF1, SMURF2, GTSE1, OFD1, FGF1, WDR35, CEACAM1, FMNL1, RAP2A, FMNL3, ZSWIM6, BB…	1.7	5.8e-32
GO:2000145	regulation of cell motility	209	8.9	DLC1, NOG, PTGS2, EDN1, PTPN22, LPAR1, AMOTL1, NOV, S1PR1, SERPINE2, SEMA7A, ILK, SERPINE1, CCBE1, ADAM8, PTPRK, ROCK1, PTPRG, ROCK2, VEGFC, SPAG9, SERPINF1, KRT16, TACSTD2, F3, RGCC, CATSPER1, STC1, HAS2, LAMC2, GCNT2, PPP2R3A, SEMA5A, MACF1, RAC2, NKX2-1, LAMB1, BMP4, COL18A1, BMP2, LGALS3, TGFBR1, SPHK1, TGFBR2, SMAD3, NCKAP1L, MCAM, ECM1, GAS6, EPHA2, NKX6-1, LAMA2, NOTCH1, SEMA6B, SYNE2, SRP…	2.3	5.1e-32
GO:0030334	regulation of cell migration	199	8.5	DLC1, NOG, PTGS2, EDN1, PTPN22, LPAR1, AMOTL1, NOV, S1PR1, SERPINE2, SEMA7A, ILK, SERPINE1, CCBE1, ADAM8, PTPRK, ROCK2, PTPRG, VEGFC, SPAG9, SERPINF1, TACSTD2, KRT16, F3, RGCC, HAS2, LAMC2, STC1, GCNT2, SEMA5A, MACF1, RAC2, NKX2-1, LAMB1, BMP4, COL18A1, BMP2, LGALS3, TGFBR1, SPHK1, TGFBR2, SMAD3, NCKAP1L, MCAM, ECM1, GAS6, EPHA2, NKX6-1, LAMA2, NOTCH1, SEMA6B, SYNE2, SRPX2, ETS1, LAMA5, TCAF2, SM…	2.3	5.9e-32
GO:0040012	regulation of locomotion	213	9.1	DLC1, NOG, PTGS2, EDN1, PTPN22, LPAR1, AMOTL1, NOV, S1PR1, SERPINE2, SEMA7A, ILK, SERPINE1, CCBE1, ADAM8, HTR1D, PTPRK, ROCK1, PTPRG, ROCK2, EFNB2, VEGFC, SPAG9, SERPINF1, KRT16, TACSTD2, F3, RGCC, CATSPER1, STC1, HAS2, LAMC2, GCNT2, PPP2R3A, SEMA5A, MACF1, RAC2, NKX2-1, LAMB1, BMP4, COL18A1, BMP2, LGALS3, TGFBR1, SPHK1, TGFBR2, SMAD3, NCKAP1L, MCAM, ECM1, GAS6, EPHA2, NKX6-1, LAMA2, NOTCH1, SEMA…	2.2	4.7e-31
GO:0001568	blood vessel development	175	7.5	MEF2C, GNA13, NOG, LTBP1, PTGS2, PDGFA, IL18, EDN1, CSPG4, LUZP1, RORA, TNFSF12, AQP1, TGFB1, TGFB2, NOV, NRCAM, SHB, S1PR1, ROBO1, CTGF, SERPINE1, TGFBI, CCBE1, ROBO4, PIK3CA, LOX, PDGFD, ADAM8, PIK3CG, SLC12A6, ROCK1, SOCS3, ROCK2, EFNB2, MFGE8, MYH9, STK4, AHR, JUNB, VEGFC, HHEX, ADAMTS6, MIB1, SERPINF1, F3, SIX1, RGCC, HAS2, NFE2L2, PRDM1, TNFAIP3, TNFAIP2, WNT5A, FGFR1, CAV1, TNFRSF12A, ITGB…	2.4	9.9e-31
GO:0009966	regulation of signal transduction	533	22.8	MEF2C, DLC1, TTI1, LTBP1, PEAR1, PTGS2, LTBP4, FSTL3, RORA, MAP3K7, MC1R, SERPINE2, CTGF, SERPINE1, ILK, GIT2, ARHGEF40, PIK3CA, OGT, ADAM8, PIK3CG, MED12, SIPA1L3, MECOM, PLAUR, SPAG9, F3, MST1R, TNFRSF6B, RALGPS2, PPP2R3A, GNAI2, GNAI1, ARHGEF28, NFKBIA, HFE, HSPA1A, ESM1, ARFGEF2, DUSP18, RAC2, HEXIM1, UBASH3B, DHX58, ASXL2, TGFBR1, SPHK1, ASXL1, TGFBR2, PIBF1, ATM, GAS6, SHOX2, CYP7B1, RGS4, …	1.6	2.6e-30
GO:0001944	vasculature development	181	7.7	MEF2C, GNA13, NOG, LTBP1, PTGS2, PDGFA, IL18, EDN1, CSPG4, LUZP1, RORA, TNFSF12, AQP1, TGFB1, TGFB2, NOV, NRCAM, SHB, S1PR1, ROBO1, CTGF, SERPINE1, TGFBI, CCBE1, ROBO4, PIK3CA, LOX, PDGFD, ADAM8, PIK3CG, SLC12A6, ROCK1, ROCK2, SOCS3, EFNB2, MFGE8, MYH9, STK4, AHR, JUNB, VEGFC, HHEX, ADAMTS6, MIB1, SERPINF1, F3, SIX1, RGCC, HAS2, NFE2L2, PRDM1, TNFAIP3, TNFAIP2, WNT5A, FGFR1, CAV1, TNFRSF12A, ITGB…	2.4	2.4e-30
GO:0051240	positive regulation of multicellular organismal process	326	13.9	MEF2C, SYT1, MEF2A, NOG, PDLIM7, PTGS2, IL6ST, FST, FAM20C, EDN1, PTPN22, L1CAM, AURKA, RORA, LPAR1, AMOTL1, AQP1, MAP3K7, SHB, BDNF, BRINP2, SERPINE2, ISG15, CTGF, SEMA7A, CCBE1, SERPINE1, ILK, CREB3L1, OGT, ADAM8, GBP5, ROCK2, EFNB2, CD40, LIG4, VEGFC, SPAG9, SERPINF1, F3, RGCC, NPTN, HAS2, PRDM1, TGFB1I1, GCNT2, GSDMD, HSPA1A, AFAP1L2, RIMS2, ARFGEF2, EPHB2, LIF, SEMA5A, MACF1, OBSL1, AGRN, NK…	1.8	1.6e-29
GO:0051270	regulation of cellular component movement	216	9.2	DLC1, NOG, PTGS2, EDN1, PTPN22, LPAR1, AMOTL1, NOV, S1PR1, SERPINE2, SEMA7A, ILK, SERPINE1, CCBE1, ADAM8, PTPRK, ROCK1, PTPRG, ROCK2, VEGFC, SPAG9, SERPINF1, KRT16, TACSTD2, F3, RGCC, CATSPER1, STC1, HAS2, LAMC2, DNAH11, GCNT2, PPP2R3A, SEMA5A, MACF1, RAC2, NKX2-1, LAMB1, BMP4, COL18A1, BMP2, LGALS3, TGFBR1, SPHK1, TGFBR2, SMAD3, NCKAP1L, MCAM, ECM1, NKX6-1, GAS6, EPHA2, LAMA2, NOTCH1, SEMA6B, SY…	2.1	1.5e-29
GO:0072359	circulatory system development	240	10.2	DLC1, MEF2C, NOG, MEF2A, LTBP1, PTGS2, EDN1, PDLIM3, LUZP1, RORA, AQP1, NOV, SHB, S1PR1, CTGF, SERPINE1, CCBE1, ILK, PIK3CA, ADAM8, PIK3CG, SLC12A6, ROCK1, ROCK2, EFNB2, MED12, MYH9, VEGFC, ADAMTS6, SERPINF1, F3, RGCC, HAS2, PRDM1, DNAH11, AKAP13, ESM1, EPHB2, SEMA5A, LIF, HEXIM1, OBSL1, VEZF1, NKX2-5, BMP4, KLF5, COL18A1, BMP2, TGFBR1, SPHK1, TGFBR2, ASXL1, PTPN14, SMAD3, SMYD2, MCAM, ECM1, ATM,…	2	1.1e-28
GO:0072358	cardiovascular system development	240	10.2	DLC1, MEF2C, NOG, MEF2A, LTBP1, PTGS2, EDN1, PDLIM3, LUZP1, RORA, AQP1, NOV, SHB, S1PR1, CTGF, SERPINE1, CCBE1, ILK, PIK3CA, ADAM8, PIK3CG, SLC12A6, ROCK1, ROCK2, EFNB2, MED12, MYH9, VEGFC, ADAMTS6, SERPINF1, F3, RGCC, HAS2, PRDM1, DNAH11, AKAP13, ESM1, EPHB2, SEMA5A, LIF, HEXIM1, OBSL1, VEZF1, NKX2-5, BMP4, KLF5, COL18A1, BMP2, TGFBR1, SPHK1, TGFBR2, ASXL1, PTPN14, SMAD3, SMYD2, MCAM, ECM1, ATM,…	2	1.1e-28
GO:0045595	regulation of cell differentiation	339	14.5	MEF2C, SYT1, MEF2A, NOG, PDLIM7, PTGS2, IL6ST, LTBP4, FAM20C, EDN1, FSTL3, L1CAM, AURKA, RORA, LPAR1, NOV, SHB, S1PR3, BDNF, BRINP2, SERPINE2, ISG15, CTGF, SEMA7A, ILK, AFDN, PTBP3, OGT, ADAM8, RARG, ROCK1, PTPRG, ROCK2, EFNB2, HMG20A, LIG4, ADAMTS7, VEGFC, SPAG9, ADAMTS9, UNC13D, MELTF, SERPINF1, CAMK4, TACSTD2, RGCC, NPTN, LNPK, HAS2, PRDM1, TGFB1I1, PMP22, KIAA1109, GCNT2, NFKBIA, ASAP1, AKAP1…	1.7	1.4e-27
GO:0007010	cytoskeleton organization	272	11.6	DLC1, MEF2C, KIFC1, MEF2A, TUBB2B, PDLIM7, TUBB2A, EDN1, PDLIM3, AURKA, AURKB, LPAR1, AQP1, S1PR1, CTGF, ILK, PLS3, ROCK1, ROCK2, MYH3, RAP1GDS1, SIPA1L3, ESPL1, MYH9, CEP152, DCTN1, RND3, NAV1, CEP350, KRT16, SGO1, TACSTD2, KRT15, SPAG4, RGCC, FCHSD2, PDE4DIP, FCHSD1, ADD3, KIF4A, C11ORF63, AKAP13, SEMA5A, CDC42EP2, CDC42EP1, RAC2, MACF1, OBSL1, CCSER2, AGRN, CDC42EP3, NKX2-5, PRPF40A, TGFBR1, A…	1.9	1.4e-27
GO:0035556	intracellular signal transduction	512	21.9	MEF2C, DLC1, TTI1, FHIT, MEF2A, PTGS2, PLEKHM1, RORA, AMOTL1, AMOTL2, MAP3K7, MC1R, SERPINE2, CTGF, ILK, ARHGEF40, PIK3CA, OGT, ADAM8, PIK3CG, ROCK1, ROCK2, SIPA1L3, GEM, MECOM, PLAUR, SPAG9, F3, MST1R, TNFRSF6B, RALGPS2, GNAI2, GNAI1, ARHGEF28, NFKBIA, HSPA1A, ARFGEF2, DUSP18, CDC42EP2, CDC42EP1, RAC2, HEXIM1, CDC42EP3, DHX58, TGFBR1, SPHK1, PIBF1, ATM, GAS6, RGS4, RGS7, RGS9, FGF5, SLC20A1, NUA…	1.5	1.9e-27
GO:0023051	regulation of signaling	573	24.5	MEF2C, DLC1, TTI1, LTBP1, PEAR1, PTGS2, REP15, LTBP4, FSTL3, RORA, MAP3K7, MC1R, SERPINE2, CTGF, ILK, SERPINE1, GIT2, ARHGEF40, PIK3CA, OGT, ADAM8, PIK3CG, KIF5B, MED12, SIPA1L3, MECOM, PLAUR, SPAG9, F3, MST1R, TNFRSF6B, RALGPS2, PPP2R3A, GNAI2, GNAI1, ARHGEF28, NFKBIA, HFE, HSPA1A, ESM1, ARFGEF2, DUSP18, RAC2, HEXIM1, UBASH3B, DHX58, ASXL2, TGFBR1, SPHK1, ASXL1, TGFBR2, PIBF1, ATM, GAS6, SHOX2, …	1.5	2.2e-27
GO:0010646	regulation of cell communication	564	24.1	MEF2C, DLC1, TTI1, LTBP1, PEAR1, PTGS2, LTBP4, FSTL3, RORA, MAP3K7, MC1R, SERPINE2, CTGF, SERPINE1, ILK, GIT2, ARHGEF40, PIK3CA, OGT, ADAM8, PIK3CG, KIF5B, MED12, SIPA1L3, MECOM, PLAUR, SPAG9, F3, MST1R, TNFRSF6B, RALGPS2, PPP2R3A, GNAI2, GNAI1, ARHGEF28, NFKBIA, HFE, HSPA1A, ESM1, ARFGEF2, DUSP18, RAC2, HEXIM1, UBASH3B, DHX58, ASXL2, TGFBR1, SPHK1, ASXL1, TGFBR2, PIBF1, ATM, GAS6, SHOX2, CYP7B1,…	1.5	5.9e-27
GO:0065009	regulation of molecular function	537	22.9	MEF2C, DLC1, XRCC4, RANGAP1, MAP3K7, SERPINE2, CTGF, SERPINE1, ILK, GIT2, ARHGEF40, PIK3CA, OGT, ADAM8, PIK3CG, KIF5B, ROCK1, ROCK2, SIPA1L3, PLAUR, SPAG9, SERPINF1, F3, PPP2R5E, MST1R, WFDC2, WFDC3, RALGPS2, PPP2R3A, DBNDD2, GNAI2, ARHGEF28, CACNB1, NFKBIA, HFE, HSPA1A, CACNB4, ARFGEF2, SERPINH1, ADAP1, DUSP18, PPP1R3C, CDC42EP2, CDC42EP1, DYNAP, RAC2, HEXIM1, UBASH3B, PPP1R3G, CDC42EP3, TGFBR1,…	1.5	5.9e-26
GO:0048514	blood vessel morphogenesis	149	6.4	GNA13, NOG, PTGS2, PDGFA, IL18, EDN1, CSPG4, RORA, TNFSF12, AQP1, TGFB1, TGFB2, NOV, NRCAM, SHB, S1PR1, CTGF, ROBO1, SERPINE1, TGFBI, CCBE1, ROBO4, PIK3CA, ADAM8, PIK3CG, SLC12A6, ROCK1, ROCK2, EFNB2, MFGE8, MYH9, STK4, JUNB, VEGFC, HHEX, SERPINF1, F3, SIX1, RGCC, HAS2, NFE2L2, PRDM1, TNFAIP3, TNFAIP2, WNT5A, FGFR1, CAV1, TNFRSF12A, ITGB2, ESM1, ELK3, ITGB3, ITGB1, EPHB2, SEMA5A, PTK2, ITGAV, HEG…	2.4	3.2e-26
GO:0051094	positive regulation of developmental process	257	11	MEF2C, SYT1, NOG, MEF2A, PTGS2, IL6ST, FST, FAM20C, EDN1, L1CAM, AURKA, LPAR1, AQP1, SHB, BDNF, BRINP2, SERPINE2, ISG15, SEMA7A, SERPINE1, CCBE1, ILK, OGT, ADAM8, PLD6, EFNB2, CD40, LIG4, VEGFC, SPAG9, UNC13D, SERPINF1, F3, RGCC, NPTN, HAS2, TGFB1I1, PRDM1, GCNT2, RIMS2, EPHB2, SEMA5A, LIF, MACF1, OBSL1, AGRN, NKX2-5, IL1RAPL1, PLAG1, BMP4, BMP2, LGALS3, LGALS1, TGFBR1, KLF10, SPHK1, TGFBR2, SMAD…	1.9	1.6e-25
GO:0048646	anatomical structure formation involved in morphogenesis	267	11.4	DLC1, MEF2C, NOG, MEF2A, PTGS2, FAM20C, EDN1, LUZP1, RORA, AQP1, NOV, SHB, S1PR1, CTGF, HTRA1, SERPINE1, CCBE1, ILK, RAB23, PIK3CA, CEP290, COL12A1, ADAM8, PIK3CG, SLC12A6, RARG, ROCK1, RRP7A, ROCK2, MYH3, EFNB2, MED12, MYH9, VEGFC, UNC13D, CEP162, SERPINF1, MCIDAS, F3, RGCC, CDK5R2, PPP2R3A, C11ORF63, CEP164, ESM1, EPHB2, SEMA5A, LAMB3, NKX2-1, OBSL1, VEZF1, LAMB1, NKX2-5, BMP4, KLF5, COL18A1, B…	1.8	2.5e-25
GO:2000026	regulation of multicellular organismal development	358	15.3	MEF2C, SYT1, NOG, PTGS2, IL6ST, FST, FAM20C, EDN1, FSTL3, L1CAM, LPAR1, AQP1, S1PR3, SHB, BDNF, S1PR1, BRINP2, SERPINE2, ISG15, CTGF, SEMA7A, CCBE1, SERPINE1, ILK, AFDN, OGT, ADAM8, RARG, ROCK1, PTPRG, ROCK2, EFNB2, MED12, HMG20A, CD40, LIG4, ADAMTS7, SPAG9, VEGFC, SERPINF1, CAMK4, TACSTD2, F3, RGCC, NPTN, LNPK, PRDM1, TGFB1I1, PMP22, KIAA1109, PPP2R3A, GCNT2, NFKBIA, ASAP1, RIMS2, EPHB2, LIF, SE…	1.7	1.3e-24
GO:0032989	cellular component morphogenesis	292	12.5	MEF2C, DLC1, S100A4, SYT1, NOG, S100A6, MEF2A, EDN1, L1CAM, AURKA, LPAR1, BDNF, PICALM, SEMA7A, PLOD3, FOXF2, ILK, RAB23, CEP290, ADAM8, ROCK1, KIF5B, MYH3, EFNB2, NKX2-8, SIPA1L3, MYH9, FARP1, UNC13D, VSIG1, CEP162, MELTF, TACSTD2, MCIDAS, RGCC, STC1, HAS2, TGFB1I1, EXT1, GCNT2, C11ORF63, ASAP1, CEP164, RIMS2, EPHB2, LIF, SEMA5A, CDC42EP2, CDC42EP1, MACF1, NKX2-1, OBSL1, LAMB1, CDC42EP3, NKX2-5,…	1.8	3.6e-24
GO:0001525	angiogenesis	128	5.5	GNA13, PTGS2, PDGFA, IL18, EDN1, CSPG4, TNFSF12, RORA, AQP1, TGFB2, NOV, NRCAM, SHB, S1PR1, CTGF, ROBO1, TGFBI, CCBE1, SERPINE1, ROBO4, PIK3CA, ADAM8, PIK3CG, SLC12A6, ROCK1, ROCK2, EFNB2, MFGE8, MYH9, STK4, VEGFC, HHEX, SERPINF1, F3, RGCC, NFE2L2, TNFAIP3, TNFAIP2, WNT5A, FGFR1, CAV1, TNFRSF12A, ITGB2, ITGB3, ELK3, ESM1, ITGB1, EPHB2, SEMA5A, PTK2, ITGAV, VEZF1, PLXND1, RUNX1, ANGPTL4, FN1, COL1…	2.5	1.4e-23
GO:0070887	cellular response to chemical stimulus	494	21.1	MEF2C, XRCC4, MEF2A, LTBP1, PTGS2, LTBP2, OSMR, LTBP4, FSTL3, FSTL1, RANGAP1, RORA, ISG20, MAP3K7, ISG15, RAE1, CTGF, CH25H, CCR10, SERPINE1, ILK, PIK3CA, OGT, ADAM8, PIK3CG, PTPRK, GBP5, KIF5B, ROCK2, MED12, LIG4, ADAMTS7, NPC1, SERPINF1, F3, MST1R, TNFRSF6B, GNAI2, GNAI1, NFKBIA, HFE, HSPA1A, SLC29A1, DYNAP, RAC2, TGFBR1, KLF10, SPHK1, TGFBR2, GAS6, CYP7B1, SMURF2, SMURF1, CREBRF, BACH1, FGF5, …	1.5	4.1e-23
GO:0000902	cell morphogenesis	275	11.7	DLC1, S100A4, MEF2C, SYT1, NOG, S100A6, MEF2A, L1CAM, AURKA, LPAR1, BDNF, PICALM, SEMA7A, PLOD3, FOXF2, ILK, RAB23, CEP290, ADAM8, ROCK1, KIF5B, EFNB2, NKX2-8, SIPA1L3, MYH9, FARP1, UNC13D, CEP162, VSIG1, MELTF, TACSTD2, MCIDAS, RGCC, STC1, HAS2, TGFB1I1, EXT1, GCNT2, C11ORF63, ASAP1, CEP164, RIMS2, EPHB2, LIF, SEMA5A, CDC42EP2, CDC42EP1, MACF1, NKX2-1, OBSL1, LAMB1, CDC42EP3, IL1RAPL1, PRPF40A, …	1.8	5.6e-23
GO:0007166	cell surface receptor signaling pathway	495	21.1	MEF2C, LTBP1, PEAR1, LTBP2, OSMR, LTBP4, FSTL3, FSTL1, AMOTL1, AMOTL2, ISG20, MAP3K7, ISG15, SERPINE2, CTGF, CCR10, SERPINE1, ILK, PIK3CA, ADAM8, PTPRK, NCF2, ROCK1, PTPRG, ROCK2, MED12, GEM, MYH9, PLAUR, F3, MST1R, TNFRSF6B, PPP2R3A, GNAI2, ARHGEF28, NFKBIA, HFE, HSPA1A, ESM1, ADAP1, SLC29A1, TGFBR1, KLF10, SPHK1, TGFBR2, GAS6, SHOX2, SMURF2, AREG, SMURF1, CREBRF, FGF5, LATS2, SRPX, IL4R, IL1RAP…	1.5	1.4e-22
GO:0048585	negative regulation of response to stimulus	295	12.6	DLC1, NOG, PEAR1, LTBP1, IL6ST, FST, EDN1, FSTL3, PTPN22, RORA, NOV, CD44, SERPINE2, VPS13C, HTRA1, SEMA7A, SERPINE1, CREB3L1, HTRA3, CRY1, TRABD2A, MED12, UBR2, OPTN, MECOM, TANK, PLAUR, SERPINF1, PRDM1, TGFB1I1, PPP2R3A, NFKBIA, HFE, HSPA1A, LIF, SEMA5A, DUSP18, UBASH3B, NKX2-1, NKX2-5, DHX58, PLAT, BMP4, BMP2, LGALS3, IL1RL1, TGFBR1, TGFBR2, ASXL1, SMAD3, PIBF1, ECM1, ATM, EPHA2, GAS6, EPHA4, …	1.7	1.3e-22
GO:0045597	positive regulation of cell differentiation	206	8.8	MEF2C, SYT1, MEF2A, PDLIM7, PTGS2, IL6ST, FAM20C, EDN1, AURKA, L1CAM, LPAR1, SHB, BDNF, BRINP2, SERPINE2, ISG15, CTGF, SEMA7A, ILK, OGT, ADAM8, EFNB2, LIG4, VEGFC, SPAG9, ADAMTS9, UNC13D, SERPINF1, TACSTD2, RGCC, NPTN, HAS2, TGFB1I1, PRDM1, GCNT2, RIMS2, EPHB2, SEMA5A, LIF, MACF1, OBSL1, IL1RAPL1, NKX2-5, BMP4, KLF5, ASXL2, PLAG1, BMP2, LGALS3, TGFBR1, KLF10, LGALS1, TGFBR2, SMAD3, S100A10, NCKAP…	1.9	1.4e-22
GO:0048468	cell development	389	16.6	MEF2C, MEF2A, L1CAM, SERPINE2, FOXF2, ILK, PTBP3, PTPRK, KIF5B, ROCK1, ROCK2, PTPRG, MYH3, MED12, HMG20A, SIPA1L3, LIG4, MYH9, SPAG9, UNC13D, MELTF, SERPINF1, PMP22, SERPINH1, OBSL1, VEZF1, TGFBR1, TGFBR2, ATM, SHOX2, AREG, SMURF1, ZNF488, FOXA2, TRPV2, SYNJ1, LATS2, WDR36, IL1RAP, QKI, RAP2A, ARHGEF2, ARHGEF1, ZSWIM6, NECTIN3, FLNC, FLNB, MYADM, NDNF, FLNA, ARHGEF10, SRPK1, FMN1, INHBA, EREG, GN…	1.6	1.8e-22
GO:1902531	regulation of intracellular signal transduction	348	14.9	MEF2C, S100A4, DLC1, TTI1, PTGS2, IL6ST, EDN1, PTPN22, AURKA, AURKB, RORA, LPAR1, NOV, MAP3K7, CD44, SERPINE2, MC1R, CTGF, SEMA7A, ILK, PIK3CA, ARHGEF40, CREB3L1, PELI2, OGT, ADAM8, PIK3CG, SIPA1L3, UBR2, OPTN, CD40, MECOM, FARP1, TANK, PLAUR, SPAG9, F3, NPTN, MST1R, FBXL2, TNFRSF6B, RALGPS2, GCNT2, GNAI2, GNAI1, ARHGEF28, AKAP12, NFKBIA, AKAP13, MYO9B, HSPA1A, ARFGEF2, MYO9A, LIF, SEMA5A, DUSP18…	1.6	5.1e-22
GO:0030029	actin filament-based process	174	7.4	DLC1, MEF2C, MEF2A, PDLIM7, PDGFA, EDN1, PDLIM3, ANKRD1, LPAR1, AQP1, ITPKA, TGFB1, TGFB2, S1PR1, ANK2, CTGF, ILK, PDE4B, PLS3, ROCK1, ACTN4, BST2, ROCK2, MYH3, RAP1GDS1, ACTN1, TMSB10, ACTN2, PDE4D, SIX4, MYH9, RND3, TNNT1, TACSTD2, RGCC, FCHSD2, OPHN1, STC1, PDE4DIP, FCHSD1, PAM, CAV1, DIAPH2, DIAPH3, AKAP13, MYO9B, ITGB1, SEMA5A, CORO2B, CDC42EP2, DOCK2, CDC42EP1, RAC2, OBSL1, FGD6, CDC42EP3, …	2.1	6.6e-22
GO:0030036	actin cytoskeleton organization	151	6.4	DLC1, MEF2C, MEF2A, PDLIM7, PDGFA, EDN1, PDLIM3, ANKRD1, LPAR1, AQP1, ITPKA, TGFB1, S1PR1, CTGF, PLS3, ROCK1, ACTN4, ROCK2, MYH3, RAP1GDS1, ACTN1, TMSB10, ACTN2, SIX4, MYH9, RND3, TACSTD2, RGCC, FCHSD2, OPHN1, PDE4DIP, FCHSD1, DIAPH2, DIAPH3, AKAP13, ITGB1, SEMA5A, CORO2B, CDC42EP2, DOCK2, CDC42EP1, RAC2, OBSL1, FGD6, CDC42EP3, NKX2-5, ARHGDIB, PHACTR1, MYO1B, TGFBR1, S100A10, SMAD3, NCKAP1L, ALM…	2.2	1.7e-21
GO:0050790	regulation of catalytic activity	443	18.9	MEF2C, DLC1, XRCC4, RANGAP1, MAP3K7, SERPINE2, CTGF, SERPINE1, ILK, GIT2, PIK3CA, ARHGEF40, OGT, ADAM8, PIK3CG, ROCK1, ROCK2, SIPA1L3, PLAUR, SPAG9, SERPINF1, F3, PPP2R5E, MST1R, WFDC2, WFDC3, RALGPS2, PPP2R3A, DBNDD2, GNAI2, ARHGEF28, HSPA1A, ARFGEF2, SERPINH1, ADAP1, DUSP18, PPP1R3C, CDC42EP2, CDC42EP1, DYNAP, RAC2, HEXIM1, UBASH3B, PPP1R3G, CDC42EP3, TGFBR1, TGFBR2, PIBF1, ATM, GAS6, UBA2, RGS…	1.5	3.5e-21
GO:0071310	cellular response to organic substance	415	17.7	MEF2C, LTBP1, PTGS2, LTBP2, OSMR, LTBP4, FSTL3, FSTL1, RANGAP1, RORA, ISG20, MAP3K7, ISG15, CTGF, RAE1, SERPINE1, ILK, CCR10, PIK3CA, OGT, PIK3CG, PTPRK, GBP5, KIF5B, ROCK2, MED12, ADAMTS7, NPC1, SERPINF1, F3, MST1R, TNFRSF6B, GNAI1, HFE, NFKBIA, HSPA1A, SLC29A1, DYNAP, KLF10, TGFBR1, TGFBR2, SPHK1, GAS6, CYP7B1, SMURF2, SMURF1, CREBRF, FGF5, LDLR, LATS2, NOD1, IL4R, IL1RAP, FGF1, SIK1, ERRFI1, C…	1.5	1.4e-20
GO:0051336	regulation of hydrolase activity	283	12.1	DLC1, MEF2C, RAB3GAP2, RANGAP1, LPAR1, AQP1, PICALM, S1PR1, CD44, SERPINE2, CTGF, SERPINE1, GIT2, ARHGEF40, AFDN, RAPGEF4, PI16, WFDC10B, ROCK1, ROCK2, RAP1GDS1, SIPA1L3, CD40, FARP1, TANK, PLAUR, UHRF1, SERPINF1, F3, TBC1D8B, WFDC2, WFDC3, RALGPS2, ARHGEF28, OAS3, ASAP2, ASAP1, AKAP13, OAS1, HSPA1A, MYO9B, PXK, ARFGEF2, MYO9A, SERPINH1, ADAP1, CDC42EP2, CDC42EP1, AGRN, CDC42EP3, BMP2, TRIO, SMAD…	1.7	1.6e-20
GO:0030198	extracellular matrix organization	106	4.5	LTBP2, PDGFA, MMP9, MMP1, TGFB1, TGFB2, CD44, HTRA1, CTGF, PLOD3, ILK, FOXF2, TGFBI, SERPINE1, COL12A1, CREB3L1, LOX, ADAM8, MATN3, OLFML2B, OLFML2A, MELTF, RGCC, HAS2, LAMC2, MFAP2, ITGB4, ITGA10, ITGB2, ITGB3, TIMP2, SOX9, SERPINH1, ITGB1, ABI3BP, TIMP1, PTK2, LAMB3, ERO1A, ITGB8, ITGAV, AGRN, LAMB1, FN1, COL18A1, TGFBR1, MYO1E, ITGA1, CCDC80, SMAD3, ITGA2, ITGA3, FURIN, GAS6, ATP7A, LAMA2, NOT…	2.5	1.3e-20
GO:0043062	extracellular structure organization	106	4.5	LTBP2, PDGFA, MMP9, MMP1, TGFB1, TGFB2, CD44, HTRA1, CTGF, PLOD3, ILK, FOXF2, TGFBI, SERPINE1, COL12A1, CREB3L1, LOX, ADAM8, MATN3, OLFML2B, OLFML2A, MELTF, RGCC, HAS2, LAMC2, MFAP2, ITGB4, ITGA10, ITGB2, ITGB3, TIMP2, SOX9, SERPINH1, ITGB1, ABI3BP, TIMP1, PTK2, LAMB3, ERO1A, ITGB8, ITGAV, AGRN, LAMB1, FN1, COL18A1, TGFBR1, MYO1E, ITGA1, CCDC80, SMAD3, ITGA2, ITGA3, FURIN, GAS6, ATP7A, LAMA2, NOT…	2.5	1.7e-20
GO:0022603	regulation of anatomical structure morphogenesis	234	10	DLC1, MEF2C, SYT1, NOG, PTGS2, EDN1, L1CAM, LPAR1, AQP1, BDNF, SEMA7A, SERPINE1, CCBE1, ILK, ROCK1, PLD6, ROCK2, EFNB2, MED12, MYH9, VEGFC, UNC13D, MELTF, SERPINF1, TACSTD2, F3, RGCC, HAS2, TGFB1I1, PPP2R3A, GCNT2, AKAP13, RIMS2, EPHB2, SEMA5A, LIF, CDC42EP2, CDC42EP1, MACF1, NKX2-1, OBSL1, CDC42EP3, IL1RAPL1, PRPF40A, BMP4, BMP2, TGFBR1, SPHK1, TGFBR2, SMAD3, S100A10, CELSR1, ECM1, NKX6-1, EPHA2…	1.8	7.9e-20
GO:0030335	positive regulation of cell migration	117	5	PTGS2, PDGFA, MMP9, EDN1, LPAR1, AMOTL1, TGFB1, IQGAP1, TGFB2, DAB2, S1PR1, TIAM1, GATA3, SEMA7A, ILK, CCBE1, SERPINE1, PDGFC, PDGFD, ADAM8, EGFR, IRS2, ACTN4, ROCK2, VEGFC, SPAG9, F3, HAS2, LAMC2, NFE2L2, WNT5A, FGFR1, GCNT2, WNT5B, ITGB3, SOX9, SEMA5A, PTK2, RAC2, ITGAV, LAMB1, FN1, COL18A1, BMP4, BMP2, LGALS3, PODXL, TGFBR1, TGFBR2, MET, SPHK1, NCKAP1L, SMAD3, ITGA2, ITGA3, MCAM, DOCK5, GAS6, …	2.4	6.6e-20
GO:0098609	cell-cell adhesion	252	10.8	PVR, IL6ST, FSTL3, PTPN22, PDLIM1, RANGAP1, RORA, KIFC3, NOV, MAP3K7, SHB, PICALM, CD44, SERPINE2, ILK, PIK3CA, AFDN, ADAM8, PIK3CG, ROCK1, KIF5B, EFNB2, LIG4, MYH9, PDCD1LG2, DHX29, CAMK4, TACSTD2, KIAA1524, RGCC, NPTN, HAS2, PRDM1, GCNT2, PCDH20, ASAP1, HFE, HSPA1A, CDC42EP1, RAC2, MACF1, UBASH3B, LAMB1, IL1RAPL1, BMP4, BMP2, PELI1, LGALS3, LGALS1, TGFBR2, PPFIBP1, SMAD3, NCKAP1L, CELSR1, EPHA2…	1.7	1.3e-19
GO:1902589	single-organism organelle organization	323	13.8	MEF2C, DLC1, SYT1, KIFC1, MEF2A, PDLIM7, EDN1, PDLIM3, RANGAP1, AURKA, AURKB, LPAR1, AQP1, PICALM, S1PR1, VPS13C, CTGF, INCENP, RAB23, CEP290, PLS3, STAG1, KIF5B, ROCK1, PLD6, ROCK2, MYH3, RAP1GDS1, ESPL1, OPTN, MYH9, CEP152, DCTN1, RND3, CEP162, NAV1, SGO2, CEP350, KRT16, SGO1, TACSTD2, SPAG4, MCIDAS, RGCC, FCHSD2, PDE4DIP, FCHSD1, KIF4A, C11ORF63, AHCTF1, AKAP13, CEP164, HSPA1A, SEMA5A, CDC42EP…	1.6	1.7e-19
GO:0009968	negative regulation of signal transduction	238	10.2	DLC1, NOG, PEAR1, LTBP1, IL6ST, FST, FSTL3, PTPN22, RORA, NOV, CD44, SERPINE2, HTRA1, SERPINE1, CREB3L1, HTRA3, CRY1, TRABD2A, MED12, UBR2, OPTN, MECOM, TANK, PLAUR, TGFB1I1, PRDM1, PPP2R3A, NFKBIA, HSPA1A, LIF, DUSP18, UBASH3B, NKX2-1, NKX2-5, DHX58, BMP4, BMP2, LGALS3, IL1RL1, TGFBR1, TGFBR2, ASXL1, SMAD3, PIBF1, ECM1, ATM, EPHA2, GAS6, CYP7B1, NOTCH1, RGS4, RGS7, SMURF2, RGS9, SMURF1, ENG, KLF…	1.7	4.3e-19
GO:0060429	epithelium development	233	9.9	DLC1, MEF2C, NOG, FST, FAM20C, EDN1, LUZP1, S1PR3, S1PR1, SERPINE2, WNK4, PLOD3, FOXF2, ILK, CEP290, AFDN, RARG, ROCK1, ROCK2, EFNB2, MED12, SIPA1L3, VEGFC, VSIG1, TAGLN, KRT16, TACSTD2, MCIDAS, STC1, PRDM1, PPP2R3A, TDRD7, FAM212A, LIF, NKX2-1, VEZF1, NKX2-5, BMP4, KLF5, COL18A1, BMP2, LGALS3, TGFBR2, SMAD3, ALMS1, CELSR1, NKX6-1, ATM, EPHA2, CYP7B1, EPHA4, NOTCH1, LAMA5, SMURF2, SMURF1, AREG, K…	1.7	5e-19
GO:0009605	response to external stimulus	391	16.7	MEF2C, PTGS2, OSMR, FSTL1, L1CAM, RORA, ISG20, USP53, SERPINE2, ISG15, CH25H, SERPINE1, CCR10, OGT, ADAM8, PIK3CG, GBP5, KIF5B, PLAUR, UNC13D, SERPINF1, F3, MST1R, TNFRSF6B, GNAI2, HFE, NFKBIA, RAC2, UBASH3B, ARNTL2, DHX58, KLF10, TGFBR2, GAS6, CYP7B1, KCNJ8, FOXA2, LDLR, LXN, NOCT, AP1S2, NOD1, IL4R, SLC22A3, FGF1, SIK1, CEACAM1, BATF3, BATF2, STX2, FOSB, MMP14, GNAQ, IL12A, PARVA, CSF3, CSF2, C…	1.5	7.4e-19
GO:0010033	response to organic substance	501	21.4	MEF2C, LTBP1, LTBP2, PTGS2, OSMR, LTBP4, FSTL3, FSTL1, RANGAP1, RORA, ISG20, MAP3K7, ISG15, RAE1, CTGF, CCR10, SERPINE1, ILK, PIK3CA, OGT, PIK3CG, PTPRK, GBP5, KIF5B, ROCK2, MED12, ADAMTS7, NPC1, SERPINF1, F3, MST1R, TNFRSF6B, GNAI2, GNAI1, NFKBIA, HFE, HSPA1A, SERPINH1, SLC29A1, DYNAP, MKI67, TGFBR1, KLF10, SPHK1, ASXL1, TGFBR2, KCNK1, GAS6, CYP7B1, KCNJ8, SMURF2, AREG, SMURF1, CREBRF, FGF5, LDL…	1.4	8.3e-19
GO:2000147	positive regulation of cell motility	117	5	PTGS2, PDGFA, MMP9, EDN1, LPAR1, AMOTL1, TGFB1, IQGAP1, TGFB2, DAB2, S1PR1, TIAM1, GATA3, SEMA7A, ILK, CCBE1, SERPINE1, PDGFC, PDGFD, ADAM8, EGFR, IRS2, ACTN4, ROCK2, VEGFC, SPAG9, F3, HAS2, LAMC2, NFE2L2, WNT5A, FGFR1, GCNT2, WNT5B, ITGB3, SOX9, SEMA5A, PTK2, RAC2, ITGAV, LAMB1, FN1, COL18A1, BMP4, BMP2, LGALS3, PODXL, TGFBR1, TGFBR2, MET, SPHK1, NCKAP1L, SMAD3, ITGA2, ITGA3, MCAM, DOCK5, GAS6, …	2.3	1.3e-18
GO:0008283	cell proliferation	357	15.2	MEF2C, DLC1, S100A6, NOG, PTGS2, OSMR, IL6ST, EDN1, PTPN22, AURKB, RORA, CLK1, AQP1, HMGN5, ISG20, NOV, SHB, S1PR3, PICALM, S1PR1, SERPINE2, GAB2, CTGF, HTRA1, ILK, AFDN, PIK3CG, PTPRK, RARG, EFNB2, NKX2-8, PIM1, CD40, LIG4, MECOM, PDCD1LG2, VEGFC, UHRF1, UHRF2, SERPINF1, KRT16, TACSTD2, KIAA1524, F3, RGCC, STC1, LAMC2, HAS2, YME1L1, PRDM1, TGFB1I1, MST1R, PMP22, GCNT2, GNAI2, IFI30, ESM1, P3H2, …	1.5	2.3e-18
GO:0051130	positive regulation of cellular component organization	251	10.7	RAB3GAP2, SYT1, EDN1, L1CAM, AURKA, LPAR1, AURKB, BDNF, CTGF, SEMA7A, ILK, SERPINE1, OGT, GBP5, ROCK1, KIF5B, PLD6, ROCK2, TRABD2A, UGCG, ESPL1, LIG4, DCTN1, PLAUR, UNC13D, MELTF, SERPINF1, RGCC, NPTN, HAS2, TGFB1I1, GCNT2, HFE, RIMS2, EPHB2, SEMA5A, LIF, CDC42EP2, CDC42EP1, RAC2, MACF1, HNMT, OBSL1, AGRN, CDC42EP3, NKX2-5, IL1RAPL1, BMP2, TP53BP2, TGFBR1, TGFBR2, SMAD3, S100A10, NCKAP1L, ATM, EP…	1.7	2.2e-18
GO:0030155	regulation of cell adhesion	160	6.8	DLC1, IL6ST, IL18, FSTL3, PTPN22, LMO7, IL15, EDIL3, TGFB1, IQGAP1, TGFB2, MAP3K7, SHB, S1PR1, CD44, SERPINE2, GATA3, ILK, TGFBI, SERPINE1, PIK3CA, ADAM8, EBI3, PIK3CG, ACTN4, ROCK1, PTPRG, ROCK2, EFNB2, HLA-A, HLA-E, PDCD1LG2, VEGFC, UNC13D, MELTF, CAMK4, TACSTD2, RGCC, PDE5A, HAS2, PRDM1, GBP1, WNT5A, CAV1, GCNT2, HFE, HACD1, FXYD5, SOX9, ABI3BP, SEMA5A, PTK2, MACF1, RAC2, UBASH3B, ITGAV, TRAF6…	2	1.9e-18
GO:0042127	regulation of cell proliferation	309	13.2	MEF2C, DLC1, NOG, S100A6, PTGS2, OSMR, IL6ST, EDN1, PTPN22, AQP1, HMGN5, NOV, S1PR3, S1PR1, SERPINE2, GAB2, CTGF, HTRA1, ILK, AFDN, PTPRK, RARG, EFNB2, NKX2-8, CD40, LIG4, PDCD1LG2, VEGFC, MELTF, SERPINF1, TACSTD2, KIAA1524, F3, RGCC, LAMC2, HAS2, PRDM1, TGFB1I1, MST1R, PMP22, TNFRSF6B, GCNT2, GNAI2, NFKBIA, IFI30, ESM1, P3H2, LIF, SEMA5A, P3H3, DYNAP, RAC2, LAMB1, NKX2-5, PLAG1, KLF5, COL18A1, B…	1.6	3e-18
GO:0048729	tissue morphogenesis	156	6.7	DLC1, MEF2C, GNA13, NOG, PDGFA, BTRC, EDN1, LUZP1, ANKRD1, MTHFD1L, TGFB1, TGFB2, VCL, ACTG2, DAB2, S1PR1, TIAM1, GATA3, WNK4, PLOD3, ILK, FOXF2, CEP290, EGFR, RARG, SOCS3, EFNB2, MED12, SIX2, SIX4, STK4, VEGFC, HHEX, MIB1, KRT16, TACSTD2, SIX1, STC1, FRAS1, WNT5A, FGFR1, ITGB4, ITGB3, SOX9, ITGB1, LIF, FOXQ1, NKX2-1, HEG1, TRAF6, PLXND1, NKX2-5, BMP4, BMP2, TGFBR1, PODXL, TGFBR2, MET, NTN4, LIN7…	2	2.4e-18
GO:0023057	negative regulation of signaling	251	10.7	DLC1, NOG, PEAR1, LTBP1, PTGS2, IL6ST, FST, EDN1, FSTL3, PTPN22, RORA, NOV, CD44, SERPINE2, HTRA1, SERPINE1, CREB3L1, HTRA3, CRY1, TRABD2A, MED12, UBR2, OPTN, MECOM, TANK, PLAUR, TGFB1I1, PRDM1, PPP2R3A, GNAI2, GNAI1, NFKBIA, HSPA1A, LIF, DUSP18, UBASH3B, NKX2-1, NKX2-5, DHX58, BMP4, BMP2, LGALS3, IL1RL1, TGFBR1, TGFBR2, ASXL1, SMAD3, PIBF1, ECM1, ATM, EPHA2, GAS6, PTPN11, CYP7B1, NOTCH1, RGS4, R…	1.7	3.1e-18
GO:0040017	positive regulation of locomotion	119	5.1	PTGS2, PDGFA, MMP9, EDN1, LPAR1, AMOTL1, TGFB1, IQGAP1, TGFB2, DAB2, S1PR1, TIAM1, GATA3, SEMA7A, ILK, CCBE1, SERPINE1, PDGFC, PDGFD, ADAM8, EGFR, IRS2, ACTN4, ROCK2, VEGFC, SPAG9, F3, HAS2, LAMC2, NFE2L2, WNT5A, FGFR1, GCNT2, WNT5B, ITGB3, SOX9, SEMA5A, PTK2, RAC2, ITGAV, LAMB1, FN1, COL18A1, BMP4, BMP2, LGALS3, PODXL, TGFBR1, TGFBR2, MET, SPHK1, NCKAP1L, SMAD3, ITGA2, ITGA3, MCAM, DOCK5, GAS6, …	2.2	2.3e-18
GO:0031589	cell-substrate adhesion	96	4.1	DLC1, FERMT3, FERMT2, EDIL3, FER, SDC4, IQGAP1, VCL, CD96, CD44, SLK, HPSE, CTGF, TIAM1, SEMA3E, ILK, SERPINE1, ZYX, CYR61, KIF14, PTPRK, ACTN4, ROCK1, ROCK2, ACTN1, ACTN2, CDK6, MMP14, PRKCE, MYADM, NDNF, FLNA, PPM1F, FMN1, VEGFC, UNC13D, CRKL, MELTF, TACSTD2, HOXD3, HAS2, SGCE, GBP1, PARVA, GCNT2, EPDR1, TNFRSF12A, CSF1, PEAK1, ITGB4, ITGA10, ITGB2, HACD1, ITGB3, CCL28, ITGB1, ABI3BP, COL17A1, …	2.5	2.1e-18
GO:0044093	positive regulation of molecular function	352	15	MEF2C, DLC1, RAB3GAP2, XRCC4, ADCY7, EDN1, RANGAP1, AURKB, LPAR1, MAP3K7, BDNF, PICALM, S1PR1, CD44, CTGF, WNK4, ILK, GIT2, PIK3CA, ARHGEF40, AFDN, RAPGEF4, OGT, ADAM8, PIK3CG, KIF5B, PIM1, RAP1GDS1, SIPA1L3, CD40, FARP1, TANK, PLAUR, SPAG9, UHRF1, F3, RGCC, MST1R, TBC1D8B, RALGPS2, CDK5R2, GNAI2, ARHGEF28, ASAP2, NFKBIA, ASAP1, HFE, AKAP13, MYO9B, HSPA1A, AFAP1L2, ARFGEF2, MYO9A, ADAP1, CDC42EP2…	1.5	6.4e-18
GO:0010648	negative regulation of cell communication	249	10.6	DLC1, NOG, PEAR1, LTBP1, PTGS2, IL6ST, FST, EDN1, FSTL3, PTPN22, RORA, NOV, CD44, SERPINE2, HTRA1, SERPINE1, CREB3L1, HTRA3, CRY1, TRABD2A, MED12, UBR2, OPTN, MECOM, TANK, PLAUR, TGFB1I1, PRDM1, PPP2R3A, GNAI2, GNAI1, NFKBIA, HSPA1A, LIF, DUSP18, UBASH3B, NKX2-1, NKX2-5, DHX58, BMP4, BMP2, LGALS3, IL1RL1, TGFBR1, TGFBR2, ASXL1, SMAD3, PIBF1, ECM1, ATM, EPHA2, GAS6, PTPN11, CYP7B1, NOTCH1, RGS4, R…	1.7	7.8e-18
GO:0001667	ameboidal-type cell migration	98	4.2	PTGS2, MMP9, EDN1, TNFSF12, AMOTL1, TGFB1, TGFB2, NOV, ROBO1, SEMA7A, GATA3, CCBE1, ILK, PIK3CA, S100A2, ROCK2, PTPRG, EFNB2, MYH9, VEGFC, TNS1, SERPINF1, TACSTD2, KRT16, RGCC, HAS2, STC1, NFE2L2, WNT5A, FGFR1, ANLN, ITGB2, ITGB3, SOX9, ITGB1, TIMP1, SEMA5A, PTK2, PLXND1, ARHGDIB, BMP4, TGFBR1, TGFBR2, MET, ITGA2, ITGA3, DOCK5, EPHA2, PTPN11, CORO1C, NOTCH1, SEMA6B, SYNE2, SRPX2, LAMA5, ETS1, SMU…	2.4	5.7e-18
GO:0060284	regulation of cell development	194	8.3	MEF2C, SYT1, NOG, IL6ST, EDN1, AURKA, L1CAM, LPAR1, SHB, S1PR3, BDNF, BRINP2, SERPINE2, SEMA7A, ILK, AFDN, ROCK1, ROCK2, PTPRG, HMG20A, LIG4, VEGFC, SPAG9, UNC13D, SERPINF1, MELTF, TACSTD2, RGCC, NPTN, HAS2, TGFB1I1, PMP22, GCNT2, AKAP13, ASAP1, RIMS2, EPHB2, SEMA5A, LIF, MACF1, NKX2-1, OBSL1, IL1RAPL1, NKX2-5, BMP4, PLAG1, BMP2, TGFBR1, LGALS1, TGFBR2, SMAD3, S100A10, NKX6-1, SHOX2, EPHA4, SEMA6…	1.8	1.1e-17
GO:0051272	positive regulation of cellular component movement	117	5	PTGS2, PDGFA, MMP9, EDN1, LPAR1, AMOTL1, TGFB1, IQGAP1, TGFB2, DAB2, S1PR1, TIAM1, GATA3, SEMA7A, ILK, CCBE1, SERPINE1, PDGFC, PDGFD, ADAM8, EGFR, IRS2, ACTN4, ROCK2, VEGFC, SPAG9, F3, HAS2, LAMC2, NFE2L2, WNT5A, FGFR1, GCNT2, WNT5B, ITGB3, SOX9, SEMA5A, PTK2, RAC2, ITGAV, LAMB1, FN1, COL18A1, BMP4, BMP2, LGALS3, PODXL, TGFBR1, TGFBR2, MET, SPHK1, NCKAP1L, SMAD3, ITGA2, ITGA3, MCAM, DOCK5, GAS6, …	2.2	1.2e-17
GO:0002009	morphogenesis of an epithelium	135	5.8	MEF2C, DLC1, GNA13, NOG, PDGFA, BTRC, EDN1, LUZP1, TGFB1, MTHFD1L, TGFB2, VCL, DAB2, TIAM1, GATA3, WNK4, PLOD3, ILK, FOXF2, CEP290, EGFR, RARG, SOCS3, EFNB2, MED12, SIX2, SIX4, STK4, VEGFC, HHEX, MIB1, KRT16, TACSTD2, SIX1, FRAS1, WNT5A, FGFR1, SOX9, LIF, FOXQ1, NKX2-1, TRAF6, PLXND1, NKX2-5, BMP4, BMP2, PODXL, TGFBR2, MET, NTN4, SMAD3, LIN7C, ALMS1, TEAD2, CELSR1, EPHA2, PSMB8, PSMB9, ATP7A, CYP…	2.1	2.8e-17
GO:0022008	neurogenesis	288	12.3	MEF2C, SYT1, NOG, S100A6, MEF2A, TUBB2B, IL6ST, L1CAM, AURKA, RORA, LPAR1, BDNF, BRINP2, PICALM, S1PR1, SERPINE2, SEMA7A, ILK, CEP290, AFDN, PTPRK, KIF5B, PTPRG, EFNB2, NKX2-8, MED12, HMG20A, LIG4, FARP1, PRDM8, VEGFC, SPAG9, NAV1, SERPINF1, NPTN, PRDM1, PMP22, EXT1, CDK5R2, PPP2R3A, ASAP1, RIMS2, EPHB2, LIF, SEMA5A, MACF1, NKX2-1, OBSL1, AGRN, LAMB1, NKX2-5, IL1RAPL1, PLAG1, BMP4, KLF7, BMP2, LG…	1.6	1.6e-16
GO:0000904	cell morphogenesis involved in differentiation	175	7.5	S100A4, MEF2C, MEF2A, S100A6, NOG, PLXNA2, CRABP2, L1CAM, ITPKA, TGFB1, TGFB2, VCL, NRCAM, DAB2, BDNF, PICALM, ROBO1, TIAM1, GATA3, PLOD3, SEMA7A, ILK, FOXF2, RBFOX2, ROCK1, KIF5B, ACTN4, EFNB2, NKX2-8, SIX2, SIPA1L3, ACTN1, BASP1, MYH9, FARP1, VSIG1, UNC13D, MELTF, TACSTD2, RGCC, ANOS1, OPHN1, STC1, HAS2, TGFB1I1, SLITRK6, EXT1, LRRK2, SLITRK5, GBP1, WNT5A, PLXNC1, GCNT2, TNFRSF12A, PEAK1, ITGB3…	1.8	6.5e-17
GO:0007167	enzyme linked receptor protein signaling pathway	208	8.9	NOG, LTBP1, LTBP2, IL6ST, LTBP4, FST, FSTL3, FSTL1, NOV, MAP3K7, SHB, BDNF, GAB2, HTRA1, CTGF, CCBE1, ILK, PIK3CA, HTRA3, PTPRK, ROCK1, NCF2, PTPRG, ROCK2, EFNB2, PLAUR, VEGFC, F3, NPTN, MST1R, TGFB1I1, GCNT2, ARHGEF28, HFE, AFAP1L2, HSPA1A, ESM1, EPHB2, LIF, NKX2-1, NKX2-5, BMP4, RHBDF2, PLAT, BMP2, TGFBR1, KLF10, TGFBR2, TRIO, SMAD3, NCKAP1L, PTPN12, GAS6, EPHA2, NCKAP1, PTPN11, EPHA4, NOTCH1, …	1.7	2.2e-16
GO:0048699	generation of neurons	272	11.6	MEF2C, SYT1, NOG, S100A6, MEF2A, TUBB2B, IL6ST, L1CAM, AURKA, RORA, LPAR1, BDNF, PICALM, BRINP2, S1PR1, SERPINE2, SEMA7A, ILK, CEP290, AFDN, PTPRK, KIF5B, PTPRG, EFNB2, NKX2-8, HMG20A, LIG4, FARP1, VEGFC, SPAG9, NAV1, SERPINF1, NPTN, PRDM1, PMP22, EXT1, CDK5R2, PPP2R3A, ASAP1, RIMS2, EPHB2, SEMA5A, LIF, MACF1, NKX2-1, OBSL1, AGRN, LAMB1, NKX2-5, IL1RAPL1, PLAG1, BMP4, KLF7, BMP2, LGALS1, TGFBR1, …	1.6	3.9e-16
GO:0090130	tissue migration	78	3.3	NRP2, PTGS2, MMP9, EDN1, FERMT1, ZEB2, TNFSF12, AMOTL1, TGFB1, TGFB2, NOV, ACTG2, PKN3, ROBO1, GATA3, CCBE1, PIK3CA, SEMA3A, FGF1, LOXL2, CEACAM1, S100A2, PRKCA, SP100, PTPRG, ROCK2, EFNB2, PKN2, MYH9, PRKCE, SLIT2, PPM1F, VEGFC, SERPINF1, KRT16, TACSTD2, RGCC, HAS2, STC1, MCC, NFE2L2, WNT5A, FGFR1, ITGB2, ANLN, ITGB3, SOX9, ITGB1, STARD13, SEMA5A, PTK2, PLEKHG5, PRSS3, THBS1, PLXND1, SCG2, BMP4,…	2.6	2.7e-16
GO:0010631	epithelial cell migration	76	3.2	NRP2, PTGS2, MMP9, EDN1, FERMT1, ZEB2, TNFSF12, AMOTL1, TGFB1, TGFB2, NOV, PKN3, ROBO1, GATA3, CCBE1, PIK3CA, SEMA3A, FGF1, LOXL2, CEACAM1, S100A2, PRKCA, SP100, PTPRG, ROCK2, EFNB2, PKN2, MYH9, PRKCE, SLIT2, PPM1F, VEGFC, SERPINF1, KRT16, TACSTD2, RGCC, HAS2, STC1, MCC, NFE2L2, WNT5A, FGFR1, ITGB2, ANLN, ITGB3, SOX9, ITGB1, STARD13, SEMA5A, PTK2, PLEKHG5, PRSS3, THBS1, PLXND1, SCG2, BMP4, TGFBR1…	2.6	2.9e-16
GO:0022604	regulation of cell morphogenesis	141	6	DLC1, GNA13, SYT1, NOG, PLXNA2, CRABP2, L1CAM, LPAR1, ITPKA, TGFB1, TGFB2, NRCAM, BDNF, DAB2, TIAM1, ROBO1, SEMA7A, ILK, COCH, ACTN4, MYH9, TBC1D22A, UNC13D, MELTF, TACSTD2, RGCC, HAS2, TGFB1I1, LRRK2, GBP1, WNT5A, PLXNC1, GCNT2, TNFRSF12A, ITGB2, RIMS2, EPHB2, SEMA5A, LIF, PTK2, CDC42EP2, CDC42EP1, MACF1, OBSL1, NKX2-1, SKIL, PLXND1, FGD6, IL1RAPL1, CDC42EP3, PRPF40A, FN1, BMP2, CPNE5, ZMYM3, TG…	2	4.9e-16
GO:0090132	epithelium migration	76	3.2	NRP2, PTGS2, MMP9, EDN1, FERMT1, ZEB2, TNFSF12, AMOTL1, TGFB1, TGFB2, NOV, PKN3, ROBO1, GATA3, CCBE1, PIK3CA, SEMA3A, FGF1, LOXL2, CEACAM1, S100A2, PRKCA, SP100, PTPRG, ROCK2, EFNB2, PKN2, MYH9, PRKCE, SLIT2, PPM1F, VEGFC, SERPINF1, KRT16, TACSTD2, RGCC, HAS2, STC1, MCC, NFE2L2, WNT5A, FGFR1, ITGB2, ANLN, ITGB3, SOX9, ITGB1, STARD13, SEMA5A, PTK2, PLEKHG5, PRSS3, THBS1, PLXND1, SCG2, BMP4, TGFBR1…	2.6	5.1e-16
GO:0043085	positive regulation of catalytic activity	300	12.8	DLC1, MEF2C, RAB3GAP2, XRCC4, ADCY7, EDN1, RANGAP1, AURKB, LPAR1, MAP3K7, PICALM, S1PR1, CD44, CTGF, ILK, GIT2, PIK3CA, ARHGEF40, AFDN, RAPGEF4, OGT, ADAM8, PIK3CG, PIM1, RAP1GDS1, SIPA1L3, CD40, FARP1, TANK, SPAG9, UHRF1, F3, RGCC, MST1R, TBC1D8B, RALGPS2, CDK5R2, GNAI2, ARHGEF28, ASAP2, ASAP1, AKAP13, HSPA1A, AFAP1L2, MYO9B, ARFGEF2, MYO9A, ADAP1, CDC42EP2, CDC42EP1, DYNAP, PPP1R3G, AGRN, CDC42…	1.5	2.6e-15
GO:0001816	cytokine production	150	6.4	PTGS2, ZC3HAV1, IL6ST, IL18, TLR2, PTPN22, TLR4, IL15, RORA, TLR6, TGFB1, IL17RA, IL31RA, TGFB2, MAP3K7, NLRC5, S1PR3, ISG15, MC1R, GATA3, SEMA7A, CCBE1, PDE4B, SERPINE1, RABGEF1, ADAM8, AKIRIN2, EBI3, PIK3CG, GBP5, BST2, RELB, HLA-A, PDE4D, HLA-B, CD40, HLA-E, PDCD1LG2, CAMK4, RGCC, ASB1, PAEP, TNFAIP3, SSC5D, GBP1, WNT5A, FGFR1, IFIH1, ADORA2B, GSDMD, UBA7, HFE, AFAP1L2, HSPA1A, IGF2BP2, ABCA1,…	1.9	2.8e-15
GO:0009611	response to wounding	153	6.5	GNA13, NOG, GNA15, PDGFA, F13A1, EDN1, TLR4, AURKA, RANGAP1, TGFB1, TGFB2, VCL, NOV, DYSF, SERPINE2, CTGF, GATA3, ILK, FGFR1OP2, SERPINE1, PIK3CA, PDGFC, PDGFD, LOX, TFPI2, EGFR, PIK3CG, RCOR1, ACTN1, CD40, MYH9, PLAUR, HHEX, THBD, ANXA8L1, F3, LNPK, NFE2L2, TNFAIP3, DST, WNT5A, DCBLD2, CAV1, WNT5B, TNFRSF12A, ITGB4, ELK3, ITGB3, MYL9, TIMP1, PROCR, MACF1, RAC2, UBASH3B, AHNAK2, FN1, PLAT, MAFF, …	1.9	3e-15
GO:0048584	positive regulation of response to stimulus	370	15.8	PVR, MEF2C, S100A4, PTGS2, OSMR, IL6ST, EDN1, PTPN22, LPAR1, NOV, MAP3K7, CFP, SHB, BDNF, S1PR1, CD44, MC1R, GAB2, CTGF, SEMA7A, CCBE1, SERPINE1, ILK, CFH, PIK3CA, PELI2, ADAM8, PIK3CG, GBP5, KIF5B, CD40, TANK, PLAUR, SPAG9, VEGFC, F3, RGCC, NPTN, TGFB1I1, MST1R, TNFRSF6B, PPP2R3A, GCNT2, GNAI2, AKAP12, NFKBIA, AKAP13, HFE, HSPA1A, AFAP1L2, ESM1, RIMS2, LIF, SEMA5A, RAC2, MACF1, HEXIM1, DHX58, BM…	1.4	4.4e-15
GO:0008219	cell death	359	15.3	MEF2C, DLC1, FHIT, MEF2A, NOG, PNMA2, PTGS2, IL6ST, EDN1, AURKA, AURKB, LPAR1, AQP1, HMGN5, NOV, MAP3K7, SHB, USP53, BDNF, PICALM, CD44, CTGF, SERPINE1, ILK, PIK3CA, CREB3L1, OGT, ADAM8, PIK3CG, RARG, ROCK1, PTPRH, PIM1, ESPL1, OPTN, CD40, LIG4, MECOM, PLAUR, WDR92, NME4, NPC1, SERPINF1, F3, RGCC, PMP22, PNMA1, TNFRSF6B, GSDMD, STK17B, NFKBIA, AKAP13, HSPA1A, STK17A, SEMA5A, DYNAP, NKX2-5, COL18A…	1.5	5.2e-15
GO:0006468	protein phosphorylation	343	14.6	MEF2C, DLC1, FHIT, MEF2A, NOG, PNMA2, PTGS2, IL6ST, EDN1, AURKA, AURKB, LPAR1, AQP1, HMGN5, MAP3K7, SHB, USP53, BDNF, CD44, CTGF, SERPINE1, ILK, PIK3CA, CREB3L1, OGT, ADAM8, PIK3CG, RARG, ROCK1, PTPRH, PIM1, ESPL1, CD40, LIG4, MECOM, PLAUR, WDR92, NME4, F3, RGCC, PNMA1, TNFRSF6B, GSDMD, STK17B, NFKBIA, AKAP13, HSPA1A, STK17A, SEMA5A, DYNAP, NKX2-5, COL18A1, BMP4, BMP2, LGALS3, TP53BP2, LGALS1, TG…	1.5	5.7e-15
GO:0012501	programmed cell death	343	14.6	MEF2C, MEF2A, NOG, ADCY7, IL6ST, FAM20C, EDN1, PTPN22, AURKA, AURKB, LPAR1, CLK1, MAP3K7, SHB, CD44, CTGF, SEMA7A, WNK4, ILK, PIK3CA, PELI2, CRY1, ADAM8, PIK3CG, ROCK1, ROCK2, PIM1, CD40, DCAF1, MECOM, PLAUR, SPAG9, VEGFC, CAMK4, RGCC, NPTN, MST1R, TNFRSF6B, CDK5R2, DBNDD2, GCNT2, GNAI2, STK17B, AKAP13, HFE, AFAP1L2, CNTRL, STK17A, PXK, EPHB2, LIF, DUSP18, DYNAP, RAC2, UBASH3B, HEXIM1, BMP4, BMP2…	1.5	5.7e-15
GO:0001817	regulation of cytokine production	140	6	PTGS2, ZC3HAV1, IL6ST, IL18, TLR2, PTPN22, TLR4, IL15, RORA, TLR6, TGFB1, IQGAP1, IL17RA, TGFB2, MAP3K7, NLRC5, S1PR3, ISG15, MC1R, GATA3, SEMA7A, CCBE1, PDE4B, SERPINE1, RABGEF1, ADAM8, AKIRIN2, EBI3, GBP5, BST2, RELB, HLA-A, PDE4D, HLA-B, CD40, HLA-E, PDCD1LG2, RGCC, ASB1, PAEP, TNFAIP3, SSC5D, GBP1, WNT5A, FGFR1, IFIH1, ADORA2B, GSDMD, UBA7, HFE, AFAP1L2, HSPA1A, IGF2BP2, IGF2BP3, ARFGEF2, IRA…	1.9	4.2e-15
GO:0010720	positive regulation of cell development	123	5.3	MEF2C, SYT1, IL6ST, CRABP2, EDN1, TLR2, L1CAM, AURKA, ANKRD1, LPAR1, ITPKA, TGFB1, IQGAP1, TGFB2, SETX, NRCAM, BDNF, DAB2, BRINP2, SERPINE2, TIAM1, ROBO1, SEMA7A, ILK, NEGR1, ASPM, ENC1, LIG4, VEGFC, SPAG9, UNC13D, SERPINF1, HOXD3, RGCC, PDE5A, NPTN, CLIP1, HAS2, TGFB1I1, NFE2L2, WNT5A, FGFR1, GCNT2, TNFRSF12A, RIMS2, TIMP2, ZMYND8, EPHB2, SEMA5A, LIF, MACF1, PTK6, OBSL1, SKIL, IL1RAPL1, NKX2-5, …	2	4.8e-15
GO:0006935	chemotaxis	135	5.8	NOG, PDGFA, PLXNA2, EDN1, L1CAM, LPAR1, TGFB1, IL17RA, TGFB2, NOV, NRCAM, BDNF, S1PR1, TIAM1, ROBO1, GATA3, CH25H, SEMA7A, PDE4B, SERPINE1, CCR10, PDGFD, ADAM8, PIK3CG, PLD1, KIF5B, EFNB2, PDE4D, PLAUR, VEGFC, F3, ANOS1, OPHN1, EXT1, WNT5A, FGFR1, PLXNC1, ITGB2, ITGB3, EPHB2, SEMA5A, PTK2, DOCK2, RAC2, ITGAV, NKX2-1, B3GNT2, PLXND1, BMP4, KLF7, LGALS3, MET, NTN4, ITGA1, NCKAP1L, SMAD3, ITGA2, EPH…	1.9	6.9e-15
GO:0007399	nervous system development	389	16.6	MEF2C, DLC1, MEF2A, TUBB2B, L1CAM, RORA, MALL, SERPINE2, ILK, PTPRK, KIF5B, PTPRG, MED12, HMG20A, LIG4, SPAG9, SERPINF1, PMP22, PPP2R3A, FAM212A, OBSL1, TGFBR1, TGFBR2, SPHK1, ZNF521, ATM, GAS6, SHOX2, WDR62, AREG, RGS9, SMURF1, ZNF488, FGF5, FOXA2, TRPV2, SYNJ1, WDR36, HLX, SNPH, IL1RAP, QKI, RAP2A, ARHGEF2, ARHGEF1, PGAP1, ZSWIM6, MMP14, NDNF, ARHGEF10, FMN1, INHBA, GNAQ, NAB2, NAB1, C1QL1, GNB…	1.4	1e-14
GO:0042330	taxis	135	5.8	NOG, PDGFA, PLXNA2, EDN1, L1CAM, LPAR1, TGFB1, IL17RA, TGFB2, NOV, NRCAM, BDNF, S1PR1, TIAM1, ROBO1, GATA3, CH25H, SEMA7A, PDE4B, SERPINE1, CCR10, PDGFD, ADAM8, PIK3CG, PLD1, KIF5B, EFNB2, PDE4D, PLAUR, VEGFC, F3, ANOS1, OPHN1, EXT1, WNT5A, FGFR1, PLXNC1, ITGB2, ITGB3, EPHB2, SEMA5A, PTK2, DOCK2, RAC2, ITGAV, NKX2-1, B3GNT2, PLXND1, BMP4, KLF7, LGALS3, MET, NTN4, ITGA1, NCKAP1L, SMAD3, ITGA2, EPH…	1.9	8.1e-15
GO:0042060	wound healing	133	5.7	GNA13, NOG, GNA15, PDGFA, F13A1, EDN1, TLR4, TGFB1, TGFB2, VCL, NOV, DYSF, SERPINE2, GATA3, ILK, SERPINE1, FGFR1OP2, PIK3CA, PDGFC, PDGFD, LOX, TFPI2, EGFR, PIK3CG, RCOR1, ACTN1, CD40, MYH9, PLAUR, THBD, ANXA8L1, F3, LNPK, NFE2L2, TNFAIP3, WNT5A, DCBLD2, CAV1, WNT5B, ITGB3, ELK3, MYL9, TIMP1, PROCR, MACF1, RAC2, UBASH3B, AHNAK2, FN1, PLAT, MAFF, TGFBR1, TGFBR2, DOCK9, SMAD3, ITGA2, CELSR1, MCAM, …	1.9	8.3e-15
GO:0010604	positive regulation of macromolecule metabolic process	487	20.8	MEF2C, DLC1, MEF2A, FSTL3, RORA, MAP3K7, ACTG2, MC1R, CTGF, FOXF2, SERPINE1, ILK, PIK3CA, OGT, ADAM8, STAG1, PIK3CG, ROCK2, MED12, MECOM, MYH9, PLAUR, SPAG9, MELTF, F3, MST1R, TNFRSF6B, ZNF516, PPP2R3A, GNAI2, NFKBIA, HFE, HSPA1A, MYBL1, DYNAP, LPCAT1, PPP1R3G, ARNTL2, ASXL2, KLF12, TGFBR1, SPHK1, ASXL1, TGFBR2, PIBF1, ATM, GAS6, SHOX2, AREG, SMURF1, CREBRF, TAF1B, BACH1, ZNF292, TAF1A, LDLR, FOX…	1.4	1.7e-14
GO:0051345	positive regulation of hydrolase activity	196	8.4	DLC1, MEF2C, RAB3GAP2, RANGAP1, LPAR1, S1PR1, PICALM, CTGF, GIT2, ARHGEF40, RAPGEF4, AFDN, RAP1GDS1, SIPA1L3, CD40, TANK, FARP1, UHRF1, F3, TBC1D8B, RALGPS2, ARHGEF28, ASAP2, AKAP13, ASAP1, HSPA1A, MYO9B, ARFGEF2, MYO9A, ADAP1, CDC42EP2, CDC42EP1, AGRN, CDC42EP3, BMP2, SMAD3, S100A10, NCKAP1L, TRIO, EPHA2, IFI27, RGS4, RGS7, RGS9, FGF5, PPARG, EDNRA, SMAP1, NOD1, FGF1, DOCK10, DOCK11, ERRFI1, AGA…	1.7	1.4e-14
GO:0098602	single organism cell adhesion	173	7.4	MICB, IL6ST, IL18, FSTL3, PTPN22, LMO7, IL15, RORA, TGFB1, KIFC3, TGFB2, VCL, NOV, NRCAM, MAP3K7, SHB, CD44, SERPINE2, GATA3, ILK, PIK3CA, ADAM8, FNDC3A, NEGR1, EBI3, EGFR, PIK3CG, SATB1, ROCK1, ACTN4, EFNB2, RELB, HLA-A, ACTN1, LIG4, HLA-E, CERCAM, MYH9, PDCD1LG2, UNC13D, MELTF, CAMK4, TACSTD2, RGCC, PDE5A, HAS2, PRDM1, GBP1, WNT5A, CAV1, GCNT2, STK10, PEAK1, HFE, ITGB2, ITGB3, SOX9, ITGB1, MYL9…	1.8	1.6e-14
GO:0035295	tube development	139	5.9	MEF2C, DLC1, GNA13, NOG, PDGFA, PLXNA2, BTRC, EDN1, FSTL3, LUZP1, MTHFD1L, TGFB1, TGFB2, SERPINE2, CTGF, GATA3, WNK4, PLOD3, ILK, CCBE1, FOXF2, PDGFC, LOX, EGFR, RARG, EFNB2, NKX2-8, MED12, SIX2, SIX4, BASP1, STK4, HHEX, TNS3, MIB1, TACSTD2, SIX1, PRDM1, WNT5A, FGFR1, ITGB4, FAM212A, ITGB3, SOX9, LIF, NIPBL, PTK6, HEG1, NKX2-1, TRAF6, PLXND1, NKX2-5, KLF5, BMP4, BMP2, EPAS1, PODXL, ASXL1, TGFBR2,…	1.9	1.5e-14
GO:0001763	morphogenesis of a branching structure	66	2.8	GNA13, NOG, PDGFA, BTRC, EDN1, TBX20, GLI3, TGFB1, EDNRA, SPRY2, SPRY1, PAX8, SEMA3E, ILK, SEMA3C, YAP1, PAK1, SEMA3A, FGF1, SOCS3, LEF1, SIX2, SIX4, HMGA2, MMP14, STK4, SLIT2, HHEX, ADM, TACSTD2, CLIC4, SIX1, PRDM1, LRRK2, ACVR1, WNT5A, FGFR1, ADAMTS16, TNC, CSF1, PML, SOX9, FAT4, TGM2, NKX2-1, PLXND1, ETV5, ETV4, BMP4, BMP2, IL6, COL4A1, COL13A1, MET, TGFBR2, NTN4, CELSR1, SNAI2, EPHA2, SHOX2, …	2.7	9.9e-15
GO:0006915	apoptotic process	324	13.8	MEF2C, DLC1, FHIT, MEF2A, NOG, PNMA2, PTGS2, IL6ST, EDN1, AURKA, AURKB, LPAR1, AQP1, HMGN5, MAP3K7, SHB, USP53, BDNF, CD44, CTGF, SERPINE1, ILK, PIK3CA, CREB3L1, OGT, ADAM8, PIK3CG, RARG, ROCK1, PTPRH, PIM1, ESPL1, CD40, LIG4, MECOM, PLAUR, WDR92, F3, RGCC, PNMA1, TNFRSF6B, STK17B, NFKBIA, AKAP13, HSPA1A, STK17A, SEMA5A, NKX2-5, COL18A1, BMP4, BMP2, LGALS3, TP53BP2, LGALS1, TGFBR1, TGFBR2, SPHK1,…	1.5	3.2e-14
GO:0034097	response to cytokine	176	7.5	PTGS2, OSMR, IL6ST, IL18, EDN1, TNFSF15, IL17RE, ANKRD1, RORA, TNFSF12, IL17RD, IL17RA, IL31RA, ISG20, NLRC5, CD44, ISG15, ROBO1, GATA3, CCR10, ST3GAL6, RABGEF1, IL15RA, MX2, EBI3, PID1, GBP5, BST2, SOCS3, RELB, HLA-A, SOCS4, HLA-B, CD40, HLA-E, TANK, JUNB, ADAMTS7, F3, HAS2, MST1R, NFE2L2, TNFAIP3, GBP2, GBP1, TRAF1, WNT5A, TNFRSF6B, CAV1, IFITM1, MCL1, IFITM2, TNFRSF12A, IFITM3, OAS3, NFKBIA, I…	1.7	2.9e-14
GO:0043067	regulation of programmed cell death	273	11.7	DLC1, MEF2C, NOG, PNMA2, PTGS2, IL6ST, EDN1, AURKA, AURKB, LPAR1, AQP1, HMGN5, BDNF, CD44, CTGF, SERPINE1, ILK, PIK3CA, CREB3L1, ADAM8, PIK3CG, RARG, ROCK1, PIM1, CD40, LIG4, MECOM, PLAUR, NME4, F3, RGCC, PNMA1, TNFRSF6B, STK17B, NFKBIA, AKAP13, HSPA1A, STK17A, SEMA5A, DYNAP, NKX2-5, BMP4, COL18A1, BMP2, LGALS3, TP53BP2, LGALS1, TGFBR1, SPHK1, TRIO, ALMS1, SMAD3, NCKAP1L, ATM, GAS6, NOTCH2, NOTCH…	1.5	3.6e-14
GO:0040007	growth	197	8.4	MEF2C, SYT1, NOG, LTBP4, EDN1, AURKA, L1CAM, NOV, BDNF, S1PR1, SERPINE2, HTRA1, CTGF, SEMA7A, ILK, PIK3CA, HTRA3, RARG, MED12, DCAF1, MELTF, STC1, DCBLD2, KIAA1109, PPP2R3A, ESM1, RIMS2, SEMA5A, MACF1, CDA, AGRN, NKX2-5, BMP4, GPD2, PLAG1, BMP2, TGFBR1, SPHK1, TGFBR2, SMAD3, ALMS1, NKX6-1, PTPN12, PTPN11, NOTCH2, NOTCH1, SEMA6B, SMURF1, AREG, KLF2, NRP2, TRPV2, TBX20, PPARG, GJA1, GLI3, LATS2, WD…	1.7	3.7e-14
GO:0043087	regulation of GTPase activity	157	6.7	DLC1, RAB3GAP2, PDGFA, EIF5, IQGAP3, RGL3, RANGAP1, IQGAP1, AGAP6, S1PR1, TBC1D12, TIAM2, TIAM1, STARD8, RABGEF1, GIT2, ARHGEF40, AFDN, RAPGEF4, EGFR, IRS2, STMN3, RAP1GDS1, SIPA1L3, ACTN2, CD40, IRS1, TBC1D22A, FARP1, PLCE1, RASGRF1, OPHN1, LRRK2, TBC1D8B, WNT5A, SNX9, FGFR1, CAV2, RALGPS2, ARHGEF28, ASAP2, AKAP13, ASAP1, MYO9B, ARFGEF2, ITGB1, MYO9A, ADAP1, RASAL2, PTK2, CDC42EP2, DOCK2, CDC42E…	1.8	3.7e-14
GO:0032101	regulation of response to external stimulus	162	6.9	MICB, PTGS2, ZC3HAV1, OSMR, PDGFA, IL6ST, PLXNA2, IL18, EDN1, TLR2, PTPN22, TLR4, IL15, LPAR1, RORA, IL17RA, TGFB1, KANK2, NOV, CFP, S1PR1, SERPINE2, TIAM1, HTRA1, ROBO1, GATA3, SEMA7A, SERPINE1, CFH, RABGEF1, PDGFD, ADAM8, EGFR, PIK3CG, GBP5, SOCS3, EFNB2, HLA-A, PLAUR, VEGFC, THBD, SERPINF1, F3, NFE2L2, PRDM1, TNFAIP3, WNT5A, FGFR1, CAV1, PLXNC1, ADORA2B, SEMA5A, DOCK2, RAC2, UBASH3B, TRAF6, PL…	1.8	4e-14
GO:0030030	cell projection organization	255	10.9	MEF2C, SYT1, NOG, S100A6, MEF2A, L1CAM, AURKA, LPAR1, BDNF, PICALM, S1PR1, SEMA7A, ILK, RAB23, CEP290, PTPRK, PLD1, ROCK1, KIF5B, PTPRG, EFNB2, NKX2-8, MYH9, CEP152, FARP1, CEP162, SERPINF1, TACSTD2, MCIDAS, NPTN, EXT1, PMP22, C11ORF63, WDR60, ASAP1, CEP164, RIMS2, EPHB2, SEMA5A, CDC42EP2, CDC42EP1, RAC2, MACF1, NKX2-1, OBSL1, AGRN, LAMB1, CDC42EP3, IL1RAPL1, KLF5, KLF7, LGALS1, TGFBR1, ALMS1, PI…	1.6	5.5e-14
GO:0009790	embryo development	200	8.5	DLC1, MEF2C, NOG, EDN1, LUZP1, PLOD3, FOXF2, CEP290, COL12A1, RARG, PLD6, RRP7A, MYH3, MED12, LIG4, MYH9, VEGFC, TANC2, LNPK, PRDM1, EXT1, PPP2R3A, FAM212A, EPHB2, LIF, LAMB3, LAMB1, NKX2-5, BMP4, BMP2, TGFBR1, TGFBR2, SMAD3, CELSR1, EPHA2, ATM, SHOX2, NOTCH1, LAMA5, ETS2, KLF2, ENG, KLF4, NRP2, FOXA2, MYO7A, TBX20, GJA1, ZEB1, GLI3, LATS2, FLT3LG, EDNRA, HLX, CHST11, SEMA3C, SEMA3A, TOP2A, CYR61…	1.7	5.5e-14
GO:0051241	negative regulation of multicellular organismal process	210	9	MEF2C, NOG, PTGS2, EDN1, FSTL3, PTPN22, LPAR1, NOV, SHB, SERPINE2, MC1R, ISG15, WNK4, SEMA7A, SERPINE1, CRY1, PIK3CG, RARG, ROCK1, PTPRG, ROCK2, HMG20A, PDCD1LG2, PLAUR, ADAMTS7, SERPINF1, TACSTD2, RGCC, STC1, PMP22, UBA7, HFE, ASAP1, NFKBIA, EPHB2, SEMA5A, PROCR, UBASH3B, NKX2-1, DHX58, BMP4, PLAT, BMP2, IL1RL1, TGFBR1, LGALS1, TGFBR2, UBE2L6, SMAD3, NCKAP1L, ALMS1, PIBF1, ECM1, NKX6-1, GAS6, EP…	1.6	6.1e-14
GO:0051056	regulation of small GTPase mediated signal transduction	86	3.7	RHOJ, DLC1, ARHGAP18, LPAR1, ARHGAP12, TGFB2, SPRY2, ARHGAP22, SPRY1, ARHGAP20, ARHGAP5, TIAM2, ROBO1, TIAM1, STARD8, RABGEF1, ARHGEF40, OGT, NRG1, RHOF, RHOG, ALS2CL, ARHGAP9, KIF14, ARHGEF3, ARHGEF2, ARHGEF1, STMN3, ARHGEF18, FBP1, SIPA1L3, ARHGAP29, ARHGAP24, ARHGAP23, ECT2, FARP1, SLIT2, ARHGAP26, ARHGEF10, ARHGAP30, ARHGAP31, PLCE1, RASGRF1, OPHN1, GPR17, SRGAP1, RALGPS2, ARHGEF28, CSF1, RAL…	2.3	5e-14
GO:0009893	positive regulation of metabolic process	510	21.8	MEF2C, DLC1, MEF2A, PTGS2, FSTL3, RORA, MAP3K7, ACTG2, MC1R, CTGF, FOXF2, SERPINE1, ILK, PIK3CA, OGT, ADAM8, STAG1, PIK3CG, ROCK2, MED12, MECOM, MYH9, PLAUR, SPAG9, MELTF, F3, MST1R, TNFRSF6B, ZNF516, PPP2R3A, GNAI2, NFKBIA, HFE, HSPA1A, MYBL1, DYNAP, LPCAT1, PPP1R3G, ARNTL2, ASXL2, KLF12, TGFBR1, SPHK1, ASXL1, TGFBR2, PIBF1, ATM, GAS6, SHOX2, AREG, SMURF1, CREBRF, TAF1B, BACH1, ZNF292, TAF1A, LD…	1.3	1.3e-13
GO:0042981	regulation of apoptotic process	269	11.5	DLC1, MEF2C, NOG, PNMA2, PTGS2, IL6ST, EDN1, AURKA, AURKB, LPAR1, AQP1, HMGN5, BDNF, CD44, CTGF, SERPINE1, ILK, PIK3CA, CREB3L1, ADAM8, PIK3CG, RARG, ROCK1, PIM1, CD40, LIG4, PLAUR, NME4, F3, RGCC, PNMA1, TNFRSF6B, STK17B, NFKBIA, AKAP13, HSPA1A, STK17A, SEMA5A, DYNAP, NKX2-5, BMP4, COL18A1, BMP2, LGALS3, TP53BP2, LGALS1, TGFBR1, SPHK1, TRIO, ALMS1, SMAD3, NCKAP1L, ATM, GAS6, NOTCH2, NOTCH1, IFI2…	1.5	1.2e-13
GO:0043547	positive regulation of GTPase activity	146	6.2	DLC1, RAB3GAP2, PDGFA, EIF5, RGL3, RANGAP1, IQGAP1, AGAP6, S1PR1, TBC1D12, TIAM2, TIAM1, STARD8, RABGEF1, GIT2, ARHGEF40, AFDN, RAPGEF4, EGFR, IRS2, RAP1GDS1, SIPA1L3, ACTN2, CD40, IRS1, TBC1D22A, FARP1, PLCE1, RASGRF1, OPHN1, LRRK2, TBC1D8B, WNT5A, SNX9, FGFR1, CAV2, RALGPS2, ARHGEF28, ASAP2, AKAP13, ASAP1, MYO9B, ARFGEF2, MYO9A, ITGB1, ADAP1, RASAL2, PTK2, CDC42EP2, DOCK2, CDC42EP1, AGRN, FGD6,…	1.8	1e-13
GO:0010941	regulation of cell death	284	12.1	DLC1, MEF2C, NOG, PNMA2, PTGS2, IL6ST, EDN1, AURKA, AURKB, LPAR1, AQP1, HMGN5, NOV, BDNF, PICALM, CD44, CTGF, SERPINE1, ILK, PIK3CA, CREB3L1, ADAM8, PIK3CG, RARG, ROCK1, PIM1, CD40, LIG4, MECOM, PLAUR, NME4, NPC1, SERPINF1, F3, RGCC, PNMA1, TNFRSF6B, STK17B, NFKBIA, AKAP13, HSPA1A, STK17A, SEMA5A, DYNAP, NKX2-5, COL18A1, BMP4, BMP2, LGALS3, TP53BP2, LGALS1, TGFBR1, SPHK1, TRIO, ALMS1, SMAD3, NCKA…	1.5	2.8e-13
GO:0033993	response to lipid	182	7.8	MEF2C, MICB, PTGS2, IL18, EDN1, TLR2, PTPN22, TLR4, ANKRD1, IL15, RORA, LPAR1, AQP1, TGFB1, KANK2, TGFB2, SETX, ATP2B1, DAB2, BRINP2, CTGF, CDKN2D, SERPINE1, PDE4B, OGT, LOX, CRY1, AKIRIN2, EGFR, PID1, RBFOX2, RARG, ROCK2, MED12, PIM1, PDE4D, ARNTL, CD40, JUNB, DDIT4, NPC1, THBD, SERPINF1, CATSPER1, STC1, TGFB1I1, PRDM1, TNFAIP3, WNT5A, TNFRSF6B, PAM, CAV1, WNT5B, GNAI1, PAQR7, NFKBIA, TIMP4, PAQ…	1.7	3.4e-13
GO:0008284	positive regulation of cell proliferation	180	7.7	MEF2C, S100A6, NOG, PRC1, PTGS2, OSMR, IL6ST, PDGFA, MMP9, IL18, EDN1, IQGAP3, PTPN22, TTK, TLR4, IL15, TNFSF12, HMGN5, AQP1, TGFB1, IL11, IL31RA, TGFB2, S1PR3, S1PR1, GAB2, TIAM1, HTRA1, CTGF, ILK, PDGFC, PDGFD, EBI3, ASPM, AKIRIN2, EGFR, PID1, IRS2, RARG, BST1, EFNB2, HLA-A, SIX2, LIG4, CD40, HLA-E, IRS1, PDCD1LG2, PTHLH, VEGFC, TNS3, F3, KIAA1524, SIX1, LAMC2, HAS2, MST1R, TNFAIP3, WNT5A, FGFR…	1.7	4e-13
GO:0032970	regulation of actin filament-based process	91	3.9	MEF2C, DLC1, LIMA1, PDGFA, EDN1, ARHGAP18, FER, LPAR1, SDC4, TGFB1, TGFB2, ACTR2, FRMD6, S1PR1, ANK2, GSN, CTGF, PDE4B, SEMA3E, ILK, TMSB15B, PAK1, ICAM1, CCDC88A, BST2, ROCK1, PTGER4, ROCK2, PDE4D, ACTN2, TMSB10, PRKCE, MYH9, SIGLEC15, MYADM, FLNA, VASP, SLIT2, ARHGEF10, PPM1F, FMN1, PLEKHH2, TACSTD2, CFL2, RGCC, FCHSD2, FHOD3, STC1, TMSB4X, FCHSD1, CSF3, PAM, CAV1, ABI2, AKAP13, CCL26, CCL24, S…	2.2	3.7e-13
GO:0051493	regulation of cytoskeleton organization	107	4.6	MEF2C, DLC1, XPO1, PDGFA, EDN1, AURKA, LPAR1, TGFB1, TGFB2, S1PR1, CTGF, ILK, CEP85, STMN3, BST2, ROCK1, ROCK2, ACTN2, TMSB10, DCTN1, TACSTD2, RGCC, FCHSD2, CLIP1, PDCD6IP, FCHSD1, PAM, AKAP13, SEMA5A, PTK2, CDC42EP2, CDC42EP1, CDC42EP3, ARHGDIB, TGFBR1, NCKAP1L, S100A10, SMAD3, ALMS1, CELSR1, SHANK1, NCKAP1, PLK4, CORO1A, EPS8, TMOD3, SPTBN1, ABL2, LIMA1, ARHGAP18, FER, SDC4, ACTR2, GSN, SEMA3E,…	2	4.1e-13
GO:0002520	immune system development	175	7.5	MEF2C, MMP9, IL18, FAM20C, FST, FSTL3, PTPN22, TLR4, IL15, RORA, TGFB1, IL11, IL31RA, TGFB2, SHB, PICALM, ISG15, GAB2, GATA3, IL15RA, PTBP3, OGT, ADAM8, RBFOX2, SATB1, RARG, TTC7A, LIG1, RELB, SIPA1L3, ACTN1, HLA-B, SIX4, LIG4, CD40, MECOM, DCAF1, MYH9, STK4, JUNB, DCLRE1C, HHEX, CAMK4, SIX1, NFE2L2, PRDM1, TNFAIP3, WNT5A, NFKBIA, ANLN, PRRC2C, ITGB1, LIF, IRAK3, DOCK2, MEIS2, UBASH3B, DYRK3, TRA…	1.7	5.2e-13
GO:0030182	neuron differentiation	238	10.2	MEF2C, SYT1, NOG, S100A6, MEF2A, L1CAM, AURKA, RORA, LPAR1, BDNF, PICALM, BRINP2, S1PR1, SEMA7A, ILK, CEP290, PTPRK, KIF5B, PTPRG, EFNB2, NKX2-8, HMG20A, FARP1, SPAG9, SERPINF1, NPTN, PRDM1, EXT1, PMP22, PPP2R3A, ASAP1, RIMS2, EPHB2, SEMA5A, LIF, MACF1, NKX2-1, OBSL1, AGRN, LAMB1, IL1RAPL1, NKX2-5, BMP4, KLF7, BMP2, TGFBR1, LGALS1, ALMS1, ZNF521, NKX6-1, EPHA2, PTPN11, LAMA2, SHOX2, EPHA4, NOTCH1…	1.5	1.3e-12
GO:0048589	developmental growth	134	5.7	MEF2C, SYT1, NOG, PLXNA2, CRABP2, EDN1, L1CAM, AURKA, TGFB1, IQGAP1, TGFB2, VCL, NOV, NRCAM, BDNF, S1PR1, TIAM1, GATA3, SEMA7A, ILK, PIK3CA, ASPM, RARG, MED12, PDE4D, SIX4, BASP1, STK4, HHEX, TNS2, SIX1, STC1, SLITRK6, WNT5A, FGFR1, PLXNC1, PPP2R3A, TNFRSF12A, RIMS2, SOX9, ITGB1, SEMA5A, PTK2, NIPBL, MACF1, HEG1, AGRN, PLXND1, NKX2-5, FN1, BMP4, GPD2, PLAG1, CPNE5, TGFBR1, TGFBR2, SMAD3, ALMS1, B…	1.8	1.3e-12
GO:0051960	regulation of nervous system development	165	7	MEF2C, SYT1, NOG, IL6ST, PLXNA2, CRABP2, TLR2, L1CAM, ANKRD1, LPAR1, ITPKA, TGFB1, IQGAP1, SETX, NRCAM, BDNF, BRINP2, SERPINE2, TIAM1, ROBO1, GATA3, SEMA7A, ILK, IL15RA, AFDN, NEGR1, ASPM, RARG, PTPRG, ENC1, HMG20A, SIX4, LIG4, ARNTL, MAP4K4, VEGFC, SPAG9, MIB1, SERPINF1, HOXD3, SIX1, NPTN, CLIP1, NFE2L2, SLITRK6, LRRK2, PMP22, SLITRK5, WNT5A, FGFR1, PLXNC1, TNFRSF12A, ASAP1, ULK4, RIMS2, TIMP2, …	1.7	1.4e-12
GO:0032956	regulation of actin cytoskeleton organization	82	3.5	MEF2C, DLC1, LIMA1, PDGFA, EDN1, ARHGAP18, FER, LPAR1, SDC4, TGFB1, TGFB2, ACTR2, S1PR1, GSN, CTGF, SEMA3E, ILK, TMSB15B, PAK1, ICAM1, CCDC88A, BST2, ROCK1, PTGER4, ROCK2, ACTN2, TMSB10, PRKCE, SIGLEC15, MYADM, VASP, SLIT2, ARHGEF10, FMN1, PPM1F, PLEKHH2, TACSTD2, CFL2, RGCC, FCHSD2, FHOD3, TMSB4X, FCHSD1, CSF3, PAM, ABI2, AKAP13, CCL26, CCL24, SEMA5A, CDC42EP2, EZR, CDC42EP1, WIPF1, CDC42EP3, RA…	2.2	1.2e-12
GO:0048534	hematopoietic or lymphoid organ development	166	7.1	MEF2C, MMP9, IL18, FAM20C, FST, FSTL3, PTPN22, TLR4, IL15, RORA, TGFB1, IL11, IL31RA, TGFB2, SHB, PICALM, ISG15, GAB2, GATA3, IL15RA, PTBP3, OGT, ADAM8, RBFOX2, SATB1, RARG, TTC7A, RELB, ACTN1, SIPA1L3, HLA-B, SIX4, LIG4, MECOM, DCAF1, MYH9, STK4, JUNB, DCLRE1C, HHEX, CAMK4, SIX1, NFE2L2, PRDM1, WNT5A, NFKBIA, ANLN, PRRC2C, ITGB1, LIF, DOCK2, MEIS2, UBASH3B, DYRK3, TRAF6, RUNX1, RUNX2, NKX2-5, BM…	1.7	2e-12
GO:0070848	response to growth factor	142	6.1	MEF2C, NOG, LTBP1, LTBP2, LTBP4, FAM20C, EDN1, ZNF451, FSTL3, FSTL1, ANKRD1, TGFB1, IQGAP1, TGFB2, SETX, MAP3K7, DAB2, CD44, HTRA1, CTGF, GATA3, ILK, CCBE1, SPRED2, PDGFD, HTRA3, SPRED1, EGFR, RBFOX2, PTPRK, DDIT4, ADAMTS7, VEGFC, HHEX, NPTN, ANOS1, HAS2, TGFB1I1, WNT5A, FGFR1, CAV2, CAV1, GCNT2, HFE, HSPA1A, ITGB3, SOX9, ITGB1, PTK2, PEG10, MEIS2, NKX2-1, SKIL, RUNX2, NKX2-5, BMP4, BMP2, CSTF2, …	1.8	2.1e-12
GO:0071345	cellular response to cytokine stimulus	154	6.6	IL6ST, OSMR, IL18, EDN1, TNFSF15, IL17RE, ANKRD1, TNFSF12, RORA, IL17RD, IL17RA, IL31RA, ISG20, NLRC5, CD44, ISG15, ROBO1, GATA3, CCR10, ST3GAL6, RABGEF1, IL15RA, MX2, EBI3, PID1, GBP5, BST2, SOCS3, HLA-A, SOCS4, HLA-B, CD40, HLA-E, TANK, ADAMTS7, F3, HAS2, MST1R, NFE2L2, TNFAIP3, GBP2, GBP1, TRAF1, WNT5A, TNFRSF6B, CAV1, IFITM1, IFITM2, TNFRSF12A, IFITM3, OAS3, NFKBIA, IFI30, OAS1, HSPA1A, OAS2,…	1.7	2.2e-12
GO:0034330	cell junction organization	73	3.1	PVR, DLC1, TLN1, TLN2, FERMT2, GJA1, RASSF8, SDC4, IQGAP1, TGFB1, VCL, TGFB2, KIFC3, ANK2, SLK, ILK, CNTNAP1, AFDN, PRKCA, PTPRK, ACTN4, ROCK1, ROCK2, PKN2, ACTN1, FBLIM1, ACTN2, NECTIN3, MMP14, FLNC, ECT2, MYADM, VASP, FLNA, FMN1, PPM1F, TNS1, XIRP2, LAMC2, DST, CAV1, PARD3, LIMS2, ITGB4, ITGB3, CDH4, COL17A1, LAMB3, PTK2, MACF1, HEG1, UGT8, THBS1, APC, FN1, PLEC, ACTB, RAB8B, TGFBR1, ITGA2, SMA…	2.3	1.5e-12
GO:0051962	positive regulation of nervous system development	110	4.7	MEF2C, SYT1, IL6ST, CRABP2, TLR2, L1CAM, ANKRD1, LPAR1, ITPKA, IQGAP1, SETX, NRCAM, BDNF, BRINP2, SERPINE2, TIAM1, ROBO1, SEMA7A, ILK, NEGR1, ASPM, ENC1, LIG4, VEGFC, SPAG9, SERPINF1, HOXD3, NPTN, CLIP1, NFE2L2, SLITRK6, SLITRK5, WNT5A, FGFR1, TNFRSF12A, RIMS2, TIMP2, ZMYND8, EPHB2, LIF, SEMA5A, MACF1, PTK6, OBSL1, AGRN, SKIL, IL1RAPL1, NKX2-5, TMEM30A, FN1, BMP4, PLAG1, BMP2, CPNE5, ITGA3, SHANK…	1.9	2.1e-12
GO:0031175	neuron projection development	172	7.3	GPRIN1, MEF2C, SYT1, S100A6, NOG, MEF2A, PLXNA2, CRABP2, L1CAM, AURKA, ANKRD1, LPAR1, ITPKA, IQGAP1, TGFB2, SETX, VCL, NRCAM, BDNF, PICALM, ROBO1, TIAM1, GATA3, SEMA7A, ILK, IL15RA, NEGR1, EGFR, RBFOX2, PTPRK, STMN3, KIF5B, PTPRG, EFNB2, NKX2-8, ENC1, FARP1, MAP4K4, SERPINF1, RASGRF1, NPTN, CLIP1, ANOS1, OPHN1, NFE2L2, SLITRK6, EXT1, LRRK2, PMP22, SLITRK5, WNT5A, FGFR1, PLXNC1, TNFRSF12A, ASAP1, …	1.7	2.6e-12
GO:0030097	hemopoiesis	159	6.8	MEF2C, MMP9, IL18, FAM20C, FST, FSTL3, PTPN22, TLR4, IL15, RORA, TGFB1, IL11, IL31RA, TGFB2, SHB, PICALM, ISG15, GAB2, GATA3, IL15RA, PTBP3, OGT, ADAM8, RBFOX2, SATB1, RARG, TTC7A, RELB, ACTN1, SIPA1L3, HLA-B, LIG4, MECOM, MYH9, DCAF1, STK4, JUNB, DCLRE1C, HHEX, CAMK4, PRDM1, NFE2L2, WNT5A, NFKBIA, ANLN, PRRC2C, ITGB1, LIF, DOCK2, MEIS2, UBASH3B, DYRK3, TRAF6, RUNX1, RUNX2, NKX2-5, BMP4, KLF6, EP…	1.7	3e-12
GO:0061138	morphogenesis of a branching epithelium	58	2.5	GNA13, NOG, PDGFA, BTRC, EDN1, TBX20, GLI3, TGFB1, EDNRA, SPRY2, SPRY1, PAX8, SEMA3E, ILK, SEMA3C, YAP1, PAK1, SEMA3A, FGF1, SOCS3, LEF1, SIX4, MMP14, HMGA2, STK4, SLIT2, HHEX, ADM, TACSTD2, CLIC4, SIX1, ACVR1, WNT5A, FGFR1, ADAMTS16, TNC, CSF1, PML, SOX9, FAT4, TGM2, NKX2-1, PLXND1, ETV4, BMP4, BMP2, IL6, COL4A1, MET, TGFBR2, NTN4, CELSR1, EPHA2, NOTCH1, LAMA5, AREG, RBM15, ENG	2.6	1.9e-12
GO:0050767	regulation of neurogenesis	149	6.4	MEF2C, SYT1, NOG, IL6ST, PLXNA2, CRABP2, TLR2, L1CAM, ANKRD1, LPAR1, ITPKA, TGFB1, IQGAP1, SETX, NRCAM, BDNF, BRINP2, SERPINE2, TIAM1, ROBO1, GATA3, SEMA7A, ILK, IL15RA, AFDN, NEGR1, ASPM, PTPRG, ENC1, HMG20A, LIG4, ARNTL, MAP4K4, VEGFC, SPAG9, MIB1, SERPINF1, HOXD3, SIX1, NPTN, CLIP1, NFE2L2, LRRK2, PMP22, WNT5A, FGFR1, PLXNC1, TNFRSF12A, ASAP1, ULK4, RIMS2, TIMP2, SOX9, ZMYND8, EPHB2, SEMA5A, L…	1.7	4.4e-12
GO:0009887	organ morphogenesis	199	8.5	DLC1, MEF2C, NOG, FAM20C, EDN1, AQP1, ACTG2, S1PR1, HTRA1, CTGF, WNK4, PLOD3, ILK, FOXF2, RAB23, CEP290, AFDN, RARG, EFNB2, MED12, VEGFC, TACSTD2, STC1, HAS2, PRDM1, PPP2R3A, TDRD7, SERPINH1, EPHB2, LIF, NKX2-1, LAMB1, NKX2-5, BMP4, COL18A1, PLAG1, BMP2, TGFBR1, ASXL1, TGFBR2, SMAD3, ALMS1, CELSR1, EPHA2, NKX6-1, SHOX2, NOTCH2, CYP7B1, NOTCH1, LAMA5, FJX1, SMURF2, SMURF1, AREG, ENG, NRP2, PPARA, …	1.6	5.1e-12
GO:0071495	cellular response to endogenous stimulus	229	9.8	MEF2C, NOG, LTBP1, ADCY7, PTGS2, LTBP2, LTBP4, EDN1, FSTL3, PTPN22, RANGAP1, FSTL1, RORA, AQP1, ATP2B1, MAP3K7, CD44, HTRA1, CTGF, PLOD3, ILK, PIK3CA, OGT, HTRA3, CRY1, PIK3CG, PTPRK, RARG, MED12, UBR2, ADAMTS7, NPC1, SERPINF1, NPTN, STC1, HAS2, TGFB1I1, GCNT2, HFE, HSPA1A, NKX2-1, NKX2-5, BMP4, KLF5, BMP2, TGFBR1, KLF10, TGFBR2, SMAD3, PTPN12, NKX6-1, PTPN11, CYP7B1, NOTCH1, SMURF2, SMURF1, KLF2…	1.5	5.5e-12
GO:0016337	single organismal cell-cell adhesion	156	6.7	MICB, IL6ST, IL18, FSTL3, PTPN22, LMO7, IL15, RORA, TGFB1, TGFB2, VCL, KIFC3, NOV, NRCAM, MAP3K7, SHB, CD44, SERPINE2, GATA3, ILK, PIK3CA, ADAM8, FNDC3A, NEGR1, EBI3, EGFR, PIK3CG, SATB1, ROCK1, EFNB2, RELB, HLA-A, ACTN1, LIG4, HLA-E, CERCAM, MYH9, PDCD1LG2, CAMK4, RGCC, PDE5A, HAS2, PRDM1, WNT5A, CAV1, GCNT2, STK10, HFE, ITGB2, ITGB3, SOX9, ITGB1, MYL9, PTK2, DOCK2, RAC2, UBASH3B, ITGAV, TRAF6, …	1.7	4.8e-12
GO:0031325	positive regulation of cellular metabolic process	470	20.1	MEF2C, DLC1, MEF2A, PTGS2, FSTL3, RORA, MAP3K7, MC1R, CTGF, FOXF2, SERPINE1, ILK, PIK3CA, OGT, ADAM8, STAG1, PIK3CG, ROCK2, MED12, MECOM, MYH9, PLAUR, SPAG9, MELTF, F3, MST1R, TNFRSF6B, ZNF516, GNAI2, NFKBIA, HFE, HSPA1A, MYBL1, DYNAP, PPP1R3G, ARNTL2, ASXL2, KLF12, TGFBR1, SPHK1, ASXL1, TGFBR2, PIBF1, ATM, GAS6, SHOX2, AREG, SMURF1, BACH1, ZNF292, LDLR, FOXA2, ELF4, KISS1, NOD1, MASTL, FGF1, SER…	1.3	8.4e-12
GO:0002521	leukocyte differentiation	113	4.8	MEF2C, MMP9, IL18, FAM20C, FSTL3, PTPN22, TLR4, IL15, RORA, TGFB1, IL11, IL31RA, SHB, GAB2, GATA3, IL15RA, OGT, ADAM8, SATB1, RELB, HLA-B, LIG4, MYH9, DCAF1, JUNB, DCLRE1C, HHEX, CAMK4, PRDM1, ITGB1, LIF, DOCK2, UBASH3B, TRAF6, RUNX1, RUNX2, BMP4, KLF6, LGALS3, KLF10, LGALS1, TGFBR2, NCKAP1L, GAS6, EPHA2, ATM, ATP7A, NOTCH2, PLCG2, HDAC9, LRRC8A, LEPR, PPARG, ZEB1, GLI3, FLT3LG, CLCF1, IL4R, HLX,…	1.9	6.8e-12
GO:0007015	actin filament organization	88	3.8	DLC1, LIMA1, PDLIM3, ARHGAP18, FER, PAWR, LPAR1, SDC4, ACTR2, S1PR1, GSN, CTGF, TMSB15B, PAK1, CAP1, ZYX, RHOF, PLS3, ICAM1, ARHGEF2, ACTN4, ROCK1, PTGER4, ROCK2, MICAL2, ACTN1, ACTN2, TMSB10, PRKCE, MYADM, VASP, SLIT2, FLNA, ARHGEF10, PPM1F, FMN1, PLEKHH2, TACSTD2, CFL2, RGCC, FCHSD2, FHOD3, TMSB4X, FCHSD1, CSF3, SHROOM4, FRYL, DIAPH2, ABI2, TPM2, ITGB1, TPM4, CCL26, CCL24, SEMA5A, CDC42EP2, EZR…	2.1	6.7e-12
GO:0035239	tube morphogenesis	90	3.8	GNA13, MEF2C, DLC1, NOG, BTRC, EDN1, TBX20, GJA1, LUZP1, ZEB1, SDC4, GLI3, TGFB1, MTHFD1L, TGFB2, EDNRA, SPRY2, SPRY1, OSR1, GATA3, WNK4, HLX, PAX8, SEMA3E, ILK, YAP1, PAK1, FGF1, IPMK, EGFR, RARG, MICAL2, EFNB2, MED12, LEF1, SIX2, SIX4, HMGA2, MMP14, STK4, VASP, SLIT2, FMN1, MIB1, HHEX, ACVR2B, ADM, CLIC4, TACSTD2, SIX1, SEMA4C, ACVR1, WNT5A, SDCCAG8, ADAMTS16, TNC, CSF1, PML, SOX9, STARD13, NIP…	2.1	9.7e-12
GO:0050769	positive regulation of neurogenesis	97	4.1	MEF2C, SYT1, IL6ST, CRABP2, TLR2, L1CAM, LPAR1, ANKRD1, ITPKA, IQGAP1, SETX, NRCAM, BDNF, BRINP2, SERPINE2, TIAM1, ROBO1, SEMA7A, ILK, NEGR1, ASPM, ENC1, LIG4, SPAG9, VEGFC, SERPINF1, HOXD3, NPTN, CLIP1, NFE2L2, WNT5A, FGFR1, TNFRSF12A, TIMP2, RIMS2, ZMYND8, EPHB2, SEMA5A, LIF, MACF1, PTK6, OBSL1, SKIL, NKX2-5, IL1RAPL1, TMEM30A, FN1, PLAG1, BMP4, BMP2, CPNE5, ITGA3, SHANK1, NKX6-1, FEZF1, SHOX2,…	2	1.1e-11
GO:0043542	endothelial cell migration	52	2.2	NRP2, PTGS2, EDN1, TNFSF12, AMOTL1, TGFB1, NOV, ROBO1, GATA3, CCBE1, PIK3CA, LOXL2, FGF1, S100A2, PRKCA, SP100, ROCK2, EFNB2, MYH9, SLIT2, VEGFC, SERPINF1, RGCC, STC1, NFE2L2, WNT5A, FGFR1, ITGB2, ITGB3, ITGB1, STARD13, SEMA5A, PTK2, PLEKHG5, PRSS3, THBS1, PLXND1, SCG2, BMP4, TGFBR1, MET, STAT1, ANXA3, EPHA2, NOTCH1, SRPX2, ID1, ETS1, MAPK14, SH3BGRL3, HDAC9, KLF4	2.7	7.4e-12
GO:0031344	regulation of cell projection organization	129	5.5	MEF2C, SYT1, PLXNA2, CRABP2, L1CAM, ANKRD1, LPAR1, ITPKA, IQGAP1, SETX, NRCAM, BDNF, TIAM1, ROBO1, GATA3, SEMA7A, ILK, IL15RA, NEGR1, PLD1, PTPRG, ENC1, TBC1D22A, MAP4K4, SERPINF1, TACSTD2, NPTN, CLIP1, NFE2L2, LRRK2, PMP22, WNT5A, FGFR1, CAV1, PLXNC1, TNFRSF12A, ASAP1, ULK4, RIMS2, ZMYND8, EPHB2, SEMA5A, PTK2, CDC42EP2, CDC42EP1, RAC2, MACF1, PTK6, OBSL1, SKIL, AGRN, PLXND1, IL1RAPL1, CDC42EP3, …	1.8	1.4e-11
GO:0006952	defense response	277	11.8	PVR, MEF2C, LYPD1, PTGS2, OSMR, IL6ST, EDN1, PTPN22, RORA, ISG20, NOV, MAP3K7, CFP, S1PR3, CD44, ISG15, HTRA1, SEMA7A, SERPINE1, CFH, RAB23, ADAM8, PIK3CG, GBP5, NCF2, OPTN, CD40, TANK, UNC13D, CAMK4, SERPINF1, KRT16, F3, MST1R, PRDM1, PNMA1, TNFRSF6B, GSDMD, OAS3, NFKBIA, IFI30, HFE, AFAP1L2, HSPA1A, OAS1, PXK, OAS2, LGALS3BP, VEZF1, DHX58, BMP2, PELI1, LGALS3, IL1RL1, CFB, SPHK1, SMAD3, SLAMF7,…	1.4	2.1e-11
GO:0071363	cellular response to growth factor stimulus	135	5.8	MEF2C, NOG, LTBP1, LTBP2, LTBP4, FAM20C, EDN1, ZNF451, FSTL3, FSTL1, ANKRD1, TGFB1, IQGAP1, TGFB2, SETX, MAP3K7, DAB2, CD44, HTRA1, CTGF, GATA3, ILK, CCBE1, SPRED2, PDGFD, HTRA3, SPRED1, EGFR, RBFOX2, PTPRK, DDIT4, ADAMTS7, VEGFC, HHEX, NPTN, ANOS1, HAS2, TGFB1I1, WNT5A, FGFR1, CAV2, CAV1, GCNT2, HFE, HSPA1A, ITGB3, SOX9, ITGB1, PTK2, PEG10, NKX2-1, SKIL, RUNX2, NKX2-5, BMP4, BMP2, CSTF2, TGFBR1,…	1.8	1.8e-11
GO:0051246	regulation of protein metabolic process	421	18	MEF2C, DLC1, FHIT, LTBP4, MAP3K7, ISG15, SERPINE2, CTGF, SERPINE1, ILK, PIK3CA, OGT, ADAM8, PIK3CG, ROCK1, ROCK2, CRTAP, HMG20A, MECOM, MYH9, PLAUR, SPAG9, MELTF, SERPINF1, F3, MST1R, WFDC2, WFDC3, TNFRSF6B, PPP2R3A, DBNDD2, GNAI2, NFKBIA, HFE, HSPA1A, SERPINH1, CTIF, DUSP18, DYNAP, RAC2, LPCAT1, HEXIM1, UBASH3B, TGFBR1, TGFBR2, SPHK1, PIBF1, ATM, GAS6, RGS4, PI3, SMURF1, CREBRF, LXN, NUAK1, LATS…	1.3	2.6e-11
GO:1901700	response to oxygen-containing compound	269	11.5	MEF2C, LYPD1, ADCY7, PTGS2, EDN1, PTPN22, RANGAP1, RORA, LPAR1, AQP1, ATP2B1, BRINP2, CTGF, SERPINE1, PIK3CA, OGT, CRY1, PIK3CG, PTPRK, RARG, KIF5B, ROCK2, PIM1, UBR2, CD40, SERPINF1, CATSPER1, STC1, PRDM1, TNFRSF6B, GNAI2, GNAI1, NFKBIA, SLC29A1, DYNAP, HNMT, AGRN, COL18A1, KLF5, PELI1, LGALS1, TGFBR1, KLF10, TGFBR2, ASXL1, NKX6-1, GAS6, PTPN11, NOTCH1, IFI27, CD55, EPS8, KCNJ8, ETS1, AREG, KLF2…	1.5	2.4e-11
GO:0009719	response to endogenous stimulus	281	12	MEF2C, LYPD1, NOG, LTBP1, ADCY7, PTGS2, LTBP2, LTBP4, EDN1, FSTL3, PTPN22, FSTL1, RANGAP1, RORA, AQP1, ATP2B1, MAP3K7, CD44, CTGF, HTRA1, PLOD3, ILK, PIK3CA, HTRA3, OGT, CRY1, PIK3CG, PTPRK, RARG, MED12, UBR2, ADAMTS7, NPC1, SERPINF1, CATSPER1, NPTN, STC1, HAS2, TGFB1I1, GCNT2, GNAI2, GNAI1, NFKBIA, HFE, HSPA1A, HNMT, NKX2-1, NKX2-5, KLF5, BMP4, BMP2, TGFBR1, KLF10, TGFBR2, SMAD3, KCNK1, PTPN12, …	1.4	2.8e-11
GO:0007507	heart development	118	5	MEF2C, DLC1, MEF2A, NOG, LTBP1, EDN1, PDLIM3, LUZP1, ANKRD1, TGFB1, TGFB2, S1PR1, ANK2, ROBO1, GATA3, ILK, LOX, EGFR, EFNB2, MED12, ACTN2, BASP1, STK4, HHEX, ADAMTS6, MIB1, PLCE1, SIX1, HAS2, PRDM1, WNT5A, DNAH11, PAM, FGFR1, AKAP13, BICC1, SOX9, ITGB1, PTK2, ECE1, NIPBL, HEXIM1, HEG1, OBSL1, PLXND1, NKX2-5, BMP4, SMG9, BMP2, TGFBR1, ASXL1, TGFBR2, SMAD3, ARMC4, TEAD2, ITGA3, SMYD2, ATM, PTPN11, …	1.8	2.1e-11
GO:0051174	regulation of phosphorus metabolic process	290	12.4	MEF2C, DLC1, NOG, ADCY7, IL6ST, FAM20C, EDN1, PTPN22, LPAR1, MAP3K7, SHB, CD44, MC1R, CTGF, SEMA7A, ILK, PIK3CA, PELI2, OGT, ADAM8, PIK3CG, ROCK1, ROCK2, PIM1, CD40, MECOM, FARP1, PLAUR, VEGFC, SPAG9, RGCC, NPTN, MST1R, TNFRSF6B, CDK5R2, DBNDD2, GCNT2, GNAI2, AKAP12, HFE, AKAP13, AFAP1L2, LIF, DUSP18, DYNAP, RAC2, UBASH3B, HEXIM1, CDA, BMP4, BMP2, NRBF2, TGFBR1, TGFBR2, SPHK1, NCKAP1L, SMAD3, PIB…	1.4	3.3e-11
GO:0061061	muscle structure development	131	5.6	MEF2C, MEF2A, NOG, MYH15, IL18, EDN1, ANKRD1, RORA, TGFB1, TGFB2, DMPK, NOV, BDNF, S1PR1, ANK2, ILK, MYH3, EFNB2, FOXN2, ACTN2, SIX4, BASP1, ARNTL, MYH9, SPAG9, TAGLN, SIX1, WNT5A, FGFR1, CAV2, CAV1, PPP2R3A, AKAP13, SOX9, ITGB1, NR2C2, LIF, OBSL1, HEG1, SKIL, NKX2-5, KLF5, BMP4, MAFF, BMP2, EPAS1, TGFBR1, LGALS1, TGFBR2, SMAD3, FOXP2, SHOX2, LAMA2, NOTCH1, SYNE1, PRICKLE1, LAMA5, HIVEP3, MYH11, …	1.8	2.6e-11
GO:0006954	inflammatory response	139	5.9	PTGS2, IL6ST, OSMR, IL18, TLR2, IL17RE, TLR4, IL15, RORA, TLR6, TGFB1, IL17RA, IL31RA, NOV, CFP, S1PR3, GATA3, SEMA7A, SERPINE1, CFH, RABGEF1, ADAM8, EGFR, PIK3CG, GBP5, SOCS3, RELB, CD40, UNC13D, SERPINF1, CAMK4, KRT16, F3, NFE2L2, TNFAIP3, PNMA1, WNT5A, TNFRSF6B, ADORA2B, GSDMD, HFE, ITGB2, AFAP1L2, PXK, SCN9A, NRROS, FN1, BMP2, CFB, IL1RL1, SPHK1, SMAD3, ITGA2, ECM1, EPHA2, GGT5, NOTCH1, CD55,…	1.7	2.7e-11
GO:0080134	regulation of response to stress	241	10.3	PVR, MEF2C, PTGS2, OSMR, IL6ST, EDN1, PTPN22, RORA, NOV, CFP, MAP3K7, CD44, SERPINE2, VPS13C, HTRA1, RAE1, CTGF, SEMA7A, SERPINE1, CFH, CREB3L1, ADAM8, CRY1, PIK3CG, GBP5, MECOM, TANK, PLAUR, SPAG9, SERPINF1, F3, NFKBIA, HSPA1A, UBASH3B, NUP50, DHX58, PLAT, BMP2, PELI1, IL1RL1, CFB, TGFBR2, SMAD3, SMYD2, ATM, PTPN11, EPHA4, CD55, ETS1, CD59, PLAU, KLF4, CREBRF, PPARA, FOXA2, LDLR, NUAK1, PPARG, G…	1.5	3.3e-11
GO:0001775	cell activation	183	7.8	MEF2C, GNA13, LYPD1, MICB, GNA15, PDGFA, IL6ST, IL18, EDN1, TLR2, PTPN22, TLR4, IL15, RORA, TLR6, IL17RA, TGFB1, IL11, IL31RA, VCL, MAP3K7, SHB, SERPINE2, GAB2, CTGF, GATA3, ILK, RABGEF1, IL15RA, PIK3CA, ADAM8, EBI3, EGFR, PIK3CG, SATB1, IRS2, BST2, BST1, EFNB2, RELB, HLA-A, ACTN1, LIG4, CD40, HLA-E, DCAF1, MYH9, AHR, PDCD1LG2, DCLRE1C, HHEX, THBD, UNC13D, CAMK4, RGCC, PDE5A, PRDM1, TNFAIP3, WNT5…	1.6	3.1e-11
GO:0071396	cellular response to lipid	117	5	MEF2C, IL18, EDN1, TLR2, PTPN22, TLR4, ANKRD1, IL15, LPAR1, RORA, AQP1, TGFB1, KANK2, SETX, ATP2B1, DAB2, BRINP2, PDE4B, SERPINE1, OGT, CRY1, PID1, EGFR, RBFOX2, RARG, ROCK2, PIM1, MED12, PDE4D, CD40, ARNTL, DDIT4, NPC1, SERPINF1, STC1, PRDM1, TGFB1I1, TNFAIP3, WNT5A, WNT5B, GNAI1, PAQR7, NFKBIA, PAQR8, ABCA1, SOX9, NR2C2, PAQR5, DYNAP, PTK6, TRAF6, BMP4, MUC1, TAF1, NR4A2, ITGA2, TEAD2, CYP7B1, …	1.8	3.5e-11
GO:0019220	regulation of phosphate metabolic process	289	12.3	MEF2C, DLC1, NOG, ADCY7, IL6ST, EDN1, PTPN22, LPAR1, MAP3K7, SHB, CD44, MC1R, CTGF, SEMA7A, ILK, PIK3CA, PELI2, OGT, ADAM8, PIK3CG, ROCK1, ROCK2, PIM1, CD40, MECOM, FARP1, PLAUR, VEGFC, SPAG9, RGCC, NPTN, MST1R, TNFRSF6B, CDK5R2, DBNDD2, GCNT2, GNAI2, AKAP12, HFE, AKAP13, AFAP1L2, LIF, DUSP18, DYNAP, RAC2, UBASH3B, HEXIM1, CDA, BMP4, BMP2, NRBF2, TGFBR1, TGFBR2, SPHK1, NCKAP1L, SMAD3, PIBF1, ATM,…	1.4	4.9e-11
GO:0007160	cell junction assembly	59	2.5	DLC1, FERMT2, SDC4, IQGAP1, VCL, CD96, CD44, SLK, CTGF, HPSE, TIAM1, SEMA3E, ILK, SERPINE1, ZYX, PTPRK, ROCK1, ROCK2, ACTN1, ACTN2, CDK6, MMP14, FMN1, PPM1F, VEGFC, HOXD3, SGCE, EPDR1, CSF1, ITGB4, ITGA10, ITGB2, ITGB3, CCL28, ITGB1, PTK2, COL17A1, MACF1, ITGB8, ITGAV, MSLN, ADAMTS12, THBS1, RASA1, FN1, COL13A1, ITGA1, ITGA2, SMAD3, S100A10, ITGA3, AJUBA, CORO1C, ITGA6, LAMA5, FBLN5, TRIP6, PHLDB…	2.4	2.5e-11
GO:0034329	cell-matrix adhesion	59	2.5	DLC1, TLN1, TLN2, FERMT2, GJA1, SDC4, IQGAP1, VCL, ANK2, SLK, ILK, CNTNAP1, PRKCA, PTPRK, ACTN4, ROCK1, ROCK2, PKN2, FBLIM1, ACTN1, ACTN2, FLNC, MMP14, ECT2, VASP, FLNA, FMN1, PPM1F, TNS1, LAMC2, DST, CAV1, PARD3, LIMS2, ITGB4, ITGB3, LAMB3, PTK2, COL17A1, MACF1, HEG1, UGT8, THBS1, FN1, PLEC, APC, ACTB, ITGA2, SMAD3, S100A10, SNAI2, GJB2, AJUBA, CORO1C, ITGA6, ITGA5, LAMA5, TRIP6, PHLDB2	2.4	2.5e-11
GO:0007044	cell-substrate junction assembly	36	1.5	DLC1, TLN1, FERMT2, ITGB4, ITGB3, SDC4, IQGAP1, PTK2, COL17A1, LAMB3, SLK, MACF1, THBS1, PLEC, FN1, PTPRK, ROCK1, ROCK2, S100A10, SMAD3, ACTN1, ITGA2, ACTN2, MMP14, PPM1F, CORO1C, FMN1, AJUBA, TNS1, ITGA6, LAMA5, ITGA5, LAMC2, TRIP6, DST, PHLDB2	3.3	1.6e-11
GO:0010769	regulation of cell morphogenesis involved in differentiation	87	3.7	NOG, FOXA2, PLXNA2, TRPV2, CRABP2, L1CAM, ITPKA, TGFB1, TGFB2, NRCAM, BDNF, DAB2, WDR36, ROBO1, TIAM1, SEMA7A, PAX8, SEMA3E, ILK, SEMA3C, SEMA3A, NRG1, GOLGA4, RAP2A, ARHGEF1, ACTN4, LEF1, MYADM, SLIT2, FLNA, UNC13D, CRKL, MELTF, SEMA4F, TACSTD2, RGCC, SEMA4C, SEMA4B, HAS2, TGFB1I1, LRRK2, GBP1, ACVR1, WNT5A, PLXNC1, GCNT2, TNFRSF12A, CDH4, TCF7L2, EPHB2, LIF, SEMA5A, PTK2, MACF1, BCL11A, NKX2-1,…	2	3.4e-11
GO:0031324	negative regulation of cellular metabolic process	395	16.9	MEF2C, FHIT, MEF2A, SERPINE2, ISG15, FOXF2, SERPINE1, ILK, DHX34, PTBP3, OGT, PIK3CG, PTPRK, ROCK1, ROCK2, RCOR1, CRTAP, HMG20A, DCAF1, MECOM, PLAUR, SERPINF1, WFDC2, WFDC3, DBNDD2, GNAI2, HFE, HSPA1A, SERPINH1, DUSP18, UBASH3B, HEXIM1, KLF12, KLF10, ASXL1, PIBF1, ATM, GAS6, SHOX2, RGS4, PI3, SMURF2, BACH1, CREBRF, ZNF488, FOXA2, LXN, RLIM, LATS2, SERPINA5, QKI, SERPINA1, MASTL, SIK1, BHLHE41, ER…	1.3	6.7e-11
GO:0090066	regulation of anatomical structure size	112	4.8	PTGS2, PLXNA2, CRABP2, EDN1, IQGAP3, L1CAM, AQP1, NRCAM, BDNF, PLOD3, SEMA7A, ILK, HTR1D, EGFR, RARG, RAP1GDS1, ACTN2, TMSB10, HTR7, FCHSD2, FCHSD1, LRRK2, WNT5A, CAV1, PLXNC1, ADORA2B, TNFRSF12A, SEMA5A, CDC42EP2, ECE1, CDC42EP1, MACF1, P2RY2, PLXND1, CDC42EP3, FN1, ITGA1, NCKAP1L, DOCK5, NKX6-1, NCKAP1, DOCK4, CORO1A, SEMA6B, EPS8, KCNJ8, TBXA2R, ADRA1B, TMOD3, SPTBN1, LIMA1, LRRC8A, HP1BP3, TR…	1.8	6.1e-11
GO:0060562	epithelial tube morphogenesis	81	3.5	GNA13, MEF2C, DLC1, NOG, BTRC, EDN1, TBX20, GJA1, LUZP1, SDC4, GLI3, TGFB1, MTHFD1L, TGFB2, EDNRA, SPRY2, SPRY1, OSR1, GATA3, WNK4, PAX8, SEMA3E, ILK, YAP1, PAK1, FGF1, IPMK, RARG, MICAL2, EFNB2, MED12, LEF1, SIX4, HMGA2, MMP14, STK4, VASP, SLIT2, FMN1, MIB1, HHEX, ADM, TACSTD2, CLIC4, SIX1, SEMA4C, ACVR1, WNT5A, ADAMTS16, TNC, CSF1, PML, SOX9, STARD13, FAT4, NKX2-1, TRAF6, PLXND1, NKX2-5, ETV4, …	2.1	5.2e-11
GO:0001932	regulation of protein phosphorylation	241	10.3	MEF2C, NOG, ADCY7, IL6ST, EDN1, PTPN22, LPAR1, MAP3K7, SHB, CD44, CTGF, SEMA7A, ILK, PIK3CA, PELI2, ADAM8, PIK3CG, ROCK2, PIM1, CD40, MECOM, PLAUR, VEGFC, SPAG9, RGCC, NPTN, MST1R, TNFRSF6B, CDK5R2, DBNDD2, GCNT2, GNAI2, HFE, AKAP13, AFAP1L2, LIF, DUSP18, DYNAP, RAC2, UBASH3B, HEXIM1, BMP4, BMP2, TGFBR1, SPHK1, TGFBR2, NCKAP1L, PIBF1, ATM, EPHA2, GAS6, PTPN11, EPHA4, RGS4, ENG, KLF4, CLSPN, SPINK…	1.5	1.1e-10
GO:0048754	branching morphogenesis of an epithelial tube	49	2.1	GNA13, NOG, BTRC, TBX20, EDN1, GLI3, TGFB1, EDNRA, SPRY2, SPRY1, PAX8, ILK, SEMA3E, PAK1, YAP1, FGF1, LEF1, SIX4, MMP14, HMGA2, STK4, SLIT2, HHEX, TACSTD2, CLIC4, SIX1, ACVR1, WNT5A, CSF1, TNC, ADAMTS16, PML, SOX9, FAT4, NKX2-1, PLXND1, ETV4, BMP4, BMP2, COL4A1, MET, TGFBR2, CELSR1, EPHA2, NOTCH1, LAMA5, AREG, RBM15, ENG	2.6	5e-11
GO:0042325	regulation of phosphorylation	255	10.9	MEF2C, NOG, ADCY7, IL6ST, EDN1, PTPN22, LPAR1, MAP3K7, SHB, CD44, CTGF, SEMA7A, ILK, PIK3CA, PELI2, OGT, ADAM8, PIK3CG, ROCK2, PIM1, CD40, MECOM, PLAUR, VEGFC, SPAG9, RGCC, NPTN, MST1R, TNFRSF6B, CDK5R2, DBNDD2, GCNT2, GNAI2, HFE, AKAP13, AFAP1L2, LIF, DUSP18, DYNAP, RAC2, UBASH3B, HEXIM1, BMP4, BMP2, NRBF2, TGFBR1, TGFBR2, SPHK1, NCKAP1L, PIBF1, ATM, EPHA2, GAS6, PTPN11, EPHA4, SRPX2, RGS4, AREG…	1.5	1.1e-10
GO:0010975	regulation of neuron projection development	99	4.2	MEF2C, SYT1, PLXNA2, CRABP2, L1CAM, ANKRD1, LPAR1, ITPKA, IQGAP1, SETX, NRCAM, BDNF, TIAM1, ROBO1, SEMA7A, GATA3, ILK, IL15RA, NEGR1, PTPRG, ENC1, MAP4K4, SERPINF1, NPTN, CLIP1, NFE2L2, PMP22, LRRK2, WNT5A, FGFR1, PLXNC1, TNFRSF12A, ASAP1, ULK4, RIMS2, ZMYND8, EPHB2, SEMA5A, PTK2, MACF1, PTK6, OBSL1, SKIL, PLXND1, IL1RAPL1, TMEM30A, FN1, CPNE5, LGALS1, ITGA3, SHANK1, NKX6-1, SHOX2, EPHA4, SEMA6B,…	1.9	1e-10
GO:0009967	positive regulation of signal transduction	259	11.1	S100A4, MEF2C, PTGS2, IL6ST, EDN1, PTPN22, LPAR1, NOV, MAP3K7, SHB, BDNF, CD44, MC1R, CTGF, SEMA7A, CCBE1, ILK, PELI2, ADAM8, PIK3CG, CD40, PLAUR, SPAG9, F3, NPTN, MST1R, TGFB1I1, TNFRSF6B, PPP2R3A, GCNT2, GNAI2, AKAP12, HFE, AKAP13, AFAP1L2, HSPA1A, ESM1, RIMS2, LIF, SEMA5A, MACF1, HEXIM1, DHX58, BMP4, ASXL2, BMP2, PELI1, TP53BP2, LGALS1, TGFBR1, SPHK1, ASXL1, SMAD3, PIBF1, ECM1, ATM, GAS6, PTPN…	1.4	2e-10
GO:0010628	positive regulation of gene expression	298	12.7	MEF2C, MEF2A, NOG, EDN1, FSTL3, PTPN22, RORA, HMGN5, ACTG2, PICALM, S1PR1, MC1R, CTGF, SERPINE1, FOXF2, CCBE1, ILK, CREB3L1, CEP290, OGT, ADAM8, STAG1, RARG, ROCK2, NKX2-8, MED12, CD40, MECOM, MYH9, UHRF1, MELTF, CAMK4, MCIDAS, RGCC, PRDM1, TGFB1I1, ZNF516, NFKBIA, HFE, HSPA1A, AFAP1L2, MYBL1, RIMS2, LIF, NKX2-1, AGRN, ARNTL2, NKX2-5, PLAG1, BMP4, KLF5, ASXL2, KLF6, KLF7, BMP2, KLF12, TGFBR1, MAM…	1.4	2.1e-10
GO:0010632	regulation of epithelial cell migration	53	2.3	NRP2, PTGS2, MMP9, EDN1, AMOTL1, TGFB1, TGFB2, GATA3, CCBE1, SEMA3A, FGF1, CEACAM1, PRKCA, SP100, ROCK2, PTPRG, PRKCE, SLIT2, PPM1F, VEGFC, SERPINF1, TACSTD2, RGCC, HAS2, MCC, STC1, NFE2L2, WNT5A, FGFR1, ITGB3, SOX9, STARD13, SEMA5A, PTK2, MACF1, THBS1, BMP4, MET, TGFBR2, ITGA2, ITGA3, DOCK5, ANXA3, EPHA2, CORO1C, NOTCH1, SRPX2, ETS1, MAPK14, HBEGF, SH3BGRL3, HDAC9, KLF4	2.5	1.1e-10
GO:0044092	negative regulation of molecular function	209	8.9	CTTNBP2NL, LYPD1, NOG, PTPN22, AURKA, AURKB, AQP1, SHB, PICALM, CD44, SERPINE2, ILK, SERPINE1, PI16, WFDC10B, ROCK1, ROCK2, PIM1, FARP1, PLAUR, SPAG9, SERPINF1, WFDC2, WFDC3, DBNDD2, GNAI2, HFE, NFKBIA, PXK, SERPINH1, DUSP18, UBASH3B, HEXIM1, BMP4, PELI1, NCKAP1L, OXSR1, ECM1, CDC27, GAS6, NOTCH1, RGS4, PI3, TCAF2, ENG, KLF4, PPARA, FOXA2, CPEB2, LXN, PPARG, SPINK1, MITD1, RLIM, GTSE1, LATS2, EDN…	1.5	2.4e-10
GO:0060560	developmental growth involved in morphogenesis	60	2.6	NRP2, SYT1, PLXNA2, TRPV2, CRABP2, AURKA, L1CAM, IQGAP1, TGFB1, VCL, SPRY2, SPRY1, BDNF, S1PR1, TIAM1, SEMA7A, SEMA3E, ILK, SEMA3C, YAP1, SEMA3A, NRG1, FGF1, GOLGA4, RARG, MED12, SLIT2, FMN1, SEMA4F, SEMA4C, SEMA4B, WNT5A, PLXNC1, TNFRSF12A, TNC, CSF1, RIMS2, SOX9, ITGB1, CDH4, SEMA5A, MACF1, BCL11A, PAFAH1B1, PLXND1, DCLK1, FN1, FLRT3, BMP4, CPNE5, MAP1B, TGFBR2, NLGN3, RAPH1, NOTCH1, SEMA6B, CP…	2.3	1.6e-10
GO:0048666	neuron development	188	8	GPRIN1, MEF2C, SYT1, S100A6, NOG, MEF2A, PLXNA2, CRABP2, L1CAM, AURKA, ANKRD1, LPAR1, ITPKA, IQGAP1, TGFB2, SETX, VCL, NRCAM, BDNF, PICALM, ROBO1, TIAM1, GATA3, SEMA7A, ILK, IL15RA, CEP290, NEGR1, EGFR, RBFOX2, PTPRK, KIF5B, STMN3, PTPRG, EFNB2, NKX2-8, ENC1, FARP1, MAP4K4, SERPINF1, RASGRF1, NPTN, CLIP1, ANOS1, OPHN1, NFE2L2, PRDM1, SLITRK6, EXT1, LRRK2, PMP22, SLITRK5, WNT5A, FGFR1, PLXNC1, TNF…	1.5	2.7e-10
GO:0032268	regulation of cellular protein metabolic process	391	16.7	MEF2C, DLC1, FHIT, MAP3K7, SERPINE2, ISG15, CTGF, SERPINE1, ILK, PIK3CA, OGT, ADAM8, PIK3CG, ROCK1, ROCK2, CRTAP, HMG20A, MECOM, MYH9, PLAUR, SPAG9, MELTF, SERPINF1, F3, MST1R, WFDC2, WFDC3, TNFRSF6B, DBNDD2, GNAI2, HFE, NFKBIA, HSPA1A, SERPINH1, CTIF, DUSP18, RAC2, DYNAP, UBASH3B, HEXIM1, TGFBR1, TGFBR2, SPHK1, PIBF1, ATM, GAS6, RGS4, PI3, SMURF1, LXN, NUAK1, LATS2, KISS1, NOD1, SERPINA5, QKI, S…	1.3	3.6e-10
GO:0051049	regulation of transport	312	13.3	MEF2C, CTTNBP2NL, SYT1, SCN3A, PTGS2, EDN1, PTPN22, RANGAP1, AQP1, NOV, PICALM, SERPINE2, STAC, GAB2, RAE1, WNK4, SERPINE1, RAB23, CEP290, RAPGEF4, ADAM8, CRY1, PIK3CG, KIF5B, UGCG, CD40, VEGFC, UNC13D, CATSPER1, RGCC, STC1, TBC1D8B, CDK5R2, GNAI2, NFKBIE, GSDMD, CACNB1, NFKBIA, HFE, HSPA1A, PXK, CACNB4, RIMS2, LIF, SEMA5A, RAC2, HNMT, UBASH3B, NUP50, NKX2-5, IL1RAPL1, RHBDF2, BMP4, TRPC1, LGALS3…	1.4	3.6e-10
GO:0010605	negative regulation of macromolecule metabolic process	388	16.6	MEF2C, FHIT, MEF2A, SERPINE2, ISG15, CTGF, RAE1, FOXF2, SERPINE1, ILK, DHX34, PTBP3, OGT, PTPRK, ROCK1, ROCK2, RCOR1, CRTAP, HMG20A, DCAF1, MECOM, PLAUR, SERPINF1, WFDC2, WFDC3, DBNDD2, HFE, HSPA1A, SERPINH1, DUSP18, UBASH3B, HEXIM1, KLF12, KLF10, ASXL1, PIBF1, ATM, GAS6, SHOX2, RGS4, PI3, SMURF2, BACH1, CREBRF, ZNF488, FOXA2, LDLR, LXN, RLIM, LATS2, NOCT, SERPINA5, QKI, SERPINA1, MASTL, BHLHE41,…	1.3	3.7e-10
GO:0002682	regulation of immune system process	250	10.7	PVR, MEF2C, IL6ST, FSTL3, PTPN22, RORA, NOV, CFP, MAP3K7, SHB, ISG15, GAB2, HTRA1, SEMA7A, SERPINE1, CFH, PIK3CA, OGT, ADAM8, RARG, GBP5, EFNB2, CD40, PDCD1LG2, TANK, VEGFC, UNC13D, CAMK4, RGCC, PRDM1, NFKBIA, HFE, HSPA1A, LIF, RAC2, UBASH3B, DHX58, BMP4, PELI1, SPNS2, LGALS3, IL1RL1, CFB, LGALS1, KLF10, TGFBR2, SMAD3, NCKAP1L, PIBF1, SLAMF7, ECM1, ATM, GAS6, PTPN11, NCKAP1, NOTCH1, CD55, ETS1, C…	1.4	4.2e-10
GO:0016310	phosphorylation	373	15.9	MEF2C, MEF2A, NOG, ADCY7, IL6ST, EDN1, FAM20C, PTPN22, AURKA, AURKB, LPAR1, CLK1, MAP3K7, SHB, CD44, CTGF, SEMA7A, WNK4, ILK, PIK3CA, PELI2, OGT, CRY1, ADAM8, PIK3CG, ROCK1, ROCK2, PIM1, CD40, DCAF1, MECOM, PLAUR, NME4, SPAG9, VEGFC, CAMK4, RGCC, NPTN, MST1R, TNFRSF6B, CDK5R2, DBNDD2, GCNT2, GNAI2, PFKFB3, STK17B, AKAP13, HFE, AFAP1L2, CNTRL, STK17A, PXK, NAGK, EPHB2, LIF, DUSP18, DYNAP, RAC2, UB…	1.3	6e-10
GO:0032535	regulation of cellular component size	87	3.7	LIMA1, LRRC8A, HP1BP3, PLXNA2, TRPV2, EDN1, CRABP2, IQGAP3, ARHGAP18, L1CAM, FER, AQP1, NRCAM, ACTR2, BDNF, WDR36, GSN, SEMA7A, SEMA3E, ILK, TMSB15B, SEMA3C, SEMA3A, MSN, NRG1, GOLGA4, ANO6, ICAM1, HSP90AA1, RARG, ACTN2, TMSB10, PRKCE, MYADM, VASP, SLIT2, FMN1, PLEKHH2, SEMA4F, CFL2, FCHSD2, SEMA4C, FHOD3, SEMA4B, TMSB4X, FCHSD1, CSF3, WNT5A, PLXNC1, TNFRSF12A, ABI2, IL7R, CDH4, CCL26, CCL24, SEM…	2	3.7e-10
GO:1902533	positive regulation of intracellular signal transduction	179	7.6	S100A4, MEF2C, ZC3HAV1, PTGS2, IL6ST, PDGFA, IL18, EDN1, CSPG4, TNFSF15, TLR2, IQGAP3, PTPN22, TLR4, ANKRD1, IL15, PMAIP1, LPAR1, TLR6, TGFB1, IQGAP1, IL11, IL31RA, TGFB2, MAP3K7, GSTM2, CD44, MC1R, MDFIC, ROBO1, TIAM1, CTGF, GATA3, SEMA7A, ILK, SPRED2, PDGFC, PELI2, ASPH, PDGFD, SPRED1, ADAM8, EGFR, PIK3CG, ACTN4, BST2, SOCS3, CD40, SPAG9, PLCE1, RASGRF1, F3, PDE5A, NPTN, MST1R, LRRK2, WNT5A, TN…	1.6	5.2e-10
GO:0044087	regulation of cellular component biogenesis	162	6.9	DLC1, MEF2C, RAB3GAP2, SNCAIP, ZNF451, EDN1, TLR4, LPAR1, PMAIP1, TLR6, MMP1, IQGAP1, TGFB1, SETX, BDNF, S1PR1, TBC1D12, CTGF, LCAT, PLD1, GBP5, ROCK1, ROCK2, TRABD2A, TMSB10, SIX4, TBC1D22A, DCTN1, TACSTD2, SIX1, RGCC, FCHSD2, CLIP1, FCHSD1, PDCD6IP, SLITRK6, LRRK2, SLITRK5, WNT5A, SNX9, CAV1, SLF2, AKAP13, HSPA1A, ABCA1, SOX9, ZMYND8, EPHB2, CDC42EP2, PTK2, CDC42EP1, MACF1, RAC2, AGRN, CDC42EP3…	1.6	5.2e-10
GO:0045664	regulation of neuron differentiation	122	5.2	MEF2C, SYT1, PLXNA2, CRABP2, L1CAM, ANKRD1, LPAR1, ITPKA, IQGAP1, SETX, NRCAM, BDNF, BRINP2, TIAM1, ROBO1, GATA3, SEMA7A, ILK, IL15RA, NEGR1, ASPM, PTPRG, ENC1, HMG20A, MAP4K4, SPAG9, MIB1, SERPINF1, HOXD3, SIX1, NPTN, CLIP1, NFE2L2, LRRK2, PMP22, WNT5A, FGFR1, PLXNC1, TNFRSF12A, ASAP1, ULK4, RIMS2, TIMP2, SOX9, ZMYND8, EPHB2, SEMA5A, PTK2, MACF1, PTK6, OBSL1, SKIL, PLXND1, IL1RAPL1, NKX2-5, TMEM…	1.7	5e-10
GO:0000278	mitotic cell cycle	187	8	KIFC1, PRC1, BTRC, EDN1, IQGAP3, TTK, AURKA, AURKB, TGFB1, KANK2, SHB, RAD21, BRINP2, RAE1, INCENP, CDKN2D, CEP290, CCNA1, ASPM, STAG1, EGFR, PID1, CEP85, LIG1, PIM1, ESPL1, GPR132, GEM, OPTN, CEP152, PKIA, DCTN1, NABP1, SGO1, RGCC, PRDM5, CLIP1, PDCD6IP, CCDC8, SNX9, PAM, FGFR1, CAV2, KIF4A, BLM, TICRR, SLF2, ANLN, CEP164, CNTRL, TIMP2, ITGB1, WAPL, NIPBL, NUP50, FBXO43, OBSL1, HELLS, ERCC6L, MU…	1.5	6e-10
GO:0032880	regulation of protein localization	186	7.9	XPO1, LYPD1, PTGS2, XPO5, IL18, XPO4, TLR2, PTPN22, TLR4, RANGAP1, ANKRD1, PMAIP1, TLR6, IL17RA, TGFB1, IQGAP1, TGFB2, NOV, DAB2, BDNF, PICALM, MDFIC, TIAM1, GATA3, SLC2A1, RABGEF1, RAB23, CEP290, AFDN, RAPGEF4, ASPH, ADAM8, EGFR, PID1, IRS2, KIF5B, C2CD5, UGCG, ACTN2, ARNTL, SIX4, CD40, HLA-E, PKIA, IRS1, MAP4K4, VEGFC, SIX1, RGCC, NPTN, PAEP, LRRK2, SSC5D, GBP1, WNT5A, PAM, NFKBIE, GSDMD, HFE, …	1.5	6.2e-10
GO:0010770	positive regulation of cell morphogenesis involved in differentiation	51	2.2	TRPV2, CRABP2, L1CAM, ITPKA, TGFB1, TGFB2, DAB2, BDNF, TIAM1, ROBO1, SEMA7A, PAX8, ILK, NRG1, GOLGA4, LEF1, MYADM, SLIT2, FLNA, UNC13D, CRKL, RGCC, HAS2, TGFB1I1, ACVR1, GCNT2, TNFRSF12A, TCF7L2, CDH4, SEMA5A, LIF, MACF1, BCL11A, OBSL1, PAFAH1B1, BCL9L, SKIL, IL1RAPL1, FN1, BMP2, TGFBR1, MAP1B, TGFBR2, S100A10, SMAD3, WWTR1, DOCK5, SHOX2, EPHA4, NOTCH1, ENG	2.5	3.5e-10
GO:0010810	regulation of cell-substrate adhesion	54	2.3	DLC1, EDIL3, SDC4, IQGAP1, SLK, SERPINE1, ILK, SEMA3E, CYR61, ROCK1, ACTN4, ROCK2, CDK6, PRKCE, MMP14, MYADM, NDNF, FLNA, FMN1, PPM1F, VEGFC, UNC13D, CRKL, MELTF, TACSTD2, HAS2, GBP1, GCNT2, CSF1, HACD1, CCL28, ABI3BP, PTK2, RAC2, MACF1, PTN, THBS1, COL8A1, RASA1, FN1, LGALS1, CCDC80, S100A10, SMAD3, ITGA3, DOCK5, FZD4, FZD7, CORO1C, NOTCH1, ITGA6, ITGA5, PHLDB2, PLAU	2.4	3.7e-10
GO:1901701	cellular response to oxygen-containing compound	178	7.6	MEF2C, LYPD1, GNA15, PTGS2, ADCY7, IL18, EDN1, TLR2, PTPN22, TLR4, RANGAP1, ANKRD1, IL15, RORA, LPAR1, AQP1, TGFB1, KANK2, SETX, ATP2B1, BRINP2, SERPINE1, PDE4B, PIK3CA, PDGFC, OGT, PDGFD, EGFR, PIK3CG, PID1, PTPRK, IRS2, RARG, KIF5B, SOCS3, ROCK2, C2CD5, PIM1, UBR2, ACTN2, PDE4D, CD40, IRS1, DDIT4, MAP4K4, SERPINF1, STC1, NFE2L2, PRDM1, LRRK2, TNFAIP3, WNT5A, CAV2, CAV1, WNT5B, BLM, GNAI2, GNAI1…	1.5	7.1e-10
GO:0045321	leukocyte activation	152	6.5	MEF2C, MICB, IL6ST, IL18, EDN1, TLR2, PTPN22, TLR4, IL15, RORA, TLR6, TGFB1, IL11, IL31RA, MAP3K7, SHB, GAB2, GATA3, RABGEF1, IL15RA, PIK3CA, ADAM8, EBI3, PIK3CG, SATB1, IRS2, BST2, BST1, EFNB2, RELB, HLA-A, LIG4, CD40, HLA-E, MYH9, DCAF1, AHR, PDCD1LG2, DCLRE1C, HHEX, UNC13D, CAMK4, PDE5A, PRDM1, TNFAIP3, WNT5A, CAV1, ADORA2B, HFE, ITGB2, ITGB1, DOCK2, RAC2, NDRG1, TRAF6, RUNX2, HELLS, BMP4, KLF…	1.6	6.9e-10
GO:0001819	positive regulation of cytokine production	92	3.9	IL27RA, ZC3HAV1, PTGS2, IL6ST, IL18, TLR2, PTPN22, TLR4, IL15, RORA, TLR6, TGFB1, IL17RA, MAP3K7, TMEM173, NOD1, HPSE, SAA1, GATA3, SEMA7A, TRIM6, DDX60, IL4R, PDE4B, SERPINE1, IL1RAP, CCBE1, ADAM8, PLCB1, LTB, AKIRIN2, EBI3, EGR1, ARHGEF2, GBP5, PTGER4, LY96, PRG2, HLA-A, PDE4D, CD40, IFI16, NLRP3, HLA-E, NLRP1, CD83, CARD11, EREG, MB21D1, RIPK1, RGCC, IL12A, ADAM17, PAEP, WNT5A, CSF2, IFIH1, AD…	1.9	6.4e-10
GO:0071357	cellular response to type I interferon	31	1.3	WNT5A, IFITM1, IFITM2, IFITM3, OAS3, OAS1, OAS2, ISG20, NLRC5, ISG15, TRIM6, XAF1, MX2, EGR1, SP100, BST2, HLA-A, SAMHD1, HLA-B, STAT1, HLA-E, PSMB8, IRF9, IFIT3, IFIT2, OASL, IFIT1, IFI27, IRF1, JAK1, GBP2	3.3	2.9e-10
GO:0060337	type I interferon signaling pathway	31	1.3	WNT5A, IFITM1, IFITM2, IFITM3, OAS3, OAS1, OAS2, ISG20, NLRC5, ISG15, TRIM6, XAF1, MX2, EGR1, SP100, BST2, HLA-A, SAMHD1, HLA-B, STAT1, HLA-E, PSMB8, IRF9, IFIT3, IFIT2, OASL, IFIT1, IFI27, IRF1, JAK1, GBP2	3.3	2.9e-10
GO:0050900	leukocyte migration	90	3.8	MMP9, EDN1, L1CAM, FER, SLC7A5, MMP1, TGFB1, IL17RA, TGFB2, NOV, EDNRB, S1PR1, CD44, CXCR4, SAA1, GATA3, CH25H, PDE4B, SERPINE1, RABGEF1, PIK3CA, ESAM, PDGFD, MSN, ADAM8, PLCB1, ANO6, CEACAM1, PIK3CG, ICAM1, ROCK1, PTGER4, MPP1, PDE4D, MYH9, SIRPA, SLIT2, VEGFC, THBD, IL12A, ADAM17, PROS1, CAMK1D, WNT5A, CXCL1, CAV1, CSF1, CXCL3, STK10, C5, GPSM3, CXCL2, CXCL8, ITGB2, ITGB3, CCL28, ITGB1, CCL26, …	1.9	7.8e-10
GO:0007265	Ras protein signal transduction	80	3.4	GNA13, RHOJ, DLC1, IQGAP3, LPAR1, TGFB2, SPRY2, SPRY1, ARHGAP5, TIAM2, ROBO1, TIAM1, RABGEF1, ARHGEF40, OGT, NRG1, SHC3, RHOG, CHUK, ALS2CL, KIF14, RAP2A, ARHGEF3, ARHGEF2, PLD1, ARHGEF1, ROCK1, STMN3, ROCK2, ARHGEF18, FBP1, RB1, ARHGAP29, ECT2, FARP1, ARHGEF10, DOK1, PLCE1, CRKL, RASGRF1, GPR17, KSR1, RALGPS2, ARHGEF28, CSF1, CYTH4, ABI2, AKAP13, MYO9B, ABCA1, ARFGEF2, TIMP2, ITGB1, RASAL2, PLEK…	2	8e-10
GO:0019221	cytokine-mediated signaling pathway	120	5.1	IL6ST, OSMR, IL18, EDN1, TNFSF15, IL17RE, TNFSF12, IL17RD, IL17RA, ISG20, IL31RA, NLRC5, CD44, ISG15, ROBO1, CCR10, RABGEF1, IL15RA, MX2, EBI3, BST2, SOCS3, HLA-A, SOCS4, HLA-B, CD40, HLA-E, F3, MST1R, TNFAIP3, GBP2, GBP1, TRAF1, WNT5A, TNFRSF6B, CAV1, IFITM1, IFITM2, TNFRSF12A, IFITM3, OAS3, IFI30, OAS1, HSPA1A, OAS2, IRAK3, TRAF6, IL1RL1, SPHK1, ECM1, PSMB8, GAS6, PTPN11, PSMB9, OASL, IFI27, CP…	1.7	1e-09
GO:0009892	negative regulation of metabolic process	412	17.6	MEF2C, FHIT, MEF2A, ISG15, SERPINE2, CTGF, RAE1, FOXF2, SERPINE1, ILK, DHX34, PTBP3, OGT, PIK3CG, PTPRK, ROCK1, ROCK2, RCOR1, CRTAP, HMG20A, DCAF1, MECOM, PLAUR, SERPINF1, WFDC2, WFDC3, DBNDD2, GNAI2, HFE, HSPA1A, SERPINH1, DUSP18, LPCAT1, UBASH3B, HEXIM1, KLF12, KLF10, ASXL1, PIBF1, ATM, GAS6, SHOX2, RGS4, PI3, SMURF2, BACH1, CREBRF, ZNF488, FOXA2, LDLR, LXN, RLIM, LATS2, NOCT, SERPINA5, QKI, SE…	1.3	1.4e-09
GO:0009628	response to abiotic stimulus	195	8.3	XRCC4, PTGS2, EDN1, PDLIM1, LPAR1, AURKB, RORA, AQP1, ATP2B1, USP53, MC1R, STAC, SERPINE2, CTGF, PLOD2, ADAM8, CRY1, SLC12A6, PTPRK, LIG4, CD40, TANK, DCLRE1C, VEGFC, SERPINF1, RGCC, NPTN, STC1, TGFB1I1, ZNF516, TICRR, NFKBIA, HSPA1A, SLC29A1, HNMT, COL18A1, PLAT, BMP2, MKI67, TGFBR2, SMAD3, OXSR1, ATM, NOTCH1, KCNJ8, ETS1, ENG, PLAU, BACH1, PPARA, CPEB2, LXN, TRPV2, PPARG, GJA1, EDNRA, BAG3, FGF…	1.5	1.3e-09
GO:0007169	transmembrane receptor protein tyrosine kinase signaling pathway	135	5.8	NOG, PDGFA, MMP9, CSPG4, IQGAP1, TGFB1, IL31RA, SETX, SHB, BDNF, GAB2, TIAM1, CTGF, GATA3, CCBE1, RABGEF1, SPRED2, PIK3CA, PDGFC, PDGFD, SPRED1, EGFR, PID1, RBFOX2, IRS2, NCF2, ROCK1, PTPRG, SOCS3, ROCK2, C2CD5, EFNB2, SOCS4, IRS1, DDIT4, PLAUR, VEGFC, HHEX, PLCE1, F3, NPTN, ANOS1, MST1R, MVP, WNT5A, FGFR1, CAV2, ARHGEF28, AFAP1L2, ITGB3, ESM1, SOX9, EPHB2, PTK2, PTK6, ITGAV, RHBDF2, PLAT, BMP2, …	1.7	1.3e-09
GO:0030855	epithelial cell differentiation	121	5.2	MEF2C, FAM20C, IQGAP1, TGFB1, IL31RA, S1PR3, DAB2, S1PR1, MCOLN3, GATA3, PLOD3, AFDN, FNDC3A, RARG, ROCK1, ROCK2, SIX2, SIPA1L3, PDE4D, BASP1, ARNTL, STK4, HHEX, VSIG1, TAGLN, KRT16, MCIDAS, SIX1, STC1, PRDM1, SLITRK6, WNT5A, FGFR1, CAV1, WNT5B, TDRD7, SOX9, LIF, PTK6, HEG1, NKX2-1, SKIL, VEZF1, MUC1, COL18A1, KLF5, BMP4, MAFF, BMP2, LGALS3, PODXL, MYO1E, MET, SMAD3, ITGA2, NKX6-1, EPHA2, NOTCH1,…	1.7	1.4e-09
GO:0031399	regulation of protein modification process	289	12.3	MEF2C, DLC1, RAB3GAP2, NOG, ADCY7, IL6ST, EDN1, PTPN22, LPAR1, MAP3K7, SHB, CD44, ISG15, CTGF, SEMA7A, ILK, PIK3CA, PELI2, OGT, ADAM8, CRY1, PIK3CG, ROCK1, ROCK2, TRABD2A, CRTAP, PIM1, HMG20A, CD40, MECOM, TANK, PLAUR, VEGFC, SPAG9, RGCC, NPTN, MST1R, TNFRSF6B, CDK5R2, DBNDD2, GCNT2, GNAI2, HFE, AKAP13, HSPA1A, AFAP1L2, LIF, DUSP18, DYNAP, RAC2, UBASH3B, HEXIM1, BMP4, BMP2, PELI1, TGFBR1, TGFBR2,…	1.4	1.8e-09
GO:0033043	regulation of organelle organization	213	9.1	DLC1, MEF2C, RAB3GAP2, SYT1, EDN1, AURKA, LPAR1, AURKB, S1PR1, VPS13C, CTGF, ILK, OGT, ROCK1, KIF5B, PLD6, ROCK2, UGCG, ESPL1, LIG4, DCTN1, PLAUR, UHRF1, UHRF2, TACSTD2, RGCC, FCHSD2, FCHSD1, TBC1D8B, AKAP13, HSPA1A, SEMA5A, LIF, CDC42EP2, CDC42EP1, HNMT, RAC2, OBSL1, CDC42EP3, BMP4, MKI67, TP53BP2, TGFBR1, SMAD3, S100A10, NCKAP1L, ALMS1, CELSR1, CDC27, ATM, NCKAP1, CCT7, CCT4, EPS8, TMOD3, LIMA1…	1.5	1.9e-09
GO:0023056	positive regulation of signaling	274	11.7	S100A4, MEF2C, SYT1, PTGS2, IL6ST, EDN1, PTPN22, LPAR1, NOV, MAP3K7, SHB, BDNF, CD44, SERPINE2, MC1R, CTGF, SEMA7A, CCBE1, ILK, PELI2, ADAM8, PIK3CG, KIF5B, CD40, PLAUR, SPAG9, F3, NPTN, MST1R, TGFB1I1, TNFRSF6B, PPP2R3A, GCNT2, GNAI2, AKAP12, HFE, AKAP13, AFAP1L2, HSPA1A, ESM1, RIMS2, LIF, SEMA5A, MACF1, HEXIM1, DHX58, BMP4, ASXL2, BMP2, PELI1, TP53BP2, LGALS1, TGFBR1, SPHK1, ASXL1, SMAD3, PIBF1…	1.4	2e-09
GO:0048598	embryonic morphogenesis	122	5.2	MEF2C, DLC1, NOG, MMP9, EDN1, CRABP2, LUZP1, TGFB1, MTHFD1L, TGFB2, GATA3, FOXF2, CEP290, COL12A1, SATB2, RARG, SOCS3, MYH3, MED12, SIX2, SIX4, STK4, VEGFC, HHEX, MIB1, HOXD3, SIX1, HOXD4, LNPK, MFAP2, SLITRK6, EXT1, FRAS1, WNT5A, FGFR1, ITGB4, ITGB2, ITGB3, SOX9, ITGB1, EPHB2, LAMB3, ECE1, NIPBL, ITGAV, TRAF6, LAMB1, RUNX2, NKX2-5, FN1, BMP4, TGFBR1, TGFBR2, EFEMP1, SMAD3, ITGA2, TEAD2, ITGA3, C…	1.7	1.8e-09
GO:0031347	regulation of defense response	139	5.9	PVR, MEF2C, MICB, PTGS2, ZC3HAV1, IL6ST, OSMR, IL18, BTRC, TLR2, PTPN22, TLR4, IL15, RORA, TLR6, TGFB1, IL17RA, NOV, CFP, MAP3K7, NLRC5, HTRA1, GATA3, SEMA7A, SERPINE1, CFH, RABGEF1, ADAM8, COCH, EGFR, PIK3CG, GBP5, SOCS3, RELB, HLA-A, HLA-B, HLA-E, TANK, SERPINF1, TNFAIP3, WNT5A, IFIH1, CAV1, ADORA2B, NFKBIA, HSPA1A, ITGB2, IRAK3, DOCK2, TRAF6, DHX58, PELI1, CFB, IL1RL1, ERBIN, SMAD3, ITGA2, PSM…	1.6	1.9e-09
GO:0051247	positive regulation of protein metabolic process	265	11.3	DLC1, MEF2C, RAB3GAP2, ADCY7, IL6ST, EDN1, PTPN22, RNF217, AURKA, LPAR1, MAP3K7, PICALM, CD44, CTGF, SEMA7A, CCBE1, ILK, PIK3CA, PELI2, OGT, ADAM8, PIK3CG, ROCK2, TRABD2A, PIM1, CD40, MYH9, TANK, PLAUR, VEGFC, SPAG9, UHRF1, MELTF, F3, RGCC, NPTN, MST1R, TNFRSF6B, CDK5R2, PPP2R3A, GCNT2, GNAI2, NFKBIA, HFE, AKAP13, AFAP1L2, HSPA1A, LIF, LPCAT1, DYNAP, BMP4, BMP2, PELI1, TGFBR1, SPHK1, TGFBR2, SMAD…	1.4	3.1e-09
GO:1903827	regulation of cellular protein localization	120	5.1	LYPD1, XPO1, PTGS2, XPO5, IL18, XPO4, TLR2, PTPN22, RANGAP1, TLR4, PMAIP1, TGFB1, IQGAP1, TGFB2, NOV, BDNF, DAB2, MDFIC, RAB23, CEP290, ASPH, EGFR, PID1, KIF5B, C2CD5, UGCG, ACTN2, PKIA, NPTN, LRRK2, GBP1, WNT5A, NFKBIE, HFE, NFKBIA, ZMYND8, ITGB1, SEMA5A, LIF, WAPL, HNMT, RAC2, SH3TC2, TMEM30A, BMP4, TP53BP2, TGFBR1, SPHK1, PTPN14, SMAD3, ITGA3, GAS6, EPHA2, PTPN11, DDX58, CCT7, NMT1, IFI27, CCT…	1.7	2.5e-09
GO:0045936	negative regulation of phosphate metabolic process	117	5	NOG, STK38, PDGFA, EDN1, PTPN22, TLR4, LPAR1, TGFB1, IQGAP1, TGFB2, SHB, CDKN2D, ILK, SPRED2, RABGEF1, RNF149, SPRED1, PID1, CEP85, IRS2, ROCK1, SOCS3, ROCK2, FBP1, SOCS4, PDE4D, MECOM, SPOCD1, PKIA, FARP1, DDIT4, HHEX, LRRK2, TNFAIP3, GBP1, CCDC8, MVP, CAV1, DBNDD2, GNAI2, LIF, DUSP18, IRAK3, UBASH3B, HEXIM1, PTK6, CDA, BMP4, MPHOSPH10, NCKAP1L, PIBF1, CORO1C, RGS4, ENG, KLF4, PPARA, FOXA2, GABB…	1.7	2.6e-09
GO:0010563	negative regulation of phosphorus metabolic process	117	5	NOG, STK38, PDGFA, EDN1, PTPN22, TLR4, LPAR1, TGFB1, IQGAP1, TGFB2, SHB, CDKN2D, ILK, SPRED2, RABGEF1, RNF149, SPRED1, PID1, CEP85, IRS2, ROCK1, SOCS3, ROCK2, FBP1, SOCS4, PDE4D, MECOM, SPOCD1, PKIA, FARP1, DDIT4, HHEX, LRRK2, TNFAIP3, GBP1, CCDC8, MVP, CAV1, DBNDD2, GNAI2, LIF, DUSP18, IRAK3, UBASH3B, HEXIM1, PTK6, CDA, BMP4, MPHOSPH10, NCKAP1L, PIBF1, CORO1C, RGS4, ENG, KLF4, PPARA, FOXA2, GABB…	1.7	2.6e-09
GO:0023014	signal transduction by protein phosphorylation	170	7.3	MEF2C, MEF2A, STK38, PDGFA, IL18, BTRC, EDN1, CSPG4, IQGAP3, PTPN22, TLR4, LPAR1, TLR6, IL17RD, TGFB1, IQGAP1, IL11, IL31RA, TGFB2, SETX, MAP3K7, CD44, MDFIC, TIAM1, CTGF, SEMA7A, ILK, SPRED2, PDGFC, PELI2, RNF149, PDGFD, SPRED1, ADAM8, EGFR, PIK3CG, IRS2, ACTN2, CD40, MECOM, IRS1, STK4, MAP4K4, SPAG9, PLCE1, RASGRF1, PDE5A, NPTN, MST1R, LRRK2, GBP1, WNT5A, TNFRSF6B, FGFR1, CAV2, CAV1, GCNT2, GNA…	1.5	3e-09
GO:0043549	regulation of kinase activity	156	6.7	MEF2C, STK38, ADCY7, PDGFA, IL18, EDN1, CSPG4, TNFSF15, IQGAP3, PTPN22, TLR4, LPAR1, TLR6, TGFB1, IQGAP1, TGFB2, MAP3K7, NLRC5, SHB, CD44, MDFIC, TIAM1, CDKN2D, ILK, SPRED2, PIK3CA, PDGFC, PDGFD, SPRED1, ADAM8, EGFR, PIK3CG, CEP85, IRS2, SOCS3, RBL1, PIM1, SOCS4, CD40, PKIA, IRS1, STK4, HHEX, SPAG9, PLCE1, RGCC, PDE5A, MST1R, LRRK2, TNFAIP3, MVP, WNT5A, SNX9, FGFR1, CAV1, DBNDD2, CDK5R2, BLM, GNA…	1.6	3.1e-09
GO:0006793	phosphorus metabolic process	488	20.8	MEF2C, PDP1, DLC1, FHIT, MEF2A, CLK1, RORA, MAP3K7, MC1R, CTGF, ILK, PIK3CA, OGT, ADAM8, PIK3CG, PTPRK, PDPR, ROCK1, PTPRG, ROCK2, PTPRH, MYH3, DCAF1, MECOM, LPCAT2, LPCAT4, PLAUR, NME4, SPAG9, MST1R, TNFRSF6B, PPP2R3A, DBNDD2, GNAI2, ACP7, HFE, HSPA1A, CNTRL, DUSP11, NAGK, DUSP18, PPP1R3C, DYNAP, RAC2, LPCAT1, HEXIM1, UBASH3B, EFR3A, GPD2, TGFBR1, SPHK1, TGFBR2, PIBF1, ATM, GAS6, RGS4, AREG, FGF…	1.3	4.4e-09
GO:0006796	phosphate-containing compound metabolic process	487	20.8	MEF2C, PDP1, DLC1, FHIT, MEF2A, CLK1, RORA, MAP3K7, MC1R, CTGF, ILK, PIK3CA, OGT, ADAM8, PIK3CG, PTPRK, PDPR, ROCK1, PTPRG, ROCK2, PTPRH, MYH3, DCAF1, MECOM, LPCAT2, LPCAT4, PLAUR, NME4, SPAG9, MST1R, TNFRSF6B, PPP2R3A, DBNDD2, GNAI2, ACP7, HFE, HSPA1A, CNTRL, DUSP11, NAGK, DUSP18, PPP1R3C, DYNAP, RAC2, LPCAT1, HEXIM1, UBASH3B, EFR3A, GPD2, TGFBR1, SPHK1, TGFBR2, PIBF1, ATM, GAS6, RGS4, AREG, FGF…	1.3	4.3e-09
GO:0060341	regulation of cellular localization	163	7	MEF2C, XPO1, LYPD1, KCNC4, SNCAIP, PTGS2, XPO5, IL18, XPO4, TLR2, PTPN22, RANGAP1, TLR4, PMAIP1, TGFB1, IQGAP1, TGFB2, NOV, GSTM2, BDNF, DAB2, ANK2, GAB2, MDFIC, TIAM1, RABGEF1, RAB23, CEP290, ASPH, MX2, EGFR, PID1, KIF5B, BST2, C2CD5, UGCG, ACTN2, PDE4D, PKIA, MAP4K4, UNC13D, NPTN, LRRK2, GBP1, WNT5A, CAV1, ADORA2B, NFKBIE, HFE, NFKBIA, RIMS2, ITGB1, ZMYND8, SEMA5A, LIF, WAPL, RAC2, HNMT, UBASH3…	1.6	3.5e-09
GO:0009615	response to virus	77	3.3	MEF2C, MICB, ZC3HAV1, PTPN22, IFI44L, IL15, PMAIP1, APOBEC3C, ISG20, APOBEC3D, NLRC5, TMEM173, AP1S2, ISG15, CXCR4, HTRA1, GATA3, TRIM6, DDX60, DDX21, FOSL1, MX2, CHUK, BATF3, BST2, HLA-A, HERC5, IFI44, CDK6, IFI16, CD40, NLRP3, HMGA2, HMGA1, DDIT4, UNC13D, MB21D1, IL12A, MST1R, TNFAIP3, GBP3, GBP1, IFIH1, AP1M1, IFITM1, IFITM2, IFITM3, OAS3, PML, OAS1, OAS2, IVNS1ABP, SEC14L1, IRAK3, DOCK2, BCL3…	2	2.7e-09
GO:0051248	negative regulation of protein metabolic process	196	8.4	FHIT, NOG, EDN1, PTPN22, AQP1, SHB, PICALM, ISG15, SERPINE2, CD44, SERPINE1, ILK, OGT, CRY1, PI16, WFDC10B, ROCK1, ROCK2, CRTAP, HMG20A, MECOM, PLAUR, SERPINF1, WFDC2, WFDC3, DBNDD2, HFE, IGF2BP2, HSPA1A, IGF2BP3, SERPINH1, LIF, DUSP18, HEXIM1, UBASH3B, BMP4, PLAT, NCKAP1L, SMAD3, PIBF1, ECM1, CDC27, GAS6, CD55, CD59, RGS4, PI3, ENG, KLF4, NCOR2, CPEB2, LXN, SPINK1, LATS2, EDNRB, HSPH1, SERPINA5,…	1.5	3.8e-09
GO:0034340	response to type I interferon	31	1.3	WNT5A, IFITM1, IFITM2, IFITM3, OAS3, OAS1, OAS2, ISG20, NLRC5, ISG15, TRIM6, XAF1, MX2, EGR1, SP100, BST2, HLA-A, SAMHD1, HLA-B, STAT1, HLA-E, PSMB8, IRF9, IFIT3, IFIT2, OASL, IFIT1, IFI27, IRF1, JAK1, GBP2	3.2	1.4e-09
GO:0051707	response to other organism	162	6.9	MEF2C, MICB, PTGS2, ZC3HAV1, IL18, EDN1, TLR2, PTPN22, TLR4, ANKRD1, IL15, PMAIP1, TLR6, APOBEC3C, IL17RA, TGFB1, IL31RA, ISG20, APOBEC3D, CFP, NLRC5, ISG15, HTRA1, GATA3, SERPINE1, PDE4B, DDX21, MX2, AKIRIN2, COCH, BST2, HLA-A, PDE4D, IFI44, HLA-B, OPTN, CD40, HLA-E, JUNB, DDIT4, THBD, UNC13D, MST1R, PRDM1, TNFAIP3, GBP3, SSC5D, GBP1, WNT5A, TNFRSF6B, IFIH1, CAV1, IFITM1, IFITM2, IFITM3, GSDMD, …	1.6	4e-09
GO:0043207	response to external biotic stimulus	162	6.9	MEF2C, MICB, PTGS2, ZC3HAV1, IL18, EDN1, TLR2, PTPN22, TLR4, ANKRD1, IL15, PMAIP1, TLR6, APOBEC3C, IL17RA, TGFB1, IL31RA, ISG20, APOBEC3D, CFP, NLRC5, ISG15, HTRA1, GATA3, SERPINE1, PDE4B, DDX21, MX2, AKIRIN2, COCH, BST2, HLA-A, PDE4D, IFI44, HLA-B, OPTN, CD40, HLA-E, JUNB, DDIT4, THBD, UNC13D, MST1R, PRDM1, TNFAIP3, GBP3, SSC5D, GBP1, WNT5A, TNFRSF6B, IFIH1, CAV1, IFITM1, IFITM2, IFITM3, GSDMD, …	1.6	4e-09
GO:0010647	positive regulation of cell communication	271	11.6	S100A4, MEF2C, SYT1, PTGS2, IL6ST, EDN1, PTPN22, LPAR1, NOV, MAP3K7, SHB, BDNF, CD44, SERPINE2, MC1R, CTGF, SEMA7A, CCBE1, ILK, PELI2, ADAM8, PIK3CG, KIF5B, CD40, PLAUR, SPAG9, F3, NPTN, MST1R, TGFB1I1, TNFRSF6B, PPP2R3A, GCNT2, GNAI2, AKAP12, HFE, AKAP13, AFAP1L2, HSPA1A, ESM1, RIMS2, LIF, SEMA5A, MACF1, HEXIM1, DHX58, BMP4, ASXL2, BMP2, PELI1, TP53BP2, LGALS1, TGFBR1, SPHK1, ASXL1, SMAD3, PIBF1…	1.4	4.6e-09
GO:0050673	epithelial cell proliferation	83	3.5	MEF2C, NRP2, NOG, BTRC, IQGAP3, FERMT1, GJA1, TNFSF12, TGFB1, TGFB2, NOV, OSR1, HTRA1, ROBO1, GATA3, YAP1, FGF1, LOXL2, AGAP2, ERRFI1, CEACAM1, ZFP36, PRKCA, EGFR, PTPRK, EFNB2, NKX2-8, CDK6, RB1, HMGA2, MMP14, WDR48, VEGFC, EREG, SERPINF1, F3, RGCC, HAS2, MCC, TNFAIP3, WNT5A, CAV2, CAV1, LIMS2, ITGB3, SFN, SOX9, CCL26, STAT6, CCL24, ZFP36L1, SEMA5A, NR1D1, PTN, SDR16C5, COL8A1, LAMB1, THBS1, ETV…	1.9	3.7e-09
GO:0048812	neuron projection morphogenesis	116	5	SYT1, MEF2A, S100A6, NOG, PLXNA2, CRABP2, L1CAM, AURKA, ITPKA, IQGAP1, TGFB2, VCL, NRCAM, BDNF, PICALM, TIAM1, ROBO1, GATA3, SEMA7A, ILK, EGFR, RBFOX2, KIF5B, EFNB2, NKX2-8, FARP1, OPHN1, ANOS1, SLITRK6, LRRK2, EXT1, SLITRK5, WNT5A, PLXNC1, TNFRSF12A, RIMS2, ITGB1, EPHB2, SEMA5A, PTK2, MACF1, OBSL1, NKX2-1, B3GNT2, SKIL, PLXND1, IL1RAPL1, FN1, KLF7, CPNE5, NR4A2, NTN4, ITGA1, SHANK1, NKX6-1, PTPN…	1.7	4.5e-09
GO:0045859	regulation of protein kinase activity	146	6.2	MEF2C, STK38, ADCY7, PDGFA, IL18, EDN1, CSPG4, TNFSF15, IQGAP3, PTPN22, TLR4, LPAR1, TLR6, TGFB1, IQGAP1, TGFB2, MAP3K7, SHB, MDFIC, TIAM1, CDKN2D, ILK, SPRED2, PIK3CA, PDGFC, PDGFD, SPRED1, ADAM8, EGFR, PIK3CG, CEP85, SOCS3, PIM1, SOCS4, CD40, PKIA, STK4, HHEX, SPAG9, PLCE1, RGCC, PDE5A, MST1R, LRRK2, TNFAIP3, MVP, WNT5A, SNX9, FGFR1, CAV1, DBNDD2, CDK5R2, BLM, GNAI2, ADORA2B, AKAP13, AFAP1L2, I…	1.6	5e-09
GO:1902532	negative regulation of intracellular signal transduction	101	4.3	DLC1, STK38, MMP9, PTPN22, TLR4, RORA, TGFB2, NOV, GSTM2, CD44, SERPINE2, CDKN2D, SPRED2, RABGEF1, CREB3L1, RNF149, SPRED1, STMN3, SOCS3, FBP1, UBR2, SOCS4, ARNTL, OPTN, MECOM, TANK, DDIT4, PLAUR, NFE2L2, TNFAIP3, LRRK2, GBP1, CAV1, TNFAIP8L1, MCL1, NFKBIA, HSPA1A, TIMP2, ITGB1, LIF, RASAL2, IRAK3, DUSP18, HELLS, DHX58, BMP4, MUC1, CARD8, IL1RL1, ERBIN, PIBF1, ITGA3, EPHA2, ATM, RGS4, CPNE1, KLF4…	1.8	5e-09
GO:0009607	response to biotic stimulus	168	7.2	PVR, MEF2C, MICB, PTGS2, ZC3HAV1, IL18, EDN1, TLR2, PTPN22, TLR4, ANKRD1, IL15, PMAIP1, TLR6, APOBEC3C, IL17RA, TGFB1, IL31RA, ISG20, APOBEC3D, CFP, NLRC5, ISG15, HTRA1, GATA3, SERPINE1, PDE4B, DDX21, MX2, AKIRIN2, COCH, BST2, HLA-A, PDE4D, IFI44, HLA-B, OPTN, CD40, HLA-E, JUNB, DDIT4, THBD, UNC13D, MST1R, PRDM1, TNFAIP3, GBP3, SSC5D, GBP1, WNT5A, TNFRSF6B, IFIH1, CAV1, IFITM1, IFITM2, IFITM3, GS…	1.5	6.4e-09
GO:0007264	small GTPase mediated signal transduction	113	4.8	GNA13, DLC1, RAB9B, RGL3, IQGAP3, RRAD, LPAR1, TGFB2, TIAM2, TIAM1, ROBO1, RAB23, RABGEF1, ARHGEF40, RAPGEF4, OGT, PLD1, STMN3, ROCK1, ROCK2, RAP1GDS1, FBP1, GEM, FARP1, RND3, PLCE1, RASGRF1, LRRK2, RALGPS2, ARHGEF28, AKAP13, MYO9B, ABCA1, TIMP2, ARFGEF2, ITGB1, RASAL2, CDC42EP2, DOCK2, CDC42EP1, RAC2, RHOBTB1, CDC42EP3, FGD6, RHEBL1, ARHGDIB, RAB8B, DOCK9, TRIO, ITGA3, CELSR1, DOCK5, DNMBP, DOCK…	1.7	5.7e-09
GO:0002064	epithelial cell development	58	2.5	FOSL2, ARID4A, MYO7A, ARID4B, GJA1, IQGAP1, S1PR3, FRMD6, GATA3, PLOD3, PAX8, AFDN, MSN, FNDC3A, ICAM1, RARG, ROCK1, ROCK2, SIX2, SIPA1L3, PDE4D, CDK6, BASP1, MYADM, FLNB, VSIG1, CLIC4, STC1, PRDM1, SLITRK6, WNT5A, FGFR1, WNT5B, VIM, SFN, SOX9, LIF, EZR, PPP1R12A, HEG1, PAFAH1B1, VEZF1, BMP4, KLF5, COL18A1, MYO1E, PODXL, MET, STAT1, EPHA2, FZD7, NKX6-1, ATRX, NOTCH1, PDE2A, ID1, ENG, TJP2	2.2	4.3e-09
GO:0032269	negative regulation of cellular protein metabolic process	186	7.9	CAST, FHIT, NOG, STK38, XPO5, MMP9, EDN1, ZNF451, PTPN22, TLR4, AQP1, TGFB1, SHB, PICALM, CD44, SERPINE2, ISG15, CDKN2D, ILK, SERPINE1, RABGEF1, SPRED2, RNF149, OGT, SPRED1, PI16, CRY1, TFPI2, SAMD4A, EGFR, PID1, WFDC10B, CEP85, ROCK1, BST2, ROCK2, SOCS3, CRTAP, ENC1, HMG20A, CST1, SOCS4, PDE4D, MECOM, PKIA, DDIT4, PLAUR, HHEX, SERPINF1, ANXA8L1, CST4, ANOS1, OPHN1, LRRK2, TNFAIP3, WFDC2, GBP1, M…	1.5	7.7e-09
GO:0045666	positive regulation of neuron differentiation	76	3.2	MEF2C, SYT1, TRPV2, CRABP2, L1CAM, ANKRD1, LPAR1, ZEB1, ITPKA, IQGAP1, SETX, NRCAM, BDNF, BRINP2, ROBO1, TIAM1, SEMA7A, ILK, IL1RAP, NRG1, NEGR1, GOLGA4, ENC1, ECT2, NDNF, SLIT2, SPAG9, SERPINF1, HOXD3, NPTN, CLIP1, CNTN1, NFE2L2, CAMK1D, WNT5A, FGFR1, TNFRSF12A, RIMS2, TIMP2, CDH4, ZMYND8, SCARF1, SEMA5A, MACF1, PTK6, BCL11A, PTN, OBSL1, PAFAH1B1, SKIL, IL1RAPL1, ETV5, NKX2-5, TMEM30A, FN1, BMP4…	1.9	5.4e-09
GO:0040008	regulation of growth	133	5.7	MEF2C, SYT1, NOG, PLXNA2, LTBP4, CRABP2, EDN1, L1CAM, OSGIN1, TGFB1, TGFB2, NOV, NRCAM, BDNF, SERPINE2, HTRA1, CTGF, CDKN2D, SEMA7A, ILK, PIK3CA, HTRA3, EGFR, BST2, SOCS3, FBP1, SOCS4, SIX4, BASP1, DCAF1, STK4, PLCE1, MELTF, SIX1, WNT5A, DCBLD2, FGFR1, KIAA1109, PLXNC1, PPP2R3A, TNFRSF12A, ESM1, RIMS2, SEMA5A, PTK2, NIPBL, MACF1, PTK6, CDA, AGRN, PLXND1, NKX2-5, FN1, BMP4, CPNE5, TGFBR1, TGFBR2, …	1.6	7.1e-09
GO:0002684	positive regulation of immune system process	181	7.7	PVR, MEF2C, MICB, ZC3HAV1, IL6ST, IL18, BTRC, TLR2, PTPN22, TLR4, IL15, TLR6, TGFB1, TGFB2, CFP, MAP3K7, NLRC5, SHB, ISG15, GAB2, GATA3, SEMA7A, SERPINE1, PDE4B, CFH, RABGEF1, IL15RA, PIK3CA, OGT, PDGFD, ADAM8, EBI3, COCH, IRS2, GBP5, BST1, EFNB2, RELB, HLA-A, PDE4D, HLA-B, CD40, HLA-E, TANK, PDCD1LG2, VEGFC, UNC13D, RGCC, PRDM1, TNFAIP3, GBP1, WNT5A, IFIH1, CAV1, ADORA2B, NFKBIA, ITGB2, HSPA1A, …	1.5	7.9e-09
GO:0050920	regulation of chemotaxis	53	2.3	PLXNA2, LPAR1, TGFB1, NOV, S1PR1, CXCR4, TIAM1, ROBO1, SEMA7A, SERPINE1, SEMA3E, SEMA3C, PDGFD, SEMA3A, FGF1, ANO6, MPP1, EFNB2, SLIT2, PPM1F, VEGFC, SEMA4F, F3, IL12A, SEMA4C, ADAM17, SEMA4B, GSTP1, CAMK1D, CXCL1, WNT5A, FGFR1, PLXNC1, CSF1, CXCL3, C5, GPSM3, CXCL2, CXCL8, SEMA5A, RAC2, THBS1, PLXND1, SCG2, IL6, SWAP70, MET, SMAD3, ITGA2, NCKAP1L, GAS6, NOTCH1, SEMA6B	2.3	5.1e-09
GO:0001818	negative regulation of cytokine production	60	2.6	PTPN22, TLR4, TGFB1, TGFB2, CD96, NLRC5, MC1R, ISG15, GATA3, RABGEF1, ERRFI1, CEACAM1, ZFP36, PTGER4, BST2, RELB, PRG2, HERC5, LEF1, NLRP3, PDCD1LG2, CD83, INHBA, RGCC, IL12A, ASB1, PRNP, TNFAIP3, SSC5D, GSTP1, GBP1, FGFR1, IFIH1, NMI, UBA7, PML, HFE, TRIB2, IRAK3, EZR, BCL3, THBS1, DHX58, SRGN, FN1, IL6, IL1RL1, ERBIN, AXL, ANXA1, UBE2L6, NCKAP1L, PIBF1, FURIN, GAS6, EPHA2, DDX58, CD274, KLF2, K…	2.1	5.6e-09
GO:0060485	mesenchyme development	62	2.6	NRP2, S100A4, MEF2C, NOG, FOXA2, EDN1, TBX20, TGFB1, TGFB2, EDNRA, EDNRB, ACTG2, DAB2, OSR1, SEMA7A, SEMA3E, FOXF2, SEMA3C, YAP1, SEMA3A, NRG1, LOXL2, LEF1, SIX2, BASP1, SIX4, HMGA2, SEMA4F, SIX1, RGCC, SEMA4C, SEMA4B, HAS2, FOXC1, TGFB1I1, ACVR1, WNT5A, FGFR1, GCNT2, SOX9, TCF7L2, ZFP36L1, SEMA5A, NKX2-1, BCL9L, NKX2-5, BMP4, BMP2, ACTC1, TGFBR1, TGFBR2, SMAD3, TEAD2, STAT1, SNAI2, WWTR1, CORO1C…	2.1	6e-09
GO:0071560	cellular response to transforming growth factor beta stimulus	58	2.5	MEF2C, LTBP1, LTBP2, LTBP4, ZNF451, FERMT2, EDN1, ANKRD1, ZEB1, TGFB1, TGFB2, MAP3K7, DAB2, HTRA1, CHST11, HTRA3, ZYX, PDGFD, PTPRK, ARHGEF18, ADAM17, TGFB1I1, ACVR1, WNT5A, CAV2, CAV1, PARD3, GCNT2, FUT8, PML, HSPA1A, SOX9, ITGB1, ZFP36L1, ZFP36L2, PEG10, PTK2, NKX2-1, BCL9L, SKIL, THBS1, COL4A2, KLF10, TGFBR1, FBN1, TGFBR2, CBL, SMAD3, ITGA3, FURIN, DKK3, PDE2A, FYN, ID1, SMURF2, SMURF1, APAF1,…	2.2	6.3e-09
GO:0046649	lymphocyte activation	131	5.6	MEF2C, MICB, IL6ST, IL18, PTPN22, TLR4, IL15, RORA, TGFB1, IL11, MAP3K7, SHB, GATA3, IL15RA, PIK3CA, ADAM8, EBI3, PIK3CG, SATB1, IRS2, BST2, BST1, EFNB2, RELB, HLA-A, LIG4, CD40, HLA-E, MYH9, DCAF1, PDCD1LG2, AHR, DCLRE1C, HHEX, UNC13D, CAMK4, PDE5A, PRDM1, TNFAIP3, CAV1, HFE, ITGB2, ITGB1, DOCK2, RAC2, TRAF6, RUNX2, HELLS, BMP4, KLF6, PELI1, LGALS3, LGALS1, TGFBR2, NCKAP1L, SMAD3, ATAD5, PIBF1, …	1.6	1e-08
GO:0006955	immune response	268	11.4	PVR, MEF2C, IL6ST, EDN1, PTPN22, RORA, ISG20, CFP, MAP3K7, SHB, CD44, ISG15, GAB2, SEMA7A, CCR10, CFH, PIK3CA, ERAP2, ADAM8, PIK3CG, GBP5, NCF2, CD40, GEM, LIG4, PDCD1LG2, TANK, DCLRE1C, UNC13D, CAMK4, KRT16, RGCC, MST1R, PRDM1, PNMA1, TNFRSF6B, GSDMD, OAS3, NFKBIA, IFI30, HFE, HSPA1A, OAS1, OAS2, LIF, RAC2, DHX58, PELI1, SPNS2, LGALS3, IL1RL1, CFB, LGALS1, SMAD3, NCKAP1L, SLAMF7, TINAGL1, ECM1, …	1.4	1.3e-08
GO:0007492	endoderm development	30	1.3	NOG, MMP9, TBX20, ITGB2, TGFB1, ZFP36L1, LAMB3, COL7A1, ITGAV, NKX2-1, COL12A1, COL8A1, LAMB1, FN1, COL4A2, MED12, SMAD3, MMP14, HMGA2, COL5A1, DUSP5, DUSP4, INHBA, HHEX, NOTCH1, DKK1, DUSP1, ITGA5, EXT1, DUSP6	3.1	4.4e-09
GO:0046822	regulation of nucleocytoplasmic transport	58	2.5	XPO1, PTGS2, XPO5, IL18, XPO4, TLR2, PTPN22, TLR4, RANGAP1, GLI3, GTSE1, TGFB1, NOV, TMEM173, DAB2, MDFIC, RAB23, TPR, MX2, EGFR, HSP90AA1, SP100, NLRP3, ECT2, PKIA, FLNA, GNAQ, CSF3, APC2, NFKBIE, PPP3R1, NFKBIA, SFN, TCF7L2, SEMA5A, PPP1R12A, BCL3, BMP4, IL6, NUP153, TGFBR1, HCLS1, SPHK1, PTPN14, SMAD3, SNAI2, WWTR1, GAS6, FZD7, PTPN11, DDX58, IFI27, RGS20, PDE2A, NEDD4, MAPK14, SETD2, TRIP6	2.2	7.5e-09
GO:0001704	formation of primary germ layer	39	1.7	WNT5A, FGFR1, NOG, MMP9, TBX20, ITGB4, ITGB2, ITGB3, ITGB1, LAMB3, COL7A1, ITGAV, COL12A1, LAMB1, COL8A1, FN1, BMP4, COL4A2, SIX2, ITGA2, LEF1, SMAD3, ITGA3, MMP14, HMGA2, FZD7, EPHA2, COL5A1, DUSP5, DUSP4, INHBA, DKK1, DUSP1, ITGA5, ETS2, FOXC1, KLF4, ACVR1, DUSP6	2.6	6e-09
GO:0048762	mesenchymal cell differentiation	51	2.2	S100A4, NRP2, MEF2C, NOG, FOXA2, EDN1, TGFB1, TGFB2, EDNRA, EDNRB, DAB2, OSR1, SEMA7A, FOXF2, SEMA3E, SEMA3C, SEMA3A, NRG1, LOXL2, LEF1, SIX2, HMGA2, SEMA4F, RGCC, SEMA4C, SEMA4B, HAS2, FOXC1, TGFB1I1, ACVR1, WNT5A, FGFR1, GCNT2, SOX9, TCF7L2, SEMA5A, NKX2-1, BCL9L, BMP4, BMP2, TGFBR1, TGFBR2, SMAD3, SNAI2, WWTR1, STAT1, CORO1C, NOTCH1, SEMA6B, LAMA5, ENG	2.3	8e-09
GO:0007159	leukocyte cell-cell adhesion	106	4.5	MICB, IL6ST, IL18, PTPN22, IL15, RORA, TGFB1, MAP3K7, SHB, CD44, GATA3, PIK3CA, ADAM8, EBI3, PIK3CG, SATB1, ROCK1, RELB, EFNB2, HLA-A, LIG4, MYH9, CERCAM, HLA-E, PDCD1LG2, CAMK4, PDE5A, HAS2, PRDM1, CAV1, STK10, HFE, ITGB2, ITGB1, DOCK2, RAC2, TRAF6, RUNX2, BMP4, PELI1, LGALS3, LGALS1, TGFBR2, NCKAP1L, SMAD3, PTPN11, ATP7A, CORO1A, CD55, NEDD4, ITGA5, ETS1, CD59, CD274, KLF4, PPARA, ELF4, FERMT3,…	1.7	1.2e-08
GO:0001655	urogenital system development	77	3.3	MEF2C, NOG, PDGFA, FSTL3, SDC4, GLI3, IQGAP1, TGFB1, TGFB2, SPRY1, OSR1, GATA3, WNK4, PAX8, ILK, CEP290, YAP1, PDGFD, FGF1, EGR1, RARG, EFNB2, SIX2, BASP1, SIX4, SLIT2, FMN1, PLCE1, TNS2, ACVR2B, SERPINF1, TACSTD2, SIX1, HAS2, FOXC1, CA2, LRRK2, FRAS1, WNT5A, FGFR1, ADAMTS16, TNC, GLIS2, TIPARP, ITGB4, C5ORF42, SOX9, EPHB2, LIF, NIPBL, FAT4, PCSK9, PCSK5, HELLS, BMP4, PLAG1, BMP2, COL4A1, MYO1E, …	1.9	1e-08
GO:0071559	response to transforming growth factor beta	58	2.5	MEF2C, LTBP1, LTBP2, LTBP4, ZNF451, FERMT2, EDN1, ANKRD1, ZEB1, TGFB1, TGFB2, MAP3K7, DAB2, HTRA1, CHST11, HTRA3, ZYX, PDGFD, PTPRK, ARHGEF18, ADAM17, TGFB1I1, ACVR1, WNT5A, CAV2, CAV1, PARD3, GCNT2, FUT8, PML, HSPA1A, SOX9, ITGB1, ZFP36L1, ZFP36L2, PEG10, PTK2, NKX2-1, BCL9L, SKIL, THBS1, COL4A2, KLF10, TGFBR1, FBN1, TGFBR2, CBL, SMAD3, ITGA3, FURIN, DKK3, PDE2A, FYN, ID1, SMURF2, SMURF1, APAF1,…	2.1	9.1e-09
GO:0007049	cell cycle	285	12.2	KIFC1, PTGS2, EDN1, RANGAP1, AURKA, AURKB, HMGN5, MEI1, SHB, BRINP2, HMCN1, CTGF, RAE1, INCENP, ILK, CEP290, CCNA1, CRY1, STAG1, PTPRK, PLD6, ROCK2, LIG1, PIM1, ESPL1, UBR2, GPR132, OPTN, LIG4, GEM, MYH9, CEP152, DCTN1, UHRF1, UHRF2, SGO2, SGO1, MCIDAS, PRDM5, RGCC, KIF4A, CDK5R2, GNAI2, TICRR, GNAI1, AHCTF1, CEP164, AFAP1L2, CNTRL, LIF, HEXIM1, NUP50, OBSL1, PRPF40A, BMP4, BMP2, MKI67, TP53BP2, …	1.4	1.6e-08
GO:0045596	negative regulation of cell differentiation	130	5.6	NOG, IL18, FSTL3, TLR4, LPAR1, RORA, TGFB1, TGFB2, NOV, S1PR3, SHB, BDNF, GATA3, SEMA7A, IL15RA, ASPM, EGFR, RARG, ACTN4, PTPRG, SIX2, HMG20A, SIX4, ARNTL, ADAMTS7, PTHLH, MAP4K4, MIB1, MELTF, TACSTD2, NFE2L2, PMP22, GBP1, WNT5A, CAV1, ASAP1, NFKBIA, ABCA1, ITGB3, SOX9, ITGB1, EPHB2, ABCA5, SEMA5A, PTK2, MEIS2, UBASH3B, ITGAV, NKX2-1, SKIL, RUNX1, NKX2-5, BMP4, BMP2, TGFBR1, LGALS1, ASXL1, EFEMP1…	1.6	1.4e-08
GO:0051271	negative regulation of cellular component movement	66	2.8	DLC1, NOG, TGFB1, ACVR1C, VCL, NOV, ROBO1, GATA3, SEMA7A, SEMA3E, ILK, SERPINE1, RABGEF1, SEMA3C, TIE1, SEMA3A, NRG1, PLCB1, GPR173, PTPRK, RAP2A, SP100, PTGER4, BST2, ACTN4, PTPRG, ACTN1, SLIT2, SERPINF1, KRT16, TACSTD2, SEMA4F, CLIC4, RGCC, SEMA4C, SEMA4B, STC1, MCC, NFE2L2, SRGAP1, GSTP1, WNT5A, IFITM1, SPOCK3, C5, CCL28, ZMYND8, STARD13, TIMP1, SEMA5A, NKX2-1, PTN, CNN2, THBS1, ARHGDIB, DACH1…	2	1.1e-08
GO:0031346	positive regulation of cell projection organization	74	3.2	SYT1, TRPV2, CRABP2, L1CAM, ANKRD1, LPAR1, ITPKA, IQGAP1, SETX, BDNF, ROBO1, TIAM1, SEMA7A, ILK, IL1RAP, NRG1, NEGR1, GOLGA4, HSP90AA1, ENC1, NDNF, SLIT2, SERPINF1, NPTN, CLIP1, CNTN1, NFE2L2, CAMK1D, WNT5A, FGFR1, CEP120, TNFRSF12A, RIMS2, CDH4, ZMYND8, SCARF1, SEMA5A, CDC42EP2, CDC42EP1, RAC2, MACF1, PTK6, BCL11A, PTN, OBSL1, PAFAH1B1, AGRN, SKIL, IL1RAPL1, CDC42EP3, TMEM30A, APC, FN1, DNM3, IL…	1.9	1.2e-08
GO:0045785	positive regulation of cell adhesion	88	3.8	FOXA2, IL6ST, IL18, FSTL3, PTPN22, IL15, EDIL3, SDC4, GLI3, IQGAP1, TGFB1, TGFB2, MAP3K7, HSPH1, SHB, CD44, SAA1, GATA3, HLX, IL4R, ILK, PIK3CA, PAK1, ADAM8, NRG1, EBI3, CYR61, AP3B1, PRKCA, ROCK1, EFNB2, HLA-A, LEF1, CDK6, NLRP3, HLA-E, PRKCE, MYADM, PDCD1LG2, NDNF, FLNA, FMN1, PPM1F, VEGFC, CD83, CARD11, UNC13D, CRKL, IL12A, HAS2, WNT5A, CAV1, GCNT2, CSF1, HACD1, IL7R, CCL28, APBB1IP, ABI3BP, I…	1.8	1.3e-08
GO:0007178	transmembrane receptor protein serine/threonine kinase signaling pathway	77	3.3	NOG, LTBP1, LTBP2, LTBP4, FERMT2, ZNF451, FST, TBX20, FSTL3, TTK, FSTL1, ZEB1, TGFB1, ACVR1C, TGFB2, MAP3K7, NOV, DAB2, JADE2, HTRA1, ILK, CHST11, HTRA3, ZYX, CYR61, EGR1, PTPRK, ARHGEF18, LEF1, INHBA, ACVR2B, CHRDL1, ADAM17, TGFB1I1, ACVR1, WNT5A, CAV2, CAV1, PARD3, GCNT2, FUT8, VIM, PML, HFE, HSPA1A, ITGB1, PEG10, RGMB, PTK2, NKX2-1, BCL9L, SKIL, THBS1, RUNX2, NKX2-5, BMP4, BMP2, NCEH1, TGFBR1,…	1.9	1.4e-08
GO:0000165	MAPK cascade	161	6.9	MEF2C, MEF2A, STK38, PDGFA, IL18, BTRC, EDN1, CSPG4, IQGAP3, PTPN22, TLR4, LPAR1, TLR6, IL17RD, TGFB1, IQGAP1, IL11, IL31RA, TGFB2, SETX, MAP3K7, CD44, MDFIC, TIAM1, CTGF, SEMA7A, ILK, SPRED2, PDGFC, PELI2, RNF149, PDGFD, SPRED1, ADAM8, EGFR, PIK3CG, IRS2, ACTN2, CD40, MECOM, IRS1, MAP4K4, SPAG9, PLCE1, RASGRF1, PDE5A, NPTN, MST1R, LRRK2, GBP1, WNT5A, TNFRSF6B, FGFR1, CAV2, CAV1, GCNT2, GNAI2, AD…	1.5	1.9e-08
GO:0051129	negative regulation of cellular component organization	127	5.4	DLC1, LYPD1, NOG, ZNF451, TTK, LPAR1, TGFB1, TGFB2, DAB2, PICALM, S1PR1, VPS13C, SEMA7A, RABGEF1, IL15RA, PID1, ACTN4, ROCK1, PTPRG, ROCK2, ESPL1, TMSB10, MAP4K4, MELTF, TACSTD2, RGCC, LRRK2, PMP22, GBP1, WNT5A, CAV1, ASAP1, HSPA1A, EPHB2, SEMA5A, LIF, WAPL, IRAK3, PTK2, FBXO43, NKX2-1, BMP4, SMG6, LGALS3, LGALS1, ATAD2, ITGA3, SHANK1, ATM, CORO1C, EPHA4, SEMA6B, CORO1A, EPS8, TMOD3, DNMT1, SPTBN…	1.6	1.8e-08
GO:0022612	gland morphogenesis	38	1.6	WNT5A, FGFR1, CAV1, NOG, LIMS2, PDGFA, TNC, BTRC, CSF1, PML, SOX9, GLI3, TGFB1, TGFB2, STAT6, EZR, TGM2, PTN, SEMA3C, MSN, SEMA3A, PLXND1, ETV4, CEACAM1, PLAG1, BMP4, EGFR, IL6, RARG, CEBPB, TGFBR2, NTN4, EPHA2, CYP7B1, NOTCH1, LAMA5, AREG, TNFAIP3	2.6	9.4e-09
GO:0050678	regulation of epithelial cell proliferation	73	3.1	NRP2, MEF2C, NOG, IQGAP3, GJA1, TNFSF12, TGFB1, TGFB2, EDNRB, OSR1, HTRA1, ROBO1, GATA3, YAP1, FGF1, AGAP2, ERRFI1, CEACAM1, ZFP36, PRKCA, EGFR, PTPRK, EFNB2, NKX2-8, CDK6, RB1, SIX4, HMGA2, WDR48, VEGFC, EREG, SERPINF1, TACSTD2, F3, SIX1, RGCC, HAS2, MCC, TNFAIP3, WNT5A, CAV2, CAV1, LIMS2, ITGB3, SFN, SOX9, CCL26, CCL24, ZFP36L1, SEMA5A, NR1D1, PTN, LAMB1, THBS1, ETV4, SCG2, BMP4, BMP2, IL6, TGF…	1.9	1.5e-08
GO:0043069	negative regulation of programmed cell death	159	6.8	CAST, MEF2C, NOG, IL6ST, MMP9, EDN1, AURKA, AURKB, HMGN5, AQP1, KANK2, IL11, IL31RA, SETX, DAB2, BDNF, CD44, GATA3, CDKN2D, ILK, SERPINE1, PIK3CA, CREB3L1, ADAM8, EGFR, PIK3CG, IRS2, RARG, ROCK1, SOCS3, BCL2A1, PIM1, SIX4, LIG4, MECOM, PLAUR, MAP4K4, SIX1, NFE2L2, LRRK2, TNFAIP3, NRBP2, WNT5A, TNFRSF6B, CAV1, MCL1, NFKBIA, HSPA1A, SOX9, ITGB1, TIMP1, SEMA5A, PTK2, MEIS3, ITGAV, TRAF6, NKX2-5, HEL…	1.5	2.1e-08
GO:0036293	response to decreased oxygen levels	72	3.1	BACH1, PPARA, CPEB2, PTGS2, HP1BP3, EDN1, TLR2, PDLIM1, ANKRD1, RORA, PMAIP1, AQP1, TGFB1, TGFB2, EDNRA, CXCR4, PLOD2, CTGF, PAK1, ADAM8, LOXL2, EGR1, ICAM1, ACTN4, FUNDC1, PRKCE, MMP14, NDNF, DDIT4, VEGFC, ADM, CA9, RGCC, ADAM17, STC1, NFE2L2, PAM, CAV1, PML, WTIP, ZFP36L1, SLC29A1, ERO1A, PTN, NDRG1, THBS1, ERCC2, ANGPTL4, MUC1, PLAT, BMP2, EPAS1, CBL, TGFBR2, NR4A2, LMNA, SMAD3, ITGA2, CAPN2, …	1.9	1.6e-08
GO:0032103	positive regulation of response to external stimulus	67	2.9	PTGS2, LDLR, ZC3HAV1, OSMR, IL6ST, IL18, TLR2, TLR4, IL15, LPAR1, TGFB1, IL17RA, S1PR1, NOD1, TIAM1, DDX60, SERPINE1, PDGFD, ADAM8, TNIP1, ANO6, EGFR, PRKCA, PIK3CG, GBP5, PTGER4, LY96, SLIT2, PPM1F, VEGFC, THBD, F3, IL12A, ADAM17, CAMK1D, WNT5A, CXCL1, FGFR1, ADORA2B, C3, CXCL3, CSF1, GPSM3, CXCL2, CXCL8, SCARF1, CCL26, CCL24, SEMA5A, RAC2, TGM2, TRAF6, THBS1, DHX58, SCG2, IL6, IL1RL1, SWAP70, M…	2	1.6e-08
GO:0060326	cell chemotaxis	64	2.7	EDN1, LPAR1, IL17RA, TGFB2, NOV, EDNRB, S1PR1, CXCR4, SAA1, TIAM1, CH25H, PDE4B, SERPINE1, PDGFD, ADAM8, FGF1, ANO6, RHOG, PIK3CG, MPP1, LEF1, PDE4D, SLIT2, VEGFC, IL12A, ADAM17, GSTP1, CAMK1D, PARVA, WNT5A, CXCL1, FGFR1, CXCL3, CSF1, C5, GPSM3, CXCL2, CXCL8, ITGB2, CCL28, CCL26, CCL24, SEMA5A, HRH1, RAC2, PLEKHG5, THBS1, SCG2, IL6, LGALS3, SWAP70, MET, ITGA1, ANXA1, NCKAP1L, GAS6, EPHA2, DOCK4, …	2	1.7e-08
GO:0032270	positive regulation of cellular protein metabolic process	247	10.5	DLC1, MEF2C, RAB3GAP2, ADCY7, IL6ST, EDN1, PTPN22, RNF217, AURKA, LPAR1, MAP3K7, PICALM, CD44, CTGF, SEMA7A, CCBE1, ILK, PIK3CA, PELI2, OGT, ADAM8, PIK3CG, ROCK2, TRABD2A, PIM1, CD40, MYH9, TANK, PLAUR, VEGFC, SPAG9, UHRF1, MELTF, F3, RGCC, NPTN, MST1R, TNFRSF6B, CDK5R2, GCNT2, GNAI2, NFKBIA, HFE, AKAP13, AFAP1L2, HSPA1A, LIF, DYNAP, BMP4, BMP2, PELI1, TGFBR1, SPHK1, TGFBR2, SMAD3, NCKAP1L, PIBF1…	1.4	2.9e-08
GO:0046578	regulation of Ras protein signal transduction	55	2.3	DLC1, LPAR1, TGFB2, SPRY2, SPRY1, TIAM2, TIAM1, ROBO1, RABGEF1, ARHGEF40, OGT, NRG1, ALS2CL, KIF14, ARHGEF3, ARHGEF2, ARHGEF1, STMN3, ARHGEF18, FBP1, ECT2, ARHGEF10, FARP1, PLCE1, RASGRF1, GPR17, RALGPS2, CSF1, ARHGEF28, CYTH4, AKAP13, MYO9B, ABCA1, TIMP2, ARFGEF2, ITGB1, PLEKHG4, RASAL2, PLEKHG2, PLEKHG1, SOS1, PLEKHG5, SOS2, ARHGAP42, RASA3, FGD6, RASA1, RASA2, ARHGDIB, STAMBP, TRIO, ITGA3, DNM…	2.2	1.9e-08
GO:0070482	response to oxygen levels	75	3.2	BACH1, PPARA, CPEB2, PTGS2, HP1BP3, EDN1, PPARG, TLR2, PDLIM1, ANKRD1, RORA, LPAR1, PMAIP1, AQP1, TGFB1, TGFB2, EDNRA, CXCR4, PLOD2, CTGF, PAK1, ADAM8, LOXL2, EGR1, ICAM1, ACTN4, FUNDC1, MMP14, PRKCE, NDNF, DDIT4, VEGFC, ADM, CA9, RGCC, ADAM17, STC1, NFE2L2, PAM, CAV1, PML, WTIP, POLR2A, ZFP36L1, SLC29A1, ERO1A, PTN, NDRG1, THBS1, ERCC2, ANGPTL4, MUC1, PLAT, BMP2, EPAS1, CBL, TGFBR2, NR4A2, LMNA,…	1.9	2.2e-08
GO:0001666	response to hypoxia	70	3	BACH1, PPARA, CPEB2, PTGS2, HP1BP3, EDN1, TLR2, PDLIM1, ANKRD1, RORA, PMAIP1, AQP1, TGFB1, TGFB2, EDNRA, CXCR4, PLOD2, PAK1, ADAM8, LOXL2, EGR1, ICAM1, ACTN4, FUNDC1, PRKCE, MMP14, NDNF, DDIT4, VEGFC, ADM, CA9, RGCC, ADAM17, STC1, NFE2L2, PAM, CAV1, PML, WTIP, SLC29A1, ZFP36L1, ERO1A, PTN, NDRG1, THBS1, ERCC2, ANGPTL4, MUC1, PLAT, BMP2, EPAS1, TGFBR2, NR4A2, LMNA, SMAD3, ITGA2, CAPN2, ITPR1, ATM,…	1.9	2.3e-08
GO:0045893	positive regulation of transcription, DNA-templated	236	10.1	MEF2C, NOG, MEF2A, EDN1, FSTL3, RORA, HMGN5, PICALM, S1PR1, MC1R, SERPINE1, FOXF2, ILK, CEP290, CREB3L1, OGT, STAG1, RARG, NKX2-8, MED12, CD40, MECOM, UHRF1, CAMK4, MCIDAS, RGCC, TGFB1I1, ZNF516, NFKBIA, AFAP1L2, MYBL1, LIF, NKX2-1, ARNTL2, AGRN, NKX2-5, PLAG1, BMP4, KLF5, ASXL2, KLF6, KLF7, BMP2, KLF12, TGFBR1, MAML2, ASXL1, SMAD3, NKX6-1, SHOX2, NOTCH1, ICE1, ETS1, ETS2, SUPT16H, KLF2, KAT6B, E…	1.4	3.7e-08
GO:1903508	positive regulation of nucleic acid-templated transcription	236	10.1	MEF2C, NOG, MEF2A, EDN1, FSTL3, RORA, HMGN5, PICALM, S1PR1, MC1R, SERPINE1, FOXF2, ILK, CEP290, CREB3L1, OGT, STAG1, RARG, NKX2-8, MED12, CD40, MECOM, UHRF1, CAMK4, MCIDAS, RGCC, TGFB1I1, ZNF516, NFKBIA, AFAP1L2, MYBL1, LIF, NKX2-1, ARNTL2, AGRN, NKX2-5, PLAG1, BMP4, KLF5, ASXL2, KLF6, KLF7, BMP2, KLF12, TGFBR1, MAML2, ASXL1, SMAD3, NKX6-1, SHOX2, NOTCH1, ICE1, ETS1, ETS2, SUPT16H, KLF2, KAT6B, E…	1.4	3.7e-08
GO:0022607	cellular component assembly	416	17.8	MEF2C, DLC1, KIFC1, MEF2A, CTGF, ILK, PLS3, PTPRK, GBP5, ROCK1, ROCK2, MYH3, SPAG9, FCHSD2, FCHSD1, PMP22, KIF4A, AHCTF1, HFE, HSPA1A, CDC42EP2, CDC42EP1, RAC2, OBSL1, CDC42EP3, TGFBR1, PIBF1, ATM, GAS6, WDR62, FAM161A, AREG, TAF1B, LIMA1, SYNJ1, NAP1L3, NOCT, OFD1, NOD1, SRPX, IL1RAP, SERPINA1, WDR35, ATF7IP, RAP2A, SH3PXD2A, STX2, ANP32E, TPX2, FBLIM1, KIAA0586, BBS12, MMP14, FLNC, RFTN1, MYADM…	1.3	4.2e-08
GO:0001558	regulation of cell growth	90	3.8	SYT1, FOXK1, PLXNA2, IGFBP7, TRPV2, LTBP4, IGFBP6, PPARG, EDN1, CRABP2, GJA1, OSGIN1, L1CAM, TGFB1, TGFB2, NOV, NRCAM, BDNF, WDR36, SERPINE2, HTRA1, CTGF, SEMA7A, CDKN2D, SEMA3E, ILK, SEMA3C, HTRA3, SEMA3A, NRG1, GOLGA4, SERTAD1, CEACAM1, SERTAD2, CYR61, KIF14, EGFR, SGK1, BST2, NOL8, FBP1, LEF1, RB1, MMP14, SLIT2, INHBA, PLCE1, MELTF, SEMA4F, SEMA4C, SEMA4B, ADAM17, WNT5A, DCBLD2, PLXNC1, KIAA11…	1.8	2.9e-08
GO:0048858	cell projection morphogenesis	153	6.5	SYT1, MEF2A, S100A6, NOG, PLXNA2, CRABP2, L1CAM, AURKA, ITPKA, IQGAP1, TGFB2, VCL, NRCAM, BDNF, PICALM, TIAM1, ROBO1, GATA3, SEMA7A, ILK, RAB23, CEP290, EGFR, RBFOX2, KIF5B, EFNB2, NKX2-8, FARP1, CEP162, MCIDAS, ANOS1, OPHN1, SLITRK6, EXT1, LRRK2, SLITRK5, WNT5A, PLXNC1, C11ORF63, TNFRSF12A, TMEM216, ASAP1, CEP164, RIMS2, ITGB1, EPHB2, SEMA5A, PTK2, MACF1, OBSL1, NKX2-1, SKIL, B3GNT2, PLXND1, IL1…	1.5	3.7e-08
GO:0042692	muscle cell differentiation	83	3.5	MEF2C, MEF2A, IL18, EDN1, ANKRD1, ZEB1, RORA, TGFB1, FLT3LG, DMPK, NOV, EDNRB, BDNF, ANK2, IL4R, ILK, QKI, SOX15, SIK1, PLCB1, NRG1, BHLHE41, MKL1, CHUK, MYH3, EFNB2, LEF1, ACTN2, RB1, SIX4, MBNL1, NEXN, MMP14, MYH9, FLNC, SPAG9, EREG, ADM, CFL2, SIX1, SEMA4C, FHOD3, SORT1, ADAM12, ACVR1, CAV2, FHL2, AKAP13, SOX9, ITGB1, TCF7L2, NR2C2, ZFP36L1, SPEG, DNER, CYP26B1, OBSL1, EHD1, NFATC2, EHD2, NKX2…	1.8	2.9e-08
GO:0051093	negative regulation of developmental process	144	6.1	NOG, IL18, FSTL3, TLR4, LPAR1, TGFB1, TGFB2, NOV, S1PR3, SHB, BDNF, ROBO1, GATA3, SEMA7A, SERPINE1, IL15RA, ASPM, EGFR, RARG, ACTN4, ROCK1, PTPRG, ROCK2, HMG20A, SIX4, STK4, ADAMTS7, PTHLH, MAP4K4, HHEX, MIB1, MELTF, SERPINF1, TACSTD2, SIX1, RGCC, NFE2L2, PMP22, GBP1, WNT5A, CAV1, NFKBIA, ASAP1, SOX9, TIMP1, EPHB2, SEMA5A, PTK2, MEIS2, UBASH3B, NKX2-1, RUNX1, NKX2-5, SRGN, ARHGDIB, BMP4, BMP2, TG…	1.5	3.6e-08
GO:0006464	cellular protein modification process	579	24.7	MEF2C, PDP1, DLC1, XRCC4, MEF2A, RANGAP1, CLK1, MED20, MAP3K7, EPC2, USP53, ISG15, BRPF3, RAE1, CTGF, INCENP, ILK, PIK3CA, OGT, ADAM8, STAG1, PIK3CG, PTPRK, ROCK1, PTPRG, ROCK2, PTPRH, RCOR1, LIG1, MYH3, CRTAP, MED12, NAA25, HMG20A, MECOM, DCAF1, PLAUR, ADAMTS7, SPAG9, NPC1, MST1R, TNFRSF6B, TRIML2, MGAT5B, PPP2R3A, DBNDD2, GNAI2, UBA7, HFE, HSPA1A, CNTRL, DUSP11, P3H2, DUSP18, KBTBD2, PPP1R3C, P…	1.2	5.3e-08
GO:0036211	protein modification process	579	24.7	MEF2C, PDP1, DLC1, XRCC4, MEF2A, RANGAP1, CLK1, MED20, MAP3K7, EPC2, USP53, ISG15, BRPF3, RAE1, CTGF, INCENP, ILK, PIK3CA, OGT, ADAM8, STAG1, PIK3CG, PTPRK, ROCK1, PTPRG, ROCK2, PTPRH, RCOR1, LIG1, MYH3, CRTAP, MED12, NAA25, HMG20A, MECOM, DCAF1, PLAUR, ADAMTS7, SPAG9, NPC1, MST1R, TNFRSF6B, TRIML2, MGAT5B, PPP2R3A, DBNDD2, GNAI2, UBA7, HFE, HSPA1A, CNTRL, DUSP11, P3H2, DUSP18, KBTBD2, PPP1R3C, P…	1.2	5.3e-08
GO:1903708	positive regulation of hemopoiesis	47	2	CSF3, IL18, CSF1, IL15, IL7R, GLI3, TGFB1, FLT3LG, LIF, ZFP36L1, SHB, SMAP1, ISG15, GATA3, IL4R, HLX, CASP8, IL15RA, OGT, RUNX1, TRAF6, ADAM8, AP3B1, PRKCA, IL6, LGALS3, KLF10, HCLS1, LGALS1, TGFBR2, ANXA1, AXL, LEF1, NCKAP1L, RB1, NLRP3, MMP14, GAS6, CD83, INHBA, ETS1, MAPK14, RIPK1, IL12A, FOXC1, CA2, PRDM1	2.3	2.5e-08
GO:1903047	mitotic cell cycle process	167	7.1	KIFC1, PRC1, BTRC, EDN1, IQGAP3, TTK, AURKA, AURKB, TGFB1, KANK2, RAD21, RAE1, INCENP, CDKN2D, CEP290, CCNA1, ASPM, STAG1, EGFR, PID1, CEP85, LIG1, PIM1, ESPL1, GPR132, GEM, OPTN, CEP152, PKIA, DCTN1, NABP1, SGO1, RGCC, CLIP1, PDCD6IP, SNX9, PAM, FGFR1, KIF4A, BLM, TICRR, SLF2, CEP164, ANLN, CNTRL, ITGB1, WAPL, NIPBL, NUP50, FBXO43, HELLS, ERCC6L, MUC1, BMP4, TAF2, CKAP5, ALMS1, SPDL1, PIBF1, MIS…	1.5	4.5e-08
GO:0001501	skeletal system development	104	4.4	MEF2C, NOG, MMP9, EDN1, FAM20C, HOXD1, TGFB1, MTHFD1L, TGFB2, NOV, CD44, CTGF, TGFBI, RAB23, COL12A1, PDGFC, PLS3, MATN3, SATB2, RARG, MED12, SIX2, HES7, SIX4, ADAMTS7, PTHLH, HOXD3, SIX1, HOXD4, LNPK, STC1, HAS2, EXT1, WNT5A, FGFR1, WNT5B, AKAP13, SOX9, SERPINH1, TIMP1, NIPBL, ITGB8, RUNX1, RUNX2, BMP4, SPNS2, BMP2, TGFBR1, KLF10, TGFBR2, EFEMP1, ASXL1, SMAD3, EPHA2, PTPN11, SHOX2, HOXB3, ATP7A,…	1.7	4e-08
GO:0072001	renal system development	69	2.9	MEF2C, NOG, PDGFA, FSTL3, SDC4, GLI3, IQGAP1, TGFB1, TGFB2, SPRY1, OSR1, GATA3, WNK4, PAX8, ILK, CEP290, YAP1, PDGFD, FGF1, EGR1, EFNB2, SIX2, BASP1, SIX4, SLIT2, FMN1, PLCE1, TNS2, ACVR2B, SERPINF1, TACSTD2, SIX1, HAS2, FOXC1, CA2, LRRK2, WNT5A, FRAS1, FGFR1, ADAMTS16, GLIS2, TIPARP, ITGB4, C5ORF42, SOX9, LIF, NIPBL, FAT4, PCSK9, PCSK5, BMP4, BMP2, COL4A1, MYO1E, TGFBR1, PODXL, FBN1, CENPF, SMAD…	1.9	3.4e-08
GO:0070201	regulation of establishment of protein localization	156	6.7	XPO1, PTGS2, XPO5, IL18, XPO4, TLR2, PTPN22, RANGAP1, TLR4, ANKRD1, PMAIP1, TLR6, TGFB1, IL17RA, TGFB2, NOV, DAB2, MDFIC, TIAM1, GATA3, SLC2A1, RABGEF1, RAB23, CEP290, RAPGEF4, ASPH, ADAM8, EGFR, PID1, IRS2, KIF5B, C2CD5, UGCG, CD40, ARNTL, HLA-E, PKIA, IRS1, MAP4K4, VEGFC, RGCC, PAEP, LRRK2, SSC5D, GBP1, WNT5A, PAM, NFKBIE, GSDMD, NFKBIA, ITGB1, SEMA5A, RAC2, HNMT, TRAF6, SH3TC2, TMEM30A, SRGN, …	1.5	5e-08
GO:1902680	positive regulation of RNA biosynthetic process	238	10.2	MEF2C, NOG, MEF2A, EDN1, FSTL3, RORA, HMGN5, PICALM, S1PR1, MC1R, SERPINE1, FOXF2, ILK, CEP290, CREB3L1, OGT, STAG1, RARG, NKX2-8, MED12, CD40, MECOM, UHRF1, CAMK4, MCIDAS, RGCC, TGFB1I1, ZNF516, NFKBIA, AFAP1L2, MYBL1, LIF, NKX2-1, ARNTL2, AGRN, NKX2-5, PLAG1, BMP4, KLF5, ASXL2, KLF6, KLF7, BMP2, KLF12, TGFBR1, MAML2, ASXL1, SMAD3, NKX6-1, SHOX2, NOTCH1, ICE1, ETS1, ETS2, SUPT16H, KLF2, KAT6B, E…	1.4	5.6e-08
GO:0010634	positive regulation of epithelial cell migration	35	1.5	WNT5A, NRP2, FGFR1, PTGS2, MMP9, EDN1, ITGB3, AMOTL1, SOX9, TGFB1, TGFB2, SEMA5A, GATA3, CCBE1, FGF1, THBS1, PRKCA, BMP4, ROCK2, TGFBR2, MET, ITGA2, ITGA3, PRKCE, DOCK5, ANXA3, PPM1F, VEGFC, SRPX2, ETS1, MAPK14, HBEGF, HAS2, NFE2L2, HDAC9	2.6	2.8e-08
GO:0051254	positive regulation of RNA metabolic process	244	10.4	MEF2C, NOG, MEF2A, EDN1, FSTL3, RORA, HMGN5, PICALM, S1PR1, MC1R, SERPINE1, FOXF2, ILK, CEP290, CREB3L1, OGT, STAG1, RARG, NKX2-8, MED12, CD40, MECOM, UHRF1, CAMK4, MCIDAS, RGCC, TGFB1I1, ZNF516, NFKBIA, AFAP1L2, HSPA1A, MYBL1, LIF, NKX2-1, ARNTL2, AGRN, NKX2-5, PLAG1, BMP4, KLF5, ASXL2, KLF6, KLF7, BMP2, KLF12, TGFBR1, MAML2, ASXL1, SMAD3, NKX6-1, SHOX2, NOTCH1, ICE1, ETS1, ETS2, SUPT16H, KLF2, …	1.4	7.3e-08
GO:0008360	regulation of cell shape	43	1.8	GNA13, RHOJ, DLC1, FERMT2, ARHGAP18, ITGB2, LPAR1, CCL24, PHIP, PTK2, CDC42EP2, EZR, CDC42EP1, STRIP2, SEMA3E, PTN, MSN, WIPF1, CDC42EP3, FGD6, RASA1, PRPF40A, FN1, COCH, FMNL1, ICAM1, IL6, FMNL3, ARHGEF18, ANXA1, CSNK1A1L, FBLIM1, MYH9, SYNE3, BRWD3, MYO10, CORO1A, EPS8, CSNK1E, FYN, SH3KBP1, ARAP3, PARVA	2.4	3.9e-08
GO:0048638	regulation of developmental growth	72	3.1	MEF2C, SYT1, NOG, PLXNA2, TRPV2, CRABP2, EDN1, TBX20, WWC2, GJA1, L1CAM, LATS2, NRCAM, BDNF, WDR36, SEMA7A, HLX, SEMA3E, ILK, SOX15, PIK3CA, SEMA3C, YAP1, SEMA3A, PLCB1, NRG1, GOLGA4, BASP1, SIX4, HMGA2, STK4, SEMA4F, SIX1, SEMA4C, SEMA4B, FOXC1, CARM1, WNT5A, FGFR1, PLXNC1, PPP2R3A, TNFRSF12A, CSF1, RIMS2, CDH4, SEMA5A, PTK2, NIPBL, EZR, MACF1, BCL11A, PAFAH1B1, AGRN, PLXND1, NKX2-5, FN1, BMP4, …	1.9	5.3e-08
GO:0043066	negative regulation of apoptotic process	155	6.6	CAST, MEF2C, NOG, IL6ST, MMP9, EDN1, AURKA, AURKB, HMGN5, AQP1, IL11, IL31RA, SETX, DAB2, BDNF, CD44, GATA3, CDKN2D, ILK, SERPINE1, PIK3CA, CREB3L1, ADAM8, EGFR, PIK3CG, IRS2, RARG, ROCK1, SOCS3, BCL2A1, PIM1, SIX4, LIG4, PLAUR, MAP4K4, SIX1, NFE2L2, LRRK2, TNFAIP3, NRBP2, WNT5A, TNFRSF6B, CAV1, MCL1, NFKBIA, HSPA1A, SOX9, ITGB1, TIMP1, SEMA5A, PTK2, MEIS3, ITGAV, TRAF6, NKX2-5, HELLS, ANGPTL4, M…	1.5	7.2e-08
GO:0007162	negative regulation of cell adhesion	57	2.4	DLC1, PPARA, PTPN22, PAWR, SDC4, GLI3, TGFB1, SERPINE2, IL4R, HLX, SEMA3E, SERPINE1, TGFBI, CEACAM1, ACTN4, LEF1, MMP14, MYADM, PDCD1LG2, MELTF, TACSTD2, PDE5A, RGCC, PRNP, GBP1, GCNT2, TNC, HFE, FXYD5, CCL28, SEMA5A, PTK2, LPXN, UBASH3B, THBS1, RASA1, ARHGDIB, BMP4, MUC1, BMP2, PELI1, CEBPB, LGALS3, SWAP70, LGALS1, PODXL, ANXA1, SNAI2, FZD4, FZD7, PTPN11, CORO1C, NOTCH1, CD274, IRF1, PHLDB2, KLF4	2.1	4.8e-08
GO:0060548	negative regulation of cell death	167	7.1	CAST, MEF2C, NOG, IL6ST, MMP9, EDN1, AURKA, AURKB, HMGN5, AQP1, KANK2, IL11, IL31RA, SETX, NOV, DAB2, BDNF, CD44, CTGF, GATA3, CDKN2D, ILK, SERPINE1, PIK3CA, CREB3L1, ADAM8, EGFR, PIK3CG, IRS2, RARG, ROCK1, SOCS3, BCL2A1, PIM1, SIX4, LIG4, MECOM, PLAUR, MAP4K4, NPC1, SERPINF1, SIX1, NFE2L2, LRRK2, TNFAIP3, NRBP2, WNT5A, TNFRSF6B, CAV1, MCL1, NFKBIA, HSPA1A, SOX9, ITGB1, TIMP1, SEMA5A, PTK2, MEIS3…	1.5	7.6e-08
GO:0001934	positive regulation of protein phosphorylation	166	7.1	MEF2C, ADCY7, PDGFA, IL6ST, MMP9, IL18, EDN1, CSPG4, TNFSF15, IQGAP3, PTPN22, TTK, TLR4, IL15, LPAR1, TLR6, TGFB1, IQGAP1, IL11, IL31RA, TGFB2, MAP3K7, DAB2, CD44, MDFIC, TIAM1, CTGF, SEMA7A, ILK, PIK3CA, PDGFC, PELI2, PDGFD, ADAM8, EGFR, PIK3CG, SOCS3, ROCK2, PIM1, CD40, STK4, PLAUR, VEGFC, SPAG9, PLCE1, RGCC, PDE5A, NPTN, MST1R, LRRK2, WNT5A, TNFRSF6B, SNX9, FGFR1, CAV2, CAV1, GCNT2, CDK5R2, GN…	1.5	7.5e-08
GO:0006366	transcription from RNA polymerase II promoter	302	12.9	MEF2C, MEF2A, NOG, FST, EDN1, FSTL3, FSTL1, AURKB, RORA, MED20, S1PR1, MC1R, CTGF, HTRA1, FOXF2, SERPINE1, ILK, CREB3L1, HTRA3, OGT, CRY1, STAG1, ZNF45, RARG, RCOR1, NKX2-8, MED12, HMG20A, CD40, DCAF1, UHRF1, MED15, MCIDAS, PRDM5, RGCC, PRDM1, TGFB1I1, ZNF516, NFKBIA, HFE, MYBL1, TAGLN3, LIF, HEXIM1, NKX2-1, AGRN, ARNTL2, VEZF1, NKX2-5, PLAG1, KLF5, BMP4, ASXL2, BMP2, NRBF2, KLF12, KLF10, MAML2, …	1.3	8.6e-08
GO:0040013	negative regulation of locomotion	64	2.7	DLC1, NOG, TGFB1, ACVR1C, VCL, NOV, ROBO1, GATA3, SEMA7A, SEMA3E, ILK, SERPINE1, RABGEF1, SEMA3C, TIE1, SEMA3A, NRG1, PLCB1, GPR173, PTPRK, RAP2A, SP100, PTGER4, BST2, PTPRG, SLIT2, SERPINF1, KRT16, TACSTD2, SEMA4F, CLIC4, RGCC, SEMA4C, SEMA4B, STC1, MCC, NFE2L2, SRGAP1, GSTP1, WNT5A, IFITM1, SPOCK3, C5, ZMYND8, CCL28, STARD13, TIMP1, SEMA5A, NKX2-1, PTN, CNN2, THBS1, ARHGDIB, DACH1, CORO1C, NOTC…	2	5.3e-08
GO:0006357	regulation of transcription from RNA polymerase II promoter	304	13	MEF2C, MEF2A, NOG, FST, EDN1, FSTL3, FSTL1, AURKB, RORA, HMGN5, MED20, EPC2, S1PR1, MC1R, HTRA1, FOXF2, SERPINE1, ILK, CREB3L1, HTRA3, OGT, CRY1, STAG1, RARG, RCOR1, NKX2-8, MED12, HMG20A, CD40, DCAF1, UHRF1, MED15, MCIDAS, PRDM5, RGCC, VGLL3, PRDM1, NFKBIA, HFE, MYBL1, TAGLN3, LIF, HEXIM1, NKX2-1, AGRN, ARNTL2, VEZF1, NKX2-5, PLAG1, KLF5, BMP4, ASXL2, KLF7, BMP2, KLF12, KLF10, MAML2, ASXL1, SMAD…	1.3	8.9e-08
GO:0043086	negative regulation of catalytic activity	158	6.7	CAST, STK38, MMP9, PTPN22, AQP1, IQGAP1, TGFB2, SHB, PICALM, CD44, SERPINE2, CDKN2D, ILK, SERPINE1, SPRED2, SPRED1, PI16, TFPI2, CEP85, WFDC10B, IRS2, ROCK1, BST2, ROCK2, SOCS3, CST1, SOCS4, SPOCD1, PKIA, FARP1, PLAUR, HHEX, SERPINF1, ANXA8L1, CST4, ANOS1, LRRK2, TNFAIP3, WFDC2, MVP, WFDC3, CCDC8, CAV1, DBNDD2, GNAI2, TIMP4, PXK, TIMP2, SERPINH1, TIMP1, DUSP18, IRAK3, UBASH3B, HEXIM1, PTK6, FBXO4…	1.5	8.1e-08
GO:0046903	secretion	197	8.4	MEF2C, SYT1, LTBP2, LTBP4, EDN1, PTPN22, AQP1, NOV, SERPINE2, GAB2, BRPF3, CTGF, WNK4, SERPINE1, CREB3L1, RAPGEF4, ADAM8, CRY1, PIK3CG, GBP5, KIF5B, CD40, VEGFC, UNC13D, RGCC, STC1, CDK5R2, C11ORF63, GSDMD, HFE, ARFGEF2, RIMS2, LIF, SLC29A1, LGALS3BP, RAC2, STX11, GAD1, IL1RAPL1, RHBDF2, IL1RL1, ECM1, GAS6, NKX6-1, PTPN11, NOTCH1, PLA2G4A, CD58, MARCKS, SYTL3, ENG, NCOR2, STEAP3, FOXA2, FAM3C, SY…	1.4	8.8e-08
GO:0006897	endocytosis	131	5.6	SYT1, PEAR1, PDLIM7, TGFB1, DAB2, PICALM, SERPINE1, RABGEF1, PIK3CA, DNAJC6, EGFR, PIK3CG, ACTN4, MFGE8, MYH9, MIB1, NPC1, CD163L1, UNC13D, LRP10, OPHN1, LRRK2, SSC5D, ANKFY1, WNT5A, SNX9, CAV2, CAV1, SNAP91, HFE, ITGB2, ABCA1, ITGB1, PTK2, DOCK2, LGALS3BP, ITGAV, FCHO2, CUBN, LGALS3, MYO1E, TGFBR2, MRC2, NCKAP1L, ITGA2, TINAGL1, GAS6, NCKAP1, CORO1C, MYO10, CORO1A, APOL1, NEDD4, PLCG2, LDLR, MYO…	1.6	8e-08
GO:0022402	cell cycle process	235	10	KIFC1, EDN1, RANGAP1, AURKA, AURKB, HMGN5, MEI1, BRINP2, RAE1, CTGF, INCENP, ILK, CEP290, CCNA1, CRY1, STAG1, PLD6, ROCK2, LIG1, PIM1, ESPL1, UBR2, GPR132, GEM, OPTN, MYH9, CEP152, DCTN1, UHRF2, SGO2, SGO1, RGCC, KIF4A, TICRR, AHCTF1, CEP164, CNTRL, LIF, NUP50, OBSL1, PRPF40A, BMP4, MKI67, TGFBR1, SMAD3, ALMS1, SPDL1, PIBF1, CDC27, ATM, GAS6, PTPN11, CSPP1, NOTCH2, EPS8, WDR62, TMOD3, BACH1, CLSP…	1.4	9.5e-08
GO:1990138	neuron projection extension	42	1.8	NRP2, WNT5A, SYT1, PLXNC1, PLXNA2, TNFRSF12A, TRPV2, L1CAM, AURKA, RIMS2, ITGB1, CDH4, IQGAP1, VCL, SEMA5A, MACF1, TIAM1, SEMA7A, BCL11A, SEMA3E, ILK, SEMA3C, PAFAH1B1, SEMA3A, PLXND1, NRG1, GOLGA4, DCLK1, FN1, FLRT3, CPNE5, MAP1B, NLGN3, RAPH1, SLIT2, SEMA6B, SEMA4F, SEMA4C, CPNE1, SEMA4B, SMURF1, SYT17	2.4	4.9e-08
GO:1902107	positive regulation of leukocyte differentiation	40	1.7	IL18, CSF1, IL15, IL7R, GLI3, TGFB1, FLT3LG, LIF, ZFP36L1, SHB, GATA3, IL4R, HLX, CASP8, IL15RA, OGT, RUNX1, TRAF6, ADAM8, AP3B1, PRKCA, IL6, LGALS3, KLF10, HCLS1, LGALS1, TGFBR2, ANXA1, AXL, LEF1, NCKAP1L, RB1, MMP14, NLRP3, GAS6, CD83, RIPK1, IL12A, CA2, PRDM1	2.4	4.8e-08
GO:1903706	regulation of hemopoiesis	76	3.2	MEF2C, IL18, FSTL3, TLR4, IL15, ZEB1, GLI3, TGFB1, FLT3LG, SHB, SMAP1, ISG15, GATA3, IL4R, HLX, CASP8, IL15RA, OGT, ADAM8, FANCA, CEACAM1, AP3B1, ZFP36, PRKCA, RBFOX2, RARG, LEF1, CDK6, RB1, HLA-B, NLRP3, MMP14, SIGLEC15, CARD11, CD83, INHBA, CAMK4, RIPK1, IL12A, FOXC1, PRDM1, NFE2L2, CA2, CSF3, CSF1, NFKBIA, IL7R, LIF, ZFP36L1, ZFP36L2, MEIS2, UBASH3B, SOS1, CYP26B1, RUNX1, TRAF6, BMP4, IL6, CEB…	1.8	7e-08
GO:0016032	viral process	177	7.6	PVR, MEF2C, XPO1, XRCC4, MICB, ZC3HAV1, IL6ST, BTRC, PTPN22, TSPAN7, IL15, PMAIP1, MMP1, APOBEC3C, TGFB1, ISG20, APOBEC3D, NLRC5, ISG15, MDFIC, HTRA1, RAE1, GATA3, DDX21, MX2, SATB1, BST2, ROCK2, RCOR1, EFNB2, RBL1, HLA-A, UBR4, MFGE8, IFI44, HLA-B, LIG4, CD40, DCAF1, DDIT4, NPC1, UNC13D, MST1R, PDCD6IP, TNFAIP3, GBP3, GBP1, FBXL2, CAV2, IFIH1, CAV1, IFITM1, IFITM2, IFITM3, OAS3, NFKBIA, OAS1, HS…	1.5	9.6e-08
GO:0051050	positive regulation of transport	170	7.3	SYT1, PTGS2, IL18, XPO4, EDN1, TLR2, PTPN22, TLR4, ANKRD1, PMAIP1, AQP1, IL17RA, TGFB1, TGFB2, GSTM2, DAB2, ANK2, GAB2, GATA3, WNK4, SERPINE1, CEP290, ASPH, ADAM8, EGFR, IRS2, KIF5B, ACTN4, C2CD5, UGCG, MFGE8, ACTN2, HLA-E, IRS1, VEGFC, MIB1, UNC13D, RGCC, STC1, PAEP, NFE2L2, PDCD6IP, ANKFY1, CRACR2A, WNT5A, FGFR1, CAV1, CDK5R2, ADORA2B, GSDMD, HFE, NFKBIA, ABCA1, SEMA5A, DOCK2, RAC2, HNMT, P2RY2…	1.5	9.7e-08
GO:0044764	multi-organism cellular process	178	7.6	PVR, MEF2C, XPO1, XRCC4, MICB, ZC3HAV1, IL6ST, BTRC, PTPN22, TSPAN7, IL15, PMAIP1, MMP1, APOBEC3C, TGFB1, ISG20, APOBEC3D, NLRC5, ISG15, MDFIC, HTRA1, RAE1, GATA3, DDX21, MX2, SATB1, BST2, ROCK2, RCOR1, EFNB2, RBL1, HLA-A, UBR4, MFGE8, IFI44, HLA-B, LIG4, CD40, DCAF1, DDIT4, NPC1, UNC13D, MST1R, PDCD6IP, TNFAIP3, GBP3, GBP1, FBXL2, CAV2, IFIH1, CAV1, IFITM1, IFITM2, IFITM3, GSDMD, OAS3, NFKBIA, O…	1.5	9.8e-08
GO:0050817	coagulation	81	3.5	GNA13, GNA15, TLN1, FOXA2, PDGFA, F13A1, FERMT3, EDN1, TLR4, VCL, SERPINE2, HPSE, SAA1, GATA3, SERPINA5, ILK, SERPINE1, PIK3CA, PDGFC, SERPINA1, PDGFD, DOCK11, TFPI2, ANO6, CEACAM1, RHOG, AP3B1, PIK3CG, PRKCA, STX2, RCOR1, ACTN1, CD40, MYH9, PRKCE, FLNA, PLAUR, THBD, GNAQ, ANXA8L1, F3, LNPK, JMJD1C, NFE2L2, PROS1, CAV1, ITGB3, FAM46A, MYL9, PROCR, RAC2, UBASH3B, SH2B3, EHD1, THBS1, PAPSS2, EHD2, …	1.8	7.8e-08
GO:0007599	hemostasis	81	3.5	GNA13, GNA15, TLN1, FOXA2, PDGFA, F13A1, FERMT3, EDN1, TLR4, VCL, SERPINE2, HPSE, SAA1, GATA3, SERPINA5, ILK, SERPINE1, PIK3CA, PDGFC, SERPINA1, PDGFD, DOCK11, TFPI2, ANO6, CEACAM1, RHOG, AP3B1, PIK3CG, PRKCA, STX2, RCOR1, ACTN1, CD40, MYH9, PRKCE, FLNA, PLAUR, THBD, GNAQ, ANXA8L1, F3, LNPK, JMJD1C, NFE2L2, PROS1, CAV1, ITGB3, FAM46A, MYL9, PROCR, RAC2, UBASH3B, SH2B3, EHD1, THBS1, PAPSS2, EHD2, …	1.8	7.8e-08
GO:0016049	cell growth	94	4	NRP2, SYT1, FOXK1, PLXNA2, TRPV2, EDN1, PPARG, CRABP2, GJA1, OSGIN1, L1CAM, AURKA, IQGAP1, TGFB1, TGFB2, VCL, NOV, NRCAM, BDNF, WDR36, SERPINE2, TIAM1, SEMA7A, CDKN2D, SEMA3E, ILK, SEMA3C, SEMA3A, NRG1, GOLGA4, SERTAD1, SERTAD2, EGFR, RARG, BST2, NOL8, FBP1, LEF1, MMP14, NDNF, SLIT2, INHBA, SEMA4F, SEMA4C, ADAM17, SEMA4B, EMP3, EMP1, WNT5A, DCBLD2, PLXNC1, TNFRSF12A, FHL1, PML, SFN, ITGB3, RIMS2,…	1.7	8.4e-08
GO:0051897	positive regulation of protein kinase B signaling	30	1.3	CSF3, GCNT2, PDGFA, IL18, TCF7L2, TGFB1, SEMA5A, AKR1C3, SPRY2, PTK2, MEIS3, MC1R, HPSE, GATA3, ILK, NRG1, THBS1, ADAM8, EGFR, PIK3CG, IL6, TGFBR1, HCLS1, AXL, RICTOR, GAS6, F3, CPNE1, HBEGF, MST1R	2.8	4.6e-08
GO:0031328	positive regulation of cellular biosynthetic process	288	12.3	MEF2C, RAB3GAP2, NOG, MEF2A, ADCY7, PTGS2, EDN1, FSTL3, AURKB, RORA, HMGN5, PICALM, S1PR1, MC1R, SERPINE1, FOXF2, ILK, CREB3L1, CEP290, OGT, STAG1, RARG, NKX2-8, MED12, CD40, MECOM, UHRF1, CAMK4, MCIDAS, RGCC, TGFB1I1, ZNF516, AKAP12, NFKBIA, AFAP1L2, MYBL1, LIF, PPP1R3G, NKX2-1, AGRN, ARNTL2, NKX2-5, PLAG1, BMP4, KLF5, ASXL2, KLF6, KLF7, BMP2, KLF12, TGFBR1, MAML2, ASXL1, SMAD3, NKX6-1, ATM, CCT…	1.3	1.3e-07
GO:0010562	positive regulation of phosphate metabolic process	189	8.1	DLC1, MEF2C, ADCY7, IL6ST, PDGFA, MMP9, IL18, EDN1, CSPG4, TNFSF15, IQGAP3, PTPN22, TTK, TLR4, IL15, LPAR1, TLR6, TGFB1, IQGAP1, IL11, IL31RA, TGFB2, MAP3K7, DAB2, CD44, MC1R, MDFIC, CTGF, TIAM1, SEMA7A, ILK, PIK3CA, PDGFC, PELI2, PDGFD, ADAM8, EGFR, PIK3CG, PID1, ROCK2, SOCS3, PIM1, CD40, IRS1, STK4, PLAUR, PTHLH, VEGFC, SPAG9, PLCE1, RGCC, PDE5A, NPTN, MST1R, LRRK2, WNT5A, TNFRSF6B, SNX9, FGFR1…	1.4	1.2e-07
GO:0045937	positive regulation of phosphorus metabolic process	189	8.1	DLC1, MEF2C, ADCY7, IL6ST, PDGFA, MMP9, IL18, EDN1, CSPG4, TNFSF15, IQGAP3, PTPN22, TTK, TLR4, IL15, LPAR1, TLR6, TGFB1, IQGAP1, IL11, IL31RA, TGFB2, MAP3K7, DAB2, CD44, MC1R, MDFIC, CTGF, TIAM1, SEMA7A, ILK, PIK3CA, PDGFC, PELI2, PDGFD, ADAM8, EGFR, PIK3CG, PID1, ROCK2, SOCS3, PIM1, CD40, IRS1, STK4, PLAUR, PTHLH, VEGFC, SPAG9, PLCE1, RGCC, PDE5A, NPTN, MST1R, LRRK2, WNT5A, TNFRSF6B, SNX9, FGFR1…	1.4	1.2e-07
GO:0032990	cell part morphogenesis	154	6.6	SYT1, MEF2A, S100A6, NOG, PLXNA2, CRABP2, L1CAM, AURKA, ITPKA, IQGAP1, TGFB2, VCL, NRCAM, BDNF, PICALM, TIAM1, ROBO1, GATA3, SEMA7A, ILK, RAB23, CEP290, EGFR, PID1, RBFOX2, KIF5B, EFNB2, NKX2-8, FARP1, CEP162, MCIDAS, ANOS1, OPHN1, SLITRK6, EXT1, LRRK2, SLITRK5, WNT5A, PLXNC1, C11ORF63, TNFRSF12A, TMEM216, ASAP1, CEP164, RIMS2, ITGB1, EPHB2, SEMA5A, PTK2, MACF1, OBSL1, NKX2-1, SKIL, B3GNT2, PLXND…	1.5	1.1e-07
GO:1902105	regulation of leukocyte differentiation	61	2.6	IL18, FSTL3, TLR4, IL15, ZEB1, GLI3, TGFB1, FLT3LG, SHB, GATA3, IL4R, HLX, CASP8, IL15RA, OGT, ADAM8, FANCA, CEACAM1, AP3B1, PRKCA, LEF1, CDK6, HLA-B, RB1, MMP14, NLRP3, SIGLEC15, CARD11, CD83, INHBA, CAMK4, RIPK1, IL12A, CA2, PRDM1, CSF1, IL7R, LIF, ZFP36L1, ZFP36L2, UBASH3B, SOS1, CYP26B1, RUNX1, TRAF6, BMP4, IL6, CEBPB, LGALS3, LGALS1, KLF10, HCLS1, FBN1, TGFBR2, AXL, ANXA1, NCKAP1L, GAS6, CLP…	2	8e-08
GO:0001822	kidney development	65	2.8	MEF2C, NOG, PDGFA, FSTL3, SDC4, GLI3, IQGAP1, TGFB1, TGFB2, SPRY1, OSR1, GATA3, WNK4, PAX8, ILK, CEP290, YAP1, PDGFD, FGF1, EGR1, EFNB2, SIX2, BASP1, SIX4, SLIT2, FMN1, PLCE1, TNS2, ACVR2B, SERPINF1, TACSTD2, SIX1, HAS2, FOXC1, CA2, LRRK2, FRAS1, FGFR1, ADAMTS16, GLIS2, TIPARP, C5ORF42, SOX9, LIF, NIPBL, FAT4, PCSK9, PCSK5, BMP4, BMP2, MYO1E, TGFBR1, PODXL, FBN1, CENPF, SMAD3, ITGA3, WWTR1, STAT1…	1.9	9e-08
GO:0009891	positive regulation of biosynthetic process	292	12.5	MEF2C, RAB3GAP2, NOG, MEF2A, ADCY7, PTGS2, EDN1, FSTL3, AURKB, RORA, HMGN5, PICALM, S1PR1, MC1R, CTGF, SERPINE1, FOXF2, ILK, CREB3L1, CEP290, OGT, STAG1, RARG, NKX2-8, MED12, CD40, MECOM, UHRF1, CAMK4, MCIDAS, RGCC, HAS2, TGFB1I1, ZNF516, AKAP12, NFKBIA, AFAP1L2, MYBL1, LIF, PPP1R3G, NKX2-1, AGRN, ARNTL2, NKX2-5, PLAG1, BMP4, KLF5, ASXL2, KLF6, KLF7, BMP2, KLF12, TGFBR1, MAML2, ASXL1, SMAD3, NKX6…	1.3	1.5e-07
GO:1901342	regulation of vasculature development	61	2.6	PTGS2, PDGFA, TNFSF12, AQP1, TSPAN12, SEMA3E, SERPINE1, CCBE1, TIE1, PDGFD, FGF1, CEACAM1, PRKCA, EGR1, SP100, ROCK1, ROCK2, EFNB2, VEGFC, HHEX, ADM, SERPINF1, F3, RGCC, FOXC1, NFE2L2, TNFAIP3, WNT5A, TNFRSF12A, C3, C5, PML, CXCL8, ITGB2, STARD13, SEMA5A, CCL24, PTN, RUNX1, THBS1, PLXND1, ANGPTL4, BMP4, IL6, COL4A2, TGFBR2, SPHK1, STAT1, ECM1, ANXA3, EPHA2, NOTCH1, SRPX2, ITGA5, ID1, ETS1, TBXA2R…	2	9.4e-08
GO:0002252	immune effector process	142	6.1	PVR, MICB, ZC3HAV1, IL18, PTPN22, TLR4, IL15, PMAIP1, RORA, TGFB1, APOBEC3C, TGFB2, APOBEC3D, ISG20, IL31RA, CFP, MAP3K7, NLRC5, SHB, GAB2, ISG15, HTRA1, GATA3, SEMA7A, CFH, RABGEF1, PIK3CA, MX2, PIK3CG, BST2, RELB, HLA-A, HLA-B, LIG4, CD40, HLA-E, DDIT4, UNC13D, CAMK4, RGCC, TNFAIP3, GBP3, GBP1, WNT5A, IFIH1, IFITM1, ADORA2B, IFITM2, IFITM3, OAS3, HFE, OAS1, OAS2, IRAK3, PTK2, DOCK2, RAC2, TRAF6…	1.5	1.4e-07
GO:0010976	defense response to virus	58	2.5	MICB, ZC3HAV1, PTPN22, IFI44L, IL15, PMAIP1, APOBEC3C, APOBEC3D, ISG20, NLRC5, TMEM173, AP1S2, ISG15, HTRA1, DDX60, TRIM6, MX2, BST2, HLA-A, HERC5, IFI16, CD40, NLRP3, DDIT4, UNC13D, MB21D1, TNFAIP3, GBP3, GBP1, AP1M1, IFIH1, IFITM1, IFITM2, IFITM3, PML, OAS3, OAS1, OAS2, SEC14L1, DOCK2, DHX58, IL6, SAMHD1, BIRC3, STAT1, IFIT3, IRF9, DDX58, IFIT2, PLSCR1, ABCC9, IFIT1, OASL, KCNJ8, FYN, IFIT5, IR…	2	1e-07
GO:0051607	positive regulation of neuron projection development	58	2.5	SYT1, TRPV2, CRABP2, L1CAM, ANKRD1, LPAR1, ITPKA, IQGAP1, SETX, BDNF, TIAM1, ROBO1, SEMA7A, IL1RAP, ILK, NRG1, NEGR1, GOLGA4, ENC1, NDNF, SLIT2, SERPINF1, NPTN, CNTN1, CLIP1, NFE2L2, CAMK1D, WNT5A, FGFR1, TNFRSF12A, RIMS2, ZMYND8, CDH4, SCARF1, SEMA5A, MACF1, PTK6, BCL11A, PTN, OBSL1, PAFAH1B1, SKIL, IL1RAPL1, TMEM30A, FN1, IL6, LTK, CPNE5, MAP1B, ITGA3, SHANK1, SHOX2, EPHA4, FYN, TENM3, SMURF1, …	2	1e-07
GO:0045216	cell-cell junction organization	56	2.4	PVR, DLC1, TLN1, TLN2, FERMT2, GJA1, RASSF8, SDC4, IQGAP1, TGFB1, KIFC3, VCL, TGFB2, ANK2, SLK, CNTNAP1, AFDN, PRKCA, PTPRK, ROCK1, ACTN4, ROCK2, PKN2, ACTN1, NECTIN3, ACTN2, MMP14, MYADM, ECT2, FMN1, PPM1F, XIRP2, CAV1, PARD3, LIMS2, CDH4, PTK2, MACF1, HEG1, UGT8, THBS1, APC, RAB8B, TGFBR1, S100A10, ITGA2, NLGN2, SMAD3, SNAI2, GJB2, AJUBA, CORO1C, LAMA5, CDH18, TRIP6, PHLDB2	2	1e-07
GO:0009792	embryo development ending in birth or egg hatching	117	5	MEF2C, DLC1, GNA13, NOG, PLXNA2, EDN1, LUZP1, HOXD1, TGFB1, MTHFD1L, TGFB2, GATA3, PLOD3, EGFR, SATB2, RARG, SOCS3, RRP7A, MED12, SIX2, HES7, SIX4, LIG4, MYH9, STK4, JUNB, HHEX, MIB1, HOXD3, TANC2, SIX1, HOXD4, PRDM1, EXT1, WNT5A, FGFR1, PPP2R3A, FAM212A, ITGB1, LIF, ECE1, NIPBL, HEG1, SKIL, TRAF6, RUNX2, NKX2-5, MUC1, BMP4, MAFF, BMP2, EPAS1, TGFBR1, MYO1E, TGFBR2, SMAD3, BRCA2, TEAD2, CELSR1, E…	1.6	1.5e-07
GO:0042326	negative regulation of phosphorylation	92	3.9	PPARA, NOG, STK38, FOXA2, PTPN22, SPINK1, TLR4, TGFB1, LATS2, SPRY4, SPRY2, HSPH1, SHB, SPRY1, CDKN2D, ILK, SPRED2, RABGEF1, SPRED1, RNF149, FAM129A, TNIP1, ERRFI1, CEACAM1, PID1, CEP85, IRS2, SOCS3, FBP1, PDE4D, SOCS4, RB1, MECOM, UBE2C, MYADM, PKIA, SLIT2, DDIT4, PPM1F, HHEX, INHBA, GNAQ, ZFYVE28, TNFAIP3, PRNP, GADD45B, LRRK2, PPP1R15A, GADD45A, GSTP1, GBP1, MVP, CAV1, PARD3, DBNDD2, ATG14, SF…	1.7	1.3e-07
GO:0043009	chordate embryonic development	116	5	MEF2C, DLC1, GNA13, NOG, PLXNA2, EDN1, LUZP1, HOXD1, TGFB1, MTHFD1L, TGFB2, GATA3, PLOD3, EGFR, SATB2, RARG, SOCS3, RRP7A, MED12, SIX2, HES7, SIX4, LIG4, MYH9, STK4, JUNB, HHEX, MIB1, HOXD3, TANC2, SIX1, HOXD4, PRDM1, EXT1, WNT5A, FGFR1, PPP2R3A, FAM212A, ITGB1, LIF, ECE1, NIPBL, HEG1, SKIL, TRAF6, RUNX2, NKX2-5, MUC1, BMP4, MAFF, BMP2, EPAS1, TGFBR1, MYO1E, TGFBR2, SMAD3, BRCA2, TEAD2, CELSR1, E…	1.6	1.5e-07
GO:0043405	regulation of MAP kinase activity	75	3.2	MEF2C, STK38, PDGFA, EDN1, CSPG4, IQGAP3, PTPN22, TLR4, LPAR1, TLR6, IQGAP1, TGFB1, SPRY4, MAP3K7, SPRY2, SPRY1, NOD1, CXCR4, SAA1, MDFIC, TIAM1, ILK, SPRED2, PDGFC, SPRED1, PAK1, PDGFD, ADAM8, FGF1, NRG1, EGFR, IRAK2, PIK3CG, CD40, SPAG9, PLCE1, CRKL, RIPK1, PDE5A, MST1R, LRRK2, GADD45B, GADD45A, GSTP1, WNT5A, FGFR1, CAV1, GNAI2, ADORA2B, C5, AKAP13, MAP3K7CL, TRIB2, IRAK3, DUSP18, MAP3K1, TRAF6…	1.8	1.3e-07
GO:0085029	extracellular matrix assembly	15	0.6	ATP7A, TNXB, FBLN5, PLOD3, RGCC, THSD4, MYH11, SMAD3, HAS2, LOX, ANTXR1, SOX9, PHLDB2, TGFB1, GAS6	4.8	2.9e-08
GO:0050878	regulation of body fluid levels	104	4.4	GNA13, GNA15, ADCY7, PDGFA, F13A1, EDN1, TLR4, AQP1, VCL, SERPINE2, WNK4, GATA3, SERPINE1, ILK, PIK3CA, PDGFC, PDGFD, TFPI2, PIK3CG, RCOR1, ACTN1, CD40, MYH9, PLAUR, THBD, KRT16, ANXA8L1, F3, LNPK, HAS2, NFE2L2, PAM, CAV1, C11ORF63, ITGB3, MYL9, EPHB2, SLC29A1, PROCR, RAC2, UBASH3B, P2RY2, HEG1, PLAT, MAFF, DOCK9, ITGA2, GAS6, PTPN11, ATP7A, P2RX5, FLG, CD59, PLCG2, TBXA2R, HIST1H3C, NCOR2, PLAU,…	1.6	1.6e-07
GO:0001933	negative regulation of protein phosphorylation	86	3.7	NOG, STK38, PTPN22, SPINK1, TLR4, LATS2, TGFB1, SPRY4, SPRY2, HSPH1, SHB, SPRY1, CDKN2D, ILK, SPRED2, RABGEF1, SPRED1, RNF149, FAM129A, TNIP1, ERRFI1, CEACAM1, PID1, CEP85, SOCS3, PDE4D, SOCS4, RB1, MECOM, UBE2C, MYADM, PKIA, SLIT2, DDIT4, PPM1F, HHEX, GNAQ, ZFYVE28, TNFAIP3, PRNP, GADD45B, LRRK2, PPP1R15A, GADD45A, GSTP1, GBP1, MVP, CAV1, PARD3, DBNDD2, ATG14, SFN, GPRC5A, TRIB2, LIF, IRAK3, DUS…	1.7	1.5e-07
GO:0051223	regulation of protein transport	142	6.1	XPO1, PTGS2, XPO5, IL18, XPO4, TLR2, PTPN22, RANGAP1, TLR4, ANKRD1, TLR6, TGFB1, IL17RA, TGFB2, NOV, DAB2, TIAM1, MDFIC, GATA3, SLC2A1, RAB23, RABGEF1, CEP290, RAPGEF4, ASPH, ADAM8, EGFR, IRS2, KIF5B, C2CD5, UGCG, CD40, ARNTL, HLA-E, IRS1, PKIA, MAP4K4, VEGFC, RGCC, PAEP, LRRK2, SSC5D, GBP1, WNT5A, PAM, NFKBIE, GSDMD, NFKBIA, SEMA5A, RAC2, HNMT, TRAF6, SH3TC2, TMEM30A, SRGN, FN1, RHBDF2, BMP4, CA…	1.5	2e-07
GO:0035455	response to interferon-alpha	13	0.6	IFIT3, IFIT2, LAMP3, BST2, IFITM1, IFITM2, IFITM3, GATA3, AXL, OAS1, TPR, MX2, GAS6	5.4	2.5e-08
GO:0032963	collagen metabolic process	35	1.5	MMP9, PPARG, ITGB1, SERPINH1, MMP1, TGFB1, P3H2, TRAM2, P3H3, COL7A1, CTGF, COL6A3, COL6A2, COL12A1, CREB3L1, COL8A1, ERRFI1, COL18A1, BMP4, IL6, COL4A2, TNXB, COL4A1, COL13A1, MRC2, MMP19, ITGA2, CTSS, MMP14, FURIN, COL5A1, TNS2, ID1, RGCC, ENG	2.5	1e-07
GO:0010594	multicellular organismal macromolecule metabolic process	36	1.5	WNT5A, NRP2, FGFR1, PTGS2, EDN1, ITGB3, AMOTL1, TGFB1, STARD13, SEMA5A, PTK2, GATA3, CCBE1, FGF1, THBS1, CEACAM1, PRKCA, BMP4, SP100, ROCK2, MET, SLIT2, EPHA2, ANXA3, VEGFC, NOTCH1, SRPX2, SERPINF1, ETS1, MAPK14, RGCC, STC1, SH3BGRL3, NFE2L2, HDAC9, KLF4	2.5	1.1e-07
GO:0044259	regulation of endothelial cell migration	36	1.5	MMP9, PPARG, ITGB1, SERPINH1, MMP1, TGFB1, P3H2, AKR1C3, TRAM2, P3H3, COL7A1, CTGF, COL6A3, COL6A2, COL12A1, CREB3L1, COL8A1, ERRFI1, BMP4, COL18A1, IL6, COL4A2, TNXB, COL4A1, COL13A1, MRC2, MMP19, ITGA2, CTSS, MMP14, FURIN, COL5A1, TNS2, ID1, RGCC, ENG	2.5	1.1e-07
GO:0044419	interspecies interaction between organisms	180	7.7	PVR, MEF2C, XPO1, XRCC4, MICB, ZC3HAV1, IL6ST, BTRC, PTPN22, TSPAN7, IL15, PMAIP1, AQP1, MMP1, APOBEC3C, TGFB1, ISG20, APOBEC3D, NLRC5, ISG15, MDFIC, HTRA1, RAE1, GATA3, DDX21, MX2, SATB1, BST2, ROCK2, RCOR1, EFNB2, RBL1, HLA-A, UBR4, MFGE8, IFI44, HLA-B, LIG4, CD40, DCAF1, DDIT4, NPC1, UNC13D, MST1R, PDCD6IP, TNFAIP3, GBP3, GBP1, FBXL2, CAV2, IFIH1, CAV1, IFITM1, IFITM2, IFITM3, OAS3, NFKBIA, OA…	1.4	2.3e-07
GO:0044403	symbiosis, encompassing mutualism through parasitism	180	7.7	PVR, MEF2C, XPO1, XRCC4, MICB, ZC3HAV1, IL6ST, BTRC, PTPN22, TSPAN7, IL15, PMAIP1, AQP1, MMP1, APOBEC3C, TGFB1, ISG20, APOBEC3D, NLRC5, ISG15, MDFIC, HTRA1, RAE1, GATA3, DDX21, MX2, SATB1, BST2, ROCK2, RCOR1, EFNB2, RBL1, HLA-A, UBR4, MFGE8, IFI44, HLA-B, LIG4, CD40, DCAF1, DDIT4, NPC1, UNC13D, MST1R, PDCD6IP, TNFAIP3, GBP3, GBP1, FBXL2, CAV2, IFIH1, CAV1, IFITM1, IFITM2, IFITM3, OAS3, NFKBIA, OA…	1.4	2.3e-07
GO:0042327	positive regulation of phosphorylation	170	7.3	MEF2C, ADCY7, PDGFA, IL6ST, MMP9, IL18, EDN1, CSPG4, TNFSF15, IQGAP3, PTPN22, TTK, TLR4, IL15, LPAR1, TLR6, TGFB1, IQGAP1, IL11, IL31RA, TGFB2, MAP3K7, DAB2, CD44, MDFIC, TIAM1, CTGF, SEMA7A, ILK, PIK3CA, PDGFC, PELI2, PDGFD, ADAM8, EGFR, PIK3CG, SOCS3, ROCK2, PIM1, CD40, IRS1, STK4, PLAUR, VEGFC, SPAG9, PLCE1, RGCC, PDE5A, NPTN, MST1R, LRRK2, WNT5A, TNFRSF6B, SNX9, FGFR1, CAV2, CAV1, GCNT2, CDK5…	1.4	2.4e-07
GO:0043900	regulation of multi-organism process	83	3.5	MICB, RSF1, ZC3HAV1, PTPN22, SPINK1, AURKA, IL15, APOBEC3C, ACVR1C, ISG20, APOBEC3D, SHB, EDNRB, TMEM173, NOD1, AP1S2, ISG15, TRIM8, HTRA1, GSN, MDFIC, DDX60, TRIM6, PLCB1, TOP2A, TNIP1, ZFP36, PRKCA, SP100, BST2, LY96, DDB1, HLA-A, HERC5, PKN2, LEF1, IFI16, HMGA2, SRPK1, STOM, INHBA, MB21D1, PDE5A, PRDM1, TNFAIP3, CAV2, CAV1, AP1M1, IFITM1, IFITM2, IFITM3, OAS3, PML, CXCL8, OAS1, SEC14L1, POLR2A…	1.7	1.9e-07
GO:0014070	response to organic cyclic compound	166	7.1	MEF2C, LYPD1, ZC3HAV1, PTGS2, IL18, BTRC, EDN1, TLR2, ANKRD1, IL15, RORA, PMAIP1, AQP1, TGFB1, KANK2, TGFB2, ATP2B1, GSTM2, DAB2, TIAM1, RAE1, CTGF, CDKN2D, PDE4B, DDX21, ASPH, LOX, CRY1, EGFR, PIK3CG, RBFOX2, RNLS, RARG, ROCK2, MED12, PIM1, PDE4D, ARNTL, JUNB, DDIT4, NPC1, THBD, SERPINF1, CATSPER1, STC1, TGFB1I1, LRRK2, PAM, CAV1, BLM, GNAI1, PAQR7, NFKBIA, PAQR8, ABCA1, NR2C2, PAQR5, IRAK3, DYN…	1.5	2.5e-07
GO:0010557	positive regulation of macromolecule biosynthetic process	267	11.4	MEF2C, RAB3GAP2, NOG, MEF2A, EDN1, FSTL3, AURKB, RORA, HMGN5, PICALM, S1PR1, MC1R, CTGF, SERPINE1, FOXF2, ILK, CREB3L1, CEP290, OGT, STAG1, RARG, NKX2-8, MED12, CD40, MECOM, UHRF1, CAMK4, MCIDAS, RGCC, HAS2, TGFB1I1, ZNF516, NFKBIA, AFAP1L2, MYBL1, LIF, PPP1R3G, NKX2-1, ARNTL2, AGRN, NKX2-5, PLAG1, BMP4, KLF5, ASXL2, KLF6, KLF7, BMP2, KLF12, TGFBR1, MAML2, ASXL1, SMAD3, NKX6-1, ATM, CCT7, SHOX2, …	1.3	2.8e-07
GO:0007596	blood coagulation	77	3.3	GNA13, GNA15, TLN1, PDGFA, F13A1, FERMT3, EDN1, TLR4, VCL, SERPINE2, HPSE, SAA1, GATA3, SERPINA5, ILK, SERPINE1, PIK3CA, PDGFC, SERPINA1, PDGFD, DOCK11, TFPI2, ANO6, CEACAM1, RHOG, AP3B1, PIK3CG, PRKCA, RCOR1, ACTN1, CD40, MYH9, PRKCE, FLNA, PLAUR, THBD, GNAQ, ANXA8L1, F3, LNPK, JMJD1C, NFE2L2, PROS1, ITGB3, MYL9, PROCR, RAC2, UBASH3B, SH2B3, EHD1, THBS1, PAPSS2, EHD2, PLAT, ACTB, MAFF, IL6, AXL,…	1.8	2e-07
GO:0014031	mesenchymal cell development	46	2	S100A4, NRP2, WNT5A, NOG, GCNT2, FOXA2, EDN1, SOX9, TCF7L2, TGFB1, TGFB2, SEMA5A, EDNRA, EDNRB, DAB2, SEMA7A, SEMA3E, FOXF2, NKX2-1, SEMA3C, BCL9L, SEMA3A, NRG1, LOXL2, BMP4, BMP2, TGFBR1, TGFBR2, SMAD3, LEF1, HMGA2, WWTR1, SNAI2, CORO1C, NOTCH1, SEMA6B, LAMA5, SEMA4F, RGCC, SEMA4C, SEMA4B, HAS2, FOXC1, TGFB1I1, ENG, ACVR1	2.2	1.6e-07
GO:0045944	positive regulation of transcription from RNA polymerase II promoter	186	7.9	AKNA, MEF2C, NOG, MEF2A, IL18, EDN1, FSTL3, TLR2, TLR4, ANKRD1, RORA, TGFB1, IL11, SETX, NLRC5, RAD21, S1PR1, MC1R, GATA3, SERPINE1, ATF6B, FOXF2, CREB3L1, OGT, AKIRIN2, STAG1, EGFR, PID1, SATB2, RARG, NKX2-8, RELB, RBL1, MED12, SIX2, SIX4, CD40, ARNTL, AHR, JUNB, HHEX, UHRF1, MCIDAS, SIX1, RGCC, NFE2L2, WNT5A, NFKBIA, MYBL1, ELK3, SOX9, NR2C2, LIF, MEIS3, MEIS2, NIPBL, NKX2-1, ARNTL2, AGRN, TRAF…	1.4	2.8e-07
GO:0002062	chondrocyte differentiation	31	1.3	MEF2C, FGFR1, WNT5B, SOX9, GLI3, SERPINH1, TGFB1, NOV, OSR1, COL27A1, TGFBI, CHST11, ADAMTS12, RUNX1, LOXL2, RUNX2, BMP4, BMP2, RARG, TGFBR1, TGFBR2, EFEMP1, SIX2, SMAD3, SNAI2, HMGA2, PTHLH, SHOX2, ADAMTS7, MAPK14, MEX3C	2.7	1.3e-07
GO:0045765	regulation of angiogenesis	56	2.4	PTGS2, TNFSF12, AQP1, TSPAN12, SERPINE1, CCBE1, SEMA3E, TIE1, FGF1, CEACAM1, PRKCA, SP100, ROCK1, ROCK2, HHEX, VEGFC, ADM, SERPINF1, F3, RGCC, FOXC1, NFE2L2, TNFAIP3, WNT5A, TNFRSF12A, C3, C5, PML, CXCL8, ITGB2, STARD13, SEMA5A, CCL24, PTN, RUNX1, THBS1, PLXND1, ANGPTL4, IL6, COL4A2, TGFBR2, SPHK1, STAT1, ECM1, ANXA3, EPHA2, NOTCH1, SRPX2, ITGA5, ID1, ETS1, TBXA2R, JAK1, HDAC9, ENG, KLF4	2	2e-07
GO:0048667	cell morphogenesis involved in neuron differentiation	102	4.4	MEF2C, MEF2A, S100A6, NOG, PLXNA2, CRABP2, L1CAM, ITPKA, TGFB2, VCL, NRCAM, BDNF, PICALM, TIAM1, ROBO1, SEMA7A, GATA3, ILK, RBFOX2, KIF5B, NKX2-8, EFNB2, FARP1, OPHN1, ANOS1, LRRK2, EXT1, SLITRK6, SLITRK5, WNT5A, PLXNC1, TNFRSF12A, ITGB1, EPHB2, SEMA5A, PTK2, MACF1, OBSL1, NKX2-1, B3GNT2, SKIL, PLXND1, IL1RAPL1, FN1, KLF7, NR4A2, NTN4, SHANK1, NKX6-1, PTPN11, FEZF1, LAMA2, SHOX2, EPHA4, NOTCH1, S…	1.6	2.8e-07
GO:0002573	myeloid leukocyte differentiation	51	2.2	MEF2C, MMP9, PPARG, FAM20C, FSTL3, TLR4, TGFB1, IL31RA, GAB2, GATA3, CASP8, OGT, CEACAM1, PRKCA, BATF3, SH3PXD2A, BATF2, RELB, LEF1, CDK6, IFI16, RB1, MYH9, SIGLEC15, JUNB, INHBA, HHEX, CAMK4, RIPK1, CA2, CSF3, CSF2, CSF1, ZFP36L1, LIF, UBASH3B, PAFAH1B1, TRAF6, RUNX1, BMP4, CEBPB, KLF10, HCLS1, FBN1, TGFBR2, EPHA2, ANXA2, CASP10, PDE2A, MAPK14, TOB2	2.1	2e-07
GO:0030098	lymphocyte differentiation	71	3	LRRC8A, IL18, LEPR, PTPN22, IL15, RORA, ZEB1, GLI3, TGFB1, IL11, FLT3LG, SHB, CLCF1, GATA3, IL4R, HLX, IL15RA, ADAM8, FANCA, AP3B1, EGR1, SATB1, PTGER4, RELB, LEF1, CDK6, LIG4, NLRP3, DCAF1, MMP14, DCLRE1C, CARD11, CD83, INHBA, HHEX, CAMK4, IL12A, ADAM17, PRDM1, IL7R, ITGB1, STAT6, PLCL2, ZFP36L1, ZFP36L2, DOCK2, SOS1, CYP26B1, POU2F2, BCL3, RUNX2, BMP4, KLF6, FZD8, IL6, MSH2, LGALS1, TGFBR2, AXL…	1.8	3e-07
GO:0050919	negative chemotaxis	19	0.8	NRP2, WNT5A, FLRT3, FLRT2, PDGFA, ITGB3, SLIT2, SEMA5A, SEMA6B, ROBO1, SEMA4F, ITGAV, SEMA7A, SEMA3E, SEMA4C, SEMA4B, SEMA3C, SEMA3A, NRG1	3.7	1.2e-07
GO:0045935	positive regulation of nucleobase-containing compound metabolic process	274	11.7	MEF2C, NOG, MEF2A, ADCY7, EDN1, FSTL3, AURKB, RORA, HMGN5, PICALM, S1PR1, MC1R, SERPINE1, FOXF2, ILK, CREB3L1, CEP290, OGT, STAG1, RARG, NKX2-8, MED12, CD40, MECOM, UHRF1, CAMK4, MCIDAS, RGCC, TGFB1I1, ZNF516, AKAP12, NFKBIA, HSPA1A, AFAP1L2, MYBL1, LIF, NKX2-1, AGRN, ARNTL2, NKX2-5, PLAG1, BMP4, KLF5, ASXL2, KLF6, KLF7, BMP2, KLF12, TGFBR1, MAML2, ASXL1, SMAD3, NKX6-1, ATM, CCT7, SHOX2, NOTCH1, …	1.3	5.5e-07
GO:0031349	positive regulation of defense response	86	3.7	PVR, MEF2C, ZC3HAV1, LDLR, PTGS2, OSMR, IL6ST, IL18, BTRC, TLR2, PTPN22, GJA1, TLR4, IL15, TLR6, IL17RA, TGFB1, MAP3K7, NLRC5, TMEM173, NOD1, TRIM6, DDX60, CASP8, SERPINE1, PAK1, ADAM8, TNIP1, CHUK, COCH, EGFR, PIK3CG, IRAK2, GBP5, PTGER4, LY96, ICAM2, RELB, CTSS, IFI16, HLA-E, RFTN1, PRKCE, TANK, CARD11, EREG, MB21D1, RIPK1, IL12A, TNFAIP3, WNT5A, CAV1, IFIH1, ADORA2B, C3, GPSM3, NFKBIA, ITGB2, …	1.7	4.2e-07
GO:0050865	regulation of cell activation	102	4.4	MEF2C, IL6ST, PDGFA, IL18, PTPN22, TLR4, RORA, IL15, TGFB1, IL31RA, MAP3K7, SHB, SERPINE2, GAB2, CTGF, GATA3, RABGEF1, PIK3CA, IL15RA, ADAM8, EBI3, IRS2, BST1, EFNB2, HLA-A, CD40, HLA-E, PDCD1LG2, AHR, UNC13D, THBD, CAMK4, PDE5A, PRDM1, TNFAIP3, WNT5A, CAV1, ADORA2B, HFE, RAC2, UBASH3B, TRAF6, BMP4, PELI1, LGALS3, IL1RL1, LGALS1, TGFBR2, NCKAP1L, PIBF1, ATAD5, GAS6, ATM, PTPN11, CORO1A, CD55, CD5…	1.6	4.6e-07
GO:0046631	alpha-beta T cell activation	35	1.5	ELF4, IL18, HFE, PTPN22, RORA, IL15, GLI3, STAT6, HSPH1, SHB, DOCK2, GATA3, HLX, IL4R, BCL3, EBI3, AP3B1, SATB1, IL6, CEBPB, PTGER4, RELB, TGFBR2, ANXA1, HLA-A, NCKAP1L, LEF1, HLA-E, NLRP3, ATP7A, CD83, CD55, IL12A, IRF1, PRDM1	2.4	2.8e-07
GO:0051173	positive regulation of nitrogen compound metabolic process	289	12.3	MEF2C, NOG, MEF2A, ADCY7, PTGS2, EDN1, FSTL3, AURKB, RORA, HMGN5, PICALM, S1PR1, MC1R, FOXF2, SERPINE1, ILK, CREB3L1, CEP290, OGT, STAG1, RARG, NKX2-8, MED12, CD40, MECOM, UHRF1, CAMK4, MCIDAS, RGCC, HAS2, TGFB1I1, ZNF516, AKAP12, NFKBIA, HSPA1A, AFAP1L2, MYBL1, LIF, NKX2-1, AGRN, ARNTL2, NKX2-5, PLAG1, BMP4, KLF5, ASXL2, KLF6, KLF7, BMP2, KLF12, TGFBR1, MAML2, ASXL1, SMAD3, NKX6-1, ATM, CCT7, SH…	1.3	6.5e-07
GO:0001706	endoderm formation	22	0.9	COL4A2, NOG, MMP9, TBX20, ITGB2, HMGA2, MMP14, COL5A1, DUSP5, INHBA, DUSP4, LAMB3, DKK1, COL7A1, DUSP1, ITGA5, ITGAV, COL12A1, COL8A1, LAMB1, FN1, DUSP6	3.2	2e-07
GO:0032940	secretion by cell	173	7.4	MEF2C, SYT1, KCNC4, SNCAIP, LTBP2, PDGFA, F13A1, LTBP4, EDN1, TLR2, PTPN22, TLR4, ANKRD1, TLR6, IL17RA, TGFB1, IL11, TGFB2, VCL, NOV, ANK1, SERPINE2, GAB2, BRPF3, TIAM1, CTGF, GATA3, SLC2A1, SERPINE1, RABGEF1, CREB3L1, RAPGEF4, CRY1, ADAM8, EGFR, PIK3CG, IRS2, GBP5, KIF5B, ACTN4, ACTN1, ACTN2, ARNTL, CD40, HLA-E, IRS1, MAP4K4, VEGFC, UNC13D, RGCC, PAEP, PDCD6IP, LRRK2, SSC5D, TNFAIP2, GBP1, WNT5A…	1.4	6.3e-07
GO:0048588	developmental cell growth	49	2.1	NRP2, SYT1, PLXNA2, TRPV2, EDN1, CRABP2, AURKA, L1CAM, IQGAP1, VCL, BDNF, TIAM1, SEMA7A, ILK, SEMA3E, SEMA3C, SEMA3A, NRG1, GOLGA4, RARG, SLIT2, SEMA4F, SEMA4C, SEMA4B, WNT5A, PLXNC1, TNFRSF12A, SOX9, RIMS2, ITGB1, CDH4, SEMA5A, MACF1, BCL11A, PAFAH1B1, PLXND1, DCLK1, FN1, FLRT3, CPNE5, MAP1B, TGFBR2, NLGN3, RAPH1, SEMA6B, CPNE1, MEX3C, SMURF1, SYT17	2.1	3.9e-07
GO:0032496	response to lipopolysaccharide	69	2.9	MEF2C, PTGS2, IL18, EDN1, TLR2, PTPN22, TLR4, ANKRD1, FER, NOCT, TGFB1, EDNRB, CD96, TNFRSF11B, TRIM6, PDE4B, CASP8, SERPINE1, LOXL1, AKIRIN2, CHUK, IRAK2, ZFP36, PRKCA, ICAM1, PTGER4, LY96, PDE4D, CD40, NLRP3, PRKCE, JUNB, THBD, ADM, TNFRSF10D, IL12A, ADAM17, PRDM1, TNFAIP3, GSTP1, CSF3, WNT5A, TNFRSF6B, CXCL1, CSF2, TNFRSF25, CXCL3, CXCL2, NFKBIA, CXCL8, TIMP4, ABCA1, IRAK3, NR1D1, TRAF6, PELI1…	1.8	4.8e-07
GO:0007369	gastrulation	46	2	WNT5A, FGFR1, NOG, FOXA2, MMP9, TBX20, ITGB4, ITGB2, ITGB3, ITGB1, LAMB3, OSR1, COL7A1, ITGAV, COL12A1, LAMB1, COL8A1, FN1, BMP4, COL4A2, TGFBR2, SIX2, ITGA2, LEF1, SMAD3, ITGA3, HMGA2, MMP14, MYADM, FZD7, EPHA2, COL5A1, DUSP5, DUSP4, INHBA, HHEX, ACVR2B, DKK1, DUSP1, ITGA5, ETS2, FOXC1, EXT1, KLF4, ACVR1, DUSP6	2.1	4e-07
GO:0034446	substrate adhesion-dependent cell spreading	28	1.2	FERMT3, FERMT2, PEAK1, ITGB3, FER, ITGAV, ILK, LAMB1, FN1, KIF14, ACTN4, AXL, S100A10, DOCK5, FZD4, MYADM, FZD7, FLNA, CORO1C, UNC13D, CRKL, MELTF, TACSTD2, LAMA5, HAS2, ANTXR1, GBP1, PARVA	2.7	2.8e-07
GO:0051216	cartilage development	48	2	WNT5A, MEF2C, FGFR1, NOG, WNT5B, EDN1, ZEB1, SOX9, SERPINH1, GLI3, TGFB1, TIMP1, TGFB2, NOV, CD44, OSR1, ITGB8, CTGF, COL27A1, CHST11, TGFBI, ADAMTS12, RUNX1, LOXL2, RUNX2, CYR61, BMP4, BMP2, SATB2, RARG, TGFBR1, TGFBR2, EFEMP1, SIX2, SMAD3, HMGA2, SNAI2, ATP7A, PTHLH, SHOX2, HOXB3, ADAMTS7, HOXD3, MAPK14, MEX3C, LNPK, STC1, CARM1	2.1	4.2e-07
GO:0008285	negative regulation of cell proliferation	125	5.3	DLC1, MEF2C, NOG, PTGS2, TLR2, IL15, PMAIP1, TGFB1, KANK2, TGFB2, NOV, SERPINE2, ROBO1, GATA3, CDKN2D, ILK, DDX20, PTPRK, RARG, EFNB2, NKX2-8, STK4, PDCD1LG2, PTHLH, VEGFC, TNS2, SERPINF1, RGCC, PDE5A, TGFB1I1, PRDM1, TNFAIP3, PMP22, EMP3, WNT5A, CAV2, CAV1, IFITM1, IFI30, TIMP2, SOX9, LIF, P3H2, P3H3, NDRG1, COL18A1, BMP4, PELI1, BMP2, KLF10, TGFBR1, TGFBR2, PTPN14, ITGA1, BRIP1, SMAD3, BRCA2, S…	1.5	6.7e-07
GO:0051338	regulation of transferase activity	171	7.3	MEF2C, STK38, ADCY7, PDGFA, IL18, BTRC, EDN1, CSPG4, TNFSF15, IQGAP3, PTPN22, TLR4, LPAR1, AURKB, TLR6, TGFB1, IQGAP1, TGFB2, MAP3K7, NLRC5, SHB, CD44, MDFIC, TIAM1, CDKN2D, ILK, SPRED2, PIK3CA, PDGFC, PDGFD, SPRED1, ADAM8, EGFR, PIK3CG, CEP85, IRS2, SOCS3, RBL1, PIM1, SOCS4, CD40, PKIA, IRS1, STK4, HHEX, SPAG9, PLCE1, RGCC, PDE5A, MST1R, LRRK2, TNFAIP3, MVP, WNT5A, SNX9, FGFR1, CAV1, DBNDD2, CDK…	1.4	7.4e-07
GO:1903829	positive regulation of cellular protein localization	79	3.4	PTGS2, IL18, XPO4, TLR2, PTPN22, TLR4, PMAIP1, GLI3, IQGAP1, TGFB1, GTSE1, TGFB2, TMEM173, DAB2, TRIM8, CASP8, NBPF3, CEP290, MSN, ASPH, TPR, NRG1, RHOG, EGFR, HSP90AA1, KIF5B, C2CD5, ZDHHC8, UGCG, ECT2, FLNA, STOM, HHAT, NPTN, CSF3, ABLIM3, GLIS2, PPP3R1, PML, SFN, ITGB1, TCF7L2, LIF, SEMA5A, EZR, HNMT, RAC2, SH3GLB1, PTN, MTCL1, TMEM30A, BMP4, IL6, TP53BP2, HCLS1, TGFBR1, SPHK1, YWHAB, SMAD3, I…	1.7	6.1e-07
GO:0071496	cellular response to external stimulus	61	2.6	PTGS2, FOXA2, PPARG, GJA1, TLR4, ANKRD1, IL15, PMAIP1, AQP1, TGFB1, KANK2, ATP2B1, ASGR1, AKR1C3, CASP8AP2, BAG3, CASP8, SLC2A1, DAP, FOSL1, EGFR, ICAM1, PTGER4, PIM1, IFI16, CD40, UCN2, NFE2L2, LRRK2, GADD45A, GSTP1, CAV1, SLC38A2, ADORA2B, ATG14, TNC, GSDMD, UPP1, HFE, SOX9, SH3GLB1, MAP3K1, PCSK9, PTN, CNN2, IL6, KLF10, PDK4, CBL, AXL, NR4A2, ITGA2, BRIP1, SNAI2, GAS6, CYBA, PDE2A, ITGA6, UCP2…	1.9	5.6e-07
GO:0042063	gliogenesis	58	2.5	ZNF488, FGF5, NOG, IL6ST, PPARG, SYNJ1, CSPG4, TLR2, TLR4, LPAR1, GLI3, TGFB1, TGFB2, SERPINE2, CXCR4, CLCF1, TIAM1, ILK, AFDN, NRG1, EGFR, EGR2, MED12, LEF1, CDK6, MMP14, HMGA2, ARHGEF10, PRDM8, NAB2, NAB1, MYRF, GSTP1, PARD3, CDK5R2, CSF1, VIM, SOX9, LIF, DNER, NKX2-1, PTN, PAFAH1B1, NDRG1, SH3TC2, LAMB1, ETV5, ERCC2, PLAG1, BMP2, ANXA1, NLGN3, NKX6-1, PTPN11, LAMA2, EPHA4, NOTCH1, AREG	1.9	5.7e-07
GO:0002237	response to molecule of bacterial origin	71	3	MEF2C, PTGS2, IL18, EDN1, TLR2, PTPN22, TLR4, ANKRD1, FER, TLR6, NOCT, TGFB1, EDNRB, CD96, TNFRSF11B, TRIM6, PDE4B, CASP8, SERPINE1, LOXL1, AKIRIN2, CHUK, ZFP36, IRAK2, PRKCA, ICAM1, PTGER4, LY96, PDE4D, CD40, NLRP3, PRKCE, JUNB, THBD, ADM, TNFRSF10D, IL12A, ADAM17, PRDM1, TNFAIP3, SSC5D, GSTP1, CSF3, WNT5A, TNFRSF6B, CXCL1, CSF2, TNFRSF25, CXCL3, CXCL2, NFKBIA, CXCL8, TIMP4, ABCA1, IRAK3, NR1D1,…	1.8	6.5e-07
GO:0032526	response to retinoic acid	33	1.4	MEF2C, WNT5A, MICB, WNT5B, TNC, IGFBP7, SYNJ1, PPARG, ABCA1, AQP1, SOX9, SETX, BRINP2, OSR1, PTK6, CDKN2D, CYP26B1, YAP1, TIE1, OGT, MUC1, LTK, SP100, RARG, ASXL1, TEAD2, FZD4, FZD7, DKK1, SERPINF1, DUSP1, ABL2, KLF4	2.5	4.2e-07
GO:0007409	axonogenesis	87	3.7	NRP2, NOG, S100A6, PLXNA2, ATL1, TRPV2, CRABP2, L1CAM, GLI3, VCL, TGFB2, NRCAM, BDNF, WDR36, PICALM, ROBO1, TIAM1, GATA3, SEMA7A, SEMA3E, ILK, SEMA3C, PAK1, SEMA3A, NRG1, GOLGA4, EGR2, ARHGEF1, KIF5B, EFNB2, NKX2-8, VASP, SLIT2, SEMA4F, SEMA4C, OPHN1, ANOS1, SEMA4B, SLITRK6, EXT1, SLITRK5, WNT5A, PARD3, PLXNC1, TNFRSF12A, BRSK1, CDH4, ITGB1, EPHB2, SEMA5A, PTK2, EZR, MACF1, SOS1, BCL11A, NKX2-1, …	1.7	7.2e-07
GO:0043068	positive regulation of programmed cell death	113	4.8	MEF2C, DLC1, PNMA2, PTGS2, MMP9, TNFSF15, OSGIN1, ANKRD1, TNFSF12, LPAR1, PMAIP1, TGFB1, TGFB2, TIAM2, CASP8AP2, TIAM1, CTGF, ROBO1, DDX20, DAP, ADAM8, RARG, BCL2A1, CD40, STK4, PLAUR, F3, RGCC, LRRK2, PNMA1, WNT5A, CAV1, MCL1, TNFRSF12A, STK17B, AKAP13, STK17A, ITGB1, SKIL, TRAF6, COL18A1, BMP4, CARD8, BMP2, TP53BP2, TGFBR1, ITGA1, TRIO, SMAD3, ATM, NMT1, NOTCH1, IFI27, ITGA6, PPARG, PAWR, LATS2…	1.6	8.5e-07
GO:0061035	regulation of cartilage development	24	1	WNT5A, BMP4, NOG, BMP2, RARG, TGFBR1, EFEMP1, SIX2, SMAD3, SNAI2, SOX9, GLI3, TGFB1, TGFB2, PTHLH, ADAMTS7, SHOX2, CTGF, LNPK, ADAMTS12, LOXL2, CARM1, RUNX2, CYR61	3	3.6e-07
GO:0071407	cellular response to organic cyclic compound	104	4.4	MEF2C, PTGS2, ZC3HAV1, BTRC, IL18, EDN1, ANKRD1, RORA, IL15, AQP1, TGFB1, KANK2, ATP2B1, GSTM2, DAB2, RAE1, PDE4B, CRY1, PIK3CG, EGFR, RBFOX2, RARG, ROCK2, PIM1, MED12, PDE4D, ARNTL, DDIT4, NPC1, SERPINF1, STC1, TGFB1I1, LRRK2, CAV1, BLM, GNAI1, NFKBIA, PAQR7, PAQR8, ABCA1, NR2C2, PAQR5, DYNAP, KLF5, BMP4, TAF1, BMP2, LGALS1, NR4A2, SMAD3, ITGA2, CYP7B1, ITGA6, NEDD4, FBXO32, KLF2, KLF4, NCOR2, C…	1.6	8.5e-07
GO:0052547	regulation of peptidase activity	84	3.6	CAST, DLC1, HMSD, LXN, MMP9, PPARG, TNFSF15, SPINK1, PMAIP1, AQP1, ACVR1C, NOD1, PICALM, CD44, SERPINE2, CASP8AP2, GSN, ROBO1, CTGF, SERPINA5, CDKN2D, CASP8, SERPINE1, SERPINA1, DAP, ASPH, PI16, MKL1, TFPI2, AKIRIN2, CYR61, WFDC10B, BST2, LEF1, CST1, IFI16, NLRP3, MMP14, NLRP1, TANK, PCOLCE2, PLAUR, PPM1F, SERPINF1, ANXA8L1, F3, SERPINB8, RIPK1, CST4, ANOS1, SERPINB1, PROS1, WFDC2, WFDC3, CAV1, S…	1.7	8.3e-07
GO:0043065	positive regulation of apoptotic process	112	4.8	MEF2C, DLC1, PNMA2, PTGS2, MMP9, TNFSF15, OSGIN1, ANKRD1, TNFSF12, LPAR1, PMAIP1, TGFB1, TGFB2, TIAM2, CASP8AP2, TIAM1, CTGF, ROBO1, DDX20, DAP, ADAM8, RARG, BCL2A1, CD40, STK4, PLAUR, F3, RGCC, PNMA1, WNT5A, CAV1, MCL1, TNFRSF12A, STK17B, AKAP13, STK17A, ITGB1, SKIL, TRAF6, COL18A1, BMP4, CARD8, BMP2, TP53BP2, TGFBR1, ITGA1, TRIO, SMAD3, ATM, NMT1, NOTCH1, IFI27, ITGA6, PPARG, PAWR, LATS2, ACVR1…	1.6	9.6e-07
GO:0030336	negative regulation of cell migration	53	2.3	DLC1, NOG, TGFB1, VCL, ACVR1C, NOV, ROBO1, SERPINE1, ILK, RABGEF1, TIE1, SEMA3A, NRG1, PLCB1, GPR173, RAP2A, PTPRK, SP100, PTGER4, BST2, PTPRG, SLIT2, SERPINF1, KRT16, TACSTD2, CLIC4, RGCC, MCC, STC1, NFE2L2, SRGAP1, GSTP1, IFITM1, C5, ZMYND8, CCL28, TIMP1, STARD13, NKX2-1, PTN, CNN2, THBS1, ARHGDIB, DACH1, CORO1C, NOTCH1, LRP1, TCAF1, ARAP3, PHLDB2, ENG, IGFBP3, KLF4	2	7.7e-07
GO:0007163	establishment or maintenance of cell polarity	45	1.9	WNT5A, PARD3, SDCCAG8, FERMT1, BRSK1, AQP1, AMOTL1, ACTR2, SPRY2, DOCK2, PTK2, SPRY1, EZR, ANK1, GSN, GATA3, FAT1, CYP26B1, ILK, DLG4, PAFAH1B1, MTCL1, CAP1, MSN, RAP2A, ARHGEF2, CAP2, ROCK1, CKAP5, ROCK2, MAP1B, ERBIN, LMNA, SIPA1L3, NCKAP1L, LIN7C, SPDL1, RICTOR, MYH9, SYNE2, CLIC4, FRMD4A, KIF20B, DST, PARVA	2.1	7.2e-07
GO:0032386	regulation of intracellular transport	96	4.1	CREBRF, XPO1, PTGS2, XPO5, IL18, XPO4, TLR2, PTPN22, RANGAP1, TLR4, FER, GLI3, TGFB1, GTSE1, NOV, TMEM173, DAB2, GAB2, MDFIC, IL4R, NBPF3, RABGEF1, RAB23, CEP290, MSN, ASPH, TPR, NRG1, MX2, EGFR, SP100, HSP90AA1, BST2, KIF5B, C2CD5, ZDHHC8, UGCG, NLRP3, ECT2, PKIA, FLNA, STOM, UNC13D, GNAQ, HHAT, LRRK2, CSF3, APC2, ADORA2B, NFKBIE, ABLIM3, PPP3R1, NFKBIA, SFN, TCF7L2, SEMA5A, EZR, HNMT, RAC2, SH3…	1.6	1e-06
GO:0045087	innate immune response	152	6.5	PVR, MICB, ZC3HAV1, BTRC, EDN1, TLR2, PTPN22, TLR4, TLR6, TGFB1, APOBEC3C, ISG20, APOBEC3D, CFP, MAP3K7, NLRC5, CD44, ISG15, GATA3, CFH, ADAM8, MX2, AKIRIN2, COCH, PIK3CG, GBP5, NCF2, BST2, SOCS3, RELB, HLA-A, HLA-B, HLA-E, TANK, UNC13D, KRT16, MST1R, PRDM1, TNFAIP3, SSC5D, GBP2, GBP1, WNT5A, IFIH1, CAV1, IFITM1, IFITM2, IFITM3, GSDMD, OAS3, NFKBIA, IFI30, HSPA1A, OAS1, ITGB2, OAS2, IRAK3, PTK2, …	1.4	1.3e-06
GO:0022407	regulation of cell-cell adhesion	82	3.5	PPARA, FOXA2, IL6ST, IL18, FERMT3, FSTL3, PTPN22, IL15, ZEB1, PAWR, SDC4, GLI3, TGFB1, MAP3K7, SHB, HSPH1, CD44, SERPINE2, GSN, GATA3, IL4R, HLX, PIK3CA, PAK1, ADAM8, FANCA, CEACAM1, EBI3, AP3B1, PRKCA, EFNB2, HLA-A, LEF1, NLRP3, HLA-E, MYADM, PDCD1LG2, CARD11, CD83, CAMK4, PDE5A, RGCC, IL12A, HAS2, PRDM1, PRNP, WNT5A, CAV1, GCNT2, HFE, IL7R, CCL28, PTK2, RAC2, UBASH3B, SOS1, CYP26B1, TRAF6, BMP4…	1.7	1.1e-06
GO:0003382	epithelial cell morphogenesis	20	0.9	BMP4, COL18A1, ROCK1, MET, SIX2, SIPA1L3, BASP1, STAT1, FLNB, FZD7, LIF, FRMD6, VSIG1, CLIC4, ID1, GATA3, PLOD3, PAX8, HEG1, STC1	3.3	4.6e-07
GO:2000146	negative regulation of cell motility	55	2.3	DLC1, NOG, TGFB1, VCL, ACVR1C, NOV, ROBO1, GATA3, SERPINE1, ILK, RABGEF1, TIE1, SEMA3A, NRG1, PLCB1, GPR173, RAP2A, PTPRK, SP100, PTGER4, BST2, PTPRG, SLIT2, SERPINF1, KRT16, TACSTD2, CLIC4, RGCC, MCC, STC1, NFE2L2, SRGAP1, GSTP1, IFITM1, SPOCK3, C5, ZMYND8, CCL28, STARD13, TIMP1, NKX2-1, PTN, CNN2, THBS1, ARHGDIB, DACH1, CORO1C, NOTCH1, LRP1, TCAF1, ARAP3, PHLDB2, ENG, IGFBP3, KLF4	1.9	1e-06
GO:0002694	regulation of leukocyte activation	95	4.1	MEF2C, IL27RA, APLF, IL6ST, IL18, PTPN22, TLR4, IL15, FER, PAWR, ZEB1, RORA, SDC4, GLI3, TGFB1, FLT3LG, IL31RA, MAP3K7, HSPH1, SHB, GAB2, CLCF1, GSN, GATA3, HLX, IL4R, RABGEF1, IL15RA, PIK3CA, PAK1, ADAM8, FANCA, CEACAM1, EBI3, AP3B1, IRS2, BST1, EFNB2, HLA-A, CD40, NLRP3, HLA-E, MMP14, AHR, PDCD1LG2, INHBA, CD83, CARD11, UNC13D, CAMK4, PDE5A, IL12A, PRDM1, TNFAIP3, PRNP, WNT5A, CAV1, ADORA2B, SL…	1.6	1.3e-06
GO:0010718	positive regulation of epithelial to mesenchymal transition	17	0.7	BMP2, GCNT2, TGFBR1, TGFBR2, SMAD3, LEF1, WWTR1, TCF7L2, TGFB1, TGFB2, NOTCH1, DAB2, RGCC, BCL9L, TGFB1I1, ENG, ACVR1	3.7	3.8e-07
GO:0002040	sprouting angiogenesis	25	1.1	BMP4, PTGS2, E2F7, EFNB2, LEF1, ESM1, ITGB1, EPHA2, SLIT2, STARD13, SEMA5A, NOTCH1, SRPX2, ITGA5, ROBO1, SEMA3E, CCBE1, JAK1, HDAC9, LOXL2, FGF1, THBS1, ENG, KLF4, PARVA	2.8	6e-07
GO:0033627	cell adhesion mediated by integrin	19	0.8	MUC1, ICAM1, SWAP70, PODXL, FERMT3, FBN1, NCKAP1L, ITGA2, ITGB3, SNAI2, ITGB1, TGFB2, PTPN11, NOV, ITGA6, ITGA5, ITGAV, SERPINE1, ADAM17	3.4	4.6e-07
GO:2001236	regulation of extrinsic apoptotic signaling pathway	43	1.8	TRAF1, CSF2, FGFR1, CAV1, MCL1, TNFRSF12A, PML, HSPA1A, PMAIP1, TNFSF12, TCF7L2, TGFB2, PHIP, SRPX, ITGAV, CASP8, SERPINE1, YAP1, SKIL, NRG1, THBS1, AGAP2, ACSL5, SCG2, BMP4, ICAM1, ARHGEF2, TMC8, SP100, LGALS3, TGFBR1, LMNA, SNAI2, STK4, EYA4, INHBA, ITGA6, FYN, RIPK1, G0S2, TNFAIP3, GSTP1, ACVR1	2.1	9.8e-07
GO:1904035	regulation of epithelial cell apoptotic process	24	1	ZFP36, COL18A1, CAST, ICAM1, IL6, CD40, TCF7L2, NDNF, GAS6, IL11, SEMA5A, AKR1C3, ZFP36L1, GSN, GATA3, SERPINE1, RGCC, SORT1, NFE2L2, THBS1, TNFAIP3, ANO6, ANGPTL4, SCG2	2.9	6.9e-07
GO:0031400	negative regulation of protein modification process	112	4.8	NOG, STK38, ZNF451, PTPN22, TLR4, TGFB1, SHB, ISG15, CDKN2D, ILK, SPRED2, RABGEF1, OGT, RNF149, SPRED1, CRY1, PID1, CEP85, ROCK1, SOCS3, ROCK2, CRTAP, HMG20A, SOCS4, PDE4D, MECOM, PKIA, DDIT4, HHEX, TNFAIP3, LRRK2, GBP1, MVP, CAV1, DBNDD2, HFE, HSPA1A, LIF, DUSP18, IRAK3, UBASH3B, HEXIM1, PTK6, FBXO43, BMP4, TAF1, NCKAP1L, PIBF1, CDC27, PSMB8, PSMB9, CORO1C, RGS4, DNMT1, ENG, KLF4, SPINK1, LATS2,…	1.5	1.6e-06
GO:0045860	positive regulation of protein kinase activity	95	4.1	MEF2C, CLSPN, ADCY7, PDGFA, IL18, EDN1, CSPG4, IQGAP3, TNFSF15, TLR4, LPAR1, SDC4, TLR6, TGFB1, IQGAP1, TGFB2, MAP3K7, SPRY2, HSPH1, NOD1, CXCR4, SAA1, MDFIC, TIAM1, ILK, PIK3CA, PDGFC, PAK1, PDGFD, ADAM8, FGF1, NRG1, CYR61, KIF14, EGFR, PIK3CG, IRAK2, CCDC88A, PIM1, TPX2, CD40, STK4, ECT2, CARD10, SPAG9, ACVR2B, PLCE1, CRKL, EREG, CCND2, RIPK1, RGCC, PDE5A, ADAM17, MST1R, LRRK2, GADD45B, GADD45A…	1.6	1.6e-06
GO:0061564	axon development	91	3.9	NRP2, NOG, S100A6, PLXNA2, ATL1, TRPV2, CRABP2, L1CAM, GLI3, VCL, TGFB2, NRCAM, BDNF, WDR36, PICALM, ROBO1, TIAM1, GATA3, SEMA7A, SEMA3E, ILK, SEMA3C, PAK1, SEMA3A, NRG1, GOLGA4, EGR2, ARHGEF1, KIF5B, EFNB2, NKX2-8, VASP, SLIT2, SEMA4F, SEMA4C, OPHN1, ANOS1, SEMA4B, SLITRK6, EXT1, SLITRK5, WNT5A, PARD3, PLXNC1, TNFRSF12A, TNC, BRSK1, CDH4, ITGB1, SCARF1, EPHB2, SEMA5A, PTK2, EZR, MACF1, SOS1, BCL…	1.6	1.6e-06
GO:0000122	negative regulation of transcription from RNA polymerase II promoter	138	5.9	MEF2C, XPO1, MEF2A, NOG, FST, EDN1, ZNF451, ANKRD1, AURKB, TGFB1, KANK2, GATA3, DDX20, CRY1, AKIRIN2, SATB1, SATB2, RARG, RCOR1, RELB, RBL1, HMG20A, HES7, DCAF1, PKIA, JUNB, HHEX, UHRF1, SIX1, PRDM5, PRDM1, NFE2L3, FGFR1, CAV1, SOX9, TAGLN3, MEIS2, TCERG1, NIPBL, HEXIM1, NKX2-1, SKIL, BHLHE40, TRAF6, NKX2-5, KLF5, BMP4, BMP2, TAF3, KLF12, KLF10, ASXL1, NR4A2, LMCD1, SMAD3, SMYD2, NKX6-1, FOXP2, S…	1.5	1.8e-06
GO:1901698	response to nitrogen compound	160	6.8	MEF2C, LYPD1, GNA15, ZC3HAV1, PTGS2, ADCY7, EDN1, TLR2, PTPN22, RANGAP1, PMAIP1, AQP1, TGFB1, IQGAP1, GSTM1, GSTM2, TIAM1, CTGF, PDE4B, PIK3CA, PDGFC, DDX21, ASPH, OGT, PDGFD, CRY1, EGFR, PIK3CG, PID1, RNLS, IRS2, SOCS3, C2CD5, UBR2, ACTN2, PDE4D, IRS1, JUNB, HHEX, THBD, STC1, LRRK2, TNFAIP3, CAV2, CAV1, BLM, GNAI2, GNAI1, NFKBIA, TIMP4, SOX9, TIMP1, IRAK3, PTK2, HNMT, AGRN, KLF5, TAF1, PELI1, KL…	1.4	1.9e-06
GO:0048732	gland development	87	3.7	NOG, PDGFA, BTRC, E2F7, FSTL3, IQGAP3, AURKA, GLI3, TGFB1, TGFB2, ARHGAP5, SERPINE2, ROBO1, GATA3, HLX, PAX8, SEMA3C, PIK3CA, SEMA3A, MSN, NRG1, AGAP2, CEACAM1, EGFR, IRS2, RARG, NKX2-8, LEF1, SIX4, HMGA2, HHEX, MAN2A1, CRKL, SERPINF1, HOXD3, SIX1, FOXC1, TNFAIP3, WNT5A, PAM, FGFR1, CAV1, LIMS2, TNC, CSF1, PML, HK2, HFE, NFKBIA, SOX9, STAT6, SLC29A1, EZR, TGM2, PCSK9, NKX2-1, PTN, PLXND1, NKX2-5,…	1.6	1.6e-06
GO:0090287	regulation of cellular response to growth factor stimulus	56	2.4	NOG, LTBP1, LTBP4, ZNF451, FAM20C, FSTL3, ZEB1, TGFB1, SPRY2, DAB2, SPRY1, HTRA1, GATA3, CHST11, CCBE1, ILK, HTRA3, FGF1, CYR61, SLIT2, VEGFC, HHEX, CHRDL1, NPTN, ADAM17, TGFB1I1, WNT5A, FGFR1, CAV2, CAV1, HSPA1A, ITGB3, PEG10, NKX2-1, BCL9L, ADAMTS12, SKIL, THBS1, RUNX2, MYOF, BMP4, TGFBR1, FBN1, TGFBR2, SMAD3, ITGA3, FZD4, DKK3, NOTCH1, DKK1, NEDD4, ITGA5, SMURF2, SMURF1, ENG, DUSP6	1.9	1.4e-06
GO:0030516	regulation of axon extension	29	1.2	WNT5A, PLXNC1, PLXNA2, TNFRSF12A, TRPV2, L1CAM, CDH4, SEMA5A, NRCAM, WDR36, MACF1, SEMA7A, BCL11A, ILK, SEMA3E, SEMA3C, PAFAH1B1, SEMA3A, PLXND1, NRG1, GOLGA4, FN1, MAP1B, DPYSL2, NKX6-1, SEMA6B, SEMA4F, SEMA4C, SEMA4B	2.6	9.4e-07
GO:0007417	central nervous system development	161	6.9	DLC1, MEF2C, SYT1, NOG, PLXNA2, IL6ST, TLR2, TLR4, RORA, LPAR1, AQP1, TGFB1, ATP2B1, NRCAM, S1PR1, SERPINE2, ROBO1, SEMA7A, CEP290, PDGFC, AFDN, ASPM, EGFR, RBFOX2, SATB2, IRS2, PTPRG, BCL2A1, MED12, LIG4, BASP1, STK4, DDIT4, PRDM8, HHEX, NAV2, SIX1, EXT1, LRRK2, SMARCA1, SLITRK5, WNT5A, PAM, FGFR1, C11ORF63, SLC38A2, CDK5R2, PFKFB3, TIMP4, SOX9, TIMP2, ITGB1, TAGLN3, NR2C2, EPHB2, SEMA5A, LIF, P…	1.4	2.2e-06
GO:0035329	hippo signaling	16	0.7	MOB1A, YWHAB, WWC2, TEAD1, TEAD2, WTIP, WWTR1, AMOTL1, AMOTL2, STK4, LATS2, AJUBA, PJA2, FAT4, YAP1, TJP2	3.8	5.4e-07
GO:0044089	positive regulation of cellular component biogenesis	90	3.8	RAB3GAP2, EDN1, TLR4, FER, LPAR1, PMAIP1, SDC4, TLR6, MMP1, IQGAP1, TGFB1, SETX, ACTR2, BDNF, GSN, CTGF, IL1RAP, PAK1, MSN, TPR, FOSL1, PRKCA, ICAM1, GBP5, HSP90AA1, ROCK1, TRABD2A, DDB1, PRKCE, DCTN1, VASP, ARHGEF10, PPM1F, FMN1, AMIGO2, RGCC, CLIP1, PDCD6IP, SLITRK6, SLITRK5, CSF3, SNX9, CSF2, CAV1, CEP120, SLF2, ABI2, SOX9, ZMYND8, EPHB2, CCL26, CCL24, CDC42EP2, CDC42EP1, RAC2, SH3GLB1, AGRN, …	1.6	1.9e-06
GO:0010942	positive regulation of cell death	116	5	MEF2C, DLC1, PNMA2, PTGS2, MMP9, TNFSF15, OSGIN1, ANKRD1, TNFSF12, LPAR1, PMAIP1, TGFB1, TGFB2, PICALM, TIAM2, CASP8AP2, TIAM1, CTGF, ROBO1, DDX20, DAP, ADAM8, RARG, BCL2A1, CD40, STK4, DDIT4, PLAUR, F3, RGCC, LRRK2, PNMA1, WNT5A, CAV1, MCL1, TNFRSF12A, STK17B, AKAP13, STK17A, ITGB1, SKIL, TRAF6, COL18A1, BMP4, CARD8, BMP2, TP53BP2, TGFBR1, ITGA1, TRIO, SMAD3, ATM, NMT1, NOTCH1, IFI27, ITGA6, UCP…	1.5	2.2e-06
GO:0031401	positive regulation of protein modification process	196	8.4	DLC1, MEF2C, RAB3GAP2, ADCY7, IL6ST, EDN1, PTPN22, LPAR1, MAP3K7, CD44, CTGF, SEMA7A, ILK, PIK3CA, PELI2, OGT, ADAM8, PIK3CG, ROCK2, TRABD2A, PIM1, CD40, TANK, PLAUR, VEGFC, SPAG9, RGCC, NPTN, MST1R, TNFRSF6B, GCNT2, CDK5R2, GNAI2, HFE, AKAP13, AFAP1L2, LIF, DYNAP, BMP4, BMP2, PELI1, TGFBR1, SPHK1, TGFBR2, NCKAP1L, PIBF1, CDC27, GAS6, ATM, PTPN11, EPHA4, SMURF1, ENG, CLSPN, FLT3LG, HSPH1, KISS1, …	1.4	2.4e-06
GO:0070486	leukocyte aggregation	92	3.9	MICB, ELF4, IL6ST, IL18, LEPR, PTPN22, IL15, ZEB1, RORA, PAWR, SDC4, GLI3, TGFB1, MAP3K7, HSPH1, SHB, CD44, GSN, GATA3, HLX, IL4R, CASP8, PIK3CA, PAK1, ADAM8, FANCA, CEACAM1, EBI3, AP3B1, EGR1, PIK3CG, ICAM1, SATB1, PTGER4, EFNB2, RELB, HLA-A, LEF1, CDK6, LIG4, NLRP3, HLA-E, MYH9, PDCD1LG2, CD83, CARD11, CAMK4, PDE5A, IL12A, ADAM17, HAS2, PRDM1, PRNP, CAV1, STK10, HFE, IL7R, APBB1IP, STAT6, ZFP36…	1.6	2e-06
GO:1903034	regulation of response to wounding	40	1.7	CAV1, FOXA2, PDGFA, TNFRSF12A, EDN1, GJA1, TLR4, FAM46A, SCARF1, SERPINE2, HPSE, GSN, UBASH3B, SERPINE1, INPP5F, SOX15, THBS1, ANO6, CEACAM1, PRKCA, PLAT, STX2, TGFBR2, ANXA1, SMAD3, PRKCE, ANXA2, PLAUR, EPHA4, THBD, F3, TBXA2R, HBEGF, NFE2L2, TNFAIP3, PROS1, PHLDB2, PLAU, KLF4, MYLK	2.2	1.4e-06
GO:0051301	cell division	111	4.7	KIFC1, PRC1, PDGFA, AURKA, AURKB, TGFB1, TGFB2, HMCN1, RAD21, INCENP, PDGFC, PDGFD, CCNA1, ASPM, CDCA4, STAG1, ROCK2, LIG1, ESPL1, LIG4, MYH9, VEGFC, SGO2, SGO1, PDCD6IP, SNX9, FGFR1, KIF4A, GNAI2, BLM, GNAI1, DIAPH2, AHCTF1, CEP164, ANLN, CNTRL, WAPL, HELLS, ERCC6L, PRPF40A, CKAP5, BRCA2, SPDL1, MISP, CDC27, CSPP1, NOTCH1, PLK3, SPTBN1, KIF23, FGF5, E2F7, BORA, MITD1, LATS2, ACTR2, MASTL, TPR, F…	1.5	2.2e-06
GO:0018193	peptidyl-amino acid modification	202	8.6	XRCC4, IL6ST, RANGAP1, AURKA, CLK1, AURKB, MAP3K7, EPC2, CD44, BRPF3, RAE1, INCENP, ILK, PIK3CA, OGT, STAG1, CRTAP, HMG20A, NAA25, CD40, MECOM, DCAF1, NKTR, VEGFC, CAMK4, PRDM5, NPTN, MST1R, AFAP1L2, CNTRL, EPHB2, LIF, P3H2, P3H3, NUP50, TGFBR1, SPHK1, TGFBR2, PIBF1, SMYD2, OXSR1, GAS6, EPHA2, ATM, EPHA4, UBA2, KAT6B, FGF5, CLSPN, SPINK1, LATS2, ST6GALNAC5, HSPH1, P4HA2, MASTL, FGF1, TOP2A, ERRFI…	1.4	2.6e-06
GO:0048568	embryonic organ development	86	3.7	MEF2C, NOG, PDGFA, MYO7A, E2F7, EDN1, TBX20, GJA1, ZEB1, GLI3, TGFB1, MTHFD1L, FLT3LG, TGFB2, SPRY2, OSR1, GATA3, HLX, PAX8, CASP8, FOXF2, CHST11, CEP290, YAP1, CYR61, EGFR, SATB2, RARG, SOCS3, MICAL2, MED12, LEF1, SIX2, SIX4, MMP14, STK4, JUNB, WDR48, MIB1, HHEX, ADM, HOXD3, SIX1, HOXD4, FOXC1, MFAP2, PRDM1, SLITRK6, ACVR1, WNT5A, FGFR1, CSF2, KMT2A, CXCL8, SOX9, EPHB2, LIF, ZFP36L1, NIPBL, PLCD…	1.6	2.1e-06
GO:0070727	cellular macromolecule localization	263	11.2	RAB3GAP2, LYPD1, PTGS2, LTBP2, PTPN22, RANGAP1, AURKA, AURKB, NOV, BDNF, VPS13C, RAE1, RAB23, CEP290, PTPRK, TTC7A, ROCK1, KIF5B, ROCK2, UGCG, OPTN, NPC1, SPAG4, NPTN, TBC1D8B, NFKBIE, AKAP12, NFKBIA, HFE, RIMS2, SEMA5A, LIF, TRAM2, RAC2, HNMT, MACF1, NUP50, EFR3A, OBSL1, AGRN, STX11, FCHO2, BMP4, TP53BP2, TGFBR1, SPHK1, PTPN14, SMAD3, S100A10, PIBF1, SPDL1, CELSR1, ATM, EPHA2, GAS6, PTPN11, CCT7…	1.3	2.8e-06
GO:0045444	fat cell differentiation	49	2.1	WNT5A, ZNF516, WNT5B, PTGS2, LRRC8C, NOC3L, PPARG, RORA, TCF7L2, TRIB2, NOCT, TGFB1, IL11, ZFP36L1, ZFP36L2, LAMB3, NIPBL, ERO1A, GATA3, PLCB1, ASXL2, KLF5, ZFP36, PID1, IL6, BMP2, EGR2, CEBPB, ASXL1, NR4A2, ALMS1, SMAD3, BBS12, ARNTL, HMGA2, WWTR1, SNAI2, STK4, PSMB8, PLAC8, SOD2, ITGA6, MAPK14, SORT1, METRNL, GRK5, CARM1, KLF4, ARL4A	2	1.7e-06
GO:0007229	axon extension	32	1.4	LIMS2, FUT8, FERMT3, FERMT2, ITGB4, ITGA10, ITGB2, ITGB3, ITGB1, ITGBL1, PTK2, DAB2, ITGB8, CTGF, SEMA7A, ITGAV, ILK, ZYX, ADAM8, CEACAM1, ERBIN, ITGA1, ITGA2, ITGA3, MYH9, FLNA, PTPN11, ITGA6, ITGA5, LAMA5, ADAM12, DST	2.4	1.3e-06
GO:0048675	integrin-mediated signaling pathway	32	1.4	WNT5A, CAV2, NOG, CAV1, LTBP1, TBX20, FST, ZNF451, FSTL3, HSPA1A, TGFB1, NOV, PEG10, HTRA1, CHST11, NKX2-1, BCL9L, HTRA3, SKIL, TGFBR1, TGFBR2, FBN1, SMAD3, NOTCH1, CHRDL1, DKK1, ADAM17, SMURF2, TGFB1I1, SMURF1, ENG, ACVR1	2.4	1.3e-06
GO:0090101	negative regulation of transmembrane receptor protein serine/threonine kinase signaling pathway	32	1.4	WNT5A, NRP2, PLXNC1, PLXNA2, TNFRSF12A, TRPV2, L1CAM, ITGB1, CDH4, VCL, SEMA5A, MACF1, SEMA7A, BCL11A, SEMA3E, ILK, SEMA3C, PAFAH1B1, SEMA3A, PLXND1, NRG1, GOLGA4, DCLK1, FN1, MAP1B, NLGN3, RAPH1, SLIT2, SEMA6B, SEMA4F, SEMA4C, SEMA4B	2.4	1.3e-06
GO:0001101	response to acid chemical	63	2.7	MEF2C, MICB, PTGS2, LDLR, IGFBP7, PPARG, EDN1, SYNJ1, TLR2, ZEB1, AQP1, SETX, AKR1C3, BRINP2, OSR1, CTGF, CDKN2D, PDGFC, YAP1, TIE1, OGT, PDGFD, CHUK, PID1, EGFR, ICAM1, SP100, RARG, UBR2, SERPINF1, GSTP1, WNT5A, WNT5B, TNC, ABCA1, SOX9, PTK6, CYP26B1, PTN, MUC1, COL18A1, GLRB, IL6, COL4A1, LTK, CEBPB, ASXL1, PDK4, ITGA2, TEAD2, CAPN2, FZD4, FZD7, SOD2, CYBA, DKK1, DUSP1, UCP2, AKR1B1, DNMT1, ABC…	1.8	2e-06
GO:0090288	negative regulation of cellular response to growth factor stimulus	36	1.5	WNT5A, CAV2, CAV1, NOG, LTBP1, ZNF451, FSTL3, HSPA1A, TGFB1, SPRY2, SPRY1, PEG10, HTRA1, GATA3, CHST11, NKX2-1, BCL9L, HTRA3, SKIL, ADAMTS12, THBS1, TGFBR1, TGFBR2, FBN1, SMAD3, SLIT2, HHEX, NOTCH1, CHRDL1, DKK1, NEDD4, ADAM17, SMURF2, TGFB1I1, SMURF1, ENG	2.2	1.6e-06
GO:0007179	transforming growth factor beta receptor signaling pathway	42	1.8	CAV2, CAV1, PARD3, LTBP1, GCNT2, LTBP2, FUT8, ZNF451, FERMT2, PML, HSPA1A, ITGB1, TGFB1, TGFB2, MAP3K7, PTK2, DAB2, PEG10, HTRA1, CHST11, NKX2-1, BCL9L, ZYX, HTRA3, SKIL, THBS1, PTPRK, ARHGEF18, TGFBR1, KLF10, TGFBR2, FBN1, CBL, SMAD3, FURIN, ID1, ADAM17, SMURF2, SMURF1, TGFB1I1, ENG, ACVR1	2.1	1.8e-06
GO:0008064	regulation of actin polymerization or depolymerization	44	1.9	CSF3, LIMA1, ARHGAP18, ABI2, FER, CCL26, SEMA5A, CCL24, ACTR2, CDC42EP2, CDC42EP1, GSN, TMSB15B, WIPF1, CDC42EP3, RASA1, ICAM1, SWAP70, HCLS1, NCKAP1L, TMSB10, ACTN2, RICTOR, PRKCE, MYADM, SLIT2, VASP, NCKAP1, FMN1, CORO1A, EPS8, PLEKHH2, GMFG, CFL2, CAPG, FHOD3, FCHSD2, TMOD3, SPTBN1, TMSB4X, FCHSD1, SH3BGRL3, CIT, SPTAN1	2.1	1.8e-06
GO:0002683	negative regulation of immune system process	81	3.5	MICB, IL27RA, PPARG, FSTL3, PTPN22, TLR4, FER, PAWR, SDC4, GLI3, TGFB1, TGFB2, IL31RA, NOV, NLRC5, CD96, HTRA1, HLX, IL4R, RABGEF1, PLCB1, CEACAM1, ZFP36, BST2, PTGER4, LY96, HLA-A, CDK6, HLA-B, IFI16, HLA-E, PDCD1LG2, SLIT2, INHBA, PDE5A, PRDM1, NFE2L2, GPR17, TNFAIP3, PRNP, GBP1, NMI, C5, HFE, NFKBIA, SOX9, IL7R, CCL28, SEC14L1, STAT6, ZFP36L1, PLCL2, IRAK3, LPXN, EZR, MEIS2, NR1D1, UBASH3B, RU…	1.7	2.5e-06
GO:0043903	regulation of symbiosis, encompassing mutualism through parasitism	64	2.7	MICB, RSF1, ZC3HAV1, PTPN22, IL15, APOBEC3C, ISG20, APOBEC3D, TMEM173, AP1S2, ISG15, TRIM8, MDFIC, GSN, HTRA1, TRIM6, DDX60, TOP2A, TNIP1, ZFP36, SP100, BST2, DDB1, HLA-A, HERC5, PKN2, LEF1, IFI16, HMGA2, SRPK1, STOM, MB21D1, TNFAIP3, CAV2, CAV1, AP1M1, IFITM1, IFITM2, IFITM3, PML, OAS3, CXCL8, OAS1, SEC14L1, POLR2A, DOCK2, TAP2, ITGAV, CHD1, PTX3, EXOC2, DHX58, LGALS1, STAT1, FUCA2, BIRC3, DDX58…	1.8	2.3e-06
GO:0071900	regulation of protein serine/threonine kinase activity	95	4.1	MEF2C, STK38, PDGFA, EDN1, CSPG4, IQGAP3, TNFSF15, PTPN22, TLR4, LPAR1, TLR6, IQGAP1, TGFB1, LATS2, SPRY4, MAP3K7, SPRY2, SPRY1, NOD1, CXCR4, SAA1, MDFIC, TIAM1, CDKN2D, ILK, SPRED2, PDGFC, SPRED1, PAK1, PDGFD, ADAM8, FGF1, NRG1, SERTAD1, EGFR, PIK3CG, IRAK2, PIM1, HERC5, CD40, UBE2C, STK4, PKIA, CARD10, HHEX, SPAG9, PLCE1, CRKL, CCND2, RIPK1, RGCC, PDE5A, ADAM17, MST1R, TNFAIP3, LRRK2, GADD45B, …	1.6	2.8e-06
GO:0010595	positive regulation of endothelial cell migration	24	1	NRP2, PRKCA, WNT5A, BMP4, FGFR1, PTGS2, ROCK2, MET, EDN1, ITGB3, AMOTL1, TGFB1, ANXA3, SEMA5A, VEGFC, SRPX2, ETS1, GATA3, MAPK14, CCBE1, NFE2L2, THBS1, FGF1, HDAC9	2.8	1.3e-06
GO:0045598	regulation of fat cell differentiation	33	1.4	WNT5A, WNT5B, PTGS2, PPARG, DLK2, RORA, TRIB2, TGFB1, NOCT, ZFP36L1, ZFP36L2, NR1D1, GATA3, ASXL2, ZFP36, KLF5, IL6, BMP2, CEBPB, ASXL1, ALMS1, SMAD3, ARNTL, BBS12, WWTR1, SNAI2, STK4, SOD2, MAPK14, MEX3C, SORT1, METRNL, CARM1	2.3	1.7e-06
GO:0050792	regulation of viral process	60	2.6	MICB, RSF1, ZC3HAV1, PTPN22, IL15, APOBEC3C, ISG20, APOBEC3D, TMEM173, AP1S2, ISG15, TRIM8, MDFIC, GSN, HTRA1, TRIM6, DDX60, TOP2A, TNIP1, ZFP36, SP100, BST2, DDB1, HLA-A, PKN2, HERC5, LEF1, IFI16, HMGA2, SRPK1, STOM, MB21D1, TNFAIP3, CAV2, AP1M1, IFITM1, IFITM2, IFITM3, PML, OAS3, CXCL8, OAS1, SEC14L1, POLR2A, DOCK2, TAP2, CHD1, PTX3, DHX58, LGALS1, STAT1, BIRC3, DDX58, PLSCR1, NOTCH1, IFIT1, OA…	1.8	2.4e-06
GO:0044236	multicellular organism metabolic process	37	1.6	MMP9, TIPARP, PPARG, ITGB1, SERPINH1, MMP1, TGFB1, P3H2, AKR1C3, TRAM2, P3H3, COL7A1, CTGF, COL6A3, COL6A2, COL12A1, CREB3L1, COL8A1, ERRFI1, BMP4, COL18A1, IL6, COL4A2, TNXB, COL4A1, COL13A1, MRC2, MMP19, ITGA2, CTSS, MMP14, FURIN, COL5A1, TNS2, ID1, RGCC, ENG	2.2	1.9e-06
GO:0030832	regulation of actin filament length	44	1.9	CSF3, LIMA1, ARHGAP18, ABI2, FER, CCL26, SEMA5A, CCL24, ACTR2, CDC42EP2, CDC42EP1, GSN, TMSB15B, WIPF1, CDC42EP3, RASA1, ICAM1, SWAP70, HCLS1, NCKAP1L, TMSB10, ACTN2, RICTOR, PRKCE, MYADM, SLIT2, VASP, NCKAP1, FMN1, CORO1A, EPS8, PLEKHH2, GMFG, CFL2, CAPG, FHOD3, FCHSD2, TMOD3, SPTBN1, TMSB4X, FCHSD1, SH3BGRL3, CIT, SPTAN1	2	2.2e-06
GO:0051058	negative regulation of small GTPase mediated signal transduction	18	0.8	STAMBP, DLC1, STMN3, FBP1, ITGA3, TIMP2, ITGB1, SLIT2, TGFB2, RASAL2, SPRY2, SPRY1, ARHGAP42, RABGEF1, ARAP3, RASA3, RASA1, RASA2	3.4	1e-06
GO:0050730	regulation of peptidyl-tyrosine phosphorylation	52	2.2	CSF3, CSF2, CAV1, PDGFA, IL6ST, IL18, CSPG4, SPINK1, ITGB2, AFAP1L2, IL15, ITGB3, GPRC5A, IQGAP1, TGFB1, IL11, IL31RA, LIF, HSPH1, CD44, CLCF1, PTK6, INPP5F, PDGFC, PDGFD, NRG1, ERRFI1, EHD4, EGFR, ICAM1, ARHGEF2, IL6, SOCS3, HCLS1, CBL, SOCS4, PIBF1, RICTOR, CD40, PRKCE, GAS6, SH3BP5, VEGFC, EREG, FYN, ITGA5, ZFYVE28, IL12A, ADAM17, CNTN1, LRP4, MVP	1.9	2.4e-06
GO:0061041	regulation of wound healing	36	1.5	CAV1, FOXA2, TNFRSF12A, PDGFA, EDN1, GJA1, TLR4, FAM46A, SERPINE2, HPSE, GSN, UBASH3B, SERPINE1, SOX15, THBS1, ANO6, CEACAM1, PRKCA, PLAT, STX2, TGFBR2, ANXA1, SMAD3, PRKCE, ANXA2, PLAUR, THBD, F3, TBXA2R, HBEGF, NFE2L2, TNFAIP3, PROS1, PHLDB2, PLAU, MYLK	2.2	2e-06
GO:0001503	ossification	76	3.2	MEF2C, NOG, PDLIM7, PTGS2, IL6ST, MMP9, FAM20C, FSTL3, GJA1, GLI3, NOCT, TGFB1, TGFB2, S1PR1, OSR1, ISG15, CTGF, SEMA7A, ILK, CREB3L1, DDX21, ANO6, CYR61, EGFR, SATB2, LEF1, CDK6, MMP14, JUNB, PTHLH, ACVR2B, CHRDL1, NAB2, NAB1, SORT1, STC1, FOXC1, EXT1, ACVR1, WNT5A, IFITM1, TNC, FHL2, SOX9, TPM4, PTK2, NIPBL, FAT4, PTN, RUNX1, TRAF6, RUNX2, SRGN, ERCC2, BMP4, BMP2, IL6, CEBPB, COL13A1, KLF10, MR…	1.7	3e-06
GO:0034613	cellular protein localization	260	11.1	RAB3GAP2, LYPD1, PTGS2, LTBP2, PTPN22, RANGAP1, AURKA, AURKB, NOV, BDNF, VPS13C, RAE1, RAB23, CEP290, PTPRK, TTC7A, ROCK1, KIF5B, ROCK2, UGCG, OPTN, NPC1, SPAG4, NPTN, TBC1D8B, NFKBIE, AKAP12, NFKBIA, HFE, RIMS2, SEMA5A, LIF, TRAM2, RAC2, HNMT, MACF1, NUP50, EFR3A, OBSL1, AGRN, STX11, FCHO2, BMP4, TP53BP2, TGFBR1, SPHK1, PTPN14, SMAD3, S100A10, SPDL1, PIBF1, CELSR1, EPHA2, GAS6, PTPN11, SYNE3, CC…	1.3	4.2e-06
GO:0007517	muscle organ development	77	3.3	MEF2C, POU6F1, NOG, MEF2A, MYH15, FOXK1, EDN1, TBX20, GJA1, ANKRD1, TGFB1, TGFB2, S1PR1, HLX, SOX15, MKX, NRG1, EGR1, EGR2, MYH3, EFNB2, FOXN2, LEF1, RB1, BASP1, SIX4, ARNTL, FLNB, SMTN, TAGLN, XIRP2, CFL2, SIX1, FOXC1, SGCE, WNT5A, CAV2, FGFR1, CAV1, FHL1, FHL3, ZBTB18, LIF, SPEG, DNER, CYP26B1, COL6A3, HEG1, BCL9L, SKIL, NKX2-5, BMP4, KLF5, MAFF, BMP2, IL6, ACTC1, TGFBR1, TGFBR2, LMNA, CENPF, S…	1.7	3.3e-06
GO:0071593	lymphocyte aggregation	90	3.8	MICB, ELF4, IL6ST, IL18, LEPR, PTPN22, IL15, ZEB1, RORA, PAWR, SDC4, GLI3, TGFB1, MAP3K7, HSPH1, SHB, GSN, GATA3, HLX, IL4R, CASP8, PIK3CA, PAK1, ADAM8, FANCA, CEACAM1, EBI3, AP3B1, EGR1, PIK3CG, ICAM1, SATB1, PTGER4, EFNB2, RELB, HLA-A, LEF1, CDK6, LIG4, NLRP3, HLA-E, MYH9, PDCD1LG2, CD83, CARD11, CAMK4, PDE5A, IL12A, ADAM17, PRDM1, PRNP, CAV1, STK10, HFE, IL7R, APBB1IP, STAT6, ZFP36L1, ZFP36L2,…	1.6	3.5e-06
GO:1904951	positive regulation of establishment of protein localization	101	4.3	PTGS2, XPO4, IL18, TLR2, PTPN22, TLR4, ANKRD1, PMAIP1, TGFB1, IL17RA, TGFB2, DAB2, GATA3, CEP290, ASPH, ADAM8, EGFR, IRS2, KIF5B, C2CD5, UGCG, HLA-E, VEGFC, RGCC, PAEP, WNT5A, GSDMD, ITGB1, SEMA5A, HNMT, RAC2, TMEM30A, BMP4, CARD8, TP53BP2, IL1RL1, TGFBR1, SPHK1, SMAD3, ITGA3, GAS6, EPHA2, NKX6-1, DDX58, CCT7, NMT1, CCT4, PLK3, ICE1, CD58, CD274, TCAF2, SPTBN1, TCAF1, TRIP6, CREBRF, ANO1, GJA1, G…	1.6	3.7e-06
GO:0033674	positive regulation of kinase activity	99	4.2	MEF2C, ADCY7, PDGFA, IL18, EDN1, IQGAP3, TNFSF15, CSPG4, TLR4, LPAR1, TLR6, TGFB1, IQGAP1, TGFB2, MAP3K7, CD44, TIAM1, MDFIC, ILK, PIK3CA, PDGFC, PDGFD, ADAM8, PIK3CG, EGFR, PIM1, CD40, STK4, IRS1, SPAG9, PLCE1, PDE5A, RGCC, MST1R, LRRK2, WNT5A, SNX9, FGFR1, CDK5R2, GNAI2, ADORA2B, AKAP13, AFAP1L2, ITGB3, PTK2, DYNAP, TRAF6, BMP4, BMP2, TGFBR1, TGFBR2, ITGA1, NCKAP1L, PIBF1, GAS6, PTPN11, EPHA4, …	1.6	3.9e-06
GO:0033157	regulation of intracellular protein transport	78	3.3	XPO1, PTGS2, XPO5, IL18, XPO4, TLR2, PTPN22, RANGAP1, TLR4, GLI3, TGFB1, GTSE1, NOV, TMEM173, DAB2, MDFIC, NBPF3, RAB23, CEP290, ASPH, TPR, NRG1, EGFR, SP100, HSP90AA1, KIF5B, C2CD5, ZDHHC8, UGCG, NLRP3, ECT2, PKIA, FLNA, STOM, GNAQ, HHAT, LRRK2, CSF3, APC2, NFKBIE, ABLIM3, PPP3R1, NFKBIA, SFN, TCF7L2, SEMA5A, HNMT, RAC2, SH3GLB1, BCL3, MTCL1, SH3TC2, TMEM30A, BMP4, IL6, HCLS1, TGFBR1, SPHK1, PTP…	1.7	3.6e-06
GO:0051726	regulation of cell cycle	170	7.3	XPO1, PTGS2, BTRC, PRR11, EDN1, TTK, AURKA, AURKB, HMGN5, TGFB1, KANK2, TGFB2, SHB, RAD21, BRINP2, CTGF, GATA3, CDKN2D, ILK, CRY1, MX2, ASPM, EGFR, PID1, PTPRK, CEP85, DTL, ROCK2, RBL1, PIM1, ESPL1, GPR132, ARNTL, MECOM, PKIA, JUNB, HHEX, NABP1, UHRF2, MCIDAS, RGCC, PDCD6IP, TNFAIP3, CCDC8, WNT5A, FGFR1, CAV2, CDK5R2, BLM, TICRR, SLF2, AFAP1L2, ANLN, SOX9, TIMP2, ITGB1, LIF, WAPL, HEXIM1, PTK6, F…	1.4	4.6e-06
GO:0018108	peptidyl-tyrosine phosphorylation	74	3.2	FGF5, IL6ST, IL18, CSPG4, TTK, SPINK1, IL15, CLK1, FER, IQGAP1, TGFB1, IL11, IL31RA, HSPH1, CD44, CLCF1, FGFR1OP2, TIE1, FGF1, NRG1, ERRFI1, EGFR, ICAM1, ARHGEF2, HSP90AA1, SOCS3, SOCS4, CD40, VEGFC, EREG, ZFYVE28, IL12A, NPTN, CNTN1, ADAM17, MST1R, MVP, CSF3, FGFR1, CSF2, CAV1, PEAK1, ABI2, AFAP1L2, CNTRL, ITGB3, GPRC5A, EPHB2, LIF, PTK2, PTK6, INPP5F, DYRK3, EHD4, IL6, LTK, HCLS1, MET, EFEMP1, …	1.7	3.8e-06
GO:1900180	regulation of protein localization to nucleus	52	2.2	PTGS2, IL18, TLR2, PTPN22, TLR4, GLI3, GTSE1, TGFB1, TGFB2, NOV, DAB2, TMEM173, TRIM8, MDFIC, RAB23, TPR, EGFR, HSP90AA1, NLRP3, PKIA, ECT2, FLNA, GNAQ, CSF3, APC2, NFKBIE, GLIS2, PPP3R1, NFKBIA, SEMA5A, LIF, BCL3, DCLK1, BMP4, IL6, TGFBR1, HCLS1, SPHK1, LMNA, SMAD3, SNAI2, WWTR1, GAS6, FZD7, CCT7, DDX58, RGS20, CCT4, PDE2A, FYN, MAPK14, TRIP6	1.9	3.2e-06
GO:0051249	regulation of lymphocyte activation	84	3.6	MEF2C, IL27RA, APLF, IL6ST, IL18, PTPN22, TLR4, IL15, ZEB1, PAWR, SDC4, GLI3, TGFB1, FLT3LG, MAP3K7, SHB, HSPH1, CLCF1, GSN, GATA3, HLX, IL4R, IL15RA, PIK3CA, PAK1, ADAM8, FANCA, CEACAM1, EBI3, AP3B1, IRS2, BST1, EFNB2, HLA-A, CD40, NLRP3, HLA-E, MMP14, PDCD1LG2, AHR, INHBA, CD83, CARD11, CAMK4, PDE5A, IL12A, PRDM1, TNFAIP3, PRNP, CAV1, SLC39A10, HFE, IL7R, STAT6, ZFP36L1, ZFP36L2, RAC2, SOS1, CY…	1.6	4e-06
GO:0072132	mesenchyme morphogenesis	19	0.8	WNT5A, BMP4, ACTC1, BMP2, NOG, TGFBR1, TBX20, TGFBR2, SMAD3, LEF1, SOX9, SNAI2, TGFB2, ACTG2, NOTCH1, OSR1, FOXC1, ENG, ACVR1	3.2	1.5e-06
GO:0061448	connective tissue development	55	2.3	MEF2C, NOG, EDN1, ZEB1, GLI3, TGFB1, TGFB2, NOV, CD44, OSR1, CTGF, CHST11, TGFBI, PIK3CA, PDGFD, LOXL2, CYR61, EGR1, SATB2, RARG, SIX2, HMGA2, PTHLH, ADAMTS7, HOXD3, LNPK, STC1, CARM1, WNT5A, FGFR1, ZNF516, WNT5B, CSF1, SOX9, SERPINH1, TIMP1, ITGB8, COL27A1, ADAMTS12, RUNX1, RUNX2, BMP4, BMP2, TGFBR1, EFEMP1, TGFBR2, SMAD3, SNAI2, COL5A1, ATP7A, HOXB3, SHOX2, NOTCH1, MAPK14, MEX3C	1.8	3.6e-06
GO:0061387	regulation of extent of cell growth	31	1.3	WNT5A, PLXNC1, PLXNA2, TNFRSF12A, TRPV2, CRABP2, L1CAM, CDH4, SEMA5A, NRCAM, BDNF, WDR36, MACF1, SEMA7A, BCL11A, ILK, SEMA3E, SEMA3C, PAFAH1B1, SEMA3A, PLXND1, NRG1, GOLGA4, FN1, MAP1B, DPYSL2, NKX6-1, SEMA6B, SEMA4F, SEMA4C, SEMA4B	2.4	2.6e-06
GO:1904019	epithelial cell apoptotic process	28	1.2	CAST, TCF7L2, IL11, SEMA5A, ZFP36L1, AKR1C3, GSN, GATA3, SERPINE1, THBS1, ANO6, ANGPTL4, SCG2, COL18A1, PIK3CG, ZFP36, ICAM1, IL6, TGFBR2, CD40, RB1, STK4, GAS6, NDNF, RGCC, SORT1, NFE2L2, TNFAIP3	2.5	2.5e-06
GO:0007067	mitotic nuclear division	87	3.7	KIF23, KIFC1, PRC1, BORA, EDN1, TTK, AURKA, AURKB, TGFB1, LATS2, OFD1, RAD21, INCENP, MTBP, MASTL, TPR, CCNA1, ASPM, STAG1, VCPIP1, KIF14, CEP85, ARHGEF2, KIF11, KIF15, TPX2, PAPD7, ESPL1, RB1, GEM, UBE2C, HMGA2, FLNA, DCTN1, ARHGEF10, EREG, SGO1, RGCC, CLIP1, PDCD6IP, SNX9, PAM, KIF4A, SLF2, CEP164, ANLN, NR3C1, CEP55, PHIP, WAPL, MAP10, NIPBL, FIGN, CENPC, BUB1, PPP1R12A, PAFAH1B1, HELLS, BUB3,…	1.6	4.5e-06
GO:0033673	negative regulation of kinase activity	58	2.5	FOXA2, STK38, PTPN22, SPRY4, LATS2, SHB, SPRY2, SPRY1, CDKN2D, ILK, SPRED2, SPRED1, ERRFI1, CEACAM1, CEP85, IRS2, SOCS3, SOCS4, RB1, UBE2C, PKIA, PPM1F, HHEX, GNAQ, ZFYVE28, GADD45B, TNFAIP3, GADD45A, GSTP1, MVP, CAV1, DBNDD2, SFN, GPRC5A, TRIB2, DUSP18, IRAK3, UBASH3B, HEXIM1, PTK6, APC, BMP4, FLRT3, FLRT2, IL6, CBL, WWTR1, GPS2, SH3BP5, DUSP5, CORO1C, AJUBA, DUSP4, DUSP1, GMFG, RGS4, DUSP7, DUS…	1.8	3.9e-06
GO:0071300	cellular response to retinoic acid	24	1	MUC1, WNT5A, MEF2C, LTK, RARG, WNT5B, TNC, PPARG, TEAD2, ABCA1, SOX9, AQP1, FZD4, FZD7, SETX, BRINP2, OSR1, SERPINF1, PTK6, CYP26B1, YAP1, OGT, ABL2, KLF4	2.7	2.3e-06
GO:0018212	peptidyl-tyrosine modification	74	3.2	FGF5, IL6ST, IL18, CSPG4, TTK, SPINK1, IL15, CLK1, FER, IQGAP1, TGFB1, IL11, IL31RA, HSPH1, CD44, CLCF1, FGFR1OP2, TIE1, FGF1, NRG1, ERRFI1, EGFR, ICAM1, ARHGEF2, HSP90AA1, SOCS3, SOCS4, CD40, VEGFC, EREG, ZFYVE28, IL12A, NPTN, CNTN1, ADAM17, MST1R, MVP, CSF3, FGFR1, CSF2, CAV1, PEAK1, ABI2, AFAP1L2, CNTRL, ITGB3, GPRC5A, EPHB2, LIF, PTK2, PTK6, INPP5F, DYRK3, EHD4, IL6, LTK, HCLS1, MET, EFEMP1, …	1.7	4.7e-06
GO:0006469	negative regulation of protein kinase activity	55	2.3	STK38, PTPN22, SPRY4, LATS2, SHB, SPRY2, SPRY1, CDKN2D, ILK, SPRED2, SPRED1, ERRFI1, CEACAM1, CEP85, SOCS3, SOCS4, RB1, UBE2C, PKIA, PPM1F, HHEX, GNAQ, ZFYVE28, GADD45B, TNFAIP3, GADD45A, GSTP1, MVP, CAV1, DBNDD2, SFN, GPRC5A, TRIB2, DUSP18, IRAK3, HEXIM1, UBASH3B, PTK6, APC, BMP4, FLRT3, FLRT2, IL6, CBL, WWTR1, GPS2, SH3BP5, DUSP5, CORO1C, DUSP4, DUSP1, GMFG, RGS4, DUSP7, DUSP6	1.8	4.1e-06
GO:0051346	negative regulation of hydrolase activity	82	3.5	CAST, HMSD, CPEB2, LXN, MMP9, LEPR, SPINK1, AQP1, IQGAP1, TGFB2, SPRY2, SPRY1, PICALM, CD44, SERPINE2, SERPINA5, CDKN2D, CASP8, SERPINE1, SERPINA1, MASTL, SPRED1, PI16, MKL1, TFPI2, WFDC10B, ROCK1, BST2, ROCK2, LEF1, CST1, IFI16, SPOCD1, FARP1, SLIT2, PLAUR, SERPINF1, ANXA8L1, SERPINB8, CST4, ANOS1, SORT1, SERPINB1, LRRK2, PROS1, PPP1R15A, WFDC2, CCDC8, WFDC3, CNN3, SPOCK3, C3, C5, TIMP4, PXK, SF…	1.6	5e-06
GO:0031032	actomyosin structure organization	39	1.7	KIF23, DLC1, MEF2A, CNN3, EDN1, EPB41L4A, ANKRD1, LPAR1, SDC4, ITGB1, FRMD5, FRMD6, S1PR1, CTGF, OBSL1, CNN2, ZYX, PAK1, NKX2-5, PHACTR1, ACTC1, MYH3, TGFBR1, S100A10, SMAD3, ACTN2, SIX4, MYH9, ARHGEF10, PPM1F, EPB41L2, TACSTD2, CFL2, MYPN, RGCC, FHOD3, MYH11, TMOD3, PHLDB2	2.1	3.7e-06
GO:0045446	endothelial cell differentiation	29	1.2	S1PR3, S1PR1, EZR, PLOD3, PPP1R12A, HEG1, PTN, AFDN, MSN, VEZF1, NRG1, COL18A1, BMP4, ICAM1, ROCK1, ROCK2, MET, PDE4D, MYADM, NOTCH1, ACVR2B, PDE2A, CLIC4, ID1, LAMA5, STC1, ENG, TJP2, ACVR1	2.4	3.2e-06
GO:0000070	mitotic sister chromatid segregation	38	1.6	KIF23, PAM, KIFC1, KIF4A, PRC1, SLF2, TTK, CEP55, AURKB, WAPL, MAP10, RAD21, NIPBL, CENPC, BUB1, TPR, BUB3, APC, KIF14, DLGAP5, PAPD7, KIF18A, CENPF, KIF18B, PIBF1, SPDL1, ESPL1, CENPE, RB1, UBE2C, CDC27, SMC2, ATM, SMC3, SMC4, ATRX, DUSP1, PDCD6IP	2.1	3.9e-06
GO:0042110	T cell activation	89	3.8	MICB, ELF4, IL6ST, IL18, LEPR, PTPN22, IL15, ZEB1, RORA, PAWR, SDC4, GLI3, TGFB1, MAP3K7, SHB, HSPH1, GSN, GATA3, HLX, IL4R, CASP8, PIK3CA, PAK1, ADAM8, FANCA, CEACAM1, EBI3, AP3B1, EGR1, PIK3CG, ICAM1, SATB1, PTGER4, EFNB2, RELB, HLA-A, LEF1, CDK6, LIG4, NLRP3, HLA-E, MYH9, PDCD1LG2, CD83, CARD11, CAMK4, PDE5A, IL12A, ADAM17, PRDM1, PRNP, CAV1, HFE, IL7R, APBB1IP, STAT6, ZFP36L1, ZFP36L2, DOCK2,…	1.6	5.7e-06
GO:0070489	T cell aggregation	89	3.8	MICB, ELF4, IL6ST, IL18, LEPR, PTPN22, IL15, ZEB1, RORA, PAWR, SDC4, GLI3, TGFB1, MAP3K7, SHB, HSPH1, GSN, GATA3, HLX, IL4R, CASP8, PIK3CA, PAK1, ADAM8, FANCA, CEACAM1, EBI3, AP3B1, EGR1, PIK3CG, ICAM1, SATB1, PTGER4, EFNB2, RELB, HLA-A, LEF1, CDK6, LIG4, NLRP3, HLA-E, MYH9, PDCD1LG2, CD83, CARD11, CAMK4, PDE5A, IL12A, ADAM17, PRDM1, PRNP, CAV1, HFE, IL7R, APBB1IP, STAT6, ZFP36L1, ZFP36L2, DOCK2,…	1.6	5.7e-06
GO:0009725	response to hormone	151	6.4	MEF2C, PTGS2, ADCY7, EDN1, TLR2, RANGAP1, RORA, AQP1, IQGAP1, TGFB1, KANK2, TGFB2, ATP2B1, DAB2, CTGF, PLOD3, PIK3CA, LOX, OGT, CRY1, EGFR, PID1, RBFOX2, IRS2, RARG, SOCS3, C2CD5, MED12, ACTN2, ARNTL, IRS1, JUNB, DDIT4, HHEX, NPC1, SERPINF1, CATSPER1, STC1, TGFB1I1, PAM, CAV2, CAV1, GNAI2, GNAI1, PAQR7, TIMP4, PAQR8, TIMP2, NR2C2, TIMP1, PAQR5, PTK2, HNMT, NKX2-1, BMP4, TAF1, TGFBR2, NR4A2, ITGA2…	1.4	6.9e-06
GO:0038127	ERBB signaling pathway	39	1.7	MMP9, AFAP1L2, FER, SOX9, GPRC5A, TGFB1, IQGAP1, SPRY2, PTK2, SPRY1, FAM83A, PTK6, SOS1, PIK3CA, SHC3, NRG1, ERRFI1, CEACAM1, RHBDF2, EGFR, HSP90AA1, EFEMP1, CBL, ERBIN, ITGA1, SOCS4, PTPN12, PLAUR, PTPN11, DOK1, PLCE1, EREG, EPS8, ZFYVE28, SH3KBP1, ADAM17, HBEGF, AREG, MVP	2.1	4.4e-06
GO:0001570	vasculogenesis	24	1	CAV1, MYO1E, TIPARP, TGFBR2, TEAD2, FZD4, JUNB, EPHA2, TGFB1, ZFP36L1, HHEX, PTK2, NOTCH1, ADM, HEG1, QKI, HAS2, YAP1, TIE1, SETD2, NKX2-5, ENG, RASA1, CEACAM1	2.7	3.1e-06
GO:0003158	endothelium development	32	1.4	GJA1, STARD13, S1PR3, S1PR1, EZR, PLOD3, PPP1R12A, HEG1, PTN, AFDN, MSN, VEZF1, NRG1, COL18A1, BMP4, ICAM1, ROCK1, ROCK2, MET, PDE4D, MYADM, STK4, NOTCH1, ACVR2B, PDE2A, CLIC4, ID1, LAMA5, STC1, ENG, TJP2, ACVR1	2.3	4.1e-06
GO:0043491	protein kinase B signaling	38	1.6	CSF3, GCNT2, PDGFA, IL18, SOX9, TCF7L2, TGFB1, SETX, SEMA5A, ZFP36L1, AKR1C3, SPRY2, PTK2, MEIS3, MC1R, HPSE, GATA3, ILK, PIK3CA, ADAM8, NRG1, THBS1, PIK3CG, EGFR, IL6, TGFBR1, HCLS1, AXL, CD40, RICTOR, GAS6, EPHA2, PLK3, F3, CPNE1, HBEGF, MST1R, KLF4	2.1	4.7e-06
GO:0072073	kidney epithelium development	38	1.6	MEF2C, FGFR1, NOG, ADAMTS16, SOX9, SDC4, GLI3, TGFB1, IQGAP1, LIF, SPRY1, OSR1, FAT4, GATA3, WNK4, PAX8, ILK, YAP1, FGF1, BMP4, BMP2, PODXL, MYO1E, EFNB2, SIX2, SMAD3, BASP1, SIX4, WWTR1, STAT1, SLIT2, FMN1, EPHA4, NOTCH1, LAMA5, TACSTD2, SIX1, FOXC1	2.1	4.7e-06
GO:0010811	positive regulation of cell-substrate adhesion	31	1.3	ZC3HAV1, IFITM1, IFITM2, IFITM3, OAS3, CXCL8, DEK, OAS1, EEA1, APOBEC3C, ISG20, APOBEC3D, ISG15, PCBP1, TRIM6, TOP2A, TNIP1, BST2, ROCK2, DDB1, PKN2, IFI16, HMGA2, GAS6, SRPK1, STOM, PLSCR1, NOTCH1, OASL, IFIT1, ATG16L2	2.3	4.1e-06
GO:0019079	viral genome replication	31	1.3	CSF1, HACD1, EDIL3, SDC4, CCL28, ABI3BP, IQGAP1, ILK, PTN, COL8A1, FN1, CYR61, ROCK1, CCDC80, SMAD3, S100A10, CDK6, ITGA3, PRKCE, DOCK5, MYADM, FLNA, NDNF, PPM1F, FMN1, VEGFC, UNC13D, CRKL, ITGA6, ITGA5, HAS2	2.3	4.1e-06
GO:0014812	muscle cell migration	23	1	PLAT, ROCK1, ANXA1, ITGA2, LPAR1, ITGB3, SIX4, DOCK5, IQGAP1, SLIT2, DOCK4, NOV, LRP1, SIX1, SERPINE1, ILK, HAS2, NFE2L2, PDGFD, IGFBP3, PLAU, GSTP1, PARVA	2.7	3.7e-06
GO:0043406	positive regulation of MAP kinase activity	51	2.2	MEF2C, PDGFA, EDN1, IQGAP3, CSPG4, TLR4, LPAR1, TLR6, TGFB1, IQGAP1, MAP3K7, NOD1, SAA1, MDFIC, TIAM1, CXCR4, ILK, PDGFC, PDGFD, PAK1, NRG1, FGF1, ADAM8, EGFR, PIK3CG, IRAK2, CD40, SPAG9, PLCE1, RIPK1, PDE5A, MST1R, LRRK2, WNT5A, FGFR1, ADORA2B, C5, AKAP13, THBS1, TRAF6, FZD8, BMP2, ITGA1, FZD4, PTPN11, DUSP5, AJUBA, EPHA4, MAPK14, DUSP7, DUSP6	1.9	6.3e-06
GO:0030099	myeloid cell differentiation	72	3.1	MEF2C, ARID4A, MMP9, PPARG, FAM20C, FSTL3, TLR4, TGFB1, IL11, IL31RA, SMAP1, GAB2, ISG15, GATA3, CASP8, PTBP3, OGT, CEACAM1, BATF3, ZFP36, PRKCA, RBFOX2, BATF2, SH3PXD2A, RELB, LEF1, ACTN1, CDK6, RB1, IFI16, MYH9, SIGLEC15, JUNB, INHBA, HHEX, CAMK4, RIPK1, CA2, CSF3, CSF2, CSF1, PML, NFKBIA, LIF, ZFP36L1, MEIS2, UBASH3B, DYRK3, PAFAH1B1, RUNX1, TRAF6, ERCC2, BMP4, CEBPB, EPAS1, HCLS1, KLF10, FBN1…	1.7	7.3e-06
GO:0007411	axon guidance	52	2.2	NRP2, NOG, PLXNA2, L1CAM, GLI3, TGFB2, NRCAM, BDNF, ROBO1, GATA3, SEMA7A, SEMA3E, SEMA3C, SEMA3A, EGR2, KIF5B, EFNB2, VASP, SLIT2, SEMA4F, SEMA4C, SEMA4B, ANOS1, OPHN1, EXT1, WNT5A, PLXNC1, CDH4, EPHB2, SEMA5A, PTK2, EZR, SOS1, NKX2-1, B3GNT2, PLXND1, ETV4, FLRT3, FLRT2, KLF7, NTN4, DPYSL2, LAMA2, FEZF1, EPHA4, SEMA6B, FYN, CHN1, SPTBN1, APBB2, FEZ2, SPTAN1	1.9	6.5e-06
GO:0033002	muscle cell proliferation	40	1.7	MEF2C, FGFR1, NOG, PTGS2, MMP9, IL18, TBX20, EDN1, PPARG, GJA1, IL15, TGFB2, NOV, S1PR1, ILK, TGM2, PDGFD, TRAF6, NRG1, THBS1, NKX2-5, EGFR, BMP4, IL6, TGFBR2, ITGA2, STAT1, CYBA, NOTCH1, EREG, MAPK14, SIX1, AKR1B1, IL12A, HBEGF, FOXC1, TNFAIP3, IGFBP3, KLF4, GSTP1	2	5.8e-06
GO:0002697	regulation of immune effector process	69	2.9	PVR, MICB, IL27RA, ZC3HAV1, APLF, IL18, PTPN22, TLR4, IL15, FER, TGFB1, TGFB2, MAP3K7, CFP, SHB, CD96, TMEM173, AP1S2, GAB2, HTRA1, CLCF1, GATA3, SEMA7A, IL4R, TRIM6, HLX, DDX60, RABGEF1, CFH, CEACAM1, BST2, HLA-A, HERC5, HLA-B, CD40, NLRP3, HLA-E, UNC13D, MB21D1, IL12A, TNFAIP3, PROS1, WNT5A, AP1M1, ADORA2B, C3, C5, PML, HFE, IL7R, SEC14L1, STAT6, IRAK3, DOCK2, RAC2, TRAF6, DHX58, IL6, LGALS3, C…	1.7	7.6e-06
GO:0001764	neuron migration	35	1.5	MEF2C, NRP2, FGFR1, SDCCAG8, CDK5R2, TUBB2B, TBX20, GJA1, NRCAM, PTK2, GATA3, DNER, NKX2-1, PAFAH1B1, SEMA3A, MKL1, NRG1, DCLK1, ASPM, GPR173, SATB2, HSP90AA1, AXL, NR4A2, ITGA3, CELSR1, NKX6-1, GAS6, NDNF, DDIT4, FEZF1, NAV1, FYN, KIF20B, APBB2	2.2	5.5e-06
GO:0048545	response to steroid hormone	78	3.3	CREBRF, PPARA, PTGS2, IGFBP7, EDN1, PPARG, TLR2, RORA, AQP1, TGFB1, KANK2, TGFB2, ATP2B1, AKR1C3, DAB2, CTGF, PAK1, LOX, CRY1, ERRFI1, FOSL1, NR2F1, EGFR, ZFP36, RBFOX2, RARG, MED12, LEF1, RB1, ARNTL, FOSB, HMGA2, SLIT2, DDIT4, NPC1, SERPINF1, ADM, NCOA3, CATSPER1, STC1, CA2, TGFB1I1, CARM1, GSTP1, PAM, CAV1, FHL2, PAQR7, PAQR8, NR3C1, NR2C2, PAQR5, ZFP36L1, ZFP36L2, NR1D1, HNMT, PTN, KDM3A, THBS…	1.6	8.2e-06
GO:0008154	actin polymerization or depolymerization	46	2	CSF3, LIMA1, ARHGAP18, ABI2, FER, CCL26, SEMA5A, CCL24, ACTR2, CDC42EP2, CDC42EP1, GSN, TMSB15B, CAP1, WIPF1, CDC42EP3, RASA1, ICAM1, CAP2, SWAP70, MICAL2, HCLS1, NCKAP1L, TMSB10, ACTN2, RICTOR, PRKCE, MYADM, SLIT2, VASP, NCKAP1, FMN1, CORO1A, EPS8, PLEKHH2, GMFG, CFL2, CAPG, FHOD3, FCHSD2, TMOD3, SPTBN1, TMSB4X, FCHSD1, SH3BGRL3, SPTAN1	1.9	6.6e-06
GO:0035023	regulation of Rho protein signal transduction	34	1.5	DLC1, ARHGEF28, AKAP13, MYO9B, ABCA1, LPAR1, ITGB1, PLEKHG4, PLEKHG2, PLEKHG1, TIAM2, TIAM1, ROBO1, SOS1, SOS2, PLEKHG5, ARHGAP42, ARHGEF40, FGD6, ALS2CL, ARHGDIB, ARHGEF3, ARHGEF2, ARHGEF1, ARHGEF18, TRIO, ITGA3, ECT2, ARHGEF10, FARP1, DNMBP, RASGRF1, GPR17, ARAP3	2.2	5.7e-06
GO:0034504	protein localization to nucleus	75	3.2	XPO1, PTGS2, IL18, TLR2, PTPN22, TLR4, GLI3, TGFB1, GTSE1, TGFB2, NOV, AKR1C3, TMEM173, DAB2, TRIM8, RAE1, MDFIC, RAB23, TPR, EGFR, HSP90AA1, SIX2, SIX4, NLRP3, ECT2, PKIA, FLNA, HHEX, GNAQ, IPO7, SIX1, KPNA7, CNEP1R1, KPNA4, KPNA3, CSF3, APC2, NFKBIE, GLIS2, PPP3R1, PML, NFKBIA, SOX9, LIF, SEMA5A, NUP214, NUP50, BCL3, DCLK1, BMP4, NUP153, IL6, TAF3, HCLS1, TGFBR1, SPHK1, SUN2, LMNA, SMAD3, SNAI2…	1.6	8.6e-06
GO:0097485	sister chromatid segregation	52	2.2	NRP2, NOG, PLXNA2, L1CAM, GLI3, TGFB2, NRCAM, BDNF, ROBO1, GATA3, SEMA7A, SEMA3E, SEMA3C, SEMA3A, EGR2, KIF5B, EFNB2, VASP, SLIT2, SEMA4F, SEMA4C, SEMA4B, ANOS1, OPHN1, EXT1, WNT5A, PLXNC1, CDH4, EPHB2, SEMA5A, PTK2, EZR, SOS1, NKX2-1, B3GNT2, PLXND1, ETV4, FLRT3, FLRT2, KLF7, NTN4, DPYSL2, LAMA2, FEZF1, EPHA4, SEMA6B, FYN, CHN1, SPTBN1, APBB2, FEZ2, SPTAN1	1.8	7.4e-06
GO:0000819	neuron projection guidance	52	2.2	KIF23, PAM, KIFC1, XPO1, KIF4A, PRC1, SLF2, TTK, AHCTF1, RANGAP1, AURKB, CEP55, WAPL, MAP10, NIPBL, RAD21, INCENP, CENPC, BUB1, PAFAH1B1, TPR, TOP2A, BUB3, STAG1, ERCC6L, APC, KIF14, CKAP5, DLGAP5, PAPD7, KIF18A, CENPF, KIF18B, ESPL1, CENPE, PIBF1, SPDL1, RB1, UBE2C, CDC27, SMC2, SMC3, ATM, CENPI, SMC4, ATRX, DUSP1, SGO2, SGO1, KNL1, CLIP1, PDCD6IP	1.8	7.4e-06
GO:0003007	heart morphogenesis	53	2.3	DLC1, MEF2C, NOG, TBX20, GJA1, ANKRD1, TGFB1, TGFB2, S1PR1, GATA3, ILK, SEMA3C, YAP1, NRG1, CYR61, MICAL2, MIB1, XIRP2, SIX1, FOXC1, HAS2, PARVA, ACVR1, WNT5A, FHL2, SOX9, PTK2, NIPBL, FAT4, SOS1, HEG1, PLXND1, NKX2-5, BMP4, FLRT2, BMP2, ACTC1, TGFBR1, TGFBR2, ASXL1, SMAD3, TEAD2, FZD2, SNAI2, PPP1R13L, COL5A1, SHOX2, NOTCH2, NOTCH1, DKK1, NEDD4, RBM15, ENG	1.8	7.6e-06
GO:0050727	regulation of inflammatory response	67	2.9	PPARA, PTGS2, LDLR, OSMR, IL6ST, IL18, PPARG, TLR2, TLR4, IL15, RORA, IL17RA, NOV, CFP, EDNRB, CASP4, SAA1, GATA3, SEMA7A, SERPINE1, CFH, RABGEF1, MGLL, ZYX, ADAM8, FANCA, TNIP1, NT5E, ZFP36, PIK3CG, EGFR, GBP5, PTGER4, SOCS3, NLRP3, NLRP1, SERPINF1, GPR17, TNFAIP3, PROS1, GSTP1, WNT5A, ADORA2B, C3, C5, GPSM3, CCL26, CCL24, TGM2, ADAMTS12, IL6, IL1RL1, CFB, ANXA1, ITGA2, SMAD3, C4BPB, RICTOR, BIR…	1.7	8.6e-06
GO:0090183	regulation of kidney development	20	0.9	EGR1, BMP4, NOG, PDGFA, SIX2, SIX4, BASP1, SOX9, STAT1, WWTR1, TGFB1, LIF, OSR1, FAT4, TACSTD2, GATA3, PAX8, SIX1, YAP1, PDGFD	2.9	4.2e-06
GO:0008361	regulation of cell size	43	1.8	WNT5A, PLXNC1, LRRC8A, PLXNA2, TNFRSF12A, TRPV2, CRABP2, EDN1, IQGAP3, L1CAM, IL7R, AQP1, CDH4, SEMA5A, NRCAM, BDNF, WDR36, EZR, MACF1, SEMA7A, BCL11A, SEMA3E, ILK, SEMA3C, PAFAH1B1, MSN, SEMA3A, PLXND1, NRG1, GOLGA4, ANO6, FN1, HSP90AA1, RARG, SLC12A4, MAP1B, DPYSL2, NKX6-1, KCNN4, SEMA6B, SEMA4F, SEMA4C, SEMA4B	2	7.4e-06
GO:0045892	negative regulation of transcription, DNA-templated	190	8.1	MEF2C, XPO1, NOG, MEF2A, BTRC, FST, ZNF451, EDN1, ANKRD1, AURKB, TGFB1, KANK2, DAB2, MDFIC, GATA3, FOXF2, DDX20, DAP, CRY1, AKIRIN2, RBFOX2, PTPRK, SATB1, SATB2, RARG, RCOR1, RELB, RBL1, HMG20A, HES7, UBR2, ARNTL, SIX4, BASP1, MECOM, DCAF1, PKIA, AHR, JUNB, HHEX, UHRF1, UHRF2, SIX1, PRDM5, PRDM1, NFE2L3, ZNF438, WNT5A, FGFR1, CAV1, ELK3, SOX9, TAGLN3, MEIS2, TCERG1, NIPBL, HEXIM1, NKX2-1, SKIL, B…	1.3	1.2e-05
GO:0046580	negative regulation of Ras protein signal transduction	17	0.7	STAMBP, DLC1, STMN3, FBP1, ITGA3, TIMP2, ITGB1, TGFB2, RASAL2, SPRY2, SPRY1, ARHGAP42, RABGEF1, RASA3, ARAP3, RASA1, RASA2	3.3	3.6e-06
GO:0045185	maintenance of protein location	29	1.2	TLN1, CAV1, LTBP1, TLN2, NFKBIE, HK2, PML, NFKBIA, HK1, EZR, VPS13C, GSN, TMSB15B, BCL3, SRGN, TAF3, FBN1, YWHAB, SUN2, SUN3, TMSB10, SHANK1, FLNB, FLNA, SYNE3, SYNE1, SYNE2, SPAG4, TMSB4X	2.3	6.4e-06
GO:0050770	regulation of axonogenesis	42	1.8	WNT5A, PLXNC1, PLXNA2, TNFRSF12A, TRPV2, CRABP2, L1CAM, CDH4, EPHB2, SEMA5A, NRCAM, PTK2, BDNF, WDR36, MACF1, TIAM1, ROBO1, SEMA7A, BCL11A, SEMA3E, ILK, SEMA3C, PAFAH1B1, SKIL, SEMA3A, PLXND1, NRG1, GOLGA4, FN1, ARHGEF1, MAP1B, DPYSL2, NKX6-1, SLIT2, SHOX2, EPHA4, SEMA6B, SEMA4F, SEMA4C, CHN1, SEMA4B, LRP4	2	8.1e-06
GO:0010243	response to organonitrogen compound	140	6	MEF2C, LYPD1, PTGS2, ADCY7, EDN1, TLR2, PTPN22, RANGAP1, AQP1, IQGAP1, TGFB1, GSTM2, TIAM1, CTGF, PDE4B, PIK3CA, PDGFC, ASPH, PDGFD, OGT, CRY1, EGFR, PIK3CG, PID1, RNLS, IRS2, SOCS3, C2CD5, UBR2, ACTN2, PDE4D, IRS1, JUNB, HHEX, THBD, STC1, LRRK2, TNFAIP3, CAV2, CAV1, BLM, GNAI2, GNAI1, NFKBIA, TIMP4, SOX9, TIMP1, IRAK3, PTK2, HNMT, KLF5, TAF1, KLF10, NR4A2, ERBIN, ITGA2, KCNK1, NKX6-1, PTPN11, P2…	1.4	1.3e-05
GO:0032102	negative regulation of response to external stimulus	59	2.5	PPARA, MICB, PDGFA, PPARG, EDN1, GJA1, RORA, KANK2, NOV, SERPINE2, SAA1, ROBO1, HTRA1, GATA3, SEMA7A, SEMA3E, SERPINE1, RABGEF1, SEMA3C, SEMA3A, NT5E, CEACAM1, ZFP36, PTGER4, SOCS3, NLRP3, SLIT2, PLAUR, THBD, SERPINF1, SEMA4F, SEMA4C, SEMA4B, GPR17, PRDM1, TNFAIP3, PROS1, GSTP1, WNT5A, C5, SEC14L1, SEMA5A, UBASH3B, INPP5F, THBS1, DHX58, PLAT, SMAD3, SNAI2, ANXA2, EPHA4, NOTCH1, IFIT1, SEMA6B, ETS…	1.8	9.6e-06
GO:0001885	endothelial cell development	21	0.9	COL18A1, ICAM1, ROCK1, ROCK2, MET, PDE4D, MYADM, S1PR3, EZR, PDE2A, CLIC4, ID1, PLOD3, PPP1R12A, HEG1, AFDN, STC1, MSN, VEZF1, ENG, TJP2	2.8	5e-06
GO:0051222	positive regulation of protein transport	90	3.8	CREBRF, PTGS2, IL18, XPO4, ANO1, TLR2, PTPN22, GJA1, TLR4, ANKRD1, GLI3, TGFB1, IL17RA, GTSE1, TGFB2, TMEM173, DAB2, SAA1, GATA3, TRIM6, IL4R, IL1RAP, NBPF3, CEP290, ASPH, TPR, ADAM8, NRG1, EGFR, IRS2, HSP90AA1, KIF5B, PTGER4, C2CD5, ZDHHC8, UGCG, RPH3AL, NLRP3, HLA-E, PRKCE, ECT2, NLRP1, FLNA, STOM, VEGFC, RGCC, HHAT, PAEP, CSF3, WNT5A, ABLIM3, C5, GSDMD, PPP3R1, SFN, TCF7L2, SEMA5A, EZR, HNMT, …	1.6	1.2e-05
GO:0051146	striated muscle cell differentiation	56	2.4	MEF2C, MEF2A, EDN1, ANKRD1, TGFB1, DMPK, FLT3LG, NOV, BDNF, IL4R, BHLHE41, NRG1, SIK1, CHUK, MYH3, EFNB2, LEF1, ACTN2, RB1, SIX4, MYH9, FLNC, MMP14, NEXN, SPAG9, CFL2, FHOD3, SORT1, ADAM12, ACVR1, CAV2, FHL2, AKAP13, ITGB1, DNER, CYP26B1, OBSL1, NFATC2, EHD1, NKX2-5, EHD2, BMP4, BMP2, RBM24, ACTC1, LMNA, CAPN2, SHOX2, NOTCH1, DKK1, MYPN, MAPK14, MYH11, TMOD3, CHRNB1, HDAC9	1.8	1.1e-05
GO:0033036	macromolecule localization	423	18.1	LTBP1, PTGS2, LTBP2, PLEKHM1, REP15, RANGAP1, MALL, RAE1, ADAM8, PTPRK, GBP5, TTC7A, KIF5B, ROCK1, ROCK2, UGCG, MYH9, NME4, NPC1, ADAMTS9, SPAG4, CCDC93, NFKBIE, HFE, AHCTF1, NFKBIA, ARFGEF2, RAC2, EFR3A, OBSL1, SPNS2, TGFBR1, SPHK1, PIBF1, SPDL1, ATM, GAS6, SYNE3, SYNE1, APOL1, SYNE2, TCAF2, TCAF1, MARCKS, SMURF1, SYTL3, APOL6, CREBRF, FOXA2, KCNAB2, LDLR, ATP10D, RTN2, LATS2, GTSE1, AP1S2, IL4R…	1.2	1.8e-05
GO:0008104	protein localization	373	15.9	LYPD1, RAB3GAP2, SEC31B, LTBP1, LTBP2, PTGS2, PLEKHM1, REP15, PTPN22, AURKA, RANGAP1, AURKB, NOV, BDNF, MALL, VPS13C, RAE1, PLOD3, WNK4, RAB23, CEP290, RAPGEF4, ADAM8, PTPRK, GBP5, TTC7A, KIF5B, ROCK1, ROCK2, UGCG, OPTN, CD40, MYH9, VEGFC, NPC1, ADAMTS9, SPAG4, RGCC, NPTN, TBC1D8B, CCDC93, NFKBIE, GSDMD, AKAP12, NFKBIA, AHCTF1, HFE, RIMS2, ARFGEF2, LIF, SEMA5A, TRAM2, RAC2, HNMT, MACF1, NUP50, EF…	1.2	1.7e-05
GO:1903507	negative regulation of nucleic acid-templated transcription	196	8.4	MEF2C, NOG, MEF2A, FST, EDN1, AURKB, FOXF2, CRY1, PTPRK, RARG, RCOR1, HMG20A, UBR2, DCAF1, MECOM, UHRF1, UHRF2, PRDM5, PRDM1, TAGLN3, HEXIM1, NKX2-1, NKX2-5, BMP4, KLF5, BMP2, KLF12, KLF10, ASXL1, SMAD3, SMYD2, GAS6, NKX6-1, SHOX2, IFI27, NOTCH1, ETS2, JAZF1, SMURF2, KAT6B, ENG, KLF4, NCOR2, BACH1, CREBRF, ZNF488, PPARA, FOXA2, TBX20, PPARG, ZEB2, ZEB1, RLIM, GLI3, ZBTB38, EDNRB, BHLHE41, NR2F1, …	1.3	1.6e-05
GO:0043408	regulation of MAPK cascade	123	5.3	MEF2C, STK38, PDGFA, EDN1, CSPG4, IQGAP3, PTPN22, TLR4, LPAR1, TLR6, TGFB1, IQGAP1, IL11, TGFB2, MAP3K7, CD44, TIAM1, CTGF, MDFIC, SEMA7A, ILK, SPRED2, PDGFC, PELI2, PDGFD, RNF149, SPRED1, ADAM8, EGFR, PIK3CG, CD40, MECOM, MAP4K4, SPAG9, PLCE1, PDE5A, NPTN, MST1R, LRRK2, GBP1, WNT5A, TNFRSF6B, FGFR1, CAV2, CAV1, GCNT2, GNAI2, ADORA2B, AKAP13, ULK4, TIMP2, LIF, DUSP18, IRAK3, TRAF6, FN1, BMP4, BMP…	1.4	1.5e-05
GO:0010001	glial cell differentiation	44	1.9	ZNF488, FGF5, PARD3, NOG, IL6ST, VIM, PPARG, TLR2, TLR4, LPAR1, SOX9, GLI3, TGFB1, LIF, SERPINE2, CXCR4, CLCF1, DNER, ILK, NKX2-1, NDRG1, AFDN, SH3TC2, NRG1, ERCC2, EGFR, BMP2, EGR2, MED12, LEF1, CDK6, NLGN3, HMGA2, ARHGEF10, NKX6-1, PTPN11, LAMA2, PRDM8, EPHA4, NOTCH1, NAB2, NAB1, MYRF, GSTP1	1.9	1.1e-05
GO:2000351	regulation of endothelial cell apoptotic process	17	0.7	COL18A1, ICAM1, CD40, NDNF, GAS6, IL11, SEMA5A, AKR1C3, GATA3, SERPINE1, RGCC, NFE2L2, THBS1, TNFAIP3, ANO6, ANGPTL4, SCG2	3.2	5.4e-06
GO:0045071	negative regulation of viral genome replication	19	0.8	BST2, IFITM1, ZC3HAV1, IFITM2, IFITM3, OAS3, OAS1, IFI16, HMGA2, SRPK1, APOBEC3C, ISG20, APOBEC3D, PLSCR1, OASL, IFIT1, ISG15, TRIM6, TNIP1	3	6.5e-06
GO:1902679	negative regulation of RNA biosynthetic process	198	8.5	MEF2C, NOG, MEF2A, FST, EDN1, AURKB, FOXF2, CRY1, PTPRK, RARG, RCOR1, HMG20A, UBR2, DCAF1, MECOM, UHRF1, UHRF2, PRDM5, PRDM1, TAGLN3, HEXIM1, NKX2-1, NKX2-5, BMP4, KLF5, BMP2, KLF12, KLF10, ASXL1, SMAD3, SMYD2, GAS6, NKX6-1, SHOX2, NOTCH1, IFI27, ETS2, JAZF1, SMURF2, KAT6B, ENG, KLF4, NCOR2, BACH1, CREBRF, ZNF488, PPARA, FOXA2, TBX20, PPARG, ZEB2, ZEB1, RLIM, GLI3, ZBTB38, EDNRB, BHLHE41, NR2F1, …	1.3	1.9e-05
GO:0018105	peptidyl-serine phosphorylation	55	2.3	CLSPN, STK38, TTK, AURKA, AURKB, CLK1, LATS2, TGFB1, IL11, DMPK, SPRY2, CD44, PKN3, TRIM6, ILK, PIK3CA, MASTL, PAK1, AKT3, PRKCA, SGK1, PKN2, PDE4D, PRKCE, HMGA2, STK4, DDIT4, PPM1F, MAST4, CAMK4, RIPK1, LRRK2, PPP1R15A, PRKD3, WNT5A, CSF3, CAV1, LIF, STK38L, DCLK1, TAF1, IL6, TGFBR1, HCLS1, TGFBR2, CSNK1A1L, SMG1, RICTOR, GAS6, ATM, DKK1, CSNK1E, MAPK13, MAPK14, BCAR3	1.8	1.3e-05
GO:2000027	regulation of organ morphogenesis	56	2.4	NOG, PDGFA, EDN1, TGFB1, TGFB2, DAB2, SPRY1, TNFRSF11B, TIAM1, GATA3, PAX8, FGF1, CEACAM1, MED12, SIX2, BASP1, SIX4, HMGA2, TACSTD2, SIX1, FOXC1, CARM1, TNFAIP3, ACVR1, WNT5A, FGFR1, LIMS2, CSF1, PML, SOX9, LIF, PTN, RUNX2, ETV5, ETV4, BMP4, BMP2, TGFBR1, TGFBR2, NTN4, FZD2, CELSR1, SNAI2, STAT1, FZD4, PSMB8, FZD7, FOXP2, PSMB9, NOTCH1, DKK1, PRICKLE1, PRICKLE2, SMURF2, SMURF1, ENG	1.8	1.3e-05
GO:0030278	regulation of ossification	44	1.9	MEF2C, WNT5A, NOG, PDLIM7, IFITM1, IL6ST, CSF1, FAM20C, GJA1, SOX9, GLI3, TGFB1, NOCT, TGFB2, PTK2, NIPBL, S1PR1, OSR1, ISG15, ILK, RUNX2, ANO6, SRGN, CYR61, BMP4, IL6, BMP2, CEBPB, EGR2, PTGER4, SIX2, SMAD3, CDK6, SNAI2, ECM1, NOTCH1, ACVR2B, ID1, MAPK14, AREG, SMURF1, TOB2, LRP4, ACVR1	1.9	1.2e-05
GO:0050921	positive regulation of chemotaxis	33	1.4	CXCL1, WNT5A, FGFR1, CXCL3, CSF1, CXCL2, GPSM3, CXCL8, LPAR1, TGFB1, SEMA5A, S1PR1, RAC2, TIAM1, SERPINE1, PDGFD, THBS1, ANO6, SCG2, IL6, SWAP70, MET, NCKAP1L, SMAD3, ITGA2, GAS6, SLIT2, PPM1F, VEGFC, F3, IL12A, ADAM17, CAMK1D	2.2	1.1e-05
GO:1903037	regulation of leukocyte cell-cell adhesion	66	2.8	PPARA, IL6ST, IL18, PTPN22, IL15, ZEB1, PAWR, SDC4, GLI3, TGFB1, MAP3K7, SHB, HSPH1, CD44, GSN, GATA3, IL4R, HLX, PIK3CA, PAK1, ADAM8, FANCA, EBI3, CEACAM1, AP3B1, EFNB2, HLA-A, NLRP3, HLA-E, PDCD1LG2, CARD11, CD83, CAMK4, PDE5A, IL12A, HAS2, PRDM1, PRNP, CAV1, HFE, IL7R, CCL28, RAC2, SOS1, CYP26B1, TRAF6, BMP4, IL6, PELI1, CEBPB, LGALS3, LGALS1, TGFBR2, ANXA1, NCKAP1L, RICTOR, PTPN11, CLPTM1, CD…	1.7	1.5e-05
GO:1904018	positive regulation of vasculature development	37	1.6	WNT5A, PTGS2, C3, C5, CXCL8, ITGB2, TNFSF12, AQP1, SEMA5A, CCL24, CCBE1, SERPINE1, PDGFD, RUNX1, FGF1, THBS1, CEACAM1, ANGPTL4, PRKCA, EGR1, EFNB2, TGFBR2, SPHK1, ECM1, ANXA3, VEGFC, NOTCH1, SRPX2, ADM, ETS1, ITGA5, F3, TBXA2R, JAK1, NFE2L2, HDAC9, ENG	2.1	1.2e-05
GO:0018209	peptidyl-serine modification	57	2.4	CLSPN, STK38, TTK, AURKA, AURKB, CLK1, LATS2, TGFB1, IL11, DMPK, SPRY2, CD44, PKN3, TRIM6, ILK, PIK3CA, MASTL, PAK1, AKT3, PRKCA, SGK1, PKN2, PDE4D, PRKCE, HMGA2, STK4, NDNF, DDIT4, PPM1F, MAST4, CAMK4, RIPK1, LRRK2, PPP1R15A, PRKD3, CSF3, WNT5A, CAV1, SPOCK3, LIF, STK38L, DCLK1, TAF1, IL6, TGFBR1, HCLS1, TGFBR2, CSNK1A1L, SMG1, RICTOR, GAS6, ATM, DKK1, CSNK1E, MAPK13, MAPK14, BCAR3	1.7	1.5e-05
GO:0071222	cellular response to lipopolysaccharide	38	1.6	CSF3, MEF2C, WNT5A, CSF2, IL18, TLR2, CXCL8, NFKBIA, PTPN22, TLR4, ANKRD1, ABCA1, TGFB1, EDNRB, NR1D1, PDE4B, SERPINE1, TRAF6, PRKCA, ZFP36, IRAK2, ICAM1, IL6, CEBPB, LY96, AXL, PDE4D, CD40, PRKCE, NLRP3, PLSCR4, MAPK14, PLSCR3, IL12A, TBXA2R, PRDM1, TNFAIP3, GSTP1	2	1.3e-05
GO:0051147	regulation of muscle cell differentiation	41	1.8	MEF2C, MEF2A, IL18, EDN1, AKAP13, ZEB1, SOX9, NR2C2, TGFB1, FLT3LG, DMPK, NOV, ZFP36L1, BDNF, IL4R, CYP26B1, ILK, NFATC2, EHD1, NRG1, PLCB1, SIK1, BHLHE41, EHD2, NKX2-5, BMP4, RBM24, BMP2, EFNB2, RCAN1, MMP14, SHOX2, SPAG9, NOTCH1, DKK1, EREG, PRICKLE1, MAPK14, HDAC9, ENG, IGFBP3	2	1.4e-05
GO:0071219	cellular response to molecule of bacterial origin	39	1.7	CSF3, MEF2C, WNT5A, CSF2, IL18, TLR2, CXCL8, NFKBIA, PTPN22, TLR4, ANKRD1, ABCA1, TLR6, TGFB1, EDNRB, NR1D1, PDE4B, SERPINE1, TRAF6, PRKCA, IRAK2, ZFP36, ICAM1, IL6, CEBPB, LY96, AXL, PDE4D, CD40, PRKCE, NLRP3, PLSCR4, MAPK14, PLSCR3, IL12A, TBXA2R, PRDM1, TNFAIP3, GSTP1	2	1.4e-05
GO:0042306	regulation of protein import into nucleus	42	1.8	CSF3, PTGS2, APC2, NFKBIE, IL18, TLR2, PPP3R1, NFKBIA, PTPN22, TLR4, GLI3, TGFB1, SEMA5A, NOV, TMEM173, DAB2, MDFIC, RAB23, BCL3, TPR, EGFR, BMP4, IL6, HSP90AA1, TGFBR1, HCLS1, SPHK1, SMAD3, SNAI2, WWTR1, NLRP3, PKIA, ECT2, FZD7, FLNA, GAS6, DDX58, RGS20, PDE2A, GNAQ, MAPK14, TRIP6	1.9	1.5e-05
GO:0048771	tissue remodeling	37	1.6	MEF2C, CAV1, IL18, LEPR, CSPG4, PML, GJA1, IL15, ITGB3, TGFB1, TGFB2, LIF, TNFRSF11B, S1PR1, RAC2, TPP1, UBASH3B, TGM2, SEMA3C, TRAF6, ADAM8, CEACAM1, EGFR, IL6, EPAS1, PDK4, ANXA1, AXL, MMP14, SIGLEC15, EPHA2, ATP7A, NOTCH2, ACVR2B, FOXC1, CA2, TNFAIP3	2	1.4e-05
GO:0046824	positive regulation of nucleocytoplasmic transport	32	1.4	CSF3, PTGS2, XPO4, IL18, TLR2, PPP3R1, PTPN22, TLR4, SFN, TCF7L2, GLI3, GTSE1, TGFB1, SEMA5A, DAB2, TMEM173, TPR, EGFR, BMP4, IL6, HSP90AA1, TGFBR1, HCLS1, SPHK1, SMAD3, ECT2, FLNA, GAS6, DDX58, NEDD4, MAPK14, TRIP6	2.2	1.4e-05
GO:0003279	cardiac septum development	28	1.2	WNT5A, NOG, LTBP1, TBX20, LUZP1, C5ORF42, TGFB2, ANK2, GATA3, HEG1, PLXND1, NKX2-5, PCSK5, CYR61, BMP4, TGFBR1, TGFBR2, FZD2, NOTCH2, ADAMTS6, NOTCH1, XIRP2, PRDM1, LRP2, ENG, RBM15, PARVA, ACVR1	2.3	1.2e-05
GO:0052548	regulation of endopeptidase activity	75	3.2	CAST, DLC1, HMSD, LXN, MMP9, PPARG, TNFSF15, SPINK1, PMAIP1, AQP1, ACVR1C, PICALM, NOD1, CD44, SERPINE2, CASP8AP2, GSN, ROBO1, CTGF, SERPINA5, CDKN2D, CASP8, SERPINE1, SERPINA1, ASPH, DAP, MKL1, TFPI2, AKIRIN2, CYR61, BST2, LEF1, CST1, IFI16, NLRP3, NLRP1, PLAUR, PPM1F, SERPINF1, ANXA8L1, F3, SERPINB8, CST4, RIPK1, ANOS1, SERPINB1, PROS1, WFDC2, WFDC3, SPOCK3, C3, C5, PML, TIMP4, SFN, TIMP2, SERP…	1.6	2.1e-05
GO:1900182	positive regulation of protein localization to nucleus	34	1.5	CSF3, PTGS2, GLIS2, IL18, TLR2, PPP3R1, PTPN22, TLR4, GLI3, GTSE1, TGFB1, TGFB2, SEMA5A, LIF, TMEM173, DAB2, TRIM8, TPR, EGFR, BMP4, IL6, HSP90AA1, TGFBR1, HCLS1, SPHK1, SMAD3, ECT2, FLNA, CCT7, DDX58, CCT4, FYN, MAPK14, TRIP6	2.1	1.5e-05
GO:0010256	endomembrane system organization	104	4.4	LYPD1, RAB3GAP2, TSPAN5, TGFB1, TGFB2, KIFC3, DMPK, DAB2, ANK1, DYSF, SERPINE2, ANK2, RAE1, PID1, KIF5B, ROCK1, TTC7A, C2CD5, ROCK2, ACTN2, OPTN, DCTN1, ANXA8L1, SPAG4, LNPK, CLIP1, PDCD6IP, LRRK2, GBP1, SNX9, CAV2, CAV1, ABCA1, ARFGEF2, ITGB1, TJAP1, TRAM2, MACF1, NUP50, EFR3A, OBSL1, AHNAK2, NDRG1, SH3TC2, FCHO2, SRGN, S100A10, ITGA3, REEP1, REEP2, GAS6, EPHA2, SYNE1, SYNE2, PLK3, LAMA5, SPTBN1…	1.5	2.3e-05
GO:0045069	regulation of viral genome replication	25	1.1	IFITM1, ZC3HAV1, IFITM2, IFITM3, OAS3, CXCL8, OAS1, APOBEC3C, APOBEC3D, ISG20, ISG15, TRIM6, TNIP1, TOP2A, BST2, DDB1, PKN2, IFI16, HMGA2, SRPK1, STOM, PLSCR1, IFIT1, OASL, NOTCH1	2.4	1.2e-05
GO:0044085	cellular component biogenesis	434	18.5	MEF2C, DLC1, KIFC1, MEF2A, ISG20, CTGF, ILK, PLS3, PTPRK, GBP5, ROCK1, ROCK2, MYH3, SPAG9, FCHSD2, FCHSD1, PMP22, KIF4A, AHCTF1, HFE, HSPA1A, CDC42EP2, CDC42EP1, RAC2, OBSL1, CDC42EP3, TGFBR1, PIBF1, ATM, GAS6, WDR62, FAM161A, AREG, TAF1B, LIMA1, SYNJ1, NAP1L3, NOCT, OFD1, WDR36, NOD1, SRPX, IL1RAP, SERPINA1, WDR35, ATF7IP, RAP2A, SH3PXD2A, STX2, ANP32E, TPX2, FBLIM1, KIAA0586, BBS12, RFTN1, MMP1…	1.2	3e-05
GO:0033598	mammary gland epithelial cell proliferation	12	0.5	WNT5A, STAT6, CEBPB, ROBO1, BTRC, GATA3, IQGAP3, BRCA2, AREG, AGAP2, EPHA2, ETV4	4.1	5.5e-06
GO:0002685	regulation of leukocyte migration	39	1.7	CXCL1, WNT5A, STK10, CSF1, CXCL3, C5, GPSM3, CXCL2, CXCL8, PTPN22, CCL28, TGFB1, NOV, CCL24, RAC2, SERPINE1, RABGEF1, PDGFD, MSN, ADAM8, PLCB1, THBS1, ANO6, ICAM1, IL6, MPP1, PTGER4, LGALS3, SWAP70, ANXA1, NCKAP1L, ITGA2, ECM1, GAS6, SLIT2, VEGFC, IL12A, ADAM17, CAMK1D	2	1.7e-05
GO:0007045	cell-substrate adherens junction assembly	20	0.9	DLC1, PTPRK, ROCK1, FERMT2, ITGA2, S100A10, ACTN1, SMAD3, ACTN2, MMP14, SDC4, IQGAP1, AJUBA, PPM1F, FMN1, CORO1C, LAMA5, THBS1, TRIP6, PHLDB2	2.8	1.1e-05
GO:0048041	focal adhesion assembly	20	0.9	DLC1, PTPRK, ROCK1, FERMT2, ITGA2, S100A10, ACTN1, SMAD3, ACTN2, MMP14, SDC4, IQGAP1, AJUBA, PPM1F, FMN1, CORO1C, LAMA5, THBS1, TRIP6, PHLDB2	2.8	1.1e-05
GO:0010638	positive regulation of organelle organization	110	4.7	SYT1, RAB3GAP2, MMP9, EDN1, AURKA, LPAR1, AURKB, PMAIP1, TGFB1, ANK1, RAD21, CTGF, GATA3, OGT, KIF5B, C2CD5, ROCK2, PLD6, UGCG, ESPL1, ACTN2, LIG4, DCTN1, PLAUR, RGCC, CLIP1, PDCD6IP, WNT5A, SLF2, SEMA5A, LIF, CDC42EP2, NIPBL, CDC42EP1, HNMT, RAC2, CDC42EP3, MUC1, TP53BP2, TGFBR1, NCKAP1L, S100A10, SMAD3, ATM, NCKAP1, CCT7, NMT1, CORO1A, PLK4, CCT4, DNMT1, PIP4K2A, SYNJ1, FER, SDC4, ACTR2, GSN, C…	1.5	2.7e-05
GO:0003012	muscle system process	80	3.4	MEF2C, MEF2A, TLN1, TACR3, PTGS2, IL6ST, EDN1, TBX20, GJA1, IL15, VCL, DMPK, EDNRA, ACTG2, EDNRB, GSTM2, DYSF, STAC, ANK2, GSN, CTGF, TIAM1, PDE4B, SNTB1, PIK3CA, ASPH, HTR1D, ERRFI1, CHUK, PIK3CG, PRKCA, HSP90AA1, ROCK1, ROCK2, MYH3, RAP1GDS1, PDE4D, ACTN2, FLNA, PLCE1, TNNT1, SMTN, HTR7, PDE5A, STC1, SGCE, CAV1, ADORA2B, VIM, AKAP13, TPM2, TPM4, MYL9, ANXA6, ARHGAP42, INPP5F, NKX2-5, MYOF, RCSD…	1.6	2.4e-05
GO:0060537	muscle tissue development	74	3.2	MEF2C, NOG, MEF2A, MYH15, EDN1, TBX20, GJA1, ANKRD1, TGFB1, TGFB2, S1PR1, OSR1, HLX, SOX15, SEMA3C, SIK1, NRG1, EGR1, EGR2, EFNB2, FOXN2, LEF1, ACTN2, RB1, SIX4, ARNTL, NEXN, FLNB, XIRP2, CFL2, SIX1, FHOD3, FOXC1, ACVR1, WNT5A, CAV2, FGFR1, CAV1, TIPARP, FHL2, AKAP13, SOX9, ITGB1, ZBTB18, DNER, CYP26B1, OBSL1, HEG1, BCL9L, SKIL, NKX2-5, BMP4, KLF5, MAFF, BMP2, ACTC1, TGFBR1, TGFBR2, LMNA, CENPF, …	1.6	2.4e-05
GO:0050680	negative regulation of epithelial cell proliferation	32	1.4	MEF2C, WNT5A, CAV2, CAV1, LIMS2, GJA1, SFN, SOX9, TGFB1, TGFB2, ROBO1, GATA3, PTN, THBS1, ETV4, CEACAM1, SCG2, BMP4, PTPRK, TGFBR1, NKX2-8, EFNB2, BRCA2, CDK6, RB1, SNAI2, STAT1, SERPINF1, EREG, RGCC, MCC, ENG	2.2	1.6e-05
GO:0048608	reproductive structure development	82	3.5	NOG, ARID4A, PTGS2, E2F7, PPARG, ARID4B, FSTL3, TGFB2, AKR1C3, OSR1, SERPINE2, HTRA1, GATA3, CASP8, FOXF2, SOX15, SEMA3A, FNDC3A, FANCA, FOSL1, ASPM, CYR61, EGFR, ICAM1, RARG, SOCS3, MMP19, LEF1, BASP1, SIX4, HMGA2, MMP14, STK4, JUNB, SLIT2, WDR48, INHBA, SERPINF1, ADM, EREG, ASB1, STC1, FOXC1, PRDM1, WNT5A, CSF2, TNC, TIPARP, KMT2B, SOX9, LIF, ZFP36L1, PEG10, PTK2, NIPBL, ITGB8, PLCD3, NKX2-1, B…	1.6	2.5e-05
GO:0045619	regulation of lymphocyte differentiation	36	1.5	IL18, IL15, ZEB1, IL7R, GLI3, TGFB1, FLT3LG, ZFP36L1, ZFP36L2, SHB, GATA3, IL4R, SOS1, HLX, CYP26B1, IL15RA, ADAM8, FANCA, AP3B1, BMP4, IL6, TGFBR2, ANXA1, AXL, NCKAP1L, MMP14, NLRP3, GAS6, CLPTM1, CD83, CARD11, INHBA, CAMK4, IL12A, IRF1, PRDM1	2	1.8e-05
GO:0016192	vesicle-mediated transport	239	10.2	TGOLN2, SYT1, SEC31B, PEAR1, PDLIM7, PITPNB, PICALM, BRPF3, GAB2, VPS13C, SERPINE1, PIK3CA, RAPGEF4, PIK3CG, KIF5B, OPTN, MYH9, DCTN1, VEGFC, SPAG9, NPC1, ADAMTS9, CD163L1, UNC13D, TBC1D8B, KIF4A, CDK5R2, CCDC93, HFE, RIMS2, ARFGEF2, LGALS3BP, RAC2, STX11, FCHO2, IL1RAPL1, LGALS3, TGFBR2, S100A10, NCKAP1L, TINAGL1, ECM1, GAS6, NCKAP1, NOTCH1, CD55, APOL1, CNIH3, CD59, SYTL3, AREG, LDLR, FAM3C, MY…	1.3	3.1e-05
GO:0060541	respiratory system development	47	2	WNT5A, FGFR1, NOG, PDGFA, TNC, FSTL3, CIC, SOX9, GLI3, LIF, SPRY2, SPRY1, CTGF, PLOD3, CCBE1, NKX2-1, PTN, HEG1, YAP1, LOX, FGF1, ERRFI1, BMP4, EGFR, RARG, EPAS1, NKX2-8, ASXL1, TGFBR2, LEF1, ITGA3, BASP1, SIX4, CELSR1, HMGA2, MMP14, FOXP2, ATP7A, MAN2A1, TNS3, HHEX, NOTCH1, ACVR2B, LAMA5, ID1, SIX1, KLF2	1.8	2.1e-05
GO:0030512	negative regulation of transforming growth factor beta receptor signaling pathway	22	0.9	CAV2, CAV1, LTBP1, TGFBR1, FBN1, ZNF451, TGFBR2, SMAD3, HSPA1A, TGFB1, PEG10, HTRA1, CHST11, ADAM17, NKX2-1, SMURF2, BCL9L, HTRA3, TGFB1I1, SMURF1, SKIL, ENG	2.6	1.3e-05
GO:1903845	negative regulation of cellular response to transforming growth factor beta stimulus	22	0.9	CAV2, CAV1, LTBP1, TGFBR1, FBN1, ZNF451, TGFBR2, SMAD3, HSPA1A, TGFB1, PEG10, HTRA1, CHST11, ADAM17, NKX2-1, SMURF2, BCL9L, HTRA3, TGFB1I1, SMURF1, SKIL, ENG	2.6	1.3e-05
GO:0010564	regulation of cell cycle process	109	4.7	XPO1, BTRC, EDN1, TTK, AURKA, AURKB, HMGN5, TGFB1, KANK2, RAD21, CTGF, CDKN2D, CRY1, PID1, EGFR, CEP85, ROCK2, PIM1, ESPL1, GPR132, PKIA, UHRF2, RGCC, PDCD6IP, CCDC8, WNT5A, CAV2, FGFR1, BLM, TICRR, SLF2, ANLN, SOX9, LIF, WAPL, FBXO43, OBSL1, NDRG1, PRPF40A, MUC1, BMP4, TAF1, MKI67, BRCA2, ATAD5, CDC27, PSMB8, ATM, PSMB9, CSPP1, PLK4, PLK3, TMOD3, KIF23, CLSPN, E2F7, BORA, GTSE1, MTBP, SOX15, TPR…	1.5	3e-05
GO:0030323	respiratory tube development	43	1.8	WNT5A, FGFR1, NOG, PDGFA, TNC, FSTL3, CIC, SOX9, GLI3, LIF, SPRY2, SPRY1, CTGF, PLOD3, CCBE1, NKX2-1, PTN, HEG1, YAP1, LOX, FGF1, ERRFI1, PCSK5, BMP4, EGFR, EPAS1, NKX2-8, TGFBR2, ASXL1, ITGA3, CELSR1, MMP14, HMGA2, FOXP2, ATP7A, MAN2A1, TNS3, HHEX, NOTCH1, ACVR2B, LAMA5, ID1, KLF2	1.9	2.1e-05
GO:0046634	regulation of alpha-beta T cell activation	23	1	IL6, IL18, TGFBR2, ANXA1, HLA-A, HFE, NCKAP1L, PTPN22, HLA-E, NLRP3, GLI3, SHB, CD83, HSPH1, CD55, HLX, IL4R, GATA3, IL12A, IRF1, PRDM1, EBI3, AP3B1	2.5	1.4e-05
GO:0046635	positive regulation of alpha-beta T cell activation	19	0.8	IL6, IL18, TGFBR2, ANXA1, HLA-A, NCKAP1L, PTPN22, HLA-E, NLRP3, GLI3, SHB, HSPH1, CD83, CD55, HLX, IL4R, IL12A, EBI3, AP3B1	2.8	1.2e-05
GO:0009890	negative regulation of biosynthetic process	240	10.2	MEF2C, NOG, MEF2A, FST, EDN1, AURKB, LPAR1, FOXF2, CRY1, PTPRK, RARG, RCOR1, HMG20A, UBR2, DCAF1, MECOM, UHRF1, UHRF2, PRDM5, PRDM1, GNAI2, IGF2BP2, IGF2BP3, TAGLN3, LPCAT1, HEXIM1, NKX2-1, NKX2-5, BMP4, KLF5, BMP2, KLF12, KLF10, ASXL1, SMAD3, PIBF1, SMYD2, NKX6-1, GAS6, SHOX2, NOTCH1, IFI27, ETS2, JAZF1, SMURF2, KAT6B, ENG, NCOR2, KLF4, BACH1, CREBRF, ZNF488, PPARA, FOXA2, CPEB2, PPARG, TBX20, G…	1.3	3.7e-05
GO:0048525	maintenance of location in cell	30	1.3	TLN1, CAV1, TLN2, NFKBIE, HK2, PML, NFKBIA, HK1, ARHGAP21, EZR, VPS13C, GSN, TMSB15B, BCL3, PAFAH1B1, ASPM, SRGN, TAF3, SUN2, YWHAB, SUN3, TMSB10, SHANK1, FLNB, FLNA, SYNE3, SYNE1, SYNE2, SPAG4, TMSB4X	2.2	1.8e-05
GO:0051651	negative regulation of viral process	30	1.3	MICB, ZC3HAV1, IFITM1, IFITM2, IFITM3, PML, OAS3, OAS1, SEC14L1, APOBEC3C, APOBEC3D, ISG20, ISG15, TRIM8, HTRA1, GSN, TRIM6, PTX3, TNIP1, DHX58, ZFP36, SP100, BST2, IFI16, HMGA2, STAT1, SRPK1, PLSCR1, OASL, IFIT1	2.2	1.8e-05
GO:0044802	single-organism membrane organization	149	6.4	RAB3GAP2, SYT1, LYPD1, TSPAN5, PMAIP1, TGFB1, TGFB2, DMPK, NRCAM, DAB2, DYSF, ANK1, MALL, ANK2, TIAM1, RAE1, RABGEF1, EGFR, PID1, TTC7A, ROCK1, KIF5B, PLD6, ROCK2, C2CD5, BCL2A1, ACTN2, OPTN, DCTN1, NPC1, SPAG4, CATSPER1, CLIP1, ANKFY1, GBP1, SNX9, CAV2, CAV1, ITGB2, HSPA1A, ABCA1, ITGB1, ZMYND8, TRAM2, DOCK2, MACF1, NUP50, EFR3A, AHNAK2, NDRG1, AGRN, STX11, SH3TC2, FCHO2, IL1RAPL1, TMEM30A, RAB8…	1.4	3.4e-05
GO:0034332	adherens junction organization	32	1.4	PVR, DLC1, FERMT2, RASSF8, SDC4, CDH4, IQGAP1, VCL, PTK2, SLK, MACF1, AFDN, THBS1, PTPRK, RAB8B, ROCK1, ROCK2, S100A10, ACTN1, SMAD3, ITGA2, NECTIN3, ACTN2, MMP14, PPM1F, CORO1C, FMN1, AJUBA, LAMA5, CDH18, TRIP6, PHLDB2	2.1	2e-05
GO:0032388	positive regulation of intracellular transport	61	2.6	CREBRF, PTGS2, IL18, XPO4, TLR2, PTPN22, TLR4, GLI3, TGFB1, GTSE1, TMEM173, DAB2, GAB2, IL4R, NBPF3, CEP290, ASPH, MSN, TPR, NRG1, EGFR, HSP90AA1, KIF5B, C2CD5, ZDHHC8, UGCG, ECT2, FLNA, STOM, HHAT, CSF3, ADORA2B, ABLIM3, PPP3R1, SFN, TCF7L2, SEMA5A, EZR, HNMT, RAC2, SH3GLB1, MTCL1, TMEM30A, BMP4, IL6, TGFBR1, HCLS1, SPHK1, SMAD3, PRR5L, GAS6, DDX58, PLK3, NEDD4, ICE1, MAPK14, KIF20B, TCAF2, TCAF…	1.7	2.7e-05
GO:0097190	apoptotic signaling pathway	107	4.6	FHIT, NOG, MMP9, TLR4, TNFSF12, PMAIP1, TGFB1, TGFB2, CD44, CASP8AP2, CDKN2D, SERPINE1, CREB3L1, DAP, BCL2A1, CD40, STK4, DDIT4, PLAUR, NFE2L2, TNFAIP3, LRRK2, TNFRSF6B, TRAF1, FGFR1, CAV1, MCL1, TNFRSF12A, HSPA1A, MEIS3, ERO1A, ITGAV, SKIL, HELLS, SRGN, BMP4, MUC1, LGALS3, TP53BP2, TGFBR1, NR4A2, SMAD3, BRCA2, EPHA2, ATM, NMT1, IFI27, UACA, ITGA6, ZMAT1, PAWR, HSPH1, TNFRSF11B, CASP4, SRPX, GSN,…	1.5	3.3e-05
GO:0030217	T cell differentiation	47	2	IL18, LEPR, PTPN22, IL15, ZEB1, RORA, IL7R, GLI3, TGFB1, STAT6, ZFP36L1, ZFP36L2, SHB, DOCK2, GATA3, IL4R, SOS1, HLX, BCL3, ADAM8, RUNX2, FANCA, AP3B1, BMP4, EGR1, FZD8, SATB1, IL6, PTGER4, RELB, TGFBR2, ANXA1, LEF1, NCKAP1L, CDK6, LIG4, NLRP3, FZD7, ATP7A, CLPTM1, CARD11, CD83, CAMK4, IL12A, IRF1, ADAM17, PRDM1	1.8	2.5e-05
GO:1904589	regulation of protein import	42	1.8	CSF3, PTGS2, APC2, NFKBIE, IL18, TLR2, PPP3R1, NFKBIA, PTPN22, TLR4, GLI3, TGFB1, SEMA5A, NOV, TMEM173, DAB2, MDFIC, RAB23, BCL3, TPR, EGFR, BMP4, IL6, HSP90AA1, TGFBR1, HCLS1, SPHK1, SMAD3, SNAI2, WWTR1, NLRP3, PKIA, ECT2, FZD7, FLNA, GAS6, DDX58, RGS20, PDE2A, GNAQ, MAPK14, TRIP6	1.9	2.3e-05
GO:0051701	interaction with host	39	1.7	PVR, CAV2, CAV1, IFITM1, LDLR, ZC3HAV1, IFITM2, IFITM3, HSPA1A, ITGB3, ITGB1, TGFB1, SLC1A5, TRIM8, CXCR4, GSN, TAP2, ITGAV, CASP8, PTX3, TNIP1, SELPLG, ICAM1, NUP153, LGALS1, EFNB2, AXL, SMAD3, ITGA2, GAS6, CD55, NPC1, IFIT1, LAMP3, NEDD4, ITGA5, KPNA7, KPNA4, KPNA3	2	2.3e-05
GO:0051495	positive regulation of cytoskeleton organization	44	1.9	CSF3, CEP120, EDN1, ABI2, LPAR1, FER, SDC4, CCL26, SEMA5A, CCL24, ACTR2, CDC42EP2, CDC42EP1, CTGF, GSN, WIPF1, PAK1, CDC42EP3, SYNPO, ICAM1, NES, SWAP70, ROCK2, TGFBR1, HCLS1, S100A10, NCKAP1L, SMAD3, ACTN2, RICTOR, PRKCE, ARHGEF10, DCTN1, VASP, NCKAP1, PPM1F, FMN1, CORO1A, PLK4, GMFG, ID1, CFL2, RGCC, CLIP1	1.9	2.6e-05
GO:0051783	regulation of nuclear division	40	1.7	WNT5A, CAV2, SLF2, BORA, EDN1, TTK, ANLN, AURKA, TGFB1, GPR3, LIF, PHIP, FBXO43, MTBP, BUB1, OBSL1, TPR, PLCB1, BUB3, APC, BMP4, CEP85, KIF11, MKI67, MSH2, DLGAP5, CENPF, ESPL1, CENPE, RB1, UBE2C, CDC27, ATM, ATRX, DUSP1, EREG, RGCC, KIF20B, PDCD6IP, CCDC8	1.9	2.4e-05
GO:0051153	regulation of striated muscle cell differentiation	27	1.2	MEF2C, EDN1, AKAP13, TGFB1, FLT3LG, DMPK, NOV, BDNF, IL4R, CYP26B1, SIK1, NRG1, EHD1, BHLHE41, NFATC2, EHD2, NKX2-5, BMP4, RBM24, BMP2, EFNB2, MMP14, SHOX2, NOTCH1, DKK1, MAPK14, HDAC9	2.3	1.9e-05
GO:1901699	cellular response to nitrogen compound	103	4.4	MEF2C, LYPD1, GNA15, PTGS2, ADCY7, ZC3HAV1, EDN1, PTPN22, RANGAP1, AQP1, TGFB1, GSTM2, PDE4B, PIK3CA, PDGFC, PDGFD, OGT, PID1, PIK3CG, EGFR, IRS2, C2CD5, SOCS3, ACTN2, UBR2, PDE4D, IRS1, STC1, LRRK2, CAV2, CAV1, GNAI2, BLM, SOX9, PTK2, AGRN, KLF5, TAF1, KLF10, NR4A2, SMAD3, NKX6-1, PTPN11, UCP2, MTR, DNMT1, HDAC9, KLF2, KLF4, NCOR2, CPEB2, PPARG, FER, ZEB1, TMEM173, NOD1, CASP4, PAK1, PLCB1, ERRF…	1.5	3.6e-05
GO:0030324	lung development	42	1.8	WNT5A, FGFR1, NOG, PDGFA, TNC, FSTL3, CIC, SOX9, GLI3, LIF, SPRY2, SPRY1, CTGF, PLOD3, CCBE1, NKX2-1, PTN, HEG1, YAP1, LOX, FGF1, ERRFI1, BMP4, EGFR, EPAS1, NKX2-8, TGFBR2, ASXL1, ITGA3, CELSR1, MMP14, HMGA2, FOXP2, ATP7A, MAN2A1, TNS3, HHEX, NOTCH1, ACVR2B, LAMA5, ID1, KLF2	1.9	2.7e-05
GO:0007173	cytokinesis	32	1.4	MMP9, AFAP1L2, SOX9, GPRC5A, TGFB1, IQGAP1, SPRY2, PTK2, SPRY1, FAM83A, PTK6, SOS1, PIK3CA, SHC3, ERRFI1, EGFR, EFEMP1, CBL, ERBIN, ITGA1, SOCS4, PLAUR, PTPN11, DOK1, PLCE1, EREG, EPS8, ZFYVE28, SH3KBP1, ADAM17, HBEGF, AREG	2.1	2.4e-05
GO:0000910	epidermal growth factor receptor signaling pathway	32	1.4	KIF23, SNX9, KIF4A, PRC1, E2F7, DIAPH2, AHCTF1, ANLN, MITD1, AURKB, CEP55, ACTR2, MAP10, INCENP, RASA1, APC, STAMBP, KIF14, ROCK2, PKN2, BRCA2, ESPL1, PRKCE, MYH9, ECT2, CSPP1, SVIL, KIF20B, CENPV, SPTBN1, SNX33, CIT	2.1	2.4e-05
GO:0001837	epithelial to mesenchymal transition	29	1.2	S100A4, WNT5A, NOG, GCNT2, FOXA2, SOX9, TCF7L2, TGFB1, TGFB2, DAB2, FOXF2, NKX2-1, BCL9L, LOXL2, BMP4, BMP2, TGFBR1, TGFBR2, LEF1, SMAD3, WWTR1, SNAI2, HMGA2, NOTCH1, RGCC, HAS2, TGFB1I1, ENG, ACVR1	2.2	2.3e-05
GO:0031327	negative regulation of cellular biosynthetic process	236	10.1	MEF2C, NOG, MEF2A, FST, EDN1, AURKB, LPAR1, FOXF2, CRY1, PTPRK, RARG, RCOR1, HMG20A, UBR2, DCAF1, MECOM, UHRF1, UHRF2, PRDM5, PRDM1, GNAI2, IGF2BP2, IGF2BP3, TAGLN3, HEXIM1, NKX2-1, NKX2-5, BMP4, KLF5, BMP2, KLF12, KLF10, ASXL1, SMAD3, PIBF1, SMYD2, NKX6-1, GAS6, SHOX2, NOTCH1, IFI27, ETS2, JAZF1, SMURF2, KAT6B, ENG, NCOR2, KLF4, BACH1, CREBRF, ZNF488, PPARA, FOXA2, CPEB2, PPARG, TBX20, GJA1, ZEB…	1.3	4.6e-05
GO:0051235	maintenance of location	61	2.6	PPARA, TLN1, LTBP1, TLN2, PPARG, TGFB1, ACVR1C, ARHGAP21, GSTM2, STARD4, VPS13C, ANK2, GSN, TMSB15B, ASPH, CRY1, HTR1D, ASPM, PDE4D, TMSB10, PRKCE, FLNB, FLNA, SPAG4, TMSB4X, CAV1, C3, NFKBIE, PML, HK2, NFKBIA, HK1, ABCA1, ITGB3, EZR, PLIN2, ERO1A, UBASH3B, ITGAV, BCL3, PAFAH1B1, RASA3, EHD1, SRGN, TRPC1, IL6, TAF3, FBN1, YWHAB, SUN2, SUN3, SHANK1, ITPR3, ITPR1, ITPR2, SYNE3, CYBA, CORO1A, SYNE1,…	1.7	3.3e-05
GO:0002753	cytoplasmic pattern recognition receptor signaling pathway	19	0.8	IRAK2, IFIH1, ZC3HAV1, ERBIN, NFKBIA, PTPN22, TLR4, HSPA1A, BIRC3, SEC14L1, MAP3K7, DDX58, NOD1, DDX60, CASP8, TRAF6, TNFAIP3, CHUK, DHX58	2.8	1.7e-05
GO:0030595	leukocyte chemotaxis	45	1.9	CXCL1, WNT5A, CSF1, CXCL3, C5, GPSM3, EDN1, CXCL2, CXCL8, ITGB2, IL17RA, CCL26, TGFB2, NOV, CCL24, EDNRB, HRH1, S1PR1, RAC2, CXCR4, SAA1, CH25H, PDE4B, SERPINE1, ADAM8, THBS1, ANO6, SCG2, PIK3CG, IL6, MPP1, LGALS3, SWAP70, ANXA1, ITGA1, NCKAP1L, PDE4D, SLIT2, GAS6, VEGFC, CYP7B1, CORO1A, IL12A, ADAM17, CAMK1D	1.8	3e-05
GO:0061458	reproductive system development	82	3.5	NOG, ARID4A, PTGS2, E2F7, PPARG, ARID4B, FSTL3, TGFB2, AKR1C3, OSR1, SERPINE2, HTRA1, GATA3, CASP8, FOXF2, SOX15, SEMA3A, FNDC3A, FANCA, FOSL1, ASPM, CYR61, EGFR, ICAM1, RARG, SOCS3, MMP19, LEF1, BASP1, SIX4, HMGA2, MMP14, STK4, JUNB, SLIT2, WDR48, INHBA, SERPINF1, ADM, EREG, ASB1, STC1, FOXC1, PRDM1, WNT5A, CSF2, TNC, TIPARP, KMT2B, SOX9, LIF, ZFP36L1, PEG10, PTK2, NIPBL, ITGB8, PLCD3, NKX2-1, B…	1.5	3.9e-05
GO:0051896	regulation of protein kinase B signaling	33	1.4	CSF3, GCNT2, PDGFA, IL18, TCF7L2, TGFB1, SEMA5A, AKR1C3, SPRY2, PTK2, MEIS3, MC1R, HPSE, GATA3, ILK, INPP5F, NRG1, THBS1, ADAM8, EGFR, PIK3CG, IL6, TGFBR1, HCLS1, AXL, RICTOR, GAS6, EPHA2, F3, CPNE1, HBEGF, MST1R, KLF4	2.1	2.7e-05
GO:0010558	negative regulation of macromolecule biosynthetic process	227	9.7	MEF2C, NOG, MEF2A, FST, EDN1, AURKB, FOXF2, CRY1, PTPRK, RARG, RCOR1, HMG20A, UBR2, DCAF1, MECOM, UHRF1, UHRF2, PRDM5, PRDM1, IGF2BP2, IGF2BP3, TAGLN3, HEXIM1, NKX2-1, NKX2-5, BMP4, KLF5, BMP2, KLF12, KLF10, ASXL1, SMAD3, SMYD2, NKX6-1, GAS6, SHOX2, NOTCH1, IFI27, ETS2, JAZF1, SMURF2, KAT6B, ENG, NCOR2, KLF4, BACH1, CREBRF, ZNF488, PPARA, FOXA2, CPEB2, TBX20, PPARG, GJA1, ZEB2, ZEB1, RLIM, GLI3, …	1.3	4.9e-05
GO:0035987	endodermal cell differentiation	17	0.7	COL4A2, MMP9, ITGB2, HMGA2, MMP14, COL5A1, INHBA, LAMB3, DKK1, COL7A1, ITGA5, ITGAV, COL12A1, LAMB1, COL8A1, FN1, DUSP6	3	1.6e-05
GO:0090092	regulation of transmembrane receptor protein serine/threonine kinase signaling pathway	48	2	WNT5A, CAV2, CAV1, NOG, LTBP1, LTBP4, TBX20, FST, ZNF451, FSTL3, TTK, HFE, HSPA1A, ZEB1, TGFB1, TGFB2, NOV, DAB2, PEG10, HTRA1, ILK, CHST11, NKX2-1, BCL9L, HTRA3, SKIL, THBS1, CYR61, BMP4, BMP2, TGFBR1, TGFBR2, FBN1, SMAD3, ITGA3, WWTR1, DKK3, INHBA, NOTCH1, ACVR2B, CHRDL1, DKK1, ADAM17, SMURF2, TGFB1I1, SMURF1, ENG, ACVR1	1.8	3.3e-05
GO:0009791	post-embryonic development	27	1.2	KMT2A, MYO7A, TIPARP, CCDC66, GATA3, CHST11, SCN9A, AGO2, SEMA3C, HEG1, ERCC2, BMP4, MYO1E, TGFBR1, EFEMP1, FBN1, NR4A2, PPP1R13L, ITPR1, FOXP2, SOD2, ATRX, ACVR2B, GNAQ, MFAP2, PRDM1, KLF4	2.3	2.4e-05
GO:0050818	regulation of coagulation	26	1.1	CAV1, FOXA2, PDGFA, EDN1, TLR4, FAM46A, PROCR, SERPINE2, UBASH3B, HPSE, SERPINE1, THBS1, ANO6, CEACAM1, PLAT, PRKCA, STX2, ANXA5, ANXA2, PLAUR, THBD, F3, TBXA2R, NFE2L2, PROS1, PLAU	2.3	2.4e-05
GO:0045934	negative regulation of nucleobase-containing compound metabolic process	220	9.4	MEF2C, NOG, MEF2A, FST, EDN1, LPAR1, AURKB, FOXF2, DHX34, PTBP3, CRY1, PTPRK, RARG, RCOR1, HMG20A, UBR2, DCAF1, MECOM, UHRF1, UHRF2, PRDM5, PRDM1, GNAI2, TAGLN3, HEXIM1, CDA, NKX2-1, NKX2-5, BMP4, KLF5, BMP2, KLF12, KLF10, ASXL1, SMAD3, SMYD2, NKX6-1, ATM, GAS6, SHOX2, NOTCH1, IFI27, ETS2, JAZF1, SMURF2, KAT6B, ENG, KLF4, NCOR2, BACH1, CREBRF, ZNF488, PPARA, FOXA2, TBX20, PPARG, GJA1, ZEB2, ZEB1,…	1.3	5.7e-05
GO:0060602	branch elongation of an epithelium	10	0.4	WNT5A, BMP4, SPRY2, SPRY1, TNC, YAP1, AREG, FGF1, SOX9, TGFB1	4.7	8.3e-06
GO:0030522	intracellular receptor signaling pathway	56	2.4	PPARA, ZC3HAV1, PPARG, PTPN22, TLR4, RORA, KANK2, MAP3K7, DAB2, NOD1, DDX60, CASP8, PAK1, CRY1, CHUK, NR2F1, IRAK2, RBFOX2, RARG, SP100, ACTN4, PIM1, MED12, ARNTL, RB1, HMGA2, AHR, NCOA3, TGFB1I1, CARM1, TNFAIP3, DCBLD2, IFIH1, PML, FHL2, NFKBIA, HSPA1A, NR3C1, SEC14L1, NR1D1, CYP26B1, KDM3A, TRAF6, DHX58, ASXL2, TAF1, ASXL1, NR4A2, ERBIN, SNAI2, BIRC3, DDX58, NOTCH2, CYP7B1, MED30, NEDD4	1.7	3.9e-05
GO:0032147	activation of protein kinase activity	62	2.6	CLSPN, ADCY7, IL18, CSPG4, TNFSF15, IQGAP3, TLR4, LPAR1, TLR6, TGFB2, MAP3K7, NOD1, CXCR4, SAA1, MDFIC, PIK3CA, PDGFC, ADAM8, FGF1, NRG1, KIF14, IRAK2, EGFR, CCDC88A, TPX2, ECT2, CARD10, SPAG9, PLCE1, ACVR2B, CRKL, RIPK1, RGCC, LRRK2, GADD45B, GADD45A, WNT5A, GNAI2, ADORA2B, C5, AKAP13, ITGB3, MAP3K7CL, DYNAP, MAP3K1, TRAF6, THBS1, BMP4, BMP2, TGFBR1, FBN1, TGFBR2, ITGA1, NCKAP1L, PIBF1, GAS6, PT…	1.7	4.1e-05
GO:0010629	negative regulation of gene expression	236	10.1	MEF2C, NOG, MEF2A, FST, EDN1, PTPN22, AURKB, PICALM, SERPINE2, RAE1, CTGF, SERPINE1, FOXF2, PTBP3, CRY1, PTPRK, RARG, RCOR1, HMG20A, UBR2, DCAF1, MECOM, UHRF1, UHRF2, SERPINF1, PRDM5, PRDM1, IGF2BP2, IGF2BP3, TAGLN3, HEXIM1, NUP50, NKX2-1, NKX2-5, PLAG1, BMP4, KLF5, BMP2, KLF12, KLF10, ASXL1, SMAD3, SMYD2, NKX6-1, GAS6, SHOX2, NOTCH1, IFI27, CD55, CD59, ETS2, JAZF1, SMURF2, KAT6B, ENG, NCOR2, KLF…	1.3	5.6e-05
GO:0061005	cell differentiation involved in kidney development	18	0.8	BMP4, MEF2C, GLIS2, MYO1E, PODXL, SIX2, BASP1, STAT1, WWTR1, GLI3, IQGAP1, LIF, NOTCH1, OSR1, FAT4, GATA3, PAX8, YAP1	2.9	2e-05
GO:1901652	response to peptide	85	3.6	PPARA, ADCY7, CPEB2, PPARG, EDN1, TLR2, PTPN22, GJA1, RANGAP1, FER, TGFB1, IQGAP1, ACVR1C, CASP4, NOD1, CTGF, PIK3CA, PAK1, OGT, CRY1, ERRFI1, CEACAM1, GPR173, EGR1, PID1, ARHGEF2, IRS2, EGR2, C2CD5, SOCS3, ACTN2, CDC5L, LPIN1, IRS1, NLRP1, HHEX, EREG, ADM, SORT1, GNB4, CA2, TNFAIP3, GSTP1, CAV2, CAV1, GNAI2, GNAI1, NFKBIA, GNG11, TIMP4, TIMP1, PHIP, ZFP36L1, PTK2, SOS1, PCSK9, KLF5, IL6, PTPRE, …	1.5	4.4e-05
GO:0097191	extrinsic apoptotic signaling pathway	50	2.1	PMAIP1, TNFSF12, TGFB1, TGFB2, SRPX, CASP8AP2, BAG3, CASP8, SERPINE1, YAP1, NRG1, AGAP2, ICAM1, ARHGEF2, SP100, BCL2A1, STK4, EYA4, INHBA, TNFRSF10D, RIPK1, IL12A, SORT1, G0S2, TNFAIP3, GSTP1, ACVR1, FGFR1, CSF2, CAV1, MCL1, TNFRSF12A, PML, HSPA1A, TCF7L2, PHIP, ITGAV, SKIL, THBS1, SCG2, BMP4, TMC8, LGALS3, TGFBR1, LMNA, SMAD3, SNAI2, CASP10, ITGA6, FYN	1.8	3.8e-05
GO:0072006	nephron development	35	1.5	MEF2C, NOG, PDGFA, ADAMTS16, SOX9, GLI3, TGFB1, IQGAP1, LIF, OSR1, FAT4, GATA3, WNK4, PAX8, ILK, YAP1, PDGFD, FGF1, EGR1, BMP4, BMP2, PODXL, MYO1E, SIX2, ITGA3, BASP1, SIX4, WWTR1, STAT1, FMN1, NOTCH1, PLCE1, TACSTD2, LAMA5, SIX1	2	3.2e-05
GO:0051017	actin filament bundle assembly	33	1.4	DLC1, LIMA1, PAWR, LPAR1, SDC4, ITGB1, S1PR1, EZR, CTGF, ZYX, PAK1, PLS3, SYNPO, PHACTR1, PTGER4, ACTN4, ROCK1, MYO1B, SWAP70, ROCK2, TGFBR1, ALMS1, S100A10, ACTN1, SMAD3, SHANK1, ARHGEF10, PPM1F, EPS8, ID1, TACSTD2, RGCC, PHLDB2	2.1	3.2e-05
GO:1903844	regulation of cellular response to transforming growth factor beta stimulus	28	1.2	CAV2, CAV1, LTBP1, LTBP4, ZNF451, HSPA1A, ZEB1, TGFB1, PEG10, DAB2, HTRA1, CHST11, NKX2-1, BCL9L, HTRA3, SKIL, THBS1, TGFBR1, TGFBR2, FBN1, SMAD3, ITGA3, DKK3, ADAM17, SMURF2, TGFB1I1, SMURF1, ENG	2.2	2.9e-05
GO:0017015	regulation of transforming growth factor beta receptor signaling pathway	28	1.2	CAV2, CAV1, LTBP1, LTBP4, ZNF451, HSPA1A, ZEB1, TGFB1, PEG10, DAB2, HTRA1, CHST11, NKX2-1, BCL9L, HTRA3, SKIL, THBS1, TGFBR1, TGFBR2, FBN1, SMAD3, ITGA3, DKK3, ADAM17, SMURF2, TGFB1I1, SMURF1, ENG	2.2	2.9e-05
GO:0050679	positive regulation of epithelial cell proliferation	39	1.7	WNT5A, NRP2, CAV2, NOG, IQGAP3, ITGB3, TNFSF12, SOX9, TGFB1, CCL26, SEMA5A, CCL24, OSR1, HTRA1, PTN, FGF1, LAMB1, AGAP2, SCG2, PRKCA, EGFR, BMP4, IL6, BMP2, TGFBR1, RICTOR, HMGA2, ECM1, FZD7, FOXP2, WDR48, CYBA, VEGFC, CYP7B1, NOTCH1, ID1, F3, HAS2, TNFAIP3	1.9	3.6e-05
GO:0000280	nuclear division	106	4.5	KIFC1, PRC1, EDN1, TTK, AURKA, AURKB, TGFB1, MEI1, RAD21, INCENP, CCNA1, ASPM, STAG1, CEP85, PLD6, ESPL1, UBR2, GEM, DCTN1, SGO2, SGO1, RGCC, CLIP1, PDCD6IP, CCDC8, WNT5A, SNX9, CAV2, PAM, KIF4A, SLF2, CEP164, ANLN, LIF, WAPL, NIPBL, FBXO43, OBSL1, HELLS, ERCC6L, BMP4, MKI67, CKAP5, BRCA2, PIBF1, SPDL1, MISP, CDC27, ATM, EPS8, KIF23, BORA, LATS2, OFD1, ACTR2, MTBP, MASTL, TPR, PLCB1, TOP2A, FANCA…	1.4	5.3e-05
GO:0072009	nephron epithelium development	30	1.3	MEF2C, NOG, ADAMTS16, SOX9, GLI3, IQGAP1, TGFB1, LIF, OSR1, FAT4, WNK4, GATA3, PAX8, ILK, YAP1, FGF1, BMP4, BMP2, PODXL, MYO1E, SIX2, SIX4, BASP1, WWTR1, STAT1, FMN1, NOTCH1, TACSTD2, LAMA5, SIX1	2.1	3.2e-05
GO:0043122	regulation of I-kappaB kinase/NF-kappaB signaling	52	2.2	S100A4, PTGS2, SLC20A1, ZC3HAV1, BTRC, IL18, TLR2, GJA1, TLR4, RORA, LPAR1, TLR6, MAP3K7, NOV, NOD1, TRIM8, CASP8, PELI2, TNIP1, CHUK, BST2, OPTN, CD40, PRKCE, NLRP3, ECT2, TANK, FLNA, CARD11, RIPK1, TNFAIP3, GSTP1, AKAP13, NFKBIA, PLEKHG5, TGM2, BCL3, TRAF6, TRAF5, PELI1, CARD8, IL1RL1, LGALS1, SPHK1, BIRC3, STAT1, ECM1, AJUBA, CASP10, FYN, CPNE1, TRIP6	1.7	4.4e-05
GO:0032507	maintenance of protein location in cell	26	1.1	TLN1, CAV1, NFKBIE, TLN2, PML, HK2, HK1, NFKBIA, EZR, VPS13C, GSN, TMSB15B, BCL3, TAF3, YWHAB, SUN2, SUN3, TMSB10, SHANK1, FLNB, FLNA, SYNE3, SYNE1, SYNE2, SPAG4, TMSB4X	2.3	3e-05
GO:0071526	semaphorin-plexin signaling pathway	15	0.6	NRP2, PLXNC1, PLXNA2, MET, FLNA, SEMA5A, SEMA6B, SEMA4F, SEMA7A, SEMA3E, SEMA4C, SEMA4B, SEMA3C, SEMA3A, PLXND1	3.2	1.9e-05
GO:0043410	positive regulation of MAPK cascade	91	3.9	MEF2C, PDGFA, EDN1, CSPG4, IQGAP3, PTPN22, TLR4, LPAR1, TLR6, IQGAP1, TGFB1, IL11, TGFB2, MAP3K7, SPRY2, KISS1, TNFRSF11B, NOD1, CD44, CXCR4, CTGF, SAA1, MDFIC, TIAM1, SEMA7A, ILK, PDGFC, PELI2, PAK1, PDGFD, ADAM8, FGF1, PLCB1, NRG1, EGFR, PIK3CG, IRAK2, PRKCA, ICAM1, CD40, PRKCE, SPAG9, PLCE1, CRKL, RIPK1, PDE5A, SEMA4C, NPTN, MST1R, KSR1, LRRK2, GADD45B, GADD45A, WNT5A, TNFRSF6B, CAV2, FGFR1, G…	1.5	5.4e-05
GO:1905005	regulation of epithelial to mesenchymal transition involved in endocardial cushion formation	7	0.3	NOG, TGFBR1, TGFBR2, ENG, TGFB1, ACVR1, TGFB2	6.9	3.6e-06
GO:0045778	positive regulation of ossification	25	1.1	BMP4, MEF2C, WNT5A, IL6, BMP2, CEBPB, PDLIM7, IFITM1, IL6ST, FAM20C, GJA1, SMAD3, GLI3, TGFB1, TGFB2, ACVR2B, NIPBL, OSR1, ISG15, ILK, RUNX2, ANO6, TOB2, CYR61, ACVR1	2.3	3.1e-05
GO:0032330	mesenchymal cell proliferation	17	0.7	WNT5A, BMP4, FGFR1, BMP2, IRS2, PDGFA, TGFBR2, LMNA, SIX2, STAT1, SOX9, FOXP2, SHOX2, OSR1, FAT4, SIX1, PTN	2.9	2.2e-05
GO:0010463	regulation of chondrocyte differentiation	17	0.7	BMP4, RARG, TGFBR1, EFEMP1, SIX2, SMAD3, SNAI2, SOX9, GLI3, PTHLH, ADAMTS7, SHOX2, CTGF, LNPK, ADAMTS12, LOXL2, RUNX2	2.9	2.2e-05
GO:0051253	negative regulation of RNA metabolic process	201	8.6	MEF2C, NOG, MEF2A, FST, EDN1, AURKB, FOXF2, DHX34, PTBP3, CRY1, PTPRK, RARG, RCOR1, HMG20A, UBR2, DCAF1, MECOM, UHRF1, UHRF2, PRDM5, PRDM1, TAGLN3, HEXIM1, NKX2-1, NKX2-5, BMP4, KLF5, BMP2, KLF12, KLF10, ASXL1, SMAD3, SMYD2, GAS6, NKX6-1, SHOX2, NOTCH1, IFI27, ETS2, JAZF1, SMURF2, KAT6B, ENG, KLF4, NCOR2, BACH1, CREBRF, ZNF488, PPARA, FOXA2, TBX20, PPARG, ZEB2, ZEB1, RLIM, GLI3, ZBTB38, EDNRB, BH…	1.3	6.9e-05
GO:0060333	interferon-gamma-mediated signaling pathway	24	1	ICAM1, SP100, NMI, PPARG, OAS3, PML, HLA-A, IFI30, OAS1, OAS2, HLA-B, HLA-E, STAT1, MID1, IRF9, NLRC5, OASL, CD44, TRIM8, MT2A, IRF1, JAK1, GBP2, GBP1	2.4	3.1e-05
GO:0008544	regulation of binding	62	2.6	MEF2C, PDGFA, EDN1, CSPG4, TNFSF15, IQGAP3, TLR4, LPAR1, TLR6, IQGAP1, TGFB1, MAP3K7, SPRY2, NOD1, CXCR4, TIAM1, MDFIC, SAA1, ILK, PDGFC, PAK1, PDGFD, ADAM8, FGF1, NRG1, IRAK2, PIK3CG, EGFR, PIM1, CD40, STK4, CARD10, SPAG9, PLCE1, CCND2, RIPK1, PDE5A, RGCC, ADAM17, MST1R, GADD45B, LRRK2, GADD45A, WNT5A, FGFR1, CDK5R2, ADORA2B, C5, AKAP13, TRAF6, THBS1, FZD8, BMP2, ITGA1, FZD4, PTPN11, AJUBA, DUSP…	1.6	5e-05
GO:0051098	positive regulation of protein serine/threonine kinase activity	62	2.6	PPARA, FOSL2, PDGFA, MYO7A, FST, CRABP2, LATS2, TGFB2, AKR1C3, MCOLN3, CTGF, HPSE, PLOD3, YAP1, ERRFI1, ZFP36, EGFR, SATB1, ROCK1, ROCK2, UGCG, FLNB, STK4, PTHLH, INHBA, EREG, NCOA3, KRT16, CLIC4, KRT15, LAMC2, SLITRK6, EMP1, WNT5A, FGFR1, SFN, SOX9, ZFP36L1, FOXQ1, LAMB3, COL17A1, COL7A1, SOS1, CYP26B1, PAFAH1B1, MYSM1, ERCC2, BMP4, MAFF, ANXA1, CELSR1, KRT34, GORAB, EPHA2, ATP7A, NOTCH1, DKK1, …	1.6	5e-05
GO:0071902	epidermis development	62	2.6	MEF2C, PPARA, NOG, RSF1, MMP9, AURKA, AURKB, MITD1, TGFB1, GTSE1, TGFB2, TMEM173, DAB2, BDNF, TIAM1, GATA3, TRIM6, NRG1, SP100, ROCK1, LEF1, RB1, IFI16, HMGA2, STK4, PLAUR, SPAG9, LRRK2, CARM1, CSF3, WNT5A, BTAF1, CAV1, HFE, NFKBIA, TCF7L2, LIF, PLCL2, WAPL, HJURP, BCL3, TRAF6, PLXND1, ERCC2, BMP4, TAF1, NES, BMP2, TMC8, TGFBR1, ITGA2, SMAD3, S100A10, ANXA2, EPHA4, IFIT2, IFIT1, DKK1, CSNK1E, ID1…	1.6	5e-05
GO:0007249	I-kappaB kinase/NF-kappaB signaling	55	2.3	S100A4, PTGS2, SLC20A1, ZC3HAV1, IL18, TLR2, GJA1, TLR4, RORA, LPAR1, TLR6, MAP3K7, NOV, NOD1, TRIM8, CASP8, PELI2, TNIP1, CHUK, IRAK2, ROCK1, BST2, LY96, ROCK2, RELB, OPTN, CD40, PRKCE, NLRP3, ECT2, TANK, FLNA, CARD11, RIPK1, TNFAIP3, GSTP1, AKAP13, NFKBIA, PLEKHG5, TGM2, BCL3, TRAF6, TRAF5, PELI1, CARD8, IL1RL1, LGALS1, SPHK1, BIRC3, STAT1, ECM1, AJUBA, CASP10, FYN, TRIP6	1.7	4.9e-05
GO:0043901	negative regulation of multi-organism process	38	1.6	MICB, ZC3HAV1, IFITM1, IFITM2, IFITM3, OAS3, PML, OAS1, APOBEC3C, SEC14L1, APOBEC3D, ACVR1C, ISG20, TIMP1, SHB, ISG15, TRIM8, GSN, HTRA1, TRIM6, ITGAV, PTX3, TNIP1, DHX58, ARHGDIB, ZFP36, SP100, BST2, NPR2, IFI16, STAT1, HMGA2, SRPK1, PLSCR1, IFIT1, OASL, PRDM1, TNFAIP3	1.9	4.6e-05
GO:0007088	regulation of mitotic nuclear division	35	1.5	CAV2, SLF2, BORA, EDN1, TTK, ANLN, AURKA, TGFB1, PHIP, MTBP, BUB1, FBXO43, OBSL1, TPR, BUB3, APC, BMP4, CEP85, KIF11, MKI67, DLGAP5, CENPF, ESPL1, CENPE, RB1, UBE2C, CDC27, ATM, ATRX, DUSP1, EREG, RGCC, KIF20B, PDCD6IP, CCDC8	2	4.4e-05
GO:0045995	regulation of embryonic development	31	1.3	WNT5A, FGFR1, PPP2R3A, FOXA2, NR2C2, NOCT, NIPBL, OSR1, GATA3, PAFAH1B1, PLCB1, BMP4, HES7, CELSR1, SIX4, FZD2, GORAB, MYADM, STK4, COL5A1, FZD7, LAMA2, NOTCH1, DKK1, LAMA5, SIX1, RBM19, NFE2L2, PHLDB2, KLF4, DUSP6	2.1	4.3e-05
GO:0007009	plasma membrane organization	58	2.5	LYPD1, TSPAN5, TGFB1, TGFB2, DAB2, ANK1, DYSF, ANK2, CXCR4, ANO6, GOLGA4, RHOG, PID1, RAP2A, KIF5B, ROCK1, STX2, TTC7A, ROCK2, C2CD5, ACTN2, OPTN, MYADM, FLNA, MYRF, CLIP1, GBP1, SNX9, CAV2, CAV1, ITGB1, EZR, MACF1, FAT4, SH3GLB1, EFR3A, AHNAK2, NDRG1, SH3TC2, FCHO2, EHD2, MYOF, A4GALT, S100A10, ITGA3, GAS6, EPHA2, COL5A1, ANXA2, PLSCR1, RAB31, PLSCR4, LAMA5, RAB34, PLSCR3, SPTBN1, SMURF1, SNX33	1.7	5.9e-05
GO:0045621	positive regulation of lymphocyte differentiation	24	1	IL6, IL18, TGFBR2, ANXA1, AXL, NCKAP1L, IL15, IL7R, NLRP3, MMP14, GLI3, GAS6, TGFB1, FLT3LG, SHB, CD83, HLX, GATA3, IL4R, IL12A, IL15RA, PRDM1, ADAM8, AP3B1	2.4	3.8e-05
GO:0061024	membrane organization	170	7.3	RAB3GAP2, SYT1, LYPD1, TSPAN5, PMAIP1, TGFB1, TGFB2, DMPK, NRCAM, DAB2, DYSF, ANK1, MALL, ANK2, TIAM1, RAE1, RABGEF1, EGFR, PID1, TTC7A, ROCK1, KIF5B, PLD6, ROCK2, C2CD5, BCL2A1, MFGE8, ACTN2, OPTN, MYH9, LPCAT2, DCTN1, NPC1, SPAG4, CATSPER1, CLIP1, PDCD6IP, ANKFY1, GBP1, SNX9, CAV2, CAV1, ITGB2, HSPA1A, ABCA1, ITGB1, ZMYND8, TRAM2, DOCK2, MACF1, NUP50, EFR3A, AHNAK2, NDRG1, AGRN, STX11, SH3TC2, …	1.3	8.4e-05
GO:0071260	cellular response to mechanical stimulus	22	0.9	EGFR, SLC38A2, PTGS2, PTGER4, GJA1, ITGA2, TLR4, ANKRD1, CD40, SOX9, AQP1, TGFB1, CYBA, PDE2A, CASP8AP2, BAG3, MAP3K1, CASP8, IRF1, CNN2, ENG, GADD45A	2.5	3.7e-05
GO:0071383	cellular response to steroid hormone stimulus	52	2.2	CREBRF, PPARA, PPARG, EDN1, RORA, AQP1, TGFB1, KANK2, AKR1C3, ATP2B1, DAB2, PAK1, CRY1, ERRFI1, NR2F1, ZFP36, EGFR, RBFOX2, RARG, MED12, LEF1, ARNTL, RB1, HMGA2, DDIT4, NPC1, NCOA3, SERPINF1, STC1, TGFB1I1, CARM1, GSTP1, FHL2, PAQR7, PAQR8, NR3C1, NR2C2, PAQR5, ZFP36L1, ZFP36L2, NR1D1, KDM3A, BMP4, TAF1, IL6, ATP1A3, ANXA1, NR4A2, CYP7B1, MED30, NEDD4, FBXO32	1.7	6.2e-05
GO:0051641	cellular localization	379	16.2	TGOLN2, MEF2C, LYPD1, SYT1, KIFC1, RAB3GAP2, MEF2A, LTBP2, PTGS2, PTPN22, AURKA, RANGAP1, AURKB, NOV, MEI1, BDNF, MALL, GAB2, VPS13C, RAE1, RAB23, CEP290, HTR1D, PIK3CG, PTPRK, TTC7A, KIF5B, ROCK1, ROCK2, UGCG, ESPL1, OPTN, GEM, MYH9, DCTN1, SPAG9, NPC1, UNC13D, SPAG4, NPTN, TBC1D8B, KIF4A, NFKBIE, AKAP12, NFKBIA, AKAP13, HFE, RIMS2, LIF, SEMA5A, TRAM2, RAC2, HNMT, MACF1, UBASH3B, NUP50, EFR3A, O…	1.2	9.9e-05
GO:0042493	response to drug	79	3.4	MEF2C, XPO1, PTGS2, PPARG, EDN1, ANKRD1, AQP1, TGFB1, TGFB2, TNFRSF11B, PDE4A, GATA3, PDE4B, SEMA3C, SLC22A3, RNF149, LOX, HTR1D, CCNO, FOSL1, PMS1, CHUK, EGFR, ICAM1, RAP2A, HSP90AA1, FBP1, RPH3AL, PAPD7, FOSB, HMGA2, JUNB, PPM1F, VEGFC, INHBA, NPC1, CA9, ADAM17, NFE2L2, PRNP, PAM, KMT2A, TIMP4, ABCA1, TIMP2, PFAS, PLIN2, PPP1R12A, PTN, THBS1, NFATC2, GAD1, TMEM30A, COL18A1, IL6, ACTC1, GNAO1, L…	1.5	7.2e-05
GO:0072577	endothelial cell apoptotic process	17	0.7	COL18A1, ICAM1, CD40, NDNF, GAS6, IL11, SEMA5A, AKR1C3, GATA3, SERPINE1, RGCC, NFE2L2, THBS1, TNFAIP3, ANO6, ANGPTL4, SCG2	2.9	3.1e-05
GO:0045088	regulation of innate immune response	71	3	PVR, ZC3HAV1, BTRC, PPARG, TLR2, PTPN22, TLR4, TLR6, MAP3K7, CD96, NLRC5, TMEM173, NOD1, TRIM6, DDX60, CASP8, PAK1, ADAM8, TNIP1, CHUK, CEACAM1, COCH, IRAK2, GBP5, LY96, SOCS3, ICAM2, RELB, HLA-A, HLA-B, IFI16, CTSS, HLA-E, RFTN1, PRKCE, TANK, CARD11, EREG, MB21D1, RIPK1, IL12A, TNFAIP3, WNT5A, CAV1, IFIH1, NMI, NFKBIA, ITGB2, HSPA1A, SEC14L1, IRAK3, NR1D1, MAP3K1, TRAF6, DHX58, PELI1, ERBIN, SAM…	1.6	7.2e-05
GO:0032870	cellular response to hormone stimulus	110	4.7	MEF2C, ADCY7, EDN1, RANGAP1, RORA, AQP1, TGFB1, KANK2, ATP2B1, DAB2, PLOD3, PIK3CA, OGT, CRY1, PID1, EGFR, RBFOX2, IRS2, RARG, C2CD5, SOCS3, MED12, ACTN2, ARNTL, IRS1, JUNB, DDIT4, NPC1, SERPINF1, STC1, TGFB1I1, CAV2, CAV1, PAQR7, PAQR8, NR2C2, PAQR5, PTK2, BMP4, TAF1, NR4A2, NKX6-1, PTPN11, CYP7B1, NOTCH1, UCP2, NEDD4, FBXO32, HDAC9, CREBRF, PPARA, CPEB2, IGFBP7, LEPR, PPARG, FER, LATS2, AKR1C3,…	1.4	8.1e-05
GO:0010977	negative regulation of neuron projection development	33	1.4	WNT5A, VIM, ASAP1, LPAR1, EPHB2, SEMA5A, PTK2, SEMA7A, BCL11A, SEMA3E, INPP5F, SEMA3C, IL15RA, PAFAH1B1, SEMA3A, NR2F1, DNM3, ARHGEF1, PTPRG, LGALS1, NLGN3, SLIT2, EPHA4, MAP4K4, SEMA6B, LRP1, ID1, SEMA4F, SEMA4C, SEMA4B, PMP22, CARM1, LRP4	2	5.2e-05
GO:0060688	regulation of morphogenesis of a branching structure	18	0.8	WNT5A, BMP4, FGFR1, NOG, PDGFA, NTN4, SIX2, SIX4, SNAI2, SOX9, TGFB1, SHOX2, TACSTD2, PAX8, SIX1, LRRK2, ETV5, ETV4	2.7	3.6e-05
GO:0048144	fibroblast proliferation	25	1.1	WNT5A, S100A6, FOSL2, PDGFA, PPARG, PML, IFI30, PMAIP1, PAWR, AQP1, TGFB1, WAPL, PDGFC, PDGFD, FN1, EGFR, SPHK1, CDK6, LIG4, DACH1, GAS6, ANXA2, SOD2, EREG, GSTP1	2.3	4.7e-05
GO:0097529	myeloid leukocyte migration	38	1.6	CXCL1, CSF1, CXCL3, C5, EDN1, CXCL2, CXCL8, ITGB2, IL17RA, CCL26, TGFB2, NOV, CCL24, EDNRB, HRH1, RAC2, SAA1, PDE4B, SERPINE1, PDGFD, PLCB1, THBS1, ADAM8, ANO6, SCG2, PIK3CG, IL6, MPP1, PTGER4, LGALS3, SWAP70, ANXA1, ITGA1, NCKAP1L, PDE4D, SLIT2, VEGFC, CAMK1D	1.9	6.2e-05
GO:0035148	tube formation	35	1.5	DLC1, WNT5A, SDCCAG8, NOG, LUZP1, SDC4, SOX9, MTHFD1L, TGFB1, TGFB2, OSR1, GATA3, PAX8, TGM2, TRAF6, IPMK, BMP4, RARG, PODXL, MED12, TEAD2, CELSR1, SIX4, FZD2, STK4, VASP, MIB1, NOTCH1, PRICKLE1, ADM, SIX1, SEMA4C, KIF20B, APAF1, SETD2	2	6.1e-05
GO:0014909	smooth muscle cell migration	19	0.8	PLAT, ITGA2, LPAR1, ITGB3, DOCK5, IQGAP1, SLIT2, DOCK4, NOV, LRP1, SERPINE1, ILK, HAS2, NFE2L2, PDGFD, IGFBP3, PLAU, GSTP1, PARVA	2.6	4.1e-05
GO:0045089	positive regulation of innate immune response	60	2.6	PVR, ZC3HAV1, BTRC, TLR2, PTPN22, TLR4, TLR6, MAP3K7, NLRC5, TMEM173, NOD1, TRIM6, DDX60, CASP8, PAK1, ADAM8, TNIP1, CHUK, COCH, IRAK2, GBP5, LY96, ICAM2, RELB, IFI16, CTSS, RFTN1, PRKCE, HLA-E, TANK, CARD11, EREG, MB21D1, RIPK1, IL12A, TNFAIP3, WNT5A, CAV1, IFIH1, NFKBIA, HSPA1A, ITGB2, SEC14L1, IRAK3, NR1D1, MAP3K1, TRAF6, DHX58, PELI1, ERBIN, BIRC3, PSMB8, PSMB9, DDX58, CYBA, PLSCR1, FYN, PLCG…	1.6	7.8e-05
GO:0048863	stem cell differentiation	27	1.2	POU6F2, SOX9, TGFB2, LIF, ZFP36L2, OSR1, TRIM6, YAP1, NRG1, NKX2-5, RUNX2, ETV4, SHC4, ERCC2, ZNF281, JARID2, CDK6, HMGA2, HHEX, NOTCH1, PHF19, PRICKLE1, TACSTD2, HOXD4, FOXC1, NFE2L2, SETD2	2.2	5.4e-05
GO:0043254	regulation of protein complex assembly	74	3.2	ZNF451, TBX20, ARHGAP18, TLR4, FER, PMAIP1, TLR6, MMP1, TGFB1, SETX, ACTR2, GSN, TRIM9, TMSB15B, MSN, FOSL1, KIF14, ATF7IP, ICAM1, STX1A, GBP5, HSP90AA1, PTGER4, TRABD2A, DDB1, FBLIM1, TMSB10, PRKCE, MYADM, VASP, SLIT2, DCTN1, EML2, FMN1, FCHSD2, FHOD3, CLIP1, TMSB4X, FCHSD1, CSF3, SNX9, CSF2, SLF2, ABI2, CCL26, CCL24, CDC42EP2, CDC42EP1, SH3GLB1, HJURP, BCL11A, XAF1, WIPF1, NKX2-5, CDC42EP3, RAS…	1.5	8.5e-05
GO:0032612	interleukin-1 production	22	0.9	WNT5A, EGR1, CARD8, GBP5, GSDMD, SPHK1, PML, SMAD3, TLR4, IFI16, ABCA1, NLRP3, TLR6, GAS6, NLRP1, S1PR3, NOD1, SAA1, TNFAIP3, ERRFI1, CEACAM1, GSTP1	2.4	4.7e-05
GO:0061572	actin filament bundle organization	33	1.4	DLC1, LIMA1, PAWR, LPAR1, SDC4, ITGB1, S1PR1, EZR, CTGF, ZYX, PAK1, PLS3, SYNPO, PHACTR1, PTGER4, ACTN4, ROCK1, MYO1B, SWAP70, ROCK2, TGFBR1, ALMS1, S100A10, ACTN1, SMAD3, SHANK1, ARHGEF10, PPM1F, EPS8, ID1, TACSTD2, RGCC, PHLDB2	2	6.2e-05
GO:0034333	adherens junction assembly	21	0.9	DLC1, PTPRK, ROCK1, FERMT2, SMAD3, ITGA2, S100A10, ACTN1, ACTN2, MMP14, SDC4, IQGAP1, VCL, AJUBA, PPM1F, FMN1, CORO1C, LAMA5, THBS1, TRIP6, PHLDB2	2.5	4.6e-05
GO:0050808	synapse organization	50	2.1	MEF2C, DMPK, NRCAM, BDNF, IL1RAP, SEMA3E, DLG4, NRG1, PCDHB9, PCDHB2, SIX4, FARP1, AMIGO2, SIX1, C1QL1, NPTN, SLITRK6, LRRK2, SLITRK5, WNT5A, ZC4H2, TNC, CACNB1, PCDHGC5, CACNB4, PCDHB11, ZMYND8, EPHB2, PTK2, DNER, PCDHB16, PTN, AGRN, PLXND1, ETV5, IL1RAPL1, FLRT3, DNM3, FLRT2, GLRB, COL4A1, NLGN2, NLGN3, SHANK1, TPBG, DKK1, SRPX2, NEDD4, CHRNB1, LRP4	1.7	7.8e-05
GO:0030162	regulation of proteolysis	123	5.3	DLC1, CAST, FHIT, MMP9, BTRC, LTBP4, TNFSF15, RNF217, AURKA, PMAIP1, AQP1, CFP, DAB2, PICALM, CD44, SERPINE2, CASP8AP2, CTGF, ROBO1, CDKN2D, CCBE1, SERPINE1, CFH, OGT, DAP, ASPH, ADAM8, PI16, TFPI2, AKIRIN2, WFDC10B, BST2, CST1, SOCS4, MYH9, TANK, PCOLCE2, PLAUR, SERPINF1, MELTF, ANXA8L1, F3, CST4, ANOS1, OPHN1, NFE2L2, LRRK2, WFDC2, WFDC3, SNX9, CAV1, HFE, GSAP, HSPA1A, TIMP4, TIMP2, SERPINH1, T…	1.4	0.00011
GO:0090316	positive regulation of intracellular protein transport	54	2.3	PTGS2, XPO4, IL18, TLR2, PTPN22, TLR4, GLI3, GTSE1, TGFB1, TMEM173, DAB2, NBPF3, CEP290, ASPH, TPR, NRG1, EGFR, HSP90AA1, KIF5B, C2CD5, ZDHHC8, UGCG, ECT2, FLNA, STOM, HHAT, CSF3, ABLIM3, PPP3R1, SFN, TCF7L2, SEMA5A, HNMT, RAC2, SH3GLB1, MTCL1, TMEM30A, BMP4, IL6, TGFBR1, HCLS1, SPHK1, SMAD3, PRR5L, GAS6, DDX58, PLK3, ICE1, MAPK14, KIF20B, TCAF2, TCAF1, TRIP6, SLC17A9	1.7	8.5e-05
GO:0071229	cellular response to acid chemical	39	1.7	MEF2C, WNT5A, WNT5B, LDLR, TNC, PPARG, EDN1, ZEB1, ABCA1, AQP1, SOX9, SETX, AKR1C3, BRINP2, OSR1, PTK6, CYP26B1, PDGFC, YAP1, PDGFD, OGT, PID1, EGFR, MUC1, LTK, RARG, CEBPB, COL4A1, PDK4, TEAD2, UBR2, CAPN2, FZD4, FZD7, CYBA, SERPINF1, DNMT1, ABL2, KLF4	1.9	7.4e-05
GO:0048145	regulation of fibroblast proliferation	25	1.1	WNT5A, S100A6, FOSL2, PDGFA, PPARG, PML, IFI30, PMAIP1, PAWR, AQP1, TGFB1, WAPL, PDGFC, PDGFD, FN1, EGFR, SPHK1, CDK6, LIG4, DACH1, GAS6, ANXA2, SOD2, EREG, GSTP1	2.3	5.8e-05
GO:0042476	odontogenesis	30	1.3	PAM, PPARA, CSF1, TNC, EDN1, FAM20C, ITGB4, HACD1, AQP1, GLI3, TGFB1, TGFB2, TNFRSF11B, OSR1, HTRA1, TRAF6, LAMB1, RUNX2, BMP4, BMP2, LEF1, ZNF22, INHBA, ACVR2B, ITGA6, ADM, LAMA5, FOXC1, CA2, LRP4	2.1	6.5e-05
GO:0010721	negative regulation of cell development	62	2.6	NOG, FOXA2, LPAR1, GLI3, TGFB1, TGFB2, SHB, S1PR3, EDNRB, SEMA7A, SEMA3E, IL15RA, SEMA3C, SEMA3A, NRG1, ASPM, NR2F1, GPR173, ARHGEF2, ARHGEF1, ACTN4, PTPRG, HMG20A, HMGA2, SLIT2, MIB1, MAP4K4, MELTF, TACSTD2, SEMA4F, SEMA4C, SEMA4B, PMP22, CARM1, GBP1, WNT5A, VIM, ASAP1, SOX9, EPHB2, SEMA5A, PTK2, BCL11A, INPP5F, NKX2-1, PTN, PAFAH1B1, DNM3, LGALS1, FBN1, NPR2, NLGN3, STAT1, NKX6-1, CORO1C, EPHA4…	1.6	9.1e-05
GO:2000113	negative regulation of cellular macromolecule biosynthetic process	211	9	MEF2C, NOG, MEF2A, FST, EDN1, AURKB, FOXF2, CRY1, PTPRK, RARG, RCOR1, HMG20A, UBR2, DCAF1, MECOM, UHRF1, UHRF2, PRDM5, PRDM1, IGF2BP2, IGF2BP3, TAGLN3, HEXIM1, NKX2-1, NKX2-5, BMP4, KLF5, BMP2, KLF12, KLF10, ASXL1, SMAD3, SMYD2, NKX6-1, GAS6, SHOX2, NOTCH1, IFI27, ETS2, JAZF1, SMURF2, KAT6B, ENG, KLF4, NCOR2, BACH1, CREBRF, ZNF488, PPARA, FOXA2, CPEB2, TBX20, PPARG, GJA1, ZEB2, ZEB1, RLIM, GLI3, …	1.3	0.00012
GO:0003170	heart valve development	15	0.6	BMP4, MEF2C, BMP2, TBX20, TGFBR2, SOX9, TGFB1, TGFB2, SHOX2, NOTCH2, NOTCH1, GATA3, PRDM1, ACVR1, CYR61	3.1	3.9e-05
GO:0035850	epithelial cell differentiation involved in kidney development	15	0.6	MEF2C, LIF, BMP4, NOTCH1, OSR1, FAT4, PODXL, GATA3, MYO1E, PAX8, YAP1, BASP1, WWTR1, STAT1, IQGAP1	3.1	3.9e-05
GO:0070663	regulation of leukocyte proliferation	46	2	MEF2C, IL6ST, SLC39A10, IL18, CSF1, PTPN22, TLR4, IL15, PAWR, SDC4, TGFB1, FLT3LG, RAC2, CLCF1, SOS1, TRAF6, NFATC2, EBI3, BMP4, IL6, PELI1, IRS2, CEBPB, LGALS3, BST1, ANXA1, HLA-A, NCKAP1L, ATAD5, CD40, HLA-E, AHR, ATM, PDCD1LG2, CARD11, CD55, CORO1A, CD59, CD274, PDE5A, IL12A, IRF1, PRDM1, PRNP, TNFAIP3, GSTP1	1.8	8.6e-05
GO:0003205	cardiac chamber development	37	1.6	MEF2C, WNT5A, NOG, LTBP1, TBX20, FHL2, LUZP1, C5ORF42, TGFB1, TGFB2, ANK2, GATA3, SOS1, HEG1, SEMA3C, PLXND1, NRG1, PCSK5, NKX2-5, CYR61, BMP4, TGFBR1, TGFBR2, FZD2, PPP1R13L, SHOX2, NOTCH2, ADAMTS6, NOTCH1, XIRP2, FOXC1, PRDM1, LRP2, RBM15, ENG, PARVA, ACVR1	1.9	7.9e-05
GO:0032495	response to muramyl dipeptide	9	0.4	NOTCH1, ARHGEF2, NOD1, MAPK14, ERBIN, NFKBIA, PTPN22, TNFAIP3, NLRP1	4.8	1.9e-05
GO:0035265	organ growth	34	1.5	MEF2C, FGFR1, NOG, LEPR, TBX20, EDN1, GJA1, WWC2, SOX9, TGFB2, SPRY2, PTK2, S1PR1, COL27A1, HLX, HEG1, YAP1, NRG1, NKX2-5, PLAG1, RARG, TGFBR1, TGFBR2, BASP1, STK4, PTPN11, NOTCH1, ACVR2B, PRLR, MAPK14, STC1, FOXC1, CARM1, DUSP6	2	7.8e-05
GO:0048639	positive regulation of developmental growth	38	1.6	MEF2C, FGFR1, SYT1, TNFRSF12A, TRPV2, CSF1, TBX20, CRABP2, EDN1, L1CAM, RIMS2, CDH4, SEMA5A, BDNF, NIPBL, EZR, MACF1, SEMA7A, HLX, BCL11A, ILK, SOX15, PAFAH1B1, AGRN, YAP1, NRG1, PLCB1, GOLGA4, FN1, CPNE5, TGFBR2, MAP1B, BASP1, HMGA2, NOTCH1, MAPK14, SMURF1, SYT17	1.9	8.2e-05
GO:0071384	cellular response to corticosteroid stimulus	19	0.8	ZFP36, CREBRF, EGFR, IL6, EDN1, ANXA1, NR3C1, AQP1, TGFB1, DDIT4, AKR1C3, ATP2B1, ZFP36L1, ZFP36L2, SERPINF1, FBXO32, STC1, ERRFI1, GSTP1	2.6	5.3e-05
GO:0032652	ventricular septum development	20	0.9	WNT5A, BMP4, NOG, LTBP1, TGFBR1, TGFBR2, LUZP1, FZD2, C5ORF42, TGFB2, NOTCH1, XIRP2, GATA3, HEG1, PRDM1, LRP2, NKX2-5, RBM15, ACVR1, CYR61	2.5	5.7e-05
GO:0003281	regulation of interleukin-1 production	20	0.9	WNT5A, EGR1, CARD8, GSDMD, SPHK1, ANXA1, PML, SMAD3, TLR4, IFI16, NLRP3, GAS6, NLRP1, S1PR3, NOD1, SAA1, TNFAIP3, ERRFI1, CEACAM1, GSTP1	2.5	5.7e-05
GO:0051261	protein depolymerization	26	1.1	FRAS1, NOG, ADAMTS16, SOX9, GLI3, TGFB1, LIF, OSR1, FAT4, WNK4, GATA3, PAX8, ILK, FGF1, BMP4, BMP2, SIX2, SIX4, BASP1, WWTR1, STAT1, FMN1, LAMA5, TACSTD2, SIX1, LRRK2	2.2	6.8e-05
GO:0060993	kidney morphogenesis	26	1.1	KIF14, LIMA1, NES, ARHGEF2, KIF24, STMN3, APC2, SWAP70, MICAL2, SYNJ1, KIF18A, KIF18B, ACTN2, MID1, SEMA5A, EPS8, GSN, PLEKHH2, CFL2, CAPG, SPTBN1, DNAJC6, TMOD3, SH3BGRL3, APC, SPTAN1	2.2	6.8e-05
GO:0048285	organelle fission	110	4.7	KIFC1, PRC1, EDN1, TTK, AURKA, AURKB, TGFB1, MEI1, RAD21, INCENP, CCNA1, MX2, ASPM, STAG1, CEP85, PLD6, ESPL1, UBR2, GEM, DCTN1, SGO2, SGO1, RGCC, CLIP1, PDCD6IP, CCDC8, WNT5A, SNX9, CAV2, PAM, KIF4A, SLF2, CEP164, ANLN, LIF, WAPL, NIPBL, FBXO43, OBSL1, HELLS, ERCC6L, BMP4, MKI67, CKAP5, BRCA2, PIBF1, SPDL1, MISP, CDC27, ATM, EPS8, KIF23, BORA, LATS2, OFD1, ACTR2, MTBP, MASTL, TPR, PLCB1, FANCA, …	1.4	0.00012
GO:0050867	positive regulation of cell activation	64	2.7	MEF2C, IL6ST, IL18, PTPN22, TLR4, IL15, GLI3, TGFB1, FLT3LG, MAP3K7, SHB, HSPH1, GAB2, CLCF1, CTGF, GATA3, IL4R, HLX, IL15RA, SOX15, PIK3CA, PAK1, ADAM8, EBI3, AP3B1, IRS2, BST1, EFNB2, HLA-A, CD40, NLRP3, HLA-E, MMP14, PDCD1LG2, CARD11, CD83, IL12A, PRDM1, WNT5A, CAV1, ADORA2B, SLC39A10, IL7R, STAT6, TRAF6, NFATC2, THBS1, PELI1, IL6, IL1RL1, LGALS1, TGFBR2, AXL, ANXA1, NCKAP1L, ATAD5, RICTOR, GA…	1.6	0.00011
GO:0072175	epithelial tube formation	32	1.4	WNT5A, PTGS2, C3, C5, CXCL8, ITGB2, TNFSF12, AQP1, SEMA5A, CCL24, CCBE1, SERPINE1, RUNX1, FGF1, THBS1, ANGPTL4, PRKCA, TGFBR2, SPHK1, ECM1, ANXA3, VEGFC, ADM, SRPX2, ETS1, ITGA5, F3, TBXA2R, JAK1, NFE2L2, HDAC9, ENG	2	7.9e-05
GO:0045766	positive regulation of angiogenesis	32	1.4	DLC1, WNT5A, NOG, LUZP1, SOX9, SDC4, MTHFD1L, TGFB1, TGFB2, OSR1, GATA3, PAX8, TRAF6, IPMK, BMP4, RARG, PODXL, MED12, TEAD2, CELSR1, SIX4, FZD2, STK4, VASP, MIB1, PRICKLE1, ADM, SIX1, SEMA4C, KIF20B, APAF1, SETD2	2	7.9e-05
GO:0009306	protein secretion	87	3.7	STEAP3, FOXA2, LTBP2, ANO1, TLR2, PTPN22, GJA1, TLR4, ANKRD1, TLR6, CANX, TGFB1, IL17RA, ACVR1C, TGFB2, NOV, SAA1, TIAM1, GATA3, TRIM6, IL4R, SLC2A1, IL1RAP, RABGEF1, RAPGEF4, ADAM8, EGFR, PRKCA, IRS2, STX1A, GBP5, KIF5B, PTGER4, RPH3AL, CD40, ARNTL, NLRP3, HLA-E, PRKCE, IRS1, NLRP1, MAP4K4, VEGFC, RAB11FIP5, ACVR2B, RGCC, PAEP, SSC5D, GBP1, WNT5A, C5, GSDMD, PML, ABCA1, RIMS2, TCF7L2, EZR, NR1D1…	1.5	0.00012
GO:0042107	cytokine metabolic process	28	1.2	WNT5A, NMI, IL18, TNFSF15, TLR4, PAWR, TLR6, TRIB2, NOD1, IL1RAP, BCL3, THBS1, TRAF6, PCSK5, ERRFI1, LTB, EBI3, EGR1, ZFP36, IL6, CEBPB, INHBA, CARD11, MAST4, EREG, IRF1, ASB1, KLF4	2.1	7.5e-05
GO:0003230	cardiac atrium development	14	0.6	WNT5A, NOG, TBX20, TGFB2, SHOX2, NOTCH2, NOTCH1, ANK2, SOS1, HEG1, ENG, NKX2-5, ACVR1, CYR61	3.2	4.2e-05
GO:2000826	regulation of heart morphogenesis	14	0.6	BMP4, NOG, BMP2, TGFBR1, TGFBR2, SOX9, TGFB1, TGFB2, NOTCH1, DKK1, SIX1, FOXC1, ENG, ACVR1	3.2	4.2e-05
GO:0050778	positive regulation of immune response	119	5.1	PVR, MEF2C, MICB, ZC3HAV1, IL6ST, IL18, BTRC, TLR2, PTPN22, TLR4, IL15, TLR6, TGFB1, TGFB2, CFP, MAP3K7, SHB, NLRC5, GAB2, GATA3, SEMA7A, PDE4B, CFH, PIK3CA, ADAM8, COCH, GBP5, RELB, HLA-A, PDE4D, HLA-B, CD40, HLA-E, TANK, RGCC, TNFAIP3, GBP1, WNT5A, CAV1, IFIH1, ADORA2B, NFKBIA, HSPA1A, ITGB2, IRAK3, PTK2, TRAF6, DHX58, PELI1, LGALS3, CFB, ERBIN, NCKAP1L, ATAD5, PSMB8, PSMB9, NCKAP1, DDX58, MYO1…	1.4	0.00013
GO:1903901	negative regulation of viral life cycle	25	1.1	IFITM1, ZC3HAV1, IFITM2, IFITM3, OAS3, PML, OAS1, APOBEC3C, APOBEC3D, ISG20, TRIM8, ISG15, GSN, TRIM6, PTX3, TNIP1, ZFP36, SP100, BST2, IFI16, HMGA2, SRPK1, PLSCR1, IFIT1, OASL	2.2	7.1e-05
GO:0051051	negative regulation of transport	84	3.6	CTTNBP2NL, PTGS2, MMP9, EDN1, PTPN22, SPINK1, RANGAP1, TGFB1, IL11, ACVR1C, NOV, GSTM2, PICALM, OSR1, SERPINE2, TRIM9, MDFIC, WNK4, DLG4, RABGEF1, RAB23, TPR, NRG1, CRY1, CEACAM1, PID1, ICAM1, IRS2, SP100, BST2, PTGER4, ACTN2, NLRP3, PRKCE, IRS1, PKIA, MAP4K4, RAB11FIP5, INHBA, RGCC, GNB5, STC1, LRRK2, SSC5D, GBP1, CAV1, APC2, NFKBIE, PML, NFKBIA, HSPA1A, ITGB3, PXK, LIF, EZR, ITGAV, PCSK9, CNN2,…	1.5	0.00012
GO:0045927	positive regulation of growth	52	2.2	MEF2C, SYT1, TRPV2, TBX20, CRABP2, EDN1, L1CAM, TGFB2, BDNF, HLX, SEMA7A, ILK, SOX15, YAP1, NRG1, PLCB1, GOLGA4, EGFR, NOL8, LEF1, BASP1, MMP14, HMGA2, PPM1F, ADAM17, FGFR1, TNFRSF12A, CSF1, SFN, RIMS2, CDH4, SEMA5A, NIPBL, EZR, MACF1, BCL11A, PAFAH1B1, AGRN, ACSL4, FN1, CPNE5, TGFBR1, SPHK1, MAP1B, TGFBR2, CYBA, NOTCH1, MAPK14, HBEGF, SMURF1, IGFBP1, SYT17	1.7	0.00011
GO:0030193	regulation of hemostasis	24	1	PRKCA, PLAT, CAV1, FOXA2, STX2, PDGFA, EDN1, TLR4, FAM46A, ANXA2, PLAUR, THBD, SERPINE2, HPSE, UBASH3B, F3, SERPINE1, TBXA2R, NFE2L2, THBS1, ANO6, PROS1, CEACAM1, PLAU	2.3	7.3e-05
GO:1900046	regulation of blood coagulation	24	1	PRKCA, PLAT, CAV1, FOXA2, STX2, PDGFA, EDN1, TLR4, FAM46A, ANXA2, PLAUR, THBD, SERPINE2, HPSE, UBASH3B, F3, SERPINE1, TBXA2R, NFE2L2, THBS1, ANO6, PROS1, CEACAM1, PLAU	2.3	7.3e-05
GO:0046718	entry into other organism involved in symbiotic interaction	29	1.2	PVR, CAV2, CAV1, IFITM1, LDLR, IFITM2, IFITM3, HSPA1A, ITGB3, ITGB1, SLC1A5, TRIM8, CXCR4, GSN, ITGAV, PTX3, SELPLG, ICAM1, NUP153, LGALS1, EFNB2, AXL, ITGA2, GAS6, NPC1, CD55, LAMP3, ITGA5, KPNA3	2.1	8.4e-05
GO:0051828	entry into cell of other organism involved in symbiotic interaction	29	1.2	PVR, CAV2, CAV1, IFITM1, LDLR, IFITM2, IFITM3, HSPA1A, ITGB3, ITGB1, SLC1A5, TRIM8, CXCR4, GSN, ITGAV, PTX3, SELPLG, ICAM1, NUP153, LGALS1, EFNB2, AXL, ITGA2, GAS6, NPC1, CD55, LAMP3, ITGA5, KPNA3	2.1	8.4e-05
GO:0030260	viral entry into host cell	29	1.2	PVR, CAV2, CAV1, IFITM1, LDLR, IFITM2, IFITM3, HSPA1A, ITGB3, ITGB1, SLC1A5, TRIM8, CXCR4, GSN, ITGAV, PTX3, SELPLG, ICAM1, NUP153, LGALS1, EFNB2, AXL, ITGA2, GAS6, NPC1, CD55, LAMP3, ITGA5, KPNA3	2.1	8.4e-05
GO:0044409	entry into host	29	1.2	PVR, CAV2, CAV1, IFITM1, LDLR, IFITM2, IFITM3, HSPA1A, ITGB3, ITGB1, SLC1A5, TRIM8, CXCR4, GSN, ITGAV, PTX3, SELPLG, ICAM1, NUP153, LGALS1, EFNB2, AXL, ITGA2, GAS6, NPC1, CD55, LAMP3, ITGA5, KPNA3	2.1	8.4e-05
GO:0051806	entry into host cell	29	1.2	PVR, CAV2, CAV1, IFITM1, LDLR, IFITM2, IFITM3, HSPA1A, ITGB3, ITGB1, SLC1A5, TRIM8, CXCR4, GSN, ITGAV, PTX3, SELPLG, ICAM1, NUP153, LGALS1, EFNB2, AXL, ITGA2, GAS6, NPC1, CD55, LAMP3, ITGA5, KPNA3	2.1	8.4e-05
GO:0050708	regulation of protein secretion	75	3.2	FOXA2, ANO1, TLR2, PTPN22, GJA1, TLR4, ANKRD1, TLR6, IL17RA, TGFB1, ACVR1C, TGFB2, NOV, SAA1, TIAM1, GATA3, TRIM6, IL4R, SLC2A1, IL1RAP, RABGEF1, RAPGEF4, ADAM8, EGFR, PRKCA, IRS2, STX1A, KIF5B, PTGER4, RPH3AL, CD40, ARNTL, NLRP3, HLA-E, PRKCE, IRS1, NLRP1, MAP4K4, VEGFC, RAB11FIP5, RGCC, PAEP, SSC5D, GBP1, WNT5A, PAM, C5, GSDMD, PML, TCF7L2, EZR, NR1D1, TRAF6, SRGN, FN1, RHBDF2, CARD8, IL6, IL1R…	1.5	0.00013
GO:0003209	cardiac atrium morphogenesis	13	0.6	WNT5A, SHOX2, NOTCH2, NOTCH1, NOG, SOS1, TBX20, HEG1, NKX2-5, ENG, ACVR1, TGFB2, CYR61	3.3	4.4e-05
GO:0060322	head development	124	5.3	MEF2C, DLC1, SYT1, NOG, PLXNA2, LPAR1, RORA, AQP1, TGFB1, TGFB2, ATP2B1, S1PR1, SERPINE2, ROBO1, SEMA7A, CEP290, AFDN, ASPM, EGFR, RBFOX2, SATB2, IRS2, RARG, PTPRG, MYH3, TRABD2A, BCL2A1, BASP1, DDIT4, HHEX, LRRK2, SMARCA1, EXT1, SLITRK5, WNT5A, FGFR1, C11ORF63, SLC38A2, CDK5R2, PFKFB3, ITGB1, NR2C2, EPHB2, SEMA5A, NIPBL, B3GNT5, HNMT, NKX2-1, LAMB1, BMP4, SMG9, TAF1, BMP2, TGFBR2, SPHK1, NR4A2, …	1.4	0.00015
GO:0061326	renal tubule development	26	1.1	MEF2C, NOG, ADAMTS16, SOX9, GLI3, TGFB1, LIF, OSR1, FAT4, WNK4, GATA3, PAX8, ILK, YAP1, FGF1, BMP4, BMP2, COL4A1, SIX4, WWTR1, STAT1, FMN1, NOTCH1, LAMA5, TACSTD2, SIX1	2.2	8.3e-05
GO:0007346	regulation of mitotic cell cycle	90	3.8	CLSPN, E2F7, BTRC, BORA, EDN1, TTK, AURKA, TGFB1, GTSE1, KANK2, SHB, BRINP2, MTBP, TPR, SIK1, PLCB1, TOP2A, KIF14, EGFR, PID1, PRKCA, CEP85, KIF11, DDB1, PIM1, TPX2, PKN2, ESPL1, GPR132, RB1, UBE2C, HMGA2, PKIA, NABP1, RFWD3, EREG, CCND2, MCIDAS, RGCC, ADAM17, FOXC1, PDCD6IP, CARM1, GADD45A, CCDC8, CAV2, FGFR1, BLM, TICRR, FHL1, SLF2, PML, ANLN, AFAP1L2, ZNF655, SFN, TIMP2, ZFP36L1, PHIP, ZFP36L2…	1.5	0.00014
GO:0010466	negative regulation of peptidase activity	52	2.2	CAST, HMSD, LXN, MMP9, SPINK1, AQP1, PICALM, CD44, SERPINE2, CDKN2D, SERPINA5, CASP8, SERPINE1, SERPINA1, MKL1, PI16, TFPI2, WFDC10B, BST2, LEF1, CST1, IFI16, PLAUR, SERPINF1, ANXA8L1, CST4, SERPINB8, SERPINB1, ANOS1, PROS1, WFDC2, WFDC3, SPOCK3, C3, C5, TIMP4, SFN, TIMP2, SERPINH1, TIMP1, COL7A1, COL6A3, THBS1, CRIM1, IL6, BIRC3, FURIN, ECM1, GAS6, LAMP3, PI3, KLF4	1.7	0.00012
GO:0050772	positive regulation of axonogenesis	21	0.9	TNFRSF12A, TRPV2, CRABP2, MAP1B, L1CAM, CDH4, SLIT2, SEMA5A, SHOX2, BDNF, MACF1, ROBO1, TIAM1, SEMA7A, BCL11A, ILK, PAFAH1B1, SKIL, NRG1, GOLGA4, FN1	2.4	7.5e-05
GO:1904888	cranial skeletal system development	19	0.8	MEF2C, BMP4, TGFBR1, TGFBR2, MED12, SIX2, SMAD3, SIX4, MMP14, GLI3, MTHFD1L, TGFB1, TGFB2, NIPBL, SIX1, CHST11, RAB23, SETD2, RUNX2	2.6	6.9e-05
GO:0035457	cellular response to interferon-alpha	7	0.3	IFIT3, IFIT2, GATA3, AXL, OAS1, TPR, GAS6	6.2	1.4e-05
GO:0071216	cellular response to biotic stimulus	40	1.7	CSF3, MEF2C, WNT5A, CSF2, IL18, TLR2, CXCL8, NFKBIA, PTPN22, TLR4, ANKRD1, ABCA1, TLR6, TGFB1, EDNRB, NR1D1, PDE4B, SERPINE1, TRAF6, PRKCA, IRAK2, ZFP36, ICAM1, IL6, CEBPB, LY96, AXL, PDE4D, CD40, PRKCE, NLRP3, PLSCR4, MAPK14, PLSCR3, IL12A, TBXA2R, PRDM1, APAF1, TNFAIP3, GSTP1	1.8	0.00011
GO:0048705	skeletal system morphogenesis	46	2	MEF2C, FGFR1, NOG, TIPARP, ZEB1, SOX9, GLI3, SERPINH1, MTHFD1L, TGFB1, TGFB2, NIPBL, OSR1, CTGF, COL27A1, CYP26B1, CHST11, RAB23, RUNX2, BMP4, SATB2, RARG, COL13A1, TGFBR1, TGFBR2, MED12, SIX2, SMAD3, SIX4, MMP14, WDR48, SHOX2, FMN1, HOXB3, ACVR2B, NAB2, HOXD3, MAPK14, NAB1, SIX1, HOXD4, SP5, HAS2, STC1, SETD2, CARM1	1.7	0.00012
GO:0030833	regulation of actin filament polymerization	36	1.5	CSF3, ARHGAP18, ABI2, FER, CCL26, CCL24, ACTR2, CDC42EP2, CDC42EP1, GSN, TMSB15B, WIPF1, CDC42EP3, RASA1, ICAM1, HCLS1, NCKAP1L, TMSB10, RICTOR, PRKCE, MYADM, SLIT2, VASP, NCKAP1, FMN1, CORO1A, EPS8, GMFG, CAPG, FHOD3, FCHSD2, TMOD3, SPTBN1, TMSB4X, FCHSD1, SPTAN1	1.9	0.00012
GO:0002696	positive regulation of leukocyte activation	62	2.6	MEF2C, IL6ST, IL18, PTPN22, TLR4, IL15, GLI3, TGFB1, FLT3LG, MAP3K7, SHB, HSPH1, GAB2, CLCF1, GATA3, IL4R, HLX, IL15RA, PIK3CA, PAK1, ADAM8, EBI3, AP3B1, IRS2, BST1, EFNB2, HLA-A, CD40, NLRP3, MMP14, HLA-E, PDCD1LG2, CARD11, CD83, IL12A, PRDM1, WNT5A, CAV1, ADORA2B, SLC39A10, IL7R, STAT6, TRAF6, NFATC2, THBS1, PELI1, IL6, IL1RL1, LGALS1, TGFBR2, AXL, ANXA1, NCKAP1L, ATAD5, RICTOR, GAS6, PTPN11, C…	1.6	0.00015
GO:0002576	platelet degranulation	28	1.2	TLN1, FAM3C, PDGFA, F13A1, ITGB3, TGFB1, TGFB2, VCL, TIMP1, LGALS3BP, BRPF3, SERPINE1, SERPINA1, THBS1, QSOX1, SRGN, FN1, PHACTR2, ACTN4, ACTN1, ACTN2, PCDH7, ECM1, FLNA, GAS6, VEGFC, TMSB4X, PROS1	2.1	0.00011
GO:0010464	regulation of mesenchymal cell proliferation	14	0.6	WNT5A, BMP4, FGFR1, IRS2, PDGFA, TGFBR2, LMNA, ZEB1, SOX9, STAT1, FOXP2, SHOX2, SIX1, PTN	3.1	6.1e-05
GO:0044744	protein targeting to nucleus	57	2.4	PTGS2, IL18, TLR2, PTPN22, TLR4, GLI3, TGFB1, TGFB2, NOV, AKR1C3, TMEM173, DAB2, RAE1, MDFIC, RAB23, TPR, EGFR, HSP90AA1, SIX2, NLRP3, PKIA, ECT2, FLNA, GNAQ, IPO7, KPNA7, KPNA4, KPNA3, CSF3, APC2, NFKBIE, PML, PPP3R1, NFKBIA, SEMA5A, NUP214, NUP50, BCL3, BMP4, IL6, NUP153, TGFBR1, HCLS1, SPHK1, LMNA, SMAD3, SNAI2, WWTR1, GAS6, FZD7, DDX58, RGS20, PDE2A, PRICKLE1, MAPK14, SPTBN1, TRIP6	1.6	0.00015
GO:0006606	protein import into nucleus	57	2.4	PTGS2, IL18, TLR2, PTPN22, TLR4, GLI3, TGFB1, TGFB2, NOV, AKR1C3, TMEM173, DAB2, RAE1, MDFIC, RAB23, TPR, EGFR, HSP90AA1, SIX2, NLRP3, PKIA, ECT2, FLNA, GNAQ, IPO7, KPNA7, KPNA4, KPNA3, CSF3, APC2, NFKBIE, PML, PPP3R1, NFKBIA, SEMA5A, NUP214, NUP50, BCL3, BMP4, IL6, NUP153, TGFBR1, HCLS1, SPHK1, LMNA, SMAD3, SNAI2, WWTR1, GAS6, FZD7, DDX58, RGS20, PDE2A, PRICKLE1, MAPK14, SPTBN1, TRIP6	1.6	0.00015
GO:0014706	striated muscle tissue development	68	2.9	MEF2C, NOG, MEF2A, MYH15, EDN1, TBX20, GJA1, ANKRD1, TGFB1, TGFB2, S1PR1, HLX, SOX15, SEMA3C, NRG1, SIK1, EGR1, EGR2, EFNB2, FOXN2, LEF1, ACTN2, RB1, SIX4, ARNTL, NEXN, FLNB, XIRP2, CFL2, SIX1, FHOD3, FOXC1, ACVR1, WNT5A, CAV2, FGFR1, CAV1, FHL2, AKAP13, ITGB1, ZBTB18, DNER, CYP26B1, OBSL1, HEG1, BCL9L, SKIL, NKX2-5, BMP4, KLF5, MAFF, BMP2, ACTC1, TGFBR1, TGFBR2, LMNA, RCAN1, PPP1R13L, FOXP2, SHO…	1.5	0.00016
GO:0000226	microtubule cytoskeleton organization	80	3.4	GAS2L3, KIF23, KIFC1, XPO1, KIF24, PRC1, TTK, AURKA, FER, AURKB, OFD1, SPRY2, SPRY1, SLK, CAMSAP2, STARD9, TPR, DYNC1H1, ASPM, KIF14, CEP85, ARHGEF2, KIF11, STMN3, ROCK2, TPX2, ESPL1, KIAA0753, MYH9, CEP152, BICD2, FLNA, DCTN1, ARHGEF10, EML2, NAV1, CEP350, SGO1, CLIP1, PDCD6IP, GADD45A, DST, MAP7D3, CCDC8, SDCCAG8, KIF4A, CEP120, C11ORF63, APC2, CEP126, BRSK1, ULK4, MAP10, PTK2, EZR, FIGN, PPP1R…	1.5	0.00017
GO:0050863	regulation of T cell activation	60	2.6	IL6ST, IL18, PTPN22, IL15, ZEB1, PAWR, SDC4, GLI3, TGFB1, MAP3K7, SHB, HSPH1, GSN, GATA3, IL4R, HLX, PIK3CA, PAK1, ADAM8, FANCA, EBI3, CEACAM1, AP3B1, EFNB2, HLA-A, HLA-E, NLRP3, PDCD1LG2, CARD11, CD83, CAMK4, PDE5A, IL12A, PRDM1, PRNP, CAV1, HFE, IL7R, RAC2, SOS1, CYP26B1, TRAF6, BMP4, IL6, PELI1, CEBPB, LGALS3, LGALS1, TGFBR2, ANXA1, NCKAP1L, RICTOR, PTPN11, CLPTM1, CD55, CORO1A, FYN, CD59, CD2…	1.6	0.00016
GO:0051046	regulation of secretion	118	5	MEF2C, SYT1, KCNC4, SNCAIP, EDN1, TLR2, PTPN22, TLR4, ANKRD1, AQP1, TLR6, TGFB1, IL17RA, IL11, TGFB2, NOV, GAB2, TIAM1, GATA3, WNK4, SLC2A1, RABGEF1, RAPGEF4, ADAM8, CRY1, EGFR, IRS2, KIF5B, CD40, ARNTL, HLA-E, IRS1, MAP4K4, VEGFC, UNC13D, RGCC, STC1, PDCD6IP, PAEP, LRRK2, SSC5D, GBP1, WNT5A, FGFR1, PAM, CDK5R2, ADORA2B, GSDMD, HFE, RIMS2, LIF, RAC2, P2RY2, TRAF6, IL1RAPL1, SRGN, FN1, RHBDF2, CAR…	1.4	0.00019
GO:0022414	reproductive process	216	9.2	KIFC1, NOG, ADCY7, PTGS2, EDN1, FSTL3, AURKA, SHB, MEI1, SERPINE2, HTRA1, FOXF2, CCNA1, RARG, PLD6, CRTAP, ESPL1, UBR2, MYH9, SPAG9, SGO2, SERPINF1, SGO1, KIAA1524, SPAG4, CATSPER1, STC1, HAS2, MST1R, PRDM1, WFDC2, TDRD7, SLC2A14, HFE, LIF, NKX2-1, BMP4, PLAG1, MKI67, TGFBR1, TGFBR2, ALMS1, ATM, PTPN11, CCT7, CYP7B1, NOTCH1, CD55, IFI27, CCT4, ETS1, PI3, SMURF2, AREG, PLA2G4C, NCOR2, CREBRF, PPAR…	1.2	0.00022
GO:0014032	neural crest cell development	21	0.9	NRP2, EDN1, LEF1, SNAI2, SOX9, SEMA5A, EDNRA, CORO1C, EDNRB, SEMA6B, SEMA4F, LAMA5, SEMA7A, SEMA3E, SEMA4C, SEMA4B, SEMA3C, FOXC1, SEMA3A, NRG1, ACVR1	2.4	9.4e-05
GO:0010717	regulation of epithelial to mesenchymal transition	21	0.9	NOG, BMP2, GCNT2, FOXA2, TGFBR1, TGFBR2, SMAD3, LEF1, WWTR1, TCF7L2, TGFB1, TGFB2, NOTCH1, DAB2, RGCC, NKX2-1, BCL9L, TGFB1I1, ENG, PHLDB2, ACVR1	2.4	9.4e-05
GO:0048146	positive regulation of fibroblast proliferation	18	0.8	ZFP36, CREBRF, EGFR, IL6, EDN1, ANXA1, NR3C1, AQP1, TGFB1, DDIT4, ATP2B1, ZFP36L1, ZFP36L2, SERPINF1, FBXO32, STC1, ERRFI1, GSTP1	2.6	8.4e-05
GO:0071385	cellular response to glucocorticoid stimulus	18	0.8	WNT5A, EGFR, S100A6, FOSL2, PDGFA, SPHK1, PML, CDK6, LIG4, AQP1, GAS6, TGFB1, ANXA2, WAPL, EREG, PDGFC, PDGFD, FN1	2.6	8.4e-05
GO:0050776	regulation of immune response	151	6.4	PVR, MEF2C, MICB, ZC3HAV1, IL6ST, IL18, BTRC, TLR2, PTPN22, TLR4, IL15, TLR6, TGFB1, TGFB2, CFP, MAP3K7, NLRC5, SHB, GAB2, GATA3, SEMA7A, PDE4B, CFH, RABGEF1, PIK3CA, ADAM8, COCH, GBP5, BST2, SOCS3, RELB, HLA-A, PDE4D, HLA-B, CD40, HLA-E, TANK, UNC13D, RGCC, TNFAIP3, GBP1, WNT5A, IFIH1, CAV1, IFITM1, ADORA2B, HFE, NFKBIA, HSPA1A, ITGB2, ITGB1, IRAK3, PTK2, RAC2, TRAF6, DHX58, PELI1, SPNS2, LGALS3…	1.3	0.00021
GO:0035710	CD4-positive, alpha-beta T cell activation	20	0.9	SATB1, IL6, CEBPB, PTGER4, IL18, RELB, ANXA1, NCKAP1L, LEF1, RORA, NLRP3, ATP7A, STAT6, SHB, CD83, CD55, HLX, IL4R, GATA3, BCL3	2.4	9.3e-05
GO:0031345	negative regulation of cell projection organization	36	1.5	WNT5A, VIM, ASAP1, LPAR1, EPHB2, SEMA5A, SPRY2, PTK2, SEMA7A, BCL11A, SEMA3E, INPP5F, IL15RA, SEMA3C, PAFAH1B1, SEMA3A, NR2F1, DNM3, ARHGEF1, PTPRG, LGALS1, NLGN3, ITGA3, SLIT2, MAP4K4, EPHA4, SEMA6B, LRP1, ID1, SEMA4F, TACSTD2, SEMA4C, SEMA4B, PMP22, CARM1, LRP4	1.9	0.00013
GO:0002221	pattern recognition receptor signaling pathway	37	1.6	IFIH1, CAV1, ZC3HAV1, TLR2, NFKBIA, PTPN22, TLR4, HSPA1A, ITGB2, TLR6, SEC14L1, MAP3K7, IRAK3, NOD1, NR1D1, MAP3K1, DDX60, CASP8, TRAF6, TNIP1, DHX58, CHUK, IRAK2, PELI1, LY96, ERBIN, CTSS, PRKCE, RFTN1, BIRC3, TANK, DDX58, CYBA, RIPK1, IRF1, TNFAIP3, DMBT1	1.8	0.00014
GO:1902593	single-organism nuclear import	57	2.4	PTGS2, IL18, TLR2, PTPN22, TLR4, GLI3, TGFB1, TGFB2, NOV, AKR1C3, TMEM173, DAB2, RAE1, MDFIC, RAB23, TPR, EGFR, HSP90AA1, SIX2, NLRP3, PKIA, ECT2, FLNA, GNAQ, IPO7, KPNA7, KPNA4, KPNA3, CSF3, APC2, NFKBIE, PML, PPP3R1, NFKBIA, SEMA5A, NUP214, NUP50, BCL3, BMP4, IL6, NUP153, TGFBR1, HCLS1, SPHK1, LMNA, SMAD3, SNAI2, WWTR1, GAS6, FZD7, DDX58, RGS20, PDE2A, PRICKLE1, MAPK14, SPTBN1, TRIP6	1.6	0.00017
GO:0050663	cytokine secretion	38	1.6	WNT5A, C5, GSDMD, TLR2, PML, PTPN22, TLR4, ABCA1, TLR6, IL17RA, EZR, SAA1, GATA3, TRIM6, IL4R, IL1RAP, RABGEF1, SRGN, FN1, IL6, CARD8, GBP5, PTGER4, IL1RL1, ANXA1, NLRP3, NLRP1, GAS6, NOTCH1, MAPK14, CD274, CD58, RGCC, SPTBN1, PAEP, SSC5D, NLRP10, GBP1	1.8	0.00014
GO:0071774	response to fibroblast growth factor	33	1.4	IER2, WNT5A, FGFR1, FGF5, NOG, TNC, CXCL8, IQGAP1, POLR2A, SETX, ZFP36L1, ZFP36L2, SPRY2, SPRY1, CD44, CTGF, FAT4, GATA3, SPRED2, SPRED1, FGF1, THBS1, FLRT3, ZFP36, RBFOX2, FLRT2, CBL, CDC5L, SNAI2, PTPN11, NPTN, ANOS1, SHCBP1	1.9	0.00013
GO:0001569	patterning of blood vessels	13	0.6	GNA13, COL4A1, TBX20, TGFBR2, EDN1, LEF1, STK4, EDNRA, SEMA3E, PLXND1, RBM15, ENG, ACVR1	3.2	6.6e-05
GO:1903900	regulation of viral life cycle	40	1.7	CAV2, RSF1, ZC3HAV1, IFITM1, IFITM2, IFITM3, OAS3, PML, CXCL8, OAS1, APOBEC3C, APOBEC3D, ISG20, POLR2A, ISG15, TRIM8, MDFIC, GSN, TRIM6, CHD1, PTX3, TOP2A, TNIP1, ZFP36, SP100, BST2, DDB1, LGALS1, PKN2, LEF1, IFI16, HMGA2, SRPK1, STOM, PLSCR1, NOTCH1, IFIT1, OASL, LAMP3, SP1	1.8	0.00015
GO:0042088	T-helper 1 type immune response	15	0.6	IL27RA, IL1RL1, IL18, RELB, ANXA1, LEF1, TLR4, TLR6, STAT6, IL4R, HLX, BCL3, TRAF6, NLRP10, EBI3	2.9	7.7e-05
GO:0000003	reproduction	216	9.2	KIFC1, NOG, ADCY7, PTGS2, EDN1, FSTL3, AURKA, SHB, MEI1, SERPINE2, HTRA1, FOXF2, CCNA1, RARG, PLD6, CRTAP, ESPL1, UBR2, MYH9, SPAG9, SGO2, SERPINF1, SGO1, KIAA1524, SPAG4, CATSPER1, STC1, HAS2, MST1R, PRDM1, WFDC2, TDRD7, SLC2A14, HFE, LIF, NKX2-1, BMP4, PLAG1, MKI67, TGFBR1, TGFBR2, ALMS1, ATM, PTPN11, CCT7, CYP7B1, NOTCH1, CD55, IFI27, CCT4, ETS1, PI3, SMURF2, AREG, PLA2G4C, NCOR2, CREBRF, PPAR…	1.2	0.00023
GO:0042307	positive regulation of protein import into nucleus	26	1.1	MEF2A, ITGB1, ITPKA, EPHB2, PICALM, TIAM1, ILK, DLG4, OBSL1, PAFAH1B1, SEMA3A, IL1RAPL1, DCLK1, RBFOX2, DNM3, KLF7, NLGN3, SHANK1, FARP1, FMN1, EPHA4, ID1, FYN, LRRK2, SLITRK5, LRP4	2.1	0.00012
GO:0048813	dendrite morphogenesis	26	1.1	CSF3, PTGS2, IL18, PPP3R1, TLR2, PTPN22, TLR4, GLI3, TGFB1, SEMA5A, DAB2, TMEM173, TPR, BMP4, EGFR, IL6, HSP90AA1, TGFBR1, HCLS1, SPHK1, SMAD3, ECT2, FLNA, DDX58, MAPK14, TRIP6	2.1	0.00012
GO:0033554	cellular response to stress	271	11.6	MEF2C, XRCC4, PTGS2, EDN1, PTPN22, AURKA, RORA, AQP1, MAP3K7, EPC2, CD44, STAC, ISG15, VPS13C, MC1R, CTGF, RAE1, CREB3L1, ADAM8, CRY1, SLC12A6, PTPRK, LIG1, HMG20A, OPTN, LIG4, MECOM, DCTN1, TANK, DCLRE1C, SPAG9, UHRF1, RGCC, STC1, HAS2, TICRR, UBA7, NFKBIA, HFE, HSPA1A, CEP164, SLC29A1, NUP50, BMP2, NRBF2, MKI67, KLF10, UBE2L6, SMYD2, OXSR1, ATM, EPHA2, GAS6, PTPN11, EPHA4, NOTCH1, ETS1, SUPT16H…	1.2	0.00024
GO:0060841	venous blood vessel development	9	0.4	ACVR2B, NOTCH1, TBX20, EFNB2, CCBE1, HEG1, SEMA3C, NKX2-5, ENG	4.5	3.9e-05
GO:0045787	positive regulation of cell cycle	66	2.8	KIF23, E2F7, EDN1, AURKA, AURKB, HMGN5, TGFB1, GTSE1, FLT3LG, TGFB2, SHB, RAD21, CTGF, MTBP, SOX15, TPR, PLCB1, FOSL1, KIF14, EGFR, PRKCA, ROCK2, PKN2, PIM1, LEF1, ESPL1, RB1, UBE2C, HMGA2, PRKCE, ECT2, UHRF2, EREG, CCND2, RGCC, ADAM17, CARM1, GADD45A, WNT5A, FGFR1, CEP120, SLF2, PML, SFN, PHIP, MAP10, PTK6, PAFAH1B1, NDRG1, MUC1, DLGAP5, SPHK1, ANXA1, BRCA2, CENPJ, ATM, PTPN11, CSPP1, ATRX, PLK4…	1.5	0.00019
GO:0072088	nephron epithelium morphogenesis	22	0.9	BMP4, NOG, BMP2, ADAMTS16, SIX2, SIX4, SOX9, STAT1, GLI3, TGFB1, FMN1, LIF, OSR1, FAT4, TACSTD2, LAMA5, GATA3, WNK4, PAX8, SIX1, ILK, FGF1	2.3	0.00012
GO:0072080	nephron tubule development	25	1.1	MEF2C, NOG, ADAMTS16, SOX9, GLI3, TGFB1, LIF, OSR1, FAT4, WNK4, GATA3, PAX8, ILK, YAP1, FGF1, BMP4, BMP2, SIX4, WWTR1, STAT1, FMN1, NOTCH1, LAMA5, TACSTD2, SIX1	2.2	0.00013
GO:0071417	cellular response to organonitrogen compound	87	3.7	MEF2C, ADCY7, CPEB2, PTGS2, PPARG, EDN1, PTPN22, RANGAP1, FER, ZEB1, AQP1, TGFB1, GSTM2, CASP4, NOD1, PDE4B, PIK3CA, PDGFC, PAK1, OGT, PDGFD, ERRFI1, CEACAM1, GPR173, EGR1, PID1, PIK3CG, EGFR, ICAM1, IRS2, ARHGEF2, C2CD5, SOCS3, PDE4D, ACTN2, UBR2, CDC5L, LPIN1, IRS1, SLIT2, STC1, GNB4, CA2, LRRK2, GSTP1, CAV2, CAV1, BLM, GNG11, SOX9, PHIP, ZFP36L1, HRH1, PTK2, EZR, SOS1, PCSK9, KLF5, TAF1, IL6, …	1.4	0.00021
GO:0090068	positive regulation of cell cycle process	52	2.2	KIF23, E2F7, EDN1, AURKA, AURKB, TGFB1, GTSE1, RAD21, CTGF, MTBP, SOX15, TPR, PLCB1, KIF14, ROCK2, PKN2, LEF1, ESPL1, RB1, PRKCE, HMGA2, UBE2C, ECT2, UHRF2, EREG, CCND2, RGCC, CARM1, GADD45A, WNT5A, FGFR1, CEP120, SLF2, PML, SFN, PHIP, MAP10, NDRG1, MUC1, DLGAP5, ANXA1, CENPJ, ATM, ATRX, CSPP1, PLK4, PLK3, SVIL, CENPV, KIF20B, TMOD3, CIT	1.6	0.00018
GO:0042089	cytokine biosynthetic process	27	1.2	ZFP36, EGR1, WNT5A, IL6, NMI, CEBPB, IL18, TLR4, PAWR, TLR6, TRIB2, CARD11, INHBA, MAST4, NOD1, EREG, IL1RAP, IRF1, ASB1, BCL3, TRAF6, THBS1, LTB, ERRFI1, PCSK5, KLF4, EBI3	2.1	0.00014
GO:0048332	mesoderm morphogenesis	21	0.9	WNT5A, BMP4, FGFR1, NOG, TBX20, ITGB4, SIX2, SMAD3, LEF1, ITGA2, ITGA3, ITGB3, HMGA2, ITGB1, EPHA2, INHBA, DKK1, FOXC1, SETD2, KLF4, ACVR1	2.3	0.00012
GO:2000379	positive regulation of reactive oxygen species metabolic process	24	1	EGFR, PID1, ICAM1, IL6, HSP90AA1, PTGS2, TGFBR2, EDN1, SMAD3, TLR4, ITGB2, TGFB1, SOD2, AKR1C3, CYBA, RIPK1, MAPK14, NFE2L2, THBS1, KLF2, PTX3, GADD45A, KLF4, GSTP1	2.2	0.00013
GO:0001959	regulation of cytokine-mediated signaling pathway	34	1.5	WNT5A, CREBRF, TRAF1, CAV1, PXDN, IL6ST, CSF1, EDN1, PPARG, HSPA1A, NLRC5, IRAK3, ROBO1, TRIM6, CASP8, RABGEF1, PAFAH1B1, CHUK, IRAK2, IL6, SOCS3, SPHK1, AXL, BIRC3, STAT1, ECM1, GAS6, SLIT2, PTPN11, RIPK1, CPNE1, JAK1, TNFAIP3, GSTP1	1.9	0.00016
GO:0048659	smooth muscle cell proliferation	28	1.2	PTGS2, MMP9, IL18, EDN1, PPARG, IL15, NOV, S1PR1, ILK, TGM2, PDGFD, THBS1, TRAF6, EGFR, BMP4, IL6, TGFBR2, ITGA2, STAT1, CYBA, EREG, AKR1B1, IL12A, HBEGF, TNFAIP3, IGFBP3, GSTP1, KLF4	2	0.00015
GO:0060759	regulation of response to cytokine stimulus	35	1.5	IL27RA, IL18, TLR4, RORA, APBB1IP, TGFB1, PLCL2, STAT6, SHB, CLCF1, HLX, IL4R, GATA3, BCL3, CEACAM1, EXO1, ICAM1, IL6, LGALS3, PTGER4, MSH2, SWAP70, LGALS1, RELB, ANXA1, LEF1, ATAD5, CD40, LIG4, NLRP3, ATP7A, NOTCH2, CORO1A, UNC13D, PLCG2	1.9	0.00017
GO:0002285	lymphocyte activation involved in immune response	35	1.5	WNT5A, CREBRF, TRAF1, CAV1, PXDN, IL6ST, CSF1, EDN1, PPARG, HSPA1A, NLRC5, IRAK3, ROBO1, TRIM6, CASP8, RABGEF1, PAFAH1B1, CHUK, IRAK2, IL6, SOCS3, SPHK1, AXL, BIRC3, STAT1, ECM1, GAS6, SLIT2, PTPN11, RIPK1, CPNE1, JAK1, TNFAIP3, KLF4, GSTP1	1.9	0.00017
GO:0042035	regulation of cytokine biosynthetic process	26	1.1	WNT5A, NMI, TLR4, IGF2BP2, IGF2BP3, TLR6, TRIB2, GATA3, BCL3, THBS1, TRAF6, ERRFI1, LTB, EBI3, EGR1, ZFP36, IL6, CEBPB, PRG2, MAST4, INHBA, CARD11, EREG, ASB1, IRF1, KLF4	2.1	0.00015
GO:0001838	embryonic epithelial tube formation	31	1.3	DLC1, WNT5A, NOG, LUZP1, SOX9, SDC4, MTHFD1L, TGFB1, TGFB2, OSR1, GATA3, PAX8, TRAF6, IPMK, BMP4, RARG, MED12, TEAD2, CELSR1, SIX4, FZD2, STK4, VASP, MIB1, PRICKLE1, ADM, SIX1, SEMA4C, KIF20B, APAF1, SETD2	2	0.00016
GO:0030168	platelet activation	37	1.6	GNA13, TLN1, GNA15, PDGFA, FERMT3, TLR4, ITGB3, MYL9, VCL, RAC2, SERPINE2, SAA1, UBASH3B, ILK, PIK3CA, CEACAM1, RHOG, ACTB, PRKCA, PIK3CG, IL6, AXL, ACTN1, CD40, PRKCE, ITPR3, MYH9, GAS6, ITPR1, FLNA, ITPR2, PTPN11, PLSCR1, THBD, GNAQ, FYN, PLCG2	1.8	0.00018
GO:0042113	B cell activation	51	2.2	MEF2C, IL27RA, APLF, LRRC8A, TLR4, PAWR, TGFB1, IL11, SHB, CLCF1, CASP8, IRS2, BST2, BST1, LEF1, CD40, LIG4, DCAF1, MMP14, AHR, DCLRE1C, CARD11, INHBA, HHEX, ADAM17, PRDM1, TNFAIP3, SLC39A10, IL7R, ITGB1, PLCL2, ZFP36L1, STAT6, ZFP36L2, POU2F2, BCL3, NFATC2, EXO1, KLF6, IL6, PELI1, SWAP70, MSH2, LGALS1, NCKAP1L, ATAD5, ATM, NOTCH2, PLCG2, CMTM7, HDAC9	1.6	0.00021
GO:0030879	mammary gland development	32	1.4	WNT5A, PAM, CAV1, CSF1, BTRC, HK2, IQGAP3, PML, SOX9, GLI3, TGFB1, STAT6, SLC29A1, ARHGAP5, ROBO1, GATA3, NRG1, AGAP2, ETV4, BMP4, IRS2, CEBPB, TGFBR2, ITGA2, BRCA2, LEF1, EPHA2, ATP7A, PRLR, HOXB9, AREG, NCOR2	1.9	0.00017
GO:0060348	bone development	40	1.7	MEF2C, FAM20C, AKAP13, SOX9, GLI3, SERPINH1, TGFB1, FAT4, COL27A1, CYP26B1, RAB23, PDGFC, PAFAH1B1, RUNX2, ANO6, PAPSS2, PLS3, BMP4, SPNS2, BMP2, RARG, PTGER4, COL13A1, TGFBR2, FBN1, ASXL1, NPR2, MMP14, SIGLEC15, ANXA2, PTPN11, SHOX2, NAB2, NAB1, SP5, HAS2, STC1, CARM1, PIP4K2A, ENG	1.8	0.00019
GO:0001952	regulation of cell-matrix adhesion	25	1.1	DLC1, ROCK1, ROCK2, CSF1, SMAD3, S100A10, CDK6, SDC4, MMP14, CCL28, IQGAP1, PPM1F, FMN1, CORO1C, VEGFC, PTK2, SLK, MACF1, SERPINE1, ILK, SEMA3E, THBS1, PHLDB2, RASA1, PLAU	2.1	0.00015
GO:0050707	regulation of cytokine secretion	35	1.5	WNT5A, C5, GSDMD, TLR2, PML, PTPN22, TLR4, TLR6, IL17RA, EZR, SAA1, GATA3, TRIM6, IL4R, IL1RAP, RABGEF1, SRGN, FN1, IL6, CARD8, PTGER4, IL1RL1, ANXA1, NLRP3, GAS6, NLRP1, MAPK14, CD58, CD274, RGCC, SPTBN1, PAEP, SSC5D, NLRP10, GBP1	1.9	0.0002
GO:0072160	nephron tubule epithelial cell differentiation	8	0.3	LIF, MEF2C, OSR1, FAT4, PAX8, YAP1, WWTR1, STAT1	4.9	4.5e-05
GO:0072182	regulation of nephron tubule epithelial cell differentiation	8	0.3	LIF, OSR1, FAT4, GATA3, PAX8, YAP1, WWTR1, STAT1	4.9	4.5e-05
GO:0022617	extracellular matrix disassembly	24	1	EXOC8, MMP9, FBN1, MMP19, BCAN, CTSS, CAPN2, MMP14, TIMP2, FURIN, MMP1, TGFB1, TIMP1, TGFB2, LAMB3, CD44, MELTF, HTRA1, GSN, CAPG, LAMC2, ADAM8, ENG, FN1	2.2	0.00016
GO:0098542	defense response to other organism	89	3.8	MICB, IL27RA, ZC3HAV1, TLR2, PTPN22, IFI44L, TLR4, IL15, PMAIP1, TLR6, TGFB1, IL17RA, APOBEC3C, ISG20, APOBEC3D, IL31RA, CFP, NLRC5, TMEM173, NOD1, AP1S2, ISG15, HTRA1, TRIM6, DDX60, IL4R, SERPINE1, MX2, COCH, BATF2, BST2, PRG2, HLA-A, HERC5, OPTN, CD40, IFI16, NLRP3, HLA-E, NLRP1, DDIT4, UNC13D, ADM, MB21D1, IL12A, ADAM17, TNFAIP3, GBP3, SSC5D, GBP1, IFIH1, AP1M1, IFITM1, IFITM2, IFITM3, GSDMD, …	1.4	0.00028
GO:1904591	positive regulation of protein import	26	1.1	CSF3, PTGS2, IL18, PPP3R1, TLR2, PTPN22, TLR4, GLI3, TGFB1, SEMA5A, DAB2, TMEM173, TPR, BMP4, EGFR, IL6, HSP90AA1, TGFBR1, HCLS1, SPHK1, SMAD3, ECT2, FLNA, DDX58, MAPK14, TRIP6	2.1	0.00017
GO:0045861	negative regulation of proteolysis	62	2.6	CAST, FHIT, HMSD, LXN, MMP9, SPINK1, AQP1, PICALM, CD44, SERPINE2, CDKN2D, SERPINA5, CASP8, SERPINE1, SERPINA1, MKL1, PI16, TFPI2, WFDC10B, BST2, LEF1, CST1, IFI16, PLAUR, SERPINF1, ANXA8L1, SERPINB8, CST4, SERPINB1, ANOS1, OPHN1, LRRK2, PROS1, WFDC2, WFDC3, SPOCK3, C3, C5, PML, HFE, TIMP4, SFN, TIMP2, SERPINH1, TIMP1, COL7A1, COL6A3, THBS1, CRIM1, PLAT, TAF1, IL6, C4BPB, BIRC3, FURIN, ECM1, GAS6…	1.6	0.00025
GO:0051172	negative regulation of nitrogen compound metabolic process	233	9.9	MEF2C, NOG, MEF2A, FST, EDN1, LPAR1, AURKB, FOXF2, DHX34, PTBP3, CRY1, PTPRK, RARG, RCOR1, HMG20A, UBR2, DCAF1, MECOM, UHRF1, UHRF2, PRDM5, PRDM1, GNAI2, IGF2BP2, IGF2BP3, TAGLN3, LPCAT1, HEXIM1, CDA, NKX2-1, NKX2-5, BMP4, KLF5, BMP2, KLF12, KLF10, ASXL1, SMAD3, SMYD2, NKX6-1, ATM, GAS6, SHOX2, NOTCH1, IFI27, ETS2, JAZF1, SMURF2, KAT6B, ENG, NCOR2, KLF4, BACH1, CREBRF, ZNF488, PPARA, FOXA2, CPEB2…	1.2	0.00032
GO:0010951	negative regulation of endopeptidase activity	49	2.1	CAST, HMSD, SPOCK3, LXN, C3, MMP9, C5, SPINK1, TIMP4, SFN, AQP1, TIMP2, SERPINH1, TIMP1, PICALM, CD44, SERPINE2, COL7A1, SERPINA5, CDKN2D, CASP8, COL6A3, SERPINE1, SERPINA1, MKL1, THBS1, TFPI2, CRIM1, IL6, BST2, LEF1, CST1, IFI16, BIRC3, FURIN, GAS6, PLAUR, LAMP3, SERPINF1, ANXA8L1, SERPINB8, CST4, PI3, SERPINB1, ANOS1, PROS1, WFDC2, KLF4, WFDC3	1.7	0.00024
GO:0051302	regulation of cell division	32	1.4	KIF23, FGF5, BLM, PDGFA, E2F7, AURKA, AURKB, SFN, TGFB1, TGFB2, MAP10, SH3GLB1, PTN, PDGFC, PDGFD, FGF1, ASPM, PRPF40A, KIF14, PKN2, BRCA2, KIF18B, PRKCE, ECT2, CSPP1, VEGFC, PLK3, EREG, SVIL, KIF20B, CENPV, CIT	1.9	0.0002
GO:0010812	negative regulation of cell-substrate adhesion	17	0.7	DLC1, GCNT2, ACTN4, LGALS1, MMP14, FZD4, FZD7, CORO1C, NOTCH1, MELTF, TACSTD2, SERPINE1, SEMA3E, THBS1, PHLDB2, RASA1, GBP1	2.6	0.00013
GO:0010830	regulation of myotube differentiation	18	0.8	RBM24, MMP14, DMPK, FLT3LG, SHOX2, NOV, NOTCH1, BDNF, MAPK14, IL4R, CYP26B1, BHLHE41, SIK1, EHD1, HDAC9, NFATC2, NKX2-5, EHD2	2.5	0.00014
GO:0022409	positive regulation of cell-cell adhesion	51	2.2	FOXA2, IL6ST, IL18, FSTL3, PTPN22, IL15, GLI3, TGFB1, MAP3K7, HSPH1, SHB, CD44, HLX, IL4R, GATA3, PIK3CA, PAK1, ADAM8, EBI3, AP3B1, EFNB2, HLA-A, LEF1, HLA-E, NLRP3, PDCD1LG2, CARD11, CD83, IL12A, HAS2, WNT5A, CAV1, GCNT2, IL7R, TRAF6, IL6, LGALS1, PODXL, TGFBR2, ANXA1, NCKAP1L, RICTOR, PTPN11, MYO10, CD55, CORO1A, ITGA6, ETS1, FYN, CD59, CD274	1.6	0.00025
GO:2001237	negative regulation of extrinsic apoptotic signaling pathway	27	1.2	CSF2, MCL1, HSPA1A, TCF7L2, PHIP, ITGAV, CASP8, SERPINE1, YAP1, THBS1, NRG1, AGAP2, SCG2, BMP4, ICAM1, ARHGEF2, LGALS3, TGFBR1, LMNA, SNAI2, EYA4, ITGA6, FYN, RIPK1, TNFAIP3, GSTP1, ACVR1	2	0.00019
GO:0006936	muscle contraction	64	2.7	GNA13, NOG, E2F7, EDN1, GJA1, GLI3, LATS2, EDNRA, GATA3, PLOD3, CASP8, TIE1, SEC24D, FOSL1, CYR61, EGFR, RRP7A, SOCS3, LEF1, LIG4, MBNL1, MYH9, STK4, JUNB, MIB1, MAN2A1, HHEX, ADM, TANC2, FOXC1, EGFL8, PRDM1, ACVR1, FGFR1, CSF2, FUT8, C5, ITGB1, LIF, ZFP36L1, PLCD3, HEG1, SKIL, ERCC2, MUC1, MAFF, BMP2, CEBPB, EPAS1, MSH2, PLAC1, MYO1E, TGFBR1, TGFBR2, GJB3, SMAD3, BRCA2, CAPN2, ATP7A, NMT1, NOTCH…	1.5	0.00028
GO:0001701	in utero embryonic development	64	2.7	TLN1, PTGS2, TACR3, EDN1, TBX20, GJA1, VCL, DMPK, EDNRA, EDNRB, GSTM2, ACTG2, DYSF, STAC, ANK2, CTGF, PDE4B, SNTB1, PIK3CA, ASPH, HTR1D, CHUK, PIK3CG, HSP90AA1, ROCK1, ROCK2, MYH3, RAP1GDS1, PDE4D, ACTN2, FLNA, PLCE1, TNNT1, SMTN, HTR7, PDE5A, STC1, CAV1, ADORA2B, VIM, TPM2, TPM4, MYL9, ARHGAP42, NKX2-5, MYOF, RCSD1, CACNA2D1, ACTC1, GNAO1, SPHK1, ITGA1, ATP1A3, ITGA2, DOCK5, PPP1R13L, DOCK4, KCN…	1.5	0.00028
GO:0032944	regulation of mononuclear cell proliferation	43	1.8	MEF2C, IL6ST, SLC39A10, IL18, CSF1, PTPN22, TLR4, IL15, PAWR, SDC4, TGFB1, RAC2, CLCF1, SOS1, TRAF6, NFATC2, EBI3, BMP4, IL6, PELI1, IRS2, CEBPB, LGALS3, BST1, ANXA1, HLA-A, NCKAP1L, ATAD5, CD40, HLA-E, AHR, ATM, PDCD1LG2, CARD11, CD55, CORO1A, CD59, CD274, PDE5A, IL12A, IRF1, PRDM1, PRNP	1.7	0.00025
GO:0051170	nuclear import	59	2.5	PTGS2, IL18, TLR2, PTPN22, TLR4, GLI3, TGFB1, TGFB2, NOV, AKR1C3, TMEM173, DAB2, RAE1, MDFIC, RAB23, DDX20, TPR, EGFR, HSP90AA1, SIX2, NLRP3, PKIA, ECT2, FLNA, GNAQ, IPO7, KPNA7, KPNA4, KPNA3, CSF3, APC2, NFKBIE, PPP3R1, PML, NFKBIA, SEMA5A, NUP214, NUP50, BCL3, GEMIN5, BMP4, IL6, NUP153, TGFBR1, HCLS1, SPHK1, LMNA, SMAD3, SNAI2, WWTR1, GAS6, FZD7, DDX58, RGS20, PDE2A, PRICKLE1, MAPK14, SPTBN1, T…	1.6	0.00028
GO:0070661	leukocyte proliferation	56	2.4	MEF2C, IL6ST, ELF4, IL18, PTPN22, TLR4, IL15, PAWR, SDC4, TGFB1, FLT3LG, SHB, CLCF1, EBI3, PIK3CG, SATB1, IRS2, BST1, HLA-A, LEF1, CD40, HLA-E, PDCD1LG2, AHR, CARD11, PDE5A, IL12A, PRDM1, PRNP, TNFAIP3, GSTP1, SLC39A10, CSF1, IL7R, PLCL2, DOCK2, RAC2, SOS1, TRAF6, NFATC2, HELLS, BMP4, PELI1, IL6, CEBPB, LGALS3, ANXA1, NCKAP1L, ATAD5, ATM, CD55, CORO1A, FYN, CD59, CD274, IRF1	1.6	0.00028
GO:0014033	nephron morphogenesis	22	0.9	BMP4, NOG, BMP2, ADAMTS16, SIX2, SIX4, SOX9, STAT1, GLI3, TGFB1, FMN1, LIF, OSR1, FAT4, TACSTD2, LAMA5, GATA3, WNK4, PAX8, SIX1, ILK, FGF1	2.2	0.00018
GO:0072028	neural crest cell differentiation	22	0.9	BMP4, NOG, LTBP1, TGFBR1, EFNB2, LUZP1, GLI3, TGFB2, ADAMTS6, NOTCH1, ACVR2B, LRP1, PRICKLE1, SIX1, FOXC1, PRDM1, LOX, LRP2, PLXND1, ENG, LOXL1, MYLK	2.2	0.00018
GO:0060840	artery development	22	0.9	NRP2, MEF2C, EDN1, LEF1, SNAI2, SOX9, SEMA5A, EDNRA, CORO1C, EDNRB, SEMA6B, SEMA4F, LAMA5, SEMA7A, SEMA3E, SEMA4C, SEMA4B, SEMA3C, FOXC1, SEMA3A, NRG1, ACVR1	2.2	0.00018
GO:0002819	regulation of adaptive immune response	31	1.3	PVR, MEF2C, IL27RA, APLF, C3, IL6ST, HFE, IL7R, TGFB1, MAP3K7, STAT6, CLCF1, HLX, IL4R, GATA3, TRAF6, CEACAM1, IL6, IL1RL1, ANXA1, HLA-A, C4BPB, ATAD5, HLA-B, CD40, NLRP3, HLA-E, IRF1, IL12A, TNFAIP3, NLRP10	1.9	0.00022
GO:0060415	cytokine production involved in immune response	21	0.9	WNT5A, BMP4, ACTC1, BMP2, NOG, TGFBR1, TBX20, ANKRD1, FZD2, TGFB1, TGFB2, SHOX2, NOTCH1, S1PR1, XIRP2, HEG1, FOXC1, NRG1, NKX2-5, ENG, MYLK	2.3	0.00018
GO:0002367	muscle tissue morphogenesis	21	0.9	WNT5A, IL6, BST2, HLA-A, TLR2, HFE, TLR4, NLRP3, GAS6, TGFB1, IL31RA, TGFB2, MAP3K7, CD96, IRAK3, CD55, CAMK4, TRIM6, SEMA7A, GATA3, TRAF6	2.3	0.00018
GO:0051251	positive regulation of lymphocyte activation	57	2.4	MEF2C, IL6ST, IL18, PTPN22, TLR4, IL15, GLI3, TGFB1, FLT3LG, MAP3K7, SHB, HSPH1, CLCF1, GATA3, IL4R, HLX, IL15RA, PIK3CA, PAK1, ADAM8, EBI3, AP3B1, IRS2, BST1, EFNB2, HLA-A, CD40, MMP14, HLA-E, NLRP3, PDCD1LG2, CARD11, CD83, IL12A, PRDM1, CAV1, SLC39A10, IL7R, STAT6, TRAF6, NFATC2, IL6, PELI1, LGALS1, TGFBR2, AXL, ANXA1, NCKAP1L, ATAD5, RICTOR, GAS6, PTPN11, CD55, CORO1A, FYN, CD59, CD274	1.6	0.0003
GO:0002822	positive regulation of inflammatory response	29	1.2	PIK3CG, EGFR, WNT5A, IL6, GBP5, PTGER4, PTGS2, ADORA2B, LDLR, IL6ST, IL1RL1, C3, OSMR, IL18, GPSM3, TLR2, ITGA2, TLR4, IL15, IL17RA, CCL26, CCL24, PDE2A, ETS1, MAPK13, SERPINE1, TGM2, ADAM8, TNIP1	2	0.00023
GO:0050729	regulation of adaptive immune response based on somatic recombination of immune receptors built from immunoglobulin superfamily domains	29	1.2	PVR, MEF2C, IL27RA, APLF, C3, HFE, IL7R, TGFB1, MAP3K7, STAT6, CLCF1, HLX, IL4R, GATA3, TRAF6, CEACAM1, IL6, IL1RL1, ANXA1, HLA-A, C4BPB, ATAD5, CD40, HLA-B, NLRP3, HLA-E, IL12A, TNFAIP3, NLRP10	2	0.00023
GO:2000811	negative regulation of anoikis	9	0.4	CAV1, PTK2, NOTCH1, MCL1, ITGA5, PDK4, PIK3CA, SNAI2, ITGB1	4.2	7.4e-05
GO:0032060	bleb assembly	7	0.3	ROCK1, LPAR1, EMP3, PMP22, ANO6, EMP1, MYLK	5.6	4.2e-05
GO:0048251	regulation of metanephric nephron tubule epithelial cell differentiation	6	0.3	ATP7A, TNXB, FBLN5, THSD4, MYH11, LOX	6.8	2.5e-05
GO:0072307	elastic fiber assembly	6	0.3	LIF, FAT4, PAX8, YAP1, WWTR1, STAT1	6.8	2.5e-05
GO:0060037	pharyngeal system development	11	0.5	BMP4, NOG, ECE1, PLXNA2, TGFBR1, GATA3, SIX1, SIX4, NKX2-5, ACVR1, TGFB2	3.5	0.0001
GO:0051347	positive regulation of transferase activity	110	4.7	MEF2C, ADCY7, PDGFA, IL18, BTRC, EDN1, CSPG4, IQGAP3, TNFSF15, TLR4, LPAR1, AURKB, TLR6, TGFB1, IQGAP1, TGFB2, MAP3K7, CD44, TIAM1, MDFIC, ILK, PIK3CA, PDGFC, PDGFD, ADAM8, PIK3CG, EGFR, PIM1, CD40, STK4, IRS1, SPAG9, PLCE1, PDE5A, RGCC, MST1R, LRRK2, WNT5A, SNX9, FGFR1, CDK5R2, GNAI2, ADORA2B, AKAP13, AFAP1L2, ITGB3, PTK2, DYNAP, PPP1R3G, TRAF6, BMP4, BMP2, TGFBR1, TGFBR2, ITGA1, NCKAP1L, PIBF1,…	1.4	0.00038
GO:0032675	regulation of interleukin-6 production	27	1.2	WNT5A, ADORA2B, TLR2, PTPN22, TLR4, AFAP1L2, TLR6, IRAK3, NOD1, IL1RAP, RABGEF1, TRAF6, AKIRIN2, IL6, ARHGEF2, CEBPB, NCKAP1L, HLA-B, GAS6, DDX58, CYBA, EREG, MAPK13, PAEP, TNFAIP3, KLF2, NLRP10	2	0.00023
GO:0048706	embryonic skeletal system development	30	1.3	NMI, IL27RA, PPARG, HFE, FER, IL7R, TGFB1, TGFB2, STAT6, NLRC5, CD96, IRAK3, HLX, IL4R, RABGEF1, CEACAM1, DHX58, LGALS3, BST2, IL1RL1, ANXA1, HLA-A, C4BPB, IFI16, HLA-B, HLA-E, CD55, CD59, GPR17, TNFAIP3	1.9	0.00024
GO:0050777	negative regulation of immune response	30	1.3	MEF2C, WNT5A, NOG, ZEB1, HOXD1, GLI3, MTHFD1L, NIPBL, OSR1, SLC35D1, CHST11, PCSK5, RUNX2, BMP4, SATB2, TGFBR1, TGFBR2, MED12, SIX2, SMAD3, SIX4, MMP14, HOXB3, SHOX2, HOXD3, SIX1, HOXD4, HOXB9, EXT1, SETD2	1.9	0.00024
GO:0007266	Rho protein signal transduction	25	1.1	GNA13, DLC1, RHOJ, ARHGEF3, ARHGEF1, ROCK1, ROCK2, AKAP13, ITGA3, MYO9B, LPAR1, ABCA1, CELSR1, ARHGAP29, ITGB1, CDC42EP2, CDC42EP1, ARHGAP5, ROBO1, ARHGAP42, GPR17, ARAP3, CDC42EP3, RHOG, CHUK	2.1	0.00022
GO:0014015	positive regulation of gliogenesis	16	0.7	PLAG1, ZNF488, BMP2, IL6ST, CSF1, PPARG, SYNJ1, TLR2, NKX6-1, LIF, NOTCH1, SERPINE2, CXCR4, CLCF1, TIAM1, ETV5	2.6	0.00016
GO:0046825	response to fluid shear stress	13	0.6	XPO1, IFI27, SP100, XPO5, XPO4, PTPN14, RANGAP1, SFN, TPR, TCF7L2, GAS6, GTSE1, PTPN11	3	0.00014
GO:0034405	regulation of protein export from nucleus	13	0.6	MEF2C, CSF2, PTGS2, ETS1, GJA1, HAS2, ABCA1, CA2, NFE2L2, KLF2, TFPI2, KLF4, TGFB1	3	0.00014
GO:0009612	response to mechanical stimulus	43	1.8	SLC38A2, PTGS2, TNC, EDN1, PPARG, NFKBIA, GJA1, TLR4, ANKRD1, AQP1, SOX9, TGFB1, USP53, MEIS2, SERPINE2, CASP8AP2, MAP3K1, BAG3, CASP8, CNN2, THBS1, FOSL1, EGFR, IL6, PTGER4, TGFBR2, ITGA2, RCAN1, FOSB, CD40, MMP14, STAT1, JUNB, FOXP2, CYBA, PDE2A, ETS1, FYN, MAPK14, IRF1, SLITRK6, GADD45A, ENG	1.7	0.00031
GO:0048010	vascular endothelial growth factor receptor signaling pathway	24	1	ACTB, NRP2, HSP90AA1, ROCK1, NCF2, ROCK2, AXL, NCKAP1L, ITGB3, NCKAP1, SHB, HHEX, SH2D2A, VEGFC, CYBA, PTK2, NEDD4, MAPK13, ITGA5, FYN, ITGAV, MAPK14, PIK3CA, FOXC1	2.1	0.00024
GO:0001654	chromosome segregation	64	2.7	KIF23, KIFC1, XPO1, PRC1, TTK, RANGAP1, AURKB, ACTR2, MEI1, RAD21, INCENP, TPR, TOP2A, STAG1, KIF14, CEP85, KIF11, PAPD7, ESPL1, RB1, GEM, UBE2C, ECT2, SRPK1, SGO2, SGO1, CLIP1, PDCD6IP, SMARCAD1, PAM, KIF4A, SLF2, AHCTF1, NR3C1, CEP55, WAPL, MAP10, NIPBL, HJURP, CENPC, BUB1, PAFAH1B1, BUB3, ERCC6L, ERCC2, APC, CKAP5, DLGAP5, KIF18A, CENPF, SMC6, KIF18B, CENPE, SPDL1, PIBF1, SMC2, CDC27, CENPI, A…	1.5	0.00037
GO:0007059	eye development	64	2.7	RHOJ, MYH15, AGTPBP1, MYO7A, GJA1, ZEB1, GLI3, TGFB1, TGFB2, ATP2B1, TSPAN12, GATA3, FOXF2, CEP290, EGFR, RARG, SIPA1L3, NECTIN3, MAN2A1, INHBA, ACVR2B, CHRDL1, SERPINF1, CLIC4, FOXC1, MFAP2, PRDM1, SLITRK6, WNT5A, PPP2R3A, WNT5B, TDRD7, VIM, SOX9, NHS, EPHB2, NIPBL, CCDC66, MEIS2, LPCAT1, SOS1, PTN, SKIL, COL8A1, GPD2, BMP4, SMG9, NES, COL4A1, TGFBR1, FBN1, EFEMP1, TGFBR2, ALMS1, SMAD3, PPP1R13L…	1.5	0.00037
GO:0044770	cell cycle phase transition	96	4.1	BACH1, CLSPN, E2F7, BTRC, BORA, IQGAP3, TTK, AURKA, TGFB1, LATS2, GTSE1, KANK2, OFD1, CDKN2D, MTBP, CEP290, MASTL, TPR, TUBA1A, PLCB1, DYNC1H1, CCNA1, KIF14, EGFR, PID1, HSP90AA1, DDB1, PIM1, TPX2, ESPL1, GPR132, CDK6, RB1, CDC5L, OPTN, MCM3, UBE2C, HMGA2, CEP152, PKIA, DCTN1, INHBA, RFWD3, CCND2, RGCC, ADAM17, CARM1, GADD45A, ACVR1, BCAT1, SDCCAG8, BLM, TICRR, FHL1, PML, CEP164, ANLN, CNTRL, ZNF…	1.4	0.00042
GO:1905114	cell surface receptor signaling pathway involved in cell-cell signaling	93	4	MEF2C, NOG, HECW1, BTRC, IGFBP6, FERMT2, TLR2, AMOTL1, AMOTL2, GLI3, LATS2, DMPK, MAP3K7, DAB2, PLCB3, TIAM1, GATA3, ILK, DLG4, YAP1, PLCB1, ASPM, EGR1, STX1A, RARG, TRABD2A, DDB1, MED12, LEF1, ARNTL, HMGA2, STK4, HHEX, MCC, TGFB1I1, LRRK2, DST, WNT5A, CAV1, PPP2R3A, WNT5B, APC2, PPP3R1, BICC1, RIMS2, SOX9, TCF7L2, TCF7L1, HIC1, SLC29A1, MACF1, HMGXB4, AGO2, BCL9L, USP34, NKX2-5, APC, BMP4, FZD8,…	1.4	0.00042
GO:0044344	cellular response to fibroblast growth factor stimulus	31	1.3	WNT5A, FGFR1, FGF5, NOG, CXCL8, IQGAP1, POLR2A, SETX, ZFP36L1, ZFP36L2, SPRY2, SPRY1, CD44, CTGF, FAT4, GATA3, SPRED2, SPRED1, FGF1, THBS1, ZFP36, FLRT3, RBFOX2, FLRT2, CBL, CDC5L, SNAI2, PTPN11, NPTN, ANOS1, SHCBP1	1.9	0.00029
GO:0033628	regulation of cell adhesion mediated by integrin	14	0.6	MUC1, PIK3CG, SWAP70, FERMT3, PODXL, NCKAP1L, SNAI2, EPHA2, TGFB2, PTPN11, LPXN, PTK2, SERPINE1, PLAU	2.8	0.00017
GO:0043534	blood vessel endothelial cell migration	20	0.9	WNT5A, BMP4, FGFR1, NOG, TBX20, ITGB4, SIX2, SMAD3, LEF1, ITGA2, ITGA3, ITGB3, HMGA2, ITGB1, EPHA2, INHBA, DKK1, FOXC1, KLF4, ACVR1	2.3	0.00023
GO:0001707	mesoderm formation	20	0.9	PRKCA, PTGS2, EFNB2, MYH9, AMOTL1, ITGB1, SLIT2, TGFB1, STARD13, VEGFC, NOTCH1, SRPX2, ROBO1, ID1, MAPK14, RGCC, NFE2L2, THBS1, HDAC9, KLF4	2.3	0.00023
GO:0044772	mitotic cell cycle phase transition	91	3.9	BACH1, CLSPN, E2F7, BTRC, BORA, IQGAP3, TTK, AURKA, TGFB1, LATS2, GTSE1, KANK2, OFD1, CDKN2D, MTBP, CEP290, MASTL, TPR, TUBA1A, PLCB1, DYNC1H1, CCNA1, KIF14, EGFR, PID1, HSP90AA1, PIM1, TPX2, ESPL1, GPR132, CDK6, RB1, OPTN, MCM3, UBE2C, HMGA2, CEP152, PKIA, DCTN1, INHBA, RFWD3, CCND2, RGCC, ADAM17, CARM1, GADD45A, ACVR1, BCAT1, SDCCAG8, BLM, TICRR, FHL1, PML, CEP164, ANLN, CNTRL, ZNF655, SFN, ITG…	1.4	0.00044
GO:0002831	regulation of response to biotic stimulus	32	1.4	PVR, MICB, AP1M1, ZC3HAV1, PML, PTPN22, IL15, SEC14L1, DOCK2, TMEM173, NOD1, AP1S2, HTRA1, DDX60, TRIM6, TRAF6, DHX58, CEACAM1, PRKCA, LY96, HLA-A, HERC5, BIRC3, DDX58, CYBA, IFIT1, CD55, MB21D1, FYN, IL12A, PRDM1, TNFAIP3	1.9	0.00031
GO:0045580	regulation of smooth muscle cell proliferation	28	1.2	BMP4, IL6, IL18, TGFBR2, ANXA1, NCKAP1L, IL15, ZEB1, IL7R, NLRP3, GLI3, TGFB1, CLPTM1, CARD11, CD83, SHB, CAMK4, GATA3, IL4R, SOS1, HLX, CYP26B1, IL12A, IRF1, PRDM1, ADAM8, FANCA, AP3B1	2	0.00029
GO:0048660	regulation of T cell differentiation	28	1.2	PTGS2, MMP9, IL18, EDN1, PPARG, IL15, TCF7L2, S1PR1, ILK, TGM2, PDGFD, THBS1, TRAF6, EGFR, BMP4, IL6, TGFBR2, ITGA2, STAT1, CYBA, EREG, AKR1B1, IL12A, HBEGF, TNFAIP3, IGFBP3, KLF4, GSTP1	2	0.00029
GO:1903530	regulation of secretion by cell	108	4.6	MEF2C, SYT1, KCNC4, SNCAIP, EDN1, TLR2, PTPN22, TLR4, ANKRD1, TLR6, TGFB1, IL17RA, IL11, TGFB2, NOV, GAB2, TIAM1, GATA3, SLC2A1, RABGEF1, RAPGEF4, ADAM8, CRY1, EGFR, IRS2, KIF5B, CD40, ARNTL, HLA-E, IRS1, MAP4K4, VEGFC, UNC13D, RGCC, PDCD6IP, PAEP, LRRK2, SSC5D, GBP1, WNT5A, FGFR1, PAM, CDK5R2, ADORA2B, GSDMD, HFE, RIMS2, LIF, RAC2, TRAF6, IL1RAPL1, SRGN, FN1, RHBDF2, CARD8, RAB8B, IL1RL1, GAS6, …	1.4	0.00046
GO:0003203	endocardial cushion morphogenesis	12	0.5	BMP4, NOTCH1, BMP2, NOG, TGFBR1, TBX20, TGFBR2, SNAI2, SOX9, ENG, ACVR1, TGFB2	3.2	0.00015
GO:0006929	substrate-dependent cell migration	12	0.5	NRP2, FMNL1, VEGFC, ROBO1, TNFRSF12A, OPHN1, ITGA2, SEMA3A, SNAI2, ADAM8, SLIT2, FN1	3.2	0.00015
GO:0016358	dendrite development	41	1.8	MEF2C, MEF2A, ASAP1, LPAR1, ZMYND8, ITPKA, ITGB1, SCARF1, IQGAP1, EPHB2, PICALM, TIAM1, BCL11A, ILK, IL1RAP, DLG4, OBSL1, PAFAH1B1, SEMA3A, ACSL4, NRG1, IL1RAPL1, DCLK1, RBFOX2, RAP2A, DNM3, KLF7, MAP1B, NLGN3, SHANK1, FARP1, FMN1, EPHA4, NEDD4, FYN, ID1, CLIP1, CARM1, LRRK2, SLITRK5, LRP4	1.7	0.00035
GO:0030307	positive regulation of cell growth	35	1.5	SYT1, TNFRSF12A, TRPV2, CRABP2, EDN1, L1CAM, SFN, RIMS2, CDH4, TGFB2, SEMA5A, BDNF, MACF1, SEMA7A, BCL11A, ILK, PAFAH1B1, ACSL4, NRG1, GOLGA4, FN1, EGFR, CPNE5, NOL8, TGFBR1, SPHK1, MAP1B, LEF1, MMP14, CYBA, ADAM17, HBEGF, SMURF1, IGFBP1, SYT17	1.8	0.00033
GO:0043393	regulation of protein binding	39	1.7	CSF3, MEF2C, WNT5A, PPARA, CAV1, NOG, MMP9, HFE, AURKA, MITD1, AURKB, TCF7L2, GTSE1, PLCL2, TMEM173, DAB2, BDNF, TIAM1, NRG1, PLXND1, BMP4, TAF1, NES, BMP2, TMC8, ROCK1, TGFBR1, LEF1, ITGA2, STK4, ANXA2, SPAG9, IFIT2, IFIT1, DKK1, CSNK1E, ID1, LRRK2, CARM1	1.7	0.00035
GO:0010771	negative regulation of cell morphogenesis involved in differentiation	29	1.2	WNT5A, NOG, FOXA2, EPHB2, TGFB2, SEMA5A, PTK2, SEMA7A, BCL11A, SEMA3E, SEMA3C, NKX2-1, SEMA3A, DNM3, ARHGEF1, ACTN4, NLGN3, STAT1, SLIT2, CORO1C, SEMA6B, MELTF, ID1, SEMA4F, TACSTD2, SEMA4C, SEMA4B, LRP4, GBP1	1.9	0.00031
GO:0032943	mononuclear cell proliferation	53	2.3	MEF2C, IL6ST, ELF4, IL18, PTPN22, TLR4, PAWR, IL15, SDC4, TGFB1, SHB, CLCF1, EBI3, PIK3CG, SATB1, IRS2, BST1, HLA-A, LEF1, CD40, HLA-E, PDCD1LG2, AHR, CARD11, PDE5A, IL12A, PRDM1, PRNP, SLC39A10, CSF1, IL7R, PLCL2, DOCK2, RAC2, SOS1, TRAF6, NFATC2, HELLS, BMP4, IL6, PELI1, CEBPB, LGALS3, ANXA1, NCKAP1L, ATAD5, ATM, CD55, CORO1A, FYN, CD59, CD274, IRF1	1.6	0.0004
GO:0048644	regulation of actin filament bundle assembly	22	0.9	WNT5A, BMP4, ACTC1, BMP2, NOG, TGFBR1, TBX20, ANKRD1, FZD2, TGFB1, TGFB2, SHOX2, LIF, NOTCH1, S1PR1, XIRP2, HEG1, FOXC1, NRG1, NKX2-5, ENG, MYLK	2.2	0.00026
GO:0032231	muscle organ morphogenesis	22	0.9	DLC1, ROCK1, PTGER4, ROCK2, SWAP70, TGFBR1, SMAD3, ALMS1, S100A10, LPAR1, SHANK1, SDC4, ARHGEF10, PPM1F, S1PR1, CTGF, TACSTD2, ID1, RGCC, PAK1, PHLDB2, SYNPO	2.2	0.00026
GO:0043367	CD4-positive, alpha-beta T cell differentiation	18	0.8	ZFP36, IL18, ANXA1, PDE4D, PAWR, MAP3K7, CARD11, CD83, EZR, GATA3, PDE4B, IL1RAP, SPTBN1, TNFAIP3, PRNP, TRAF6, RUNX1, GBP1	2.4	0.00023
GO:0032623	interleukin-2 production	18	0.8	SATB1, IL6, PTGER4, IL18, RELB, ANXA1, LEF1, NCKAP1L, RORA, NLRP3, ATP7A, STAT6, SHB, CD83, IL4R, GATA3, HLX, BCL3	2.4	0.00023
GO:0050922	negative regulation of chemotaxis	17	0.7	WNT5A, C5, SLIT2, SEMA5A, NOV, SEMA6B, NOTCH1, ROBO1, SEMA4F, SEMA7A, SEMA3E, SEMA4C, SEMA4B, SEMA3C, SEMA3A, THBS1, GSTP1	2.5	0.00022
GO:1902580	single-organism cellular localization	175	7.5	RAB3GAP2, SYT1, LYPD1, PTGS2, IL18, TSPAN5, TLR2, PTPN22, TLR4, PMAIP1, TGFB1, TGFB2, NOV, DAB2, STARD4, ANK1, MALL, ANK2, GAB2, MDFIC, TIAM1, RAE1, RABGEF1, RAB23, ASPM, EGFR, PIK3CG, PID1, TTC7A, ROCK1, KIF5B, ACTN4, ROCK2, C2CD5, SIX2, ESPL1, ACTN2, OPTN, MYH9, PKIA, BICD2, DCTN1, NPC1, CLIP1, OPHN1, LRRK2, GBP1, KIF4A, CAV1, ADORA2B, NFKBIE, NFKBIA, ITGB2, ABCA1, RIMS2, ITGB1, SEMA5A, TRAM2, …	1.3	0.00056
GO:0044839	cell cycle G2/M phase transition	42	1.8	BACH1, CLSPN, SDCCAG8, BLM, TICRR, FHL1, BTRC, BORA, CEP164, AURKA, CNTRL, OFD1, PPP1R12A, CEP290, PAFAH1B1, MASTL, TUBA1A, DYNC1H1, PLCB1, PHLDA1, KIF14, TAF2, NES, HSP90AA1, CEP135, CKAP5, TPX2, ALMS1, CENPF, GPR132, OPTN, HMGA2, CEP152, PKIA, CENPJ, DCTN1, ATM, AJUBA, PLK4, PLK3, CSNK1E, CIT	1.7	0.00039
GO:0000188	membrane assembly	11	0.5	CAV2, CAV1, STX2, S100A10, SPTBN1, NLGN2, NLGN3, RFTN1, IL1RAPL1, LRP4, ANXA2	3.4	0.00016
GO:0061037	inactivation of MAPK activity	11	0.5	DUSP5, DUSP4, DUSP18, CAV1, DUSP1, RGS4, SPRED2, SPRED1, DUSP7, GPS2, DUSP6	3.4	0.00016
GO:0061217	regulation of mesonephros development	11	0.5	BMP4, NOG, TACSTD2, GATA3, PAX8, SIX1, SIX2, SIX4, BASP1, SOX9, TGFB1	3.4	0.00016
GO:0071709	negative regulation of cartilage development	11	0.5	PTHLH, ADAMTS7, BMP4, NOG, RARG, TGFBR1, EFEMP1, ADAMTS12, SNAI2, SOX9, TGFB2	3.4	0.00016
GO:0001657	ureteric bud development	25	1.1	FGFR1, NOG, ADAMTS16, SDC4, SOX9, GLI3, TGFB1, SPRY1, OSR1, FAT4, GATA3, PAX8, ILK, FGF1, BMP4, BMP2, SMAD3, SIX4, BASP1, SLIT2, FMN1, LAMA5, TACSTD2, SIX1, FOXC1	2	0.00031
GO:0072593	reactive oxygen species metabolic process	46	2	CAV1, PXDN, PTGS2, EDN1, TLR2, HK2, TLR4, ITGB2, PMAIP1, RORA, TLR6, TGFB1, AKR1C3, RAC2, CTGF, GPX3, NRROS, PTX3, PLA2R1, THBS1, CYR61, PID1, EGFR, ICAM1, IL6, SH3PXD2A, HSP90AA1, NCF2, TGFBR2, PDK4, SMAD3, DDIT4, SOD2, ATP7A, CYBA, NNT, MAPK14, RIPK1, FBLN5, AOX1, NFE2L2, KLF2, LRRK2, GADD45A, KLF4, GSTP1	1.6	0.00042
GO:0097530	granulocyte migration	28	1.2	CXCL1, CXCL3, CSF1, EDN1, CXCL2, CXCL8, ITGB2, IL17RA, CCL26, TGFB2, CCL24, HRH1, RAC2, SAA1, PDE4B, THBS1, ADAM8, SCG2, PIK3CG, LGALS3, PTGER4, MPP1, ANXA1, ITGA1, NCKAP1L, PDE4D, SLIT2, CAMK1D	1.9	0.00034
GO:0016331	morphogenesis of embryonic epithelium	34	1.5	DLC1, WNT5A, NOG, LUZP1, SOX9, SDC4, MTHFD1L, TGFB1, TGFB2, OSR1, GATA3, PAX8, TRAF6, IPMK, BMP4, RARG, MED12, TEAD2, CELSR1, SIX4, FZD2, STK4, VASP, MIB1, HHEX, VEGFC, PRICKLE1, ADM, LAMA5, SIX1, SEMA4C, KIF20B, APAF1, SETD2	1.8	0.00037
GO:2000736	heart valve morphogenesis	13	0.6	TEAD2, SOX9, TGFB2, ZFP36L2, NOTCH1, PRICKLE1, TACSTD2, TRIM6, KDM3A, FOXC1, NFE2L2, YAP1, NKX2-5	2.9	0.00019
GO:0003179	regulation of stem cell differentiation	13	0.6	BMP4, MEF2C, BMP2, TGFBR2, TBX20, SOX9, TGFB1, TGFB2, NOTCH2, NOTCH1, GATA3, ACVR1, CYR61	2.9	0.00019
GO:0034341	response to interferon-gamma	36	1.5	WNT5A, KYNU, NMI, IFITM1, IFITM2, IFITM3, EDN1, PPARG, PML, OAS3, IFI30, OAS1, OAS2, CCL26, CCL24, NLRC5, CD44, TRIM8, ICAM1, GBP5, SP100, BST2, SOCS3, HLA-A, HLA-B, MID1, HLA-E, STAT1, IRF9, OASL, CD58, MT2A, IRF1, JAK1, GBP2, GBP1	1.8	0.00039
GO:2001234	negative regulation of apoptotic signaling pathway	44	1.9	CSF2, NOG, MCL1, MMP9, HSPA1A, IVNS1ABP, TCF7L2, PHIP, HSPH1, MEIS3, CD44, SH3GLB1, CDKN2D, ITGAV, CASP8, SERPINE1, CREB3L1, YAP1, MKL1, NRG1, THBS1, AGAP2, HELLS, SCG2, BMP4, MUC1, ICAM1, ARHGEF2, LGALS3, TGFBR1, NR4A2, LMNA, SNAI2, PLAUR, SOD2, EYA4, ITGA6, FYN, RIPK1, NFE2L2, TNFAIP3, LRRK2, GSTP1, ACVR1	1.7	0.00043
GO:0071621	granulocyte chemotaxis	26	1.1	CXCL1, CXCL3, CSF1, EDN1, CXCL2, CXCL8, ITGB2, IL17RA, TGFB2, CCL26, CCL24, HRH1, RAC2, SAA1, PDE4B, THBS1, SCG2, PIK3CG, LGALS3, MPP1, ANXA1, ITGA1, NCKAP1L, PDE4D, SLIT2, CAMK1D	2	0.00034
GO:0001823	mesonephros development	26	1.1	FGFR1, NOG, ADAMTS16, SDC4, SOX9, GLI3, TGFB1, SPRY1, OSR1, FAT4, GATA3, PAX8, ILK, FGF1, BMP4, BMP2, SMAD3, SIX2, SIX4, BASP1, SLIT2, FMN1, LAMA5, TACSTD2, SIX1, FOXC1	2	0.00034
GO:0032409	regulation of transporter activity	43	1.8	CTTNBP2NL, MEF2C, CAV1, KMT2A, FHL1, MMP9, PPARG, CACNB1, CACNB4, FXYD5, GSTM2, OSR1, ANK2, STAC, WNK4, PDE4B, DLG4, PCSK9, ASPH, AHNAK, GLRX, CACNA2D1, SGK1, ACTN4, KIF5B, NLGN2, PDE4D, NLGN3, ACTN2, OXSR1, CTSS, PRKCE, SHANK1, STOM, RASGRF1, NEDD4, CNIH3, RIPK1, PLCG2, GNB5, TCAF2, TCAF1, CRACR2A	1.7	0.00043
GO:0050670	regulation of lymphocyte proliferation	42	1.8	MEF2C, IL6ST, SLC39A10, IL18, PTPN22, TLR4, IL15, PAWR, SDC4, TGFB1, RAC2, CLCF1, SOS1, TRAF6, NFATC2, EBI3, BMP4, IL6, PELI1, IRS2, CEBPB, LGALS3, BST1, ANXA1, HLA-A, NCKAP1L, ATAD5, CD40, HLA-E, AHR, ATM, PDCD1LG2, CARD11, CD55, CORO1A, CD59, CD274, PDE5A, IL12A, IRF1, PRDM1, PRNP	1.7	0.00044
GO:0006970	response to osmotic stress	19	0.8	SLC12A6, EGFR, ARHGEF2, HSP90AA1, LRRC8A, TACR3, RELB, ITGA2, OXSR1, AQP1, ZFP36L1, PLK3, OSR1, HNMT, MAPK13, SLC2A1, ERRFI1, MYLK, RCSD1	2.3	0.00029
GO:0003198	epithelial to mesenchymal transition involved in endocardial cushion formation	9	0.4	BMP4, NOTCH1, NOG, TGFBR1, TGFBR2, SNAI2, ENG, ACVR1, TGFB2	4	0.00013
GO:1901798	positive regulation of signal transduction by p53 class mediator	9	0.4	SH3GLB1, HEXIM1, SPRED2, ANKRD1, SPRED1, PMAIP1, PLA2R1, ATM, HIC1	4	0.00013
GO:1902667	regulation of axon guidance	14	0.6	WNT5A, PLXNC1, PLXNA2, SLIT2, SEMA5A, SEMA6B, SEMA4F, SEMA7A, SEMA3E, SEMA4C, SEMA4B, SEMA3C, SEMA3A, PLXND1	2.8	0.00023
GO:0016311	dephosphorylation	77	3.3	CTTNBP2NL, MEF2C, DLC1, PDP1, NUAK1, BTRC, SYNJ1, PPIP5K2, PTPN22, PTPN21, IQGAP1, TGFB1, TGFB2, SYNJ2, DNAJC6, MASTL, SPRED1, NT5E, PTPRK, SYMPK, PDPR, ROCK1, PTPRG, ROCK2, PTPRH, MYH3, FBP1, SPOCD1, LPIN1, FARP1, PPM1F, EYA4, TNS2, CNEP1R1, INPP4B, INPP4A, PPP1R15A, CCDC8, INPP1, PLPP4, PPP2R3A, SLC39A10, PFKFB3, ACP7, PPP3R1, DUSP11, DUSP18, PPP1R3C, UBASH3B, PPP1R12A, INPP5F, MTMR6, RBM26, PT…	1.4	0.00055
GO:0072163	mesonephric tubule development	25	1.1	FGFR1, NOG, ADAMTS16, SDC4, SOX9, GLI3, TGFB1, SPRY1, OSR1, FAT4, GATA3, PAX8, ILK, FGF1, BMP4, BMP2, SMAD3, SIX4, BASP1, SLIT2, FMN1, LAMA5, TACSTD2, SIX1, FOXC1	2	0.00037
GO:0072164	mesonephric epithelium development	25	1.1	FGFR1, NOG, ADAMTS16, SDC4, SOX9, GLI3, TGFB1, SPRY1, OSR1, FAT4, GATA3, PAX8, ILK, FGF1, BMP4, BMP2, SMAD3, SIX4, BASP1, SLIT2, FMN1, LAMA5, TACSTD2, SIX1, FOXC1	2	0.00037
GO:0090109	regulation of cell-substrate junction assembly	16	0.7	DLC1, ROCK1, ROCK2, S100A10, SMAD3, MMP14, SDC4, IQGAP1, PPM1F, FMN1, CORO1C, PTK2, MACF1, SLK, THBS1, PHLDB2	2.5	0.00028
GO:0051893	regulation of focal adhesion assembly	16	0.7	DLC1, ROCK1, ROCK2, S100A10, SMAD3, MMP14, SDC4, IQGAP1, PPM1F, FMN1, CORO1C, PTK2, MACF1, SLK, THBS1, PHLDB2	2.5	0.00028
GO:0002011	morphogenesis of an epithelial sheet	16	0.7	WNT5A, FLRT3, TBX20, LIN7C, FLNA, COL5A1, ARHGAP12, AJUBA, NOTCH1, ITGA5, SOS1, ADAM17, HBEGF, PHLDB2, CEACAM1, CYR61	2.5	0.00028
GO:1903533	regulation of protein targeting	58	2.5	PTGS2, IL18, TLR2, PTPN22, TLR4, GLI3, TGFB1, NOV, TMEM173, DAB2, MDFIC, NBPF3, RAB23, TPR, NRG1, EGFR, HSP90AA1, C2CD5, ZDHHC8, UGCG, NLRP3, PKIA, ECT2, FLNA, STOM, GNAQ, HHAT, LRRK2, CSF3, APC2, NFKBIE, ABLIM3, PPP3R1, NFKBIA, SEMA5A, HNMT, RAC2, SH3GLB1, BCL3, MTCL1, BMP4, IL6, TGFBR1, HCLS1, SPHK1, SMAD3, SNAI2, WWTR1, GAS6, FZD7, DDX58, RGS20, PDE2A, MAPK14, TCAF2, TCAF1, TRIP6, SLC17A9	1.5	0.00054
GO:0007420	brain development	115	4.9	MEF2C, DLC1, SYT1, NOG, PLXNA2, LPAR1, RORA, AQP1, ATP2B1, S1PR1, SERPINE2, ROBO1, SEMA7A, CEP290, AFDN, ASPM, EGFR, RBFOX2, SATB2, IRS2, PTPRG, BCL2A1, BASP1, DDIT4, HHEX, LRRK2, SMARCA1, EXT1, SLITRK5, WNT5A, FGFR1, C11ORF63, SLC38A2, CDK5R2, PFKFB3, ITGB1, NR2C2, EPHB2, SEMA5A, NIPBL, B3GNT5, HNMT, NKX2-1, LAMB1, BMP4, TAF1, SMG9, BMP2, TGFBR2, SPHK1, NR4A2, BRCA2, ARMC4, ATM, FOXP2, PTPN11, H…	1.3	0.00065
GO:1901184	regulation of ERBB signaling pathway	23	1	SATB1, IL6, PTGER4, IL18, TGFBR2, RELB, ANXA1, NCKAP1L, LEF1, RORA, NLRP3, GLI3, ATP7A, STAT6, SHB, CD83, HLX, IL4R, GATA3, IRF1, BCL3, PRDM1, AP3B1	2.1	0.00036
GO:0046632	alpha-beta T cell differentiation	23	1	RHBDF2, EGFR, MMP9, CBL, ITGA1, SOCS4, AFAP1L2, FER, GPRC5A, PTPN12, PLAUR, SPRY2, DOK1, SPRY1, EREG, PTK6, SOS1, ZFYVE28, SH3KBP1, ADAM17, SH3TC2, ERRFI1, CEACAM1	2.1	0.00036
GO:0003006	developmental process involved in reproduction	108	4.6	NOG, PTGS2, FSTL3, AURKA, TGFB1, TGFB2, MEI1, SHB, SERPINE2, HTRA1, GATA3, FOXF2, DDX20, FNDC3A, ASPM, EGFR, RARG, SOCS3, PLD6, SIX4, BASP1, STK4, JUNB, SERPINF1, PDE5A, ASB1, STC1, PRDM1, WNT5A, DIAPH2, PAQR7, PAQR8, SOX9, PAQR5, LIF, PTK2, PEG10, NIPBL, ITGB8, NKX2-1, BMP4, PLAG1, EPAS1, TGFBR1, ALMS1, BRCA2, ATM, PTPN11, CYP7B1, NOTCH1, PLK4, AREG, ARID4A, E2F7, PPARG, ARID4B, AKR1C3, OSR1, CA…	1.3	0.00066
GO:0007498	mesoderm development	30	1.3	WNT5A, FGFR1, NOG, TBX20, ITGB4, ITGB3, ITGB1, ZFP36L1, OSR1, YAP1, TIE1, BMP4, SIX2, LEF1, SMAD3, ITGA2, HES7, TEAD2, ITGA3, HMGA2, EPHA2, INHBA, ACVR2B, DKK1, ETS2, FOXC1, EXT1, SETD2, KLF4, ACVR1	1.9	0.00043
GO:0048017	inositol lipid-mediated signaling	40	1.7	CSF3, FGFR1, FGF5, PDGFA, IL18, EDN1, SOX9, TGFB2, ZFP36L1, PTK2, EZR, SERPINE2, GAB2, GATA3, INPP5F, PIK3CA, AGO2, PDGFC, PDGFD, OGT, NRG1, FGF1, AGAP2, STAMBP, PIK3CG, EGFR, PLD1, IRS2, LTK, HCLS1, CBL, RICTOR, PRR5L, IRS1, PTPN11, EREG, NEDD4, FYN, HBEGF, KLF4	1.7	0.0005
GO:0045055	regulated exocytosis	56	2.4	SYT1, TLN1, FAM3C, PDGFA, F13A1, SYNJ1, FER, TGFB1, VCL, TGFB2, GAB2, BRPF3, TRIM9, IL4R, SERPINE1, SNPH, RABGEF1, SERPINA1, RAPGEF4, CEACAM1, PIK3CG, STX1A, STX2, ACTN4, RPH3AL, ACTN1, ACTN2, PCDH7, FLNA, VEGFC, RAB11FIP5, UNC13D, TMSB4X, LRRK2, PROS1, CDK5R2, ADORA2B, ITGB3, RIMS2, TIMP1, LGALS3BP, RAC2, THBS1, STX11, QSOX1, SRGN, FN1, PHACTR2, ECM1, ANXA3, GAS6, NOTCH1, RAB31, CORO1A, SYTL3, S…	1.5	0.00057
GO:0002366	leukocyte activation involved in immune response	44	1.9	IL27RA, ADORA2B, IL18, TLR4, FER, RORA, APBB1IP, TGFB1, PLCL2, STAT6, SHB, DOCK2, RAC2, GAB2, CLCF1, GATA3, IL4R, HLX, RABGEF1, BCL3, CEACAM1, EXO1, PIK3CG, ICAM1, IL6, PTGER4, LGALS3, SWAP70, MSH2, LGALS1, RELB, ANXA1, LEF1, ATAD5, CD40, LIG4, PRKCE, NLRP3, ANXA3, ATP7A, NOTCH2, CORO1A, UNC13D, PLCG2	1.6	0.00053
GO:0048704	embryonic skeletal system morphogenesis	24	1	MEF2C, BMP4, NOG, SATB2, TGFBR1, TGFBR2, MED12, SIX2, SMAD3, ZEB1, SIX4, MMP14, GLI3, MTHFD1L, HOXB3, SHOX2, NIPBL, OSR1, HOXD3, SIX1, HOXD4, CHST11, SETD2, RUNX2	2	0.0004
GO:0044702	single organism reproductive process	192	8.2	KIFC1, NOG, PTGS2, ADCY7, MMP9, EDN1, FSTL3, TTK, AURKA, TGFB1, SETX, TGFB2, KCNU1, SHB, MEI1, RAD21, SERPINE2, HTRA1, GATA3, FOXF2, DDX20, CCNA1, FNDC3A, ASPM, EGFR, RARG, PLD6, SOCS3, CRTAP, ESPL1, MFGE8, UBR2, ARNTL, SIX4, BASP1, MYH9, STK4, JUNB, SPAG9, SGO2, SERPINF1, SGO1, KIAA1524, SPAG4, PDE5A, CATSPER1, ASB1, STC1, HAS2, MST1R, PRDM1, WFDC2, WNT5A, PAM, TDRD7, DIAPH2, SLC2A14, DIAPH3, PA…	1.2	0.00075
GO:0002218	activation of innate immune response	50	2.1	CAV1, IFIH1, ZC3HAV1, BTRC, TLR2, PTPN22, NFKBIA, TLR4, ITGB2, HSPA1A, TLR6, SEC14L1, MAP3K7, IRAK3, TMEM173, NOD1, NR1D1, MAP3K1, DDX60, CASP8, PAK1, TRAF6, ADAM8, TNIP1, CHUK, DHX58, IRAK2, PELI1, LY96, ICAM2, RELB, ERBIN, CTSS, IFI16, BIRC3, PRKCE, RFTN1, PSMB8, TANK, PSMB9, DDX58, CARD11, CYBA, FYN, MB21D1, RIPK1, PLCG2, IRF1, TNFAIP3, DMBT1	1.6	0.00057
GO:2001233	regulation of apoptotic signaling pathway	70	3	NOG, MMP9, PMAIP1, TNFSF12, TGFB2, HSPH1, SRPX, CD44, GSN, CDKN2D, CASP8, SERPINE1, CREB3L1, YAP1, MKL1, NRG1, AGAP2, ICAM1, ARHGEF2, SP100, STK4, PLAUR, EYA4, INHBA, RIPK1, CTSC, G0S2, NFE2L2, LRRK2, TNFAIP3, GSTP1, ACVR1, TRAF1, FGFR1, CSF2, CAV1, MCL1, TNFRSF12A, PPP3R1, PML, HSPA1A, SFN, IVNS1ABP, TCF7L2, PHIP, MEIS3, SH3GLB1, ITGAV, SKIL, THBS1, HELLS, ACSL5, SCG2, MUC1, BMP4, DFNA5, TMC8, L…	1.5	0.00064
GO:0046651	lymphocyte proliferation	52	2.2	MEF2C, ELF4, IL6ST, IL18, PTPN22, TLR4, PAWR, IL15, SDC4, TGFB1, SHB, CLCF1, EBI3, PIK3CG, SATB1, IRS2, BST1, HLA-A, LEF1, CD40, HLA-E, PDCD1LG2, AHR, CARD11, PDE5A, IL12A, PRDM1, PRNP, SLC39A10, IL7R, PLCL2, DOCK2, RAC2, SOS1, NFATC2, TRAF6, HELLS, BMP4, PELI1, IL6, CEBPB, LGALS3, ANXA1, NCKAP1L, ATAD5, ATM, CORO1A, CD55, FYN, CD59, CD274, IRF1	1.6	0.00059
GO:0001886	endothelial cell morphogenesis	7	0.3	COL18A1, ID1, CLIC4, PLOD3, MET, HEG1, STC1	5.1	0.0001
GO:0048841	regulation of axon extension involved in axon guidance	13	0.6	WNT5A, PLXNC1, PLXNA2, SEMA5A, SEMA6B, SEMA4F, SEMA7A, SEMA3E, SEMA4C, SEMA4B, SEMA3C, SEMA3A, PLXND1	2.9	0.00027
GO:0031668	cellular response to extracellular stimulus	40	1.7	CAV1, SLC38A2, FOXA2, ADORA2B, ATG14, TNC, GSDMD, PPARG, UPP1, HFE, IL15, PMAIP1, KANK2, ATP2B1, ASGR1, AKR1C3, SH3GLB1, SLC2A1, PTN, PCSK9, DAP, FOSL1, ICAM1, IL6, KLF10, CBL, PDK4, NR4A2, PIM1, AXL, BRIP1, IFI16, SNAI2, GAS6, UCN2, ITGA6, UCP2, NFE2L2, LRRK2, GSTP1	1.7	0.00055
GO:0061333	renal tubule morphogenesis	21	0.9	MEF2C, BMP4, NOG, BMP2, COL4A1, ADAMTS16, SIX4, SOX9, GLI3, TGFB1, FMN1, OSR1, FAT4, TACSTD2, LAMA5, WNK4, GATA3, PAX8, SIX1, ILK, FGF1	2.2	0.00041
GO:0032271	regulation of protein polymerization	39	1.7	CSF3, ARHGAP18, ABI2, FER, CCL26, CCL24, ACTR2, CDC42EP2, CDC42EP1, GSN, TMSB15B, WIPF1, CDC42EP3, RASA1, ICAM1, HCLS1, NCKAP1L, TMSB10, RICTOR, PRKCE, MYADM, DCTN1, SLIT2, VASP, NCKAP1, EML2, FMN1, CORO1A, EPS8, GMFG, CAPG, FHOD3, FCHSD2, TMOD3, CLIP1, SPTBN1, TMSB4X, FCHSD1, SPTAN1	1.7	0.00056
GO:0007062	sister chromatid cohesion	30	1.3	XPO1, SLF2, AHCTF1, RANGAP1, AURKB, WAPL, RAD21, NIPBL, INCENP, CENPC, BUB1, PAFAH1B1, BUB3, ERCC6L, STAG1, CKAP5, PAPD7, KIF18A, CENPF, SPDL1, ESPL1, CENPE, RB1, CENPI, SMC3, ATRX, SGO2, SGO1, KNL1, CLIP1	1.9	0.0005
GO:0016055	Wnt signaling pathway	83	3.5	NOG, HECW1, BTRC, IGFBP6, FERMT2, TLR2, AMOTL1, GLI3, AMOTL2, LATS2, MAP3K7, DAB2, PLCB3, TIAM1, GATA3, ILK, YAP1, PLCB1, ASPM, EGR1, RARG, TRABD2A, DDB1, MED12, LEF1, ARNTL, HMGA2, STK4, HHEX, MCC, TGFB1I1, LRRK2, DST, WNT5A, CAV1, PPP2R3A, WNT5B, APC2, PPP3R1, BICC1, SOX9, TCF7L2, TCF7L1, HIC1, MACF1, HMGXB4, AGO2, BCL9L, USP34, NKX2-5, APC, FZD8, BMP2, GNAO1, CSNK1A1L, NR4A2, SMAD3, FZD2, CELS…	1.4	0.00072
GO:0061640	cytoskeleton-dependent cytokinesis	14	0.6	STAMBP, KIF23, SNX9, KIF4A, ANLN, AURKB, CEP55, MITD1, ACTR2, KIF20B, SPTBN1, SNX33, RASA1, APC	2.7	0.00031
GO:0050731	positive regulation of peptidyl-tyrosine phosphorylation	36	1.5	CSF3, CSF2, IL6ST, IL18, CSPG4, AFAP1L2, ITGB3, IL15, IQGAP1, TGFB1, IL11, IL31RA, LIF, HSPH1, CD44, CLCF1, PTK6, NRG1, EHD4, ICAM1, IL6, ARHGEF2, SOCS3, HCLS1, PIBF1, CD40, RICTOR, GAS6, VEGFC, EREG, ITGA5, FYN, IL12A, CNTN1, ADAM17, LRP4	1.7	0.00056
GO:1905007	positive regulation of epithelial to mesenchymal transition involved in endocardial cushion formation	5	0.2	TGFBR1, TGFBR2, ENG, ACVR1, TGFB2	7.9	3.2e-05
GO:0048701	embryonic cranial skeleton morphogenesis	15	0.6	BMP4, MEF2C, TGFBR1, TGFBR2, MED12, SIX2, SMAD3, SIX4, MMP14, MTHFD1L, NIPBL, SIX1, CHST11, SETD2, RUNX2	2.6	0.00034
GO:0050768	negative regulation of neurogenesis	49	2.1	NOG, LPAR1, GLI3, TGFB1, EDNRB, SEMA7A, SEMA3E, SEMA3C, IL15RA, SEMA3A, NRG1, ASPM, NR2F1, GPR173, ARHGEF2, ARHGEF1, PTPRG, HMG20A, HMGA2, SLIT2, MAP4K4, MIB1, SEMA4F, SEMA4C, SEMA4B, CARM1, PMP22, WNT5A, VIM, ASAP1, SOX9, EPHB2, SEMA5A, PTK2, BCL11A, PTN, INPP5F, PAFAH1B1, DNM3, LGALS1, NLGN3, NKX6-1, EPHA4, SEMA6B, NOTCH1, LRP1, ID1, KCTD11, LRP4	1.6	0.00064
GO:0198738	cell-cell signaling by wnt	83	3.5	NOG, HECW1, BTRC, IGFBP6, FERMT2, TLR2, AMOTL1, GLI3, AMOTL2, LATS2, MAP3K7, DAB2, PLCB3, TIAM1, GATA3, ILK, YAP1, PLCB1, ASPM, EGR1, RARG, TRABD2A, DDB1, MED12, LEF1, ARNTL, HMGA2, STK4, HHEX, MCC, TGFB1I1, LRRK2, DST, WNT5A, CAV1, PPP2R3A, WNT5B, APC2, PPP3R1, BICC1, SOX9, TCF7L2, TCF7L1, HIC1, MACF1, HMGXB4, AGO2, BCL9L, USP34, NKX2-5, APC, FZD8, BMP2, GNAO1, CSNK1A1L, NR4A2, SMAD3, FZD2, CELS…	1.4	0.00077
GO:0032091	regulation of organ growth	22	0.9	PPARA, NES, NOG, CAV1, TMC8, ROCK1, HFE, LEF1, AURKA, AURKB, MITD1, GTSE1, ANXA2, SPAG9, IFIT2, IFIT1, DAB2, DKK1, CSNK1E, ID1, LRRK2, CARM1	2.1	0.00046
GO:0051781	positive regulation of cell division	22	0.9	KIF23, KIF14, FGF5, PDGFA, PKN2, AURKB, PRKCE, ECT2, TGFB1, TGFB2, CSPP1, VEGFC, MAP10, EREG, SVIL, KIF20B, CENPV, PTN, PDGFC, PDGFD, FGF1, CIT	2.1	0.00046
GO:0046620	negative regulation of protein binding	22	0.9	MEF2C, FGFR1, NOG, TGFBR1, TBX20, TGFBR2, EDN1, GJA1, WWC2, BASP1, STK4, LATS2, PTK2, NOTCH1, HLX, MAPK14, FOXC1, YAP1, NRG1, CARM1, NKX2-5, DUSP6	2.1	0.00046
GO:0002263	cell activation involved in immune response	44	1.9	IL27RA, ADORA2B, IL18, TLR4, FER, RORA, APBB1IP, TGFB1, PLCL2, STAT6, SHB, DOCK2, RAC2, GAB2, CLCF1, GATA3, IL4R, HLX, RABGEF1, BCL3, CEACAM1, EXO1, PIK3CG, ICAM1, IL6, PTGER4, LGALS3, SWAP70, MSH2, LGALS1, RELB, ANXA1, LEF1, ATAD5, CD40, LIG4, PRKCE, NLRP3, ANXA3, ATP7A, NOTCH2, CORO1A, UNC13D, PLCG2	1.6	0.00065
GO:0000086	G2/M transition of mitotic cell cycle	39	1.7	BACH1, CLSPN, SDCCAG8, BLM, TICRR, FHL1, BTRC, BORA, CEP164, AURKA, CNTRL, OFD1, PPP1R12A, CEP290, PAFAH1B1, MASTL, TUBA1A, DYNC1H1, PLCB1, PHLDA1, TAF2, NES, HSP90AA1, CEP135, CKAP5, TPX2, ALMS1, GPR132, OPTN, HMGA2, CEP152, CENPJ, DCTN1, ATM, AJUBA, PLK4, PLK3, CSNK1E, CIT	1.7	0.00062
GO:0060070	canonical Wnt signaling pathway	55	2.3	HECW1, NOG, IGFBP6, GLI3, LATS2, DAB2, GATA3, ILK, YAP1, ASPM, EGR1, RARG, MED12, LEF1, ARNTL, STK4, MCC, LRRK2, WNT5A, CAV1, WNT5B, PPP2R3A, APC2, BICC1, SOX9, TCF7L2, TCF7L1, BCL9L, USP34, NKX2-5, APC, FZD8, BMP2, NR4A2, SMAD3, FZD2, SNAI2, WWTR1, FZD4, PSMB8, FZD7, PSMB9, DKK3, NOTCH1, RGS20, DKK1, PRICKLE1, CSNK1E, MAPK14, HOXB9, SMURF2, IGFBP1, KLF4, LRP4, IGFBP4	1.5	0.00071
GO:0030856	regulation of epithelial cell differentiation	29	1.2	KIAA1109, CAV1, ZEB1, SFN, SOX9, ZFP36L1, LIF, S1PR3, OSR1, FAT4, GATA3, PAX8, PPP1R12A, YAP1, ERRFI1, CEACAM1, ZFP36, BMP4, MAFF, ROCK1, ROCK2, ARNTL, WWTR1, STAT1, NKX6-1, NOTCH1, NCOA3, PRLR, ID1	1.9	0.00055
GO:0072215	endocardial cushion formation	10	0.4	BMP4, NOTCH1, NOG, TGFBR1, TBX20, TGFBR2, SNAI2, ENG, ACVR1, TGFB2	3.5	0.00024
GO:0071295	cellular response to vitamin	10	0.4	LIF, EGR1, BMP4, FAT4, PDGFA, PAX8, YAP1, BASP1, WWTR1, STAT1	3.5	0.00024
GO:0003272	regulation of metanephros development	10	0.4	ATP2B1, TNC, PPARG, PIM1, BRIP1, PTN, IL15, SNAI2, GAS6, KANK2	3.5	0.00024
GO:0002698	phosphatidylinositol 3-kinase signaling	25	1.1	MICB, HFE, FER, IL7R, TGFB1, SEC14L1, TGFB2, IRAK3, CD96, HTRA1, IL4R, HLX, RABGEF1, DHX58, CEACAM1, LGALS3, BST2, HLA-A, ANXA1, C4BPB, HLA-B, HLA-E, CD55, IFIT1, CD59	2	0.00052
GO:0014065	negative regulation of immune effector process	25	1.1	CSF3, FGFR1, PDGFA, IL18, EDN1, SOX9, TGFB2, ZFP36L1, PTK2, SERPINE2, GATA3, PDGFC, PDGFD, NRG1, AGAP2, STAMBP, PIK3CG, LTK, HCLS1, CBL, PRR5L, IRS1, FYN, NEDD4, KLF4	2	0.00052
GO:0007389	pattern specification process	78	3.3	GNA13, MEF2C, NRP2, NOG, FOXA2, PLXNA2, EDN1, TBX20, GJA1, AURKA, ZEB1, GLI3, OFD1, EDNRA, OSR1, PAX8, SEMA3E, SEMA3C, SEMA3A, SATB2, EGR2, RARG, DAW1, PLD6, PGAP1, MICAL2, MED12, LEF1, SIX2, HES7, BASP1, STK4, RTTN, MIB1, HHEX, ACVR2B, CRKL, HOXD3, SIX1, HOXD4, STC1, FOXC1, ACVR1, WNT5A, DNAH11, PPP2R3A, APC2, KMT2A, BICC1, CYP26B1, NKX2-1, PLXND1, PCSK5, NKX2-5, APC, BMP4, BMP2, COL4A1, TGFBR1,…	1.4	0.0008
GO:0030100	regulation of endocytosis	42	1.8	WNT5A, CAV1, SNAP91, C3, SYNJ1, PPARG, HFE, TGFB1, DOCK2, DAB2, PICALM, SMAP1, ITGAV, SERPINE1, RABGEF1, DLG4, DNAJC6, PCSK9, CNN2, PTX3, ANO6, EHD4, ACTN4, LGALS3, CBL, RUFY1, AXL, NCKAP1L, ITGA2, C4BPB, MFGE8, GAS6, ANXA2, MIB1, CYBA, DKK1, PLCG2, OPHN1, SNX33, ANKFY1, ABL2, CAMK1D	1.7	0.00067
GO:0048016	inositol phosphate-mediated signaling	12	0.5	BMP4, FGFR1, INHBA, DKK1, ITGB4, SIX2, ITGA2, ITGA3, ITGB3, HMGA2, ITGB1, KLF4	3	0.00031
GO:0048333	mesodermal cell differentiation	12	0.5	PLCE1, HRH1, EDN1, PPP3R1, LMCD1, RCAN1, NFATC2, ITPR3, NRG1, PRNP, ITPR1, ITPR2	3	0.00031
GO:0090286	cytoskeletal anchoring at nuclear membrane	6	0.3	SYNE3, SYNE1, SYNE2, SPAG4, SUN2, SUN3	6	8.9e-05
GO:2000696	regulation of epithelial cell differentiation involved in kidney development	8	0.3	LIF, OSR1, FAT4, GATA3, PAX8, YAP1, WWTR1, STAT1	4.2	0.00018
GO:0051348	negative regulation of transferase activity	66	2.8	STK38, FOXA2, PPARG, PTPN22, SPRY4, LATS2, SPRY2, SHB, SPRY1, CDKN2D, ILK, SPRED2, SPRED1, ERRFI1, CEACAM1, ZFP36, CEP85, IRS2, SOCS3, SOCS4, RB1, UBE2C, PKIA, PPM1F, HHEX, GNAQ, ZFYVE28, GADD45B, TNFAIP3, GADD45A, GSTP1, MVP, CAV1, DBNDD2, PML, SFN, GPRC5A, TRIB2, IRAK3, DUSP18, UBASH3B, HEXIM1, PTK6, FBXO43, BUB3, APC, FLRT3, BMP4, FLRT2, IL6, CBL, WWTR1, CDC27, PSMB8, PSMB9, GPS2, SH3BP5, AJUB…	1.5	0.00081
GO:0048015	phosphatidylinositol-mediated signaling	39	1.7	CSF3, FGFR1, FGF5, PDGFA, IL18, EDN1, SOX9, TGFB2, ZFP36L1, PTK2, EZR, SERPINE2, GAB2, GATA3, INPP5F, PIK3CA, AGO2, PDGFC, PDGFD, OGT, NRG1, FGF1, AGAP2, STAMBP, PIK3CG, EGFR, IRS2, LTK, HCLS1, CBL, RICTOR, PRR5L, IRS1, PTPN11, EREG, NEDD4, FYN, HBEGF, KLF4	1.7	0.0007
GO:0048634	cardiac ventricle development	28	1.2	MEF2C, WNT5A, NOG, LTBP1, TBX20, LUZP1, C5ORF42, TGFB1, TGFB2, GATA3, HEG1, SEMA3C, NRG1, NKX2-5, CYR61, BMP4, TGFBR1, TGFBR2, FZD2, PPP1R13L, NOTCH1, XIRP2, FOXC1, PRDM1, LRP2, ENG, RBM15, ACVR1	1.9	0.00061
GO:0003231	regulation of muscle organ development	28	1.2	MEF2C, FGFR1, NOG, TBX20, EDN1, GJA1, TGFB1, CYP26B1, SOX15, NRG1, NKX2-5, BMP4, BMP2, IL6, TGFBR1, TGFBR2, EFNB2, SMAD3, LEF1, CENPF, ARNTL, SIX4, SHOX2, NOTCH1, DKK1, MAPK14, SIX1, HDAC9	1.9	0.00061
GO:0032611	interleukin-1 beta production	17	0.7	WNT5A, EGR1, CARD8, GBP5, GSDMD, PML, SMAD3, TLR4, IFI16, ABCA1, NLRP3, TLR6, NLRP1, NOD1, TNFAIP3, ERRFI1, GSTP1	2.4	0.00046
GO:0032964	collagen biosynthetic process	13	0.6	BMP4, IL6, PPARG, ITGA2, SERPINH1, COL5A1, TGFB1, TRAM2, CTGF, RGCC, CREB3L1, ERRFI1, ENG	2.8	0.00037
GO:0010469	regulation of receptor activity	29	1.2	MEF2C, LYPD1, CAV1, HFE, GPRC5A, GSTM2, SERPINE1, DLG4, PCSK9, ASPH, ERRFI1, TAF1, CBL, NLGN2, SOCS4, ACTN2, NLGN3, PDE4D, PRKCE, SHANK1, ANXA2, STOM, NCOA3, EREG, RASGRF1, CNIH3, ZFYVE28, ADAM17, PLAU	1.9	0.00064
GO:0045445	myoblast differentiation	20	0.9	BMP4, MEF2C, EPAS1, LGALS1, IL18, RB1, MBNL1, SOX9, TCF7L2, NR2C2, TGFB1, FLT3LG, NOTCH1, PRICKLE1, MAPK14, ILK, SOX15, PLCB1, NRG1, IGFBP3	2.2	0.00052
GO:0051983	regulation of epidermal growth factor receptor signaling pathway	22	0.9	RHBDF2, EGFR, MMP9, CBL, ITGA1, SOCS4, AFAP1L2, FER, GPRC5A, PTPN12, PLAUR, SPRY2, DOK1, SPRY1, EREG, PTK6, SOS1, ZFYVE28, SH3KBP1, ADAM17, ERRFI1, CEACAM1	2.1	0.00055
GO:0006939	regulation of chromosome segregation	22	0.9	ROCK1, TACR3, ADORA2B, PTGS2, ROCK2, SPHK1, EDN1, RAP1GDS1, ITGA2, PDE4D, DOCK5, DOCK4, EDNRA, EDNRB, SMTN, HTR7, ARHGAP42, ADRA1B, MYH11, TBXA2R, HTR1D, MYLK	2.1	0.00055
GO:0042058	smooth muscle contraction	22	0.9	MKI67, DLGAP5, SLF2, TTK, CENPF, SMC6, CENPE, ESPL1, RB1, AURKB, UBE2C, ECT2, CDC27, ATM, ATRX, WAPL, RAD21, DUSP1, BUB1, TPR, BUB3, APC	2.1	0.00055
GO:0007416	synapse assembly	30	1.3	WNT5A, PCDHB11, EPHB2, NRCAM, PTK2, BDNF, DNER, PCDHB16, IL1RAP, AGRN, NRG1, PLXND1, IL1RAPL1, PCDHB9, FLRT3, DNM3, FLRT2, NLGN2, PCDHB2, NLGN3, SIX4, TPBG, FARP1, AMIGO2, SRPX2, SIX1, NPTN, SLITRK6, SLITRK5, LRP4	1.8	0.00066
GO:0031348	negative regulation of defense response	34	1.5	PPARA, MICB, NMI, PPARG, RORA, SEC14L1, NOV, NLRC5, CD96, IRAK3, HTRA1, SAA1, GATA3, RABGEF1, NT5E, DHX58, CEACAM1, ZFP36, PTGER4, SOCS3, HLA-A, SMAD3, HLA-B, IFI16, HLA-E, NLRP3, IFIT1, SERPINF1, ETS1, METRNL, GPR17, TNFAIP3, KLF4, GSTP1	1.8	0.0007
GO:0043535	regulation of blood vessel endothelial cell migration	16	0.7	PRKCA, PTGS2, AMOTL1, EPHA2, TGFB1, STARD13, VEGFC, NOTCH1, SRPX2, MAPK14, RGCC, SH3BGRL3, NFE2L2, THBS1, HDAC9, KLF4	2.4	0.00046
GO:1903391	regulation of adherens junction organization	16	0.7	DLC1, ROCK1, ROCK2, S100A10, SMAD3, MMP14, SDC4, IQGAP1, PPM1F, FMN1, CORO1C, PTK2, MACF1, SLK, THBS1, PHLDB2	2.4	0.00046
GO:0014066	regulation of phosphatidylinositol 3-kinase signaling	32	1.4	CSF3, IER3, FGFR1, FGF5, PDGFA, IL18, SOX9, TGFB2, PTK2, SERPINE2, PIK3CA, PDGFC, PDGFD, NRG1, FGF1, AGAP2, CEACAM1, STAMBP, EGFR, IRS2, HCLS1, CBL, PRR5L, IRS1, PTPN11, EREG, NEDD4, FYN, HBEGF, PIP4K2A, KLF4, FBXL2	1.8	0.00069
GO:0042093	endochondral bone morphogenesis	15	0.6	BMP4, MEF2C, RARG, COL13A1, TGFBR2, MMP14, SOX9, SERPINH1, SHOX2, NAB2, COL27A1, NAB1, STC1, CARM1, RUNX2	2.5	0.00044
GO:0060350	T-helper cell differentiation	15	0.6	IL6, PTGER4, IL18, RELB, ANXA1, LEF1, RORA, NLRP3, ATP7A, STAT6, SHB, IL4R, GATA3, HLX, BCL3	2.5	0.00044
GO:2000352	negative regulation of endothelial cell apoptotic process	11	0.5	SEMA5A, ICAM1, GATA3, SERPINE1, NFE2L2, TNFAIP3, GAS6, NDNF, IL11, SCG2, ANGPTL4	3.1	0.00034
GO:1902668	negative regulation of axon guidance	11	0.5	SEMA5A, WNT5A, SEMA6B, SEMA4F, SEMA7A, SEMA3E, SEMA4C, SEMA4B, SEMA3C, SEMA3A, SLIT2	3.1	0.00034
GO:0030031	cell projection assembly	75	3.2	KIF24, KIF27, PDGFA, FER, LPAR1, VCL, ACTR2, S1PR1, RAB23, CEP290, WDR35, ANO6, CCNO, RHOG, ICAM1, RAP2A, PLD1, HSP90AA1, CCDC88A, ROCK1, ACTN2, KIAA0586, SLIT2, FLNA, TBC1D22A, MAP4K4, CEP162, TACSTD2, MCIDAS, OPHN1, PMP22, EMP3, EMP1, CAV1, CEP120, C11ORF63, CEP126, ADAMTS16, TMEM216, ABLIM3, CEP164, C5ORF42, FXYD5, ZMYND8, CDC42EP2, EZR, CDC42EP1, RAC2, AGRN, EHD1, CDC42EP3, FGD6, APC, TBC1D2,…	1.4	0.00098
GO:0007423	sensory organ development	88	3.8	RHOJ, NOG, MYH15, AGTPBP1, MYO7A, EDN1, GJA1, ZEB1, SDC4, GLI3, TGFB1, TGFB2, ATP2B1, TSPAN12, SPRY2, OSR1, MCOLN3, GATA3, PAX8, FOXF2, CEP290, EGFR, RARG, LEF1, SIPA1L3, SIX2, NECTIN3, SIX4, INHBA, EYA4, MAN2A1, ACVR2B, CHRDL1, SERPINF1, LRP10, CLIC4, SIX1, FOXC1, MFAP2, PRDM1, SLITRK6, WNT5A, FGFR1, PPP2R3A, WNT5B, TDRD7, VIM, SOX9, NHS, EPHB2, NIPBL, MEIS2, ECE1, CCDC66, LPCAT1, FAT4, SOS1, CY…	1.4	0.001
GO:0002821	positive regulation of adaptive immune response	21	0.9	PVR, IL6, IL27RA, C3, IL6ST, ANXA1, HLA-A, ATAD5, HLA-B, CD40, HLA-E, NLRP3, TGFB1, MAP3K7, STAT6, CLCF1, HLX, GATA3, IL12A, TRAF6, NLRP10	2.1	0.00059
GO:0010639	negative regulation of organelle organization	59	2.5	DLC1, LIMA1, ZNF451, TTK, S1PR1, VPS13C, TRIM9, GSN, TMSB15B, MTBP, TPR, PID1, ARHGEF2, ESPL1, TMSB10, HMGA1, MYADM, SLIT2, EML2, PLEKHH2, TACSTD2, RGCC, FHOD3, TMSB4X, LRRK2, APC2, PML, HSPA1A, LIF, PATL2, WAPL, BUB1, FBXO43, KDM3A, BUB3, APC, BMP4, SMG6, JARID2, SWAP70, MSH2, LMNA, CENPF, ATAD2, SHANK1, MID1, ATM, ATRX, CORO1A, EPS8, DUSP1, GMFG, CAPG, TMOD3, DNMT1, SPTBN1, PHLDB2, FEZ2, SPTAN1	1.5	0.00093
GO:0098813	nuclear chromosome segregation	55	2.3	KIF23, XPO1, KIFC1, PRC1, TTK, RANGAP1, AURKB, ACTR2, MEI1, RAD21, INCENP, TPR, TOP2A, STAG1, KIF14, PAPD7, ESPL1, RB1, GEM, UBE2C, SGO2, SGO1, CLIP1, PDCD6IP, PAM, KIF4A, SLF2, AHCTF1, CEP55, WAPL, MAP10, NIPBL, CENPC, BUB1, PAFAH1B1, BUB3, APC, ERCC6L, CKAP5, DLGAP5, KIF18A, KIF18B, CENPF, SPDL1, PIBF1, CENPE, SMC2, CDC27, CENPI, ATM, SMC3, SMC4, ATRX, DUSP1, KNL1	1.5	0.00091
GO:0002440	production of molecular mediator of immune response	36	1.5	WNT5A, IL27RA, APLF, TLR2, PTPN22, HFE, TLR4, IL7R, TGFB1, IL31RA, TGFB2, MAP3K7, STAT6, CD96, IRAK3, CLCF1, GATA3, TRIM6, IL4R, SEMA7A, POU2F2, TRAF6, EXO1, IL6, BST2, MSH2, SWAP70, HLA-A, ATAD5, CD40, LIG4, HLA-E, NLRP3, GAS6, CD55, CAMK4	1.7	0.00079
GO:0071214	cellular response to abiotic stimulus	52	2.2	PTGS2, GJA1, TLR4, ANKRD1, AURKB, AQP1, TGFB1, MC1R, CASP8AP2, OSR1, BAG3, CASP8, YAP1, CRY1, ERRFI1, SLC12A6, EGFR, EGR1, PTPRK, ARHGEF2, PTGER4, DDB1, RELB, IFI16, CD40, HMGA2, ECT2, TANK, RAB11FIP5, GADD45A, SLC38A2, BLM, SOX9, ZFP36L1, NIPBL, MAP3K1, PTN, CNN2, RCSD1, TAF1, ITGA2, OXSR1, SNAI2, ATM, CYBA, PDE2A, NEDD4, MAPK14, IRF1, ENG, MYLK, OPN3	1.5	0.00093
GO:0051100	negative regulation of binding	31	1.3	BTAF1, PPARA, NOG, CAV1, RSF1, NFKBIA, HFE, AURKA, MITD1, AURKB, GTSE1, WAPL, DAB2, TAF1, NES, TMC8, SP100, ROCK1, LEF1, IFI16, HMGA2, ANXA2, SPAG9, IFIT2, IFIT1, DKK1, CSNK1E, ID1, CPNE1, LRRK2, CARM1	1.8	0.00077
GO:0007017	microtubule-based process	104	4.4	KIFC1, XPO1, PRC1, TUBB2B, TUBB2A, TTK, AURKA, AURKB, KIFC3, STARD9, ASPM, CEP85, STMN3, KIF5B, ROCK2, ESPL1, KIAA0753, MYH9, CEP152, BICD2, DCTN1, NAV1, CEP350, SGO1, MCIDAS, CATSPER1, CLIP1, PDCD6IP, DST, MAP7D3, CCDC8, DNAH11, KIF4A, C11ORF63, ULK4, PTK2, BLOC1S5, CCSER2, OBSL1, CKAP5, DNHD1, BRCA2, ARMC4, PIBF1, SPDL1, PLK4, PLK3, WDR62, GAS2L3, KIF23, KIF24, KIF27, FER, GTSE1, ARHGAP21, OFD1…	1.3	0.0011
GO:0048738	cardiac muscle tissue development	39	1.7	MEF2C, WNT5A, FGFR1, MEF2A, NOG, TBX20, EDN1, FHL2, GJA1, AKAP13, ANKRD1, ITGB1, TGFB1, TGFB2, S1PR1, OBSL1, HEG1, NRG1, SIK1, NKX2-5, BMP4, BMP2, ACTC1, TGFBR1, EFNB2, TGFBR2, LMNA, ACTN2, NEXN, PPP1R13L, NOTCH1, DKK1, XIRP2, MAPK14, FHOD3, MYH11, FOXC1, ENG, ACVR1	1.7	0.00087
GO:0070423	salivary gland morphogenesis	12	0.5	MAP3K7, IRAK2, NOD1, CASP8, ERBIN, NFKBIA, PTPN22, TLR4, HSPA1A, TRAF6, TNFAIP3, CHUK	2.9	0.00043
GO:0010165	mitotic cytokinesis	12	0.5	XRCC4, THBD, NIPBL, BLM, MSH2, ANXA1, BRCA2, LIG4, PMAIP1, HMGA2, ATM, IKBIP	2.9	0.00043
GO:0000281	nucleotide-binding oligomerization domain containing signaling pathway	12	0.5	EGFR, FGFR1, IL6, LAMA5, PDGFA, NTN4, TGM2, SEMA3C, SEMA3A, PLXND1, TGFB1, TGFB2	2.9	0.00043
GO:0007435	response to X-ray	12	0.5	STAMBP, KIF23, SNX9, KIF4A, KIF20B, SPTBN1, ANLN, MITD1, CEP55, SNX33, RASA1, APC	2.9	0.00043
GO:0022411	cellular component disassembly	87	3.7	CLSPN, LIMA1, KIF24, MMP9, SYNJ1, BCAN, MMP1, TGFB1, ACVR1C, SETX, TGFB2, CD44, VPS13C, RAE1, HTRA1, GSN, CASP8, DNAJC6, TPR, ADAM8, NRG1, TOP2A, KIF14, PRKCA, SATB1, ARHGEF2, STMN3, ROCK1, KIF5B, MICAL2, MMP19, FUNDC1, ACTN2, OPTN, CTSS, MMP14, LPIN1, HMGA1, DCTN1, DDIT4, MELTF, PLEKHH2, CFL2, CNEP1R1, LAMC2, CAV1, APC2, EXOC8, ATG14, MRPS10, HK2, TIMP2, TIMP1, SEMA5A, IRAK3, LAMB3, NUP214, PTK2…	1.4	0.0011
GO:0001935	endothelial cell proliferation	27	1.2	NRP2, WNT5A, CAV2, CAV1, GJA1, ITGB3, TNFSF12, CCL26, SEMA5A, CCL24, LOXL2, THBS1, SCG2, BMP4, PRKCA, BMP2, TGFBR1, RICTOR, MMP14, STAT1, ECM1, EPHA2, CYBA, VEGFC, F3, RGCC, ENG	1.9	0.00078
GO:0030900	forebrain development	66	2.8	NRP2, DLC1, MEF2C, NOG, AGTPBP1, BCAN, LPAR1, AQP1, GLI3, ROBO1, SEMA7A, AFDN, SEMA3A, MKL1, NRG1, PLCB1, ASPM, KIF14, EGFR, SATB2, PGAP1, BCL2A1, PCDH9, LEF1, CDK6, HMGA2, SLIT2, INHBA, HHEX, GNAQ, LRRK2, EXT1, SLITRK5, WNT5A, FGFR1, CEP120, SLC38A2, CDK5R2, EPHB2, SEMA5A, FAT4, NKX2-1, PTN, PAFAH1B1, LAMB1, DCLK1, BMP4, BMP2, GNAO1, AXL, NR4A2, DPYSL2, ANXA3, FOXP2, ATRX, FEZF1, ATP7A, NOTCH1, …	1.5	0.0011
GO:0035456	response to interferon-beta	10	0.4	PLSCR1, TMEM173, BST2, IFITM1, IFITM2, TRIM6, IFITM3, IRF1, XAF1, STAT1	3.3	0.00036
GO:0014910	regulation of smooth muscle cell migration	16	0.7	PDGFA, ITGA2, LPAR1, DOCK5, IQGAP1, SLIT2, DOCK4, LRP1, SERPINE1, ILK, HAS2, NFE2L2, PDGFD, IGFBP3, GSTP1, PLAU	2.4	0.00058
GO:0045665	negative regulation of neuron differentiation	40	1.7	WNT5A, VIM, ASAP1, LPAR1, SOX9, GLI3, EPHB2, SEMA5A, EDNRB, PTK2, SEMA7A, BCL11A, SEMA3E, INPP5F, IL15RA, SEMA3C, PAFAH1B1, SEMA3A, ASPM, NR2F1, DNM3, ARHGEF1, PTPRG, LGALS1, HMG20A, NLGN3, SLIT2, MIB1, MAP4K4, EPHA4, NOTCH1, SEMA6B, LRP1, ID1, SEMA4F, SEMA4C, SEMA4B, PMP22, CARM1, LRP4	1.6	0.00095
GO:0045773	negative regulation of epithelial cell apoptotic process	13	0.6	SEMA5A, CAST, ICAM1, GATA3, SERPINE1, NFE2L2, TNFAIP3, TCF7L2, GAS6, NDNF, IL11, SCG2, ANGPTL4	2.7	0.00049
GO:1904036	positive regulation of axon extension	13	0.6	SEMA5A, MACF1, TNFRSF12A, TRPV2, SEMA7A, ILK, MAP1B, L1CAM, PAFAH1B1, NRG1, CDH4, GOLGA4, FN1	2.7	0.00049
GO:0051492	regulation of stress fiber assembly	19	0.8	DLC1, ROCK1, PTGER4, ROCK2, TGFBR1, SMAD3, ALMS1, S100A10, LPAR1, SDC4, ARHGEF10, PPM1F, S1PR1, CTGF, TACSTD2, RGCC, PAK1, PHLDB2, SYNPO	2.2	0.00066
GO:1901653	cellular response to peptide	59	2.5	ADCY7, CPEB2, PPARG, EDN1, PTPN22, RANGAP1, FER, TGFB1, CASP4, NOD1, PIK3CA, OGT, PAK1, ERRFI1, CEACAM1, PID1, GPR173, ARHGEF2, IRS2, SOCS3, C2CD5, ACTN2, CDC5L, IRS1, LPIN1, GNB4, CA2, GSTP1, CAV2, CAV1, GNG11, PHIP, ZFP36L1, PTK2, SOS1, PCSK9, KLF5, IL6, PTPRE, KLF10, FBN1, PDK4, NR4A2, STAT1, NKX6-1, PTPN11, CYBA, RAB31, PRLR, SP1, FYN, ID1, UCP2, AKR1B1, IGFBP1, KLF2, HDAC9, ATP6V0A4, KLF4	1.5	0.0011
GO:0043112	receptor metabolic process	33	1.4	PPARA, CAV1, FUT8, REP15, EDN1, PPARG, CXCL8, ITGB2, ITGB3, ARFGEF2, ITGB1, TGFB1, ECE1, PICALM, EZR, NR1D1, SH3GLB1, ITGAV, DLG4, INPP5F, PCSK9, NRG1, CEACAM1, DNM3, OPTN, FURIN, ANXA2, RAB31, ADM, NEDD4, PLCG2, SMURF1, DNM1	1.7	0.00089
GO:0002526	acute inflammatory response	31	1.3	PTGS2, OSMR, C3, IL6ST, C5, PPARG, HFE, IL31RA, CFP, EDNRB, SAA1, GATA3, CFH, SERPINA1, ADAM8, ANO6, FN1, PIK3CG, ICAM1, IL6, CEBPB, CFB, C4BPB, NLRP3, PLSCR1, CD55, F3, CD59, PROS1, GSTP1, ACVR1	1.8	0.00087
GO:0035904	aorta development	15	0.6	LTBP1, EFNB2, TGFB2, ADAMTS6, NOTCH1, LRP1, PRICKLE1, SIX1, PRDM1, LOX, LRP2, PLXND1, LOXL1, ENG, MYLK	2.5	0.00057
GO:0045599	negative regulation of fat cell differentiation	14	0.6	WNT5A, IL6, ASXL1, SMAD3, RORA, ARNTL, BBS12, WWTR1, TRIB2, TGFB1, SOD2, ZFP36L2, GATA3, SORT1	2.6	0.00054
GO:1901201	regulation of extracellular matrix assembly	7	0.3	COL17A1, LAMB3, ITGA6, ITGB4, LAMC2, DST, PLEC	4.6	0.00022
GO:0031581	hemidesmosome assembly	7	0.3	NOTCH1, RGCC, SMAD3, ANTXR1, SOX9, PHLDB2, TGFB1	4.6	0.00022
GO:0045786	negative regulation of cell cycle	82	3.5	CLSPN, PTGS2, E2F7, TTK, AURKA, AURKB, HMGN5, TGFB1, LATS2, GTSE1, KANK2, TGFB2, BRINP2, GATA3, CDKN2D, ILK, MTBP, TPR, TOP2A, EGFR, PTPRK, ESPL1, CDK6, GPR132, RB1, CDC5L, UBE2C, HMGA2, HHEX, INHBA, NABP1, UHRF2, RFWD3, RGCC, IL12A, FOXC1, TNFAIP3, PRNP, CARM1, GADD45A, PPP1R15A, BLM, TICRR, FHL1, PML, CXCL8, ZNF655, SFN, TIMP2, TCF7L2, LIF, ZFP36L1, WAPL, ZFP36L2, HEXIM1, FBXO43, BUB1, SKIL, TH…	1.4	0.0013
GO:0060445	pericardium development	9	0.4	WNT5A, FLRT3, NOTCH1, BMP2, SOS1, TBX20, SMAD3, HEG1, SETD2	3.6	0.00036
GO:0060039	branching involved in salivary gland morphogenesis	9	0.4	PTHLH, ADAMTS7, BMP4, RARG, TGFBR1, EFEMP1, ADAMTS12, SNAI2, SOX9	3.6	0.00036
GO:0032331	negative regulation of antigen receptor-mediated signaling pathway	9	0.4	PLCL2, LPXN, EZR, LGALS3, PTPN22, PAWR, PRNP, CEACAM1, GBP1	3.6	0.00036
GO:0050858	negative regulation of chondrocyte differentiation	9	0.4	FGFR1, IL6, LAMA5, PDGFA, NTN4, TGM2, SEMA3C, SEMA3A, PLXND1	3.6	0.00036
GO:0002687	positive regulation of leukocyte migration	26	1.1	WNT5A, CXCL1, CXCL3, CSF1, CXCL2, GPSM3, CXCL8, TGFB1, CCL24, RAC2, SERPINE1, PDGFD, THBS1, ADAM8, ANO6, ICAM1, IL6, LGALS3, SWAP70, NCKAP1L, ITGA2, GAS6, VEGFC, IL12A, ADAM17, CAMK1D	1.9	0.00087
GO:0002824	positive regulation of adaptive immune response based on somatic recombination of immune receptors built from immunoglobulin superfamily domains	20	0.9	PVR, IL6, IL27RA, C3, ANXA1, HLA-A, ATAD5, HLA-B, CD40, HLA-E, NLRP3, TGFB1, MAP3K7, STAT6, CLCF1, HLX, GATA3, IL12A, TRAF6, NLRP10	2.1	0.00076
GO:1901655	cellular response to ketone	20	0.9	EGFR, IL6, PTGER4, ROCK2, GNAI1, PPARG, CDC5L, PRKCE, AQP1, GAS6, TGFB1, DDIT4, ATP2B1, SERPINF1, AKR1B1, FBXO32, MSN, KLF2, ERRFI1, KLF4	2.1	0.00076
GO:0045064	T-helper 2 cell differentiation	8	0.3	IL6, IL4R, IL18, HLX, GATA3, ANXA1, BCL3, NLRP3	4	0.00032
GO:0022408	negative regulation of cell-cell adhesion	30	1.3	PPARA, HFE, PTPN22, PAWR, SDC4, GLI3, CCL28, TGFB1, PTK2, SERPINE2, UBASH3B, HLX, IL4R, CEACAM1, BMP4, PELI1, CEBPB, LGALS3, SWAP70, PODXL, ANXA1, LEF1, MYADM, PDCD1LG2, CD274, PDE5A, RGCC, IRF1, PRNP, KLF4	1.8	0.00098
GO:0003401	axis elongation	11	0.5	WNT5A, BMP4, SPRY2, SPRY1, TNC, MED12, YAP1, AREG, FGF1, SOX9, TGFB1	3	0.00049
GO:0030178	negative regulation of Wnt signaling pathway	41	1.8	WNT5A, HECW1, CAV1, NOG, WNT5B, PPP2R3A, APC2, IGFBP6, BICC1, SOX9, TCF7L2, GLI3, LATS2, HIC1, DAB2, HMGXB4, NKX2-5, APC, EGR1, BMP2, TRABD2A, MED12, LEF1, WWTR1, SNAI2, HMGA2, STK4, PSMB8, PSMB9, DKK3, NOTCH1, RGS20, DKK1, LRP1, PRICKLE1, CSNK1E, MAPK14, MCC, IGFBP1, LRP4, IGFBP4	1.6	0.0011
GO:0045639	positive regulation of myeloid cell differentiation	21	0.9	PRKCA, CSF3, HCLS1, CSF1, KLF10, NCKAP1L, LEF1, RB1, ZFP36L1, LIF, INHBA, SMAP1, ISG15, ETS1, RIPK1, MAPK14, CASP8, OGT, CA2, TRAF6, RUNX1	2.1	0.00085
GO:0006887	exocytosis	72	3.1	SYT1, TLN1, FAM3C, PDGFA, F13A1, SYNJ1, FER, SDC4, TGFB1, VCL, TGFB2, ANK1, BRPF3, GAB2, TRIM9, IL4R, SERPINE1, SNPH, RABGEF1, SERPINA1, RAPGEF4, PAK1, CEACAM1, PIK3CG, STX1A, ACTN4, STX2, RPH3AL, ACTN1, ACTN2, PCDH7, FLNA, VEGFC, RAB11FIP5, UNC13D, TMSB4X, PDCD6IP, LRRK2, TNFAIP2, PROS1, EXOC6B, CDK5R2, ADORA2B, EXOC8, ITGB3, RIMS2, ARFGEF2, TIMP1, LGALS3BP, RAC2, THBS1, STX11, IL1RAPL1, QSOX1, …	1.4	0.0014
GO:0003151	outflow tract morphogenesis	19	0.8	WNT5A, BMP4, MEF2C, NOG, TBX20, TGFBR2, FZD2, TGFB2, NIPBL, NEDD4, SIX1, ILK, SEMA3C, FOXC1, PLXND1, NKX2-5, ENG, ACVR1, PARVA	2.2	0.00081
GO:1901654	response to ketone	36	1.5	CAV1, GNAI1, IGFBP7, EDN1, PPARG, TLR2, AQP1, TGFB1, TGFB2, ATP2B1, PTN, MSN, THBS1, FOSL1, ERRFI1, EGFR, IL6, PTGER4, ROCK2, FOSB, CDC5L, PRKCE, SLIT2, GAS6, DDIT4, GJB2, CYBA, CA9, DUSP1, SERPINF1, CATSPER1, AKR1B1, TBXA2R, FBXO32, KLF2, KLF4	1.7	0.0011
GO:0060425	lung morphogenesis	16	0.7	BMP4, NOG, TNC, TGFBR2, CELSR1, HMGA2, SOX9, FOXP2, LIF, SPRY2, HHEX, SPRY1, ID1, PLOD3, NKX2-1, YAP1	2.4	0.00072
GO:0001841	neural tube formation	25	1.1	BMP4, WNT5A, DLC1, NOG, RARG, MED12, LUZP1, TEAD2, FZD2, CELSR1, SDC4, STK4, MTHFD1L, VASP, TGFB1, TGFB2, MIB1, ADM, PRICKLE1, SEMA4C, KIF20B, APAF1, TRAF6, SETD2, IPMK	1.9	0.00096
GO:0002699	positive regulation of immune effector process	35	1.5	PVR, WNT5A, ZC3HAV1, ADORA2B, C3, IL18, PTPN22, TLR4, FER, TGFB1, MAP3K7, STAT6, SHB, RAC2, GAB2, CLCF1, TRIM6, DDX60, HLX, IL4R, SEMA7A, GATA3, RABGEF1, TRAF6, DHX58, IL6, ANXA1, HLA-A, ATAD5, HLA-B, CD40, HLA-E, NLRP3, UNC13D, IL12A	1.7	0.0011
GO:0035872	nucleotide-binding domain, leucine rich repeat containing receptor signaling pathway	12	0.5	MAP3K7, IRAK2, NOD1, CASP8, ERBIN, NFKBIA, PTPN22, TLR4, HSPA1A, TRAF6, TNFAIP3, CHUK	2.8	0.00059
GO:0090077	foam cell differentiation	12	0.5	CSF2, PPARA, ITGAV, IL18, CSF1, PPARG, NFKBIA, ABCA1, ITGB3, STAT1, TGFB1, ABCA5	2.8	0.00059
GO:0010742	macrophage derived foam cell differentiation	12	0.5	CSF2, PPARA, ITGAV, IL18, CSF1, PPARG, NFKBIA, ABCA1, ITGB3, STAT1, TGFB1, ABCA5	2.8	0.00059
GO:0031960	response to corticosteroid	34	1.5	CREBRF, PAM, PTGS2, IGFBP7, EDN1, NR3C1, AQP1, TGFB1, ATP2B1, ZFP36L1, AKR1C3, ZFP36L2, HNMT, CTGF, FOSL1, ERRFI1, EGFR, ZFP36, IL6, ANXA1, FOSB, SLIT2, ANXA3, DDIT4, CYBA, NOTCH1, SERPINF1, DUSP1, ADM, FBXO32, STC1, AREG, ENG, GSTP1	1.7	0.0011
GO:0050688	regulation of defense response to virus	22	0.9	MICB, AP1M1, ZC3HAV1, PML, HLA-A, HERC5, PTPN22, IL15, BIRC3, SEC14L1, DDX58, DOCK2, IFIT1, TMEM173, AP1S2, HTRA1, FYN, MB21D1, TRIM6, DDX60, TNFAIP3, DHX58	2	0.00093
GO:0002294	CD4-positive, alpha-beta T cell differentiation involved in immune response	15	0.6	IL6, PTGER4, IL18, RELB, ANXA1, LEF1, RORA, NLRP3, ATP7A, STAT6, SHB, IL4R, GATA3, HLX, BCL3	2.4	0.00072
GO:0016202	regulation of striated muscle tissue development	27	1.2	MEF2C, FGFR1, NOG, TBX20, EDN1, GJA1, TGFB1, CYP26B1, SOX15, NRG1, NKX2-5, BMP4, BMP2, TGFBR1, TGFBR2, EFNB2, SMAD3, LEF1, CENPF, ARNTL, SIX4, SHOX2, NOTCH1, DKK1, MAPK14, SIX1, HDAC9	1.8	0.001
GO:0090184	positive regulation of kidney development	13	0.6	BMP4, EGR1, NOG, PDGFA, SIX4, BASP1, SOX9, TGFB1, LIF, GATA3, PAX8, SIX1, PDGFD	2.6	0.00066
GO:0072171	vasoconstriction	18	0.8	BMP4, BMP2, NOG, ADAMTS16, SIX4, SOX9, GLI3, TGFB1, FMN1, OSR1, FAT4, TACSTD2, LAMA5, GATA3, PAX8, SIX1, ILK, FGF1	2.2	0.00085
GO:0042310	mesonephric tubule morphogenesis	18	0.8	EGFR, ICAM1, CAV1, PTGS2, EDN1, RAP1GDS1, GJA1, DOCK5, DOCK4, EDNRA, EDNRB, HRH1, ADM, HTR7, ARHGAP42, ADRA1B, TBXA2R, HTR1D	2.2	0.00085
GO:0030010	establishment of cell polarity	23	1	WNT5A, RAP2A, SDCCAG8, PARD3, ARHGEF2, MAP1B, FERMT1, SIPA1L3, SPDL1, RICTOR, BRSK1, MYH9, AMOTL1, SPRY2, SPRY1, DOCK2, PTK2, EZR, GSN, FRMD4A, CYP26B1, PAFAH1B1, MSN	2	0.001
GO:0009100	glycoprotein metabolic process	71	3	CSPG4, BCAN, IL15, PAWR, DSE, DPY19L1, CFP, ST6GALNAC5, ST3GAL2, SLC35D1, ST3GAL5, HPSE, B3GALNT1, ST3GAL6, CHST11, PUM3, CHST15, OGT, PLCB1, TNIP1, LIG1, CHST3, CHST4, MOGS, MAN1A1, GLCE, NDNF, ST6GALNAC2, ADAMTS7, MAN2A1, ADAMTS9, NPC1, CHST7, CHSY3, EXT1, HS3ST3B1, MGAT5B, GCNT2, FUT8, SPOCK3, GALNT6, GALNT5, TIPARP, OAS2, TCF7L2, B3GNT9, B3GNT5, EOGT, HS6ST3, B3GLCT, GALNT16, FUT4, B3GNT3, B3…	1.4	0.0015
GO:0007267	cell-cell signaling	228	9.7	MEF2C, SYT1, LYPD1, NOG, PTGS2, LTBP4, EDN1, AMOTL1, AMOTL2, NOV, MAP3K7, BDNF, SERPINE2, CTGF, ILK, AFDN, RAPGEF4, HTR1D, CRY1, SLC12A6, RARG, KIF5B, TRABD2A, EFNB2, MED12, HTR7, NPTN, FCHSD2, FCHSD1, TGFB1I1, PMP22, PPP2R3A, GNAI2, GNAI1, CACNB1, HFE, CACNB4, RIMS2, EPHB2, SEMA5A, LIF, SLC29A1, MACF1, AGRN, STX11, GAD1, NKX2-5, BMP4, BMP2, KLF10, SMAD3, CELSR1, NKX6-1, PTPN11, LAMA2, NOTCH1, CN…	1.2	0.0019
GO:0048562	embryonic organ morphogenesis	54	2.3	MEF2C, NOG, MYO7A, EDN1, TBX20, GJA1, ZEB1, GLI3, MTHFD1L, SPRY2, OSR1, HLX, GATA3, PAX8, CHST11, FOXF2, CEP290, YAP1, SATB2, RARG, MICAL2, MED12, SIX2, SIX4, MMP14, MIB1, HOXD3, SIX1, HOXD4, MFAP2, SLITRK6, ACVR1, WNT5A, FGFR1, SOX9, EPHB2, NIPBL, NKX2-5, RUNX2, BMP4, TGFBR1, FBN1, EFEMP1, TGFBR2, SMAD3, TEAD2, CELSR1, FZD2, EPHA2, HOXB3, SHOX2, NOTCH1, SETD2, ENG	1.5	0.0014
GO:0030206	regulation of anoikis	10	0.4	CAV1, PTK2, NOTCH1, MCL1, ITGA5, PDK4, PIK3CA, SIK1, SNAI2, ITGB1	3.2	0.00053
GO:0071470	cellular response to osmotic stress	10	0.4	CHST7, SLC35D1, CHSY3, CSGALNACT2, CHST11, CSPG4, BCAN, CHST3, CHST15, DSE	3.2	0.00053
GO:0043536	positive regulation of blood vessel endothelial cell migration	10	0.4	PRKCA, VEGFC, SRPX2, PTGS2, MAPK14, NFE2L2, AMOTL1, THBS1, HDAC9, TGFB1	3.2	0.00053
GO:2000209	chondroitin sulfate biosynthetic process	10	0.4	ZFP36L1, SLC12A6, ARHGEF2, OSR1, RELB, OXSR1, AQP1, ERRFI1, MYLK, RCSD1	3.2	0.00053
GO:0022898	regulation of transmembrane transporter activity	39	1.7	MEF2C, CAV1, FHL1, MMP9, CACNB1, CACNB4, FXYD5, GSTM2, OSR1, STAC, ANK2, WNK4, PDE4B, DLG4, PCSK9, ASPH, AHNAK, GLRX, CACNA2D1, ACTN4, KIF5B, NLGN2, NLGN3, ACTN2, PDE4D, OXSR1, CTSS, PRKCE, SHANK1, STOM, RASGRF1, NEDD4, CNIH3, RIPK1, PLCG2, GNB5, TCAF2, TCAF1, CRACR2A	1.6	0.0013
GO:0071772	response to BMP	32	1.4	WNT5A, NOG, CAV1, FSTL3, HFE, FSTL1, RGMB, HTRA1, GATA3, ILK, HTRA3, ADAMTS12, SKIL, NKX2-5, RUNX2, CYR61, EGR1, BMP4, BMP2, FBN1, LEF1, ADAMTS7, NOTCH1, ACVR2B, CHRDL1, DKK1, ID1, SMURF2, SMURF1, ENG, LRP4, ACVR1	1.7	0.0013
GO:0071773	cellular response to BMP stimulus	32	1.4	WNT5A, NOG, CAV1, FSTL3, HFE, FSTL1, RGMB, HTRA1, GATA3, ILK, HTRA3, ADAMTS12, SKIL, NKX2-5, RUNX2, CYR61, EGR1, BMP4, BMP2, FBN1, LEF1, ADAMTS7, NOTCH1, ACVR2B, CHRDL1, DKK1, ID1, SMURF2, SMURF1, ENG, LRP4, ACVR1	1.7	0.0013
GO:0070424	regulation of nucleotide-binding oligomerization domain containing signaling pathway	6	0.3	ERBIN, PTPN22, TLR4, HSPA1A, BIRC3, TNFAIP3	5.3	0.00024
GO:0071346	cellular response to interferon-gamma	30	1.3	WNT5A, NMI, EDN1, PPARG, PML, OAS3, IFI30, OAS1, OAS2, CCL26, CCL24, NLRC5, CD44, TRIM8, ICAM1, GBP5, SP100, HLA-A, HLA-B, MID1, STAT1, HLA-E, IRF9, OASL, CD58, MT2A, IRF1, JAK1, GBP2, GBP1	1.8	0.0013
GO:0009617	response to bacterium	92	3.9	MEF2C, IL27RA, PTGS2, IL18, EDN1, TLR2, PTPN22, TLR4, ANKRD1, FER, TLR6, NOCT, TGFB1, CFP, CD96, EDNRB, TNFRSF11B, NOD1, ISG15, TRIM6, PDE4B, CASP8, SERPINE1, LOXL1, AKIRIN2, CHUK, COCH, ZFP36, IRAK2, PRKCA, ICAM1, PTGER4, LY96, PRG2, HLA-A, PDE4D, HLA-B, OPTN, CD40, NLRP3, HLA-E, PRKCE, JUNB, NLRP1, THBD, ADM, TNFRSF10D, IL12A, ADAM17, PRDM1, TNFAIP3, SSC5D, GSTP1, CSF3, WNT5A, CXCL1, TNFRSF6B, …	1.3	0.0018
GO:0009101	glycoprotein biosynthetic process	64	2.7	CSPG4, BCAN, IL15, PAWR, DPY19L1, DSE, ST6GALNAC5, CFP, ST3GAL2, SLC35D1, ST3GAL5, B3GALNT1, ST3GAL6, CHST11, PUM3, CHST15, OGT, PLCB1, TNIP1, LIG1, CHST3, CHST4, MOGS, MAN1A1, GLCE, ST6GALNAC2, ADAMTS7, MAN2A1, NPC1, CHST7, CHSY3, EXT1, HS3ST3B1, MGAT5B, GCNT2, FUT8, GALNT6, GALNT5, TIPARP, OAS2, TCF7L2, B3GNT9, B3GNT5, EOGT, B3GLCT, HS6ST3, GALNT16, FUT4, B3GNT3, B3GNT2, B4GALT6, THBS1, GALNT13…	1.4	0.0017
GO:0030224	monocyte differentiation	11	0.5	ZFP36L1, MEF2C, BMP4, CSF2, PDE2A, CSF1, PPARG, CDK6, IFI16, MYH9, IL31RA	2.9	0.00068
GO:0033280	response to vitamin D	11	0.5	ATP2B1, PTGS2, TNC, CDKN2D, PIM1, PTN, STC1, IL15, SNAI2, TGFB1, KANK2	2.9	0.00068
GO:0032465	regulation of cytokinesis	18	0.8	KIF23, KIF14, E2F7, PKN2, BRCA2, AURKA, AURKB, PRKCE, ECT2, CSPP1, MAP10, PLK3, SH3GLB1, SVIL, KIF20B, CENPV, CIT, PRPF40A	2.2	0.001
GO:0002287	alpha-beta T cell activation involved in immune response	15	0.6	TGFBR2, ANXA1, TLR4, PRKCE, THBD, HPSE, F3, SERPINE1, TBXA2R, HBEGF, SOX15, NFE2L2, THBS1, ANO6, MYLK	2.4	0.00091
GO:0050819	negative regulation of coagulation	15	0.6	IL6, PTGER4, IL18, RELB, ANXA1, LEF1, RORA, NLRP3, ATP7A, STAT6, SHB, IL4R, GATA3, HLX, BCL3	2.4	0.00091
GO:0002293	regulation of interleukin-1 beta production	15	0.6	WNT5A, EGR1, CARD8, SPHK1, GSDMD, PML, SMAD3, IFI16, NLRP3, NLRP1, S1PR3, NOD1, TNFAIP3, ERRFI1, GSTP1	2.4	0.00091
GO:0032651	alpha-beta T cell differentiation involved in immune response	15	0.6	PLAT, PDGFA, EDN1, ANXA5, ANXA2, PLAUR, THBD, PROCR, SERPINE2, UBASH3B, SERPINE1, THBS1, PROS1, PLAU, CEACAM1	2.4	0.00091
GO:0090303	positive regulation of wound healing	15	0.6	IL6, PTGER4, IL18, RELB, ANXA1, LEF1, RORA, NLRP3, ATP7A, STAT6, SHB, IL4R, GATA3, HLX, BCL3	2.4	0.00091
GO:0032412	regulation of ion transmembrane transporter activity	38	1.6	MEF2C, CAV1, FHL1, MMP9, CACNB1, CACNB4, FXYD5, GSTM2, OSR1, STAC, ANK2, WNK4, PDE4B, DLG4, PCSK9, ASPH, AHNAK, GLRX, CACNA2D1, ACTN4, KIF5B, NLGN2, NLGN3, ACTN2, PDE4D, OXSR1, CTSS, PRKCE, SHANK1, STOM, RASGRF1, NEDD4, CNIH3, PLCG2, GNB5, TCAF2, TCAF1, CRACR2A	1.6	0.0015
GO:0001936	regulation of endothelial cell proliferation	24	1	NRP2, PRKCA, WNT5A, BMP4, CAV2, BMP2, CAV1, TGFBR1, GJA1, RICTOR, TNFSF12, ITGB3, STAT1, ECM1, CCL26, CCL24, SEMA5A, VEGFC, CYBA, F3, RGCC, THBS1, ENG, SCG2	1.9	0.0012
GO:0060627	regulation of vesicle-mediated transport	78	3.3	SYT1, PPARG, SYNJ1, FER, SDC4, TGFB1, DAB2, SMAP1, PICALM, GAB2, TBC1D12, TRIM9, IL4R, SERPINE1, DLG4, RABGEF1, DNAJC6, RAPGEF4, MSN, ANO6, CEACAM1, STX1A, ACTN4, KIF5B, C2CD5, RPH3AL, ACTN2, MFGE8, TBC1D22A, MIB1, UNC13D, OPHN1, PDCD6IP, LRRK2, ANKFY1, TBC1D8B, CAMK1D, WNT5A, CAV1, SNAP91, CDK5R2, ADORA2B, C3, HFE, RIMS2, DOCK2, EZR, RAC2, ITGAV, INPP5F, PCSK9, CNN2, PTX3, EHD1, IL1RAPL1, EHD2, …	1.4	0.0019
GO:0035107	limb morphogenesis	32	1.4	WNT5A, FRAS1, FGFR1, NOG, PLXNA2, CRABP2, GJA1, C5ORF42, SOX9, GLI3, TGFB2, ECE1, NIPBL, OSR1, CYP26B1, CHST11, SEMA3C, RUNX2, PCSK5, BMP4, RARG, MYH3, LEF1, MBNL1, FMN1, ATRX, SHOX2, NOTCH1, DKK1, GNAQ, LNPK, LRP4	1.7	0.0014
GO:0035108	appendage morphogenesis	32	1.4	WNT5A, FRAS1, FGFR1, NOG, PLXNA2, CRABP2, GJA1, C5ORF42, SOX9, GLI3, TGFB2, ECE1, NIPBL, OSR1, CYP26B1, CHST11, SEMA3C, RUNX2, PCSK5, BMP4, RARG, MYH3, LEF1, MBNL1, FMN1, ATRX, SHOX2, NOTCH1, DKK1, GNAQ, LNPK, LRP4	1.7	0.0014
GO:0030330	DNA damage response, signal transduction by p53 class mediator	25	1.1	MUC1, SP100, E2F7, PML, BRCA2, AURKA, ANKRD1, PMAIP1, SFN, SNAI2, CENPJ, GTSE1, ATM, HIC1, ATRX, PLK3, CD44, RGCC, SPRED2, BCL3, NDRG1, SPRED1, CARM1, PLA2R1, GADD45A	1.9	0.0013
GO:0006024	glycosaminoglycan biosynthetic process	26	1.1	GCNT2, GALNT5, CSPG4, BCAN, SDC4, DSE, TGFB1, ST3GAL2, SLC35D1, CHST11, ST3GAL6, B3GNT3, B3GNT2, CHST15, AGRN, B4GALT6, B4GALT5, CHST2, CHST3, GLCE, CHST7, CHSY3, CSGALNACT2, HAS2, EXT1, HS3ST3B1	1.8	0.0013
GO:0003206	cardiac chamber morphogenesis	27	1.2	MEF2C, WNT5A, NOG, TBX20, FHL2, TGFB1, TGFB2, SOS1, GATA3, HEG1, SEMA3C, NRG1, NKX2-5, CYR61, BMP4, TGFBR1, TGFBR2, FZD2, PPP1R13L, SHOX2, NOTCH2, NOTCH1, FOXC1, ENG, RBM15, PARVA, ACVR1	1.8	0.0014
GO:0007052	mitotic spindle organization	13	0.6	BMP4, NOG, BMP2, TGFBR1, TGFBR2, TBX20, SOX9, SNAI2, TGFB2, NOTCH1, NEDD4, ENG, ACVR1	2.6	0.00086
GO:0003197	endocardial cushion development	13	0.6	KIF23, KIF4A, MAP10, KIF11, PRC1, CEP126, WDR62, SUN2, TTK, AURKA, AURKB, DYNC1H1, SMC3	2.6	0.00086
GO:0002758	innate immune response-activating signal transduction	47	2	CAV1, IFIH1, ZC3HAV1, BTRC, TLR2, NFKBIA, PTPN22, TLR4, HSPA1A, ITGB2, TLR6, SEC14L1, MAP3K7, IRAK3, NOD1, NR1D1, MAP3K1, DDX60, CASP8, PAK1, TRAF6, ADAM8, TNIP1, DHX58, CHUK, IRAK2, PELI1, LY96, ICAM2, RELB, ERBIN, CTSS, PRKCE, RFTN1, BIRC3, TANK, PSMB8, PSMB9, DDX58, CYBA, CARD11, FYN, RIPK1, PLCG2, IRF1, TNFAIP3, DMBT1	1.5	0.0017
GO:0006470	protein dephosphorylation	49	2.1	DLC1, PDP1, CTTNBP2NL, NUAK1, BTRC, PTPN22, PTPN21, TGFB1, DNAJC6, MASTL, PTPRK, SYMPK, ROCK1, ROCK2, PTPRG, MYH3, PTPRH, PPM1F, EYA4, TNS2, CNEP1R1, PPP1R15A, PPP2R3A, SLC39A10, PPP3R1, DUSP11, DUSP18, PPP1R3C, UBASH3B, PPP1R12A, MTMR6, PTPN7, PTPRB, PTPRE, NCEH1, SWAP70, DLGAP5, YWHAB, PTPN14, ITGA1, NCKAP1L, PTPN12, PTPN11, DUSP5, DUSP4, DUSP1, UBLCP1, DUSP7, DUSP6	1.5	0.0017
GO:0043407	regulation of cell junction assembly	19	0.8	DLC1, CAV1, ROCK1, ROCK2, S100A10, GJA1, SMAD3, MMP14, SDC4, SNAI2, IQGAP1, PPM1F, FMN1, CORO1C, PTK2, SLK, MACF1, THBS1, PHLDB2	2.1	0.0012
GO:1901888	negative regulation of MAP kinase activity	19	0.8	BMP4, CAV1, STK38, PTPN22, SPRY4, GPS2, DUSP5, SPRY2, DUSP18, IRAK3, DUSP4, SPRY1, DUSP1, RGS4, SPRED2, SPRED1, DUSP7, GSTP1, DUSP6	2.1	0.0012
GO:0001656	metanephros development	22	0.9	EGR1, BMP4, FRAS1, PDGFA, FBN1, SIX2, SIX4, BASP1, SOX9, STAT1, WWTR1, GLI3, FMN1, LIF, SPRY1, NIPBL, OSR1, FAT4, GATA3, PAX8, SIX1, YAP1	2	0.0013
GO:0021915	neural tube development	34	1.5	DLC1, WNT5A, NOG, PLXNA2, LUZP1, FAM212A, SDC4, GLI3, MTHFD1L, TGFB1, TGFB2, ZFP36L1, PLOD3, SEMA3C, TRAF6, IPMK, BMP4, RARG, MED12, TEAD2, CELSR1, FZD2, GORAB, STK4, VASP, EPHA2, MIB1, NOTCH1, ADM, PRICKLE1, SEMA4C, KIF20B, APAF1, SETD2	1.7	0.0016
GO:0070432	regulation of entry of bacterium into host cell	5	0.2	PPARA, NR1D1, ITGAV, PPARG, ITGB3	6.6	0.00017
GO:2000535	regulation of nucleotide-binding oligomerization domain containing 2 signaling pathway	5	0.2	CAV1, ITGAV, CXCL8, FUCA2, EXOC2	6.6	0.00017
GO:0010871	common-partner SMAD protein phosphorylation	5	0.2	ERBIN, PTPN22, TLR4, HSPA1A, TNFAIP3	6.6	0.00017
GO:0007182	negative regulation of receptor biosynthetic process	5	0.2	BMP4, TGFBR2, PML, SPTBN1, TGFB1	6.6	0.00017
GO:0010952	positive regulation of peptidase activity	33	1.4	DLC1, CAV1, PPARG, TNFSF15, PML, PMAIP1, ACVR1C, PICALM, NOD1, CASP8AP2, GSN, CTGF, ROBO1, CASP8, DAP, ASPH, AKIRIN2, FN1, CYR61, CARD8, SMAD3, IFI16, MMP14, NLRP3, NLRP1, TANK, PCOLCE2, PPM1F, IFI27, F3, RIPK1, APAF1, ANTXR1	1.7	0.0016
GO:0043517	positive regulation of DNA damage response, signal transduction by p53 class mediator	7	0.3	LIF, PRKCA, HCLS1, CSF1, RIPK1, CASP8, RB1	4.3	0.00043
GO:0010745	negative regulation of macrophage derived foam cell differentiation	7	0.3	SPRED2, ANKRD1, SPRED1, PMAIP1, PLA2R1, ATM, HIC1	4.3	0.00043
GO:0045651	positive regulation of macrophage differentiation	7	0.3	PPARA, ITGAV, PPARG, NFKBIA, ABCA1, ITGB3, ABCA5	4.3	0.00043
GO:1903039	positive regulation of leukocyte cell-cell adhesion	43	1.8	CAV1, IL6ST, IL18, PTPN22, IL15, IL7R, GLI3, TGFB1, MAP3K7, HSPH1, SHB, CD44, GATA3, IL4R, HLX, PIK3CA, PAK1, TRAF6, ADAM8, EBI3, AP3B1, IL6, LGALS1, TGFBR2, EFNB2, ANXA1, HLA-A, NCKAP1L, RICTOR, HLA-E, NLRP3, PDCD1LG2, PTPN11, CD83, CARD11, CD55, CORO1A, FYN, ETS1, CD59, CD274, IL12A, HAS2	1.6	0.0018
GO:0071453	cellular response to oxygen levels	32	1.4	BACH1, CAV1, CPEB2, PTGS2, HP1BP3, EDN1, PPARG, ANKRD1, PMAIP1, LPAR1, RORA, AQP1, POLR2A, ZFP36L1, SLC29A1, ERO1A, PTN, NDRG1, ADAM8, EGR1, ICAM1, EPAS1, CBL, LMNA, PRKCE, NDNF, NOTCH1, PLK3, CA9, RGCC, STC1, NFE2L2	1.7	0.0016
GO:0007098	centrosome cycle	20	0.9	CEP85, XPO1, CEP120, KIF11, ROCK2, CKAP5, CEP135, BRCA2, AURKA, BRSK1, KIAA0753, CEP152, CENPJ, TUBGCP2, ARHGEF10, OFD1, PLK4, WDR62, PDCD6IP, GADD45A	2	0.0013
GO:0008543	fibroblast growth factor receptor signaling pathway	24	1	WNT5A, FLRT3, RBFOX2, FGF5, FGFR1, FLRT2, NOG, CBL, IQGAP1, SETX, POLR2A, PTPN11, SPRY2, SPRY1, FAT4, CTGF, GATA3, NPTN, SPRED2, ANOS1, SPRED1, THBS1, FGF1, SHCBP1	1.9	0.0014
GO:0033047	positive regulation of response to wounding	16	0.7	TGFBR2, ANXA1, TLR4, PRKCE, SCARF1, THBD, HPSE, F3, SERPINE1, TBXA2R, HBEGF, SOX15, NFE2L2, THBS1, ANO6, MYLK	2.3	0.0011
GO:1903036	regulation of B cell proliferation	16	0.7	SLF2, DLGAP5, CENPF, TTK, CENPE, ESPL1, RB1, UBE2C, CDC27, ATM, ATRX, DUSP1, BUB1, TPR, BUB3, APC	2.3	0.0011
GO:0030888	regulation of mitotic sister chromatid segregation	16	0.7	MEF2C, IRS2, PELI1, SLC39A10, BST1, NCKAP1L, ATAD5, TLR4, CD40, PAWR, ATM, AHR, CARD11, CLCF1, PRDM1, NFATC2	2.3	0.0011
GO:0006913	nucleocytoplasmic transport	80	3.4	XPO1, PTGS2, XPO5, IL18, XPO4, TLR2, PTPN22, TLR4, RANGAP1, GLI3, TGFB1, GTSE1, TGFB2, NOV, AKR1C3, TMEM173, DAB2, RAE1, MDFIC, RAB23, DDX20, TPR, EGFR, EGR2, SP100, HSP90AA1, ANP32E, SIX2, NLRP3, ECT2, PKIA, FLNA, HHEX, GNAQ, IPO7, KPNA7, KPNA4, KPNA3, CSF3, APC2, NFKBIE, PPP3R1, PML, AKAP13, NFKBIA, SFN, TCF7L2, SEMA5A, NUP214, NUP50, BCL3, GEMIN5, BMP4, NUP153, IL6, SMG6, HCLS1, TGFBR1, SPHK1,…	1.4	0.0022
GO:0002700	regulation of production of molecular mediator of immune response	25	1.1	WNT5A, APLF, IL27RA, PTPN22, HFE, TLR4, TGFB1, TGFB2, MAP3K7, STAT6, IRAK3, CD96, CLCF1, IL4R, SEMA7A, GATA3, TRIM6, TRAF6, IL6, BST2, HLA-A, ATAD5, CD40, NLRP3, HLA-E	1.9	0.0015
GO:0033045	regulation of sister chromatid segregation	18	0.8	SLF2, DLGAP5, CENPF, TTK, CENPE, ESPL1, RB1, UBE2C, CDC27, ATM, ATRX, WAPL, RAD21, DUSP1, BUB1, TPR, BUB3, APC	2.1	0.0012
GO:0006023	aminoglycan biosynthetic process	26	1.1	GCNT2, GALNT5, CSPG4, BCAN, SDC4, DSE, TGFB1, ST3GAL2, SLC35D1, CHST11, ST3GAL6, B3GNT3, B3GNT2, CHST15, AGRN, B4GALT6, B4GALT5, CHST2, CHST3, GLCE, CHST7, CHSY3, CSGALNACT2, HAS2, EXT1, HS3ST3B1	1.8	0.0015
GO:0002224	regulation of muscle tissue development	27	1.2	MEF2C, FGFR1, NOG, TBX20, EDN1, GJA1, TGFB1, CYP26B1, SOX15, NRG1, NKX2-5, BMP4, BMP2, TGFBR1, TGFBR2, EFNB2, SMAD3, LEF1, CENPF, ARNTL, SIX4, SHOX2, NOTCH1, DKK1, MAPK14, SIX1, HDAC9	1.8	0.0016
GO:0051494	negative regulation of cytoskeleton organization	27	1.2	DLC1, LIMA1, APC2, S1PR1, GSN, TMSB15B, APC, ARHGEF2, SWAP70, TMSB10, SHANK1, MID1, MYADM, SLIT2, EML2, CORO1A, EPS8, TACSTD2, GMFG, PLEKHH2, CAPG, FHOD3, SPTBN1, TMOD3, TMSB4X, PHLDB2, SPTAN1	1.8	0.0016
GO:1901861	signal transduction in response to DNA damage	27	1.2	CAV1, TLR2, PTPN22, NFKBIA, ITGB2, TLR4, TLR6, MAP3K7, IRAK3, NR1D1, MAP3K1, CASP8, TRAF6, TNIP1, CHUK, IRAK2, PELI1, LY96, CTSS, PRKCE, BIRC3, RFTN1, TANK, CYBA, RIPK1, IRF1, TNFAIP3	1.8	0.0016
GO:0042770	toll-like receptor signaling pathway	27	1.2	E2F7, PML, AURKA, ANKRD1, SFN, PMAIP1, GTSE1, HIC1, CD44, SPRED2, BCL3, NDRG1, SPRED1, PLA2R1, MUC1, SP100, BRCA2, CDC5L, SNAI2, CENPJ, ATM, ATRX, PLK3, MAPK14, RGCC, CARM1, GADD45A	1.8	0.0016
GO:0046633	alpha-beta T cell proliferation	10	0.4	WNT5A, SPRY2, SPRY1, NOG, GATA3, FAM20C, NPTN, THBS1, RUNX2, DUSP6	3.1	0.00077
GO:0040036	p38MAPK cascade	10	0.4	ZFP36, ZFP36L1, HSPH1, BMP2, EZR, MAPK14, PTPN22, GADD45B, GADD45A, NR2C2	3.1	0.00077
GO:0038066	regulation of fibroblast growth factor receptor signaling pathway	10	0.4	SEMA5A, WNT5A, SEMA6B, SEMA4F, SEMA7A, SEMA3E, SEMA4C, SEMA4B, SEMA3C, SEMA3A	3.1	0.00077
GO:0048843	negative regulation of axon extension involved in axon guidance	10	0.4	CD55, DOCK2, ELF4, IL18, HLA-A, IRF1, PTPN22, IL15, HLA-E, EBI3	3.1	0.00077
GO:0060349	bone morphogenesis	21	0.9	MEF2C, BMP4, RARG, COL13A1, TGFBR2, SOX9, MMP14, SERPINH1, GLI3, TGFB1, SHOX2, NAB2, COL27A1, NAB1, CYP26B1, RAB23, SP5, HAS2, STC1, CARM1, RUNX2	2	0.0014
GO:0030203	glycosaminoglycan metabolic process	34	1.5	GCNT2, SPOCK3, GALNT5, CSPG4, BCAN, IL15, SDC4, DSE, TGFB1, ST3GAL2, CD44, SLC35D1, HPSE, ST3GAL6, CHST11, B3GNT3, B3GNT2, AGRN, CHST15, B4GALT6, B4GALT5, MKI67, PIM1, CHST2, CHST3, NDNF, GLCE, CHST7, CHSY3, CSGALNACT2, HAS2, FOXC1, EXT1, HS3ST3B1	1.7	0.0018
GO:0070527	platelet aggregation	15	0.6	ACTB, PIK3CG, TLN1, FERMT3, ACTN1, ITGB3, MYH9, GAS6, FLNA, VCL, MYL9, SERPINE2, UBASH3B, ILK, CEACAM1	2.3	0.0011
GO:0045930	negative regulation of mitotic cell cycle	43	1.8	CLSPN, BLM, TICRR, FHL1, E2F7, PML, TTK, AURKA, ZNF655, SFN, TIMP2, GTSE1, TGFB1, KANK2, ZFP36L1, ZFP36L2, BRINP2, MTBP, BUB1, TPR, TOP2A, BUB3, APC, BMP4, EGFR, MUC1, MSH2, CENPF, SMAD3, GPR132, RB1, HMGA2, CENPJ, ATM, ATRX, NABP1, PLK3, RFWD3, DUSP1, RGCC, FOXC1, CARM1, GADD45A	1.6	0.0019
GO:0051169	nuclear transport	81	3.5	XPO1, PTGS2, XPO5, IL18, XPO4, TLR2, PTPN22, RANGAP1, TLR4, GLI3, TGFB1, GTSE1, TGFB2, NOV, AKR1C3, TMEM173, DAB2, RAE1, MDFIC, RAB23, DDX20, TPR, EGFR, EGR2, SP100, HSP90AA1, ANP32E, SIX2, NLRP3, ECT2, HMGA1, PKIA, FLNA, HHEX, GNAQ, IPO7, KPNA7, KPNA4, KPNA3, CSF3, APC2, NFKBIE, PPP3R1, PML, AKAP13, NFKBIA, SFN, TCF7L2, SEMA5A, NUP214, NUP50, BCL3, GEMIN5, BMP4, NUP153, IL6, SMG6, HCLS1, TGFBR1,…	1.4	0.0023
GO:0010468	regulation of gene expression	600	25.6	MEF2C, FHIT, MEF2A, FSTL3, FSTL1, CLK1, ZNF638, RORA, MED20, MAP3K7, ACTG2, EPC2, MC1R, SERPINE2, RAE1, CTGF, ILK, FOXF2, SERPINE1, PHTF1, PIK3CA, PTBP3, OGT, CCNA1, ADAM8, STAG1, PTPRK, ZNF45, ROCK2, RCOR1, MED12, HMG20A, MYH9, MECOM, DCAF1, TOX2, ZNF37A, SERPINF1, MED15, MELTF, ZZZ3, VGLL3, ZNF516, NFKBIA, AHCTF1, HFE, ZNF619, HSPA1A, ZNF230, MYBL1, ZNF514, CTIF, HEXIM1, ARNTL2, VEZF1, ASXL2, Z…	1.1	0.0032
GO:0072078	nephron tubule morphogenesis	19	0.8	BMP4, NOG, BMP2, ADAMTS16, SIX4, SOX9, GLI3, TGFB1, FMN1, OSR1, FAT4, TACSTD2, LAMA5, WNK4, GATA3, PAX8, SIX1, ILK, FGF1	2.1	0.0014
GO:0055024	regulation of cardiac muscle tissue development	17	0.7	MEF2C, BMP4, FGFR1, BMP2, NOG, TGFBR1, TBX20, TGFBR2, EFNB2, EDN1, GJA1, TGFB1, NOTCH1, DKK1, MAPK14, NRG1, NKX2-5	2.2	0.0013
GO:0055008	cardiac muscle tissue morphogenesis	17	0.7	WNT5A, NOG, ACTC1, BMP2, TGFBR1, TBX20, ANKRD1, TGFB1, TGFB2, NOTCH1, S1PR1, XIRP2, HEG1, FOXC1, NRG1, NKX2-5, ENG	2.2	0.0013
GO:0010212	response to ionizing radiation	31	1.3	XRCC4, BLM, TICRR, PML, PMAIP1, BRSK1, TGFB1, IKBIP, NIPBL, GATA3, YAP1, EGR1, ICAM1, MSH2, ANXA1, BRCA2, IFI16, LIG4, HMGA2, SNAI2, ECT2, ATM, TANK, SOD2, DCLRE1C, CYBA, NABP1, THBD, RFWD3, MAPK14, GADD45A	1.7	0.0018
GO:0044091	cardiac epithelial to mesenchymal transition	11	0.5	BMP4, NOTCH1, BMP2, NOG, TGFBR1, TGFBR2, HAS2, SNAI2, ENG, ACVR1, TGFB2	2.8	0.00094
GO:0060317	membrane biogenesis	11	0.5	NOTCH1, LRP1, MELTF, ETS1, RGCC, SMAD3, ANTXR1, SOX9, PHLDB2, TGFB1, TGFB2	2.8	0.00094
GO:1903053	regulation of extracellular matrix organization	11	0.5	CAV2, CAV1, STX2, S100A10, SPTBN1, NLGN2, NLGN3, RFTN1, IL1RAPL1, LRP4, ANXA2	2.8	0.00094
GO:0050732	neuromuscular junction development	13	0.6	SH3BP5, CAV1, SOCS3, PTK6, CBL, ZFYVE28, INPP5F, SPINK1, PIBF1, SOCS4, ERRFI1, GPRC5A, MVP	2.5	0.0011
GO:0007528	negative regulation of peptidyl-tyrosine phosphorylation	13	0.6	COL4A1, ZC4H2, TNC, CACNB1, SIX4, CACNB4, NEDD4, SIX1, PTN, AGRN, LRRK2, ETV5, LRP4	2.5	0.0011
GO:1905207	regulation of cardiocyte differentiation	12	0.5	MEF2C, BMP4, EGFR, BMP2, DKK1, PRICKLE1, EDN1, EFNB2, NRG1, NKX2-5, TGFB1, TGFB2	2.6	0.0011
GO:1903510	mucopolysaccharide metabolic process	26	1.1	SPOCK3, CSPG4, BCAN, IL15, DSE, TGFB1, ST3GAL2, SLC35D1, CD44, CHST11, ST3GAL6, B3GNT3, B3GNT2, CHST15, B4GALT6, B4GALT5, MKI67, CHST2, PIM1, CHST3, GLCE, NDNF, CHST7, CHSY3, CSGALNACT2, HAS2	1.8	0.0017
GO:0002456	odontogenesis of dentin-containing tooth	20	0.9	PVR, ICAM1, MICB, IL6, HLA-A, HFE, HLA-B, HLA-E, NLRP3, IL7R, RFTN1, IL31RA, MAP3K7, CD55, RAET1E, GATA3, IL12A, CTSC, TRAF6, CEACAM1	2	0.0015
GO:0042475	T cell mediated immunity	20	0.9	BMP4, PPARA, BMP2, TNC, CSF1, FAM20C, ITGB4, LEF1, GLI3, ACVR2B, TNFRSF11B, ITGA6, ADM, HTRA1, LAMA5, FOXC1, CA2, TRAF6, RUNX2, LRP4	2	0.0015
GO:0051258	protein polymerization	47	2	CSF3, ABI2, ARHGAP18, FER, CCL26, CCL24, ACTR2, CDC42EP2, CDC42EP1, GSN, TRIM6, TMSB15B, WIPF1, CDC42EP3, RASA1, ICAM1, DNM3, CKAP5, HCLS1, NCKAP1L, TMSB10, RICTOR, PRKCE, UBE2C, MYADM, TUBGCP2, CENPJ, DCTN1, SLIT2, VASP, NCKAP1, EML2, FMN1, CORO1A, EPS8, GMFG, CAPG, FHOD3, FCHSD2, TMOD3, SPTBN1, CLIP1, TMSB4X, FCHSD1, DNM1, MAP7D3, SPTAN1	1.5	0.0022
GO:0043123	positive regulation of I-kappaB kinase/NF-kappaB signaling	37	1.6	S100A4, SLC20A1, ZC3HAV1, PTGS2, IL18, TLR2, GJA1, AKAP13, TLR4, LPAR1, TLR6, MAP3K7, NOD1, TRIM8, CASP8, PLEKHG5, TGM2, PELI2, TRAF6, TRAF5, CHUK, PELI1, BST2, LGALS1, SPHK1, CD40, PRKCE, BIRC3, ECM1, ECT2, FLNA, AJUBA, CASP10, CARD11, FYN, RIPK1, TRIP6	1.6	0.0021
GO:1903035	negative regulation of response to wounding	18	0.8	PLAT, PDGFA, EDN1, SMAD3, GJA1, ANXA2, PLAUR, EPHA4, THBD, SERPINE2, UBASH3B, SERPINE1, INPP5F, THBS1, PHLDB2, PROS1, CEACAM1, PLAU	2.1	0.0015
GO:0034103	regulation of tissue remodeling	18	0.8	EGFR, IL6, LEPR, IL18, PDK4, PML, GJA1, IL15, ITGB3, SIGLEC15, TGFB1, TNFRSF11B, S1PR1, UBASH3B, CA2, ADAM8, TNFAIP3, CEACAM1	2.1	0.0015
GO:0001649	osteoblast differentiation	39	1.7	MEF2C, NOG, PDLIM7, IFITM1, IL6ST, TNC, FAM20C, FHL2, GJA1, GLI3, TPM4, NOCT, SEMA7A, ILK, CREB3L1, DDX21, RUNX2, CYR61, BMP4, IL6, BMP2, SATB2, CEBPB, MRC2, LEF1, SMAD3, CDK6, WWTR1, SNAI2, JUNB, EPHA2, PTHLH, SHOX2, NOTCH1, ACVR2B, ID1, AREG, IGFBP3, ACVR1	1.6	0.0022
GO:0019219	regulation of nucleobase-containing compound metabolic process	568	24.3	MEF2C, FHIT, MEF2A, FSTL3, FSTL1, CLK1, ZNF638, RORA, MED20, MAP3K7, EPC2, MC1R, ILK, FOXF2, SERPINE1, DHX34, PHTF1, PIK3CA, PTBP3, OGT, ADAM8, CCNA1, STAG1, PTPRK, ZNF45, RCOR1, MED12, HMG20A, MECOM, DCAF1, TOX2, ZNF37A, MED15, ZZZ3, VGLL3, ZNF516, GNAI2, NFKBIA, AHCTF1, HFE, ZNF619, HSPA1A, ZNF230, MYBL1, ZNF514, HEXIM1, ARNTL2, VEZF1, ASXL2, ZNF69, ZNF624, KLF12, ZNF121, TGFBR1, KLF10, ASXL1, …	1.1	0.0035
GO:0031579	membrane raft organization	9	0.4	SH3BP5, CAV1, PTK6, CBL, ZFYVE28, SOCS4, ERRFI1, GPRC5A, MVP	3.2	0.00084
GO:0061099	negative regulation of protein tyrosine kinase activity	9	0.4	CAV2, DOCK2, CAV1, NPC1, MALL, S100A10, RFTN1, MYADM, ANXA2	3.2	0.00084
GO:0001890	placenta development	31	1.3	CSF2, PTGS2, E2F7, PPARG, ZFP36L1, LIF, PTK2, PEG10, ITGB8, HTRA1, CASP8, PLCD3, FOSL1, CYR61, EGFR, CEBPB, EPAS1, SOCS3, PLAC1, GJB3, LEF1, STK4, JUNB, GJB2, PLK4, ADM, MAPK14, STC1, PRDM1, SETD2, RBM15	1.7	0.002
GO:0051149	positive regulation of muscle cell differentiation	22	0.9	MEF2C, BMP4, MEF2A, EFNB2, EDN1, MMP14, NR2C2, TGFB1, FLT3LG, SHOX2, SPAG9, MAPK14, IL4R, CYP26B1, ILK, PLCB1, NRG1, EHD1, NFATC2, IGFBP3, ENG, EHD2	1.9	0.0017
GO:0060173	limb development	35	1.5	WNT5A, FRAS1, PAM, FGFR1, NOG, PLXNA2, CRABP2, ITGB4, GJA1, C5ORF42, SOX9, GLI3, TGFB2, NIPBL, ECE1, OSR1, CYP26B1, CHST11, SEMA3C, RUNX2, PCSK5, BMP4, RARG, MYH3, LEF1, MBNL1, SHOX2, FMN1, ATRX, NOTCH1, DKK1, ITGA6, GNAQ, LNPK, LRP4	1.6	0.0022
GO:0048736	appendage development	35	1.5	WNT5A, FRAS1, PAM, FGFR1, NOG, PLXNA2, CRABP2, ITGB4, GJA1, C5ORF42, SOX9, GLI3, TGFB2, NIPBL, ECE1, OSR1, CYP26B1, CHST11, SEMA3C, RUNX2, PCSK5, BMP4, RARG, MYH3, LEF1, MBNL1, SHOX2, FMN1, ATRX, NOTCH1, DKK1, ITGA6, GNAQ, LNPK, LRP4	1.6	0.0022
GO:0070665	positive regulation of leukocyte proliferation	30	1.3	MEF2C, SLC39A10, IL6ST, CSF1, IL18, PTPN22, TLR4, IL15, FLT3LG, CLCF1, NFATC2, TRAF6, EBI3, IL6, PELI1, IRS2, BST1, ANXA1, HLA-A, NCKAP1L, ATAD5, CD40, HLA-E, PDCD1LG2, CARD11, CORO1A, CD55, CD59, CD274, IL12A	1.7	0.002
GO:0051101	regulation of DNA binding	23	1	TAF1, PPARA, SP100, RSF1, MMP9, NFKBIA, LEF1, ITGA2, RB1, IFI16, HMGA2, TGFB1, PLAUR, LIF, HJURP, ID1, TRIM6, GATA3, CPNE1, BCL3, TRAF6, KLF4, ERCC2	1.9	0.0018
GO:0032946	positive regulation of mononuclear cell proliferation	29	1.2	MEF2C, SLC39A10, IL6ST, CSF1, IL18, PTPN22, TLR4, IL15, CLCF1, NFATC2, TRAF6, EBI3, PELI1, IRS2, IL6, BST1, ANXA1, HLA-A, NCKAP1L, ATAD5, CD40, HLA-E, PDCD1LG2, CARD11, CORO1A, CD55, CD59, CD274, IL12A	1.7	0.002
GO:0002673	positive regulation of smooth muscle cell proliferation	19	0.8	EGFR, BMP4, IL6, PTGS2, MMP9, IL18, TGFBR2, EDN1, ITGA2, STAT1, CYBA, S1PR1, EREG, AKR1B1, TGM2, HBEGF, PDGFD, THBS1, TRAF6	2	0.0017
GO:0048661	regulation of acute inflammatory response	19	0.8	PIK3CG, IL6, PTGS2, CFB, IL6ST, OSMR, C3, C5, PPARG, C4BPB, NLRP3, CFP, EDNRB, CD55, CD59, CFH, ADAM8, PROS1, GSTP1	2	0.0017
GO:0032663	regulation of interleukin-2 production	15	0.6	NRP2, LEF1, SEMA5A, CORO1C, EDNRB, SEMA6B, SEMA4F, LAMA5, SEMA7A, SEMA3E, SEMA4C, SEMA4B, SEMA3C, SEMA3A, ACVR1	2.3	0.0014
GO:0001755	neural crest cell migration	15	0.6	ZFP36, ANXA1, PDE4D, MAP3K7, CARD11, CD83, EZR, GATA3, PDE4B, SPTBN1, PRNP, TRAF6, RUNX1, TNFAIP3, GBP1	2.3	0.0014
GO:0071901	negative regulation of protein serine/threonine kinase activity	28	1.2	CAV1, STK38, PTPN22, SFN, LATS2, SPRY4, DUSP18, SPRY2, IRAK3, SPRY1, HEXIM1, CDKN2D, SPRED2, SPRED1, APC, BMP4, UBE2C, PKIA, GPS2, DUSP5, HHEX, DUSP4, DUSP1, RGS4, TNFAIP3, DUSP7, GSTP1, DUSP6	1.7	0.002
GO:0032635	interleukin-6 production	25	1.1	WNT5A, IL6, ARHGEF2, CEBPB, ADORA2B, TLR2, NCKAP1L, PTPN22, TLR4, TLR6, GAS6, DDX58, CYBA, IRAK3, NOD1, EREG, MAPK13, IL1RAP, RABGEF1, PAEP, TNFAIP3, TRAF6, KLF2, NLRP10, AKIRIN2	1.8	0.0019
GO:0044706	multi-multicellular organism process	42	1.8	PAM, SLC38A2, ADCY7, PTGS2, MMP9, IGFBP7, EDN1, HFE, TGFB1, ACVR1C, TIMP1, LIF, SERPINE2, ACSL4, FOSL1, PCSK5, ARHGDIB, MUC1, MAFF, TGFBR2, ITGA2, ITGA3, FOSB, PTGFR, JUNB, GJB2, PTHLH, CD55, IFI27, THBD, ADM, PRLR, SP1, ETS1, UCP2, AKR1B1, PSG4, STC1, SMURF2, SLC38A1, PRDM1, PLA2G4C	1.6	0.0024
GO:0018107	peptidyl-threonine phosphorylation	20	0.9	PRKCA, WNT5A, TAF1, PARD3, TGFBR1, SPHK1, TGFBR2, TTK, CLK1, OXSR1, DCAF1, TGFB1, DDIT4, SPRY2, OSR1, TRIM6, SPRED2, SPRED1, LRRK2, ACVR1	2	0.0018
GO:0051298	centrosome duplication	14	0.6	CEP120, ROCK2, CKAP5, CEP135, BRCA2, BRSK1, KIAA0753, TUBGCP2, CENPJ, CEP152, ARHGEF10, OFD1, PLK4, WDR62	2.4	0.0014
GO:0060761	negative regulation of response to cytokine stimulus	14	0.6	PXDN, CAV1, IL6, IL6ST, PPARG, ECM1, SLIT2, GAS6, IRAK3, NLRC5, ROBO1, RABGEF1, GSTP1, KLF4	2.4	0.0014
GO:0002828	regulation of type 2 immune response	10	0.4	STAT6, IL6, IL27RA, IL4R, IL18, HLX, GATA3, ANXA1, NLRP3, ECM1	2.9	0.0011
GO:0051099	positive regulation of binding	30	1.3	WNT5A, MEF2C, CSF3, CAV1, MMP9, HFE, TCF7L2, TGFB1, TGFB2, PLCL2, BDNF, TMEM173, TIAM1, GATA3, TRIM6, PLXND1, TRAF6, ERCC2, BMP4, TAF1, BMP2, S100A10, ITGA2, RB1, HMGA2, STK4, ANXA2, PLAUR, LRRK2, KLF4	1.7	0.0023
GO:0060231	cellular response to fluid shear stress	8	0.3	LIF, BMP4, GATA3, PAX8, SIX2, BASP1, STAT1, FZD7	3.5	0.00085
GO:0071498	mesenchymal to epithelial transition	8	0.3	MEF2C, PTGS2, HAS2, CA2, NFE2L2, KLF2, TFPI2, KLF4	3.5	0.00085
GO:0001938	thymocyte aggregation	18	0.8	BMP4, FZD8, CDK6, ZEB1, LIG4, IL7R, GLI3, FZD7, CLPTM1, ZFP36L1, ZFP36L2, CARD11, DOCK2, CAMK4, SOS1, GATA3, ADAM17, ADAM8	2.1	0.0018
GO:0071594	positive regulation of endothelial cell proliferation	18	0.8	NRP2, BMP4, WNT5A, PRKCA, CAV2, BMP2, TGFBR1, RICTOR, TNFSF12, ITGB3, ECM1, CCL26, CCL24, SEMA5A, VEGFC, CYBA, F3, SCG2	2.1	0.0018
GO:0090090	negative regulation of canonical Wnt signaling pathway	34	1.5	WNT5A, HECW1, CAV1, NOG, PPP2R3A, WNT5B, APC2, IGFBP6, BICC1, SOX9, TCF7L2, GLI3, LATS2, DAB2, NKX2-5, APC, EGR1, BMP2, LEF1, WWTR1, SNAI2, STK4, PSMB8, PSMB9, DKK3, NOTCH1, RGS20, DKK1, PRICKLE1, MAPK14, MCC, IGFBP1, IGFBP4, LRP4	1.6	0.0024
GO:0006898	receptor-mediated endocytosis	60	2.6	SYT1, PDLIM7, LDLR, SYNJ1, CANX, ASGR1, HSPH1, DAB2, PICALM, SMAP1, SAA1, SERPINE1, DLG4, RABGEF1, DNAJC6, LOXL4, CAP1, LOXL2, CEACAM1, EGFR, HSP90AA1, PRG4, CD163L1, ADM, LRP10, OPHN1, SSC5D, SNX9, CAV2, CAV1, SNAP91, CXCL8, HFE, ITGB2, ITGB1, SCARF1, LGALS3BP, EZR, PGBD1, INPP5F, PCSK9, PLA2R1, FCHO2, PRSS12, DNM3, CUBN, TGFBR2, CBL, NLGN3, TINAGL1, ANXA2, RAB31, LRP1, APOL1, DKK1, NEDD4, PLCG2…	1.4	0.0029
GO:0045687	cortical actin cytoskeleton organization	11	0.5	STAT6, IL6, IL27RA, IL4R, IL18, HLX, GATA3, ANXA1, BCL3, NLRP3, IL31RA	2.7	0.0013
GO:0042092	type 2 immune response	11	0.5	KIF23, FMNL1, EPB41L2, FMNL2, TLN1, EZR, ROCK1, ROCK2, NCKAP1L, WIPF1, EHD2	2.7	0.0013
GO:0030866	positive regulation of glial cell differentiation	11	0.5	LIF, ZNF488, NOTCH1, BMP2, SERPINE2, CXCR4, CLCF1, IL6ST, PPARG, TLR2, NKX6-1	2.7	0.0013
GO:2001185	venous blood vessel morphogenesis	6	0.3	HLA-A, IRF1, HFE, NCKAP1L, PTPN22, HLA-E	4.8	0.00053
GO:0048845	regulation of CD8-positive, alpha-beta T cell activation	6	0.3	NOTCH1, TBX20, EFNB2, CCBE1, HEG1, ENG	4.8	0.00053
GO:0030225	response to epidermal growth factor	12	0.5	EGFR, FGFR1, IL6, LAMA5, PDGFA, NTN4, TGM2, SEMA3C, SEMA3A, PLXND1, TGFB1, TGFB2	2.6	0.0014
GO:0070849	positive regulation of cytokinesis	12	0.5	LIF, PRKCA, BMP4, CASP10, INHBA, HCLS1, CSF1, RIPK1, MMP9, CASP8, RB1, IL31RA	2.6	0.0014
GO:0030865	macrophage differentiation	12	0.5	KIF23, FMNL1, EPB41L2, FMNL2, TLN1, EZR, ROCK1, ROCK2, NCKAP1L, PAFAH1B1, WIPF1, EHD2	2.6	0.0014
GO:0007431	cortical cytoskeleton organization	12	0.5	KIF23, KIF14, CSPP1, MAP10, SVIL, KIF20B, PKN2, CENPV, AURKB, PRKCE, CIT, ECT2	2.6	0.0014
GO:0032467	salivary gland development	12	0.5	ZFP36, ZFP36L1, EGFR, ZFP36L2, ID1, TPR, SNAI2, SOX9, ERRFI1, IQGAP1, GSTP1, PTPN12	2.6	0.0014
GO:0045667	regulation of osteoblast differentiation	25	1.1	MEF2C, NOG, IFITM1, PDLIM7, IL6ST, FAM20C, GJA1, GLI3, NOCT, PTK2, ILK, RUNX2, CYR61, BMP4, BMP2, IL6, CEBPB, SMAD3, CDK6, SNAI2, ACVR2B, NOTCH1, ID1, AREG, ACVR1	1.8	0.0022
GO:0045637	regulation of myeloid cell differentiation	38	1.6	CSF3, MEF2C, CSF1, FSTL3, NFKBIA, TLR4, LIF, ZFP36L1, MEIS2, SMAP1, ISG15, UBASH3B, CASP8, OGT, RUNX1, TRAF6, CEACAM1, PRKCA, ZFP36, RBFOX2, RARG, CEBPB, KLF10, HCLS1, FBN1, LEF1, NCKAP1L, CDK6, RB1, SIGLEC15, INHBA, CAMK4, ETS1, MAPK14, RIPK1, CA2, RBM15, TOB2	1.6	0.0027
GO:0017038	protein import	59	2.5	PTGS2, IL18, TLR2, PTPN22, TLR4, GLI3, TGFB1, TGFB2, NOV, AKR1C3, TMEM173, DAB2, RAE1, MDFIC, RAB23, TPR, EGFR, HSP90AA1, SIX2, NLRP3, ECT2, PKIA, FLNA, GNAQ, IPO7, KPNA7, KPNA4, KPNA3, CSF3, APC2, NFKBIE, PPP3R1, PML, NFKBIA, SEMA5A, NUP214, NUP50, BCL3, BMP4, IL6, NUP153, RAB8B, TGFBR1, HCLS1, SPHK1, LMNA, SMAD3, SNAI2, WWTR1, GAS6, FZD7, DDX58, RGS20, PDE2A, PRICKLE1, MAPK14, SPTBN1, SNX33, TR…	1.4	0.0031
GO:0010934	macrophage cytokine production	7	0.3	WNT5A, IRAK3, SEMA7A, TLR4, TGFB1, GAS6, TGFB2	4	0.00076
GO:0045165	cell fate commitment	46	2	MEF2C, WNT5A, FGFR1, WNT5B, FOXA2, MCL1, APC2, POU6F2, PPARG, PML, RORA, SOX9, ITGB1, TCF7L2, GLI3, LATS2, TGFB2, STAT6, SPRY2, GATA3, CYP26B1, NKX2-1, NRG1, RUNX2, NKX2-5, APC, BMP4, IL6, BMP2, SATB2, CEBPB, EPAS1, TGFBR1, SIX2, ZNF521, NKX6-1, FZD7, NOTCH2, NOTCH1, DKK1, ETS2, SIX1, PRDM1, KLF4, ACVR1, DUSP6	1.5	0.0029
GO:0030239	positive regulation of fat cell differentiation	15	0.6	KLF5, ZFP36, ASXL2, BMP2, WNT5B, CEBPB, PTGS2, PPARG, SNAI2, STK4, NOCT, ZFP36L1, MAPK14, METRNL, CARM1	2.2	0.0018
GO:0045600	myofibril assembly	15	0.6	ACTC1, MEF2A, MYH3, EDN1, ACTN2, SIX4, ANKRD1, ITGB1, MYPN, CFL2, FHOD3, MYH11, OBSL1, TMOD3, NKX2-5	2.2	0.0018
GO:0060675	ureteric bud morphogenesis	17	0.7	BMP4, BMP2, NOG, ADAMTS16, SIX4, SOX9, GLI3, TGFB1, FMN1, FAT4, TACSTD2, LAMA5, GATA3, PAX8, SIX1, ILK, FGF1	2.1	0.0019
GO:0030111	regulation of Wnt signaling pathway	57	2.4	NOG, HECW1, BTRC, IGFBP6, TLR2, GLI3, LATS2, DAB2, MDFIC, TIAM1, ILK, YAP1, ASPM, EGR1, TRABD2A, MED12, LEF1, ARNTL, HMGA2, STK4, HHEX, MCC, LRRK2, WNT5A, CAV1, PPP2R3A, WNT5B, APC2, BICC1, SOX9, TCF7L2, TCF7L1, HIC1, MACF1, HMGXB4, USP34, NKX2-5, APC, BMP2, ITGA3, SNAI2, WWTR1, FZD4, PSMB8, PSMB9, DKK3, NOTCH1, RGS20, LRP1, DKK1, PRICKLE1, CSNK1E, MAPK14, SMURF2, IGFBP1, LRP4, IGFBP4	1.4	0.0031
GO:0072331	signal transduction by p53 class mediator	34	1.5	ZMAT1, FHIT, E2F7, PML, AURKA, ANKRD1, SFN, PMAIP1, GTSE1, HIC1, CD44, HEXIM1, SH3GLB1, SPRED2, BCL3, NDRG1, SPRED1, PLA2R1, MUC1, SP100, TP53BP2, MSH2, BRCA2, SMYD2, IFI16, SNAI2, CENPJ, ATM, DDIT4, ATRX, PLK3, RGCC, CARM1, GADD45A	1.6	0.0027
GO:0071822	protein complex subunit organization	246	10.5	SYT1, PICALM, PLOD3, ILK, COL12A1, GBP5, TRABD2A, RAP1GDS1, CD40, DCTN1, SPAG9, FCHSD2, PDE4DIP, FCHSD1, GSDMD, AHCTF1, HFE, OAS1, SERPINH1, SEMA5A, CDC42EP2, CDC42EP1, CDA, CDC42EP3, NKX2-5, FCHO2, TGFBR1, SMAD3, S100A10, NCKAP1L, NCKAP1, EPS8, CNIH3, PTCD3, ICE1, CD59, SUPT16H, TMOD3, AREG, KAT6B, LIMA1, FERMT3, TBX20, FERMT2, SYNJ1, GJA1, NAP1L3, ACTR2, NOD1, GPX3, TMSB15B, IL1RAP, SERPINA1, F…	1.2	0.0041
GO:0031334	positive regulation of protein complex assembly	43	1.8	MEF2C, ARID4A, KMT2A, CSF1, PMAIP1, IL7R, SOX9, TGFB1, FLT3LG, TGFB2, NOV, ZFP36L1, SMAP1, ISG15, GATA3, SOS1, PDE4B, PTBP3, DYRK3, AFDN, SKIL, ERCC2, ZFP36, BMP4, RBFOX2, SPNS2, IL6, EPAS1, HCLS1, ANXA1, AXL, NCKAP1L, RB1, AMPD3, PTPN11, WDR48, INHBA, CORO1A, ETS1, MAPK14, TMOD3, KLF2, TNFAIP3	1.5	0.003
GO:0048872	homeostasis of number of cells	43	1.8	CSF3, SNX9, CSF2, SLF2, ABI2, TLR4, PMAIP1, FER, TLR6, MMP1, TGFB1, CCL26, SETX, CCL24, ACTR2, CDC42EP2, CDC42EP1, SH3GLB1, GSN, MSN, WIPF1, FOSL1, CDC42EP3, NKX2-5, ERCC2, ICAM1, TAF1, GBP5, TRABD2A, DDB1, NCKAP1L, RICTOR, PRKCE, VASP, DCTN1, NCKAP1, AJUBA, FMN1, CORO1A, GMFG, ICE1, CAPG, CLIP1	1.5	0.003
GO:0050710	negative regulation of cytokine secretion	14	0.6	MEF2C, ZFP36L1, BMP4, NOTCH1, PRICKLE1, IL18, MAPK14, ILK, PLCB1, SOX9, IGFBP3, NR2C2, TGFB1, FLT3LG	2.3	0.0018
GO:0045661	regulation of myoblast differentiation	14	0.6	IL6, PTGER4, ANXA1, PML, PTPN22, NLRP3, GAS6, EZR, RGCC, RABGEF1, SSC5D, SRGN, FN1, GBP1	2.3	0.0018
GO:0090189	regulation of branching involved in ureteric bud morphogenesis	9	0.4	BMP4, NOG, TACSTD2, PAX8, SIX1, SIX2, SIX4, SOX9, TGFB1	3.1	0.0012
GO:0051961	negative regulation of nervous system development	49	2.1	NOG, LPAR1, GLI3, TGFB1, EDNRB, SEMA7A, SEMA3E, SEMA3C, IL15RA, SEMA3A, NRG1, ASPM, NR2F1, GPR173, ARHGEF2, ARHGEF1, PTPRG, HMG20A, HMGA2, SLIT2, MAP4K4, MIB1, SEMA4F, SEMA4C, SEMA4B, CARM1, PMP22, WNT5A, VIM, ASAP1, SOX9, EPHB2, SEMA5A, PTK2, BCL11A, PTN, INPP5F, PAFAH1B1, DNM3, LGALS1, NLGN3, NKX6-1, EPHA4, SEMA6B, NOTCH1, LRP1, ID1, KCTD11, LRP4	1.5	0.0033
GO:0002718	B cell activation involved in immune response	16	0.7	WNT5A, IL6, BST2, HLA-A, HFE, TLR4, NLRP3, TGFB1, TGFB2, MAP3K7, CD96, IRAK3, TRIM6, SEMA7A, GATA3, TRAF6	2.2	0.002
GO:0002312	regulation of cytokine production involved in immune response	16	0.7	EXO1, IL27RA, MSH2, SWAP70, LGALS1, ATAD5, TLR4, CD40, LIG4, TGFB1, PLCL2, STAT6, NOTCH2, CLCF1, PLCG2, BCL3	2.2	0.002
GO:0045862	positive regulation of proteolysis	63	2.7	DLC1, BTRC, PPARG, TNFSF15, RNF217, AURKA, PMAIP1, ACVR1C, DAB2, PICALM, NOD1, CASP8AP2, CTGF, ROBO1, GSN, CASP8, CCBE1, ASPH, DAP, OGT, ADAM8, AKIRIN2, CYR61, SOCS4, IFI16, NLRP3, MYH9, MMP14, UBE2C, NLRP1, TANK, PCOLCE2, PPM1F, MELTF, F3, RIPK1, CTSC, NFE2L2, LRRK2, SNX9, CAV1, C3, PML, HSPA1A, TRIB2, PTK2, BUB3, FN1, TAF1, CARD8, SMAD3, FURIN, CDC27, PSMB8, PSMB9, IFI27, PLK3, PRICKLE1, CSNK1E…	1.4	0.0035
GO:1904407	regulation of bone remodeling	13	0.6	IL6, PXDN, CAV1, IL6ST, PPARG, ECM1, GAS6, SLIT2, NLRC5, IRAK3, ROBO1, RABGEF1, GSTP1	2.4	0.0018
GO:0045429	positive regulation of nitric oxide metabolic process	13	0.6	EGFR, ICAM1, IL6, HSP90AA1, PTGS2, EDN1, SMAD3, TLR4, ITGB2, KLF2, PTX3, KLF4, SOD2	2.4	0.0018
GO:0046850	negative regulation of cytokine-mediated signaling pathway	13	0.6	EGFR, ICAM1, IL6, HSP90AA1, PTGS2, EDN1, SMAD3, TLR4, ITGB2, KLF2, PTX3, KLF4, SOD2	2.4	0.0018
GO:0001960	positive regulation of nitric oxide biosynthetic process	13	0.6	EGFR, TNFRSF11B, IL6, S1PR1, UBASH3B, LEPR, PDK4, GJA1, CA2, ITGB3, ADAM8, TNFAIP3, SIGLEC15	2.4	0.0018
GO:0008045	positive regulation of mesenchymal cell proliferation	10	0.4	EPHA4, PLXNC1, NOG, EGR2, PLXNA2, CHN1, SEMA3A, PLXND1, SLIT2, ETV4	2.8	0.0015
GO:0043516	motor neuron axon guidance	10	0.4	CAV1, PTK2, NOTCH1, MCL1, ITGA5, PDK4, PIK3CA, SIK1, SNAI2, ITGB1	2.8	0.0015
GO:0043276	anoikis	10	0.4	CD44, SPRED2, ANKRD1, SPRED1, PMAIP1, SMYD2, SNAI2, PLA2R1, ATM, HIC1	2.8	0.0015
GO:0002053	regulation of DNA damage response, signal transduction by p53 class mediator	10	0.4	SHOX2, WNT5A, FGFR1, IRS2, PDGFA, SIX1, TGFBR2, STAT1, SOX9, FOXP2	2.8	0.0015
GO:1903506	regulation of nucleic acid-templated transcription	503	21.5	MEF2C, FHIT, MEF2A, FSTL3, FSTL1, ZNF638, RORA, MED20, MAP3K7, EPC2, MC1R, FOXF2, SERPINE1, ILK, PHTF1, OGT, ADAM8, CCNA1, STAG1, PTPRK, ZNF45, RCOR1, MED12, HMG20A, MECOM, DCAF1, TOX2, ZNF37A, MED15, ZZZ3, VGLL3, ZNF516, NFKBIA, AHCTF1, HFE, HSPA1A, ZNF619, ZNF230, MYBL1, ZNF514, HEXIM1, ARNTL2, VEZF1, ZNF69, ASXL2, ZNF624, KLF12, ZNF121, TGFBR1, KLF10, ASXL1, SPHK1, ZNF521, TFCP2, ZNF626, GAS6,…	1.1	0.005
GO:0045824	negative regulation of innate immune response	12	0.5	NLRC5, IRAK3, CD96, NMI, PPARG, HLA-A, HLA-B, IFI16, HLA-E, TNFAIP3, CEACAM1, DHX58	2.5	0.0018
GO:0019058	viral life cycle	77	3.3	PVR, XPO1, RSF1, ZC3HAV1, LDLR, DEK, MITD1, APOBEC3C, ISG20, APOBEC3D, SLC1A5, TRIM8, ISG15, CXCR4, RAE1, GSN, MDFIC, PCBP1, TRIM6, TPR, TOP2A, TNIP1, ZFP36, ICAM1, SP100, BST2, ROCK2, DDB1, EFNB2, PKN2, LEF1, IFI16, HMGA2, SRPK1, STOM, NPC1, KPNA7, KPNA4, PDCD6IP, KPNA3, CAV2, CAV1, IFITM1, IFITM2, IFITM3, OAS3, PML, CXCL8, OAS1, EEA1, HSPA1A, ITGB3, ITGB1, POLR2A, NUP214, TAP2, ITGAV, NUP50, CH…	1.3	0.004
GO:0030574	collagen catabolic process	17	0.7	COL18A1, COL4A2, COL4A1, COL13A1, MMP9, MMP19, MRC2, CTSS, MMP14, FURIN, COL5A1, MMP1, COL7A1, COL6A3, COL6A2, COL12A1, COL8A1	2.1	0.0023
GO:0071364	cellular response to epidermal growth factor stimulus	11	0.5	ZFP36, ZFP36L1, EGFR, ZFP36L2, ID1, SNAI2, SOX9, ERRFI1, IQGAP1, GSTP1, PTPN12	2.6	0.0017
GO:0010633	negative regulation of epithelial cell migration	15	0.6	EXO1, IL27RA, MSH2, SWAP70, LIG1, LEF1, ATAD5, CD40, LIG4, DCAF1, ATM, TGFB1, DCLRE1C, STAT6, CLCF1	2.2	0.0022
GO:0016444	somatic diversification of immune receptors via germline recombination within a single locus	15	0.6	EXO1, IL27RA, MSH2, SWAP70, LIG1, LEF1, ATAD5, CD40, LIG4, DCAF1, ATM, TGFB1, DCLRE1C, STAT6, CLCF1	2.2	0.0022
GO:0002562	somatic cell DNA recombination	15	0.6	CORO1C, NOTCH1, SP100, SERPINF1, PTPRG, TACSTD2, RGCC, STC1, MCC, SEMA3A, THBS1, TGFB1, KLF4, SLIT2, STARD13	2.2	0.0022
GO:0048511	rhythmic process	56	2.4	PPARA, BTRC, PPARG, RORA, NOCT, SETX, TGFB2, KISS1, SERPINE1, OGT, CRY1, BHLHE41, SIK1, TOP2A, EGFR, EGR1, ICAM1, EGR2, ROCK2, RELB, MMP19, HES7, ARNTL, MMP14, SLIT2, AHR, INHBA, EREG, SERPINF1, GNAQ, HTR7, HAS2, FOXC1, CSF2, PAM, KMT2A, KMT2B, PML, TIMP4, NPAS2, NR1D1, NKX2-1, PTN, ARNTL2, BHLHE40, IL6, CEBPB, KLF10, AXL, ANXA1, FZD4, SP1, CSNK1E, ID1, ETS1, NCOR2	1.4	0.0038
GO:0002688	regulation of leukocyte chemotaxis	23	1	WNT5A, CXCL1, IL6, MPP1, SWAP70, CXCL3, CSF1, C5, GPSM3, CXCL2, CXCL8, NCKAP1L, SLIT2, GAS6, NOV, VEGFC, RAC2, SERPINE1, IL12A, ADAM17, THBS1, ANO6, CAMK1D	1.8	0.0028
GO:0006979	response to oxidative stress	68	2.9	MICB, PXDN, CPEB2, PTGS2, EDN1, PDLIM1, FER, PAWR, AQP1, SETX, AKR1C3, HSPH1, MSRA, SLC25A24, GPX3, GPX8, PDGFD, FOSL1, CHUK, EGFR, PTPRK, STX2, ARNTL, MMP14, ECT2, ALDH3B1, RIPK1, KPNA4, NFE2L2, PRNP, LRRK2, TNFAIP3, GSTP1, MCL1, FUT8, PML, HSPA1A, STAT6, ERO1A, PLA2R1, ETV5, ERCC2, IL6, GNAO1, EPAS1, MET, AXL, ANXA1, NR4A2, OXSR1, PRR5L, STAT1, MSRB3, SOD2, GJB2, ATP7A, CYBA, PLK3, DUSP1, ETS1,…	1.4	0.004
GO:0009952	anterior/posterior pattern specification	39	1.7	WNT5A, NOG, PPP2R3A, FOXA2, KMT2A, PLXNA2, AURKA, GLI3, OSR1, SEMA3C, PCSK5, BMP4, BMP2, RARG, PLD6, TGFBR1, PGAP1, MED12, SIX2, LEF1, SMAD3, HES7, BASP1, CELSR1, ATM, FEZF1, HOXB3, MIB1, HHEX, NOTCH1, RGS20, ACVR2B, DKK1, CRKL, HOXD3, ETS2, HOXD4, FOXC1, HOXB9	1.5	0.0035
GO:0002702	regulation of protein depolymerization	18	0.8	LIMA1, NES, ARHGEF2, APC2, SWAP70, ACTN2, MID1, SEMA5A, EPS8, PLEKHH2, GSN, CFL2, CAPG, SPTBN1, TMOD3, SH3BGRL3, SPTAN1, APC	2	0.0025
GO:1901879	positive regulation of production of molecular mediator of immune response	18	0.8	WNT5A, IL6, HLA-A, PTPN22, TLR4, ATAD5, CD40, HLA-E, NLRP3, TGFB1, MAP3K7, STAT6, CLCF1, TRIM6, IL4R, SEMA7A, GATA3, TRAF6	2	0.0025
GO:0030509	BMP signaling pathway	29	1.2	WNT5A, NOG, CAV1, FSTL3, HFE, FSTL1, RGMB, HTRA1, ILK, HTRA3, SKIL, NKX2-5, RUNX2, CYR61, EGR1, BMP4, BMP2, FBN1, LEF1, NOTCH1, ACVR2B, CHRDL1, DKK1, ID1, SMURF2, SMURF1, ENG, LRP4, ACVR1	1.7	0.0032
GO:0002460	adaptive immune response based on somatic recombination of immune receptors built from immunoglobulin superfamily domains	52	2.2	MEF2C, PVR, MICB, IL27RA, APLF, IL18, TLR4, RORA, TLR6, TGFB1, IL31RA, MAP3K7, RAET1E, CLCF1, HLX, IL4R, GATA3, EBI3, CEACAM1, ICAM1, RELB, HLA-A, LEF1, CD40, LIG4, HLA-B, RFTN1, HLA-E, NLRP3, UNC13D, IL12A, ADAM17, CTSC, TNFAIP3, C3, C5, HFE, IL7R, STAT6, POU2F2, BCL3, TRAF6, EXO1, IL6, SWAP70, IL1RL1, MSH2, ANXA1, ATAD5, C4BPB, CD55, NLRP10	1.4	0.0039
GO:0043011	pinocytosis	8	0.3	FYN, CBL, PTN, HAS2, PDGFD, FER, ERRFI1, IQGAP1	3.3	0.0013
GO:0006907	response to platelet-derived growth factor	8	0.3	BATF3, CSF2, BATF2, CAMK4, RELB, TGFBR2, TRAF6, TGFB1	3.3	0.0013
GO:0036119	myeloid dendritic cell differentiation	8	0.3	DOCK2, CAV1, ACTN4, RAB34, AXL, SNX33, ANKFY1, EHD4	3.3	0.0013
GO:0002763	exocrine system development	14	0.6	DLGAP5, CENPF, TTK, CENPE, ESPL1, RB1, UBE2C, CDC27, ATM, DUSP1, BUB1, TPR, BUB3, APC	2.3	0.0022
GO:0010965	lipopolysaccharide-mediated signaling pathway	14	0.6	PRKCA, KLF10, CSF1, HCLS1, LEF1, RB1, LIF, ZFP36L1, RIPK1, CASP8, CA2, OGT, RUNX1, TRAF6	2.3	0.0022
GO:0031663	regulation of mitotic sister chromatid separation	14	0.6	EGFR, FGFR1, IL6, LAMA5, PDGFA, NTN4, TGM2, SEMA3C, FOXC1, SEMA3A, SOX9, PLXND1, TGFB1, TGFB2	2.3	0.0022
GO:0035272	positive regulation of myeloid leukocyte differentiation	14	0.6	PRKCA, IRAK2, LY96, IL18, TLR2, PTPN22, NFKBIA, TLR4, PRKCE, TGFB1, MAPK14, PRDM1, TRAF6, TNFAIP3	2.3	0.0022
GO:0070925	organelle assembly	105	4.5	MEF2C, RAB3GAP2, KIFC1, MEF2A, EDN1, AURKA, ANKRD1, AURKB, TBC1D12, STARD9, RAB23, CEP290, ASPM, RRP7A, MYH3, ACTN2, SIX4, KIAA0753, CEP152, TBC1D22A, CEP162, MCIDAS, PDCD6IP, LRRK2, KIF4A, C11ORF63, TMEM216, AKAP13, CEP164, ANLN, ITGB1, OBSL1, NKX2-5, ALMS1, ARMC4, PIBF1, PLK4, CORO1A, POC1B, WDR62, LAMA5, DZIP1L, MYH11, TMOD3, FAM161A, PIP4K2A, ATG16L2, KIF23, KIF24, KIF27, MYO7A, SDC4, NOCT, O…	1.3	0.0047
GO:0002703	regulation of leukocyte mediated immunity	32	1.4	PVR, IL27RA, ADORA2B, APLF, C3, HFE, TLR4, FER, IL7R, TGFB1, MAP3K7, STAT6, CD96, RAC2, GAB2, CLCF1, IL4R, GATA3, RABGEF1, TRAF6, CEACAM1, IL6, BST2, HLA-A, C4BPB, ATAD5, HLA-B, CD40, HLA-E, NLRP3, UNC13D, IL12A	1.6	0.0034
GO:0045669	positive regulation of osteoblast differentiation	16	0.7	PLAT, PDGFA, EDN1, GJA1, SMAD3, ANXA2, PLAUR, THBD, SERPINE2, UBASH3B, SERPINE1, THBS1, PHLDB2, PROS1, CEACAM1, PLAU	2.1	0.0025
GO:0061045	negative regulation of wound healing	16	0.7	MEF2C, BMP4, BMP2, IL6, CEBPB, PDLIM7, IFITM1, IL6ST, FAM20C, GJA1, GLI3, ACVR2B, ILK, RUNX2, ACVR1, CYR61	2.1	0.0025
GO:0042045	epithelial fluid transport	5	0.2	CSF2, EDNRB, EDN1, AQP1, ITPR1	5.7	0.00053
GO:0035507	regulation of myosin-light-chain-phosphatase activity	5	0.2	ROCK1, ROCK2, NUAK1, PPP1R12A, NCKAP1L	5.7	0.00053
GO:0050714	positive regulation of protein secretion	41	1.8	WNT5A, C5, GSDMD, ANO1, GJA1, PTPN22, ANKRD1, TCF7L2, TGFB1, IL17RA, TGFB2, EZR, SAA1, GATA3, IL4R, TRIM6, IL1RAP, ADAM8, EGFR, IL6, CARD8, IRS2, PTGER4, KIF5B, IL1RL1, RPH3AL, NLGN2, PRKCE, HLA-E, NLRP3, NLRP1, NKX6-1, KCNN4, VEGFC, MAPK14, CD274, CD58, RGCC, SPTBN1, PAEP, NLRP10	1.5	0.0038
GO:0001843	neural tube closure	21	0.9	WNT5A, DLC1, BMP4, NOG, RARG, MED12, TEAD2, CELSR1, FZD2, SDC4, MTHFD1L, VASP, TGFB1, TGFB2, PRICKLE1, ADM, SEMA4C, KIF20B, APAF1, TRAF6, SETD2	1.9	0.003
GO:0045807	regulation of myeloid leukocyte differentiation	25	1.1	PRKCA, CEBPB, HCLS1, KLF10, CSF1, FBN1, FSTL3, LEF1, TLR4, CDK6, RB1, SIGLEC15, ZFP36L1, LIF, INHBA, CAMK4, UBASH3B, RIPK1, CASP8, CA2, OGT, TRAF6, RUNX1, CEACAM1, TOB2	1.8	0.0033
GO:0002761	positive regulation of endocytosis	25	1.1	WNT5A, ACTN4, C3, PPARG, SYNJ1, CBL, AXL, ITGA2, NCKAP1L, HFE, MFGE8, GAS6, ANXA2, MIB1, CYBA, DOCK2, DAB2, ITGAV, PLCG2, SERPINE1, PCSK9, PTX3, ANO6, ANKFY1, CAMK1D	1.8	0.0033
GO:0014020	primary neural tube formation	22	0.9	WNT5A, DLC1, BMP4, NOG, RARG, MED12, TEAD2, LUZP1, CELSR1, FZD2, SDC4, MTHFD1L, TGFB1, VASP, TGFB2, PRICKLE1, ADM, SEMA4C, KIF20B, APAF1, TRAF6, SETD2	1.8	0.0031
GO:0090307	mitotic spindle assembly	13	0.6	WNT5A, STAT6, BMP4, CAV1, BTRC, CSF1, TGFBR2, PML, AREG, GLI3, ETV4, TGFB1, EPHA2	2.3	0.0023
GO:0060443	mammary gland morphogenesis	13	0.6	KIF23, OFD1, KIFC1, KIF4A, MAP10, KIF11, TPX2, PIBF1, AURKB, BIRC3, TUBGCP2, FLNA, ARHGEF10	2.3	0.0023
GO:0032755	positive regulation of interleukin-6 production	17	0.7	WNT5A, BMP4, WNT5B, TDRD7, TGFBR1, TGFBR2, VIM, SMAD3, GJA1, NECTIN3, NHS, EPHA2, TGFB1, GATA3, SKIL, SLITRK6, BCAR3	2	0.0027
GO:0002088	lens development in camera-type eye	17	0.7	WNT5A, IL6, ARHGEF2, ADORA2B, TLR2, TLR4, TLR6, DDX58, CYBA, NOD1, EREG, MAPK13, IL1RAP, PAEP, TRAF6, AKIRIN2, NLRP10	2	0.0027
GO:0010927	cellular component assembly involved in morphogenesis	53	2.3	MEF2A, KIF24, KIF27, EDN1, TLR2, ANKRD1, ACTR2, ANK2, ILK, RAB23, CEP290, CNTNAP1, WDR35, CCNO, MYH3, KIAA0586, ACTN2, SIX4, FLNA, CEP162, CFL2, MCIDAS, FHOD3, CEP120, C11ORF63, CEP126, TMEM216, ABLIM3, CEP164, C5ORF42, ITGB1, OBSL1, PAFAH1B1, UGT8, EHD1, NKX2-5, ERCC2, SCLT1, ACTC1, CEP135, ARMC4, ALMS1, PIBF1, CENPJ, POC1B, KNL1, LAMA5, MYPN, DZIP1L, MYH11, FAM161A, TMOD3, PHLDB2	1.4	0.0043
GO:0045184	establishment of protein localization	291	12.4	RAB3GAP2, SEC31B, PTGS2, LTBP2, PLEKHM1, REP15, PTPN22, RANGAP1, NOV, VPS13C, RAE1, RAB23, CEP290, RAPGEF4, ADAM8, GBP5, TTC7A, ROCK1, KIF5B, ROCK2, UGCG, OPTN, CD40, MYH9, VEGFC, NPC1, ADAMTS9, RGCC, TBC1D8B, CCDC93, NFKBIE, GSDMD, AKAP12, NFKBIA, AHCTF1, RIMS2, ARFGEF2, SEMA5A, TRAM2, RAC2, HNMT, MACF1, NUP50, EFR3A, STX11, BMP4, RHBDF2, IL1RL1, TP53BP2, TGFBR1, SPHK1, PTPN14, SMAD3, S100A10, N…	1.1	0.0055
GO:0051047	positive regulation of secretion	62	2.6	SYT1, ANO1, EDN1, PTPN22, GJA1, ANKRD1, AQP1, SDC4, IL17RA, TGFB1, TGFB2, KISS1, EDNRB, GAB2, SAA1, GATA3, TRIM6, IL4R, IL1RAP, ADAM8, EGFR, IRS2, STX1A, KIF5B, PTGER4, RPH3AL, NLRP3, HLA-E, PRKCE, NLRP1, VEGFC, INHBA, UNC13D, RGCC, PAEP, PDCD6IP, WNT5A, FGFR1, CDK5R2, ADORA2B, C5, GSDMD, HFE, TCF7L2, EZR, P2RY2, PLA2R1, IL6, CARD8, RAB8B, IL1RL1, NLGN2, DPYSL2, NKX6-1, PTPN11, CYBA, KCNN4, MAPK1…	1.4	0.0045
GO:0030041	actin filament polymerization	32	1.4	CSF3, ABI2, FER, CCL26, CCL24, ACTR2, CDC42EP2, CDC42EP1, GSN, TMSB15B, WIPF1, CDC42EP3, ICAM1, HCLS1, NCKAP1L, TMSB10, RICTOR, PRKCE, MYADM, SLIT2, VASP, NCKAP1, FMN1, CORO1A, EPS8, GMFG, CAPG, FHOD3, TMOD3, SPTBN1, TMSB4X, SPTAN1	1.6	0.0038
GO:0050671	positive regulation of lymphocyte proliferation	28	1.2	MEF2C, SLC39A10, IL6ST, IL18, PTPN22, TLR4, IL15, CLCF1, NFATC2, TRAF6, EBI3, PELI1, IRS2, IL6, BST1, ANXA1, HLA-A, NCKAP1L, ATAD5, CD40, HLA-E, PDCD1LG2, CARD11, CORO1A, CD55, CD59, CD274, IL12A	1.7	0.0037
GO:0030048	actin filament-based movement	28	1.2	CAV1, MYO7A, VIM, GJA1, MYO9B, TPM2, TPM4, FRMD6, ANK2, PDE4B, WIPF1, CACNA2D1, ACTC1, ROCK1, ACTN4, MYO1B, MYH3, MYO1E, SUN2, ACTN2, PDE4D, MYH9, FLNA, SYNE2, TNNT1, KCNJ8, STC1, PARVA	1.7	0.0037
GO:2001141	regulation of RNA biosynthetic process	504	21.5	MEF2C, FHIT, MEF2A, FSTL3, FSTL1, ZNF638, RORA, MED20, MAP3K7, EPC2, MC1R, FOXF2, SERPINE1, ILK, PHTF1, OGT, ADAM8, CCNA1, STAG1, PTPRK, ZNF45, RCOR1, MED12, HMG20A, MECOM, DCAF1, TOX2, ZNF37A, MED15, ZZZ3, VGLL3, ZNF516, NFKBIA, AHCTF1, HFE, HSPA1A, ZNF619, ZNF230, MYBL1, ZNF514, HEXIM1, ARNTL2, VEZF1, ZNF69, ASXL2, ZNF624, KLF12, ZNF121, TGFBR1, KLF10, ASXL1, SPHK1, ZNF521, TFCP2, ZNF626, GAS6,…	1.1	0.0064
GO:0051642	centrosome localization	9	0.4	EZR, SYNE2, KIF5B, PLXNA2, SUN2, AURKA, PAFAH1B1, BICD2, ASPM	3	0.0017
GO:0031577	positive regulation of alpha-beta T cell differentiation	12	0.5	SHB, CD83, IL6, IL4R, IL18, HLX, TGFBR2, ANXA1, NCKAP1L, NLRP3, GLI3, AP3B1	2.4	0.0023
GO:0046638	spindle checkpoint	12	0.5	DUSP1, KNL1, BUB1, CENPF, TTK, SPDL1, NDRG1, AURKB, TPR, BUB3, ATM, APC	2.4	0.0023
GO:0030890	positive regulation of B cell proliferation	12	0.5	MEF2C, CARD11, PELI1, IRS2, SLC39A10, CLCF1, BST1, NCKAP1L, ATAD5, TLR4, CD40, NFATC2	2.4	0.0023
GO:0043010	camera-type eye development	52	2.2	RHOJ, WNT5A, MYH15, WNT5B, AGTPBP1, TDRD7, VIM, GJA1, ZEB1, NHS, SOX9, GLI3, TGFB1, EPHB2, TGFB2, ATP2B1, TSPAN12, CCDC66, LPCAT1, GATA3, SOS1, FOXF2, PTN, SKIL, COL8A1, EGFR, BMP4, GPD2, NES, COL4A1, RARG, TGFBR1, TGFBR2, EFEMP1, FBN1, SMAD3, NECTIN3, FZD4, PPP1R13L, EPHA2, FOXP2, INHBA, MAN2A1, ACVR2B, SERPINF1, CLIC4, TENM3, FJX1, FOXC1, SLITRK6, KLF4, BCAR3	1.4	0.0045
GO:0071305	cellular response to vitamin D	7	0.3	ATP2B1, TNC, PIM1, PTN, IL15, SNAI2, KANK2	3.7	0.0013
GO:0003415	cell adhesion involved in heart morphogenesis	4	0.2	RARG, TGFBR2, MEX3C, SOX9	7.9	0.00025
GO:0061343	chondrocyte hypertrophy	4	0.2	FLRT2, TGFBR2, ACVR1, TGFB2	7.9	0.00025
GO:0070301	cellular response to hydrogen peroxide	19	0.8	IL6, MET, ANXA1, AXL, PAWR, AQP1, ECT2, SETX, STAT6, HSPH1, ETS1, RIPK1, AKR1B1, NFE2L2, PDGFD, LRRK2, TNFAIP3, KLF2, KLF4	1.9	0.0032
GO:0010959	regulation of metal ion transport	57	2.4	PTGS2, KCNAB2, TRPV2, GJA1, SPINK1, TGFB1, DMPK, GSTM2, OSR1, SERPINE2, ANK2, STAC, WNK4, PDE4B, ASPH, SIK1, ANO6, AHNAK, PIK3CG, ICAM1, SGK1, KIF5B, ACTN4, PDE4D, ACTN2, PRKCE, FLNA, STOM, CATSPER1, GNB5, CNTN1, STC1, PRNP, CRACR2A, CAV1, GNAI2, FHL1, PML, CACNB1, HFE, CACNB4, FXYD5, UBASH3B, PCSK9, NKX2-5, GLRX, TRPC1, CACNA2D1, GNAO1, LGALS3, OXSR1, P2RX5, CYBA, CORO1A, NEDD4, PLCG2, MYLK	1.4	0.0048
GO:0061384	regulation of bone resorption	11	0.5	EGFR, TNFRSF11B, IL6, S1PR1, UBASH3B, PDK4, CA2, ITGB3, ADAM8, TNFAIP3, SIGLEC15	2.6	0.0022
GO:0031670	heart trabecula morphogenesis	11	0.5	NOTCH1, NOG, S1PR1, TGFBR1, SOS1, FHL2, HEG1, NRG1, NKX2-5, ENG, TGFB2	2.6	0.0022
GO:0001961	cellular response to nutrient	11	0.5	WNT5A, CREBRF, NLRC5, TRIM6, CSF1, EDN1, AXL, CPNE1, PAFAH1B1, HSPA1A, GAS6	2.6	0.0022
GO:0045124	positive regulation of cytokine-mediated signaling pathway	11	0.5	ATP2B1, FOXA2, TNC, PPARG, PIM1, BRIP1, PTN, IL15, SNAI2, GAS6, KANK2	2.6	0.0022
GO:0032814	regulation of macrophage derived foam cell differentiation	10	0.4	IL18, AXL, IL12A, IL15RA, PTPN22, PIBF1, IL15, PRDM1, GAS6, FLT3LG	2.7	0.002
GO:0010743	regulation of natural killer cell activation	10	0.4	CSF2, PPARA, ITGAV, IL18, CSF1, PPARG, NFKBIA, ABCA1, ITGB3, ABCA5	2.7	0.002
GO:2000516	positive regulation of CD4-positive, alpha-beta T cell activation	10	0.4	SHB, CD83, CD55, IL6, IL4R, IL18, HLX, ANXA1, NCKAP1L, NLRP3	2.7	0.002
GO:0048592	eye morphogenesis	30	1.3	WNT5A, PPP2R3A, AGTPBP1, TDRD7, MYO7A, ZEB1, SOX9, GLI3, EPHB2, TSPAN12, NIPBL, CCDC66, FOXF2, CEP290, PTN, COL8A1, BMP4, RARG, EFEMP1, FBN1, ALMS1, NECTIN3, EPHA2, COL5A1, MAN2A1, TENM3, FJX1, MFAP2, PRDM1, BCAR3	1.6	0.004
GO:0035303	regulation of dephosphorylation	30	1.3	MEF2C, DLC1, SLC39A10, NUAK1, TGFB1, IQGAP1, TGFB2, PPP1R12A, MASTL, SPRED1, RBM26, SYMPK, BMP2, ROCK1, SMG6, SWAP70, ROCK2, YWHAB, ITGA1, MPHOSPH10, SMAD3, NCKAP1L, ITGA2, SPOCD1, FARP1, KNL1, SH3RF2, CNEP1R1, PPP1R15A, CCDC8	1.6	0.004
GO:0070555	response to interleukin-1	25	1.1	EDN1, CXCL8, ANKRD1, RORA, SOX9, CCL26, CCL24, IRAK3, HNMT, ADAMTS12, TRAF6, PLCB1, EGR1, IRAK2, PRKCA, ICAM1, IL6, CEBPB, ANXA1, TANK, ADAMTS7, CYBA, ETS1, HAS2, KLF2	1.7	0.0037
GO:0018210	peptidyl-threonine modification	20	0.9	PRKCA, WNT5A, TAF1, PARD3, TGFBR1, SPHK1, TGFBR2, TTK, CLK1, OXSR1, DCAF1, TGFB1, DDIT4, SPRY2, OSR1, TRIM6, SPRED2, SPRED1, LRRK2, ACVR1	1.9	0.0033
GO:0060606	tube closure	21	0.9	WNT5A, DLC1, BMP4, NOG, RARG, MED12, TEAD2, CELSR1, FZD2, SDC4, MTHFD1L, VASP, TGFB1, TGFB2, PRICKLE1, ADM, SEMA4C, KIF20B, APAF1, TRAF6, SETD2	1.9	0.0035
GO:0048711	positive regulation of interleukin-5 production	6	0.3	LIF, NOTCH1, BMP2, SERPINE2, CLCF1, IL6ST	4.3	0.001
GO:0070431	peptidyl-threonine dephosphorylation	6	0.3	ERBIN, NFKBIA, PTPN22, TLR4, HSPA1A, TNFAIP3	4.3	0.001
GO:0032754	nucleotide-binding oligomerization domain containing 2 signaling pathway	6	0.3	PDP1, PPM1F, DUSP5, DUSP4, DUSP18, DUSP1	4.3	0.001
GO:0035970	positive regulation of astrocyte differentiation	6	0.3	IL1RL1, GATA3, IL1RAP, PDE4D, NLRP3, IL17RA	4.3	0.001
GO:0008366	ensheathment of neurons	23	1	PRX, PARD3, EGR2, TLR2, LPAR1, ARHGEF10, TGFB1, LAMA2, MALL, ANK2, CXCR4, NAB2, NAB1, ILK, MYRF, QKI, NDRG1, CNTNAP1, UGT8, PMP22, NRG1, SH3TC2, ERCC2	1.8	0.0036
GO:0007272	axon ensheathment	23	1	PRX, PARD3, EGR2, TLR2, LPAR1, ARHGEF10, TGFB1, LAMA2, MALL, ANK2, CXCR4, NAB2, NAB1, ILK, MYRF, QKI, NDRG1, CNTNAP1, UGT8, PMP22, NRG1, SH3TC2, ERCC2	1.8	0.0036
GO:1903038	negative regulation of leukocyte cell-cell adhesion	22	0.9	BMP4, PPARA, PELI1, CEBPB, LGALS3, ANXA1, HFE, PTPN22, PAWR, SDC4, GLI3, CCL28, PDCD1LG2, TGFB1, HLX, IL4R, CD274, PDE5A, IRF1, PRNP, CEACAM1, KLF4	1.8	0.0036
GO:0042592	homeostatic process	240	10.2	MEF2C, ADCY7, PTGS2, EDN1, NELL2, RORA, LPAR1, AURKB, AQP1, ATP2B1, NOV, S1PR3, PICALM, S1PR1, MALL, ISG15, CTGF, LCAT, WNK4, CCR10, PIK3CA, AFDN, PTBP3, OGT, HTR1D, ADAM8, CRY1, PIK3CG, TTC7A, KIF5B, NCF2, LIG1, RAP1GDS1, CD40, DCLRE1C, NPC1, NNT, VSIG1, MELTF, SERPINF1, KRT16, NPTN, STC1, HAS2, GCNT2, HFE, LETM2, OAS1, SLC29A1, LPCAT1, RAC2, UBASH3B, PPP1R3G, BMP4, TRPC1, SPNS2, LGALS1, SMAD3, …	1.2	0.0061
GO:1903428	metaphase/anaphase transition of cell cycle	14	0.6	EGFR, ICAM1, IL6, HSP90AA1, PTGS2, EDN1, SMAD3, ITGB2, TLR4, SOD2, CYBA, PTX3, KLF2, KLF4	2.2	0.0028
GO:0042993	positive regulation of transcription factor import into nucleus	14	0.6	CSF3, PTGS2, IL18, HCLS1, SPHK1, PPP3R1, TLR2, PTPN22, SMAD3, TLR4, FLNA, DDX58, TMEM173, TRIP6	2.2	0.0028
GO:0044784	positive regulation of reactive oxygen species biosynthetic process	14	0.6	DLGAP5, CENPF, TTK, CENPE, ESPL1, RB1, UBE2C, CDC27, ATM, DUSP1, BUB1, TPR, BUB3, APC	2.2	0.0028
GO:0043434	response to peptide hormone	69	2.9	PPARA, ADCY7, CPEB2, PPARG, EDN1, TLR2, GJA1, RANGAP1, FER, TGFB1, IQGAP1, ACVR1C, CTGF, PIK3CA, OGT, PAK1, CRY1, ERRFI1, CEACAM1, GPR173, PID1, EGR1, IRS2, EGR2, C2CD5, SOCS3, ACTN2, CDC5L, IRS1, LPIN1, HHEX, EREG, ADM, SORT1, GNB4, CA2, GSTP1, CAV2, CAV1, GNAI2, GNAI1, GNG11, TIMP4, TIMP1, PHIP, ZFP36L1, PTK2, SOS1, PCSK9, IL6, PTPRE, FBN1, PDK4, ANXA1, NR4A2, STAT1, NKX6-1, PTPN11, CYBA, RAB31…	1.4	0.0053
GO:0007204	positive regulation of cytosolic calcium ion concentration	49	2.1	GNA13, CAV1, GNA15, EDN1, GJA1, LPAR1, CCL28, TGFB1, EDNRA, GSTM2, EDNRB, KISS1, S1PR3, S1PR1, ANK2, ERO1A, CXCR4, SAA1, UBASH3B, CCR10, DLG4, TGM2, ASPH, RASA3, HTR1D, PIK3CG, TRPC1, CACNA2D1, PTGER4, SWAP70, PDE4D, PRKCE, PTGFR, ITPR3, ITPR1, ITPR2, P2RX5, CYBA, CD55, CORO1A, PLCE1, ADM, PLCG2, TBXA2R, NPTN, ADRA1B, FAM155A, GPR17, ABL2	1.4	0.0048
GO:0051092	digestive tract development	28	1.2	WNT5A, ITGB4, CXCL8, GLI3, TGFB1, TGFB2, EDNRB, NIPBL, FAT4, HLX, GATA3, PTK6, FOXF2, PDGFC, PCSK5, EGFR, KLF5, BMP4, CLMP, TGFBR2, SIX2, SMAD3, RB1, SHOX2, NOTCH1, ACVR2B, ITGA6, PRDM1	1.7	0.0041
GO:0048565	positive regulation of NF-kappaB transcription factor activity	28	1.2	WNT5A, TRAF1, TLR2, NFKBIA, TLR4, ITGB2, HSPA1A, FER, TGFB1, MAP3K7, IRAK3, NOD1, TRIM8, IL1RAP, ADAM8, TRAF6, TRAF5, CHUK, RHEBL1, IRAK2, ICAM1, ARHGEF2, IL6, SPHK1, CD40, NLRP3, CARD11, RIPK1	1.7	0.0041
GO:0021700	developmental maturation	44	1.9	FGFR1, AP1M1, CDK5R2, PPARG, FAM20C, GJA1, AURKA, IL15, SCARF1, TGFB2, NRCAM, EDNRB, SHB, PICALM, BLOC1S5, S1PR1, FAT4, GATA3, POU2F2, DLG4, PTBP3, AGRN, RUNX2, ANO6, ERCC2, SCLT1, BMP2, EPAS1, PLD6, NTN4, AXL, NR4A2, BRCA2, NPR2, RB1, SHANK1, NKX6-1, RAB32, GNAQ, EREG, C1QL1, RAB38, KLF2, LRRK2	1.5	0.0048
GO:0043588	skin development	44	1.9	WNT5A, FRAS1, FOSL2, PDGFA, FST, ITGB4, SFN, SOX9, LATS2, TGFB2, AKR1C3, FOXQ1, HPSE, SOS1, CYP26B1, YAP1, LTB, ERRFI1, ERCC2, EGFR, ANXA1, GJB3, ITGA2, ITGA3, CELSR1, GORAB, FLNB, STK4, EPHA2, COL5A1, ATP7A, WDR48, INHBA, NOTCH1, DKK1, ITGA6, NCOA3, EREG, KRT16, LAMA5, FLG, CLIC4, SLITRK5, LRP4	1.5	0.0048
GO:0006022	aminoglycan metabolic process	34	1.5	GCNT2, SPOCK3, GALNT5, CSPG4, BCAN, IL15, SDC4, DSE, TGFB1, ST3GAL2, CD44, SLC35D1, HPSE, ST3GAL6, CHST11, B3GNT3, B3GNT2, AGRN, CHST15, B4GALT6, B4GALT5, MKI67, PIM1, CHST2, CHST3, NDNF, GLCE, CHST7, CHSY3, CSGALNACT2, HAS2, FOXC1, EXT1, HS3ST3B1	1.6	0.0044
GO:0050870	positive regulation of T cell activation	40	1.7	CAV1, IL6ST, IL18, PTPN22, IL15, IL7R, GLI3, TGFB1, MAP3K7, HSPH1, SHB, GATA3, IL4R, HLX, PIK3CA, PAK1, TRAF6, ADAM8, EBI3, AP3B1, IL6, LGALS1, TGFBR2, EFNB2, ANXA1, HLA-A, NCKAP1L, RICTOR, HLA-E, NLRP3, PDCD1LG2, PTPN11, CD83, CARD11, CD55, CORO1A, FYN, CD59, CD274, IL12A	1.5	0.0047
GO:0000302	response to reactive oxygen species	40	1.7	EDN1, PAWR, FER, AQP1, SETX, STAT6, AKR1C3, HSPH1, ERO1A, GPX3, GPX8, PDGFD, FOSL1, PTPRK, IL6, GNAO1, MET, ANXA1, AXL, STAT1, ECT2, SOD2, ATP7A, CYBA, PLK3, DUSP1, UCP2, ETS1, RIPK1, FBLN5, MTR, AKR1B1, KPNA4, NFE2L2, AREG, KLF2, TNFAIP3, LRRK2, KLF4, GSTP1	1.5	0.0047
GO:0051252	regulation of RNA metabolic process	519	22.2	MEF2C, FHIT, MEF2A, FSTL3, FSTL1, CLK1, ZNF638, RORA, MED20, MAP3K7, EPC2, MC1R, FOXF2, SERPINE1, ILK, DHX34, PHTF1, PTBP3, OGT, ADAM8, CCNA1, STAG1, PTPRK, ZNF45, RCOR1, MED12, HMG20A, MECOM, DCAF1, TOX2, ZNF37A, MED15, ZZZ3, VGLL3, ZNF516, NFKBIA, AHCTF1, HFE, HSPA1A, ZNF619, ZNF230, MYBL1, ZNF514, HEXIM1, ARNTL2, VEZF1, ASXL2, ZNF69, ZNF624, KLF12, ZNF121, TGFBR1, KLF10, ASXL1, SPHK1, ZNF521, …	1.1	0.007
GO:0003013	circulatory system process	84	3.6	CYB5R3, PPARA, MEF2A, TACR3, PTGS2, EDN1, PPARG, TBX20, GJA1, TGFB1, TGFB2, DMPK, ATP2B1, EDNRA, EDNRB, GSTM2, PLCB3, ANK2, CTGF, PLOD3, PDE4B, PIK3CA, ERAP2, SEMA3A, ASPH, HTR1D, CEACAM1, EGFR, PIK3CG, ICAM1, SGK1, HSP90AA1, RAP1GDS1, PDE4D, FLNA, SLIT2, VEGFC, ADM, NAV2, HTR7, PDE5A, STC1, FOXC1, CAV1, ADORA2B, ADAMTS16, CACNB1, AKAP13, CACNB4, HRH1, ECE1, P2RY2, ARHGAP42, HEG1, PCSK5, NKX2-5, …	1.3	0.0056
GO:0006355	regulation of transcription, DNA-templated	498	21.3	MEF2C, FHIT, MEF2A, FSTL3, FSTL1, ZNF638, RORA, MED20, MAP3K7, EPC2, MC1R, FOXF2, SERPINE1, ILK, PHTF1, OGT, ADAM8, CCNA1, STAG1, PTPRK, ZNF45, RCOR1, MED12, HMG20A, MECOM, DCAF1, TOX2, ZNF37A, MED15, ZZZ3, VGLL3, ZNF516, NFKBIA, AHCTF1, HFE, HSPA1A, ZNF619, ZNF230, MYBL1, ZNF514, HEXIM1, ARNTL2, VEZF1, ZNF69, ASXL2, ZNF624, KLF12, ZNF121, TGFBR1, KLF10, ASXL1, SPHK1, ZNF521, TFCP2, ZNF626, GAS6,…	1.1	0.0069
GO:0007260	tyrosine phosphorylation of STAT protein	18	0.8	CSF2, IL6, CAV1, SOCS3, IL6ST, HCLS1, IL18, PIBF1, FER, CD40, IL15, IL31RA, LIF, CLCF1, FYN, PTK6, IL12A, INPP5F	2	0.0035
[truncated: 384 more rows]
